# Supplementary material for: Detection of genomic structure variants associated with wrinkled skin in Xiang pig by next generation sequencing
Source: publisher site journal article supplement (doi:10.18632/aging.203711), 2021-11-27
Supplement: Supplementary file [file aging-v13i22-203711-supplementary-material-SD1.pdf]

SUPPLEMENTARY FIGURES

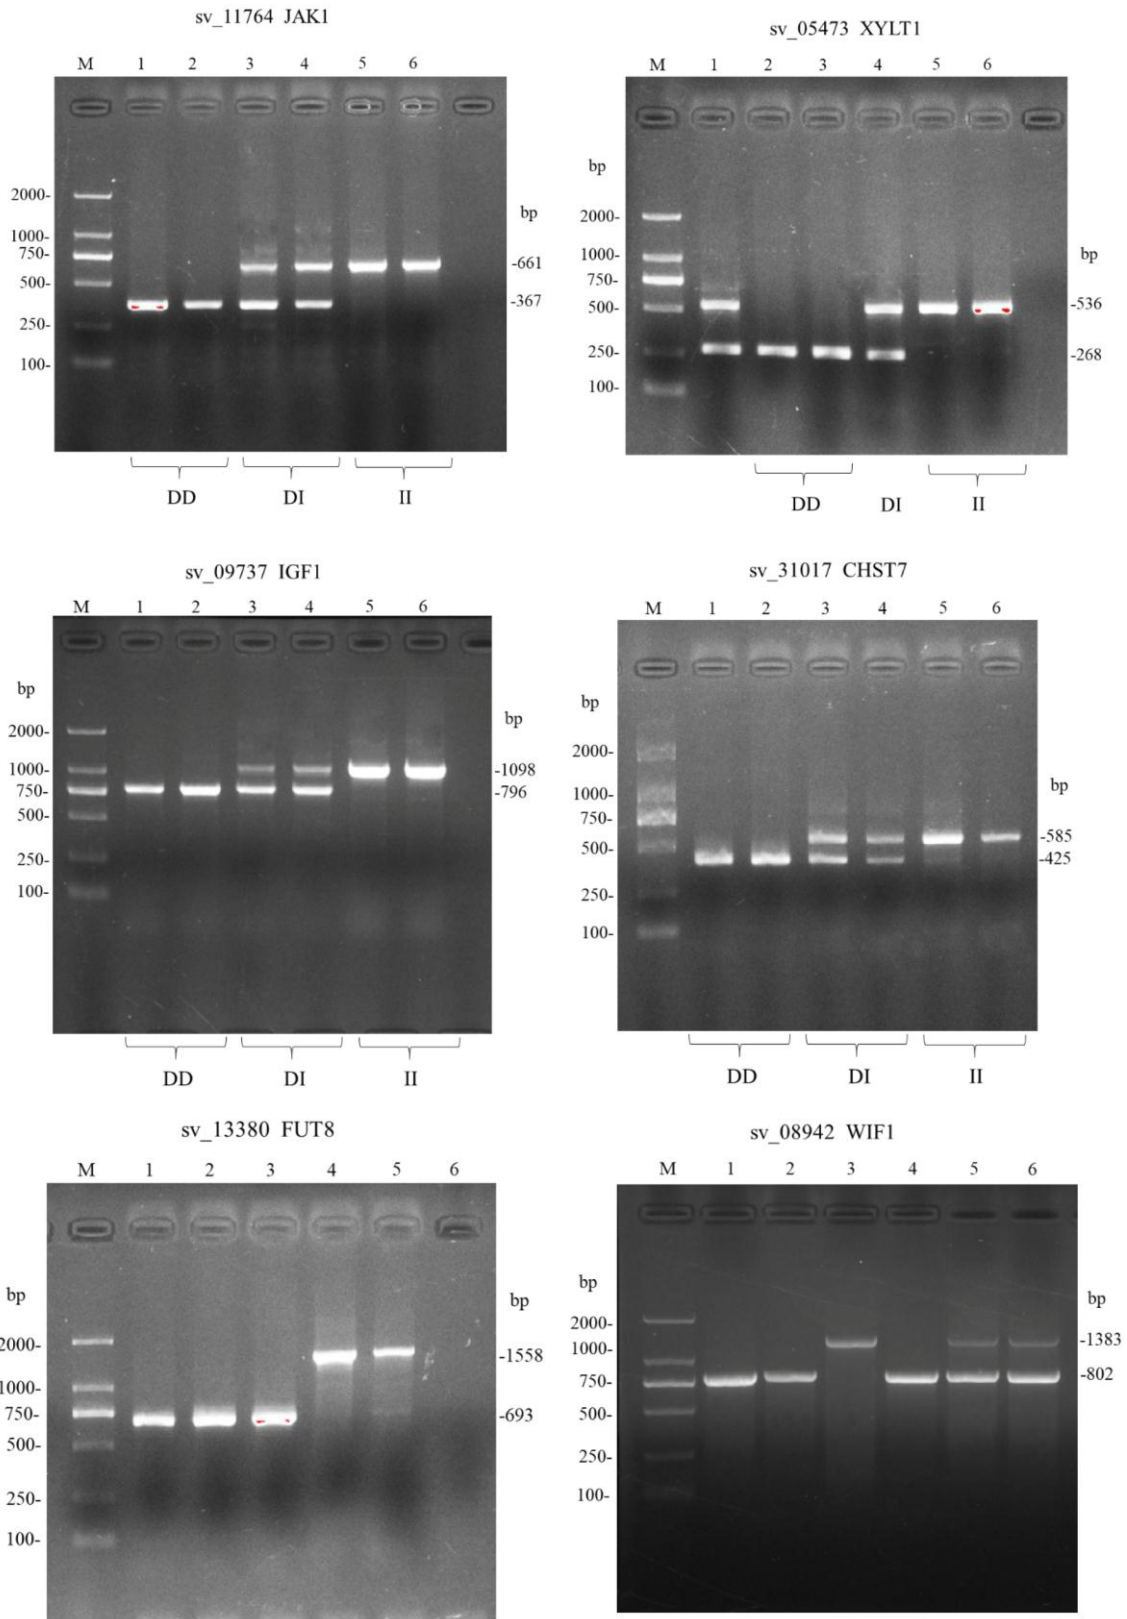

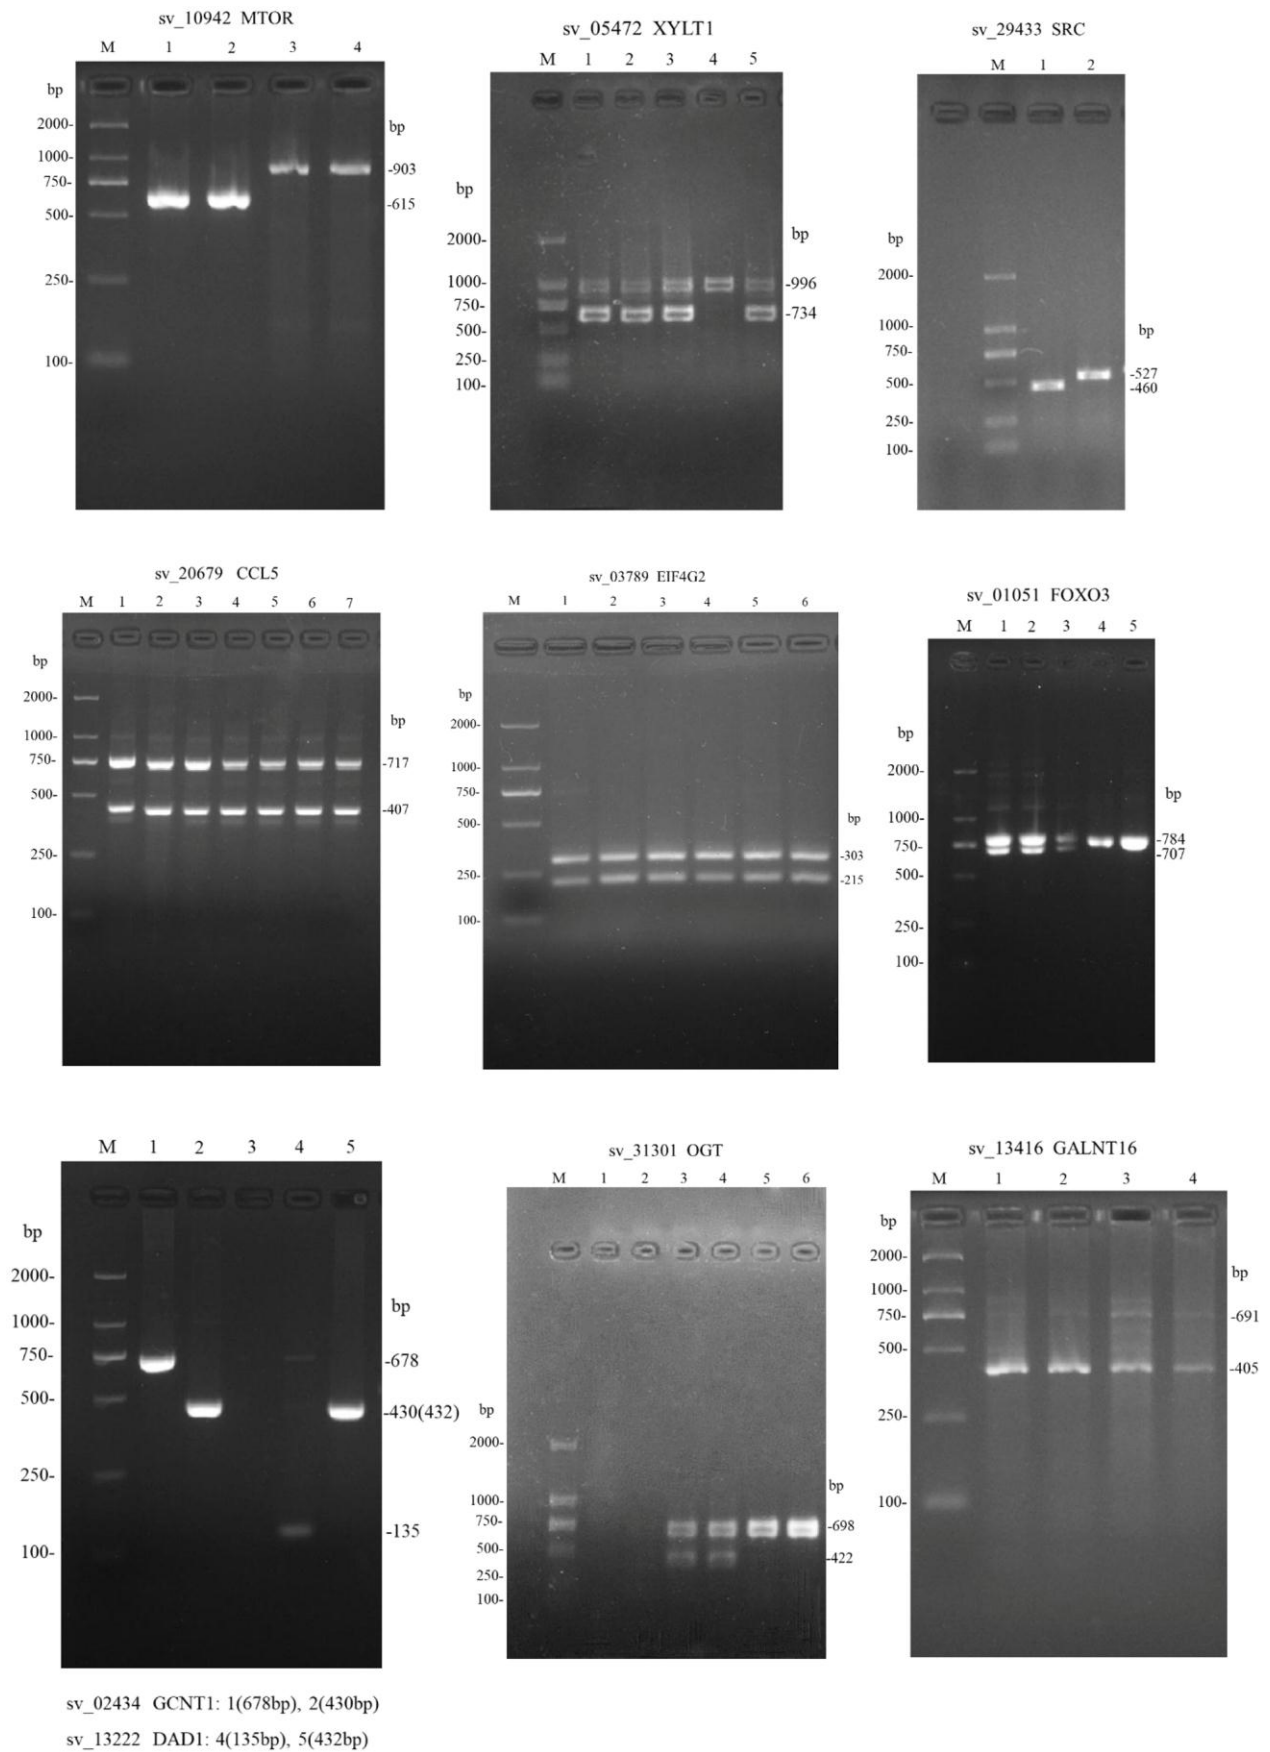

sv\_02434 GCNT1: 1(678bp), 2(430bp)

sv\_13222 DAD1: 4(135bp), 5(432bp)

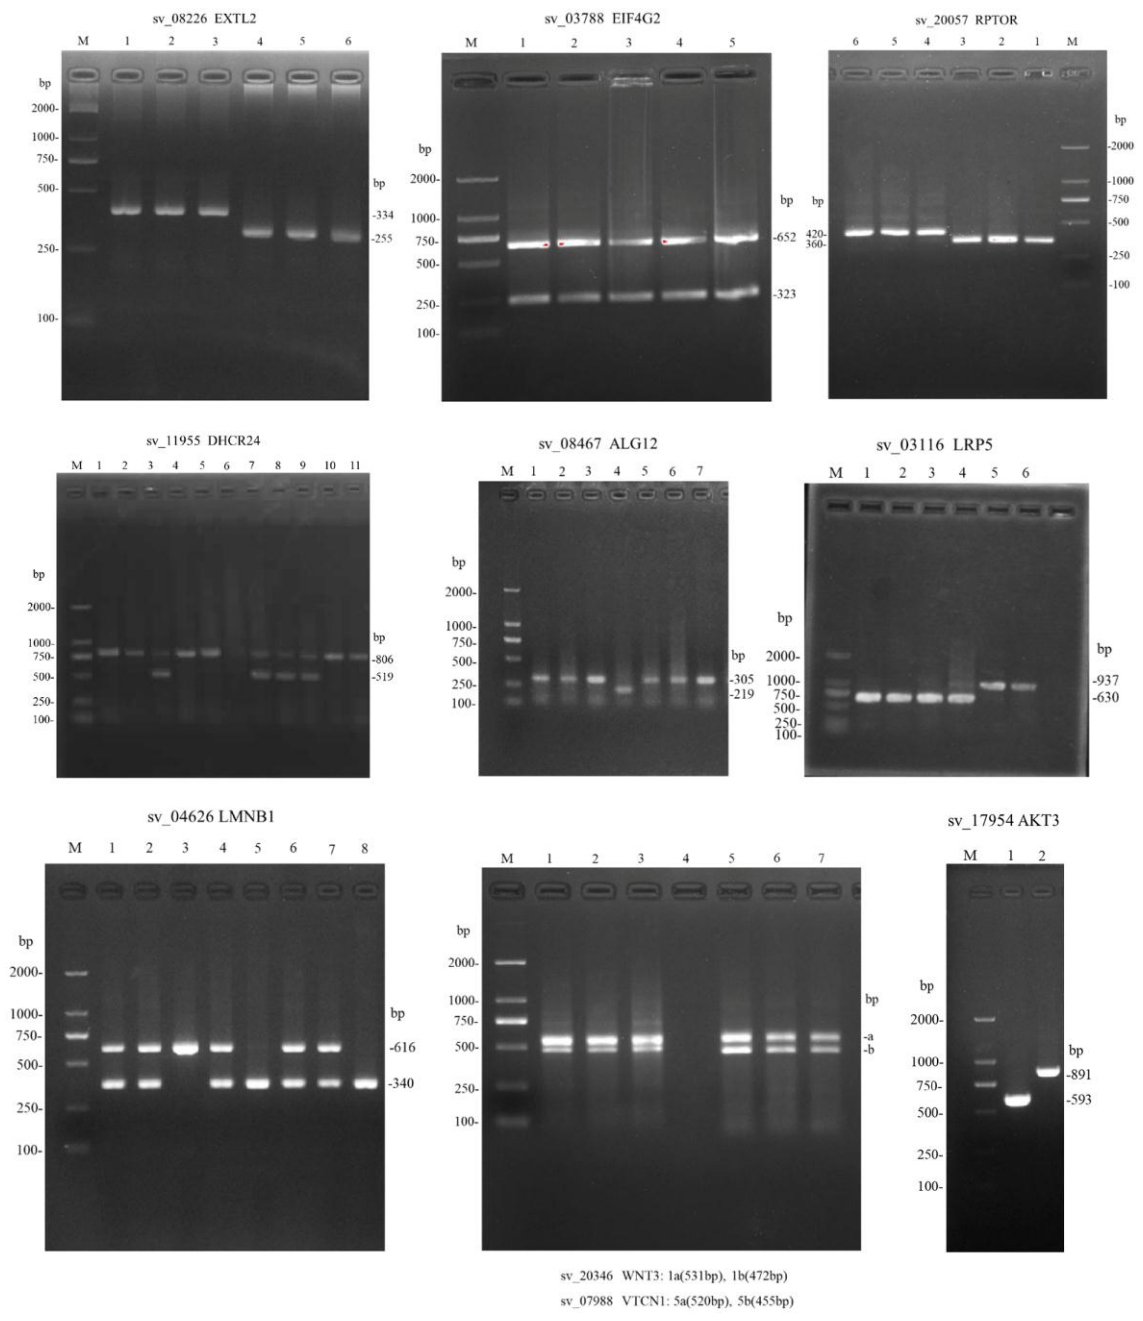

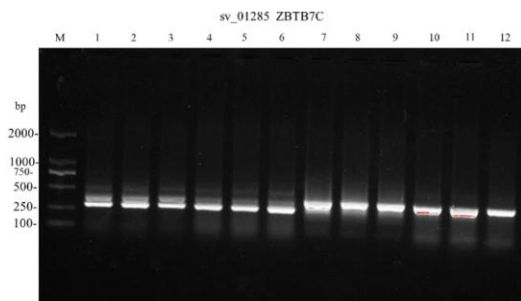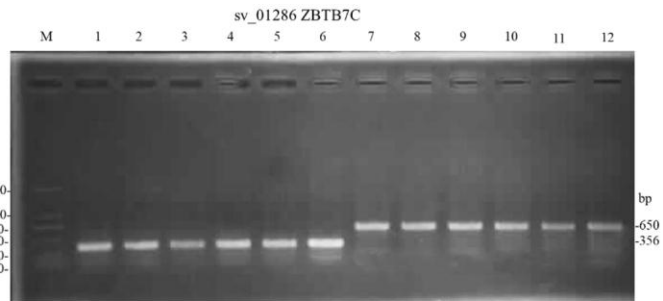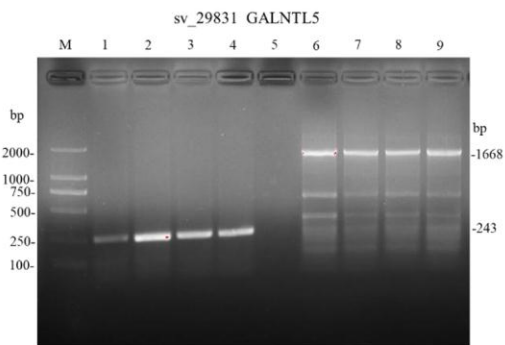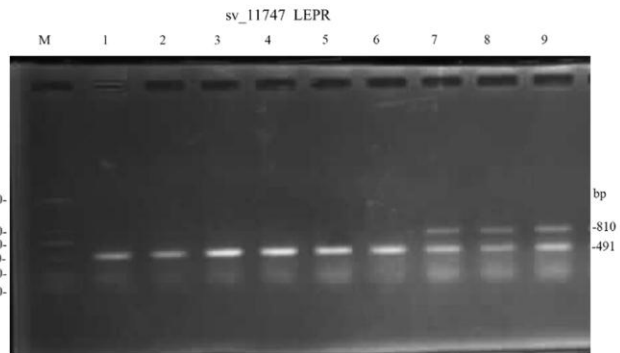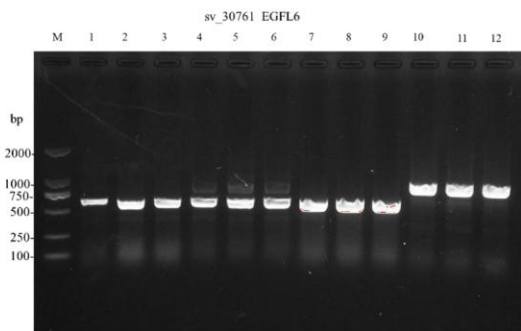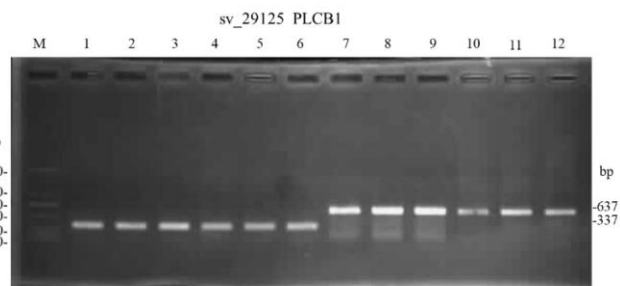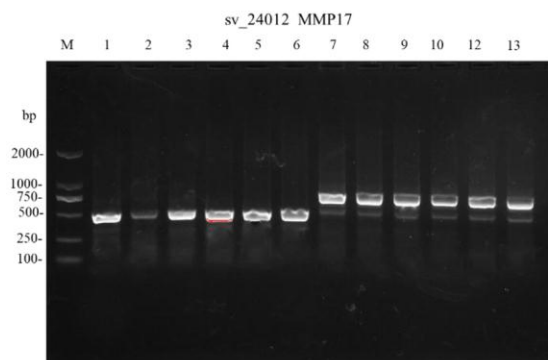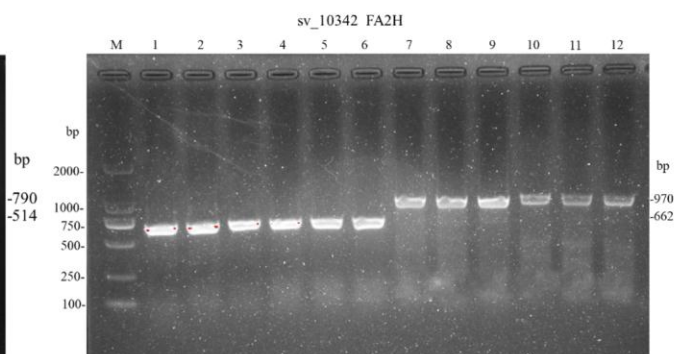

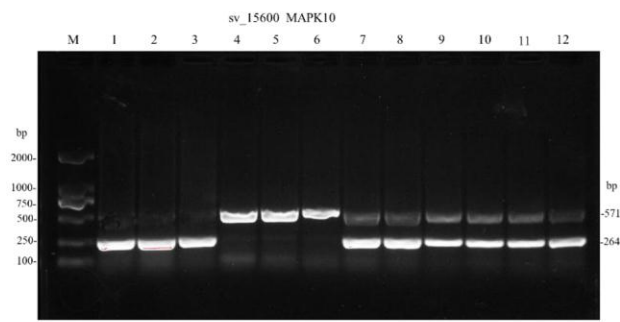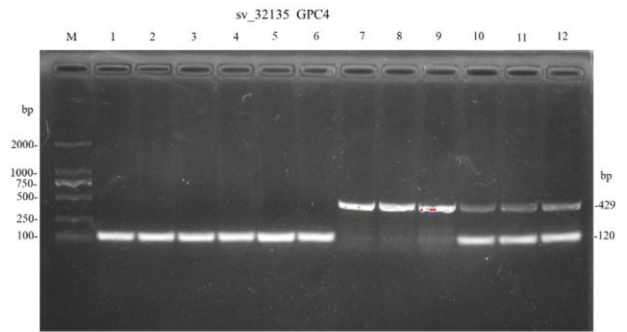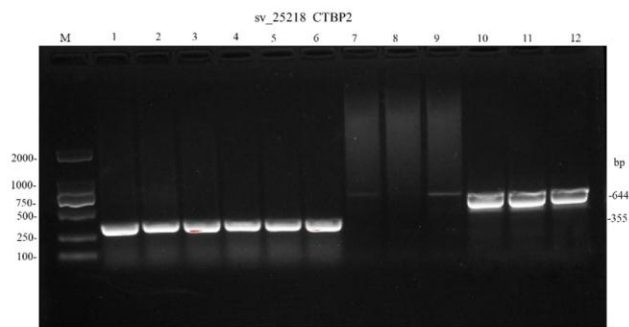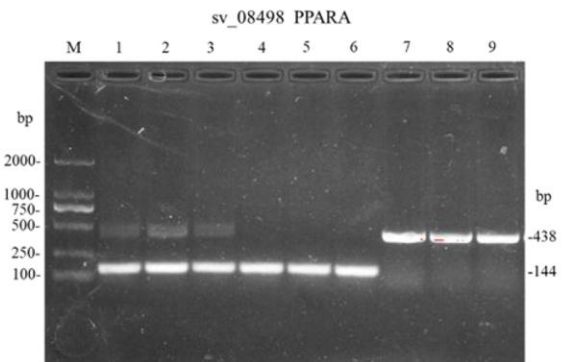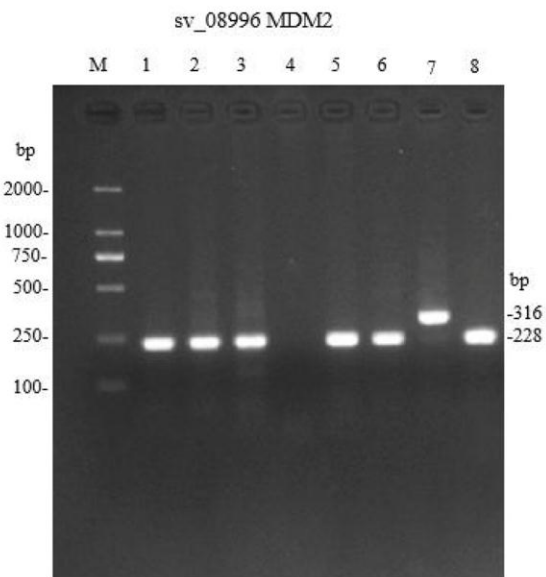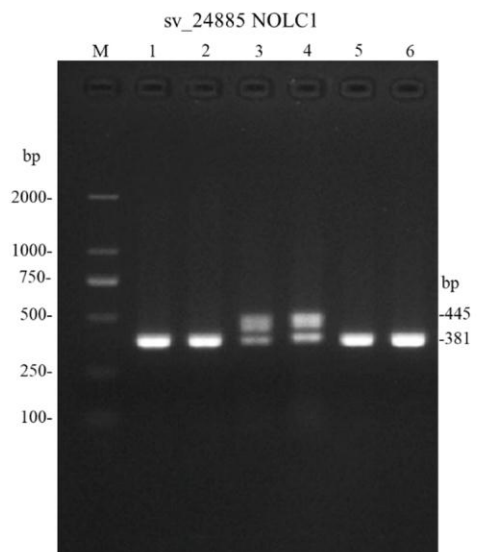

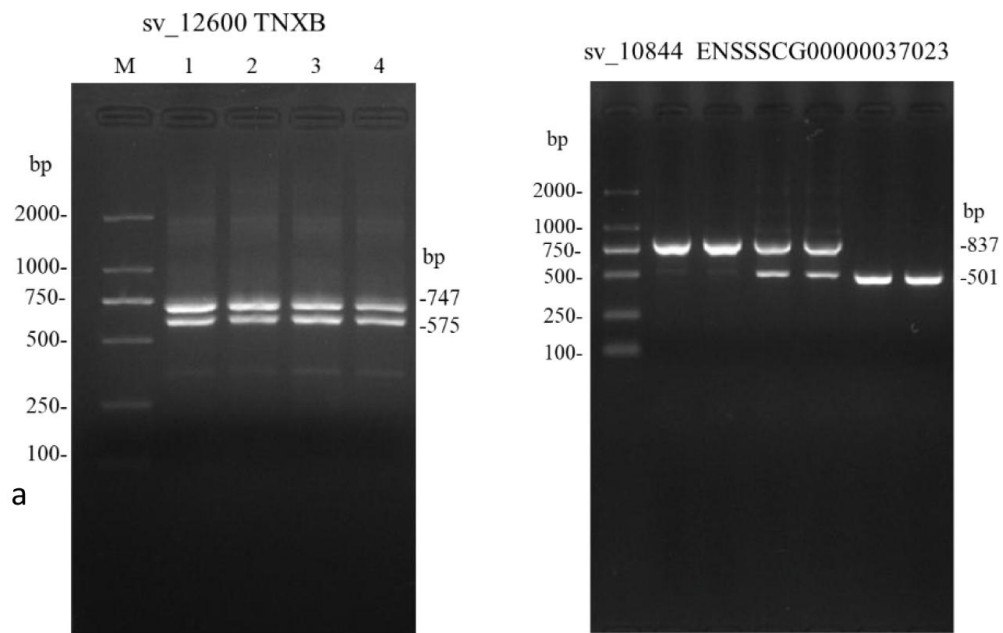

**Supplementary Figure 1. Representative gel images for the confirmation of SVs.** Note: About 38 SVs really exist in genome. Most genes detected three genotypes, namely normal genotype (II), heterozygous genotype (DI), mutant genotype (DD). See diagram SV\_11764.



## ***MDM2***

### **Aberrant transcripts (395 bp)**

Sbjct 33174918 TCAGACAAGCAAATAGCCCTCTTTCATAGAAAGACTGAGCACTTTATAGTCAGATGCCTC 33174977  
Sbjct 33174978 AGCACTGGGCCCTGAGGGTAGCCAGGTAAGTCTGCGAGAGTCCTTTAGGTACTGTCTCTC 33175037  
Sbjct 33175038 AGTTTGCATAGCCTTGTTGTTCTCATGGATACAAACCCTGTCTCTTTCAAGCTAGATG 33175097  
Sbjct 33175098 TTTTGTAGGCTTGTCTCTTAGGTGCAGGCTCTAAAAGTTGGGGTGCCAGATGTGGGATTC 33175157  
Sbjct 33175158 AAACATTTTCTTCTCAGGGA 33175177  
AGCTAGATGTTTTGTAGGCTTGTCTCTTAGGTGCAGGCTCTAAAAGTTGGGGTGCCAGATG  
TGGGATTCAAACATTTTCTTCTCAGGGA  
Sbjct 33175178 GCAGCTTGGAGTTGTGTGTTCTCCTTATTGATTGTGGGTTGCTATACCA 33175224

## ***NOLC1***

### **pre-mRNA (389 bp)**

Sbjct 113163333 TACCAAAGCCGCTACTAAAGCAGCTCCAGCAAAGAAGGCAGCAGAGAGCTCTTCAGATA 113163392  
Sbjct 113163393 GCTCAGGTAAGGCATATGGAGGCCTTTGGGGCAGTGGGAGCTCCAGGGACTCCCCAGAGT 113163452  
Sbjct 113163453 CTAGTTTGGGAGCCACTGATTCTATTCTTGTCTGTAGACTCTGACAGTTCTGAGGATG 113163512  
Sbjct 113163513 AAGCTCCTCCAAGCCAGCCAGTGCCACCAAGAATTCAAGTAAGCCAGCTGCCACTCCCA 113163572  
Sbjct 113163573 AGCAGTCTATAG 113163584  
CTAAGCCAGCCAGTGCCACCAAGAATTCAAGTAAGCCAGCTGCCACTCCCAAGCAGTCTATAG  
Sbjct 113163585 CTAAGCCAGCCACAAGTTCCAAGCAGCCTGTAGGCAGTGCCAGAAGCCTCTGACCAGAA 113163644  
Sbjct 113163645 AGGCTGATAGCAGCTCCAGTGAGGAGGAGAGCAGTTCTAGTGAGGACGAGAAGATGAAGA 113163704  
Sbjct 113163705 AGACTGTAGCAACGCCT 113163721

### **Aberrant transcripts (296 bp)**

Sbjct 113163333 TACCAAAGCCGCTACTAAAGCAGCTCCAGCAAAGAAGGCAGCAGAGAGCTCTTCAGATA 113163392  
Sbjct 113163393 GCTCAG 113163398  
Sbjct 113163492 ACTCTGACAGTTCTGAGGATGAAGCTCTGCCAAGCCAGCCAGTGCCACCAAGAATTCAA 113163551  
Sbjct 113163552 GTAAGCCAGCTGCCACTCCCAAGCAGTCTATAGCTAAGCCAGCCACAAGTTCCAAGCAGC 113163611  
Sbjct 113163612 CTGTAGGCAGTGCCAGAAGCCTCTGACCAGAAAGGCTGATAGCAGCTCCAGTGAGGAGG 113163671  
Sbjct 113163672 AGAGCAGTTCTAGTGAGGACGAGAAGATGAAGAAGACTGTAGCAACGCCT 113163721

**Supplementary Figure 2. The abnormal transcript information of *MDM2* and *NOLC1* gene.** Note: Blue letters represent exons, black letters represent introns. And the red shading and yellow filled sequences denote insertion site and variant fragment, severally.

*XYLT1* sv\_05472

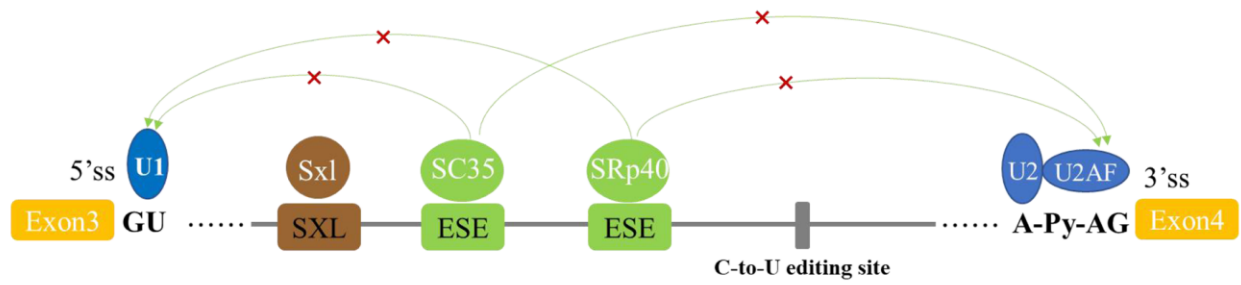

*FUT8* sv\_13380

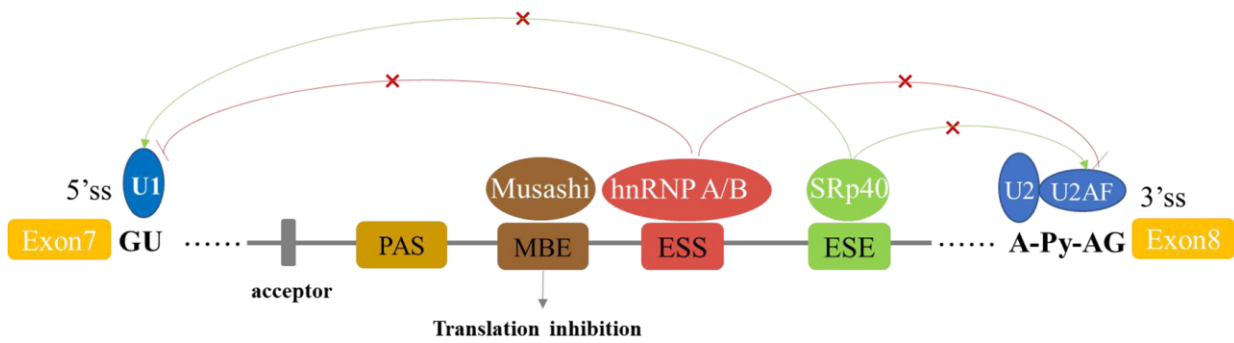

**Supplementary Figure 3. Splice sites, regulatory elements and splicing alterations caused by mutations.** Note: Intron mutations lead to the loss of splicing elements and may lose the enhancement or inhibition of splicing.
