# Supplementary material for: Detection of genomic structure variants associated with wrinkled skin in Xiang pig by next generation sequencing
Source: publisher site journal article supplement (doi:10.18632/aging.203711), 2021-11-27
Supplement: Supplementary file [file aging-v13i22-203711-supplementary-material-SD2.pdf]

## SUPPLEMENTARY TABLES

**Supplementary Table 1. Statistics of WXP incidence in recent years.**

| Years | Number of piglets | Wrinkled pigs | Occurrence rate(%) |
|-------|-------------------|---------------|--------------------|
| 2016  | 480               | 5             | 1.04               |
| 2017  | 587               | 13            | 2.21               |
| 2018  | 725               | 22            | 3.03               |
| 2019  | 832               | 26            | 3.13               |
| 2020  | 403               | 9             | 2.23               |

**Supplementary Table 2. Skin thickness and subcutaneous fat thickness of Xiang pigs.**

| Sample | Month | Skin thickness (mm) | Subcutaneous fat thickness(mm) | Average skin thickness (mm) | Average thickness of subcutaneous fat (mm) |
|--------|-------|---------------------|--------------------------------|-----------------------------|--------------------------------------------|
|        | 1     | 9.5                 | 5                              |                             |                                            |
|        | 2     | 9                   | 4                              |                             |                                            |
|        | 3     | 9                   | 5                              |                             |                                            |
|        | 4     | 9                   | 4                              |                             |                                            |
|        | 5     | 9.5                 | 4                              |                             |                                            |
|        | 6     | 9.5                 | 5                              |                             |                                            |
|        | 7     | 9                   | 5                              |                             |                                            |
|        | 8     | 9                   | 4                              |                             |                                            |
|        | 9     | 9                   | 5                              |                             |                                            |
|        | 10    | 9                   | 3                              |                             |                                            |
|        | 11    | 9                   | 4                              |                             |                                            |
|        | 12    | 9                   | 3                              |                             |                                            |
| XP     | 13    | 9                   | 4                              | 4.42±0.71                   | 17.84±6.89                                 |
|        | 14    | 9                   | 5                              |                             |                                            |
|        | 15    | 5.4                 | 3                              |                             |                                            |
|        | 16    | 5.5                 | 4                              |                             |                                            |
|        | 17    | 5.5                 | 5                              |                             |                                            |
|        | 18    | 5.4                 | 4                              |                             |                                            |
|        | 19    | 5.4                 | 4                              |                             |                                            |
|        | 20    | 5.5                 | 4                              |                             |                                            |
|        | 21    | 5.4                 | 3                              |                             |                                            |
|        | 22    | 5.5                 | 5                              |                             |                                            |
|        | 23    | 5.5                 | 4                              |                             |                                            |
|        | 24    | 5.4                 | 4                              |                             |                                            |
|        | 25    | 20                  | 5                              |                             |                                            |
|        | 1     | 18                  | 9.5                            |                             |                                            |
|        | 2     | 24                  | 9                              |                             |                                            |
| WXP    | 3     | 30                  | 7                              | 9.10±3.75 <sup>A</sup>      | 15.2±9.65                                  |
|        | 4     | 36                  | 15                             |                             |                                            |
|        | 5     | 5.5                 | 5                              |                             |                                            |

<sup>A</sup>, and <sup>a</sup>denote  $P < 0.01$ ,  $P < 0.05$ , respectively, two-tailed t test.

**Supplementary Table 3. The epidermal thickness of Xiang pigs.**

| Populations | Epidermal thickness(n=60, $\mu\text{m}$ ) |
|-------------|-------------------------------------------|
| WXP         | 212.00 $\pm$ 124.24 <sup>A</sup>          |
| XP          | 104.38 $\pm$ 34.29                        |

<sup>A</sup>, and <sup>a</sup> denote  $P < 0.01$ ,  $P < 0.05$ , respectively, two-tailed t test.

**Supplementary Table 4. The information of 21 pig resequencing data downloaded from the NCBI.**

| Accession  | Breed       | Individuals | Raw Base(G) | Clean Base(G) | Map Base(G) | Map ratio(%) | Depth(X) |
|------------|-------------|-------------|-------------|---------------|-------------|--------------|----------|
| ERR173180  | Landrace    | LA1         | 19.00       | 17.91         | 17.88       | 99.83        | 7.31     |
| ERR173181  | Landrace    | LA2         | 28.10       | 26.71         | 26.65       | 99.78        | 10.90    |
| ERR173182  | Landrace    | LA3         | 18.40       | 17.37         | 17.26       | 99.37        | 7.06     |
| ERR977276  | Landrace    | LA4         | 12.26       | 10.55         | 10.15       | 96.21        | 4.15     |
| ERR977277  | Landrace    | LA5         | 17.61       | 15.90         | 15.35       | 96.54        | 6.28     |
| SRR1581042 | Landrace    | LA6         | 29.89       | 25.87         | 24.31       | 93.97        | 9.94     |
| SRR1581043 | Landrace    | LA7         | 32.62       | 28.61         | 26.85       | 93.85        | 10.98    |
| ERR173198  | Large White | LW1         | 17.60       | 16.82         | 16.60       | 98.69        | 6.79     |
| ERR173196  | Large White | LW2         | 19.20       | 18.31         | 18.21       | 99.45        | 7.45     |
| ERR173197  | Large White | LW3         | 17.50       | 16.52         | 16.38       | 99.15        | 6.70     |
| SRR4341302 | Large White | LW4         | 23.00       | 22.78         | 21.85       | 95.92        | 8.94     |
| SRR4341326 | Large White | LW5         | 20.60       | 20.31         | 19.72       | 97.10        | 8.07     |
| SRR3123346 | Large White | LW6         | 35.51       | 33.64         | 33.01       | 98.13        | 13.50    |
| SRR3123347 | Large White | LW7         | 46.88       | 44.68         | 43.63       | 97.65        | 17.84    |
| SRR5337426 | Duroc       | DU1         | 17.75       | 17.20         | 16.68       | 96.98        | 6.82     |
| SRR5337627 | Duroc       | DU2         | 16.13       | 15.62         | 15.22       | 97.44        | 6.22     |
| SRR5337652 | Duroc       | DU3         | 17.21       | 16.70         | 16.25       | 97.31        | 6.65     |
| SRR5337661 | Duroc       | DU4         | 16.95       | 16.41         | 16.06       | 97.87        | 6.57     |
| SRR4341281 | Duroc       | DU5         | 27.60       | 26.93         | 25.60       | 95.06        | 10.47    |
| SRR5351767 | Duroc       | DU6         | 17.99       | 17.47         | 17.06       | 97.65        | 6.98     |
| SRR5357804 | Duroc       | DU7         | 16.75       | 16.10         | 15.68       | 97.39        | 6.41     |

**Supplementary Table 5. Counts of raw SVs in pig genomes detected by Pindel and SoftSV programs.**

| <b>Group</b> | <b>pig</b> | <b>Pindel</b> | <b>SoftSV</b> | <b>Overlap</b> | <b>DEL</b> | <b>DUP</b> | <b>INV</b> | <b>INS</b> |
|--------------|------------|---------------|---------------|----------------|------------|------------|------------|------------|
| WXP          | WXP1       | 22534         | 18672         | 6329           | 5225       | 424        | 25         | 655        |
|              | WXP2       | 22699         | 22338         | 7565           | 6572       | 387        | 25         | 581        |
|              | WXP3       | 15901         | 29093         | 8905           | 8099       | 317        | 29         | 460        |
|              | WXP4       | 16839         | 28919         | 9555           | 8618       | 367        | 32         | 538        |
|              | WXP5       | 26358         | 36836         | 12490          | 10918      | 634        | 64         | 874        |
|              | WXP6       | 28204         | 43634         | 13105          | 11644      | 572        | 35         | 854        |
|              | WXP7       | 27961         | 43657         | 12995          | 11442      | 600        | 30         | 923        |
| XP           | XP1        | 21986         | 29120         | 12368          | 11268      | 307        | 99         | 694        |
|              | XP2        | 25251         | 30300         | 12915          | 11465      | 372        | 124        | 954        |
|              | XP3        | 31268         | 39334         | 19109          | 17048      | 877        | 192        | 992        |
|              | XP4        | 22106         | 28521         | 12066          | 10946      | 296        | 97         | 727        |
|              | XP5        | 23033         | 29205         | 12193          | 10988      | 302        | 97         | 806        |
|              | XP6        | 31322         | 39243         | 19006          | 16887      | 886        | 180        | 1053       |
|              | XP7        | 22615         | 39593         | 12549          | 11174      | 515        | 28         | 832        |
| LA           | LA1        | 1972          | 2290          | 1280           | 1170       | 82         | 3          | 25         |
|              | LA2        | 2760          | 2696          | 1389           | 1232       | 105        | 8          | 44         |
|              | LA3        | 1869          | 2035          | 970            | 881        | 63         | 2          | 24         |
|              | LA4        | 4541          | 9046          | 2804           | 2538       | 224        | 13         | 29         |
|              | LA5        | 7784          | 13642         | 4926           | 4427       | 417        | 15         | 67         |
|              | LA6        | 11501         | 16769         | 7439           | 6701       | 557        | 20         | 161        |
|              | LA7        | 12033         | 17911         | 8554           | 7221       | 1166       | 23         | 144        |
| LW           | LW1        | 1839          | 2095          | 1119           | 1049       | 40         | 6          | 24         |
|              | LW2        | 1942          | 2175          | 1197           | 1103       | 61         | 5          | 28         |
|              | LW3        | 1786          | 2047          | 1096           | 1014       | 46         | 5          | 31         |
|              | LW4        | 11712         | 15013         | 7444           | 6696       | 511        | 22         | 215        |
|              | LW5        | 10142         | 13403         | 6523           | 5895       | 480        | 27         | 121        |
|              | LW6        | 13183         | 15171         | 6950           | 5929       | 801        | 14         | 206        |
|              | LW7        | 15600         | 18047         | 8669           | 7458       | 933        | 17         | 261        |
| DU           | DU1        | 5905          | 9021          | 3459           | 2986       | 400        | 8          | 65         |
|              | DU2        | 5131          | 8687          | 3148           | 2790       | 298        | 6          | 54         |
|              | DU3        | 5839          | 9055          | 3515           | 3061       | 388        | 7          | 59         |
|              | DU4        | 5597          | 8831          | 3361           | 2937       | 352        | 7          | 65         |
|              | DU5        | 10877         | 13403         | 5876           | 5155       | 492        | 42         | 187        |
|              | DU6        | 6067          | 9085          | 3489           | 2994       | 411        | 9          | 75         |
|              | DU7        | 12112         | 18389         | 8436           | 7456       | 816        | 21         | 143        |
