# Supplementary material for: Detection of genomic structure variants associated with wrinkled skin in Xiang pig by next generation sequencing
Source: Aging (Albany NY). 2021 Nov 27;13(22):24710–39. doi: 10.18632/aging.203711 (PMC8660620; doi:10.18632/aging.203711)
Supplement: Supplementary Table 6 [file aging-13-203711-s003.xlsx]

## Sheet: Sheet1
Supplementary Table 6. Confident SVs identified from 35 individuals.
NO.	chr	start	end	length	type	ref	variation	pair	pig	gene	feature	consequence	impact	symbol	biotype	location	WXP	XP	EUP	toal
sv_00001	1	119871	119926	55	DEL	CTGTCGCCTGTGTTTTTGGTGACAGCCATTCTGAAAGCTGTGAGGTGACATCTCAT	C	7	WXP5,XP6,XP7,LW4,LW5,LA6,LA7,DU4,DU7	ENSSSCG00000029697	ENSSSCT00000038814.2	downstream_gene_variant	MODIFIER	FAM120B	protein_coding	DISTANCE=1217,STRAND=-1	1	2	6	9
sv_00002	1	246994	261298	14304	DEL	CGAGAGCCTGAGTGGGACCACCAATAGCTCCAAAAAAGCCTGTCGAGTGGGCTAGCTTTTCACAAGGGCTTCGTCTGTGTGCAAGCACCTGCCTGATCCCTGCAGCCCCAGGGTGGGGCAGGGTCCCATCTGCAGCTGAGATACAGATCTTGGCACCGGGAATGCCATGCTTTCCAGGATCCACAGAGGCACACGTGTGCTCGTGCGTGCACACCCTCACATGGGGGCCAGCACACCCCTCGCCATCGTACTCACCACCACCAGGGACCACCAGCCGCAGAGCTCAAGTTACGGCCTCGCAGGTGTGGCTTTGCGTCAATGTCACCTCATTCTGAAGACGTGTGAGTCCCTCCTGGCTCCTGACCTGGGGAGGGTCACCTTCCTCCCTGGCAGGGCTGA…	C	3	XP2,XP3	-	-	intergenic_variant	MODIFIER	-	-	-	0	2	0	2
sv_00003	1	376973	377185	212	DEL	CCAGTGAAGATGTGTCCAGAGGGCCTGGAAGAGGCGCCAGGAAGGGCGCCTGCTCGGTGTCCACACAGCACGAAGGAAGCGCGAGGCTGGACATCGTAAGAAGGGCACTCTGAAGGAAAGTTAGGCTGGGGACAGGCTGGAGAGCTCGAGGGTGTCCTGCCACCTCTCCCAGACATCCCCTCCAGACGTCCCCTCCAGCCGCACCCACCGGCT	C	13	WXP4,WXP5,LW6,LW7,DU6	ENSSSCG00000050193	ENSSSCT00000074442.1	non_coding_transcript_exon_variant,intron_variant,feature_truncation	MODIFIER	-	lncRNA	EXON=1/2,INTRON=1/1,STRAND=1	2	0	3	5
sv_00004	1	480682	485075	4393	DEL	GGCCTCCTCTAAACAGTATAGTTGGGTCTTTTGAAAAAAAATCCAATCTAATGATCTCTGTTTTTAATTGATATGATAAGAAGCCATTTATATTTAATGTAATAACTGATATGTTTGGATTTAAGTCTGCTATTTTATTATTTGTTTTTGTGTCTGTCCCCTAGTTCTTCATTTCTCTATTTCCCTTTCCTATCCTTCTTAGACGTACTAGAATGTCTTTTAATCTTGTATCTTAATTTCTCTGAGGGTCTGGTCTACAGCTCTTCCTATAGCTGTGTGGGTGTGTGGCTGCTGTAGCTGTTACAAATTACAAGTTTACCTTCTCATCACTGCGTGTGGAATAAAGAAAACTTCCCTGCCCCATTATATTGCATTACATCTACATAGATTGCAAACATC…	G	5	XP3,XP4,XP6,DU5	ENSSSCG00000047845	ENSSSCT00000077472.1	coding_sequence_variant,5_prime_UTR_variant,feature_truncation	MODIFIER	-	protein_coding	EXON=1/1,STRAND=1	0	3	1	4
sv_00005	1	496810	496810	69	INS	C	CGGGACTCAGCCATCGCACTGCTGGGAATTTTTCAGAAGAAGATGAAAATGAACCTGCAGAGCCGTCACG	4	WXP5,WXP7,XP1,XP4,XP7	-	-	intergenic_variant	MODIFIER	-	-	-	2	3	0	5
sv_00006	1	498404	499047	643	DEL	CGGAGACAGAGACAGACAGAGACAGAGATAGAGCCAGACAGAGACAGAGACAGACAGAGACAGAAGAGAAGAGACAGAAAGAGACAGAGAGACAGAGACAGAGATAGAGACAGAAAGAGACAGAGACAGAGACAGAGATAGA	C	6	LW6,LW7	-	-	intergenic_variant	MODIFIER	-	-	-	0	0	2	2
sv_00007	1	498929	499027	98	DUP:TANDEM	GAGACAGAGACAGACAGAGACAGAGACAGACATAGAGACAGATAGAGATAGAGACAGAGATAGACGGAGACAGAGACAGACAGAGACAGAGATAGATGG	GAGACAGAGACAGACAGAGACAGAGACAGACATAGAGACAGATAGAGATAGAGACAGAGATAGACGGAGACAGAGACAGACAGAGACAGAGATAGATGGAGACAGAGACAGACAGAGACAGAGACAGACATAGAGACAGATAGAGATAGAGACAGAGATAGACGGAGACAGAGACAGACAGAGACAGAGATAGATGG	6	LW6,LW7	-	-	intergenic_variant	MODIFIER	-	-	-	0	0	2	2
sv_00008	1	525334	525553	219	DEL	GGATCCAGCTTGTTTCTGTGGAGGCACTGGGTTGATCCCTGGCCTGGGAACTTCCATATACTAAGGGTACGGCCAAAAAGGAAAAACATTTTAAAAAATTTTAAAAAGTGATTAAAAGCTTATTACATTAGGAGTTCCCGTCCTGGCACAGTGGTTAACGAATCCAACTAGGAACCATGAGGTCTCGGGTTCAGTCCCTGCCCTTGCTCAGTGGGTTAAC	G	13	WXP1,WXP2,WXP4,WXP5,WXP6,XP1,XP2,XP4,XP7	ENSSSCG00000004010	ENSSSCT00000004434.4	intron_variant,feature_truncation	MODIFIER	ERMARD	protein_coding	INTRON=10/15,STRAND=-1	5	4	0	9
sv_00009	1	704463	705014	551	DEL	AGGACAGGGAGGAGGGAAATGCTGCTCTGGGGACATAATTGGCATTTGTGCTTGTCTTATTCTTAACCAAGTCCGTTAAGGAAAAAGAGCCCCAAAGTACAGATTGGAGACTTGAACTCGAAATGGAAAGAACGGTGGCTTTTGAGAACTCAAAATATTTTAATTTTCTTTTAAAAACTCTAAATGCCTTAAGAAGGTGTTTAATCTGATGTTATTTATAGCCCTGAAGTGTAGGCAGTTTTGTTTGAAGTCTAACCGTGTAGAGATGCAATGGATGTAGAGTTAACACTGTTTTACCGTCCACGGGGCTCCCTGAGTGATAAAGACGCATTTTCAGACCACGAAGCTAAGGCCCAGACGCCCACCCAAAACAGAGCAACCGAGTGGCAGCAGTCCACG…	A	16	WXP3,WXP5,WXP7,XP1,XP7,LW5,LW6,LW7	ENSSSCG00000004008	ENSSSCT00000004431.4	intron_variant,feature_truncation	MODIFIER	-	protein_coding	INTRON=24/24,STRAND=1	3	2	3	8
sv_00010	1	705176	705235	59	DEL	ACTTTGGGGTTCCAGACAGCAGCTACGAGGGAGGCAGGATTTAGAGGTTATCATTCAGGC	A	11	WXP6,XP3,XP4,XP6	ENSSSCG00000004008	ENSSSCT00000004431.4	intron_variant,feature_truncation	MODIFIER	-	protein_coding	INTRON=24/24,STRAND=1	1	3	0	4
sv_00011	1	765236	765314	78	DEL	GTGTTCGTTACTAGAAACGTTTGTGTAGGATTCACAGCCTGTGGTTATCTCGACAGCAACCAAAGAAGCATTAAAAGAA	G	22	WXP1,WXP3,WXP4,WXP5,WXP7,XP7	-	-	intergenic_variant	MODIFIER	-	-	-	5	1	0	6
sv_00012	1	886372	886457	85	DEL	CCCCCAGGGCCCCGCCCCCCCACTGGGCAAAGCCGTCCTGCCTTGTCAAACACGGGTGAGACCTTGGTGCCGCCCAACCGTGAGGT	C	13	LW5,LW6,LW7,DU2,DU5	ENSSSCG00000004012	ENSSSCT00000004436.4	downstream_gene_variant	MODIFIER	THBS2	protein_coding	DISTANCE=3907,STRAND=1	0	0	5	5
sv_00013	1	1136857	1136942	85	DEL	CCACTATGGAAGCGAGGGTTCCCTGGCTATTCTAACCAAGGTGCCATGAACTATGAGCTTTTCCAGTAAAAACTGGTAGCAATAGG	C	6	WXP4,WXP7,XP3,XP6,XP7,LW2,LW4	ENSSSCG00000044353	ENSSSCT00000086285.1	downstream_gene_variant	MODIFIER	-	lncRNA	DISTANCE=3549,STRAND=-1	2	3	2	7
sv_00014	1	1179869	1179950	81	DEL	TGGACGTGGGCGCTATCTCCCCAGACCCTCCTGGCCAGGTTGCTGGAAAGCCCACGCTTACAGCCGCTTTCCCGCCAGGACG	T	6	WXP6,XP7	-	-	intergenic_variant	MODIFIER	-	-	-	1	1	0	2
sv_00015	1	1243888	1246947	3059	DEL	CAGCCGTAGCTCCACACTCAGGAGCCCCAGCCGCTGGCGGGGCCGCTCTTTCCGCGAGCTCTCCTGGACAACACACGGCTTCTTGAATGTTCCCTTGGCGCTTTTCCAGACATTTTATTAGTGATATAATTTATGGCGTGAGTGTCTGGGCACAAGATGCTTCACGTGCTCCATCCGGGGACACGCTATAGCTCAGACGTGGCTCTGGAAAAGTCTCCAGACATCCCTGTGGAGGATCTGACGTCAGAGCTGAAACTTCATCAGGAGCACAACAGGACAGACTGGGCAGCCAGCTCGTCAACTTTGCTGAGCAGGTTGGAAGACGCGGAGGATTTTCCTGCCGCGTCAGAAGACAGCCCACGCCTGTTTCTACCAACATCCTGGCTCAGGTCAGAATGG…	C	5	XP4,LW5,DU5	ENSSSCG00000004013	ENSSSCT00000004437.4	intron_variant,feature_truncation	MODIFIER	SMOC2	protein_coding	INTRON=7/13,STRAND=-1	0	1	2	3
sv_00016	1	1302074	1302721	647	DEL	GATGGGTTCCGGGCCAGTAGAATTTATTCTCCTGCGAACGGAAACGCTGGAGCTTTTGTTTTAAATGCAATTGAGTTTTCCAGTTTCGACAGAGAAGGCCCTGTGTTTGCCTCCACGAGAAATGTTCTCATCGAATACAACCTGCACCTTTTCACGCACAAGAGAAGCACGGGAGAGACATCGGTTTGTTTAAATACATTCACTGATGATTCCAGAAGCAGATTCAATATGAGACTTAAAATTCAAAGCGATCGATTAGCTAAGAGGGATTCAAGAAACCAGATGACCCACTTCTAAGGTGGACATGAGGTCACGACAGGAAGAGGGCTGAGGAGAACGCGGGGGTGCCCTAGAGGGCTAGGCGCAGGGTTCCAACCTCCTGGCAGAATAAGATCACAG…	G	14	WXP3,XP1,XP7,LW1,LW2,LW3,LW5,LW7,LA5,LA6,DU5	ENSSSCG00000004013	ENSSSCT00000004437.4	intron_variant,feature_truncation	MODIFIER	SMOC2	protein_coding	INTRON=1/13,STRAND=-1	1	2	8	11
sv_00017	1	1321613	1321699	86	DEL	AGGTGCAGCCAGGATGCTGGGGGAGGGGGCAGAGGGCAGGCTGGTGGTGCAGCCGTGATGCTGAGGCAGGGGCAGGCCGGAGGAGGG	A	3	XP3,XP6	ENSSSCG00000004013	ENSSSCT00000004437.4	intron_variant,feature_truncation	MODIFIER	SMOC2	protein_coding	INTRON=1/13,STRAND=-1	0	2	0	2
sv_00018	1	1399493	1399639	146	DUP:TANDEM	CCCACGCGGCAGGTAAAGGACAGAAGCAAGAACAGCCTGCAGAGAGGCACAGCCGGCCTGTCTCGTGCTGAGGGGCTGGGAGACAGCTGGCCCGTCACCCTGTACCATCTCACCACCCGCTGCCAGCAGGGCACCTCTGTTTGAGGA	CCCACGCGGCAGGTAAAGGACAGAAGCAAGAACAGCCTGCAGAGAGGCACAGCCGGCCTGTCTCGTGCTGAGGGGCTGGGAGACAGCTGGCCCGTCACCCTGTACCATCTCACCACCCGCTGCCAGCAGGGCACCTCTGTTTGAGGACCACGCGGCAGGTAAAGGACAGAAGCAAGAACAGCCTGCAGAGAGGCACAGCCGGCCTGTCTCGTGCTGAGGGGCTGGGAGACAGCTGGCCCGTCACCCTGTACCATCTCACCACCCGCTGCCAGCAGGGCACCTCTGTTTGAGGA	7	WXP5,WXP6,WXP7,XP3,XP4,XP7	-	-	intergenic_variant	MODIFIER	-	-	-	3	3	0	6
sv_00019	1	1518367	1518892	525	DEL	GCCACCCACGGCCCCACAGGGTCACCCAGAATCACCCACGATCACCCAGCATCACCCAGAGTCACCTCGA GTCTCCCATGGTCACCAGAGTCACCTCGAGTCTCCCATAGTCACCCAGCATTACCCAGAGTCACCTCGAG TCTCCCATGGTCACCCAGCATTACCCAGAGTCACCTCGAGTCACCCATGGTCACCCAGAGTCACCTCGAG TCTCCCATGGTCACCCAGCATTACCCAGAGTCACCTAGAGTCACCCATGGTCACCCAGCATCACCCAGAT TCTCCCAGAGCCTCCCATGGTCACCCAGCATCACCCAGAGTCACCTCGAGTCACCTATGGTCACCCAGAG TCACCTCGAGTCTCCCATGGTCACCCAGAGTCACCTCGAGTCTC…	G	5	XP2,XP3	ENSSSCG00000004017	ENSSSCT00000027970.3	intron_variant,feature_truncation	MODIFIER	-	protein_coding	INTRON=10/11,STRAND=1	0	2	0	2
sv_00020	1	1820563	1820855	292	DEL	TTCAAAAGGGACCAGGAGTTCCCGTCGTGGCGCAGTGGTTAACGAATCCGATTAGGAACCATGAGGTTGTGGGTTCGGTCCCTGCCCTTGCTCAGTGGGTTAAAGATCCAGCGTTGCCGTGAGCTGTGGTGTAGGTTGCAGACGCGGCTTGGATCCCGCGTTGCTGTGGCTCTGGTGTAGGCCAGTGGCTACAGCTCCAATTCGACCCCTAGCCTGGGAACCTCCATATGCCGCGGGAGCGGCCCAAAGAAATAGCAAAAAAAAAGACAAATAAATAAATAAATAAATAAAAA	T	6	WXP3,XP3,LW6,DU2	ENSSSCG00000043317	ENSSSCT00000067997.1	intron_variant,non_coding_transcript_variant,feature_truncation	MODIFIER	-	lncRNA	INTRON=1/7,STRAND=1	1	1	2	4
sv_00021	1	1842605	1842912	307	DEL	TTGACGCCCTGTTTTATTTTATTTTTTTTGTCTTTTGTCTTTTTTTGTTGTTGTTGTTGTTGTTGTTGCTATTTCTTGGGCCGCTCCCGCGACATATGGAGGTTCCCAGGCCAGGGGTCGAATCGGAGCTGTAGCCACCAGCCTACGCCAGAGCCACAGCAACGCGGGATCCGAGCTGCGTCTGCAATGCACACCACAACTCACGGCAACGCCGGATCGTTAACCCACTGAGCAAGGGCAGGGACCGAACCTGCAACCTCATGGTTCCTAGTCAGATTCGTTAACCACTGCGCCACGACGGGAACTCC	T	9	WXP7,XP3	-	-	intergenic_variant	MODIFIER	-	-	-	1	1	0	2
sv_00022	1	1860210	1860322	112	DEL	CAGAGAGAGCAGGCAGTGTGGACCAGCCAAGCCTGGGATCTGGGGCGTGTCCCCTGGAGAGACAGCGGGCAGTGTGGACCAGCCAAGCCTGGGATCTGGGGCACGTCCCCTGG	C	18	WXP1,WXP3,WXP5,XP1,XP3,XP4,XP7,LW3,LW6	-	-	intergenic_variant	MODIFIER	-	-	-	3	4	2	9
sv_00023	1	1953145	1953452	307	DEL	TAAGAATCCACCTAGTGGAGTTCCCGTCGTGGCGCAGTGGTTAACGAATCCAACTAGGAACCATGAGGTTGCGGGTTCGATCCCTGCCCTTGCTCAGTGGGTTAAGGATCCGGCGTTGCCGTGAGCTGTGGTGTAGGTTGCAGACGCGGCTCGGATCCCGCGTTGCTGTGGCTCTGGCGTAGGCCGGTGGCTACAGCTCCGATTCAACCCCTAGCCTGGGAACCTCCATGTGCCGTGGGAGCGGCCCAAGAAATAGCAACAATAACAACAACAACAAAAAAAGACAAAAGACAAAAAAAAAAAAAAAA	T	7	WXP5,WXP6,XP1,XP3,XP6	ENSSSCG00000027404	ENSSSCT00000004444.4	intron_variant,feature_truncation	MODIFIER	UNC93A	protein_coding	INTRON=8/8,STRAND=1	2	3	0	5
sv_00024	1	1963024	1963330	306	DEL	AATTCCTTTCCGGAGTTCCCGTCGTGGCGCAGTAGTTAACGAATCCGACTAGGAACCATGAGGTTGCGGGTTCGGTCCCTGGTCTTCCTCAGTGGGTTAAGGATCCGGCGTTGCCGTGAGCTGTGGTGTAGGTTGCAGACGCGGCTCGGATCCCGCGTTGCTGTGGCTCTGGCGTAGGCCGGTGGCTACAGCTCCGATTCAACCCCTAGCCTGGGAACCTCCATATGCCGCGGGAGCAGCCCAAAGAAATAGCAACAATAACAACAACAACAACAACAACAACAAAGACAAAAGACAAAAAAAAAAT	A	13	WXP5,LW5,LW6,LW7,DU2,DU5,DU6	ENSSSCG00000027404	ENSSSCT00000004444.4	downstream_gene_variant	MODIFIER	UNC93A	protein_coding	DISTANCE=4885,STRAND=1	1	0	6	7
sv_00025	1	1968163	1968238	75	DEL	GGGGTTATCATGGTCAGCAGAAAACCACTAGGATCCATGAGGAGTAGGTCGATCTGCTTGTCAGTGGGTAGGATGC	G	11	WXP2,WXP6,XP2,XP5,XP7,DU5	ENSSSCG00000051474	ENSSSCT00000087596.1	upstream_gene_variant	MODIFIER	-	lncRNA	DISTANCE=3604,STRAND=-1	2	3	1	6
sv_00026	1	2231020	2231579	559	DUP:TANDEM	CGGGAGTGCAGGAGGGGTGTCTGGCCGGCTCTTCTTGCAGTTTTTGTCCACCTGCCGGCATTGCCTAGACAGGGAGTGCAGGAGGGGTGTCTGGCCGGCCCTTCCTGCAGTTTTGTCCACCCTGCCGTCATTGCCTAGACAGGGAGTGCAGGAGGGGTGTCTGGCCGGCCCTTCTTGCAGTTTTGTCCACCTGCCGGCATTGCCTAGACAGGGAGTGCAGGAGGGGTGTCTGGCCGGCCCTTCTTGCAGTTTTGTCCACCTGCCGGCATTGCCTAGACAGGGAGTGCAGGAGGGGTGTCTGGCCGGCCCTTCCTGCAGTTTTGTCCACCCTGCCGTCATTGCCTAGACAGGGAGTGCAGGAGGGGTGTCTGGCCGGCTCTTCTTGCAGTTTTTGTCCAC…	CGGGAGTGCAGGAGGGGTGTCTGGCCGGCTCTTCTTGCAGTTTTTGTCCACCTGCCGGCATTGCCTAGACAGGGAGTGCAGGAGGGGTGTCTGGCCGGCCCTTCCTGCAGTTTTGTCCACCCTGCCGTCATTGCCTAGACAGGGAGTGCAGGAGGGGTGTCTGGCCGGCCCTTCTTGCAGTTTTGTCCACCTGCCGGCATTGCCTAGACAGGGAGTGCAGGAGGGGTGTCTGGCCGGCCCTTCTTGCAGTTTTGTCCACCTGCCGGCATTGCCTAGACAGGGAGTGCAGGAGGGGTGTCTGGCCGGCCCTTCCTGCAGTTTTGTCCACCCTGCCGTCATTGCCTAGACAGGGAGTGCAGGAGGGGTGTCTGGCCGGCTCTTCTTGCAGTTTTTGTCCAC…	34	WXP5,LW6,LW7,LA6,DU1,DU2,DU6	ENSSSCG00000004022	ENSSSCT00000004447.4	intron_variant	MODIFIER	RPS6KA2	protein_coding	INTRON=2/21,STRAND=1	1	0	6	7
sv_00027	1	2446457	2446906	449	DEL	TAAAAAAAAGAGAAGCCATGAAAAAAAAAAAAAAAAAGAGCACAGAGGGCCCCAAACAAACTGAACCCAAACAGACCCACACCAAGACACATCATAATAAAAATGGCAAAAGTTAGTGATAAAGAGAGGATCCTAAAGGCAGCAAGAGAAAAACAGAATGTTACCTACAAGGGAACCCCCATAAGAATATCAGCTGATTTCTCTACAGAAACACTACAGGCCAGGAGGGAATGGCAAGAGAAATTTAAAGTGCTCAAAGGAAAAAAATATGCAACCTAGAATACTCTATCCAACAAGAATATCATTTAAAATAGAAGGGGAAATAAAAATTTTTCCCAACAAACAAAAACTTAAAGAATACAGCAACACAAAACCCAGGTTAAAGGAAATATTGAAAGG…	T	10	WXP7,DU7	ENSSSCG00000004022	ENSSSCT00000004447.4	intron_variant,feature_truncation	MODIFIER	RPS6KA2	protein_coding	INTRON=5/21,STRAND=1	1	0	1	2
sv_00028	1	2598035	2598950	915	DEL	GCCTGGGCGTACTCTTCTTGGCATTTACTTCATTGATTGGAGTGTTTTCTGCATATACTTGATTCATCCTGGAAATATTTGAAAGAGTTGTTCTAATGAAAAATCTTTGTTCATACAGTGACTCTGAAAAAAGGAGAGAAAACGTTGCCATTCATTTCCAAATGATGGGAGATGACTTATTGTTTATTTCACATTTGAAAATAAATAAATATCGTTTGAAAATTAAATACTATAAAAAGTACAGACAGTTCTGAGTATATATATTTGATTTTGCTTAAAGTAACTGACCTTTCAAATCGGCCAGTTTATTTGAAATAATGCATTCCATACCCTCTCGGTGACATGTAATCGTGTATTTTAGAGGCCCTCTCTGTCCACCCCGTGACCCCAGAAGCACAG…	G	9	WXP7,XP3,XP6	ENSSSCG00000004020	ENSSSCT00000004445.4	downstream_gene_variant	MODIFIER	SFT2D1	protein_coding	DISTANCE=4524,STRAND=1	1	2	0	3
sv_00029	1	2700686	2700984	298	DEL	TCCTCATTTGTAATTTTCTTTTTTTTTTTTTTTGTCTTTTGTCTTTTGTTGTTGTTGTTGCTATTTCTTGGGCCGCTCCCGCGGCATATGGAGGTTCCCAGGCTAGGGGTTGAATCGGAGCTGCAGCCACCGGCCTACGCCAGAGCCACAGCAACGCGGGATCCAAGCCGCGTCTGCAACCTACACCACAGCTCACGGCAACGCTGGATCGTTAACCCACTGAGCAAGGGCAGGGACTGAACCCGAAACCTCATGGTTCCTAGTCAGATTCGTTAACCACTGCGCCACGACGGGAACTC	T	11	WXP2,XP4,LW5,LW6,LW7,LA6	-	-	intergenic_variant	MODIFIER	-	-	-	1	1	4	6
sv_00030	1	2708264	2708577	313	DEL	ACAAACTTTTGGGGAGTTCCCGTCGTGGCGCAGTGGTTAACGAATCCGACTAGGAACCATGAAGTTGCGGGTTCGGTCCCTGCCCTTGCTCAGTGGGTTAACGATCCGGCGTTGCCGTGAGTTGCAGTGTAGGTTGCAGACGCGGTTCGGATCCCGCGTTGCTGTGGCTCTGGCGTAGGCCGGTGGCTGCAGCTCCGATTGGACCCCTAGCCTGGGAACCTCCATATGCTGCGGGAGTGGCCCAAGAAATAGCAACAACAACAACAACAACAACAAAAGACTAAAAAAAAAAAAAAGACAAAAAAAAAAGAAAG	A	13	WXP7,XP2,XP3,XP5	-	-	intergenic_variant	MODIFIER	-	-	-	1	3	0	4
sv_00031	1	2836980	2837864	884	DEL	CGAATCTGGCTAGGAACCATGAGGGTGCGGTTTCGATCCCTGGCCTTGCTCCGGGGTTAAGGAGATCTGGTGTTGCTGTGGCTGTGGTGTAGGCCAGCAGCTGAAGCTCCGATTGGACCCCTGGCCTGGGAATCTCCATGTGCCTCCGGTGCGGCCCTGGAAGGGAAAAAAAAAAAAACACACACAAAACCCAAAAAATACAGCATCGTATATTATAAAAATAGCTTTCCTTAGGACTAAATTGCCTCTAAGGTACTAATGCGTGGTACTAGTGTGAGAGAAAAGTAGAAACAGCTTCCTTTCTCCCAGTTTTTATTTTGAAAAGTATCCCATCTACAGAAAAGCTGCAGGATTCGTACGAGATGAGCTGCTGTCCTCTTCACCTAAATCTCCCATGTG…	C	4	XP4,XP6,LA5,LA7	ENSSSCG00000051209	ENSSSCT00000068632.1	downstream_gene_variant	MODIFIER	-	lncRNA	DISTANCE=2029,STRAND=-1	0	2	2	4
sv_00032	1	2854883	2855173	290	DEL	CTGATTTTTTTTTTTTTTTTTTTGTCTTTTGTCTTTGTTGTTGTTGCTGCTATTTCTTGGCCGCTCCCGCGGCATATGGAGGTTCCAGGCTAGGGTCGAATCGGAGCTGTAGCCACCGGCCTACGCCAGAGCCACAGCAACGCGGATCCGAGCCGCGTCTGCAACCTACACCACAGCTCACGGCAACGCCGGATCGTTAACCCACTGAGCAAGGGCAGGGACCGAACCCGCAACCTCATGGTTCCTAGTCGGATTCGTTAACCACTGCGCCACGATGGGAACTCCTCGTTT	C	11	WXP6,XP3,XP7,DU2,DU5	ENSSSCG00000051209	ENSSSCT00000077849.1	downstream_gene_variant	MODIFIER	-	lncRNA	DISTANCE=701,STRAND=-1	1	2	2	5
sv_00033	1	2892212	2892397	185	DEL	ATGAGGTGGGAATAAGGTGGGGAGGACGGCGATGAGGTGGGAGCGTGGAGATGGGGTGGGAGGATGGCGCAGTTGAGGTGAGAGGGCGGTGATGAGGTGAGAGGGGGTGATGAGGTGGTGATGAGGTGAGGAGGGCGGTGATGAGGTGAGAGGGGGGGGGGGGGGGGGGGGGGGGGGGAGGGGGGG	A	7	XP6,LW2,LW7	ENSSSCG00000034772	ENSSSCT00000051543.1	upstream_gene_variant	MODIFIER	ssc-mir-9831	miRNA	DISTANCE=1345,STRAND=1	0	1	2	3
sv_00034	1	3101792	3102648	856	DEL	CCGCGTTGGTGGCGCCCCACCCAAAGATCTTCGGCGGGTCCTAAATCAGTCCGTTGTGTTCGTGCTGTGTCCTCCACCTGCCCCTGGAGAATGGGTATCGATGCTCTGATAAGCCCGATAAGCGACGCTTTAGCGTTACTGTCTCCTCCTCCGTCTCCCTTCTTTTCCGCCCTCCGTGCGTTCAGCAAATGGTCTTGTGAACAAGTGCTACGACCTGCTGGGAGGCTAAGTGTCAGGTGCGGTGACCCCCACAGACCAGGTCTCTGCCCAGCTTTTACATTCTTGGGGGTGGGGGATGGTGGTGAGGAGGGAGGAGAGAAGCAAACGGCCCGTTTAAGACACGTGCCCAAATGGGGACAACGCAGGTGTTTGCGGGAGTACACGGGAGGGCTCCGAACT…	C	12	WXP4,XP6,LW2,LW4,LW5,LW6,LW7,LA1,LA3,LA4,LA5,LA6,LA7,DU1,DU2,DU3,DU5	-	-	intergenic_variant	MODIFIER	-	-	-	1	1	15	17
sv_00035	1	3252318	3252619	301	DEL	TGAACATGGAGGGAGTTCCCGTCGCGGCGCAGTGGTTAACGAATCCGACTAGGAGCCATGAGGTTGCGGGTTCGGTCCCTGCCCTTGCTCAGTGGGTTGACGATCCGGCGTTGCCGTGAGCTGTGGTGTAGGTTGCGGACGCGGCTCGGATCCCGCGTTGCTGTGGCTCTGGCGTAGGCCGGTGGCTACAGCTCCGATTCAACCCCTAGCCTGGGAACCTCCATATGCCACGGGAGCGGCCCAAGAAATAGCAACAACAACAACAACAACAAAAGACAAAAAAAAAAAAAAAAAAAAAAAAA	T	11	WXP7,XP3,XP6,LA7,DU7	ENSSSCG00000004027	ENSSSCT00000004453.4	intron_variant,feature_truncation	MODIFIER	PDE10A	protein_coding	INTRON=2/23,STRAND=1	1	2	2	5
sv_00036	1	3342730	3343063	333	DEL	TAGAAAAAAGGAGTCCTTGGAGAAGAGACTTGTGGCTGCCTGATGGGAGGGGGAGGGAGTGGGAGGGATCGGGAGCTTGGGCTTATCAGACACAACTTAGAATAGATTTACAAGGAGATCCTGCTGAGTAGCATTGAGAACTATGTCTAGATACTCATGTTGCAACAGAAGAAAGGGTGGGGGGAAAAATGTAATTGCAATGTATACATGTAAGGATAACCTGACCCCCTTGCTGTACAGTGGGAAAATAAAAAAAAATATTAAAAAAAATAAAAATAAAAATAAATAAATTCAGCTATCACTGTAAAAAAAAAAAAAAAGAAAAAGAAAAGAA	T	17	WXP3,WXP6,XP1,XP3,XP7	ENSSSCG00000004027	ENSSSCT00000004453.4	intron_variant,feature_truncation	MODIFIER	PDE10A	protein_coding	INTRON=13/23,STRAND=1	2	3	0	5
sv_00037	1	3345015	3345469	454	DEL	TAAAAAATGTGAATGAATACACAATGGAATACTACTCAGCCATAAAAAAGGATGACATAATGCCATTTGCAGCAACATGGATGGAACTAGAGAATCTCATACTGAGTGAAATGAGCCAGAAAGACAAAGACAAATACCATATGATATCACTTATAACTGGAATCTAATATCCAGCACAAATGAACATCTCCTCAGAAAAGAAAATCATGGACTTGGAGAAGTGACTTGTGGTTGCCTGATGGGAGGGGGAGGGAGTGGGAGGGATCGGGAGCTTGGGCTTATCAGACACAACCTAGAATAGATTTATAAGGAGATCCTGCTGAATAGCATTGAGAACTATGTCTAGATACTCATGTCGCAACAGAAGAAAGGGTGGGGGAAAAAACTGTAACTGCAATG…	T	15	WXP3,WXP4,WXP5,WXP6,XP3,XP4,XP7,LW4,LW5,LW6,LW7,LA1,LA2,LA3,LA5,LA7,DU4,DU5	ENSSSCG00000004027	ENSSSCT00000004453.4	intron_variant,feature_truncation	MODIFIER	PDE10A	protein_coding	INTRON=13/23,STRAND=1	4	3	11	18
sv_00038	1	3349972	3350273	301	DEL	TAAGAATAGTCAATTTTGGAGTTCCCGTCGTGGCGCAGTGGTTAACGAATCCGACTGGGAACCATGAGGTTGCGGGTTCGGTCCCTGCCCTTGCTCAGTGGGTTAACGATCCGGCGTTGCCACGAGCTGTGCTGTAGGTTGCAGACGCGGCTCGGATCCCGAGTTGCTGTGGCTCTGGCGTAGGCCGATGGCTACAGCTCCGATTCAACCCCTAGCCTGGGAACCTCCATATGCCGCGGGAGCGGCCCAAGAAATAGCAACAACAACAACAACAACAAAAGACAAAAAGAGAAAAAAAAAAA	T	13	WXP3,XP1,XP7,DU7	ENSSSCG00000004027	ENSSSCT00000004453.4	intron_variant,feature_truncation	MODIFIER	PDE10A	protein_coding	INTRON=13/23,STRAND=1	1	2	1	4
sv_00039	1	3451267	3451267	68	INS	C	CTCAGGCACCGCTGGTGTGATTGTACAACCAGGGGTCAGGCACGGCTGGTGTGATTGTACAACCAGGGG	6	WXP3,XP6	-	-	intergenic_variant	MODIFIER	-	-	-	1	1	0	2
sv_00040	1	3477170	3477471	301	DEL	TCAATTCATAATTTTTTTTTAATTTTTTGTCTTTTGTCTTTTTGTTGTTGTTGTTGTTGTTGCTATTTCTTGGGCCGCTCCTGCGGCATATGGAGGTTCCCAGGCTAGGGCTCTAATCAGAGCTGTAGCCACCGGCCTACGCCAGAGCCACAGCAACGCGGGATCCGAGCCGCGTCTGCAACCTACACCACAGCTCACGGCAACGCCAGATCATTAACCCACTGAGCAAGGGCAGGGACCAAACCCGCAACCTCATGGTTCCTAGTCGGATTCGTTAACCACTGCGCCACGACGGGAACTCC	T	15	WXP5,XP3,LW4,LW5,LW6,LW7,LA5,LA6,DU1,DU2,DU5,DU7	-	-	intergenic_variant	MODIFIER	-	-	-	1	1	10	12
sv_00041	1	3592400	3593105	705	DEL	GCTTATGAAAGGCCAGTCGAGTTAAAATCCCTCTCGTCCTGACTCGGAAGAGGCGACACCCCAAATCACTCACGAGAAGCGGTCTTGATGCAAACAGCAAGAGGATTTTTATTCCGAGCGCGCTGGGGCCCACAGTCGTACGCCACGCAGGGGTAGAGGACTGCGGCCCCGAGTGTGGAGTCGGGACAGCTTTTATGGGGTTCATAACAAAGCCCGCGCTTTTACAAACTAATCATTTTAAAATATCGCAAACCAGTCAATTCAAAACTTCGAGAGCCCGCGCTTTGTGGACCAATTAATTTTAAGTTGTTCTGGAGTTACATGTTTGTGCCTGTCTCTGGGTGGGGGAGACATATTGTCACCAAGATATATTTATCAGGATTTTCAACATTTTGTGGC…	G	9	LW4,LW7,LA6	-	-	intergenic_variant	MODIFIER	-	-	-	0	0	3	3
sv_00042	1	3615169	3615471	302	DEL	CAAAAAATTAAAAATAGAGGAGTTCCCGTCGTGGCGCAGTGGTTAATGAATCCGACTAGGAACCATGAGGTTGCGGGTTCGGTCCCTGCCCTTGCTCAGTGGGTTAACGATCCGGTGTTGCCCTGAGCTGTGGTGTAGGTTGCAGACGCGGCTTGGATCCCGCGTTGCTGTGGCTCTGGCGTAGGCTGGTGGCTACAGCTCCGATTCGACCCCTAGCCTGGGAACCTCCATATGCCGTGGGAGCGGCCCAAGAAATAGCAACAACAACAACAACAACAACAAAAAAAGACAAAAAGACAAAAA	C	8	LW6,LW7	-	-	intergenic_variant	MODIFIER	-	-	-	0	0	2	2
sv_00043	1	3655781	3655864	83	DUP:TANDEM	CATGTACACTCTAGAAGCAGGGGTGTATCCCTAAGTATACCCCGTGTACACTCTAGAAGCAGGGTGTATCCCTAAGTATACCCT	CATGTACACTCTAGAAGCAGGGGTGTATCCCTAAGTATACCCCGTGTACACTCTAGAAGCAGGGTGTATCCCTAAGTATACCCTATGTACACTCTAGAAGCAGGGGTGTATCCCTAAGTATACCCCGTGTACACTCTAGAAGCAGGGTGTATCCCTAAGTATACCCT	4	XP6,LW6,LA3	-	-	intergenic_variant	MODIFIER	-	-	-	0	1	2	3
sv_00044	1	3673861	3674171	310	DEL	TCTTTTGTCTTTTTGCCATTTCTTTTTTTTTTTTTTTTTTTTGTCTTTTGTTGTTGTTGTTGTTGTTGTTGCTATTTCTTCGGCCGCTCCCACGGCATATGGAGGTTCCCAGGCTAGGGGTTAAATCGGAGCTGTAGCCACCAGCCTGCGCTAGAGCCACAGCAACGCAGGATCCGAGCCGCGTCTGCAACCTACACCACAGCTCACGGCAACGCCGGATCGTTAACCCACTGAGCAAGGGCAGGGACCGAACCCGCAACCTCATGGTTCCTAGTCGGATTCGTTAACCACTGCGCCACGACGGGAACTCC	T	10	WXP7,XP2,XP4,XP5,XP6,LA5,DU5	-	-	intergenic_variant	MODIFIER	-	-	-	1	4	2	7
sv_00045	1	3839468	3839777	309	DEL	ACGTAAGCTTGTTTTTTGGGTTTTTTTTTTAATTTTTTTTTTTGTCTTTTGTTGTTGTTGTTGTTGTTGCTATTTCTTGGGCCGCTCCCGCGGCATATGGAGGTTCCCAGGCTAGGGGTTGAATCGGAGCTGCAGCCACCGTCCTATGCCAGAGCCACAGCAACGCGGGATCCGAGCCGCGTCTGCAACCTACACCACAGCTCACGGCAACGCCGGATCGTTAACCCACTGAGCAAGGGCAGGGACCCAACCCGCAACCTCATGGTTCCTAGTCGGATTCGTTAACCACTGCGCCACGACGGGAACTCCC	A	14	WXP3,XP3,LW4,LW5,LW6,LW7,LA4,LA5,LA6,LA7,DU1,DU2,DU5,DU6	-	-	intergenic_variant	MODIFIER	-	-	-	1	1	12	14
sv_00046	1	3885546	3885663	117	DUP:TANDEM	GTAAGCCAGGCTATTCTCAGGTCTGCATAAGGTACAGCTGCCGGGTACAGGGCAGCAGCCGTCTGGCTCTGCTTTCCACCTCCTCTCCCCTGGCCGCAGAGCATCCCCTGAGACATAA	GTAAGCCAGGCTATTCTCAGGTCTGCATAAGGTACAGCTGCCGGGTACAGGGCAGCAGCCGTCTGGCTCTGCTTTCCACCTCCTCTCCCCTGGCCGCAGAGCATCCCCTGAGACATAATAAGCCAGGCTATTCTCAGGTCTGCATAAGGTACAGCTGCCGGGTACAGGGCAGCAGCCGTCTGGCTCTGCTTTCCACCTCCTCTCCCCTGGCCGCAGAGCATCCCCTGAGACATAA	6	XP3,XP6	-	-	intergenic_variant	MODIFIER	-	-	-	0	2	0	2
sv_00047	1	3902228	3902536	308	DEL	TAAAAATCAACCTCAGGGAGTTCCCGTCGTGGCGCAGTGGTTGACGAATCCGACTAGGAACCATGAGGTTGCGGGTTCGGTCCCTGCCCTTGCTCAGTGGGTTAACGATCCGGCGTTGCCGTGAGCTGTGGTGTAGGTTGCAGACGCGGCTCGGATCTCGCGTTGCTGTGGCTCTGGCGTAGGCCGGTGGCTACAGCTCCGATTCAACCCCTAGTCTGGGACCCTCCATATGCCGCGGGAGCGGCCCAAGAAATAGCAACAACAACAACAACAATAACAACAACAACAAAAGACAAAAAAAAAAAAAAA	T	14	WXP2,WXP6,WXP7,XP3,XP5,XP7	-	-	intergenic_variant	MODIFIER	-	-	-	3	3	0	6
sv_00048	1	4162354	4162406	52	DEL	CAAAGAAAGAAAGAAAGAAAGAAAGAAAGAAAGAAAGAAAGAAAGAAAGAAAG	C	3	WXP6,WXP7,DU1	-	-	intergenic_variant	MODIFIER	-	-	-	2	0	1	3
sv_00049	1	4272158	4272455	297	DEL	TAAAAAATGTGGTCACGGAATTCCCGTCGTGGCGCAGTGGTTAACGAATCCGACTAGGAACCAGGAGGTTGCGGGTTCGGTCCCTGCCCTTGCTCAGTGGGTTAACGATCCGGCGTTGCCGTGAGCTGTGGTGTAGGTTGCAGACGTGGCTCGGATCCCACGTTGCTGTGGCTCTGGTGTAGGCTAGTGGCTACAGCTCCGATTAGACCCCTAGCCTGGGAACCTCCATATGCCGCGGGAGCGGCCCAAGAAATAACAACAACAATAACAACAACAACAACAACAAAAAAAGACAAAA	T	13	WXP3,LW4,LW5,LA6	-	-	intergenic_variant	MODIFIER	-	-	-	1	0	3	4
sv_00050	1	4496112	4496701	589	DEL	CCTAAAAGAGCCATTTTTATTTTTTTTTTAAATTTTTTTATTTTTATTTTTATTTTATTTTCCCACTGTACAGCAAGGGGGTCAGGTTATCCTTACATGTATACATTACAATTACAGTTTTTCCCCCACCATTTCTTCTGTTGCAACATGAGTATCTAGACATAGTTCTCAATGCTATTCAGCGGGATCTCCTTGTAAATCTATTCTAGGTTGTGTCTGATAAGCCCAAGCTCCCGACCCCTCCCACTCCCTCCCCCTCCCATCAGGCAACCACAAGTCTCTTCTCCAAGTCCATGATTTTCTCTTCTGAGGAGATGTTCATTTGTGCTGGATATTAGATTCCAGTTATAAGTGATATCATATGGTATTTGTCTTTGTCTTTCTGGCTCATTTCACTCA…	C	16	WXP6,DU2,DU5,DU6,DU7	-	-	intergenic_variant	MODIFIER	-	-	-	1	0	4	5
sv_00051	1	4635591	4635669	78	DEL	GAAAGAAAGAAAGAAAGAAAGAAAAAAAAAAAAAAAAAAAAAAAAAAAAAAAAAAAAAAAAAAAAAAAAAAAAAAAAAA	G	8	WXP2,WXP3,WXP5,WXP7,DU5	-	-	intergenic_variant	MODIFIER	-	-	-	4	0	1	5
sv_00052	1	4718781	4718831	50	DUP:TANDEM	AGAAGCAGGGAGACCCTGGAAGAAAGGCGTCCAGGCTGACTTCCGTGTCCG	AGAAGCAGGGAGACCCTGGAAGAAAGGCGTCCAGGCTGACTTCCGTGTCCGAAGCAGGGAGACCCTGGAAGAAAGGCGTCCAGGCTGACTTCCGTGTCCGAAGCAGGGAGACCCTGGAAGAAAGGCGTCCAGGCTGACTTCCGTGTCCG	6	LW6,LA6	-	-	intergenic_variant	MODIFIER	-	-	-	0	0	2	2
sv_00053	1	4748699	4748699	59	INS	C	CTTTAGTCATTGAAATATGAGGTTCATCCCTGAAGATGGTGGGAGAAATGGAACTATGTG	8	WXP6,XP2,XP4,DU2,DU4	ENSSSCG00000004029	ENSSSCT00000042383.2	intron_variant,feature_elongation	MODIFIER	QKI	protein_coding	INTRON=5/7,STRAND=-1	1	2	2	5
sv_00054	1	4840064	4840229	165	DUP:TANDEM	AGCTTATACGGATCCTGTTGCAGCAACTGTTGACAAATATACCAAGTAAGGAGCAAGCCAGGATTCAAAACCTAGGCCTGTCTAGCTCAAAACTCAGTATGACCTCAACTGTGTCAGAGTTTTCTCTACTGAATTAACATCCTCACTGCCAGGATACATGTGGTAC	AGCTTATACGGATCCTGTTGCAGCAACTGTTGACAAATATACCAAGTAAGGAGCAAGCCAGGATTCAAAACCTAGGCCTGTCTAGCTCAAAACTCAGTATGACCTCAACTGTGTCAGAGTTTTCTCTACTGAATTAACATCCTCACTGCCAGGATACATGTGGTACGCTTATACGGATCCTGTTGCAGCAACTGTTGACAAATATACCAAGTAAGGAGCAAGCCAGGATTCAAAACCTAGGCCTGTCTAGCTCAAAACTCAGTATGACCTCAACTGTGTCAGAGTTTTCTCTACTGAATTAACATCCTCACTGCCAGGATACATGTGGTAC	8	WXP6,WXP7,XP2,XP4,XP7	ENSSSCG00000004029	ENSSSCT00000042383.2	intron_variant	MODIFIER	QKI	protein_coding	INTRON=2/7,STRAND=-1	2	3	0	5
sv_00055	1	4944621	4944938	317	DEL	ACCACGGTGTGGAGTTCCCGTCGTGGCGCAGTGGTTAACGAATCCGACTAGGAACCATGAGGTTGCGGGTTCGATCCCCGGCCTTGCTCAGTGGATTAACGATCCGGCGTTGCCGTGAGCTGTGGTGTAGGTTGCAGACGTGGCTCGGATCCCGAGTTGCTGTGGCTCTGGCGTAGGCTGGTGGCTACAGCTCCGATTAGACCCCTAGCCTGGGAACCTCCATATGCCGCGGGAGCGGCCCAAGAAATAGCAACAACAACAACAACAACAACAACAAAAGACAAAAGACAAAACAAACAAACAAACAAACAAAAAAAC	A	7	XP7,LW4,LA4,LA7,DU1,DU5	ENSSSCG00000048046	ENSSSCT00000072453.1	intron_variant,non_coding_transcript_variant,feature_truncation	MODIFIER	-	lncRNA	INTRON=1/1,STRAND=1	0	1	5	6
sv_00056	1	4984333	4984624	291	DEL	TCGAGAGGAGATTTTTTTTTTTTTTTTTTTTTGTCTTTTGTTGTTGTTGTTGCTATTTCTTGGGCCGCTCCCGCGGCATATGGAGGTTCCCAGGCTAGGGGTGGAATCGGAGCTGTAGCCACCTGCCTACGCCAGAGCCACAGTAATGCGGGATCCGAGCCGCGTCTGCAACCTACACCACAGCTCACGGCAACGCCGGATCGTTAACCCACTGAGCAAGGGCAGGGACCGAACCCGCAACCTCATGGTTCCTAGTCGGATTCGTTAACCACTGCGCCACGACGGGAACTCC	T	11	LW4,LW5,LW7,LA4,LA5,LA6,LA7	ENSSSCG00000038153	ENSSSCT00000057322.2	intron_variant,feature_truncation	MODIFIER	PACRG	protein_coding	INTRON=4/4,STRAND=-1	0	0	7	7
sv_00057	1	5038803	5039100	297	DEL	ATCAAAGACATTCTTTTTTTTTTTTTTTTTTTTTGTCTTTTGTTGTTGTTGTTGTTGCTATTTCTTGGGCCGCTCCCGCGGCATATGGAGGTTCCCAGGCTAGGGGTTGAATCGGAGCTGCAGCCACCGGCCTACACCAGAGCCACAGCAACGCAGGATCCGAGCTGCGTCTGCAACCTACACCACAGCTCACGGCAACGCCGGATCGTTAACCCACTGAGCAAGGGTAGGGACCGAACCCGCAACCTCATGGTTCCTAGTCGGATTCGTTAACCACTGCGCCATGATGGGAACTCCT	A	10	WXP4,XP7	ENSSSCG00000038153	ENSSSCT00000057322.2	intron_variant,feature_truncation	MODIFIER	PACRG	protein_coding	INTRON=4/4,STRAND=-1	1	1	0	2
sv_00058	1	5049951	5050232	281	DEL	TAAGGGGTCCTCTTTTTTTTTTTTTGTCTTTTTTTTGGTTATTTCTTGGGCCGCTCCCACGGCATATGGAGGTTCCCACACTAGGGGTCGAATCGGAGCTGTAGCCACCAGCCTACGCCAGAGCCACAGCAACGCGGGATCCGAGCCCCGTCGGCGACCTACATACACCACAGCTCACGGCAACGCCGGATCGTTAACCCACTGAGCAAGGGCAGGGACTGAACCCGCAACCTCATGGTTCCTAGTCGGATTCGTTAACCACTGCGCCACGACGGGAACTCC	T	4	LA1,DU5	ENSSSCG00000038153	ENSSSCT00000057322.2	intron_variant,feature_truncation	MODIFIER	PACRG	protein_coding	INTRON=4/4,STRAND=-1	0	0	2	2
sv_00059	1	5141369	5141669	300	DEL	AAACATTTTTATCTTTTTTTTTTTTTTTTTTTTTTGTCTTTTGTCTTTGTTGTTGTTGTTGCTATTTCTTGGGCCGCTCCCGCGGCATATGGAGGTTCCCAGGCTAGGGGCTGAATCAGAGCTGTAGCCACCGGCCTACGCCAGAGCCACAGCAACGCAGGATCCGAGCTGCGTCTGCAGCCTACACCACAGTTCACGGCAACGCCGGATCGTTAACCCACTGAGCAAGGGCAGGGACCGAACCCGCAACCTCATGGTTCCTAGTCGGATTCGTTAACCACTGCGCCACGACGGGAACTCC	A	14	WXP6,XP3,XP5,LW4,LW7,LA4,LA5,LA7,DU4,DU5	ENSSSCG00000038153	ENSSSCT00000057322.2	intron_variant,feature_truncation	MODIFIER	PACRG	protein_coding	INTRON=4/4,STRAND=-1	1	2	7	10
sv_00060	1	5272289	5272563	274	DEL	TTATATATTATTTTTTTTTTTTTTTTTTTGTCTTTTGTTGTTGCTATTTCTTGGCCGCTCCCGGCATATGGAGTTCCCAGGCTAGGGTTGAATCGGAGATGCAGCCACCGGCCTACGCCAGAGCACAGCAACGCGGATCCGAGCCGCGTCTGCAACTACACCACAGCTCAGGGCAACACCGGATCGTTTACCCACTGAGCAAGGGCAGGGACCGAACCCGCAACCTCATGGTTCCTAGTCGGATTCGTTAACCACTGCGCCACGACGGGAACTCC	T	10	XP2,XP4,XP6,XP7,LW2,LW7,LA4,LA5,LA7,DU1,DU3,DU5	ENSSSCG00000038153	ENSSSCT00000057322.2	intron_variant,feature_truncation	MODIFIER	PACRG	protein_coding	INTRON=2/4,STRAND=-1	0	4	8	12
sv_00061	1	5365832	5366149	317	DEL	TTGGGATTATTTTATTTTATTTATTTATTTATTTATTTATTTTTGTCTTTTGTCTTTTTGTTGTTGTTGTTGTTGTTGCTATTTCTTGGGCCGCTCCCGCGGCATATGGAGGTTCCCAGGCCAGGGGTTGAATCGGAGCTGTAGCCACCGGCCTACGCCAGAGCCACAGCAACGCGGGATCCGAGCCACGTCTGCAACCTACAGCACAGCTCACGGCAACGCCGGATCCTTAACCCACTGAGCAAGGGCAGGGACCGAACCCGCAACCTCATGGTTCCTAGTCAGATTCGTTAACCACTGCTCCACGACGGGAACTCC	T	8	WXP6,XP3,XP6	ENSSSCG00000038153	ENSSSCT00000057322.2	intron_variant,feature_truncation	MODIFIER	PACRG	protein_coding	INTRON=2/4,STRAND=-1	1	2	0	3
sv_00062	1	5467021	5467199	178	DEL	ATGATTAGAGAATTTTTTTTTTTTTTTTTTTTTTTTTTTTTTGGTCTTTTTAGTGCTGCACCTGTGGCATTTGGAAGTTCCCAGGCTAGGGGTCCAATAGGAGCGGTAGCTGCCGTCCTACACCACAGCCACAGCAGCACTGGATCCCAGCTCACCACAGTGCTGGATCCTTAACCCAC	A	6	LW4,LW5,LW7,LA6	ENSSSCG00000038153	ENSSSCT00000057322.2	upstream_gene_variant	MODIFIER	PACRG	protein_coding	DISTANCE=1955,STRAND=-1	0	0	4	4
sv_00063	1	5479105	5479380	275	DEL	GCTGAAGTAATTTTTTTTTTTTTTTTTTTTTTTTTTTTGTCTTTTGTTGTTGTTGTTGTTGTTGTTGCTATTTTTGGCGCTTCCGGCATATGGAGTTCCAGCTAGGGTCTAATCGGAGCTGTAGCCACTGCCTGCACCAGAACCACAGCACGCAGATCCGAGCCGCATCTGCACCTACACCGCAGCTCACGCACGCCGATCCTACCCACTGAGCAAGGCACCGAACCCGCACCCATGGTCCTAGTCGGATTCTTAACCACTGCCCACGACGGAACT	G	8	XP2,LW7,LA6	ENSSSCG00000004032	ENSSSCT00000069514.1	intron_variant,feature_truncation	MODIFIER	PRKN	protein_coding	INTRON=1/8,STRAND=1	0	1	2	3
sv_00064	1	5511131	5511381	250	DEL	TTGATATTTTTTTTTTTTTTTTTTTTTTTTTTTTTTTTTTTTTTTTTTTTTTTTTTTTTTTTTTGTTGCTATTTCTTCGCTCCCGGCATATGGAGTTCAGTAGTCTAATCGGAGCTGTAGCACGTACGCAGAGCACAGACGGGATCGAGCCGTCTGCAACTACAAAGCTCACGCAACGGATTGTTAACACTGACAAGGCAGGAGAACCGCAACTCATGTTCTAGTCGATTCGTTAACCTGCGCCACGAATC	T	14	WXP6,WXP7,XP2,XP3,XP6,LW4,LW5,LW7,LA5,LA7,DU1,DU4,DU7	ENSSSCG00000004032	ENSSSCT00000069514.1	intron_variant,feature_truncation	MODIFIER	PRKN	protein_coding	INTRON=1/8,STRAND=1	2	3	8	13
sv_00065	1	5599451	5600068	617	DUP:TANDEM	GATTATATATTTTTAAAAAAACATCTATTAGAATGACATAGGTGTAATTACAACATGCATACATAAGAAAGTTAATATGATTCCTGTATTAAGCACCACTTAAAATCCAAGTAGCCAGTGGAAAAATAGGCAAAACCAAGGGCCACTTAGACAAGCAACTTACCCTTAAAATCCCAGTCCCTTTGGCTTGACTTTTTTGGGGAAATGAAGCAAAATCTGATGCTAGCAGGACACAGAAATCAAGATTAATGTTTCTTCTAAACAACTTGAACTTGCATTGGACCATCAGGACAATCCAGATTTTAAAATGAAGTTGAGCTAGCACAGGAGAAAATAGTTTGTGACTATATTAAAAGTGAGAAGACAGTGAAGAAAAATAAAGCATCACTGTTTATCAGA…	GATTATATATTTTTAAAAAAACATCTATTAGAATGACATAGGTGTAATTACAACATGCATACATAAGAAAGTTAATATGATTCCTGTATTAAGCACCACTTAAAATCCAAGTAGCCAGTGGAAAAATAGGCAAAACCAAGGGCCACTTAGACAAGCAACTTACCCTTAAAATCCCAGTCCCTTTGGCTTGACTTTTTTGGGGAAATGAAGCAAAATCTGATGCTAGCAGGACACAGAAATCAAGATTAATGTTTCTTCTAAACAACTTGAACTTGCATTGGACCATCAGGACAATCCAGATTTTAAAATGAAGTTGAGCTAGCACAGGAGAAAATAGTTTGTGACTATATTAAAAGTGAGAAGACAGTGAAGAAAAATAAAGCATCACTGTTTATCAGA…	6	XP1,XP3	ENSSSCG00000004032	ENSSSCT00000069514.1	intron_variant	MODIFIER	PRKN	protein_coding	INTRON=1/8,STRAND=1	0	2	0	2
sv_00066	1	5655988	5656766	778	DEL	CGCATGACTGTTTTCTGTTGTCTTCCTCCTTCAGTTTTTGTTTTTCAGTTTCTCCATCTTTGGAGGAATGATTGACAAATATAATTGTTTATGTGTGTAACTGTGTAATTACATGTAATTATATGTAACTGTAATTGTGTACAGTGCAGTGTATACAGTTGTGTGTGGTTTATGTACACATACATGGCGGGATGATTACCAAGATCAAGGCAACTAACACAACCACCACGTCGCATAGTGAACTCTCTGTGTGTATGTGTGTGTAGGTGTGTGTGTTCCAAGAATGCTGGAGACCTCCCCTCAGCCACTTTCAAGTAGACGGTGCTGTATCATTGGCTGTAGTGACCGAGAAGGTCCTTAGAGCATCTTCTATAACTAAACCCTTTGACCTACGTCTTC…	C	5	WXP2,WXP4,WXP7,XP6	ENSSSCG00000004032	ENSSSCT00000069514.1	intron_variant,feature_truncation	MODIFIER	PRKN	protein_coding	INTRON=1/8,STRAND=1	3	1	0	4
sv_00067	1	5667677	5667994	317	DEL	GAGACTTTTATTTATTTATTTATTTATTTATTTTTTTGTCTTTTTGTCTTTTTTTGTTGTTGTTGTTGTTGTTGTTGCTATTTCTTGGGCCGCTCCCGCGGCATATGGAGGTTCCCAGGCTAGGGGTTGAATCGGAGCTGTAGCCACCGGCCTACGCCAGAGCCACAGCAACGCGGGATCCGAGCCGCGTCTGCAACCTACACCACAGCTCACGGCAACGCCGGACCGTTAACCCACTGAGCAAGGGCAAGGATCGAACCTGCAACCTCATGGTTCCTAGTCGGATTCGTTAACCACTGCGCCACGACGGGAACTCCC	G	13	WXP2,WXP3,WXP5,WXP6,WXP7,XP3,XP6,LW7,DU7	ENSSSCG00000004032	ENSSSCT00000069514.1	intron_variant,feature_truncation	MODIFIER	PRKN	protein_coding	INTRON=1/8,STRAND=1	5	2	2	9
sv_00068	1	5682317	5682617	300	DEL	CAGGTTCTTTTTTTTTTGTTGTTGTTGTTGTTGTTGTTGTTGTTGTTGTTGTTGTTGTTGCTATTTCTTGGGCCGCTCCCGCGGCATATGGAGGTTCCCAGGCTAGGGGTTGAATTGGAGCTGTAGCCACCGGCCTACGCCAGAGCCACAGCAACGCGGGATCCGAGCCGCGTCTGCAACCTACACCACAGCTCACGGCAACGCCGGATCGTTAACCCACTGAGCAAGGGCAGGGACCGAACCCGCAACCTCATGGTTCCTAGTCGGATTCGTTAACCACTGCGCCACGACGGGAACTCCG	C	13	WXP7,XP1,XP3,XP6,LW6,LW7,LA5,LA6,LA7,DU1,DU3,DU7	ENSSSCG00000004032	ENSSSCT00000048870.2	intron_variant,feature_truncation	MODIFIER	PRKN	protein_coding	INTRON=1/11,STRAND=1	1	3	8	12
sv_00069	1	5686655	5686954	299	DEL	CAAAGAAGCACAGCGGAGTTCCCGTCGTGGCGCAGTGGTTAACGAATCCGACTAAGAACCATGAGGTTGCGGGTTCGGTCCCTGCCCTTGCTCAGTGGGTTAAGGATCCGGCGTTGCCGTGAGCTGTGGTGTAGGTTGCAGACGCGGCTCGGATCCCGCGTTGCTGTGGCTCTGGCGTAGGCCGGTGGCTACAGCTCCGATTCGACCCCTAGCCTGGGAACCTCCATATGCCGCGGGAGCGGCCCAAGAAATAGCAACAATAACAACAACAACAAAAAGACAAAAGACAAAAAAAAAAAA	C	10	WXP4,XP2,XP4,XP5,XP6,XP7,LW5,LW7,LA7,DU3	ENSSSCG00000004032	ENSSSCT00000048870.2	intron_variant,feature_truncation	MODIFIER	PRKN	protein_coding	INTRON=1/11,STRAND=1	1	5	4	10
sv_00070	1	5748144	5748441	297	DEL	AAATAATTTCCTTGGAGTTCCCATCGTGGCGCAGTGGTTAACGAATCCGACTAGGAACCATGAGGTTGCGGGTTCGGTCCCTGCCCTTGCTCAGTGGGTTAACGATCCGGCGTTGCCATGAGCTGTGGTGTAGGTTGCAGACAGGGCTCGGATCCCGGTTGCTATGGCTCTGGCGTAGGCCGGTGGCTACAGCTCCGATTCAACCCCTGGCCTGGGAACCTCCATATGCCGCGGGAGCGGCCCAAGAAAATAGCAACAACAACAACAACAACAACAACAAAAAGACAAAAAAAAAATT	A	11	XP3,XP4,XP6,DU7	ENSSSCG00000004032	ENSSSCT00000004459.4	intron_variant,feature_truncation	MODIFIER	PRKN	protein_coding	INTRON=1/9,STRAND=1	0	3	1	4
sv_00071	1	5757148	5757148	58	INS	T	TCTAATACCACGTAAACCTTCAAATATGACTTAGGTGCCTTCAAAACACATGAACATAC	8	WXP6,WXP7,XP3,XP6,DU7	ENSSSCG00000004032	ENSSSCT00000004459.4	intron_variant,feature_elongation	MODIFIER	PRKN	protein_coding	INTRON=1/9,STRAND=1	2	2	1	5
sv_00072	1	5834181	5834475	294	DEL	TAGATAAAACAACTTTTTTTTTTTTTTGTCTTTTGTCTTTTTGTTGTTGTCGTTGCTATTTCTTGGGCCGCTCCCGCGGCATATGGAGGTTCCCAGGCTAGGGGTCCAATCGGAGCTGTAGCCACCGGCCTACACCAGAGCCACAGCAACGCGGGATCCGAGCCGTGTCTGCAACCTACACCACAGCTCACGGCAACGCCGGATCGTTAACCCACTGAGCAAGGGCAGGGACCGAACCCGCAACCTCATGGTTCCTAGTCGGATTCGTTAACCACTGCGCCACGATGGGAACTCC	T	13	XP4,XP7,DU7	ENSSSCG00000004032	ENSSSCT00000004459.4	intron_variant,feature_truncation	MODIFIER	PRKN	protein_coding	INTRON=1/9,STRAND=1	0	2	1	3
sv_00073	1	5862928	5863049	121	DEL	TAAGACATAATACTAAATACTCATGTTGCAACAGAAGAAAGGGTGGGGGAAAAACTGTAATTGTAATGTATACATGTAAGGATAACCTGACCCCCTTGCTGTACAGTGGGAAAAAAAAAAAA	T	8	LW6,LW7	ENSSSCG00000004032	ENSSSCT00000004459.4	intron_variant,feature_truncation	MODIFIER	PRKN	protein_coding	INTRON=2/9,STRAND=1	0	0	2	2
sv_00074	1	5946709	5946794	85	DUP:TANDEM	CCAGTTCAGTTCAGTGGGTTAAAGGATCCGGCGTTGCCTTAGCTATGGCATAGGTTGAAGCTGTGCCTCAGATTCAATCCCAGGAA	CCAGTTCAGTTCAGTGGGTTAAAGGATCCGGCGTTGCCTTAGCTATGGCATAGGTTGAAGCTGTGCCTCAGATTCAATCCCAGGAACAGTTCAGTTCAGTGGGTTAAAGGATCCGGCGTTGCCTTAGCTATGGCATAGGTTGAAGCTGTGCCTCAGATTCAATCCCAGGAA	8	LW1,LW4,LW6,LW7,LA1,LA2,LA7,DU1,DU3,DU6	ENSSSCG00000004032	ENSSSCT00000004459.4	intron_variant	MODIFIER	PRKN	protein_coding	INTRON=3/9,STRAND=1	0	0	10	10
sv_00075	1	5994208	5994350	142	DEL	GTGTCTGGGTCCAGTCATTGTACTCTCTCTAGTCTGAAACTTCTCCCAGCCCCCCCCCCCCGCCCGGACCCTGAAGTGTTCTATGCAGCCAGTACTTGAAGCTCTCTCCAGTATGCAAATTATAAAACAGACAAACAAAACTA	G	12	LW6,LW7	ENSSSCG00000004032	ENSSSCT00000004459.4	intron_variant,feature_truncation	MODIFIER	PRKN	protein_coding	INTRON=3/9,STRAND=1	0	0	2	2
sv_00076	1	5996094	5996403	309	DEL	GAAGAATTGGCTGTTGTTGGAGTTCCCGTCGTGGCGCAGTGGTTAACGAATCCGACTAGGAACCATGAGGTTGCGGGTTCGATCCCTGCCCTTGCTCAGTGGGTTAACGATCCGGCGTTGCCGTGAGCTGTGGTGTAGGTTGCAGACGCGGCTCGGATCCAGCGTTGCTGTGGCTCTGGCGTAGGCCGGTGGCTACAGCTCCGATTCAACCCCTAGCCTGGGAACCTCTATATGCCGCGGGAGCGGCCCAAGAAATAGCAACAATAACAACAACAACAACAACAAAAAAGACAAAAGACAAAAAAAAAAA	G	17	WXP7,XP1,XP3,XP4,XP6,XP7,LW6,DU7	ENSSSCG00000004032	ENSSSCT00000004459.4	intron_variant,feature_truncation	MODIFIER	PRKN	protein_coding	INTRON=3/9,STRAND=1	1	5	2	8
sv_00077	1	6000520	6000770	250	DEL	TCTTTATGTCTGTTAAGTCTGCTTCTGTTTTTATATTCATCAATTTGTTTTAATTTTTAGATTCCACATATATCATACAGTATTTGTCTTTATCTGACTTATTTAACATAATGCCTCCAAGTCTACCCATGTTACTGCAAATGGTAAAATTTCATTTTTTATGGTTGAGTAGTATCCACTGTGTGTGTGTGTATTATACGTATGTACATATATGTATGCATATACATATGCATATATGCATACCACATTTC	T	10	WXP2,WXP7	ENSSSCG00000004032	ENSSSCT00000004459.4	intron_variant,feature_truncation	MODIFIER	PRKN	protein_coding	INTRON=3/9,STRAND=1	2	0	0	2
sv_00078	1	6119407	6119684	277	DEL	TGGTTTTCAAGCCAGCTTGGTCCCTGCCATGGGCCCCTGTGTGTCTTCCTCTCAACCGTCTCCTAAATGCACCCTCTGGTCTAGGGCCCATAGTTCATCTTTGCTTTGTGGCTGCTGTTAATGTCACTTGCCTTTATTTGGGGTATGCTATTTTCAAAGAGTGTATGCCCTTTGTAACAAGAAATATATAAAGAAAATAAATTAATGGTTTTCTCCATTCTCCCAGTTTCATTCCCCCAAGAAGATTACCGTGAGCTTTTTTTCTGTGTACTTTTCTA	T	4	WXP5,LW5,LA7,DU5	ENSSSCG00000004032	ENSSSCT00000004459.4	intron_variant,feature_truncation	MODIFIER	PRKN	protein_coding	INTRON=4/9,STRAND=1	1	0	3	4
sv_00079	1	6138924	6143056	4132	DEL	TGCCAAAGTGAATTAATGAATAAAGTCGAAGAATTTTTTTTGTTCCAAACTTTTAAGCAAAGACAGCTTATAATCATTTAAGCGATATCTCCCTTTGGCCTTTGGGACTGTACTCCATGGCCTTTTATTTCATTTTATTTTATTTTTGTTGTTGTTGTTGTTTAGGGCCTCACCCACAGTATATGGAGGTTCCCAGGCTAAGGGCTGAATGGGAGCTGTAGCTGCTGGCCTACACCACAGCCGCAGCAATGCAATATCCGAGCCGTGTCTTCAACCTACACCACAGCTCATGGCAAAGCCAGATCCTTAACCCACTAAGCAAGGCCAGGGATCGAACCTGCATCCTCATGGATGCTAGTAAGATTTGCTTCCGCTGAACCATGATGGGAACTCTACATG…	T	4	XP2,LW4,DU5	ENSSSCG00000004032	ENSSSCT00000004459.4	intron_variant,feature_truncation	MODIFIER	PRKN	protein_coding	INTRON=5/9,STRAND=1	0	1	2	3
sv_00080	1	6286876	6288377	1501	DEL	CACGACCACAGAGTGACTGGTGATGGAGAGAGGAGCGTGATGAATAGGAGAGTCAGGGTGTTATTTTAGGAGAATGAAATGGAAAACAATGCACGTGAAGTTCCTAGCAAGGTCCCTCATGCAAAGTCGATGTTCATAAATACTAGTATTTCTCCCTTTCCTCTTTTATCTAGCACTTGGGGAATTAATTGTATAGTCCCTCTGGCTATGAAAACCAAAAAACAAACAAAAAAAAAACCTTTCAATGGGTGTCATGTGTGTCACTCACCTAACATTTTGTAAATACTAAGAATATTCTCAAGAGATGAACAGTCTTACCTCATAACCATTCCAGTTATTGTATTTGACATCTCTGCTTGCTCAATCTTTATATCTTCTATTTCTTTGTTCATTGTTTCT…	C	6	XP2,XP3,XP6	ENSSSCG00000004032	ENSSSCT00000004459.4	intron_variant,feature_truncation	MODIFIER	PRKN	protein_coding	INTRON=5/9,STRAND=1	0	3	0	3
sv_00081	1	6375843	6376132	289	DEL	TGAGAAGTGGGCTTTTATCTTTTTTTTTCTTTTTTTTCTTTTTTTTTTGCTATTTCTTTGGGCCGCTCCCGCGGCATATGGAGGTTCCCAGGCTAGGGGTCCAATCGGAGCTGTAGCCACCGGCCTACGCCAGAGCCACAACAACGCGGGATCCGAGCCACATCTGCAACCTACACCACAGCTCACGGCAACGCCGGATCCTTAACCCACTGAGCAAGGCCAGGGATCGAACCCACAACCTCATGGTTCCTAGTCGGATTCGTTAACCACTGCGCCACGACGGAAACTCC	T	11	WXP2,XP2	ENSSSCG00000004032	ENSSSCT00000004459.4	intron_variant,feature_truncation	MODIFIER	PRKN	protein_coding	INTRON=6/9,STRAND=1	1	1	0	2
sv_00082	1	6423940	6424159	219	DEL	GAACAGGAGTTCCCATCGTGGCGCAGTGGTTAACGAATCCGACTAGGAACCATGAGGTTGCAGGTTCGATCCCTGCCCTTGCTCAGTGGGTTAACGATCCGGCGTTGCCGTGAGCTGTGGTGTAGGTTGCAGACGCGGCTCGGATCGGTTCAGCGTAGCTACAGCTGATCAAGCTGGAATCATAGCGTGGAAAAAAAAAAAAAAAAAAAAAAAAAAAAAA	G	8	XP7,DU1	ENSSSCG00000004032	ENSSSCT00000004459.4	intron_variant,feature_truncation	MODIFIER	PRKN	protein_coding	INTRON=6/9,STRAND=1	0	1	1	2
sv_00083	1	6530568	6530854	286	DEL	TTAAAACTGGAAAACAGGAGTTCCCGTCGTGGCACAGTGGTTAACGAATCCGACTAGGAACCATGAGGTTGCGGGTTCGGTCCCTGCCCCTTGCTCAGTGGGTTAAAGATCCGGCGTTGTCGTGAGCTGTGGTGTAGGTTGCAGACACGGCTCGGATCCCGCATTGCTGTGGCTCTGGTGTAGGCCGGTGGCTACAGCTCCGATTTGACCCCTAGCCTGGGAACCTCCATATGCCGCGGGAGCGGCCCAAGAAATAACTAAAAAAGACCAAAAAAAAAAGAAAACTC	T	14	WXP1,WXP5,XP1,XP2,XP3,XP6	ENSSSCG00000004032	ENSSSCT00000004459.4	intron_variant,feature_truncation	MODIFIER	PRKN	protein_coding	INTRON=7/9,STRAND=1	2	4	0	6
sv_00084	1	6547791	6548518	727	DEL	ACTCCTACGTTAAGATCATTCAGACAAGATAACCCTTGTTAACAGAGAAATAATCATTCAAACAGAGCAAAGCAGGGTTCCTGCCTTCTAAGGTAAACCCCTTACATAACGAACGACACCTCCAGCAAACCACACGTCGTGCTCCCCGGGTGCACAGCGTGAGGTTTAAGGAAGGCCTTGTTGATTTGGCTTTGTTGTTGTTGCCGTGGTGGTGGTTTCATTTCCAAGACGCACCGTCTAGCCTCCTACCCTCACAGACAACTTTTCCCATTCACTCAAGCTGAAGAGTCACCTCTCCTCAGGAGGTAGTTTTACCATCTCCTGGGGCAGCATTTAATGACCTGTACCAGCAAGACGCTGCTCCATGTCAAACCTCAGGCCTTTCTTGCTGGAATCTAA…	A	6	XP1,XP2,XP5,LA4,LA5	ENSSSCG00000004032	ENSSSCT00000004459.4	intron_variant,feature_truncation	MODIFIER	PRKN	protein_coding	INTRON=7/9,STRAND=1	0	3	2	5
sv_00085	1	6594006	6596037	2031	DEL	TTGTTTGTTTGTTTGGTAGGAGACCTAAATACCCCCCTCACATCAATGGACAGATCCTCTAGACAGAAAACCAATAAAGCAACAGAGATCCTAAAGGAAACAATAGAAAAGTTAGACTTAATTGATATCTTCAGGACACTACATCCAAAAAAAGCAGAATACACATTCTTCTCAAATGCTCATGGAACATTCTCAAGAATCGACCACATATTGGGACACAAAGCGAATCTCAATAAATTTAGGAGCGTTGAAATTATCTCAAGTATCTTCTCTGACCACAATGCCATGGAATTAGAAATCAACCATGGGAAAAGCAAAGAGAAAAAACCTACTCCATGGAGACTAAACAACATGCTACTAAAAAACCAATGGGTCAATGAGGAAATCAAGAAGGAAATT…	T	5	XP3,XP6,LW1,LW2,LW3,DU5	ENSSSCG00000004032	ENSSSCT00000004459.4	intron_variant,feature_truncation	MODIFIER	PRKN	protein_coding	INTRON=7/9,STRAND=1	0	2	4	6
sv_00086	1	6608337	6608478	141	DEL	CAGAAATGCGGATCTATCAATGTATACATCTAAGGATGACTTGACCCCCTTGCTGTACAGTGGGAAAATAATAATAAAAAAATAAATTAATTAATTAAAAAAAAAATTAAAAAAAGAAGACTAAAAAAAAAAAAAAAAAAAA	C	10	XP2,XP6,XP7,LW1,LW2,LW6,LW7,LA1,LA2,LA3,LA5,LA7,DU6	ENSSSCG00000004032	ENSSSCT00000004459.4	intron_variant,feature_truncation	MODIFIER	PRKN	protein_coding	INTRON=7/9,STRAND=1	0	3	10	13
sv_00087	1	6667325	6667428	103	DEL	TGGACTGAGTACTGAGTGTCTTAGCCCAGTGGACTGAGTACTGAGTGTCTTAGCTCAGTGGACAGCAAGACTGAGTACTGAGAGTCCTAGCCCAGTGGATGGCG	T	4	XP1,XP6	ENSSSCG00000004032	ENSSSCT00000004459.4	intron_variant,feature_truncation	MODIFIER	PRKN	protein_coding	INTRON=7/9,STRAND=1	0	2	0	2
sv_00088	1	6714198	6715755	1557	DEL	CACGGCCCCTTCTTTTTTTTTTTTTTTTATTTTCCCACTGTACAGCAAGGGGGTCAGGTTATCCTTACATGTATACATTGCAATTACAGTTTTTTCCCCCACCCTTTCTTCTGTTGCAACATGAGTATCTAGACATAGTTCTCAATGCTATTCAGCAGGATCTCCTTGTAAATCTATTCTAAGTTGTGTCTGATAAGCCCAAGCTCCCGATCCCTCCCACTCCCTCCCCTCCCATCAGGCAACCACGAGTCTCTTCTCCAAGTCCATGATTTTCTTTTCTGAGGAGATGTTCGTTTATGCTGGATATTAGATTCCAGTTATAAGTGATATCATATGGTATTTGCCTTTGTCTTTCTGGCTCATTTCACTCAGTATGAGATTCTCTAGCTCCATCCATGT…	C	10	XP3,XP6,DU5	ENSSSCG00000004032	ENSSSCT00000004459.4	intron_variant,feature_truncation	MODIFIER	PRKN	protein_coding	INTRON=8/9,STRAND=1	0	2	1	3
sv_00089	1	6754966	6755183	217	DEL	AGGATGGTGTGGGAGGATGGATCTGGGTGGAGGGAGGGATGGATTGGGAGGGGATGGGGGGGGGGGGGGGGGGGGGGGGGGGGGGGGGGGGGGGGGGGGGGGGGGGGGGGGGGGGGGGGGGGGGGGGAGGGGGGGGGGGGGGGGGGGGGGGGGGGGGGGGGGGGGGGGGGGGGGGGGGATGGTGGGTGGGATGGATGTTGGTGGGTGAGGATGGATAG	A	15	WXP6,WXP7,XP1,XP2,XP5,DU5,DU7	-	-	intergenic_variant	MODIFIER	-	-	-	2	3	2	7
sv_00090	1	6760286	6760578	292	DEL	AAAAGCCTTTGGGGGAGTTCCCGTCGTGGCGCAGTGGTTAACGAATCCGACTAGGAACCATGAGGTTGCGGGTTCGGTCCCTGCCCTTGCTCAGTGGGTTAACGATCCGGCGTTGCCGTGAGCTGTGGTGTAGGTTGCAGACGCGGCTCGGATCCCGCGTTGCTGTGGCTCTGACGTAGGCCAGTGGCTACAGCTCCGACTCAACCCCTAGCCTGGGAACCTCCTTATGCCACGGGAGCGGCCCAAGAAATAGCAACAACAACAAAAAATAAATAAATAAATAAATAAAAAAT	A	10	WXP6,WXP7,XP1,XP2,XP4,XP7,LW5,LA6,DU2	-	-	intergenic_variant	MODIFIER	-	-	-	2	4	3	9
sv_00091	1	6845710	6845993	283	DEL	AGCCATTGACTTTTTTTTTGTTGTTGTTGTTGTTGTTGCTGCTGCTATTTCTTGGGCCGCTCCCGCGGCATATGGAGGTTCCCAGGCTAGGGGTTGAATCGGAGCTGCAGCCACCGGCCTGCGCCAGAGCCACAGCAACGCAGGATCCGAGCTGCATCTGCAACCTACACCACAGCTCACGGCAACGCCGGATCCTTAACCCACTGAGCAAGGGCAGGGACCGAACCCGCAACCTCATGGTTCCTAGTCGGATTCGTTAACCACTGCGCCACGACGGGAACTCC	A	18	WXP2,WXP3,WXP4,WXP5,WXP6,WXP7,XP1,XP2,XP3,XP4,XP5,XP6,XP7,LW1,LW3,LW5,DU5,DU6,DU7	ENSSSCG00000004033	ENSSSCT00000004461.4	intron_variant,feature_truncation	MODIFIER	AGPAT4	protein_coding	INTRON=2/7,STRAND=1	6	7	6	19
sv_00092	1	6855072	6855148	76	DEL	CTTTTTTTTTTTTTTTTTTTTTGTGTGTGTGTGTGTCTTTTTGCCATTTCTTGGGCCACTCCCGCGGCATCCCTTTT	C	5	WXP2,XP7	ENSSSCG00000004033	ENSSSCT00000004461.4	intron_variant,feature_truncation	MODIFIER	AGPAT4	protein_coding	INTRON=2/7,STRAND=1	1	1	0	2
sv_00093	1	6857167	6857250	83	DEL	AGTGGACACTGGCTAGTGTGCTGCTCATGTCTTTCCTGGCCGATGTCTCTGTCCCTTCATTATTTCTCTGGTCGTCACTGCTGT	A	4	WXP3,WXP4	ENSSSCG00000004033	ENSSSCT00000004461.4	intron_variant,feature_truncation	MODIFIER	AGPAT4	protein_coding	INTRON=2/7,STRAND=1	2	0	0	2
sv_00094	1	6885600	6885667	67	DEL	TTTAACCCACTGTGCCCAGGCAGGAGCCAACCTGCATCTCAGCAACCTGAGCCCCAGCAGTGGGATTC	T	13	WXP3,WXP4,WXP5,WXP6,XP2,XP6,XP7,LW5	ENSSSCG00000004033	ENSSSCT00000004461.4	downstream_gene_variant	MODIFIER	AGPAT4	protein_coding	DISTANCE=2325,STRAND=1	4	3	1	8
sv_00095	1	6916784	6917070	286	DEL	ATAAATCTTTTTTTTTTTTTTTTTTTTTTTTTTTTTGTCTTTTTGCTATTTCTTGGGCCGCTCCCGCGGCATATGGAGGTTCCCAGGCTAGGGGGTCTAATCGGAGCTGTAGCCACCAGCCTACGCCAGAGCCACAGCAACGCAGGATTCGAGCCGCGTCTGTGACCTACACCACAGCTCACGACAACGCCAGATCATTAACCCACTGAGCAAGGGCAGGGATCGAACCCGCAACCTCATGGTTCCCAGTCGGATTCGTTAACCACTGCACCACGACGGGAACTCCG	A	10	WXP5,XP6,LA4,LA5,LA6,LA7	ENSSSCG00000004037	ENSSSCT00000004465.4	intron_variant,feature_truncation	MODIFIER	MAP3K4	protein_coding	INTRON=11/25,STRAND=-1	1	1	4	6
sv_00096	1	6941110	6941427	317	DEL	TAAGCCTCGGGAGTTCCCGTTGTGGCGCAGTGGTTAACGAATCCGACTAGGAACCATGAGGTTGAGGGTTCGGTCCCTGCCCTTGCTCAGTGGGTTAACGATCCGGCGTTGCCGTGAGCTGTGGTGTAGGTTGCAGACGCGGCTCGGATCCCGCGTTGCTGTGCCTCTGGCGTAGGCCGGTGGCTACAGCTCCGATTCAACCCCTAGCCTGGGAACCTCCATATGCAGCGGGAGCGGCCCAAGAAATAGCAACAACAACAACAACAGCAAAAAGACAAAAGACAAAAGACAAAAGACAAAAAAAAAAAAAAAAAAAAA	T	16	WXP4,WXP7,XP1,XP2,XP3,XP4,XP5,XP6,XP7,LW3,LW4,LA1,LA5,LA6,LA7,DU1,DU6,DU7	ENSSSCG00000004037	ENSSSCT00000004465.4	intron_variant,feature_truncation	MODIFIER	MAP3K4	protein_coding	INTRON=3/25,STRAND=-1	2	7	9	18
sv_00097	1	7158582	7159415	833	DEL	AGAGCACATAACCATCCCCAAGATCCTGTGCCCGCAGTGGTAGCTAGGACGCTAGAGTACGTTCCCTAGATAGACTGAAATTTGATTCAAACTTGACTTTCAAACGGAGAGCATCTGTCTAACTGCTGAAAACTAGAGTTCAAGTGTCACAGAAGCCCCTGGATCCACAGCTCACGATCTTATACCATCACCGCCATGTAGAGTGTTTGGGTACCTCTCTGTTGAAATGATCTCTAGCTTGCTCATGAATTTGAAGTGGGTCAGTGGGTCTACCAGAGCAGCGCTGAACCAGACGCTCATAGAACGTAGCTGTTCTCGGAAATCACCCATTGTCGTGGTGACACACGACGACACGCCTGGTTAACGCGCATCTTCTTTCGCAAGCCATTGGCACACGCT…	A	4	XP3,XP6	ENSSSCG00000004039	ENSSSCT00000004467.4	intron_variant,feature_truncation	MODIFIER	SLC22A3	protein_coding	INTRON=5/10,STRAND=-1	0	2	0	2
sv_00098	1	7161757	7162049	292	DEL	TACAACACAGGACTCTTTTTTTTTTTTTTTTTTTTTTTTTTTTGTCTTTTTGCTATTTCTTGGGCCGCTCCCGCGGCATATGGAGTTTTCCCAGGCTAGGGGTCTAATCGTAGCTGCAGCCGCCAGCCTATGCCAGAGCCACAGCAACGCGGGATCCGAGCCGCGTCTGCAACCTACACCACAGCTCACGGCAATGCCGGATCGTTAACCCACTGAGCAAGGGCAGGGATCGAACCCGCAACCTCATGGTTCCTAGTCAGATTCGTTAACCACTGCACCACGACAGGAACTCC	T	14	XP2,XP4,LW4,LW5,LW7,LA4,LA5,LA6,LA7,DU2,DU3,DU5,DU7	ENSSSCG00000004039	ENSSSCT00000004467.4	intron_variant,feature_truncation	MODIFIER	SLC22A3	protein_coding	INTRON=3/10,STRAND=-1	0	2	11	13
sv_00099	1	7182492	7182806	314	DEL	TCCCTTGTTGCATTTTATTTTATTTTATTTTATTTTTTTGTCTTTTGTCTTTTGTTGTTGTTGTTGTTGTTGTTGCTATTTCTTGGGCCGCTCCCGCGGCATATGGAGGTTCCCAGGCTAGGGGTTGAATCAGAGCTGTAGCCACCGGCCTACGCCAGAGCCACAGCAACGCGGGATCCGAGCCGCGTCTGCAACCTACACCACAGCTCACGGCAACGCCGGACCGTTAACCCACTGAGCAAGGGCAGGGACCGAACCCGCAATCTCATGGTTCCTAGTCGGATTCGTTAACCACTGCGCCACGACGGGAACTCC	T	8	WXP4,WXP7,XP2,XP4,XP5,LW6,LA4,LA5,LA6,LA7	ENSSSCG00000004039	ENSSSCT00000004467.4	intron_variant,feature_truncation	MODIFIER	SLC22A3	protein_coding	INTRON=1/10,STRAND=-1	2	3	5	10
sv_00100	1	7285152	7285252	100	DUP:TANDEM	AAGAACAATGTCATGAGGGTGGAAGATTCTGGAAGAGGAATCAGCGATGCCCACTGGAACAGCGGGCTCCCCGGCACAGGAAGCATCAGTGGATGACCTGG	AAGAACAATGTCATGAGGGTGGAAGATTCTGGAAGAGGAATCAGCGATGCCCACTGGAACAGCGGGCTCCCCGGCACAGGAAGCATCAGTGGATGACCTGGAGAACAATGTCATGAGGGTGGAAGATTCTGGAAGAGGAATCAGCGATGCCCACTGGAACAGCGGGCTCCCCGGCACAGGAAGCATCAGTGGATGACCTGG	4	WXP2,WXP6,WXP7,LW6,LW7	ENSSSCG00000004040	ENSSSCT00000004468.4	upstream_gene_variant	MODIFIER	SLC22A2	protein_coding	DISTANCE=4579,STRAND=1	3	0	2	5
sv_00101	1	7285152	7285152	100	INS	A	AAGAACAATGTCAAGAGGGTGGAAGATTCTGGAAGAGGAATCAGCGATGCCCACTGGAACAGTGGGCTCCCCAGCACAGGAAGCATCAGTGGATGACCTGG	4	XP2,LW5	ENSSSCG00000004040	ENSSSCT00000004468.4	upstream_gene_variant	MODIFIER	SLC22A2	protein_coding	DISTANCE=4679,STRAND=1	0	1	1	2
sv_00102	1	7304136	7306245	2109	DEL	CTCTGCCCATTTTTTTTATTATTTTCCCACTGTACAGCAAGGGGATCAAGTTATCCTTACATGTATACATTACAATTACATTTTTTCCCCACCCTTTGTTCTGTTGCAATATGAGTATCTAGACAAAGTTCTCAATGCTATTCAGCAGGATCTCCTTGTAAATCCATTCCAAGTTGTGTCTGATAAGCCCAAGCTCCCGATCCCTCCCACTCCCTCCCCCTCCCATCAGGCAGCCACAAGTCTCTTCTCCAAGTCCATGATTTTCTTTTCTGAGGAGATGTTCATTTGTGCTAGATATTAGATTCCAGTTATAAGTGATATCATATGGTATTTGTCTTTGTCTTTCTGGCTCATTTCACTCAGGATGAGATTCTCTAGTTCCATCCATGTTGCTGCAAA…	C	7	XP6,DU5	ENSSSCG00000004040	ENSSSCT00000004468.4	intron_variant,feature_truncation	MODIFIER	SLC22A2	protein_coding	INTRON=4/10,STRAND=1	0	1	1	2
sv_00103	1	7483035	7483320	285	DEL	GCTGGTCCTCCCTTGGTTTTTGTTTTTTTTTTTTTTTTGTCTTTTTGCCTTTTCTAGGACCGCTGTGGTGGCATATGGAGGTTCCCAGGCTAGGGGTCAAATTGGAGCTGTAGCCACCGGCCTACGCCACAGCCACAGCAATGCAGGATCCGAGTCACATCTGCGACCTACACCACAGCTCACGGCAACGCTGGATCCTTAACCCACTGATGGAGGCCAAGGATTGAACCCACAACCCCATGGTTCCTAGTCGAATTAGTTAACCACTGAGCCATAACGGGAACTC	G	7	WXP2,WXP3,WXP5,WXP6,XP1,XP3,XP4,XP6,DU4	-	-	intergenic_variant	MODIFIER	-	-	-	4	4	1	9
sv_00104	1	7530238	7530537	299	DEL	TGAAAGACCTTTTTCTGGAGTTCCCGTCGTGGCGCAGTGGTTAACGAATCCGACTAGGAACCATGAGGTTGCGGGTTCGGTCCCTGCCCTTGCTCAGTGGGTTAATGATCCGGCGTTGCCGTGAGCTGTGGTGTAGGCCGCAGACGCAGCTCGGATCCCGCGTTGCTGTGGCTCTGGCGTAGGCCGGTGGCTGCAGCTCCGATTCAACCCCTGGCCTGGGAACCTCCATATGCCCCGGGAGCGGCCCAAGAAAGAGCAACAACAACAGCAGCAAAAGACAAAAGACAAAAGAAAAAAAAA	T	7	WXP5,WXP6,XP3,XP6,LW4,LW5,DU4,DU5,DU7	ENSSSCG00000004045	ENSSSCT00000004473.3	upstream_gene_variant	MODIFIER	MAS1	protein_coding	DISTANCE=1415,STRAND=-1	2	2	5	9
sv_00105	1	7608754	7609077	323	DEL	AAAATAAAATAAAATAAGGAGTTCCCCTCGTGGCTAAGTGGTTAACGAACCCGACTAGGAACCATGAGGTTGCGGGTTCAACCCCTGGCCTTGCTCAGTGGGTTAAGGATCTGGCGTTGCTGTGGCCCTGGTGTAGGCAGGCGGCTACAGCTCTGATTAGACCCCAAGCCTGGGAACCTCCATATGCAGGGGGAAGCAGCCCCAGAAAAGGCAAAAAGACAAAAATAAATAAATAAAAATTAAAAAAATATAAATGAGTGAATCCTAAGGGTTCTCAGCACAAGAAAAAAAATTTTTTCTATAAAAAAAAATAAATAAATAAAT	A	9	WXP6,WXP7,XP1,XP2,XP3,XP4,LW4	ENSSSCG00000004049	ENSSSCT00000004477.4	intron_variant,feature_truncation	MODIFIER	ACAT2	protein_coding	INTRON=2/8,STRAND=-1	2	4	1	7
sv_00106	1	7613812	7614097	285	DEL	GGGGAACTCCAGTCTTTTGTTGTTGTTGTTGTTGTTGTTATTGTTGCTATTTCTTGGGCCGATCTCGCGGCATATGGAGGTTCCCAGGCTAAGGGTCGAATCGGAGCTGTAGCCACCGGCCTATGCCAGGGCCACAGCAACGCGGGATCCGAGCCGCGTCTGCAACCTACACCACAGCTCACGGCAACGCCGGATCGTTAACCCACTGAGCAAGGGCAGGGACCGAACCCGCAACCTCATGGTTCCTAGTCGGATTCGTTAACCACTGCGCCACGACGGGAACTCC	G	15	WXP1,WXP3,WXP4,WXP6,WXP7,XP2,XP3,XP4,XP5,XP6,XP7,LW4,LA4,LA5,DU1,DU7	ENSSSCG00000004049	ENSSSCT00000004477.4	upstream_gene_variant	MODIFIER	ACAT2	protein_coding	DISTANCE=1477,STRAND=-1	5	6	5	16
sv_00107	1	7614671	7614757	86	DEL	GCCTCGGGAACGGCCCTAGAAAAGGCAAAAAGACAAAAAAAAAAAAAAAAAAAGAATAGATGATATTTTGCACGGCTCTCCATGAAC	G	6	XP2,XP6	ENSSSCG00000004049	ENSSSCT00000004477.4	upstream_gene_variant	MODIFIER	ACAT2	protein_coding	DISTANCE=2336,STRAND=-1	0	2	0	2
sv_00108	1	7615562	7615860	298	DEL	TCAGAAAAAAAGGCGGAGTTCCCGTCGTGGCGCAGTGGTTAACGAATCCGACTAGGAACCATGAGGTTGCGGGTTCGGTCCCTGCCCTTGCTCAGTGGGTTAACGATCCGGCGTTGCCGTGAGCTGTGGTGTAGGTTGCAGACGCGGCTCGGATCCCGAGTTGCTGTGGCTCTGGCGTAGGCCGGTGACTACAGCTCCGATTCGACCCCTGGCCTGGGAACCTCCATATGCCGCGGGAGCGGCCCAAGAAATAGCAACACCAACAACAACAACAACAAAGACAAAAAAAAGACAAAAA	T	7	WXP6,WXP7,XP2,XP3,XP4,XP6,XP7,LW5,LA5	ENSSSCG00000004049	ENSSSCT00000004477.4	upstream_gene_variant	MODIFIER	ACAT2	protein_coding	DISTANCE=3227,STRAND=-1	2	5	2	9
sv_00109	1	7663330	7664146	816	DEL	GATCAAGACGATGAGGTGCATACGTGTACCATGATGCGCTACTCAGCCGTAACGAAGGAGATGATGCCGTTTGCGGCGTTTGTGCGTGAACCTAGAGATGACTTTACTGAGTGGAGTAAGTCAGGCAGAGGAAGACAAATGTTACACCACCTCCCTATGTGTGGAATCTAAAAAAAGACACAAAAGAACTCATTTACAAAACAGGAATACACTCACAGACATATAAAACAGATTGATGGCTATCAAAGGGGGAAGGGAGGGTGGAGGTATTTGGGAGTTTGGGATTAACATGTGCACACCACCTACCATCTATAAAATAAGTAACCAGCAAGGACCTACTGCATAGCACAGGGAACTATACTCAATGTCTCATAATCTTCTATTAGGGAAAGGAACCTG…	G	16	WXP2,WXP3,WXP4,XP4	ENSSSCG00000040317	ENSSSCT00000039602.2	intron_variant,feature_truncation	MODIFIER	SOD2	protein_coding	INTRON=1/3,STRAND=1	3	1	0	4
sv_00110	1	7752649	7752931	282	DEL	TTAAAAGTAATAAGGAGTTCCCGGCGTGGCGCAGTGGTTAACGAATCTGACTAAGGAACCATGAGGTTGCGGGTTCGGTCCCTGCCCTTGCTCAGTGGGTTAACGATCTGGCGTTGCTGTGAGCTGTGGTGTAGGTTGCAGACTCGGCTCGGATCCCGCGTTGCTGTGGCTCTGGCGTAGGCCTGTGGCTACAGCTCCGATTCAACCCCTAGCCTGGGAACCTCCATATGCAGCGGGAGCGGCCCAAAGAAATAGCAAAAAAAAGACCAAAAAAATAAATAAA	T	3	XP3,XP5,XP6,LA4	-	-	intergenic_variant	MODIFIER	-	-	-	0	3	1	4
sv_00111	1	7840199	7840484	285	DEL	TAAAGAACACTTGTCCTTGGAGTTCCCGTTGTGGCGCAGTGGTTAATGAATCCGACTAGGAACCATGAGGTTGCGGGTTCGGTCCCTGCCCTTGCTCAGTGGGTTAACGATCCGGCATTGCCATGAGCTGTGGTGTAGGTTGCAGACGCGGCTCTGATCCCGCATTGCTGTGGCTCTGGCGTAGGCCGGTGGCTACAGCTCCAATTCCACCCCTAGCCTGGGAACCTCCATATGCCGCGGGAGCGGCCCAAGAAATAGCAACAACAACAACAACAACAAAAAAAAA	T	12	WXP2,WXP5,WXP6,WXP7,XP1,XP2,XP3,XP4,XP6,XP7,LW6,LW7,LA6,DU1,DU3,DU4,DU7	-	-	intergenic_variant	MODIFIER	-	-	-	4	6	7	17
sv_00112	1	7897318	7897429	111	DEL	GCAGATGCAGAGGAAGGACTCTTCCTGCGGGGTCATGCCCACCTCCAGCTCAATAAACCTCAGCCGGAGGCAGGTGGGGGTGTTCCCATAGGGAGGAGGAAAGGCAAAGTGC	G	4	XP2,XP4,LA4	-	-	intergenic_variant	MODIFIER	-	-	-	0	2	1	3
sv_00113	1	8086808	8086880	72	DEL	AACACACAAACACACACACACACACACACACACACACACACACACACACACACACACACACACACACACACAC	A	6	WXP2,WXP7	ENSSSCG00000004052	ENSSSCT00000066410.2	upstream_gene_variant	MODIFIER	FNDC1	protein_coding	DISTANCE=4991,STRAND=-1	2	0	0	2
sv_00114	1	8215739	8215889	150	DEL	ACTCTAACGTAATAGGGTTTTTTAAAATTCTCAAATTAGGAATGCATATCTCAAAAATAATCGCAGCAGAGAGGATTTGTTACCGACTTTCTGGATGCTCCTTTCAGACCCATAAGGATCTCTGCAGCTCATTTGGGCGCCTCCCTGATGC	A	14	WXP1,WXP3,WXP4,WXP5,WXP7	ENSSSCG00000004053	ENSSSCT00000004481.4	intron_variant,feature_truncation	MODIFIER	TAGAP	protein_coding	INTRON=8/9,STRAND=1	5	0	0	5
sv_00115	1	8276075	8276075	104	INS	C	CGATGAATATATACCCATGGCATATCCGAACAATGAGATTTTATTTAGCACTAAATGAATATATACCCATGGCATATCCGAACAATGAGATTTTATTTAGCACTA	8	WXP4,WXP6,XP3,XP4,XP5,XP6,LA6,LA7	-	-	intergenic_variant	MODIFIER	-	-	-	2	4	2	8
sv_00116	1	8296291	8296405	114	DEL	ACCTCATTGTAGTTTTTTTTTTTTTTTTTTTTTTCCCACTGTACAGCAAGGGGGTCAGGTTATCCTTACATGTATACATTACAATTACAGTTTTCCCCCCACCCTTTCTTCTGTT	A	17	WXP2,WXP3,WXP4,WXP5,WXP7,XP5	-	-	intergenic_variant	MODIFIER	-	-	-	5	1	0	6
sv_00117	1	8485526	8485838	312	DEL	AGGAACTCCTAGAATTCTCTTTATTTTTTTATTTATTTATTTTTTTTTTTTGTCTTTTTGTCTTTTGTTGTTGTTGTTGTTGCTATTTCTTGGGCCGCTCCCGCGGCATATGGAGGTTCCCAGGCCAGGGGTTGAATCGGAGCTGTAGCCACCGGCCTACGCCAGAGCCACAGCAACGCGGGATCCGAGCCGCGTCTGCAACCTACACCACAGCTCACGGCAACGCTGGATCCTTAACCCACTGAGCAAGGGCAGGGACCGAACCCGCACCTCATGGTTCCTAGTCGGATTCGTTAACCACTGCGCCACGACG	A	12	WXP2,WXP3,WXP7,XP2,XP6,XP7,LW4,LW5,LW6,LW7,LA7	ENSSSCG00000004057	ENSSSCT00000004486.4	intron_variant,feature_truncation	MODIFIER	SYTL3	protein_coding	INTRON=9/16,STRAND=-1	3	3	5	11
sv_00118	1	8517073	8517242	169	DEL	TTTCCACATATGTTCCATGTAATCGATAGACATATTCATTGTTGCTCAGGGACGATCGGGGTGAGTGTGGGTGGGCGGTGTGGTTGTGTCTGGGTAGTAGTGCTACAGTCGATCATAGTGAACTCCATATGCCAGGCCAAAAAAAAAAAAAAAAAAAAAAAAAAAAAAAC	T	14	WXP1,WXP2,WXP5,WXP7,XP2,XP3,XP4,XP5,XP6,XP7,LW1,LW2,LW3,LW5,LW6,LW7,LA1,LA2,LA5,LA6,DU4,DU5,DU6,DU7	ENSSSCG00000004057	ENSSSCT00000004486.4	intron_variant,feature_truncation	MODIFIER	SYTL3	protein_coding	INTRON=4/16,STRAND=-1	4	6	14	24
sv_00119	1	8630345	8633178	2833	DEL	ACTTGACTGCTCCTGTATTTACAGAGGTCAAGTAATGACCTAGGAAACAACGGATGGATCAGCAAAACGGCCAACCACAAGTCACCCGAGAGCAGAGCGCCAACGGAACACATCTATTGTCCTTCACGTTTCTTCAAGCCCTTTATCCTTTATGCCATGGACACAGGCGACTGTCTCGCCAGCATCCCTCCCCATATCTTCTGAATGAAACCCCAGGTTGGGAGTTCCCATTGTGGTGCAGTGCAAATGACTCCTACTAGTATCCACGAGGATGCGGCTTCCAGCCCTGACCTTGCTCAGAGGGAAAAGGATGCAGGGTTGCCCTGAGCTGGGGTGTAGGTCACAGATGCGGCTTGGATCCTGCGTGGCTATGGCTATGGCGTAAGCCTGAAGCTACAG…	A	8	XP2,XP3,XP6	ENSSSCG00000024876	ENSSSCT00000026720.3	intron_variant,feature_truncation	MODIFIER	TMEM181	protein_coding	INTRON=2/19,STRAND=-1	0	3	0	3
sv_00120	1	8818771	8818833	62	DEL	AGCCTCACTCAATGGGTTAAGGATCCAGCATTGCCATGAGCTGTGGTGTAAGTTGCAGGCTCC	A	16	WXP2,WXP3,WXP4,WXP5,WXP6,XP1,XP2,XP3,XP5,XP6,XP7,DU2,DU7	ENSSSCG00000031776	ENSSSCT00000050178.2	intron_variant,feature_truncation	MODIFIER	-	protein_coding	INTRON=1/13,STRAND=-1	5	6	2	13
sv_00121	1	8827721	8828021	300	DEL	TTGTTTTATTTATTTATTTTTTTTTTTTTGTCTTTTTGTCTTTTTGTTGTTGTTGTTGTTGCTATCTCTTGGGCCGCTTCCGCGGCATATGGAGGTTCCCAGGCTAGGGGTTGAATCGGAGCTGTAGCCACCGGCCTACACCAGAGCCACAGCAACGCGGGATCCGAGCTGCGTTTGCAACCTACACCACAGCTCACGGCAACGCCGGATCGTTAACCCACTGAGCAAGGGCGGGGACCGAACCCGCAACCTCATGGTTCCTAGTCGAATTCGTTAACCACTGCGCCACGACGGGAACTCC	T	19	WXP2,WXP3,WXP4,WXP5,WXP6,WXP7,XP1,XP2,XP3,XP5,XP6,XP7,LW4,LA6,LA7,DU1,DU2,DU5,DU6	ENSSSCG00000031776	ENSSSCT00000050178.2	upstream_gene_variant	MODIFIER	-	protein_coding	DISTANCE=3224,STRAND=-1	6	6	7	19
sv_00122	1	8882848	8883138	290	DEL	TCCTGTACATTCTTTTTTTTTTTTTTTTGTCTTTTTGTTGTTGTTGTTGTTGCTATTTCTTGGGCCGCTCCCGCGGCATATGGAGGTTCCCAGGCTAGGGGTTGAATCGGAGCTGTAGCCACCGGCCTACGCCAGAGCCACAGCAACACGGGATCCAAACCGCGTCTGCAACCTACACCACAGCTCACAGCAACGCCGGATCGTTAACCCACTGAGCAAGGGCAGGGACCGAACCCGCTAGCTCATGGTTCCTAGTCGGATTCGTTAACCACTGCACCACGACGGGAACTC	T	6	WXP5,XP1,XP4,XP7,LA7,DU7	ENSSSCG00000043930	ENSSSCT00000077640.1	intron_variant,feature_truncation	MODIFIER	-	protein_coding	INTRON=1/1,STRAND=-1	1	3	2	6
sv_00123	1	8897437	8897535	98	DEL	GGGGTCGATCGAAGCTACAGCCGCCGGCCTACACCACAGCCACAGCAACACCAGATCCAATTCGGGTCTGCGACCTACACCACAGCTCATGGCAATGCC	G	10	WXP3,WXP4,WXP5,WXP6,XP2,XP3,LA6	-	-	intergenic_variant	MODIFIER	-	-	-	4	2	1	7
sv_00124	1	8899690	8899968	278	DEL	TAAGAAAGACATTACAGGGAGTTCCCGTCATGGTGCAGTGGTTAACAAATCCGACTAGGAACCATGAGGTCGCGGGTTTGATCCCTGGCCTTGCTCAGTGGGTTAAGGATCTGGCATTGCTATGAGCTGTGGTGTAGGTTGCAGACGCGGCTCAGATCCCAAGTTGCTGTGGCTCTGGTGTAGGCCAGTGGCTACAGCTCTGGTTGGACCCCTAGCCTGGGAATCTCCATATGCCACGGGAGTGGCCCTAGAAAGGCAAAAAGACAAAAAAAAAAAAAA	T	10	XP5,LA7	-	-	intergenic_variant	MODIFIER	-	-	-	0	1	1	2
sv_00125	1	8919037	8919322	285	DEL	TTAAAATAAGCAAAACTGGAGTTCCCGTCATGGCGCAGTGGTTAACGAATCCGACTAGGAACCATGAGGTTGCAGGTTCGGTCCCTGGCCTTGCTCAGTGGGTTAACGATCTGGCGTTCCCTGAGCTGTGATGTGGGTTGCAGACGTGGCTCGTATCCCGCGTTGCTGTGGCTCTGGCATAGGCCAGCGGCTACAGCTCTGATTCGACCTCCACCCTGGGAACCTCCATATGCCGCGGGAGCAGCCCAAGAAATAGCAAAAAGACAAAAAAAAAAAAAAAATAAAA	T	4	LA5,LA7	ENSSSCG00000024019	ENSSSCT00000067537.1	intron_variant,feature_truncation	MODIFIER	GTF2H5	protein_coding	INTRON=2/2,STRAND=-1	0	0	2	2
sv_00126	1	8920869	8921152	283	DEL	TGACTGGAGTTCCCGTCGTGGCGCAGTGGTTAACGAATCCGACTAGGAACCATGAGGTTGCGGGTTCGGTCCCTGCCCTTGCTCAGTGGGTTAACGATCCGGCGTTGCCGTGAGCTGTGGTGTAGGTTGCAGACGCGGCTCGGATCCCGCGTTGCTGTGGCTCTGGCGTAGGCTGGTGGCTACAGCTCCGATTCGACCCCTAGCCTGGGAACCTCCATATGCCGCAGGAGCGGCCCAAGAAATAGCAACAACAACAAAAGACAAAAAAAAAAAAAAAAAAAAAA	T	12	WXP1,WXP3,WXP6,WXP7,XP3,XP4,XP5,XP6,LW4,LA6,LA7,DU7	ENSSSCG00000024019	ENSSSCT00000067537.1	intron_variant,feature_truncation	MODIFIER	GTF2H5	protein_coding	INTRON=2/2,STRAND=-1	4	4	4	12
sv_00127	1	8941547	8941780	233	DEL	AGGATGCAGTATATTCTTTTTTTTTTTTATTTTTTTTTATTTTCCCACTGTACAGCAAGGGGGTCAGGTTATCCTTACATGTATACATTACAATTATACTTTTCCCCCCACCCTTTCTTCTGTTGCAACATGAGTATCTAGACATAGTTCTCAATGCTATTCAGCAGGATCTCCTTGTAAATCTATTCTAAGTTGTGTCCGATAAGCCCAAGCTCCGGATCCCTCCCACTCCCG	A	12	WXP1,WXP3,WXP7,XP5,LW4,LA6,LA7	ENSSSCG00000012314	ENSSSCT00000013465.4	intron_variant,feature_truncation	MODIFIER	SERAC1	protein_coding	INTRON=1/15,STRAND=1	3	1	3	7
sv_00128	1	8967040	8967356	316	DEL	AAAAAAAAAAAAACGAGGAGTTCCCGTCGTGGCGCAGTGGTTAACGAATCCGACTAGGAACCATGAGGTTTGCGGGTTCGGTCCCTGCCCTTGCTCAGTGGGTTAACGATCCGGCGTTGCCGTGAGCTGTGGTGTAGGTTGCAGACGCGGCTCGGATCCCGCGTTGCTGTGGCTCTGGCGTAGGCCGGTGGCTACAGCTCCGATTCGACCCCTAGCCTGGGAACCTCCATATGCCGTGGGAGCGGCCCAAGAAATAGCAACAACCAAAAGACAAAAAAAAAAAAAAAAAAAAAAAAAACAACAAAACAAAACAAAAC	A	19	WXP3,WXP5,WXP6,WXP7,XP1,XP3,XP4,XP5,XP6,LW1,LW2,LW3,LW5,LW7,LA2,LA3,LA5,LA7,DU1,DU3,DU4	ENSSSCG00000012314	ENSSSCT00000013465.4	intron_variant,feature_truncation	MODIFIER	SERAC1	protein_coding	INTRON=8/15,STRAND=1	4	5	12	21
sv_00129	1	8979203	8979516	313	DEL	TAAAAGCTAGTCACTCTGGAGTTCCCGTCGTGGCGCAGTGGTTAACAAATCCGACTAGGAACCATGAGGTTGCGGGTTCGGTCCCTGCCCTTGCTCAGTGGGTTAACGATCCGGCGTTGCCGTAAGCTGTGGTGTAGGTCGCAGACGCGGCTCGGATCCCGCGTTGCTGTGGCTCTGGCGTAGGCCGGTGGCTACAGCTCCGATTCAACCCCTAGCCTGGGAACCTCCATATGCCGCGGGAGCGGCCCAAGAAATAGCAACAACAGCAACAACAACAACAACAGACAAAAAGACAAAAGACAAAAAAAAAAAAA	T	11	WXP7,XP2,XP3,XP4,XP6,LW1,LW2,LW6,LA1,LA6,DU3,DU5,DU6	ENSSSCG00000012314	ENSSSCT00000013465.4	intron_variant,feature_truncation	MODIFIER	SERAC1	protein_coding	INTRON=10/15,STRAND=1	1	4	8	13
sv_00130	1	8986563	8986856	293	DEL	GTGTCTTTTTGTGTTTTTTTTTGTCTTTTTTTTTTTGTTTTTTGTTGTTGTTGCTATTTCTTGGGCCGCTCCCGCGGCATATGGAGGTTCCCAGGCTAGGGGTTGAATCGGAGCTGTAGCCACCGGCCTACGCCAGAGCCACAGCAACGCAGGATCCGAGCCGTGTCTGCGACCTACACCACAGCTCACGGCAACGCCGGATCGTTAACCCACTGAGCAAGGGCAGGGACCGAACCCGCAACCTCATGGTTCCTAGTCGGATTCGTTAACCACTGTGCCACGACGGGAACTCCA	G	26	WXP4,WXP6,WXP7,XP2,XP4,XP6,XP7,LW1,LW2,LW3,LW4,LW5,LW6,LW7,LA1,LA2,LA3,LA4,LA5,LA6,LA7,DU3,DU7	ENSSSCG00000012314	ENSSSCT00000013465.4	intron_variant,feature_truncation	MODIFIER	SERAC1	protein_coding	INTRON=10/15,STRAND=1	3	4	16	23
sv_00131	1	9010379	9010459	80	DEL	GAAATGAAAAAGAAGTTACAACAGACATCACAGAAATATGAAGGATCATTAAAAGACTACTACGTGCAACTATATGCCGAA	G	9	WXP7,DU2	ENSSSCG00000012315	ENSSSCT00000025405.3	downstream_gene_variant	MODIFIER	SYNJ2	protein_coding	DISTANCE=4092,STRAND=-1	1	0	1	2
sv_00132	1	9137740	9138013	273	DEL	TCGGAATCATCCTTTTTTTTTTTGTCTTTTTTTGCTATTTCTTTGGGCCGCTCCCGAGGCATATGGAGGTTCCCAGGCCAGGGGGTGAATTGGAGCCGTAGCCACCGGCCTACGCCAGAGCCACAGCAACTCGGGATCCGAGCCGCGTCTGCAACCTACACCACAGCTCACGGCAACGCCGGATCGTTAACCCACTGAGCAAGGGCAGGGACCGAACCCGCAACCTCATGCTTCCTAGTCGGATTCGCCAACCACTGCGCCACGACGGGAACTC	T	7	WXP4,XP7	ENSSSCG00000030535	ENSSSCT00000030285.3	intron_variant,feature_truncation	MODIFIER	SNX9	protein_coding	INTRON=14/16,STRAND=-1	1	1	0	2
sv_00133	1	9162865	9164972	2107	DEL	GACTGATCTCTCTTCAGGCTCTTTTCCCAGGATGTGCGTTAACACACAGTACATCAAAGAAAGTAGACGAGGAGCTGGGTGGCCTTGCGTGGAATTCCAACTCCAACACCCAACAGCTATGTGACCTTTGAGGCTTGTCTTCTGTGAAGAAACGGGACTAATGTGATCTACCTTTCAAGATGATAAAGGAATTCAATAAAAAGATTTGAATAAGGATTTACGTACATAAATCGAAAGCCCTAGTATGTACTCATAAATTAAAATTACTTCTCACGTTGCAACAGAAGAAAGGGTGGGGGAAAAAACTGTAACTGCAATGTGTACATCTAAGGATAACCTGACCCCCTTGCTGTACAGTGGGAAAATAAAAATAAATAAATAAATAAATAAAATAAAAAT…	G	11	WXP5,WXP6,WXP7,XP1,XP2,XP3,XP4,XP6	ENSSSCG00000030535	ENSSSCT00000030285.3	intron_variant,feature_truncation	MODIFIER	SNX9	protein_coding	INTRON=5/16,STRAND=-1	3	5	0	8
sv_00134	1	9165274	9165543	269	DEL	GAGAAAAACTCCTTTTTTTTTGGTCTTTTTGCTATTTCTTAGGTCGCTCCCACGGCATATGGAGGTTCCCAGGCCAGGGGTCCAATTGGAGCCATAGCCACCGGCTATGCCAGAGCCACAGCAACGAGGGATCCGAGCCGTGTCTGCAACCTACACCACAGCTCACGGCAACGCCGGATCCTTAACCCACTGAGCAAGGGCAGGAACCGAACCCGCGACCTCATGGTTCCTAGTCGGATTCGTTAACCACTGCGCCATGACGGGAACTCC	G	3	XP7,DU1	ENSSSCG00000030535	ENSSSCT00000030285.3	intron_variant,feature_truncation	MODIFIER	SNX9	protein_coding	INTRON=5/16,STRAND=-1	0	1	1	2
sv_00135	1	9269744	9270048	304	DEL	ACGGAAATGGTATTTTTTTTTTTTTTTTTTTTTTTTGTCTTTTGTCTTTTTGTTGTTGTTGTTGTTGCTATTTCTTGGGCTGCTCCCCGGCATGTGGAGGTTCCCAGGCTAGGGGTTGAATCGGAGCTGTAGCCACCGGCCTACGCCAGAGCCACAGCAACGCGGGATCCGAGCCGCGTCTGCAACCTACACCACAGCTCACGGCAACGCCAGATCGTTAACCCACTGAGCAAGGGCAGGGACCGAACCCGCACCCTCATGGTTCCTAGTCGGATTCGTTAACCACTGCGCCACGACGGGAACTC	A	19	WXP7,XP3,XP6,DU7	-	-	intergenic_variant	MODIFIER	-	-	-	1	2	1	4
sv_00136	1	9308903	9309013	110	DEL	TTAGAAATCTAGACCGGGCAGAGCCTCCTTTCCTGCCTGCCAGCTTGCATCTCTCACAAATGTCCTATCTCAATAAAGCTATTTCTTGCCTAAAAAAAAAAAAAAAAAAAA	T	4	XP3,XP4	-	-	intergenic_variant	MODIFIER	-	-	-	0	2	0	2
sv_00137	1	9467727	9468027	300	DEL	AAAAAAAAAATGGGGAGTTCCCGTCGTGGCGCAGTGGTTAACGAATCCGACTAGGAACCATGAGGTTGTGGGTTCAGTTCCTGCCCTTGCTCAGTGGGTTAACGATCCGGCATTGCCGTGAGCTGTGGTGTAGGCTCGGATCCCGCGTTGCTGTGGCTCTGGCGTAGGCCAGTGGCTACAGCTCCGATTAGACCCCTAGCCTGGGAACCTCCATATGCCGTGGGAGTGGCCCAAAGAAATAGCAAAAAAAAAAAAAAAAAAAAAAGACAAAAAAATAAATAAATAAAAAATAAAAAAATTT	A	12	WXP2,WXP6,WXP7,XP5,XP6	ENSSSCG00000035027	ENSSSCT00000045836.2	intron_variant,feature_truncation	MODIFIER	ZDHHC14	protein_coding	INTRON=1/8,STRAND=-1	3	2	0	5
sv_00138	1	9608619	9608619	76	INS	A	AAAAAATGCTCAACATCACTGATTATTAGAGAAATGCAAATCAAAACTACTATGGGGCACCATCTCACACCAGTCAG	9	WXP5,XP5	ENSSSCG00000035027	ENSSSCT00000045836.2	intron_variant,feature_elongation	MODIFIER	ZDHHC14	protein_coding	INTRON=1/8,STRAND=-1	1	1	0	2
sv_00139	1	9611453	9611744	291	DEL	TAAAATACATGACAGGGAGTTCCCGTCGTGGCGCAGTGGTTAACGAATCCGACTAGGAACCATGAGGTTGCGGGTTCGATCCCTGCCCTTGCTCAGTGGGTTAACGATCCGGCGTTGCTGTGAGCTGTGGTGTAGGTTGCAGACGCGGCTCGGATCCCGCATTGCTGTGGCTCTGGCGTAGGCCTGTGGCTACAGCTCCGATTCAACCCCTAGCCTGGGAACCTCCATATGCCGCGGGAGCGGCCCAAGAAATAGCAAACAGACAAAAAATTAAAAAAATAAAAAATTAAAA	T	7	WXP6,XP4,XP6	ENSSSCG00000035027	ENSSSCT00000045836.2	intron_variant,feature_truncation	MODIFIER	ZDHHC14	protein_coding	INTRON=1/8,STRAND=-1	1	2	0	3
sv_00140	1	9626409	9626686	277	DEL	GAATCCAACTGCTGGAGTTCCCGTCGTGGCGCAGTGGTTAACGAATCCGACTAGGAACCATGAGGTTGCGGGTTCGATCCCTGCCCTTGCGCAGTGGGTCAAGGTTCCGGCGTTGCCGTGAGCTGTGGTGTAGGTCGCAGACGCGGCTCAGATCCTGCGTTGCTGTGGCTCTGGCGTAGGCTGGCAGCTACAGCTCCGATTAGACCCCTAGCCTAGGAACCTCCATATGCCGCGGGAGCGGCCCAAGAAATGGCAAAAAGACAAAAAAAAAAAAAAAA	G	15	WXP2,WXP3,WXP7,XP3,XP5,XP6	ENSSSCG00000038527	ENSSSCT00000053025.2	downstream_gene_variant	MODIFIER	-	protein_coding	DISTANCE=2236,STRAND=1	3	3	0	6
sv_00141	1	9703381	9703674	293	DEL	ACCTCATTGTGGTTTTTTTTTTTTTTTTTTGTCTTTTGTTGTTGTTGTTGTTGTTGCTATTTCTTGGGCCGCTCCCGCGGCATATGGAGGTTCCCAGGCTAGGGGTCGAATCGGAGCTGTAGCCACCGGCCTACGCCAGAGCCACAGCAACACGGGATCCGAGCCGCGTCTGCGACCTACACCACAGCTCACGGCAACGCCGGATCGTTAACCCACTGAGCAAGGGCAGGGACCGAACCCGCAACCTCATGGTTCCTAGTCAGATTCGTTAACCACTGCGCCACGACGGGAACT	A	19	WXP4,WXP6,WXP7,XP1,XP2,XP3,XP4,XP5,XP6,DU7	ENSSSCG00000004063	ENSSSCT00000004492.4	intron_variant,feature_truncation	MODIFIER	TMEM242	protein_coding	INTRON=3/3,STRAND=1	3	6	1	10
sv_00142	1	9732649	9732946	297	DEL	GCACTGAGGTTTTCTTCTTTTTTTTTTTTTTGTCTTTTGTCTTTTTTTGTTGTTGTTATTTCTTGGGCCGCTCCCGCGGCATATGGAGGTTCCCAGGCCAGGGGTTGAATCGGAGCTGTAGCCACCGGCCTACGCCAGAGCCGCAGCAACTCGGGATCCGAGCCGCGTCTGCAACCTACACCACAGCTCACGGCAACGCCGGATCGTTAACCCACTGAGCAAGGGCAGGGACCGAACCCGCAACCTCATGGTTCCTAGTCAGATTCATTAACCACTGCGCCACGATGGGAACTCCCGA	G	24	WXP2,WXP3,WXP4,WXP5,WXP6,WXP7,XP1,XP2,XP3,XP4,XP5,XP6,XP7,LW4,LW6,LW7,LA2,LA7,DU4	-	-	intergenic_variant	MODIFIER	-	-	-	6	7	6	19
sv_00143	1	9774051	9774141	90	DEL	GGGAAGATGCTCTTTTGGTCCGAATCAACCAGGAAGATGCTCTTTTGGTCCGAATCAACCAGGAAGATGCTCTTTTGGTCCGAATCAACCA	G	11	WXP2,WXP5,WXP6,WXP7,XP1,XP2,XP3,XP6,XP7	-	-	intergenic_variant	MODIFIER	-	-	-	4	5	0	9
sv_00144	1	9775121	9775432	311	DEL	CAAGAGGTCATCTTGGGAGTTCCCGTCGTGGCGCAGTGGTTAATGAATCCGACTAGGAACCATGAGGTTGCAGGTTCGGTCCCTGCCCTTGCTCAGTGGGTTAACGATTCGGCGTTGCCGTGAGCTGTGGTGTAGATTGCAGACGCGGCTCGGATCCCGCGTTGCTGTGGCTCTGGCGTAGGCCGGTGGCTACAGCTCCGATTGGACCCCTAGCCTGGGAACCTCCATATGCCGCGGGAGCGGCCCAAGAAATAGCAACAACAACAACAACAAAAAAGACAAAAAGACAAAAAAAAAAAAAAAAAAAAAAAA	C	13	WXP2,WXP3,WXP4,WXP5,WXP6,XP1,XP2,XP3,XP4,XP5,XP6,XP7,LA6	-	-	intergenic_variant	MODIFIER	-	-	-	5	7	1	13
sv_00145	1	9913067	9913214	147	DEL	CCCCATCCCGAAGTTATATACCTATTTGCTAATTTCCTGTCTCTCTTATTAGAATTTAAGTTTCATGAGGACAGGTCCCTTTGTCATTTGTGTGTCGTGTATTTTCCCCAGTTCCCAGAAACGTGCCCACAGCAGTGAATGCATTCAG	C	7	XP4,DU2,DU3,DU6	ENSSSCG00000004064	ENSSSCT00000004493.4	intron_variant,feature_truncation	MODIFIER	ARID1B	protein_coding	INTRON=6/20,STRAND=-1	0	1	3	4
sv_00146	1	9937018	9937130	112	DEL	GTATGTATACACACACACACACATAGTATGTATGTGTATATATATAGTATGTGTATGTATATATACACACACATATAGTATGTATGTGTATATATATATAGTATGTA	G	10	LW7,LA6,LA7,DU1,DU2,DU5	ENSSSCG00000004064	ENSSSCT00000004493.4	intron_variant,feature_truncation	MODIFIER	ARID1B	protein_coding	INTRON=5/20,STRAND=-1	0	0	6	6
sv_00147	1	9957964	9958295	331	DEL	TGTAAGAATTTTTTTTTTTTTTGTCTTTTTGTCTTTTTGTCTTTTGTTGTTGTTGTTATTTCTTGGGCCGCTCCCACGGCATATGGAGGTTCCCAGGCTAGGGGTTGAATCGGAGCTGTAGCCACCAGCCTACACCAGAGGCACAGCAACACAGGATCCGAGCCGCGTCTGCAACCTACACCACAGCTCACGGCAGCACCGGATCGTTAACCCACTGAGCAAGGGCAGGGACCGAACCCGCAACCTCATGGTTCCTAGTCGGATTCGTTAACCACTGCGCCACGACGGGAACTCCTTTTTTTTTATTATTTATTTATTTATTTTTTTTTTTG	T	17	LW6,LW7,LA7,DU1,DU5	ENSSSCG00000004064	ENSSSCT00000004493.4	intron_variant,feature_truncation	MODIFIER	ARID1B	protein_coding	INTRON=5/20,STRAND=-1	0	0	5	5
sv_00148	1	10037829	10038206	377	DEL	TTCTGACACTTCTTTTTTTTTTTTTTTTTTTTTTGTCTTTTGTCGTTGTTGTTGTTGTTGCTATTTCTTGGGCCGCTCCCGCGGCATATGGAGGTTCCCAGGCTAGGGGTTGAATCGGAGCTGTAGCCACCGGCCTACGCCAGAGCCACAGCAACGCGGGATCCGAGCCGCGTCTGCAACCTACACCACAGCTCACGGCAACGCCGGATCGTTAACCCACTGAGCAAGGGCAGGGACCGAACCCGCAACCTCATGGTTCCTAGTCGGATTCATTAACCATTGCGCCACGACAGGAACTCCTTTCTTTTTTTTTTTTTTTTTTTATTTATTTATTTTTTTGTCTTTTGTCTTTTTGTCTTTTGTTGTTGTTGTTGTTGC	T	21	WXP3,WXP4,WXP5,WXP6,WXP7,XP1,XP2,XP3,XP4,XP6,XP7,LW4,LW6,LW7,LA4,LA5,LA6,LA7,DU1,DU2,DU3,DU5,DU7	ENSSSCG00000004064	ENSSSCT00000004493.4	intron_variant,feature_truncation	MODIFIER	ARID1B	protein_coding	INTRON=4/20,STRAND=-1	5	6	12	23
sv_00149	1	10091003	10091300	297	DEL	TAAAATTCCGGAGTTCCCGTCGTGGCGCAGTGGTTAACGAATCCGACTAGGAACCATGAGGTTGCGGGTTCGGTCCCTGCCCTTGCTCAGTGGGTTAACAATCCGGCGTTGCCGTGAGCTGTGGTGTAGGTTGCAAACACGGCTTGGATCCTGCGTTGCTGTGGCTCTGGCGTAGGCCGGTGGCTACAGCTCCAATTGGACCCCTAGCCTGGGAACCTCCATATGCCGCGGGAGCGGCCCAAGAAATAGCAGCAACAACAACAACAACAACAACAACAAAATAAATAAATTAAAAAAA	T	14	LA5,LA6,LA7,DU5	ENSSSCG00000004064	ENSSSCT00000004493.4	intron_variant,feature_truncation	MODIFIER	ARID1B	protein_coding	INTRON=3/20,STRAND=-1	0	0	4	4
sv_00150	1	10097406	10097573	167	DEL	TTAAAAAATATTTAGACATTCTATAGTTAGGGAGTATGAAAACATGAAAAAAAAAACTTCTAATATACTTCAAGAAAAATGGGTTTTTTCTCAGAATATATGGCAAATGACAATACATATGTCAAGGAGGTGTTTGGGTTTTTTTTGTTTTTGTTTTTATTTTTTTGG	T	8	XP3,XP5,XP6	ENSSSCG00000004064	ENSSSCT00000004493.4	intron_variant,feature_truncation	MODIFIER	ARID1B	protein_coding	INTRON=3/20,STRAND=-1	0	3	0	3
sv_00151	1	10140502	10140795	293	DEL	ACCAGAGGCTTTTTTCTTTTTTTTTTTTTTTTTTTTTTTTTTTTTTTTTTTTTTGCTATTTCTTGGGCCGCCCCTGCGGCATATGGAGGTTCCCAGGCTAGGGGTCGAATCGGAGCCGTAGCCACCGGCCTACGCCAGAGCCACAGCAACGCAGGATCCGAGCCGCGTCTGCAACCTACACCACAGCTCACGGCAACGCCGGATCGTTAACCCACTGAGCAAGGGCAGGGACCGAACCTGCAACCTCATGGTTCCTAGTCGGATTCGTTAACCACTGCGCCACGACGGGAACTC	A	15	WXP7,XP1,XP6,XP7,LW4,LA4,LA6,LA7,DU5,DU7	ENSSSCG00000004064	ENSSSCT00000004493.4	intron_variant,feature_truncation	MODIFIER	ARID1B	protein_coding	INTRON=2/20,STRAND=-1	1	3	6	10
sv_00152	1	10144979	10145246	267	DEL	TAAAAATACAGATCTGGAGTTCCCGTCGTGGCGCAGTGGTTAACGAATCCGACTAGGAACCATGAGGTTGCAGGTTCGGTCCCTGCCCTTGCTCAGTGGGTTGATGATCCGGCGTTGCCGTGAGCTGTGGTGTAGGCTGCAGACGCGGCTCGGATCCTGCGTTGCTGTGGCTCTGGCGTAGGCCAGTGGCTACAGCTCCGATTCGACCCCTAGCCTGGGAACCTCCATATGCCGCAGGAGCGGCCCAAGAAATAGCAAAAAGACCAAA	T	15	WXP6,WXP7,XP1,XP6,XP7,LW4,LW5,LW6,LA4,LA5,LA6,LA7	ENSSSCG00000004064	ENSSSCT00000004493.4	intron_variant,feature_truncation	MODIFIER	ARID1B	protein_coding	INTRON=2/20,STRAND=-1	2	3	7	12
sv_00153	1	10254045	10254346	301	DEL	TTATTCTAGCTTTTTTTTTTTTTTTTTGTCTTTTGTCTTTTTGTCTGTTGTTGTTGTTGTTGCTATTTCTTGGGCCGCTCCCACGGCATATGGAGGTTCCCAGGCTAGGGGTTGAATCGGAGCTGTAGCCACCGGCCTACGCCAGAGCCACAGCAACGCGGGATCCGAGCCGTGTCTGCAACCTACACCACAGCTCACGGCAACGCCGGATCGTTAACCCACTGAGCAAGGGCAGGGACCGAACCTGCAACCTCATGGTTCCCAGTCGGATTCGTTAACCACTGCGCCACGACGGGAACTCC	T	19	LW5,LW6,LW7,LA5,LA7	-	-	intergenic_variant	MODIFIER	-	-	-	0	0	5	5
sv_00154	1	10269226	10269547	321	DEL	GCTAGGAGAGTAAATCTTTATTTATTTATTTTCTTTTCTTTCTTTTTTTTTTTTTTTGTTTGTTTGTTTGTTTGTCTTTTTGCTGTTTCTTTGGGCCGCTCCCACGGCATATGGAGGTTCCCAGGCTAGGGGTCGAATCGGAGCTGTAGCCACCAGCCTATGCCAGAGCCATAGCAACTCGGGATCCGAGCCGCAGCTGCAATCTACACCACAGCTCACGGCAATGCCGGATCGTTAACCCACTGAGCAAGGCCAGGGACCGAACCCGCAACCTCATGGTTCCTAGTCGGATTTGTTAACCACTGCGCCACGATGGGAACTC	G	7	LA6,LA7,DU5	ENSSSCG00000041910	ENSSSCT00000070463.1	downstream_gene_variant	MODIFIER	-	lncRNA	DISTANCE=857,STRAND=-1	0	0	3	3
sv_00155	1	10279405	10279705	300	DEL	TACCCTCCACTTTTTTTTTTTTTTTTTTTTTTCTGGTTGTTGTTGTTGTTGTTATTGTTGCTATTTCTTGGGCCGCTCCCTCAGCATATGGAGGTTCCCAGGCTAGGGGTTGAATCGGAGCTGTAGCCACCGGCCTACGCCAGAGCCACAGCAATGCGGGATCCGAGCCGCGTCTGCAACCTACACCACACCTCACGGCAACGCCGGACCCTTAACCCACTGAGCAAGGGCAGGGACCGAACCCGCAACCTCATGGTTCCTAGTCAGATTCGTTAACCACTGCGCCACGACGGGAACTCCA	T	10	WXP2,WXP3,WXP5,WXP7,XP2,XP3,XP4,XP6,LW6	ENSSSCG00000041910	ENSSSCT00000070463.1	upstream_gene_variant	MODIFIER	-	lncRNA	DISTANCE=2715,STRAND=-1	4	4	1	9
sv_00156	1	10351180	10351474	294	DEL	TTTTTTATACTGTCTTTTTTTTTTTGTCTTTTTGTCTTTTTGTTGTTGTTGTTGCTATTTCTTGGGCCGCTCCTGCGGCATATGGAGGTTCCCAGGCTAGGGGTCCAATCGGAGCTGTAGCCACCGGCCTACGCCAGAGCCACAGCAACGCGGGATCCGAGCCACGTCTGCAACCTACACCACAGCTCACGGCAACGCCGGATCGTTAACCCACTGAGCAAGGGCAGGGACCGAACCCGCAACCTCATGGTTCCTAGTCGGATTCGTTAACCACTGCGCCACGACGGGAACTCCC	T	7	XP1,XP3,DU1,DU3,DU4	-	-	intergenic_variant	MODIFIER	-	-	-	0	2	3	5
sv_00157	1	10355835	10356340	505	DEL	CGCCGTCCGTCTATCCCGCGGCCCTGTCTGCGTCCGCGACGCCGTCCGTCTATCCCGCTGCCCTGTCTGCGTCCGCGACGCCGTCCGTCTATCCCGCGGCCCTGTCTGCGTCCGCGATGCCGTCCGTCTATCCCGCGGCCCTGTCTCCGTCTGCGACGCCGTCCGTCTATCCCGCGGCCCTGTCTCCGTCCGCGACACCGTCCGTCTATCCCGCGGCCGTCCGTCTATCCCGCTGCCCTGTCTCCGTCCGCGACACCGTCCGTCTATCCCGCGGCCGTCCGTCTATCCCGCTGCCCTGTCTGCGTCCGCGACACCGTCCGTCTATCCCGCTGCCCTGTCTCCGTCCGCGACACCGTCCGTCTATCCCGCGGCCGTCCGTCTATCCCGCTGCCCTGTCTG…	C	4	XP1,XP3	-	-	intergenic_variant	MODIFIER	-	-	-	0	2	0	2
sv_00158	1	10463141	10463446	305	DEL	AGAAACTTGGAGTTTTTTTTTTTTTTTTTTTTCTTTTTTCTTTTTGTCTTTTGTTGTTGTTGTTGCTATTTCTTGGGCCGCTCCCGCGGCATATAGAGGTTCCCAGGCTAGGGGTTGAATTGGAGCTGTAGCCACCGGCCTATGCCAGAGCCACAGCAACGCGGGATCCGAGCAGCGTCTGCAACCTACACCACAGTTCACGGCAACGCCGGATCCTTAACCCACTGAGCAAGGGCAGGGATCGAACCCGCAACCTCATGGTTCCTAGTCGGATTCGTTAACCACTGCGCCACGACGGGAACTCCC	A	17	WXP3,WXP5,WXP6,XP3,XP4,XP6,LW4,LW5,LW6,LW7,LA5,LA6,LA7,DU1,DU5,DU7	-	-	intergenic_variant	MODIFIER	-	-	-	3	3	10	16
sv_00159	1	10489825	10490123	298	DEL	TTAAAATCTCTTCAGGGAGTTCCCGTCGTGGCACAGTGGTTAACGAATCCGACTAGGAACCATGAGGTTGCGGGTTCGGTCCCTGCCCTTGCTCAGTGGGTCAATGATCCGGCGTTGCCGTGAGCTGTGGTGTAGGTCGCAGATGCGGCTCGGATCCAGCGTTGCTGTGGCTCTGGCGTAGGTGGGCAGCTACAGCTCCGATTTGACCCCTAGCCTGGGAACCTCCCATATGCCGTGGGAGCGGCCCAAGAAATAGCAAAAAGACCAAAAAAAAAAAAAATTAATTAAAAAAAATAAAA	T	19	WXP6,WXP7,XP4,XP7	-	-	intergenic_variant	MODIFIER	-	-	-	2	2	0	4
sv_00160	1	10594936	10595263	327	DEL	CAAAAACTCAGTATGCGGAGTTCCCGTCGTGGCGCAGTGGTTAACGAATCAGACTAGGAACCATGAGGTCGCGGGTTCAGTCCCTGCCCTTGCTCAGTGGGTTAATGATCTGGCGTTGCCGTGAGCTGTGGTGTAGGTTGCAGACGCGGCTCGGATCCCGCGTTGCTGTGGCTCTGGCGTAGGCCGGTGGCTACAGCTCCAATTCAACCCCTAGCCTGGGAACCTCCATATGCCGCGGGAGCGGCCCAAGAAATAGCAGCAACAACAACAACAACAACAACAACAACAACAAAAAAAGACAAAAAGACAAAAAAAAAAAAAAAAAAAA	C	12	WXP3,WXP7,XP1,XP2,XP3,XP4,XP5,XP6,DU1,DU2,DU3,DU4	-	-	intergenic_variant	MODIFIER	-	-	-	2	6	4	12
sv_00161	1	10655917	10656215	298	DEL	AAATTTTAGCACTTTATTTTTTTTTTATTATTTATTTATTTATTTATTTTTTTTTTTTGCTATTCCTTGGGCCGCTCCTGTGGCATATGGAGGTTCCCAGGCTAGGGGTCGAATCGGAGCTGTAGCCACCGGCCTATGTCAGAGCCATAGCAACGCGGGATCCGAGCCGCGTCTGCAACCTACACCACAGCTCACGGCAACGCCAGATCCTTAACCCACTGAGCAAGGGCAGGGACTGAACCCGCAACCTCATGGTTCCTAGTCAGATTCGTTAACCACTGCGCCACGATGGGAACTCC	A	7	LW4,LW5,LA4,LA5,DU5,DU7	-	-	intergenic_variant	MODIFIER	-	-	-	0	0	6	6
sv_00162	1	10679994	10680304	310	DEL	AATACTTTCCAAGGGAGTTCCCGTCGTGGTGCAGTGGTCAACAAATCCGACTAGGAACCATGAGGTTGCGGGTTCGGTCCCTGCCCTTGCTCAGTGGGTTAACGATCCGGCGTTGCCGTGAGCTGTGGTGTAGGTCACAGACGTGGCTCGGATCCCGCGTTGCTGTGGCTCTGGCGTAGGCCGGTGGCTACAGCTCCGATTCAACCCCTAGCCTGGGAACCTCCATATGCCGCGGGAGCGGCCCAAGAAATAGCAACAATAACAACAACAACAACAACAAAAAGACAAAAGACAAAAAAAAAAAAAAATAT	A	14	WXP4,WXP6,WXP7,XP2,XP3,XP5,XP6,LW4,LW7,LA5,LA6,DU1,DU7	-	-	intergenic_variant	MODIFIER	-	-	-	3	4	6	13
sv_00163	1	10714435	10716975	2540	DEL	CGGATCCTTAACCCACTGAGCGAGGCCAGGGATCGAACCTGCAACCCCATGGCACCACAACAGGAACTCCTACCATTGTTACTTATGATGTTGCCCAAATCATATTAGCTTTGGCTACTGGGAGCCTTTTCACTTTTGTTCTTAGGTCCCCTGGACATGCTGTCATTAAATATATTGTTTTAAACTTTCCTGCACTAAAAGATGTTCTAGGATCAACTTGTTGGTTTTGTTGTTGTTGTTGTTGTTGTTGTTGTTTTGTTTCATTTTGTGCCCTGGCCTTAGAATCTTGGAGAGCTCTGTGGGGTGAGGAACTGAGACTTTCGTTCCAGTAGCCATGTGAGTGAGTCAACTTGAAATGGGATTCTTCAGGGAGTTCCTGTTGTAGTTCAGCAGGTTAAG…	C	11	XP2,XP5	-	-	intergenic_variant	MODIFIER	-	-	-	0	2	0	2
sv_00164	1	10730395	10730659	264	DEL	TAATAGTGATTAAGTTGTGGAGAAGAGACTTGTGGTTGCCTGATGGGAGGGGGAGGGAGTGGGAGGGATCGGGAGCTTGGGCTTATCAGACACAACCTAGAATAGATTTATAAGGAGATCCTGCTGAATAGCATTGAGAACTATGTCTAGATACTCATGTCACAACAGAAGAAAGGGTGGGGGAAAAAACTGTAACTGCAATGTATACATCTAAGGATGACCTGACCCCCTTGCTGTACAGTGGGAAAATAATAAAAAAAAAAAA	T	15	WXP2,WXP4,WXP5,WXP6,XP1,XP6,XP7,LW4,LW5,LW6,LW7,LA5,LA7,DU4,DU5	ENSSSCG00000047964	ENSSSCT00000080502.1	intron_variant,non_coding_transcript_variant,feature_truncation	MODIFIER	-	lncRNA	INTRON=2/2,STRAND=-1	4	3	8	15
sv_00165	1	11027132	11027412	280	DEL	TCCACAAAGATAGTTTTTTTTTTTTTTTTTTGGTCTTTTTGCCATTTCTTTGGGCCGCTCCCGCGGCATATGGAGGTTCCCAGGCTAGGGGTCTAATTGGAGCTGTAGCCACTGGCCTGCGCCAGAGCCACAGCAACGCGGGATCCGAGCCGCATCTGCAACCTACACCACGGCTCATGGCAACGCCGGATCCTTAACCCACTAAGCAAGGGCAGGGATCGAACCTGCAACCTCATGGTTCCTAGTCAGATTCGTTAACCACTGCGCCACGACGGGAACTC	T	6	LA4,LA5,LA7	-	-	intergenic_variant	MODIFIER	-	-	-	0	0	3	3
sv_00166	1	11077363	11077443	80	DUP:TANDEM	GACAACCTTCAACAAGCTTTTAATTTCTCTTGACTTGCTCTCAATGACTGATTCAAAATTGTTTTGTTTTGTTTTTCTATT	GACAACCTTCAACAAGCTTTTAATTTCTCTTGACTTGCTCTCAATGACTGATTCAAAATTGTTTTGTTTTGTTTTTCTATTACAACCTTCAACAAGCTTTTAATTTCTCTTGACTTGCTCTCAATGACTGATTCAAAATTGTTTTGTTTTGTTTTTCTATT	4	DU4,DU6	-	-	intergenic_variant	MODIFIER	-	-	-	0	0	2	2
sv_00167	1	11179455	11179776	321	DEL	TAAAAACTATAAAATATTGGAGTTCCCATCGTGGCGCAGTGGTTAACGAATCCGACTAGGAACCATGAGGTTGCGGGTTCGATCCCTGCCCTTGCTCAGTGGGTTAAGGATCCGGCGTTGCCGTGAGCTGTGGTGTAGGTTGCAGACGCGGCTTGGATCCCTCGTTGCTGTGGCTCTGGCGTAGGCCGGTGGCTACAGCTCTGATTCAACCCCTAGCCTGGGAACCTCCATATGCCGCGGGAGCGGCCCAAGAAATAGCAACAATAACAACAACAACAACAAAGACAAAAGACAAAAAAAAAAAAAAAAAAAAAAAACACAA	T	13	XP5,XP6	-	-	intergenic_variant	MODIFIER	-	-	-	0	2	0	2
sv_00168	1	11281487	11281617	130	DUP:TANDEM	CAGCAATGAGTTCATTCCAGTCTTGTATTTCAGTCTGTTTGTCGCCTGATGGAGAAAATAGGTAAGAAGGAAACATAAAACTATTGCTCTCTGAAGCTTTTACAGAGTAGAACTTTCTCTGCTGATTGTGG	CAGCAATGAGTTCATTCCAGTCTTGTATTTCAGTCTGTTTGTCGCCTGATGGAGAAAATAGGTAAGAAGGAAACATAAAACTATTGCTCTCTGAAGCTTTTACAGAGTAGAACTTTCTCTGCTGATTGTGGAGCAATGAGTTCATTCCAGTCTTGTATTTCAGTCTGTTTGTCGCCTGATGGAGAAAATAGGTAAGAAGGAAACATAAAACTATTGCTCTCTGAAGCTTTTACAGAGTAGAACTTTCTCTGCTGATTGTGG	6	LW7,LA5	-	-	intergenic_variant	MODIFIER	-	-	-	0	0	2	2
sv_00169	1	11283840	11283978	138	DEL	AAAAGAAAGAAAGAAAGAAAGAAAGAAAGAAAGAAAGAAAGAAAGAAAGAAAGAAAGAAAGAAAGAAAGACGGAAAGAAAGAAAGAAAGACGGAAAGAAAAAGAAAGAAAGAAAGAAAGAAAGAAAGAAAGAAAGAAAG	A	3	XP2,XP3,XP6,LW5	-	-	intergenic_variant	MODIFIER	-	-	-	0	3	1	4
sv_00170	1	11366309	11374869	8560	DEL	TAAAGAACTCTCTGAGGGAGAGAGGACAAGATGGCGGAGGAGTAGGGGGACACGCTCGCCCTCTCCCACAAACACAACAAAAAAAGCACATCTACAGAAGAAATGACTCGCACAGAACAACAACCAATCGCTGGCAGAGGAACCTAAACTCCAATAACGGCAAGAAATTCGTGACATTATTGGGCAGAACGGGAGAAAAGAGGAGAGTGAGAGAAGGTGAATCCGAGCGGGACGGGCGCTCCCGAAAGGGAACTGCAGAGGAGAAAGGGATCCCGCACCCTGGAAAGTCTCCTACCGGGGGAAAGATCAAACGAACCGGAGGAATCTCCAGATGCAGAGAAGAGTGTAGCAGTAAGTCGGAGTACGGAAAAACGATCAAGAACCCAACGGACCATCTGA…	T	7	XP1,XP2,XP3,XP4,XP5,XP6	-	-	intergenic_variant	MODIFIER	-	-	-	0	6	0	6
sv_00171	1	11419338	11420759	1421	DEL	TTTTCCTATGATTTCTTTTTTTTTTTTTTTTAATTTTATTTTCCCACTGTACAGCAAGGGGGTCAGGTTATCCTTACATGTATACATTACAATTACAGTTTTTCCCCCACCATTTCTTCTGTTGCAACATGAGTATCTAGACATAGTTCTCAATGCTATTCAGCGGGATCTCCTTGTAAATCTATTCTACATTGTGACTGATAAGCCCAAGCTCCCGATCCCTCCCACTCCCTCCCCCTCCCATCAGGCAACCACAAGTCTCTTCTCCAAGTCCATGATTGATTTTCTTTTCTGAGGAGATGTTCATTTGTGCTGGATATTAGATTCCAGTTATAAGTGATGTCATATGGTATTTGTCTTTGTCTTTCTGGCTCATTTCACTCAGTATGAGATTCTCTA…	T	6	XP1,XP2,XP5,XP6	-	-	intergenic_variant	MODIFIER	-	-	-	0	4	0	4
sv_00172	1	11444622	11444902	280	DEL	TTTTTTTTTTTTTTTTGTCTTTTTGTTGTTGTTGTTGCTATCTCTTGGGCCGCTTCCGCAGCATATGGAGGTTCCCAGGCTAGGGGTTGAATCGGAGCTGTAGCCACCGGCCTACGCCAGAGCCACAGCAACGAGAGATCCGAGCCGCGTTTGCAACCTACACCACAGCTCTCGGCAACGCCGGATCGTTAACCCACTGAGCAAGGGCAGGAACCGAACCCGAAACCTCATGGTTCCTAGTCGGATTCGTTAACCACTGCGCCACAACGGGAACTCCAAGG	T	7	XP1,LA7,DU7	ENSSSCG00000004068	ENSSSCT00000004497.3	upstream_gene_variant	MODIFIER	NOX3	protein_coding	DISTANCE=1158,STRAND=1	0	1	2	3
sv_00173	1	11650668	11650915	247	DEL	ATTCCTTTCTCTTGGGTTGAAGGGATGGGGGGAGCTCAGATGTGTTTCTGCAGACAACAATTGTGTATTTTTGATGGCTGTAGGTTACTTTGCAAGTAGAGAAAAAAATGGAAAATACATAGTAAATTTGAAGAGGTCAAACTGTGACCGAAAGAGATACATTTTTGTAAGAGTAAAACTGAGATGAAAGAGATTCATAGAACAGCTTAACACAGAAAGAAGGTTCTAAACACTTAAGCTGAGATTTT	A	4	XP1,XP7	ENSSSCG00000004065	ENSSSCT00000004494.4	intron_variant,feature_truncation	MODIFIER	TIAM2	protein_coding	INTRON=26/26,STRAND=-1	0	2	0	2
sv_00174	1	11670799	11670979	180	DEL	GGCTGTGGCTGTGGTGTAGGCCGGCAGCTATGGCTCTGATTGGATCCCTAGCCTGGGAACCTCCATATGCCACAGGTGCAGTCCTTAAAAAAAAAAAAGACAAAGTATCTTTTTCCTTATCTTTTTTCCTATTCCTCCCACCCACAAGTTCCAGCCCATCTCACCACCTACCAGTCCATCA	G	9	WXP3,WXP5	ENSSSCG00000004065	ENSSSCT00000004494.4	intron_variant,feature_truncation	MODIFIER	TIAM2	protein_coding	INTRON=15/26,STRAND=-1	2	0	0	2
sv_00175	1	11788572	11788868	296	DEL	TAAAAAGTAAACACAGGGAGTTCCCGTCGTGGCGCAGTGGTTAACGAATCCGACTAGGAACCATGAGGTTGCGGGTTCGGTCCCTGCCTTTGCTCAGTGGGTTAACGATCCGGCGTTGCCGTGAGCTGTGGTGTAGGTTGCAGACGCGGCTCGGATCCCGCGTTGCTGTGGCTCTGGCGTAGGCCGGTGGCTACAGCTCCGATTCAACTCCTAGCCTGGGAACCTTCATATGCCACAGGAGCGGCCCAAGAAATAGCAACAACAACAACAACAAAAAGGCAAAAGACAAAAAAAAAA	T	15	WXP7,XP1,XP2,XP7,LW5,LA4,LA5,LA6	ENSSSCG00000004065	ENSSSCT00000004494.4	intron_variant,feature_truncation	MODIFIER	TIAM2	protein_coding	INTRON=1/26,STRAND=-1	1	3	4	8
sv_00176	1	11839795	11840110	315	DEL	TTAAAATGACAGGGAGTTCCCGTCGTGGCGCAGTGGTTAACGAATCTGACTAGGAACCATGAGGTTGCGGGTTCGGTCCCTGCCCTTGCTCAGTGGGTTAACGATCCGGCGTTGCCGTGAGCTGTGGTGTAGGTTGCAGACGCGGCTCGGATCCCGCGTTGCTGTGGCTCTGGCGTAGGCCGGTGGCTACAGCTCCGATTCAACCCCTAGCCTGGGAACCTCTATATGCCGCGGGAGCGGCCCAAGAAATAGCAACAACAACAACAACAACAACAACAAAAAGACAAAAAATAAAAGACAAAAATAAATAAATAAA	T	5	XP1,LW4,LA5,LA6,LA7,DU1,DU7	ENSSSCG00000004070	ENSSSCT00000062929.2	intron_variant,feature_truncation	MODIFIER	SCAF8	protein_coding	INTRON=23/24,STRAND=-1	0	1	6	7
sv_00177	1	11867934	11868251	317	DEL	TAAGAATCTGATTGCGGAGTTCCCGTCGTGGCGCAGTGGTTAACGAATCCGACTGGGAACCATGAGGTCGCGGGTTCGGTCCCTGCCCTTGCTCAGTGGGTTAACGATCCGGCGTTGCCGTGAGCTGTGGTGTAGGTTGCAGACGCGGCTCGGATCCTGCGTTGCTGTGGCTCTGGCGTAGGCCGGTGGCTACAGCTCCGATTCAACCCCTAGCCTGGGAACCTCCATATGCCGCGAGAGCAGCCCAAGAAATGGCAAAAAGACAAAAAAACAAACAAACAACAAAAAATAAAATAAAATAAAATTAAAAAAAAAAAA	T	12	WXP5,WXP6,WXP7,XP1,XP4,LW4,LW5,LW6,LA4,LA5,LA7,DU1,DU2,DU3,DU4,DU5,DU7	ENSSSCG00000004070	ENSSSCT00000062929.2	intron_variant,feature_truncation	MODIFIER	SCAF8	protein_coding	INTRON=23/24,STRAND=-1	3	2	12	17
sv_00178	1	11868806	11869074	268	DEL	TAGCAAGTTTGCTTTTTTGTTGTTGTTGCTATTTCTTGGGCCGCTCCTGCGGCATATGGAGGTTCCCAGGCTAGGGGTCGAATCGGAGCTGTAGCCACTGGCGTACGCCAGAGCCACAGCAACGCAGGATCCGAGCCGCGTCTGCAACCTACACCACAGCTCACGGCAACGCCGGATCGTTAACCCACTGAGCAAGGGCAGGGACCGAACCCGCGACCTCATGGTTCCCAGTCGGATTCGTTAACCACTGCGCCACGACGGGAACTCCC	T	7	LA6,LA7,DU5,DU7	ENSSSCG00000004070	ENSSSCT00000062929.2	intron_variant,feature_truncation	MODIFIER	SCAF8	protein_coding	INTRON=23/24,STRAND=-1	0	0	4	4
sv_00179	1	11986842	11986971	129	DEL	TGCCGCTGCCCACCCTCTCCTCTGTCCCCAGCAGGTCATCCCTGCAAGGAAAACAGAGTCACAGGGCCTTTGGGCTGGGCACTGTTTCCCCCAGGGCGCTCTCCGGGCTTTCTCTAAATTAGGACAGA	T	13	WXP1,WXP2,WXP5,WXP6,WXP7,XP1,XP2,XP3,XP6,LW5,LW6,LA6,DU2,DU4,DU5,DU6,DU7	ENSSSCG00000004070	ENSSSCT00000004499.4	intron_variant,feature_truncation	MODIFIER	SCAF8	protein_coding	INTRON=23/23,STRAND=-1	5	4	8	17
sv_00180	1	11991997	11992293	296	DEL	TCTCTTCCTTCTTTTTTTTTTTTCTTTTTCTTTTTCTTTTTCTTTTTTTGTCTTTTTGCTATTTCTTGGGCCACTCCTGCAGCATATGGAGGTTCCCAGGCTAGGGGTCTAATCGGAGCCGTAGCCACCAGCCTACGCCAGAGCCACAGCAACGCGGGATCCGAGCCGCATCTGCGACCTACACCACAGCTCACGGCAACGCCGGATCCCCAACCCACTGAGCAAGGGCAGGGATCGAACCCACAACCTCATGGTTCCTAGTCGGATTCGTTAACCACTGCGCCACGACGGGAACTC	T	20	WXP3,WXP4,WXP6,XP1,XP2,XP3,XP5,XP7,LW7,LA7,DU5,DU7	ENSSSCG00000004070	ENSSSCT00000004499.4	intron_variant,feature_truncation	MODIFIER	SCAF8	protein_coding	INTRON=23/23,STRAND=-1	3	5	4	12
sv_00181	1	12005687	12005965	278	DEL	ATTAAGTGCCATTATTATTATTATTTTTTTTCTTTTTAGCTATTTCTTGGGCCGCTCCTGCGGCATATGGAGGTTCCCAGGCTAGGGGTCTCATCGGAGCTGTAGCCACCGGCCTACGCCAGAGCCACAGCAACACGGGATCCGAGCCGCGTCTGCAACCTACACCACAGCTCACGGCAACGCCGGATCGCTAACCCACTGAGCAAGGGCAGGGACCGAACCCGCAACCTCATGGTTCCTAGTCGGATTCGTTAACCACTGCGCCACGACGGGAACTCC	A	17	WXP2,WXP3,WXP5,WXP7,XP4,XP5,LW4,LW5,LW7,LA6,LA7,DU2,DU4,DU7	ENSSSCG00000004070	ENSSSCT00000004499.4	intron_variant,feature_truncation	MODIFIER	SCAF8	protein_coding	INTRON=23/23,STRAND=-1	4	2	8	14
sv_00182	1	12013641	12013917	276	DEL	TTGGAATTCCTGTTTTTTTTTTTTTTTTGTCTTTTTGCCATTTCTTGGGCCGCTCCCGCGGCATATGGAGGTTCCCAGGCTAGGGGTCTCATCGGAGCTGTAGCTACTGGCCTACGCCAGAGCCACAGCAACATGGGATCCGAGCCGCGTCTGCAACCTACACCACAGCTCACGGCAACACCGGATCATTAACCCACTGAGCAAGGGCAGGGACCGAACCCGCAACCTCATGGTTCCTAGTCGGATTCGTTAACCACTGCGCCACGACGGGAACTCC	T	14	WXP1,WXP2,WXP3,WXP4,WXP5,WXP6,WXP7,XP2,XP4,XP5,XP6,XP7,LW5,LW6,LW7,DU2,DU3	ENSSSCG00000004070	ENSSSCT00000004499.4	intron_variant,feature_truncation	MODIFIER	SCAF8	protein_coding	INTRON=23/23,STRAND=-1	7	5	5	17
sv_00183	1	12058411	12058714	303	DEL	TAAAAGTACGTCACTCGGGAGTTCCCGTCGTGGCGCAGTGGTTAACGAATCCGACTAGGAACCATGAGGTTGCGGGTTCAGTCCCTGCCCTTGCTCAGTGGGTTAACGATCCGGCGTTGCCGTGAGCTGTAGTGTAGGTTGCAGACGCGGCTCGGATCCCGAGTTGCTGTGGCTCTGGCGTAGGCCGGTGGCTCCAGCTCCGATTCAACCCCTAGCCTGGGAACCTCCATATGCCGCGGGAGCGGCCCAAGAAATAGCAACAACAACAAAAGACAAAAAAAAAATTTAAAAAAAAAAAAAAAAA	T	16	WXP2,WXP6,XP2,XP3,XP4,XP5,XP6,XP7,LW4,LW5,LW7,LA4,LA6,LA7,DU3,DU6,DU7	ENSSSCG00000004070	ENSSSCT00000004499.4	intron_variant,feature_truncation	MODIFIER	SCAF8	protein_coding	INTRON=15/23,STRAND=-1	2	6	9	17
sv_00184	1	12141781	12142053	272	DEL	CAAAAAAGAGAGTCTGAGTTCCCGTCGTGGCGCAGTGGTTAACGAATCTGACTAGGAACCATGAGGTTGTGGGTTCGATCCCTGCCCTTGCTCAGTGGGTTAACGATCCGGTATTGCCCTGAGCTGTGGTGCAGGTTGTAGACGTGGCTCTGATCCCATGTTGCTGTGGCTCTGGTGTAGGCCGGTGGCTACAGCTCCGATTGGACCCCTAGCCTGGGAACCTCCATTTGCCGCGGGAGCTGCCCAAGCAAAAAGACAAAAAAAAAAAAAAAA	C	7	WXP5,LW5,LA6,DU3	-	-	intergenic_variant	MODIFIER	-	-	-	1	0	3	4
sv_00185	1	12149262	12149564	302	DEL	CAAAGAAACTGGAGTTCCCGTCGTGGCGCAGTGGTTAACGAATCCGACTAGGAACCATGAGGTTGCGGGTTCGATCCCTGCACTTGCTCAGTGGGTTAACGATCCGGCGTTGCCGTGAGCTGTGGTGTAGGTTGCAGACGCGGCTCGGATCCCACATTGCTGTGGCTCTGGCGTAGGCCGGTGGCTACAGCTCCAATTCAACCCCTAGCCTGGGAACCTCCATATGCCGCGGGAGCGGCCCAAGAAATAGCAACAATAACAACAACAACAACAAAGACAAAAAGACAAAAAAAAAAAAAAAAA	C	20	WXP4,WXP5,WXP6,WXP7,XP2,XP3,XP6,XP7,LW4,LA5,LA6,LA7,DU2,DU4,DU5,DU7	-	-	intergenic_variant	MODIFIER	-	-	-	4	4	8	16
sv_00186	1	12167734	12168044	310	DEL	TTAATCTAACTTCTTTTTTTTTTTTTTTTTTTGGTCTTTTTGTCTTTTGTCTTTTGTTGTTGTTGTTGTTGCTATTTCTTGGGCCGCTCCCGCGGCATATGGAGGTTCCCAGGCTAGGAGTCGAATCGGAGCTGTAGCCACCGGCCTACACCAGAGCCACAGCAACACGGGATCCGAGCCGCGTCTGCAACCTACACCACAGCTCACGGCAACGCGGGATCGTTAACCCACTGAGCAAGGGCAGGGACGGAACCCGCAACCTCATGGTTCCTAGTCGGATTCGTTAACCACTGCGCCACGACGGGAACTCC	T	14	WXP4,WXP5,WXP6,WXP7,XP1,LW4,LW5,LW6,LW7,LA7,DU5	-	-	intergenic_variant	MODIFIER	-	-	-	4	1	6	11
sv_00187	1	12168139	12168418	279	DEL	GCTGAGTAGAATTCTTTTTTTTTTTTTTTTTGTCTTTTTGCTATTTCTTTGGGCCGCTCCTGTGGCATATGGAGGTTCCCAGGCTAGGGGTCGAATCGGAGCTGTAGCCACCGGCCTACGTCAGAGCCTCAGCAACGTGGGATCCGAGCCGCGTCTGCAACCTACACCACAGCTCACGGCAACGCGGGATCGTTAACCCACTGAGCAAGGGCAGGGACCGAACCCGCAACCTCATGGTTCCTAGTCGGATTTGTTAATCACTGTGCCACGACGGGAACTC	G	8	WXP6,XP2,XP7,DU5	-	-	intergenic_variant	MODIFIER	-	-	-	1	2	1	4
sv_00188	1	12189373	12189645	272	DEL	ATCTTTTTTTTTTGCCTTTTTTTTTGCTATTTCTTTGGGCCGCTTCCGTGGCGTATGGAGGTTCCCAGGCTAGGGGTCCAATCGGAGCCGTAGCCACCGGCCTACGCCAGAGCCGCAGCAACGCGGGATCCGAGCCGCGTCTGCAACCTACACCACAGCTCACGGCAACGCCGGATCGTTAACCCACTGAGCAAGGGCAGGGACCGAACCCGCGACCTCATGCTTCCTAGTCGGATTTGTTAACCACTGCGCCACGACGGGAACTCCACGTTC	A	7	XP3,LW4,LW5,LA5	ENSSSCG00000044991	ENSSSCT00000087929.1	upstream_gene_variant	MODIFIER	-	protein_coding	DISTANCE=3280,STRAND=-1	0	1	3	4
sv_00189	1	12207414	12207686	272	DEL	CAAAAAAACCCCCTCTAGGAGTTCCCGTCGTGGCGCAGTGGTTGACGAATCCGACTAGGAACCATGAGGTTGCGGGTTCGGTCCCTGCCCTTGCTCAGTGGGTTAACGATCCGGCGTTGCCGTGAGCTGTGGTGTAGGTCGCAGATGTGGCTCGGATCCCGCGTTGCTATGGCTCTGGCGTAGGCTGGTGGCCCCAGCTCCGATTCAACTCCTAGCCTGGGAACCTCCATATGCCGCAGGAGCGGCCCAAGAAATGGCAAAAAGACAAAAAAA	C	11	WXP3,WXP4,WXP5,WXP6,WXP7,XP1,XP2,XP3,XP4,XP6,LW6,LW7,LA7	-	-	intergenic_variant	MODIFIER	-	-	-	5	5	3	13
sv_00190	1	12238293	12238592	299	DEL	TTGGATCTGTTGCTTTTACTTTTTTTTTTTTAATTAATTAATTTATTTTTTTGTCTTTTTGCCATTTCTTGGGCCCCTCCCGCGGCATATGGAGGTTCCCAGGCTAGGGGTCCAATCGGAGCTGTAGCCACCAGCCTACGCCAGAGCCACAGCAACTCAGGATCCAAGCCGCGTCTGCGACCTACACCACAGCTCACGGCAACGCCAGATCGTTAACCCACTGAGCAAGGGCAGGGACCAAACCCGAAACCTCATGGTTCCTAGTCGGATTTGTTAACCAATGCGCCACGACGGAACTCC	T	11	XP1,XP2,XP7,LA6,LA7,DU7	-	-	intergenic_variant	MODIFIER	-	-	-	0	3	3	6
sv_00191	1	12268240	12268461	221	DEL	GCCACCGCCACCCTCGGATGGGGTCTCAGAAAAATACCTCAGAGTGGGGACACCTCCTGAGGTGCAGCCTCAGCTTCTGCGAGAGAACAAAGCTGAGTCAGCCTGGGGCCTGTGAGGCCCAGCAAGGTGACCTGTGGCACCCAGGGGCGGGGAAGGGGCCCCAGGGGAGCCCACGTTGGGTGGAGTCAGCTGGGGTGGACTGGGACTGGGAGCATAATTATA	G	6	WXP4,WXP5	-	-	intergenic_variant	MODIFIER	-	-	-	2	0	0	2
sv_00192	1	12337302	12337412	110	DEL	GAGGGGCGGTGGTTAGTGGGTGGTTGGGGGTGATGGTGGAGGCTTCAGTGGCCTTTGGGGAGGGTGAGGTAGGTGGTTCCTGGAAGATTTCAGCAGCTGTTGTTTCCCCTA	G	5	WXP4,WXP5	ENSSSCG00000004071	ENSSSCT00000004500.4	intron_variant,feature_truncation	MODIFIER	CNKSR3	protein_coding	INTRON=1/12,STRAND=1	2	0	0	2
sv_00193	1	12357641	12357936	295	DEL	TAATAAAGTATAATTGTAGGAGTTCCCGTCGTGGCGCAGTGGTTAACGAATCCGACTAGGAACCATGAGGTTGCGGGTTCGGTCCCTGCCCTTGCTCAGTGGGTTAACGATCCGGCGTTGCCGTGAGCTGTGGTGTAGGTTGCAGACGCGGCTCGGATCCCGAGTTGCTGTGGCTCTGGCGTAGGCCAGTGGCTACAGCTCCGAATAGACCCCTAGCCTGGGAACCTCCATATGCCGCAGGAGCGGCCCAAAGAAACAGCAAAAAGACAAACAAACAAACAAAAACAAAAACAAAA	T	6	LW7,DU5	ENSSSCG00000004071	ENSSSCT00000004500.4	intron_variant,feature_truncation	MODIFIER	CNKSR3	protein_coding	INTRON=2/12,STRAND=1	0	0	2	2
sv_00194	1	12377100	12377376	276	DEL	ACTAAAAATGCTTTTCTTTTTTTTTTTTTTTTTGTCTTTTTTTGTTGTTGCTATTTCATGGGCCGCTCCCGCGGCATATGGAGGTTCCCAGGCTAGGGGTTGGGCCACCGGCCTACGCCAGAGGCACAGCAACGCAGGATCCGAGCCGCGTCTGCAACCTACACCACAGCTCACGGCAACGCCGGATCGTTAACCCACTGAGCAAGGGCAGGGACCGAACCCGCAACCTCATGGTTCCTAGTCGGATTCGTTAACCACTGCGCCACTACGGGAACTC	A	13	WXP1,WXP5,WXP6,WXP7,XP5,XP6,LW7	ENSSSCG00000004071	ENSSSCT00000004500.4	intron_variant,feature_truncation	MODIFIER	CNKSR3	protein_coding	INTRON=7/12,STRAND=1	4	2	1	7
sv_00195	1	12385257	12385558	301	DEL	ACCTTCTTTAGTTCTTTTTTTTTTTTGTCTTTTGTCTTTTTGCCTTTTTGTTGTTGTTGTTGCTATTTCTTGGGCCGCTCTCGCGGCATATGGAGGTTCCCAGGCTAGGGGTTGAATCGGAGCTGTAGCCACCAGCCTACGCCAGAGCCACAGCAACGCGGGATCCGAGCCGCGTCTGCAACCTACACCACAGCTCACGGCAACGCCGGATCGTTAACCCACTGAGCAAGGGCAGGGACCGAACCCGCAACCTCATGGTTCCTAGTCGGATTCGTTAACCACTGCGCCACGATGGGAACTCC	A	10	WXP3,WXP4,WXP5,WXP6,XP1,XP3,XP4,XP5,XP6,XP7,LW4,LW6,LW7,LA7	ENSSSCG00000004071	ENSSSCT00000004500.4	intron_variant,feature_truncation	MODIFIER	CNKSR3	protein_coding	INTRON=9/12,STRAND=1	4	6	4	14
sv_00196	1	12436568	12436859	291	DEL	GCTCCTGTGGGATTCTTTTTTTTTTTTTTTTTTTTTTTTTTTGGTCTTTTTGCTATTTCTTTGGGCCGCTCCCGCGGCATATGGAGGTTCCCAGGCTAGGGGTCGAATTGGAGCTGTAGCCACTGGCCTACGCCAGAGCCACAGCAACGAGGGATCTGAGCCGCGTCTGCAACCTACACCACAGCTCACGGCAATGCCAGATCCTCAACCCACTGAGCAAGGGCAGGGACCGAACCCGCAACCTCATGGTTCCTAGTCGGATTCGTTAACCACTGCACCACGATGGGAACTC	G	11	WXP4,WXP5,XP5,XP6,XP7,LA7	-	-	intergenic_variant	MODIFIER	-	-	-	2	3	1	6
sv_00197	1	12490179	12490475	296	DEL	CAGGAGTTCCCGTCGTGGCGCAGTGGTTGACGAATCCGTCTAGGAACCATGAGGTTTCGGGTTCAGTCCCTGCCCTCGCTCAGTGGGTTAACGATCCGGCGTTGCTGTGAGCTGTGGTGTAGGTCGCAGACGCGGCTCGGATCCCGCGTTGCTGTGGCTCTGGTGTAGGCCGGTGGCTACAGCTCCGATTCAACTCCTAGCCTGGGAACCTCCATATGCCGCGGGAGCGGCCCAAGAAATAGCAACAACAACAACAAAAGACAAAAAGACAAAAAAAAAAAAAAACGGAAAATGTTT	C	22	WXP1,WXP2,WXP4,WXP5,WXP6,WXP7,XP2,XP3,XP4,XP5,XP6,XP7,LW4,LW5,LW6,LA4,LA5,LA6,LA7	ENSSSCG00000049297	ENSSSCT00000080620.1	upstream_gene_variant	MODIFIER	-	lncRNA	DISTANCE=4968,STRAND=-1	6	6	7	19
sv_00198	1	12515853	12516041	188	DEL	AAAGGTGGTGCCAGGGTTAATTCTTATATTGCGTCACTTTCGCCATTGGAAAAAAAGGCAGTCTTCCAACTGGAAAGAGTTCATCTTATATTTAAGAGGAGACAGAAATTAAGATAATAAGGGACAAACTGTTGCCTTTGGAATGGACTAGCAATGAGATCCTGCTGTGTAGCACTGGGCACTCTGTCT	A	15	WXP2,WXP7,XP1,XP4,XP5	-	-	intergenic_variant	MODIFIER	-	-	-	2	3	0	5
sv_00199	1	12540601	12540928	327	DEL	TAAAACTTTTCCATCTTGGAGTTCCCGTCGTGGCGCAGTGGTTAACGAATCCGACTAGGAACCATGAGGTTGCGGGTTCGGTCCCTGCCCTTGCTCAGTGGGTTAACGATCCGGCGTTGCCGTGAGCTGTGGTGTAGGTTGCAGATGTGGCTCGGATCCCGTGTTGCTGTGGCTCTGGCGTAGGCCGGTGGCTACAGCTCCGATTCGACCCCTAGCCTGGGAACCTCCATATGCCGCGGGAGCGGCCCAAGAAATAGCAACAACAACAACAACAACAAAAGACAAAAAATTAAAAATAAATAAATAAATAAATAAAAATTAAAAAAAA	T	8	XP1,XP4,XP7,LW4,LA5,LA6,LA7,DU1,DU3,DU7	ENSSSCG00000004074	ENSSSCT00000004503.4	intron_variant,feature_truncation	MODIFIER	OPRM1	protein_coding	INTRON=3/4,STRAND=-1	0	3	7	10
sv_00200	1	12616819	12617124	305	DEL	GCTTCTCACTCTTTTCTTTTTCTTTCTTTTCTTTTTTTTTTTTTTTTTTGTATTTTTGTCTTTTTGCTATTTATCTGGGTCAATCCTGTGGCATATGGAGGTTCCCAGGCTAGGGGTCCAATGGGAGCTGTAGCCACCGGCCTACACCAGAGCCACAGCAACGCAGGATCCGAGCCACATCTGCAAACTACACCACAGCTCACGGCAACGCCGGATCGTTAACCCACTGAACAAGGGCAGGGACCGAACCCGCAACCTCATGGTTCCTAGTCGGATTCGTTAACCACTGCGTCACGACGGGAACGC	G	7	WXP6,WXP7,XP1,XP2,XP3,XP5,XP6,XP7,LA5,DU2	ENSSSCG00000004074	ENSSSCT00000004503.4	intron_variant,feature_truncation	MODIFIER	OPRM1	protein_coding	INTRON=3/4,STRAND=-1	2	6	2	10
sv_00201	1	12705998	12706187	189	DEL	ATGAGCATATTTCTTTTTTTAATATATATTTTTTTTATTTTCCCACAGTACAGCAAGGGGGTCAGGTTATCCTTACATGTATACATTGCAATTACATTTTTTCCCCCACCCTTTCTTCTGTTGCAACATGAGTATCTAGACAAAGTTCTCAATGCTATTCAGCAGGATCTCCTTGTAAATCTATTCTAAC	A	9	WXP2,WXP4,WXP6,XP5,LW7	ENSSSCG00000004074	ENSSSCT00000004503.4	upstream_gene_variant	MODIFIER	OPRM1	protein_coding	DISTANCE=3555,STRAND=-1	3	1	1	5
sv_00202	1	12774863	12775059	196	DEL	CTCATGGAGTCCATCCCAATATTAGACATCAATCACCTCGTGATTCCTCTGACAGCCTGAAGGTACCATTGTTCCTGCTCACCAACTCTCACCTCAGCTTCTGGTCATCTAGTGATACCTCTAGCTTCAGTTACTGGACTCTCTTTACTTCTCCAGGTGGTCTCATTTAAAAGACCTCACACAAGCCTTTTTTTGCA	C	18	WXP1,WXP3,WXP4,WXP5,WXP6,XP2,XP3,XP4,XP6,XP7,LW5,LW6	-	-	intergenic_variant	MODIFIER	-	-	-	5	5	2	12
sv_00203	1	12825357	12825572	215	DEL	TAAGAAAAGTAAAGGACGGGAGCTTGGGCTTATCAGACACAACTTAGAATAGATTTACAAGGAGATCCTGCTGAATAGCATTGAGAACTTTGTCTAGATACTCATGTTGCAACAGAAGAAAGGCTGGGGGAAAAATGTAATGTATACATGTAAGGATAACCTGACCCCCTTGCTGTATAGTGGGAAAATTAAAAAAAAGAAAAAAAAGAAAAGAAA	T	12	WXP3,WXP4,WXP5,XP1,XP6,LW6,LW7	-	-	intergenic_variant	MODIFIER	-	-	-	3	2	2	7
sv_00204	1	12835742	12836073	331	DEL	TTGGAAATCATTTCTTTTTTTTTTTTTTTTTTTTACCATTTTATTTTATTTATTTATTTATTTATTTTTATTTTATTTTTTTGTCTTTTTGCTATTTCTTTGGGCCGCTCCCACTGCATATGGAGGTTCCCCGGCTAGGGGTCGAATCGGAGCTGTAGCCACTGGCCTACGCCAGAGCCACAGCAACGTGGGATCCGAGCCGCGTCTGCAACCTACACCACAGCTCACGGCAACGCCGGATCGTTAACCCACTGAGCAAGGGCAGGGACCGAACCCGCAACCTCATGGTTCCTAGTCAGATTCGTTAACCACTGCGCCACGACGGGAACTCC	T	18	WXP1,WXP4,WXP5,WXP7,XP1,XP2,XP3,XP4,XP6,LW6,LW7,DU1,DU4	-	-	intergenic_variant	MODIFIER	-	-	-	4	5	4	13
sv_00205	1	12871375	12871459	84	DUP:TANDEM	GCTGATCAGGGAAGGAAGGGGATGCCAAGACAAGGGGGCAACAGTCAAGAAATAATAATGTAGCCTTGGGGCAGGATCCTGGTTC	GCTGATCAGGGAAGGAAGGGGATGCCAAGACAAGGGGGCAACAGTCAAGAAATAATAATGTAGCCTTGGGGCAGGATCCTGGTTCCTGATCAGGGAAGGAAGGGGATGCCAAGACAAGGGGGCAACAGTCAAGAAATAATAATGTAGCCTTGGGGCAGGATCCTGGTTC	5	WXP6,XP7,LW7,LA4,DU7	-	-	intergenic_variant	MODIFIER	-	-	-	1	1	3	5
sv_00206	1	12871375	12871375	84	INS	G	GCTGATCAGGGAAGGAAGGGGATGCCAAGACAAGGGGGCAACAGTCAAGAAATAATAATGTAGCCTTGGGGCAGGATCCTGGTTC	3	XP3,XP6,LW1,LW2,LW3	-	-	intergenic_variant	MODIFIER	-	-	-	0	2	3	5
sv_00207	1	12894955	12895032	77	DEL	GGGAAGAAGCAAAAAAAAAAAAAAAAAAAAAAAAAAAAAAAAAAAAAAAAAAAAAAAAAAAAAAAAACTCTGAAATAT	G	20	WXP1,WXP2,WXP3,WXP6,WXP7,XP1,XP2,XP3,XP4,XP5,XP6,XP7,LW1,LW2,LW4,LW5,LW6,LW7,LA1,LA2,LA3,LA5,LA6,LA7,DU2,DU3,DU4,DU5,DU6,DU7	-	-	intergenic_variant	MODIFIER	-	-	-	5	7	18	30
sv_00208	1	12902992	12903302	310	DEL	CTGGGTACAGAATTCTTTTTTTTTTTTTTTTTTTTTTTTTTTTTTTTTTTTTTTTTTGTCTTTTTTGTTGTTTTTTGTTGTTGTTGTTGCTATTTCTTGGGCTCCTCGCATATGGAGGTTCCAGCTAGGGTTGAATCGGAGCTGTAGCCACCAGCCTACGCCAGAGCCACAGCAACGCGGATCCGAGCCGCGTCTGCAACCTACACCACAGCTCACGCAACACCAATCGTTACCACTGAGCAGGGCAGGACCGACCCGCACCTCATGGTTCCTAGTCGATTCGTTACCACTGCGCCACGACGGGAACTCCT	C	16	XP4,XP6,LW7,DU3	-	-	intergenic_variant	MODIFIER	-	-	-	0	2	2	4
sv_00209	1	12919304	12919776	472	DEL	TGAGTATTGATATCCCAGTCATAATTGTGGGTATATCTATTTCTCCATTTACTTCTCTATTAGCTTTTTCTTCACATTATCTGATATAAGTCACCATTTAAAAAAAATGTCCCTGAGAGAAATCCCAAAAACACATTAATATAAGCTCTAGGAGTCCTTGGTGAGGGCACTAAACCTCAGCAATAAAATTTTGCCCCATATAACAAAATTTATCTTATCCAAGTTTAAATTCCAGCACTTCAGATCAGCATCTTCAATATCTAGTCCTAGTTTCTGTCAGTACCCACTAGTGACATCTTTCATTACGTAATCCTCTTGCACTTCTTTAAACACACAGGGTGAAAGAGAATCTGGAGGGTCGATGTTCTTAAATTTATCTACCCAGGCTTTACTATCTCA…	T	17	WXP7,XP1,XP2,XP3,XP6,LW4,LW5,LW7,LA5,LA6,LA7,DU2,DU3,DU4,DU5,DU7	-	-	intergenic_variant	MODIFIER	-	-	-	1	4	11	16
sv_00210	1	12923840	12924131	291	DEL	TAGTGATTTTATTTCATTTTTTTTTAATTTTTATTTATTTATTTATTTTTTGCTATTTCTTGGGCGGCTCCCGCGGCATATGGAGATTCCTAGGCTAGGGGTCTAATCGGAGCCGTAGCCACCAGTCTACGCCAGAGCCACAGCAACGCAGGATCTGAGCCGCGTCTGCAACCTACACCACAGCTCACGGCAACGCCGGATCGTTAACCCACTGAGCAAGGGCAGGGACTGAACCTGCAACCTCATGGTTCCTAGTCGGATTCGTTAACCACTGCGCCACGACGGGAACACC	T	5	XP2,XP3,XP5	-	-	intergenic_variant	MODIFIER	-	-	-	0	3	0	3
sv_00211	1	12932815	12933105	290	DEL	AAAAAATAGTTAAAGGGAGTTCCCGTCGTGGCGCAGTGGTTAACGAATCCGACTAGGAACCATGAGGTTGCGGGTTCGGTCCCTGCCCTTGCTCAGTGGGTTAACGATCTGGCTTTGCCGTGAGCTGTGGTGTAGGTTGCAGACGCGGCTCAGATCCCGCGTTGCTGTGGCTCTGGCGTAGGCTGGTGGCTACAGCTCTGATTAGACCCCTAGCCGGGGAACCTCCATATGCCACGGGAGCGGCCCAAAGAAATAGCAAAAAGCCAAAAAGCCAAAAAAAAAATAAAAATG	A	5	WXP4,XP2,DU4,DU6	-	-	intergenic_variant	MODIFIER	-	-	-	1	1	2	4
sv_00212	1	12935700	12935989	289	DEL	ACAGATTCATTTCTTTTTTTTTTTTTTTTTTTTGTCTTTGTTATTGTTGCTATTTCTTGGGCCTCTCCCGCGGCATGTGGAGGTTCCCAGGCTAGGGGTTGAATCGGAGCTGTAGCCACCGGCCTACGCCAGAGCCACAGCAGTGTGGGTTCCGAGCCGCGTCTGCAACCTACACCACAGCTCACGGCAAAGCCAGATCGTTAACCCACTGAGCAAGGGCAGGGACCGAACTCGCAACCTCATGGTTCCTAGTCGGATTCGTTAACCACCGCGCCATGACGGGAACTCCC	A	16	WXP3,WXP4,WXP5,WXP6,WXP7,XP3,XP4,XP5,XP6,XP7,LW4,LW5,LW6,LW7,LA4,LA5,LA6,LA7,DU5,DU7	-	-	intergenic_variant	MODIFIER	-	-	-	5	5	10	20
sv_00213	1	12953361	12953423	62	DEL	AATCTCTTTACTCTTATTGGTATACCCTTTTTTTTTTTTTAACACTCGAGGTCACTTAGTTAC	A	19	XP2,XP3,XP5,XP6,LW6,LW7,DU4	-	-	intergenic_variant	MODIFIER	-	-	-	0	4	3	7
sv_00214	1	12993571	12994050	479	DEL	CTTGATAAAGTCCCTATCACTACATGGATTTTATAGTCCAATACTTTCAAATTGGCCTTGGAGTCTCTGAGGAACAATAGCTCTTAGAATTTCCAAAGAAATTTAGAGATTGGAAACATCATTTGGGATTCCCTATTGAAAATAAGCATGCTAGCTGTGGGGATGCCTGACTTCTAAAAAAATTCCTGGATTTCTCTTTGTTGTATGTCAGAATACACAATTATTCACATGAACCTCAATTAAACTCAATTCTACATTGCTCGGGGCTTTATTAATTAGATCATACATTTTCCAATCCCTGTCTGCTCCTAGAGACCATATATCTTCTAAAGTTTTCAACTCATGTTGGGTTTATAATTTAAAATAAAGTTGAAAATTTCAATATACAGTGGAGTTTTA…	C	7	WXP4,XP3,XP6,LA7	-	-	intergenic_variant	MODIFIER	-	-	-	1	2	1	4
sv_00215	1	13032284	13032588	304	DEL	AAAATAAATAGGCCAGCTGGAGTTCCCGTCGTGGCGCAGTGGTTAACGAATCCGACTAGGAACCATGAGGTTGCGGGTTCGATCCCTGCCCTTGCTCAGTGGGTTAACGATCCGGCGTTGCCATGAGCTGTGGTGTAGGTTGCAGACGCGGCTCGGATCCCGCGTTGCTGTGGCTCTGGCGTAGGCCGGTGGCTACAGCTCCGATTCAACCCCTAGCCTGGGAACCTCCATATGCCGCGGGAGCGGCCCAAGAAATAGCAACAATAACAACAACAAAAAGATAAAAGACAAATAAATAAATAAAT	A	21	WXP2,WXP3,WXP4,WXP5,WXP7,XP1,XP2,XP3,XP4,XP5,XP6,XP7,LW6,LW7,LA7,DU4,DU7	ENSSSCG00000041027	ENSSSCT00000090721.1	upstream_gene_variant	MODIFIER	-	lncRNA	DISTANCE=3065,STRAND=-1	5	7	5	17
sv_00216	1	13049453	13049731	278	DEL	TCAAAAAGTCAGTTTTTTTTTTTTTTTTTGTCTTTTTTTGCTATTTCTTGGGCCGCTCCCGCGGCATATGGAGGTTCCCAGGCTAGGGTTCGAATCGGAGCTGTAGCCACCGGCCTACGCCAGAGCCACAGCAACGCGGGATCCGAGCTGAGTCTGCAACCTACACCACAGCTCACGGCAACGCCGGATTGTTAACCCACTGAGCAAGGGCAGGGACCGAACCCGCAACCTCATGGTTCCTAGTCGGATTCGTTAACCACTGCACCACGACAGGAACTC	T	16	WXP4,WXP6,XP6,LW5	-	-	intergenic_variant	MODIFIER	-	-	-	2	1	1	4
sv_00217	1	13068533	13068821	288	DEL	TAATCAATATGGGAGTTCCCGTCGTGGCGCAGTGGTTAACGAATCCGACTAGGAACCATGAGGTTGCGGGTTCGGTCCCTGCCCTTGCTCAGTGGGTTAATGATCCGGCGTTGTCGTGAGCTGTGGTGTAGGTTGCAGACGCGGCTTGGATCCCGCATTGCTGTGGCTCTGGTGTAGGCCGGTGGCTACAGCTCCGATTCAACCCCTAGCCTGGGAACCTCCATATGCCGAGGGAGCGGCCCAAGAAATAGCAACAACAACAAAAGACAAAAAAAAAAAAAAAAAAAAA	T	12	XP3,LW5,LW7,DU7	-	-	intergenic_variant	MODIFIER	-	-	-	0	1	3	4
sv_00218	1	13071964	13072294	330	DEL	ACACAGTTGGGGAGTTCCCGCCGTGGCGCAGTGGTTAACGAATCCGACTAGGAACCATGAGGTTGCGGGTTCGGTCCCTGCCCTTGCTCAGTGGGTTAACAATCCGGCGTTGCCGTGAGCTGTGGTGTAGGTTGCAGACGCGGCTCGGATCCTGCGTTGCTGTGGTTCTGGTGTAGGCCGGTGGCTACAGCTCTGATTGGACCCCTAGCCTGGGAATCTCCATATGCCGCGGAAGCGGCCCAAGAAATCGGAAGCGGCCCAAGAAATAGCAAAAAGACCAAAAAAAAAAAAAAACCAAGAAATAGCAAAAAGACCAAAAAAAAAAAAAAAC	A	17	WXP2,WXP4,WXP6,WXP7,XP1,XP2,XP3,XP4,XP6,XP7,LW4,LA6,LA7,DU1,DU4	-	-	intergenic_variant	MODIFIER	-	-	-	4	6	5	15
sv_00219	1	13096681	13096997	316	DEL	TAAAAAAGAGTTAGAGGGAGTTCCCGTCGTGGCGCAGTGGTTAACGAATCCGACTAGGAACCATGAGGTCGCGGGTTCGGTCCCTGCCCTTGCTCAGTGGGTTAACGATCTGGCGTTGCCGTGAGCTGTGGTGTAGGTTGCAGACGCGGCTCGGATCCCGAGTTGCTGTGGCTCTGGCGTAGGCCGGTGGCTACAGCTCCGATTCAACCCCTAGCCTGGGAACCTCCATATGCCGCGGAAGCGGCCCAAGAGATAGCAACAACAACAACAACAACAACAACAAAGACAAAAGACAAAAAAAAAAAAAAAAAAAAAAA	T	12	WXP2,WXP6,WXP7,XP1,XP3,XP4,XP5,XP6,XP7	-	-	intergenic_variant	MODIFIER	-	-	-	3	6	0	9
sv_00220	1	13100442	13101099	657	DEL	CAAAATGTCACTTTATTAAAAACAAACAAAACAAAACAAAAATATCCCAATGAACATGTCACATCAGAAAGAGAAGCTGGGCCTCCAGGACAGCCTTATATTTGCTCCTTCAACCCTCGTGAAGAAAAAGAAAGAAAAAGAAAGAAAATCTACATTCTCATGGTTTAAACTGCTTGCAGGTGGATTTTGTGTAACTGCAGTTATAAAAGTGACTAACAGACATAATCTTTTCTACTACTTGATCTTTAACCAATATGCATTTAGTATTTTTATTAAAAGTTTAAATATTAAACTGAAAAAGTACAAATTCAATCATCTGGAGAATCCCTGTCTATGAAAAGTTTATAACCGAAAGATGAAACTCAAAAGCCCTTTTTCGGTTACATAGGCCCAAAGAGA…	C	30	XP1,XP3,XP6,DU7	-	-	intergenic_variant	MODIFIER	-	-	-	0	3	1	4
sv_00221	1	13158482	13158565	83	DEL	TGATATTTATTTTATTTTATTTTATTTTATTTATTTATTTTTTTTTTTATTTTCCCACTGTACAGCAACGGGGTTATCCTTACA	T	7	WXP2,XP7,LW6,LW7,LA7	-	-	intergenic_variant	MODIFIER	-	-	-	1	1	3	5
sv_00222	1	13164713	13164986	273	DEL	TATGCCACCCTGGAGTTCCCATCGTGGCACAGTGGTTAACGAATCCGACTAGGAACCATGAGGTTTCGGGTTCGGTCCCTGCCCTTGCTCAGTGGGTTAACGATCCGGCGTTACCGTGAGCTGTGGTGTAGGTTGCAGACGCGGCTCGGATCCCGCGTTGCTGTGTCTCTGGCGTAGGCTGGTAGCTACAGCTCCGATTCTACCCCTAGCCTGGGAACCTCCATATGCCGTGGGAGTGGCCCGAGAAATGGCAAAAAGACAAGAAAAAAAAAAA	T	5	XP6,LW4	-	-	intergenic_variant	MODIFIER	-	-	-	0	1	1	2
sv_00223	1	13173994	13174297	303	DEL	TAAGAAATGCAAGATGTGGGAGGAGTTCCTGTTGTGGCGCAGTGGTTAACGAATCCGACTAGGAACCATGAGGTTGCGGGTTCGGTCCCTGCCCTTGCTCAGTGGGTTAACGATCCGGCGTTGCCGTGAGCTGTGGTGTAGGTTGCAGATGCGGCTCGGATCCCGCGTTGCTGTGGTTCTGGCGTAGGCCGGTGGCTACAGCTCCGATTCAACCCCTAGCCTGGGAACCTCCATATGCCGCGGGAGCGGCCCAAGAAATAGCAACAACAACAACAAAAGACAAAAAGACAAAAAAAAAAAAAAA	T	7	XP2,LA7	ENSSSCG00000050641	ENSSSCT00000076414.1	downstream_gene_variant	MODIFIER	-	lncRNA	DISTANCE=4548,STRAND=-1	0	1	1	2
sv_00224	1	13287864	13288137	273	DEL	TGCTATATTGGGAGTTCCCGTCGTGGCGCAGTGGTTAACGAATCCGACTAGGAACCATGAGGTTGCGGGTTCGGTCCCTGCCCTTGCTCGGTGGGTTAACGATCCGGCGTTGCCGTGAGCTGTGGTGTAGGTTGCAGACGCGGCTCGGATCCTGCGTTGCTGTGGCTCTGGCCTAGGCTGGTGGCTACAGCTCCGATTGGACCCCTAGCCTGGGAACCTCCATATGCCGCGGGAGCGGCCCAAGAAATAGCAAAAAGACAAAAAAAAAAAAAAA	T	6	XP3,XP6,LW4	-	-	intergenic_variant	MODIFIER	-	-	-	0	2	1	3
sv_00225	1	13315791	13316249	458	DEL	TAAGAGCTGTGTGGGAGTTCCCGTCGTGGCGCAGTGGTTAACGAATCCGACTAGGAACCATGAGGTTGCCGGTTTGGTCCCTGCCCTTGCTCAGTGGGTTAACGATCCGGCGTTGCCGTGAGCTGTGGTGTAGGTTGCAGACGCGGCTCGTATCCCGCGCTGCTGTGGCTCTGGCGTAGGCCGGTGGCTACAGCTCCGATTCAACCCCTAGCCTGGGAACCTCCATATGCCGCAGGAGCGGCCCAAGAAATAGCAACAACAACAACAACAACAACAACAACAAGAAAGACAAAAAGACAAAAAAAAAAAAAAGCAGTGGGGGATCTGAAAAGATTCAGGAAAAGGTACCTTTGGGCAGTGGGAACAGTACTTAGAAAACAAGACCAAGCGATTCATCTC…	T	16	WXP4,XP2,DU7	-	-	intergenic_variant	MODIFIER	-	-	-	1	1	1	3
sv_00226	1	13323696	13323999	303	DEL	AATATAGGAATATAGGAGTTCCCGTCGTGGCGCAGTGGTTAACGAATCCGACTAGGAACCATGAGGTCGCGGGTTCGGTCCCTGCCCTTGCTCAGTGGGTTAACGATCCGGCGTTGCCGTGCGCTGTGGTGTAGGTTGCAGACGCGGCTCGGATCCTGCGTTGCTGTGGCTCTAGCGTAGGCCGGCAGCTACAGCTCCGATTGGACCCCTAGCCTGGGAACCTCCATATGCCGTGGGAGCGGCCCAAGAAATAGCAACAACAACAACAACAAAAAAGACAAAAAGACAAAAAAAAAAAAAAAAT	A	7	WXP2,WXP5,WXP6,WXP7,XP2,XP3,XP5,XP6,DU7	-	-	intergenic_variant	MODIFIER	-	-	-	4	4	1	9
sv_00227	1	13368880	13369211	331	DEL	CAGAACTAGCCTTCTTTTTTTTTTAATTTTTTATTTTTTTATTTTATTTTTTTTTTATAATTTTTTTTTTTTATTTTCCCACTGTACAGCAAGGGGGTCAGGTTATCCTTACATGTATACATTGCAATTACATTTTTTCCCCCACCCTTTCTTCTGTGGCAACATGAGTATTTAGACAAAGTTCTCAATGCTATTCAGCAGGATCTCCTTGTAAATCTATTCTAAGTTGTGTCTGATAAGCCCAAGCTCCTGATCCCTCCCACTCCCTCCCCCTCCCATCAGGCAGCCACAAGTCTCTTCTCCAAGTCCATGATTTTCTTTTCTGAGGAGGT	C	6	LW6,LW7	ENSSSCG00000004075	ENSSSCT00000004504.4	intron_variant,feature_truncation	MODIFIER	RGS17	protein_coding	INTRON=1/4,STRAND=1	0	0	2	2
sv_00228	1	13430610	13430687	77	DUP:TANDEM	GAACTAGCCTCCACCCAGCAGATGTTTGCCAGGTCAGGCTGAACTGAGTCTCAGTGACCACTAGGTGGCAGTAATTGA	GAACTAGCCTCCACCCAGCAGATGTTTGCCAGGTCAGGCTGAACTGAGTCTCAGTGACCACTAGGTGGCAGTAATTGAAACTAGCCTCCACCCAGCAGATGTTTGCCAGGTCAGGCTGAACTGAGTCTCAGTGACCACTAGGTGGCAGTAATTGA	6	LW6,LW7,DU1,DU2,DU7	ENSSSCG00000004075	ENSSSCT00000004504.4	intron_variant	MODIFIER	RGS17	protein_coding	INTRON=3/4,STRAND=1	0	0	5	5
sv_00229	1	13430610	13430610	77	INS	G	GAACTAGCCTCCACCCAGTAGATGTTTGCCAGGTCAGGCTGAACTGAGTCTCAGTGACCACTAGATGGCAGTAATTGA	5	WXP4,WXP6,WXP7,XP1,XP2,XP5,XP6,XP7,LW5	ENSSSCG00000004075	ENSSSCT00000004504.4	intron_variant,feature_elongation	MODIFIER	RGS17	protein_coding	INTRON=3/4,STRAND=1	3	5	1	9
sv_00230	1	13564514	13564826	312	DEL	TCCCCCTGATTATTTTTATTTATTTATTTATTTATTTTTTGTCTTTTGTCTGTTGTTGTTGTTGTTGTTGTTGCTATTTCTTGGGCCGCTCCCGCGGCACATGGAGGTTCCCAGGCTAGGGGTCAAATCGGAGCTGCAGCCGCCGGCCTACGCCAGAGCCACAGCAACGCGGGATCCGAGCCGCATCTGCAACCTACACCACAGCTCACGGCAACGCCGGATCGTTAACCCACTGAGCAAGGGCAGGGACCGAACCCGCAACCTCACGGTTCCTAGTCGGATTCGTTAACCACTGCGCCACGACGGGAACTCC	T	4	WXP7,XP1	-	-	intergenic_variant	MODIFIER	-	-	-	1	1	0	2
sv_00231	1	13583753	13584032	279	DEL	TAGTTTTGTGGAGTTCCCGTCGTCGCGCAGTGGTTAACGAATCCGACTAGGAACCATGAGGTTGCGGGTTCGGTCCCTGCCCTTGCTCAGTGGGTTAACGATCCGGCGTTGCTGTGAGCTGTGGTGTAGGTTGCAGACGCGGCTCGGATCCTGTGTTGCTGTGGCTCTGGCTTAGGCTGGTGGCTACAGCTCCGATTCGACCCCTAGCCTGGGAACCTCCATATGCCGCGGGAGTGGCCCAAAAGAAATAGCAAAAAGACAAAAAAAAAAAAAAAGAATC	T	13	XP3,XP7,LW3,LW6,LW7,LA2	-	-	intergenic_variant	MODIFIER	-	-	-	0	2	4	6
sv_00232	1	13604476	13604585	109	DEL	GCCTTCCCAGACTCGTGATCTACTCCAAGAAGTGACATCACTCCAATCCCTGCTTTATTGTCACATTTCCTTCTTTGACTCTGAGTCTTCCTCTTCTGTCATTTAAGGAT	G	15	WXP1,WXP2,WXP4,WXP5,WXP6,WXP7,XP1,XP2,XP3,XP4,XP5,XP6,XP7,LW5	-	-	intergenic_variant	MODIFIER	-	-	-	6	7	1	14
sv_00233	1	13606970	13607051	81	DUP:TANDEM	ACTACGTCACAGGTGTGTGCGTGTGTATACATATTTAGTTTTCTCACATTTTCGACGTCTCTTCGCTTATTCTTACTCTCTG	ACTACGTCACAGGTGTGTGCGTGTGTATACATATTTAGTTTTCTCACATTTTCGACGTCTCTTCGCTTATTCTTACTCTCTGCTACGTCACAGGTGTGTGCGTGTGTATACATATTTAGTTTTCTCACATTTTCGACGTCTCTTCGCTTATTCTTACTCTCTG	6	DU4,DU7	ENSSSCG00000004078	ENSSSCT00000004507.4	downstream_gene_variant	MODIFIER	VIP	protein_coding	DISTANCE=4260,STRAND=-1	0	0	2	2
sv_00234	1	13606970	13606970	81	INS	A	ACTACGTCACAGGTGTGTGCGTGTGTATACATATTTAGTTTTCTCACATTTTCGACGTCTCTTCACTTATTCTTACTCTCTG	7	WXP6,WXP7,XP2,XP3,XP4,XP5,XP6,LW5	ENSSSCG00000004078	ENSSSCT00000004507.4	downstream_gene_variant	MODIFIER	VIP	protein_coding	DISTANCE=4341,STRAND=-1	2	5	1	8
sv_00235	1	13634154	13634675	521	DEL	TGGGAACCATGAGGTTGAGGGTTCAATCCTGGCCTCACTCAGTGGGTTAGGGATCCGGTGTTGCCATGAGCTGTGGTGTAGGTCGAAGACATGGTTGGATCTGGCATTGCTGTGGCTGTGGCTGTGGCATAGGCCGGCAGCAACAGCTGCAATTAGACCCTTAGCCTAATTTCACTGAGCTAAATCCCTATAGGAGAATTGCTACGTCTGTTGTGGTGTAAGCAGTCATGAAGCTGACTTGAGAAATTTGAAAGAGTGAAGAATAAAACCTTTAAATGGACTCTCTTAATTATGTACAAATGAAACAATACTTCCAACACTTAAGCATGAGTTGACTAAAAGGAGACATCCAGCTATTATGTTAGCTGCTCTAGACTTCTCTCCATTGTAAAATCTTAA…	T	5	XP3,XP5,XP6	-	-	intergenic_variant	MODIFIER	-	-	-	0	3	0	3
sv_00236	1	13762698	13762780	82	DEL	AATCTGAATACAGATAGAGATGGAGTTATCTGTATTCAGATGAATTTATCACATCATTATACAACTACAGATGTGATAAATTC	A	7	WXP6,LA4,LA5,LA7,DU5	ENSSSCG00000004081	ENSSSCT00000030512.3	intron_variant,feature_truncation	MODIFIER	-	protein_coding	INTRON=2/34,STRAND=1	1	0	4	5
sv_00237	1	13831681	13831981	300	DEL	GAGAAGGCATTTTATTTTATTTTTTTTTTTTTTGTCTTTTTTTTTGTTGTTGTTGTTGTTGCTATTTCTTGGGCCGCTCCTGCGGCATATGGAGGTTCCCAGGCTAGGGGTCTAATCAGAGCTGTAGCCACTGGCCTCCGCCAGAGCCACAGCAACGCAGGATCCGAGCCGCGTCTGCAACCTACACCACAGCTCACGGCAATGCCGGATCGTTAACCCACTGAGCAAGGCCGGGGATCGAACCCGCAACCTCATGGTTCCTAGTCGGATTTGTTAACCACTGCGCCATGACGGGAACTCC	G	11	WXP6,XP4,XP6	ENSSSCG00000004081	ENSSSCT00000004510.4	intron_variant,feature_truncation	MODIFIER	-	protein_coding	INTRON=4/34,STRAND=1	1	2	0	3
sv_00238	1	13832622	13832922	300	DEL	TAGAAACAACCAGCAGGAGTTCCCGTCGTGGCGCAGTGGTTAACGAATCCGACTAGGAACCATGAGGTTGCGGGTTCGGTCCCTGCCCTTGCTCAGTGGGTTAACGATCCGGCGTTGCCGTGAGCTGTGGTGCAGGTTGCAGACGCGGCTCAGATCCCGAGTTGCTGTGGCTGTGGCGTAGGCCAGTGGCTACAGCTCCGATTCAACCCCTAGCCTGGGAACCTCCATATGCCGCGGGAGCGGCCCAGAAATAGCAACAACAACAACAACAACAGACAAAAAGACAAAAAAAAAAAAAAAA	T	6	XP3,XP4,XP6	ENSSSCG00000004081	ENSSSCT00000004510.4	intron_variant,feature_truncation	MODIFIER	-	protein_coding	INTRON=4/34,STRAND=1	0	3	0	3
sv_00239	1	13845469	13845755	286	DEL	TTAAAAAATAATTTTTTTTTTTTTTTTTGTTGTTGTTGTTGTTGTTGCTATTTCTTGGGCCGCTCCCGCGGCATATGGAGGTTCCCAGGCTAGGGGTTGAATCGGAGCTGTAGCCACCGGCCTACGCCAGAGCCACAGCAACGCGGGATCCGAGCCGCGTCTGCAACCTACACCACAGCTCACGGCAACGCCTGATCCTTAACCCACTGAGCAAGGGCAGGGACCGAACCCGCAACCTCATGGTTCCTAGTTGGATTCGTTAACCACTGCGCCACGACGGAAACTCC	T	6	WXP5,WXP6	ENSSSCG00000004081	ENSSSCT00000004510.4	intron_variant,feature_truncation	MODIFIER	-	protein_coding	INTRON=7/34,STRAND=1	2	0	0	2
sv_00240	1	13863451	13863744	293	DEL	TCACATTGATTTTTATTTATTTATTTATTTTTGTCTTTTTTTTTTTTTTTTTTGCTATTTCTTTGGGCCGCTTCCGCAGCATATGGAGGTTCCCAGGCTAGGGGTCTAATCGGAGCTGTAGCCGCTGGCTTACACCAGAGCCACAGCAACGCGGGATCCGAGCCGCATCTGCGACCTACACCACAGCTCACGGCAACGCCGGATCGTTAACCCACTGAGCAAGGGCAGGGATCGAACCCGCAACCTCATGGTTCCTAGTCGGATTCATTAACCACTGCGCCACGACGGGAACTC	T	33	WXP2,WXP3,WXP4,WXP5,WXP6,WXP7,XP2,XP3,XP4,XP6,LW4,LW5,LW7,DU4,DU7	ENSSSCG00000004081	ENSSSCT00000004510.4	intron_variant,feature_truncation	MODIFIER	-	protein_coding	INTRON=12/34,STRAND=1	6	4	5	15
sv_00241	1	13984837	13985529	692	DEL	CCAGCATTGGCTTGCGTAGCCGGCTACAGCTCGATGGACCTAGCCTGGACCTCCATATGCCGGGAGGCCAAGAATAGCAAAAGACAAAAAAAAAAAAAAAAAAAAAAGAAT	C	17	WXP2,WXP6,WXP7,XP1,XP3,XP5,XP6,XP7,LW1,LW3,LW5,LW6,LW7,LA5,LA7,DU1,DU2,DU4,DU6	ENSSSCG00000049158	ENSSSCT00000073986.1	intron_variant,feature_truncation	MODIFIER	-	protein_coding	INTRON=6/25,STRAND=1	3	5	11	19
sv_00242	1	14053261	14053551	290	DEL	TCCTGAACCTTTGTTTCTTTTTTTTTTTTTTTTTTTTTTTTTGTCTTTTTGCTATTTCTTTGGGCCGCTCCCTCAGCATATGGAGGTTCCCAGGCTAGGGGTCGAATCGGAGCTGTAGCCACTGGCCTACGCCAGAGCCACAGCAACGCGGGATCCGAGCTGTGTCTGAGACCTACACCACAGCTCACGGCAACGCCGGATCCTTAACCCACTGAGCAAGGCCAGGGATGGATCCCGCAGCCTCACGGTTCCTAGTCGGATTCGTTAACCACTGCGCCACGACGGGAACTC	T	4	XP1,XP3,XP6,LW5	ENSSSCG00000004082	ENSSSCT00000082300.1	intron_variant,feature_truncation	MODIFIER	-	protein_coding	INTRON=4/51,STRAND=1	0	3	1	4
sv_00243	1	14055273	14055570	297	DEL	CTTCTTTTTTTTTTTTTTTTTTTTTTTTTTTTGTCTTTTGTTGTTGTTGCTATTTCTTGGGCCGCTCCCGCGGCATATGGAGGTTCCCAGGCTAGGGGTTGAATCGGAGCTGTAGCCACCGGCCTACGCCAGAGGCACAGCAAGGCAGGATCCGAGCCGCGTCTGCAACCTACACCACAGCTCACGGCAACGCCGGATCCTTAACCCACTGAGCAAGGCCAGGGACCGAACCCGCAACCTCATGGTTCCTAGTCGGATTCGTTAACCACTGCGCCACGACAGGAACTCCTTTTCTTCT	C	14	WXP2,WXP3,WXP4,WXP5,WXP6,WXP7,XP1,XP3,XP4,XP5,XP6,XP7,LW5,LW6,DU1,DU2,DU7	ENSSSCG00000004082	ENSSSCT00000082300.1	intron_variant,feature_truncation	MODIFIER	-	protein_coding	INTRON=4/51,STRAND=1	6	6	5	17
sv_00244	1	14077456	14077610	154	DEL	TAAGAAATGGTTACATTGAGAACTATGTCTAGATACTCATGTCGCAACAGAAGGAAGGGTGGGGGAAAAAACTGTAACTGCAATGTATACATCTAAGGATGACCTGACCCCCTTGCTGTACAGTGGGAAAATAATAAAAAAAAAATTAAAAAAAA	T	13	WXP1,WXP2,WXP5,WXP6,WXP7,XP1,XP2,XP3,XP4,XP5,XP6,XP7,LW5,LW6,DU7	ENSSSCG00000031744	ENSSSCT00000050808.1	intron_variant,feature_truncation	MODIFIER	-	protein_coding	INTRON=3/9,STRAND=1	5	7	3	15
sv_00245	1	14206562	14206857	295	DEL	CAAGAAGAAATCCAGGAGTTCCCGTCGTGGCGCAGTGGTTAACGAATCCGACTAGGAACCATGAGGTTGCGGGTTCAGTCCCTGCCCTTGCTCAGTGGGTTAACGATCCGGCGTTGCCATGAGCTGTGGTGTAGGTTGCAGACACGGCTCGGATCCCGCGTTGCTGTGGCTCTGGCGTAGGCCGGCGGCTACAGCTCCAATTCAACCCCTAGCCTGGGAACCTCCATATGCCGCGGGAGCGGCCCAAGAAATAGCAACAACAACAACAAAAGACAAAAGACAAAAAAAAAAAAAAG	C	14	WXP2,WXP3,WXP4,WXP5,WXP6,WXP7,XP1,XP2,XP3,XP4,XP5,XP6,XP7,LW7,DU4	ENSSSCG00000004082	ENSSSCT00000004511.4	downstream_gene_variant	MODIFIER	-	protein_coding	DISTANCE=4859,STRAND=1	6	7	2	15
sv_00246	1	14320214	14320503	289	DEL	TCAAAGGCACACATTCTTTTTTTTTTTTTTTTTTTTTTTTGTCTTTTTGCTATTTCTTTGGGCCACACCCGTGACATATGGAGGTTCCCAGGCTAGGGGTCGAATCGGAGCTGTAGCCACTGGCCTACACCAGAGCCACAGAAACTTGGGATCTGAGCCGCATCTGCAACCTACACCACAGCTCACGGCAACGCCGGATCGTTAACCCACTGAGCAAGGGCAGGGACCGAACCCGCAACCGCATGGTTCCTAGTCGGATTCGTTAACCACTGCGCCACAACGGGAACTCC	T	7	WXP2,WXP3,WXP4,WXP5,WXP7,XP1,XP2,XP3,XP6	ENSSSCG00000025777	ENSSSCT00000004517.5	intron_variant,feature_truncation	MODIFIER	ESR1	protein_coding	INTRON=3/6,STRAND=-1	5	4	0	9
sv_00247	1	14327835	14328037	202	DEL	TAGGATAAGCTCTTGAGAGCTTGTTTGGAGGTTCTAGCAGGGGAGCGCAGCTACTCTGTACCCTTGACCGAAGAACAGTCCTCCTCTACCGGGGATGGTCGTCCTCTTCAACTGAGCGCGCAGCTTCGGGAGGGACACACATGTATACATGTAAGGATAACCTGACCCCCTTGCTGTACAGTGGGGAAAAAAAAAAAAAAAAA	T	19	WXP6,XP1,XP2,XP3,XP6,XP7,LW7,DU7	ENSSSCG00000025777	ENSSSCT00000004517.5	intron_variant,feature_truncation	MODIFIER	ESR1	protein_coding	INTRON=3/6,STRAND=-1	1	5	2	8
sv_00248	1	14627793	14627793	74	INS	G	GGAAACGAACCCGACTAGTATCTATGGGGATGCTGGTTTGATCCCTGGCCTCACGCAGTGAGTCAAGGATCTGGT	6	WXP3,WXP5,LA2,LA6	ENSSSCG00000004087	ENSSSCT00000042096.2	intron_variant,feature_elongation	MODIFIER	CCDC170	protein_coding	INTRON=10/10,STRAND=-1	2	0	2	4
sv_00249	1	14664320	14664658	338	DEL	ATAGGATTCCATTTATTTTTTTTTTTTTTTTTTTTTTTTTGTCTTTTGTTGTTGTTGTTGTTGTTGCTATTTCTTGGCCGCTCCGCGGCATATGGAGTTCCAGGCTAGGGTTGAATCGGAGCTGTAGCCACCGGCCTACGCCAGAGCCACAGCAACGCGGGATCCGAGCCGTGTCTGCAACCTACACCACAGCTCACGCAACGCCGGATCATTAACCACTGAGCAAGGCAGGACCGAACCCGCAACCTCATGGTTCCTAGTCGGATTCGTTAACCACTGGCCACGACGGAACTCCTTTTTTTTTTTTTTTTTTTTTTTTTTTTTTTTTATTTTTTTTTT	A	23	WXP2,WXP4,WXP5,WXP6,WXP7,XP1,XP3,XP4,XP5,XP6,XP7,LW4,LW6,LW7,DU2,DU4,DU5,DU6,DU7	ENSSSCG00000004087	ENSSSCT00000004518.3	intron_variant,feature_truncation	MODIFIER	CCDC170	protein_coding	INTRON=8/9,STRAND=-1	5	6	8	19
sv_00250	1	14683398	14683714	316	DEL	CAAGAAATGTAGGCTGGAGTTCCCGTCGTGGCGCAGTGGTTAACGAATCCGACTAGCAACCATGAGGTTGCGGGTTCGGTCCCTGCCCTTGCTCAGTGGGTTAACGATCCGGCGTTGCCGTGAGCTGTGGTGTAGGTTGCAGACGCGGCTCGGATCCCGCGTTGCTGTGGCTCTGGCGTAGGCCGGTGGCTACAGCTCTGATTCAACCCCTAGCCTGGGAAACTCCATATGCCGCGGGAGCGGCCCAAGAAATAGCAACAACAACAACAACAACAACAACAACAACAAAAAAGACAAAAAGACAAAAAAAAAAAAAA	C	7	WXP3,WXP5,XP1,XP3,XP6,LW4	ENSSSCG00000004087	ENSSSCT00000004518.3	intron_variant,feature_truncation	MODIFIER	CCDC170	protein_coding	INTRON=6/9,STRAND=-1	2	3	1	6
sv_00251	1	14716274	14716576	302	DEL	TAAAACCTAATGAGGGAGTTCCCGTCGTGGCGCAGTGGTTAACGAATCCGACTAGGAACCACGAGGTCGCGGGTTCGGTCCCTGCCCTTGCTCAGTGGGTTAACAATCCGGCGTTGCTGTGAGCTGTGGTGTAGGTTGCAGACGCGGCTCGGATCCCTCGTTGCTGTGGCTCTGGCGTAGGCCGGTGGCTACAGCTCCAATTCAACCCCTAGCCTGGGAACCTCCATATGCCTCGGAAGCGGCCCAAGAGATAGCAACAACAACAACAACAAAAGACAAAAAGACAAAAAAAAAAAAAAAAAA	T	16	WXP6,WXP7,XP2,XP5,LW6,LW7	ENSSSCG00000004087	ENSSSCT00000004518.3	intron_variant,feature_truncation	MODIFIER	CCDC170	protein_coding	INTRON=3/9,STRAND=-1	2	2	2	6
sv_00252	1	14817161	14817460	299	DEL	TAAGAAATGTCATAATCGGAGTTCCCATCGTGGCGCAGTGGTTAACGAATCCGACTAGGAACCATGAGGTTTCGGGTTCGGTCCCTGCCCTTGCTCAGTGGGTTAACCATCCGGCGTTGCCATGAGCTGTGGTGTAGGTTGCAGATGTGGCTCGGATCCTGCGTTGCTGTGGCTCTGGCGTAGGCTGGTGGCTACAGCTCCGATTCAACCCCTAGCCTGGGAACCTCCATATGCCGCGGGAGCGGCCCAAGAAATAGCAACAACAAAAAGACAAAAAAAAAAGACAAAAGACAAAAAAAA	T	9	WXP6,WXP7,XP3,XP4,XP5,XP6,LW6,DU7	ENSSSCG00000004089	ENSSSCT00000004520.4	intron_variant,feature_truncation	MODIFIER	RMND1	protein_coding	INTRON=6/11,STRAND=1	2	4	2	8
sv_00253	1	14852029	14852320	291	DEL	TAGGTCTACACTTTTTTTTTTTTTTTTTTGTCTTTTTTGTTGTTGTTGTTGCTATTTCTTGGGCCGCTCCCGCGGCATATGGAGGTTCCCAGGCTAGGGGTCAAATCGGAGCTGTAGCCACCAGCCTACGCCAGAGCCACAGCAACGCAGGATCCGAGCCGCGTCTGCAACCTACACCACAGCTCACGGCAACGCCGGATCGTTAACCCACTGAGCAAGGGCAGGGACCGAACCCGCAACCTCATGGTTCCTAGTCGGATTCATTAACCACTGCGCCACGACGGGAACTCCA	T	4	LW5,LA6	ENSSSCG00000004089	ENSSSCT00000004520.4	downstream_gene_variant	MODIFIER	RMND1	protein_coding	DISTANCE=800,STRAND=1	0	0	2	2
sv_00254	1	14937929	14938241	312	DEL	CAAAAATGCAAGAGAGGGAGTTCCCATCGTGGCGCAGTGGTTAACGAATCCGACTAGGAACCATGAGGTTGCGGGTTCGGTCCCTGCCCTTGCTCAGTGGGTTAACGATCCGGCGTTGCCGTGAGCTGTGGTGTAGGTTGCAGACGCGGCTCGGATCCCGCGTTGCTGTGGCTCTGGCGTAGGCCGGTGGCTACAGCTCCGATTCAACCCCTAGCCTGGGAACCTCCATATGCCGCGGGAGCGGCCCAAGAAATAGCAACAACAACAACAACAACAACAACAAAAAAAGACAAAAAGACAAAAAAAAAAAAAA	C	9	WXP5,XP2,XP4,XP5,LA7,DU1,DU2,DU3	ENSSSCG00000031733	ENSSSCT00000063559.2	intron_variant,feature_truncation	MODIFIER	AKAP12	protein_coding	INTRON=2/5,STRAND=-1	1	3	4	8
sv_00255	1	14945268	14945529	261	DEL	ACCAATTAATTTTTTATTTTATTTTATTTATTTATTTATTTATTTATTTTTGTCTTTTTGCTATTTCTTGGCGCTCGCGGCATATGGAGGTTCCAGGCTAGGGTCGAATCGGAGCTGTAGCCACCGCCTACGCCAGAGCCCAGCATGCGGATCCGAGCCGTCTGCAACCTACACCGCAGCTCACGGTACTGACAAGGACCGACTCGCAACCTCATGTTCCTAGTCGGATTCGTTAACCACTGTGCCACGACGGGAACTCCCG	A	14	WXP6,WXP7,XP2,LW4,LW5,LA7,DU2,DU3,DU4,DU5,DU6,DU7	ENSSSCG00000031733	ENSSSCT00000063559.2	intron_variant,feature_truncation	MODIFIER	AKAP12	protein_coding	INTRON=2/5,STRAND=-1	2	1	9	12
sv_00256	1	15018766	15018820	54	DEL	ATCAGACTAGTATCCATGAGGATGCGGGTTTGATCCCTGGCCTCACTCAGTGGGG	A	17	WXP4,WXP7,XP2,XP4,LW6,LW7	ENSSSCG00000031733	ENSSSCT00000063559.2	upstream_gene_variant	MODIFIER	AKAP12	protein_coding	DISTANCE=1765,STRAND=-1	2	2	2	6
sv_00257	1	15162610	15162896	286	DEL	TAATTTCAGATATTCTTTTTTTTTTTTTTTTTTTTCTTTTTTTTTTTGTTGTTGTTGTTGTTGCTATTTATTGGGCCGCTCCCGCGCATATGGAGTTCCCAGCTAGGGTCCAATCGAGCTGTAGCCACCGCCTACGCCAGAGCACAGCAACGCAGATCCGAGCCGCGTCTGCAACCTACACCACAGCTCACCAACGCCGATCCTAACCCACTGACAGGCAGGACCGAACCCGCAACCTCATGGTTCCTAGTCGGATTCGTTAACCACTGCGCCACGACTGGAACTCC	T	17	WXP4,WXP5,WXP6,WXP7,XP1,XP2,XP3,XP4,XP5,XP6,XP7,LW1,LW2,LW3,LW6,LW7,LA1,LA2,LA6,LA7,DU4,DU5,DU6,DU7	ENSSSCG00000004092	ENSSSCT00000004523.4	intron_variant,feature_truncation	MODIFIER	MTHFD1L	protein_coding	INTRON=27/28,STRAND=-1	4	7	13	24
sv_00258	1	15168472	15168558	86	DEL	TGCAGATGTCAGCTGAAAAGACATAAACCGGTGATGGTGTTTGTATCTATGTGACTGACTGGTTCAACAGTACCCACATTTTCCAAA	T	16	WXP2,WXP4,WXP6,WXP7,XP4,XP5,XP7,LW6,LW7,LA4,LA7,DU7	ENSSSCG00000004092	ENSSSCT00000004523.4	intron_variant,feature_truncation	MODIFIER	MTHFD1L	protein_coding	INTRON=27/28,STRAND=-1	4	3	5	12
sv_00259	1	15179085	15180278	1193	DEL	AACCCTGACCCTCTCAGAGTGTCTAGCTGCACTAGATACATATCTTTCTTGGCCCTTTGTGACGCTATGTATATTTCATTAAAACGTCAATGTGGTACATCAGCTTAACCTCTTCCCGGGGACGGAAATGAAGCAAGAAAAGAAGAAATTAAAACTGTCAATCTAAAAGCCACGGGCTGTCCCTGAATGAAAATAAGGATTTTGCCTGCCACTTTGCTCAAAGGTTAAGACTATTGCATGCGGTGTTTAAATTGAGAAACCTAAGGTAGGAATACATTTGTGTGTGTGTGAAAGTCTAGATCTCTTTGGTCTTGAAGCATTCCGGATGGCATATTTATTGATTTATTTACTTATTCACTACTTATTTTTTCTTCCACACCTGTGGCATGTGGAAGTTCC…	A	6	XP1,XP2,XP3,XP6	ENSSSCG00000004092	ENSSSCT00000004523.4	intron_variant,feature_truncation	MODIFIER	MTHFD1L	protein_coding	INTRON=27/28,STRAND=-1	0	4	0	4
sv_00260	1	15180457	15180586	129	DEL	GAAAACAACTCTGGGCCTCCTTCAAACACATTAACTGATGGGTGACAGAGACAGCAAGATCCAGACCCCAAAAAAGGTGGCTAATGTTATTTTGAGTTAGAAAATACCAAAGCAAGAGTTTCAACACCCC	G	11	XP4,DU4,DU7	ENSSSCG00000004092	ENSSSCT00000004523.4	intron_variant,feature_truncation	MODIFIER	MTHFD1L	protein_coding	INTRON=27/28,STRAND=-1	0	1	2	3
sv_00261	1	15216634	15216934	300	DEL	ACTCTTTCCCCATTTTTTTTTTTTTTTTTGTCTTTTGTCTTTTTGTTGTTGTTGTTGTTGCTATTTCTTGGGCCGCTCCCGCGGCATATGGAGGTTCCCAGGCTAGGGGTCGAATTGGAGCTGTAGCCACCGGCCTACGCCAGAGCCACAGCAACGCGGGATCCGAGCCGCGTCTGCAACCTACACCACAGCTCACGGCAACGCCGGATCGTTAACCCACTGAGCAAGGGCAGGGACCGAACCCGCAACCTCATGGTTCCTAGTCGGATTCGTTAACCACTGCGCCACGACGGGAACTCCC	A	14	WXP3,WXP5,WXP6,WXP7,XP1,XP2,XP3,XP4,XP5,XP6,XP7,LW4,LW5,LA5,LA6,LA7,DU2,DU6,DU7	ENSSSCG00000004092	ENSSSCT00000004523.4	intron_variant,feature_truncation	MODIFIER	MTHFD1L	protein_coding	INTRON=22/28,STRAND=-1	4	7	8	19
sv_00262	1	15219616	15219897	281	DEL	TAATGAGAGAAGTGTTTTTTTTTTTTGGTCTTTTTGCTATTTCTTGGTCTTGGGCCGCTCCTGCAGCATATGGAGATTCCTAGGCTAGGGGTCCAGTCAGAGCTGTAGCCACTGGCCTACACCAGAGCCACAGCAACGCGGGATCCGAGCCGCGTCTGCAACCTACACCACAGCTCACGGCAACGCCGGATCGTTAACCCACTGAGCAAGGGCAGGGATCGAACCCGCAACCTCATGGTTCCTAGTCGGATTCGTTAACCACTGCGCCACGACGGGAACTCC	T	15	WXP3,WXP4,WXP6,XP4,XP5,XP6,LW5,LA6,DU6	ENSSSCG00000004092	ENSSSCT00000004523.4	intron_variant,feature_truncation	MODIFIER	MTHFD1L	protein_coding	INTRON=22/28,STRAND=-1	3	3	3	9
sv_00263	1	15421183	15421504	321	DEL	AACCATAAGTTCTTTTTTTTTTTTTTTTTTTTTTTTTTTTTTGTCTTTTGTCTTTTTGTTGTTGTTGTTGTTGTTATTGTTGCTATTTCTTGGGCCGCTCCCGCGGCATATGGAGGTTCCCAGGCTAGGGGTCCAATCGGAGCTGTAGCCACCGGCCTACACCAGAGCCACAGCAACGCGGGATCCGAGCCGCGTCTGCAACCTACACCACAGTTCACGGCAACGCCAGATCGTTAACCCACTGAGCAAGGGCAGGGATCGAACCCGCAACCTCATGGTTCCTAGTCGGATTCGTTAACCACTGCGCCACGACGGGAACTCC	A	10	WXP6,XP3,LW4,LW5,LW7,LA6,LA7,DU1,DU6,DU7	ENSSSCG00000032778	ENSSSCT00000038405.2	intron_variant,feature_truncation	MODIFIER	PLEKHG1	protein_coding	INTRON=4/17,STRAND=-1	1	1	8	10
sv_00264	1	15467955	15468065	110	DEL	CTCTACACTGTCACTAGTAGTATCTAGAGACCAATGCTCAGACACTCTAATTTTTTTTTTTTTTTTTTTTTGTCTTTCTAGGTCACACCGTGTATGGAATTCCTAGCTAGG	C	9	WXP3,WXP5,XP2,XP3	ENSSSCG00000032778	ENSSSCT00000038405.2	intron_variant,feature_truncation	MODIFIER	PLEKHG1	protein_coding	INTRON=3/17,STRAND=-1	2	2	0	4
sv_00265	1	15601421	15601570	149	DEL	TAAAGAAATGGACTCATGTTGCAACAGAAGAAAGGGTGGGGGAAAAAATGTAATTGTAATGTATACATGTAAGGATAACCTGACCCCCTTGCTGTATAGTGGGAAAAAAAAATAAAAAATAAAAAATAAATAAAAAAAGAAAAGAAAAAA	T	5	XP3,DU5,DU6,DU7	-	-	intergenic_variant	MODIFIER	-	-	-	0	1	3	4
sv_00266	1	15649605	15649661	56	DUP:TANDEM	TTAGCTTGGACCCTGTCATCCTCTGGTCAAAGGAATTAACCCTCCTTTGACCATAGA	TTAGCTTGGACCCTGTCATCCTCTGGTCAAAGGAATTAACCCTCCTTTGACCATAGACAGGACAGGATCTACGTCAATAAGATCTAAGTTAGCAAGTAAGTTTGTAGCTTGGACCCTGTCATCCTCTGGTCAAAGGAATTAACCCTCCTTTGACCATAGA	7	LW6,LW7,LA6,DU3,DU4	-	-	intergenic_variant	MODIFIER	-	-	-	0	0	5	5
sv_00267	1	15715674	15715963	289	DEL	GCGTTTACAAATCTTTTTTTGTTTGTTTGTTTGTTTGTTTGTCTTTTTGCTGTTTCTTTGGGCCGCTCCTGCAGCATATGGAGGTTCCCAGGCTAGGGGTCTATTCGGAGCTGTAGCCACTGGCCTACGCCAGAGCCACAGCAACGCGGGATCCGAGCCGCGTCTGCAACCTACACCACAGCTCACGGCAACGCTGGATCGTTAACCCACGGAGCAAGGGCAGGGACCGAACCCTCAACCTCATGGTTCCTAGTCGGATTCGTTAACCACTGCGCCACGATGGGAACTCC	G	15	XP3,XP6,LW1,LW2,LW6,LW7,LA3,LA4,LA6,LA7,DU1,DU2,DU3,DU4,DU6	ENSSSCG00000046985	ENSSSCT00000079953.1	non_coding_transcript_exon_variant,intron_variant,feature_truncation	MODIFIER	-	lncRNA	EXON=2/2,INTRON=1/1,STRAND=-1	0	2	13	15
sv_00268	1	15720873	15720975	102	DUP:TANDEM	TAAGGCACATTCTGAGGTCCCGGGCTGCCAGTGTTGAGATGCCAACATATCTGCTTTGTGGGGAAACCCTTTAACACATGCTCACCCCTAAACCAAATGCTGG	TAAGGCACATTCTGAGGTCCCGGGCTGCCAGTGTTGAGATGCCAACATATCTGCTTTGTGGGGAAACCCTTTAACACATGCTCACCCCTAAACCAAATGCTGGAAGGCACATTCTGAGGTCCCGGGCTGCCAGTGTTGAGATGCCAACATATCTGCTTTGTGGGGAAACCCTTTAACACATGCTCACCCCTAAACCAAATGCTGG	6	XP3,XP6	ENSSSCG00000046985	ENSSSCT00000079953.1	non_coding_transcript_exon_variant	MODIFIER	-	lncRNA	EXON=1/2,STRAND=-1	0	2	0	2
sv_00269	1	15787232	15787522	290	DEL	TAAGAATGAAATATGGAGGAGTTCCCGTCGTGGCGCAGAGGTTAACGAATCCGACTAGGAACCATGAGGTTGAGGGTTCGGTGCCTGCCCTTGCTCAGTGGGTTAACGATCCGGCGTTGCCGTGAGCTGTGGTGTAGGTTGCAGACGCGGCTCGGATCCCGCGTTGCTGTGGCTCTGGCGTAGGCCGGTGGCTACAGCTCCGATTGGACCCCTAGCCTGGGAACCTCCATATGCCGCGGGAGCGGCCCAAAGAAATAGCAAAAAAAAAAAGCCAAAAAGCCAAAAAAAAAA	T	17	WXP2,WXP3,WXP5,WXP6,WXP7,XP2,XP3,XP5,XP6,XP7,LW1,LW2,LW4,LW5,LW6,LW7,LA1,LA2,LA3,LA4,LA5,LA6,LA7,DU1,DU2,DU3,DU4,DU7	-	-	intergenic_variant	MODIFIER	-	-	-	5	5	18	28
sv_00270	1	15796139	15796435	296	DEL	TTAAAAAGGGATGAGGGAGTTCCCGTCGTGGCGCAGTGGTTAACGAATCCAACTAGGAACCATGAGGTTGCGGGTTCGGTCCCTGCCCTTGCTCAGTGGGTTAACGATCCGGCGTTGCCGTGAGCTGTGGTGTAGGCTGCAGACGCGGCTCAGATCCTGCGTTGCTGTGGATCTGGCGTAGGCCGGTGGCTACAGCTCCGATTCGACCCCTAGCATGGGAACCTCCATATGCCACGGGAGCAGCCCAAGAAATAGCAAAAAAGACAAAAAAATAAATAAATAAA	T	19	WXP1,WXP2,WXP5,WXP6,XP1,XP3,XP6,LW1,LW3,LW4,LW5,LW7,LA1,LA4,LA5,LA6,LA7,DU1,DU2,DU3,DU4,DU5	-	-	intergenic_variant	MODIFIER	-	-	-	4	3	15	22
sv_00271	1	15817697	15817976	279	DEL	ATCTCTCTTTTTTTTTTTTTTTTTTGTCTTTTTGCTATTTCTTTGGGCCGCTCCCGCGGCATACGGAGGTTCCCAGGCTAGGGGTCGAATTGGAGCCGTAGCCACCGGCCTATGCCAGAGCCACAGCAACGCGGGATCCGAGCCGCATCTGCAACCTACACCACAGCTCACGGCAACGCCGGATCATTAACCCACTGAGCAAGGGCAGGGACCAAACCCGCAACCTCATAGTTCCTAGTTGGATTCGTTAACCACTGCGCCACGACGGGAACTCCCTGGG	A	9	WXP7,XP1	-	-	intergenic_variant	MODIFIER	-	-	-	1	1	0	2
sv_00272	1	15887319	15887609	290	DEL	GGCATCAGACTTCTTTTTTTTTTTTTTTTTTTTTTTTTTTTGTCTTTTTGCTATTTCTTGGGCCGCTCCCACGGCATATGGAGGTTCCCAGGCTAGGGGTCCAATCGGAGCTGTAGCCACCAGCCTACACCAGAGCCACAGCAACGCAGGATCCGAGCCGCGTCTGCAACCTACACCACAGCTCACGGCAACGCCGGATCGTTAACCCACTGAGCAAGGGCAGGGACCGAACCTGCAACCTCATGGTTCCTAGTCGGATTCGTTAACCACTGCGCCACGACGGGAACTCCA	G	10	LA6,LA7	ENSSSCG00000004094	ENSSSCT00000004526.4	intron_variant,feature_truncation	MODIFIER	PPP1R14C	protein_coding	INTRON=2/2,STRAND=-1	0	0	2	2
sv_00273	1	15957500	15964597	7097	INV	GGTGTCCCCAGAGGGCTTGACATTCCTGGTGCCAATTATCCAGAAAACTGGAAGGTCCTTCTAGAAGCCAAACTCCTTAGGCGCTGCACAGGGAGGTGGGAGAAGTGACTTTTCATGGGCTTTGTGATTAGACCTTGAGGAGATATCTAGGCCAAACTATGCCCGTAGGTGTCCTCCACGGGGAGGTGGGCCCACGACCAGGTCGGCAGGTCCTGAGCTAGTCTTCCTGGAGCAGCTGACCCAGGTTTATCAGAGTTTGGGTCTTATAATAGCAAAAGCTCCCCATCACTGGCACCTATTATGTGTCTGACACTTTATTATACATGCTACCTCATTAAGTTTTCCTGCCCTTCTGCACAGCAATCTACCTTCAAGGTTGATGATTATGCGCATCTGAAA…	GGGAGTTCCCGTCGTGGCGCAGTGGTTAACGAATCCGACTAGGAACCATGAGGTTGCGGGTTCGGTCCCTGCCCTTGCTCAGTGGGTTAACGATCCGGTGTTGCCGTGAGCTGTGGTGTAGGTTGCAGATGCGGCTCAGATCCCGCGTTGCTGTGGCTCAGGCGTAGGCCGGTGGCTACAGCTCCGATTCGACCCCTAGCCTGGGGACCTCCATATGCCACGGAAGCGGCCCAAGAAATAGCAACAACAACAACAACAACAACAAAAGACAAAAAGACAAAAAAAAAAAAAAAAGTATTCTTCATTTTTTACTATCTGGATCTCATTTTTAAAAATTTAAAAATTTGTTTTATTTAAGTATAGTACATTTACAATGTTGTATTAATTTCTGCTGTATAA…	5	XP3,XP6	-	-	intergenic_variant	MODIFIER	-	-	-	0	2	0	2
sv_00274	1	15965188	15965697	509	DEL	TATCCTTAACCCACTGAGCAAGACCAGGGATCAAACCCACAACCTCATGGTTCCAAGCGGATTCGTTAACCTCTGAGCCACAGCAGGAACCCAACCAACTCTATTTCTAAATAAGGTCACATTCTGACATACTGGGGGTCAGGACTTCAACATATGTTTTGGAAAGAACACAATTCAACCCATACCAATCCAGTCTTGAATTACCATAAGGACCACTATGAACTAGAATATTTAGCAAACCACACTAACATAATACACTTGCAGAAATATTCCATTTGGAGGGTTTAAGTTCTGAAAGCATTTGCTTCAGTTAATGCTGCAGGAGCCTGATATTTCTTTTATGTTTTATTTTTATTCTTTTACTTTTTGGGGCCACACCTGTGGCAAATGGAGGTTCCC…	T	6	WXP4,WXP7	-	-	intergenic_variant	MODIFIER	-	-	-	2	0	0	2
sv_00275	1	15976219	15976480	261	DEL	ATAGGTGACTTCCTTTTTTTTTTTTTTTTTTTTTTTTTTTTTTTTTTTGTATTTTGGCGTCCCGGCATATGTTGGTTCCAGCTAGGGTCCATCGAGCTGTAGCACTGGCCTACGCAGAGCACAGCAACTCGGGATCCGAGCCGTGTCTGCAACCTACACCACAGCTCACGCACGCCGGATCGTTACCCTGAGCAAGGCAGGACGAACCCGCAACTCATGTTCCTAGTCGATTCGTTAACCACTGCGCCACGACGGGAACTC	A	20	WXP1,WXP5,WXP6,XP1,XP2,XP3,XP4,XP6,LW4,LW5,LW6,LW7,LA6,LA7,DU2,DU3,DU7	-	-	intergenic_variant	MODIFIER	-	-	-	3	5	9	17
sv_00276	1	16133136	16133315	179	DEL	TCTTTTTTTTTTTTTTTTTTTTTTTTTGTCTTTTGTCTTTTGTTGTTGTTGTTGCTATTTCTTGGGCCGCTCCCGCGGCATATGGAGGTTCCCAGGTTAGGGGTTGAATCGGAGCTGTAGCCACCAGCCTAGCCAGAGCCACAGCAACGCGGGATCCGAGCCGCGTCTGCAACCTACACG	T	12	WXP6,XP1,XP4,XP7,LW4,LW7,DU2,DU3,DU7	-	-	intergenic_variant	MODIFIER	-	-	-	1	3	5	9
sv_00277	1	16153391	16153472	81	DEL	TTCTCTTTCTTTTTTTTTTTTTTTTTGTCTTTTGTCTTTTTGTCTGTTGTTGTTGTTGTTGCTGTTGTTGCTATTTCTTGTC	T	9	LW7,LA6,LA7,DU1,DU2,DU3	ENSSSCG00000004101	ENSSSCT00000004536.4	intron_variant,feature_truncation	MODIFIER	LRP11	protein_coding	INTRON=2/7,STRAND=1	0	0	6	6
sv_00278	1	16160392	16160708	316	DEL	GAAAGCAGTGGGGTTTTTTTTGGTTTTTGTTTTTTTGTTTTGTTTTGTTTTGTTTTGTTTTGTTTTTTTGTCTTTTTGCTATTTCTTGGGCCGCTCCCGAGGTATATGGAGATTCCCAGGCTAGGGGTCTATTCGGAGCTGTAGCCGCCAGCCTACGCCAGAGCCACAGCAATGCAGGATCCGAGCCGCGTCTGCAACCTACACCACAGCTCACGGCAACGCTGGATCCTTAACCCACTGAGCAAGGGCAGGGATCCAATCCGCAACCTCATGGTTCCTAGTCGGATTTGTCAACCACTGCGCCACGACGGGAACTC	G	5	WXP5,WXP7,XP3,XP4	ENSSSCG00000004101	ENSSSCT00000004536.4	intron_variant,feature_truncation	MODIFIER	LRP11	protein_coding	INTRON=2/7,STRAND=1	2	2	0	4
sv_00279	1	16183968	16184084	116	DEL	CAAAAAGATACATGTTTTGTTTTGTTTTTTTTTTTTGTTTTTGTTTTTGTTTTTTAAACTAAAGCTATATAAAGCTTGTGGATTAAACAGAATAAATTTCTAAATTTAAAAAAAAAA	C	10	WXP3,WXP4,WXP5,WXP6,XP1,XP2,XP3,XP4,XP6,XP7,LW6,LW7,LA4,LA5,LA6,DU7	ENSSSCG00000004101	ENSSSCT00000004536.4	intron_variant,feature_truncation	MODIFIER	LRP11	protein_coding	INTRON=5/7,STRAND=1	4	6	6	16
sv_00280	1	16337084	16348794	11710	DEL	GTTGAATGTGAATTTAGCCATTTATCTTCTGGAGCAATATTTTTCAAACTGTGGGATGTAATCCATTAGTGAATTATGAAATTAGTGAATTCTGATCAGCATTTTATTTATTTATTTATTTTAAGTTTTGTTTTGTTTTGTTTTGTTTTTGTCTTTTCTAGGGCCACATCCGTGGCATATGGAGGTTTCCAGCCTAGGGGTCTAATCAGAGCTGTAGCCACTGGCCTGCCTCAGAGCCACAGCAACGCCAGATCCGAGCCTCATCTGTGACCTACACCACAGTTCACAGCAACACTGGATCCTTAACCCACTGAGCAGGGCCCAGGATCAAACCCGAGTCCTCATGGATGCTAGTTGGGTTCATTACCACTGAGCCAAATTGGAACTTTATGTTCACTT…	G	8	WXP7,XP3,XP6,LW4	ENSSSCG00000004104	ENSSSCT00000004539.4	coding_sequence_variant,intron_variant,feature_truncation	MODIFIER	KATNA1	protein_coding	EXON=4/8,INTRON=4/7,STRAND=1	1	2	1	4
sv_00281	1	16352921	16353195	274	DEL	GCCGCAGTCAGTTCTTTTTTTGTCTTTTTTTTTTTGCTATTTCTTGGGCCGCTCCTGCGGCATATGGAGATTCCTAGGCTAGGGGTCCAGTCGGAGCTGTAGCCACTGGCCTACACCAGAGCCACAACAACGCGGGATCCGAGCCACGTCTGCAACCTACACCACAGCTCACGGCAACGCCGGATCCTCAACCCACTGAGCAAGGGCAGGGACCGAACCCGCAACCTCATGGTTCCTAGTCGGATTCGTTAACCACTGCGCCACGACGGGAACTC	G	12	WXP3,WXP5,WXP7,XP1,XP2,XP3,XP4,XP5,XP6,LW5,LW6,LW7,LA5,LA6,LA7,DU1,DU2,DU7	ENSSSCG00000004104	ENSSSCT00000004539.4	intron_variant,feature_truncation	MODIFIER	KATNA1	protein_coding	INTRON=4/7,STRAND=1	3	6	9	18
sv_00282	1	16370164	16370475	311	DEL	TAAAAAATCAAGACTTAGGAGTTCCCTTCGTGGCGCAGTGGTTAACGAATCCGACTAGGAACCATGAGGTTGCGGGTTCGGTCCCTGCCCTTGCTCAGTGGGTTAACGATCTGGCGTTGCCGTGAGCTGTGGTGTAGGTTGCAGACGCGGCTCGGATCCCGAGTTGCTGTGGCTCTGGCGTAGGCCGGTGGCTACAGCTCCGATTCAACCCCTAGCCTGGGAACCTCCATATGCCGAGGGAGCGGCCCAAGAAATAGCAACAACAGCAACAACAACAACAACAGACAAAAAGACAAAAGACAAAAAAAAAAA	T	11	WXP1,WXP3,WXP5,XP7,LW5,LW6,LW7,LA5,LA6,LA7,DU3,DU4	ENSSSCG00000030067	ENSSSCT00000031837.3	intron_variant,feature_truncation	MODIFIER	GINM1	protein_coding	INTRON=4/7,STRAND=-1	3	1	8	12
sv_00283	1	16373503	16373576	73	DEL	TCCAGAGGTTTTGCCTCCTGCTTGTAAAGCTCCATTTACTACCTATAGGCACATCTCACATTGTTATCAACCTC	T	5	WXP7,XP1,XP2,XP3,XP5	ENSSSCG00000030067	ENSSSCT00000031837.3	intron_variant,feature_truncation	MODIFIER	GINM1	protein_coding	INTRON=3/7,STRAND=-1	1	4	0	5
sv_00284	1	16377960	16378266	306	DEL	ATGGACTGTCGTTTTTTTTTTTTTTTTTTTTTTTTTTTTTTTGTCTTTTGTCTTTTTGTTGTTGTTGCTATTTCTTGGGCCGCTCCCTCGGCATATGGAGGTTCCCAAGCTAGGGGTTGAATCGGAGCTGTAGCCACCGGCCTACGTCAGGGCCACAGCAACGCGGGATACGAGCCGCGTCTGCAACCTACACCACAGCTCACGGCAACGCCGGATCATTAACCCACTGAGCAAGGGCAGGGACCGAACCCGCAACCTCATGGTTCCTAGTCGGATTCGTTAACCACTGCGCCACGATGGGAACTCC	A	8	WXP7,XP1,XP2,XP3,XP6	ENSSSCG00000030067	ENSSSCT00000031837.3	intron_variant,feature_truncation	MODIFIER	GINM1	protein_coding	INTRON=1/7,STRAND=-1	1	4	0	5
sv_00285	1	16390394	16390663	269	DEL	TTTTTTTTTTTTTTTTTTTTTTTTTTTGCTATTTCTTTAGGCCGCTCCCGGTTCCCAGGCTAGGGGTCGAATCCGAGCTGTAGCCGCCAGCCTACGCCAGAGCCACAGCAACATAGGATCCGAGCTGCGTCTGCAATCTACACCACAGCTCACGGCAACGCTGGATCGTTAACCCACTGAGCAAGGGCAGGGACCGAACCCGCAACCTCATGGTTCCTAGTCGGATTCGTTAACCACTGCGCCACGACGGGAACTCGGAGGATTTTTTTA	T	12	WXP5,WXP7,XP3,XP6,XP7,LA4,LA5,LA6,DU2	-	-	intergenic_variant	MODIFIER	-	-	-	2	3	4	9
sv_00286	1	16398766	16399111	345	DEL	CCTGCATCCTCCCAGAGACTACATCAGATCCTTAACCCACTGAGCCACAATGGGAATGCCTTTTATGTAAAATCCCATCCACTGCTGGACGAAACAGTACCCCAAAGCTTTTGGATCACCTGTGTTACTAGCCTTCTATGGTCGAGGAAATGGTTCTCTCTTGATGCTTCTTCTCATATCTAGAGTCATACTATTATAATAATTGATTTTATAGAACTGTATATTATCAATCATTTCAAGTCACCTAGTCATCATTTTATTTTTATTTTTATTTTTGGTCTTTTTTCCATTTCTTGGGCCGCTCCTGCGGCATATGGAGGTTCCCAGGCTAGGGGTCGAATCGGAG	C	8	WXP4,WXP5,XP7	ENSSSCG00000028867	ENSSSCT00000024741.3	upstream_gene_variant	MODIFIER	PPIL4	protein_coding	DISTANCE=1874,STRAND=1	2	1	0	3
sv_00287	1	16412376	16412651	275	DEL	TCAGAGGCTTTTTTTTTTTTTTTTTTTGTCTTTTTGCTATTTCTTTGGGCCGCTCCCGCGGCATATGGAGGTTCCCAGGCTAGGGGTCGAATCAGAGCTGTAGCCACTGGCCTACGCCAGAGCCACAGCAACGCTGGATCCGAGCCATGTCTGCAACCTACACCACAGCTCACGGCAACGCCAGATCGTTAACCCACTGAGCAAGGGCAGGGACTGAACCCGCAACCTCATGGTTCCTAGTCGGATTCGTTAACCATTGCGCCACGACGGGAACTC	T	8	WXP7,XP2,XP3,XP4,XP5,XP7	ENSSSCG00000028867	ENSSSCT00000024741.3	intron_variant,feature_truncation	MODIFIER	PPIL4	protein_coding	INTRON=7/12,STRAND=1	1	5	0	6
sv_00288	1	16413301	16413599	298	DEL	CAAGAATGGTATTCAGGAGTTCCCGTCGTGGCGCAGTGGTTAACGAATCCGACTAGGAACCATGAGGTTGCGGGTTCGGTCCCTGCTCTTGCTCAGTGGGTTAACGATCCGGCGTTGCCGTGAGCTGTGGTGTAGGTTGCAGACGCGGCTCGGATCCCGCGTTGCTGTGGCTCTGGCGTAGGCTGGTGGCTACAGCTCCGATTCAACCCCTAGCCTGGGAACCTCCATATGCCGCGGGAGCGGCCCAAGAAACAACAACAACAACAACAAAAAAGACAAAAAAAAAAAAAAAAAAAAAA	C	16	WXP3,WXP4,WXP5,WXP6,XP1,XP2,XP3,XP6,XP7,LW4,LW6,LW7,LA4,LA5,LA6,LA7,DU1,DU2,DU3,DU7	ENSSSCG00000028867	ENSSSCT00000024741.3	intron_variant,feature_truncation	MODIFIER	PPIL4	protein_coding	INTRON=7/12,STRAND=1	4	5	11	20
sv_00289	1	16437265	16437265	60	INS	C	CGCGGCTCGGGTCCTGCGTTGCTGTGCCTCTGGCGTAGGCCGGTGGCTACAGCTCCGATTT	8	WXP2,XP2,XP3,XP5,XP6	ENSSSCG00000028867	ENSSSCT00000024741.3	intron_variant,feature_elongation	MODIFIER	PPIL4	protein_coding	INTRON=12/12,STRAND=1	1	4	0	5
sv_00290	1	16521599	16521894	295	DEL	TAAGAGGGCATCTAGGAGTTCCTGTCGTGGCGCAGTGGTTAACGAATCCGACTAGGAACCATGAGGTTGCGGGTTCGGTCCCTGCCCTTGCTCAGTGGGTTAACGATCCGGCGTTGCCGTGAGCTGTGGTGTAGGTTGCAGACGCGGCTCGGATCCCACGTTGCTGTGGCTCTGGCATAGGCCGGTGGCTACAGCTCCGATTTGACCCCTAGCCTGGGAACCTCCATATGCCGCGGGAGCGGCCCAAGAAATAGCAACAACAACAACAACAAAAAAAAGACCAAAAAAAAAAAAAA	T	15	WXP2,XP3,XP5	-	-	intergenic_variant	MODIFIER	-	-	-	1	2	0	3
sv_00291	1	16522517	16522792	275	DEL	CAAGAACACGTTCAGGAGTTCCCGTCGTGGCGCAGTGGTTAACGAGTCCGACTAGGAACCATGAGGTTGCGGGTTCGGTCCCTGCCCTTGCTCAGTGGGTTAACTATCTGGCGTTGCCGTGAGCTGTGGTGTAGGTTGCAGACGCGGCTCGGATCCAGCGTTGCTGTGGCTCTGGCGTAGGCCGGTGGCTACAGCTCTGATTAGACCCCTAGCCTGGGAACCTCCATATGCCGCAGGAGCGGCCCAAGAAATAGCAAAAAAAAAAAAAAAAAAAAA	C	8	WXP5,XP1,XP5,XP6,XP7,LW4,LW7	-	-	intergenic_variant	MODIFIER	-	-	-	1	4	2	7
sv_00292	1	16623661	16623731	70	DEL	ACACCTGTGGCAGTGGAAAGGAAGAGTCAAGAGCAAGAGAAATTTCAATGGTAGATTTAAAAAAAAAAAAT	A	10	LW7,LA7	-	-	intergenic_variant	MODIFIER	-	-	-	0	0	2	2
sv_00293	1	16651817	16652121	304	DEL	TTGTAGTAAGTTTTATTTTTTTTATTTTTTTGTCTTTTGTCTCTCTTTTTTGTTGTTGTTGCTGCTATTTCTTGGGCCGCTCCCGCGGCATATGGAGGTTCCCAGGCTAGGGGCTGAATCGGAGCTGTAGCCACCGGACTACACCAGAGCCACAGCAACGCGGGATCCGAGCCGCGTCTGCAACCTACACCACAGCTCACGCAACGCCGGATCGTTAACCCACTGAGCAAGGGCAGGGACCGAACCTTCAATGTCATGGTTCCTAGTCGGATTCGTCAACCACTGCGCCACGACGGGAACTCCCC	T	9	WXP2,WXP5,WXP6,WXP7,XP1,XP2,XP3,XP4,XP5,XP6,XP7,LW5,LW6,DU7	-	-	intergenic_variant	MODIFIER	-	-	-	4	7	3	14
sv_00294	1	16672444	16672777	333	DEL	AAGTACCTTATTTTTTTATTTTTTAAAATTTTTTATTTTTTATTATTATTATTATTTTTTGTCTTTTTGCTATTTCTTTGGGCCGCTCCCACGGCATATGGAGGTTCCCAGGCTAGGGGTTGAATCGGAGCTGTAGCCACTGGCCTACACCACAGCCACAGCAATGCGGGATCCGACAGCCACAGCAATGCGGGATCCGAGCCGCGTCTGCAATCTACACCACAGCTCATGGCAACGCCGGATCATTAACCCACTGAGCAAGGGCAGGGACCAAACCCGCAACCTCATGGTTCCTAGTCGGATTCGTTAACCACTGCGCCACGACGGGAACTCC	A	16	WXP4,WXP6,WXP7,XP1,XP2,XP3,XP4,XP5,XP6,XP7,LW4,LW7,LA7	-	-	intergenic_variant	MODIFIER	-	-	-	3	7	3	13
sv_00295	1	16673396	16673696	300	DEL	CAAAGAAGTAAGGAAGATGGGAGTTCCCGTCGTGGCGCAGTGGTTAACGAATCCGACTAGGAACCATGAGGTTGCGGGTTCCATCCCTGGCCTCGCTCAGTGGGTTAAGGATCTGGCGTTGCCATGAGCTGTGGTGTAGGTTGCAGACGCGGCTCGGATCCCGCGTTGCTGTGGCTCTGGCGTAGGCCGGTGGCTACAGCTCCAATTAGACCCCTAGCCTGGGAACCTCCATATGCCGCGGAAGCGGCCCAAGAAATAGCAACAACAACAACAAAAAAGACAAAAAGACAAAAAAAAAAAA	C	18	WXP2,WXP3,WXP4,WXP5,WXP6,WXP7,XP1,XP2,XP4,XP5,XP6,XP7,LW5,LW7,LA7,DU7	-	-	intergenic_variant	MODIFIER	-	-	-	6	6	4	16
sv_00296	1	16806359	16806660	301	DEL	CAAAAGATTACTTTGTGGAGTTCCCGTCGTGGCGCAGTGGTTAACGAATTGGACTAGGAACCATGAGGTTGCGGGTTCGGTCCCTGCCCTTGCTCAGTGGGTTAACGATCCGGCGTTGCCCTGAGCTGTGGTGTAGGTTGCAGACGCGGCTCGGATCCCGCGTTGCTGTGGCTCTGGCGTAGGCCGGTGGCTGCAGCTCCGATTCGACCCCTAGCCTGGGAACCTCCATATGCTGCGGGAGCGGCCCAAGAAATAGCAACAACAACAACAAAAGACAAAAAAATAAAAATAAAATTTAAAAA	C	12	LW4,LW6,LW7,LA7	-	-	intergenic_variant	MODIFIER	-	-	-	0	0	4	4
sv_00297	1	16809813	16810096	283	DEL	AGACTTTATGGTTCTTTTTTTTTTTTTTTTTTTGTCTTTTTTGCTATTTCTTGGGCTGCTGCCACAGCATATGGAGGTTCCCAGGCCAGGGGTCGAATCGCAGCTGTAGCCACCGGCCTACGCCAGAGCCACAGCAACGCGGGATCCGAGCCGCGTCTGCAACCTACACCACAGCTCACGGCAACGCCGGATCGTTAACCCACTGAGCAAGGGCAGGTATCGAACCTGCAACCTCATGGTTCCTAGTCGGATTCGTTAACCACTGCGCCACGACGGGAACTCCC	A	9	WXP2,WXP3,WXP4,WXP5,WXP6,XP1,XP2,XP3,XP4,XP6,DU3,DU7	-	-	intergenic_variant	MODIFIER	-	-	-	5	5	2	12
sv_00298	1	16822953	16823028	75	DEL	CTTTCCTTAGCAAGGCTAAGGATCCAGCCTTGCTGTGAGCTGTGGTGTAGGTCACAGACTCTGCTCAGATCCTGAG	C	15	WXP1,WXP2,WXP3,WXP5,WXP6,WXP7,XP2,XP3,XP5,XP6,XP7,LW5,LW6,LW7,LA7	-	-	intergenic_variant	MODIFIER	-	-	-	6	5	4	15
sv_00299	1	16906621	16907252	631	DEL	ATTGTTTTTGTCTAGAGGATCAACATATATGCCCCAAATATAGGAGCACCCAGATACATACAACAAATATTAACAGACATAAAGGGAGATATTGATGAGAATACAATCATAGTAGGAGACCTTAATACCCCCCTCACATCAATGGACAGATCCTCTAGACAGAAAACCAATAAAGCAACAGAGATCCTAAAGGAAACAATAGAAAAGTTAGACTTCATTGATATCTTCAGGACACTACATCCAAAAAAATCAGAATACACATTCTTCTCAAATGCTCATGGAACATTCTCAAGAATCGACCACATATTGGGACACAAAGCGAATCTCAATAAATTTAGGAGCGTAGAAATTATCTCAAGTATCTTCTCTGACCACAATGCCATGAAATTAGAAATCAAC…	A	12	WXP1,WXP2,WXP3,WXP5,WXP6,WXP7,XP1,XP3,XP6,XP7,LW7,LA7,DU7	ENSSSCG00000028974	ENSSSCT00000024450.3	intron_variant,feature_truncation	MODIFIER	UST	protein_coding	INTRON=6/9,STRAND=-1	6	4	3	13
sv_00300	1	16914616	16914616	61	INS	A	AAATCATTAAGCACACTGCATGTAGCATAGAGGCTGGAGGAGCCACCCTGGATCAGACGGCC	6	WXP5,XP1	ENSSSCG00000028974	ENSSSCT00000024450.3	intron_variant,feature_elongation	MODIFIER	UST	protein_coding	INTRON=6/9,STRAND=-1	1	1	0	2
sv_00301	1	16963375	16963490	115	DEL	TTAAAATAAACTTTTCTAACTGTAATTGTAATGTATACATGTAAGGATAACCTGACCCCCTTGCTGTACAGTGGGAAAATAAAATAAAATTTAATAAAAAAAAAAAAAAAATAAAA	T	19	WXP1,WXP2,WXP3,WXP4,WXP5,WXP6,WXP7,XP1,XP2,XP3,XP4,XP6,XP7,LW6,LW7,LA7	ENSSSCG00000028974	ENSSSCT00000024450.3	intron_variant,feature_truncation	MODIFIER	UST	protein_coding	INTRON=4/9,STRAND=-1	7	6	3	16
sv_00302	1	17052978	17053279	301	DEL	CAAGAAGTGACTAAATGCGGAGTTCCCGTCGTGGTGCAGTGGTTAACGAATCCGACTAGGAACCATGAGGTTGCGGGTTCGGTCCCTGCCCTTGCTCAGTGGGTTAACGATCCGGCGTTGCCGTGAGCTGTGGTGTAGGTTGCAGACGCAGCTCGGATCTTGCGTTGCTGTGGCTCTGGTGTAGGCCGGTGGCTACAGCTCCGATTCAACCCCTAGCCTGGGAACCTCCATATGCCGCGGGAGCGGCCCAAGAAATAGCAACAACAACAAAAAAAGACAAAAGACCAAAAAAAAAAAAAAAA	C	6	WXP4,WXP5,XP1,XP3,XP4,XP5,XP6,XP7,DU2	ENSSSCG00000028974	ENSSSCT00000024450.3	intron_variant,feature_truncation	MODIFIER	UST	protein_coding	INTRON=2/9,STRAND=-1	2	6	1	9
sv_00303	1	17159345	17159631	286	DEL	ACCAATTTATTTCTTTTTTTTTTTTTTTTTTTGTCTTTTTGTTGTTGCTATTTCTAGGGCCGCACCCTCGGCATATGGAGGTTCCCAGGCTAGGGGTTGAATCGGAGCTGTAGCCACCGGCCTACGCCAGAGCCACAGCAACACGGGATCCGAGCCGCGTCTGCAACCTACACCACAGCTCATGGCAACACCGGATCGTTAACCCACTGAGCAAGGGCAGGGACCGAACCCGCAACCTCATGGTTCCTAGTCGGATTCGTTAACCACTGCGCCACGACGGGAACTCC	A	13	XP2,XP3,LW7	-	-	intergenic_variant	MODIFIER	-	-	-	0	2	1	3
sv_00304	1	17160494	17160808	314	DEL	TAGAAGTGTATTGTACGGAGTTCCCGTCGTGGCGCAGTGGTTAACGAATCCAACTAGGAACCATGAGGTTGCGGGTTCGGTCCCTGCCCTTGCTCAGTGGGTTAACGATCCGGCGTTGCCGTGAGCTGTGGTGTAGGTTGCAGACGCGGCTCGGATCCCGCGTTGCTGTGGCTCTGGCGTAGGCCAGTGGCTGCGGCTCCGATTCAACCCCTAGCCTGGGAACCTCCACATGCCGCGGGAGCGGCCCAAGAAATAGCAACAACAACAACAACAAAAAGACAAAAGACAAAAAAAAAAAAAAAAAAAAAAGAAAAA	T	15	WXP6,XP2,XP3,XP5,XP6,LW6,LW7	-	-	intergenic_variant	MODIFIER	-	-	-	1	4	2	7
sv_00305	1	17264709	17265043	334	DEL	GTGGAGACAGACTTTTATTTTATTTTTTTTGTTTTTTTTTTGTTTTTTTGTTTTTTGTTTTGTTTTTTTGTTTTGTTTTGTTTTTGTCTTTTTGCTATTTCTTTGGGCCGCTCCCACGGCATATGGAGGTTCCCAGGCTAGGGGTCCAATCGGAGCTGTAGCCGCCAGCCTACACCAGAGCCACAGCAACGCGGGATCCGAGCCGCGTCTGCGACCTACACCACAGCTCACGGCAACGCCGGATCATTAACCCACTGAGCAAGGGCAGGGACCGAACCCGCAACCTCATGGTTCCTAGTCGGATTCGCTAACCACTGCGCCACGACGGGAACTCC	G	15	WXP4,WXP7,XP1,XP5,XP6,XP7	-	-	intergenic_variant	MODIFIER	-	-	-	2	4	0	6
sv_00306	1	17265831	17266123	292	DEL	AGTTTGGCATTTTTTTTTTTTTCTTTTGTCTTTTTGTTGTTGTTATTGTTGCTATTTCTTGGGCCGCTCCCGCAGCATATGGAGGTTCCCAGGCTAGGGGTCCAATCGGAGCTGTAGCCACCGGCCTACGCCAGAGCCACAGCAACGCGGGATCCGAGCTGCATCTGCAACCTACACCACAGCTCACGGCAACGCCGGATCGTTAACCCACTGAGCAAGGGCAGGGACCGAACCCGCAACCTCATGGTTCTTAGTCGGATTCGTTAACCACTGCGCCACGACGGGAACTCCTG	A	10	WXP2,WXP3,WXP4,WXP5,WXP6,WXP7,XP1,XP3,XP5,XP6	-	-	intergenic_variant	MODIFIER	-	-	-	6	4	0	10
sv_00307	1	17287837	17288145	308	DEL	TAAAAACGTCTGGGGGGGGAGTTCCCGTCGTGGCGCAGTGGTTAACGAATCCGACTAGGAACCATGAGGTTGCGGGTTCGGTCCCTGCCCTTGCTCAGTGGGTTAACGATCCGGCGTTGCCGTGAACTGTGGTGTAGGTTGCAGACACGGCTCGGATCCCGAGTTGCTGTGGCTCTGGCGTAGGCCGGTGGCTACAGCTCCGATTCAACCCCTAGCCTGGGAGCCTCCATATGCCGCGGGAGCAGCCCAAGAAACAGCAACAACAACAAAAAAGACAAAAAGACAAAAAAAACAAAAAAACAAAAAACA	T	21	WXP3,WXP4,WXP5,XP3,XP6	-	-	intergenic_variant	MODIFIER	-	-	-	3	2	0	5
sv_00308	1	17289889	17289956	67	DEL	AAGACAAACACACACATATATATATATATATATATACATATATATATATATATATATATATATACACT	A	6	WXP5,XP7	-	-	intergenic_variant	MODIFIER	-	-	-	1	1	0	2
sv_00309	1	17368964	17370111	1147	DEL	CATGAGTATGGAGTTCCCGTCGTGGCGCAGTGGTTAACGAATCCGACTAGGAACCATGAGGTTGCGGGTTCGGTCCCTGCCCTTGCTCAGTGGGTTAACGATCTGGCGTTGCCATGAGCTGTGGTGTAGGTTGCAGATGCGGCTCGGATCCCGCGTTGCTGTGGCTCTGATGTAGGCTGGTGGCTACAGCTCCGATTCGACCCCTAGCCTGGGAACCTCCATATGCCGCGGGAGCGGCCCAAGAAATAGCAAAAAAGACAACAACAACAACAAAATAATAATAAAATAAATAAATAAATAAAACTTTCAGAAGTAAACTGAAACTCTATAAATTTGCTTTAAAATATACAAGGTTATCAAATAAAGATAATTGCCTTTGGGAGCAGAGTGGAATATAAA…	C	12	XP1,XP2,XP5	ENSSSCG00000033175	ENSSSCT00000031199.3	intron_variant,feature_truncation	MODIFIER	SASH1	protein_coding	INTRON=5/16,STRAND=-1	0	3	0	3
sv_00310	1	17436890	17437723	833	DEL	GAAAAAAAAATTATTTAGCTACCATGAGATACCACCTCACACCAGTCAGAATGGCCATCATTAATAAATCCACAAATAACAAGTGCTGGAGGGGCTGTGGAGAAAAGGGAACCCTCCTGCACTGTTGGTGGGAATGTAAACTGGTACAGCCACTATGGAGAACAGTTTGGAGATACCTTAGAAATCTATACATAGAACTTCCATATGACCCTGCAATCCCACTCTTGGGCATCTATCCGGACAAAGCTCTACTTAAAAGAGACACATGCACCCGCATGTTCATTGCAGCACTATTCACAATAGCCAGGACATGGAAACAATCCAAATGTCCATCGACAGAGGATTGGATTCGGAAGATGTGGTATATATACACGATGGAATACTACTCAGCCATTAAAA…	G	17	WXP2,WXP3,WXP4,WXP5,WXP6,WXP7,XP1,XP2,XP3,XP4,XP6,XP7,LW5,LW6,LW7,LA4,LA5,LA6,LA7,DU3	ENSSSCG00000033175	ENSSSCT00000042353.2	intron_variant,feature_truncation	MODIFIER	SASH1	protein_coding	INTRON=2/19,STRAND=-1	6	6	8	20
sv_00311	1	17446286	17446626	340	DEL	CAGCCGTCTACTGATGGATGAGTGGACAAACAAAACGTGGTATACACATACAATGGAATATTATTCAGCCTTTAAAAAGCAAGGAAGTTCTGACACATGCTGCTACATGGGGAAACCTTGAGGACACTATACAACATGAAATAAGCCAGTCCTCAAAGAACAAATACTATATGATGCCACTGATATGAGGTACTAGAGGCTAAATCCATAGAAACAGAAGGCAGAATGGCTTCCAGGAGTTGGGGGAGCAGGGAGCAGGGACTTACTGCTCTGTCGGCACCAGGTTTTGGTTTTGCAGAATGAAGATCCTGTGGCTGGATGGTGGTAATGAGAGCACAATG	C	10	WXP7,XP1,XP3,XP5	ENSSSCG00000033175	ENSSSCT00000042353.2	intron_variant,feature_truncation	MODIFIER	SASH1	protein_coding	INTRON=2/19,STRAND=-1	1	3	0	4
sv_00312	1	17505750	17506034	284	DEL	CAAAAACAGGAGTTCCCGTCGTGGCGCAGTGGTTAACGAATCCGACTAGGAACCATGAGGTTGCGGGTTCAATCCCTGGCCTTGCTCAGTGGGTTAACGATCCGGCGTTGCCGTGAGCTGTGGTGTAGGTTGCAGACTCGGCTCGGATCCCGCATTGCTGTGGCTCTGGCGTAGGCTGGTGGCTGCAGCTCCGATTCAACCCCTAGCCTGGGAATCTCCATATGCCTCGGGAGCGGCCCAAGAAATAGCAACAACAACAACAAAAGACAAAATACAAAAAAAAAA	C	13	WXP3,WXP6,XP3,XP6,XP7,LW4,LA5,LA6,LA7,DU1,DU7	ENSSSCG00000033175	ENSSSCT00000042353.2	intron_variant,feature_truncation	MODIFIER	SASH1	protein_coding	INTRON=1/19,STRAND=-1	2	3	6	11
sv_00313	1	17555387	17555475	88	DUP:TANDEM	AACGCCAGATCCTTAACCCACTGAGCGAGATCAGGGATCGAACTTGCATCCTCATGGATACTAGTTGGATGTGTTACCACTGAGCCACG	AACGCCAGATCCTTAACCCACTGAGCGAGATCAGGGATCGAACTTGCATCCTCATGGATACTAGTTGGATGTGTTACCACTGAGCCACGACGCCAGATCCTTAACCCACTGAGCGAGATCAGGGATCGAACTTGCATCCTCATGGATACTAGTTGGATGTGTTACCACTGAGCCACG	4	XP6,DU1,DU5	ENSSSCG00000033175	ENSSSCT00000049782.2	intron_variant	MODIFIER	SASH1	protein_coding	INTRON=1/19,STRAND=-1	0	1	2	3
sv_00314	1	17563384	17563678	294	DEL	TCAGTCAGTTCCATTTCTTTTTTTTTTTTTTTTTTTTTTTGGTCTTTTTGCTATTTCTTGGTCTTGGGCCGCTCCTGCGGCATATGGAGATTCCCAGGCTAGGGGTCCAATCGGAGCTGTAGCCACCGGCCTACACCAGAGCCACAGCAACGCGGGATCCGAGCCGCATCTGTAACCTACACCACAGCTCACGGCAACGCCGGATCGTTAACCCACTGAGCAAGGGCAGGGACCGAACCCGCAACCTCATGGTTCCTAGTCGGATTCGTTAACCACTGCGCCACGACGGGAACTC	T	10	WXP2,WXP5,WXP6,WXP7,XP3,XP4,XP5,XP6,DU7	ENSSSCG00000033175	ENSSSCT00000049782.2	intron_variant,feature_truncation	MODIFIER	SASH1	protein_coding	INTRON=1/19,STRAND=-1	4	4	1	9
sv_00315	1	17567965	17568207	242	DEL	TCTCTTCCTTTCACTTTTTTTTTTTTTTTTTTTTTTTTATTATCTTCCCACTGTACAGCAAGGGGGTCAGGTCATCCTTAGATGTATACATTGCAGTTACAGTTTTTTCCCCCACCCTTTCTTCTGTTGCGACATGAGTATCTAGACATAGTTCTCAATGCTATTCAGCAGGATCTCCTTATAAATCTATTCTAGGTTGTGTCTGATAAGCCCAAGCTCCCGATCCCTCCCACTCCCTCCCCC	T	5	XP3,XP7	ENSSSCG00000033175	ENSSSCT00000049782.2	intron_variant,feature_truncation	MODIFIER	SASH1	protein_coding	INTRON=1/19,STRAND=-1	0	2	0	2
sv_00316	1	17592482	17592893	411	DEL	TTAATTTGGGTTTTATTGTTTTTTTTTTTTTTTTTGTCTTTTTGTTGTTGTTGTTGTTGTTGTTGTTGTTGCTATTTCTTGGGCCGCTCCCGCGGCATTATTGTTGTTGTTGTTGTTGTTGCTATTTCTTGGGCCGCTCCCGCGGCATTATTGTTGTTGTTGTTGTTGTTGCTATTTCTTGGGCCGCTTCCGCGGCATATGGAGGTTCCCAGGCTAGGGGTTGAATCGGAGCTGTAGCCACCAGCCTACGCCAGAGCCACAGCAACGCAGGATCCGAGCCGCGTCTGCAACCTACACCACAGCTCACGGCAACGCCGGATCGTTAACCCACTGAGCAAGGGCAGGGACCGAACCCGCAACCTCATGGTTCCTAGTCGGATTCGTTAACCACTGCGCCAC…	T	14	WXP2,WXP3,WXP4,WXP5,WXP6,WXP7,XP1,XP2,XP3,XP4,XP5,XP6,XP7,LW7	ENSSSCG00000033175	ENSSSCT00000062342.2	intron_variant,feature_truncation	MODIFIER	SASH1	protein_coding	INTRON=1/19,STRAND=-1	6	7	1	14
sv_00317	1	17606693	17607081	388	DEL	TAATGCCATATACAAATGAGAAGGTGGAGGCTTGAAGAAGTAAAGCCAACTGCCCAAGGTCACAGAGCTAACAAGTGGTGGTGGGGGGCACTTGAACTCTGATCCTGTGACTCTAGAACCTACACTCTGCACCATGAAGCTTTACTGCTTTGGGAAGCTGTACGATATTGCAGCTTATTCCTTCTCTGATAGCCAGCTGGTGTTCAAGATTGTCTGTCTAAGAATGATCAAGTAAATATAGACAACAGGAGTTCTGTCGTGGAAACAAATCCGACTAGGAACCATGAGGTTGCGGGTTCGATCCCTGCCCTCACTCAGTGGGTTAAGGATCCAGCATTGCTGTGAGCTGTGGTGTAGGTCACAGATGCGGCTCGGATCCCGCGTTGCTG	T	11	WXP5,WXP7	ENSSSCG00000033175	ENSSSCT00000062342.2	intron_variant,feature_truncation	MODIFIER	SASH1	protein_coding	INTRON=1/19,STRAND=-1	2	0	0	2
sv_00318	1	17649823	17650281	458	DEL	AGCAACGCAGGATCCGAGCCGCGTCTGCAACCTACACCACAGCTCACGGCAACGCTGGATCCTTAACCCACTGAGCAAGGCCAGGGATCGAACGTGCAAGCTCATGGTTCCTAGTTGGATTCGTTAACCACTGAGCTACGGCGAGAACTCCTCAAGTCAAAGATGTTTTAATATACAATATGAATATATCTGTCTTTATCTCAACACAATTGTAAAACATAACTTCTAATGTTCTTTAAATGGAGGAAGTGGCCCGCAAAGCCTACAGTGCCTGGGGACCAGGAAAGTCGTAACAGTGCCCTGTTTGTAAGTATACCCGGGAGGCACCAGGAAGCAACAGGACGCAGAAGGGTAGCACTTGCTCAGCAGCGCCCCCTGTAGGCAGGGGTGTGCGAGCTG…	A	10	WXP7,XP1,XP7	ENSSSCG00000033175	ENSSSCT00000062342.2	intron_variant,feature_truncation	MODIFIER	SASH1	protein_coding	INTRON=1/19,STRAND=-1	1	2	0	3
sv_00319	1	17682487	17682820	333	DEL	AGGGAATTTATTTTTTTTTTTTTTTTTTTTTTTTTTTTTTTTTTTTTTTTTAAATTTTTTATTTTTTTTTTTGGTCTTTTTGTCTTTGTTGTTGCTATTTCTTGGGCCGCTCCCTCGGCATATGGAGGTTCCCAGGCTAGGGGTCGAATCGGAGCTGTAGCCACCGGCCTACGCCAGAGCCACAGCAACGCGGGATCCGAGCCGCGTCTGCAACCTACACCACAGCTCACGGCAACGCCGGATCGTTGACCCACTGAGCAAGGGCAGGGACTGAACCCGCAACCTCATGGTTCCTAGTCGGATTCGTTAACCACTGCGCCACAACAGGAACTCC	A	19	WXP3,WXP4,WXP5,WXP6,WXP7,XP1,XP2,XP3,XP4,XP5,XP6,XP7,LW4,LW7,LA6,LA7,DU2,DU3,DU7	-	-	intergenic_variant	MODIFIER	-	-	-	5	7	7	19
sv_00320	1	17695217	17695217	53	INS	T	TGCAGTCTTCTCTCTCTTGGCCCCTTTCAATGATCACTTGCTATTCATTGAGAG	5	XP1,XP3,XP7,LW6,LW7	ENSSSCG00000048882	ENSSSCT00000084240.1	downstream_gene_variant	MODIFIER	-	lncRNA	DISTANCE=2335,STRAND=-1	0	3	2	5
sv_00321	1	17700189	17700484	295	DEL	TAGCCTATGATTTTTTTTTTTTTTTTTTTTTTTGTCTTTTTGTCTTTTTGTTGTTTCTATCTCTTGGGCCACTTCCGCGGCATATGGAGGTTCCCAGGCTAGGGGTTGAATCGGAGCTGTAGCCACTGGCCTACGCCAGAGCCACAGCAACGCGGGATCCGAGCCGCGTCTGCAACCTACACCACAGCTCACGGCAACGCCGGATCGTTAACCCACCGAGCAAGGGCAGGAACCGAACCCGCGACCTCATGGTTCCTAGTCGGATTCGTTAACCACTGCGCCACGACGGGAACTCC	T	19	WXP2,WXP3,WXP5,WXP6,XP2,XP3,XP4,XP6,XP7,LW5,LW6,LW7,LA6,LA7,DU7	ENSSSCG00000043818	ENSSSCT00000075707.1	upstream_gene_variant	MODIFIER	-	pseudogene	DISTANCE=1402,STRAND=1	4	5	6	15
sv_00322	1	17720566	17721268	702	DEL	CAGAATCTCATTTGCTATCAGTCACAACCTAGAATAGATTTACAAGGAGATCCCGCTGAGTAGCATTGAGAACTATGTCTAGATACTCATGTTGCAACAGAAGAAAGGGTGGGGGAAAAACTGTAATTGTAATGTATACATGTAAGGATAACCTGACCCCCTTGCTGTACAGTGGGAAAATAAAATTAAAAAAAAAAAAAAATAAAGTGTATCAATTACCTAACATGAATTATGCCATTTGCAACAATACGGATGGACTTGGAGGGCATTACACTAAGTGAAATTAGTCAGATAGACAAATACTGTATGATATCACTTATATGGGGAATCTAAAAAAATCCAACAAACTAGTAAATATAACAAAAAAGAAGCAGACTCACAGGTACAGAGAACAAACTA…	C	11	WXP2,WXP3,WXP4,WXP5,WXP6,XP1,XP2,XP3,XP5,XP6,XP7,LW4,LA4	-	-	intergenic_variant	MODIFIER	-	-	-	5	6	2	13
sv_00323	1	17807644	17807951	307	DEL	CCCAGGAGGACAATTATTATTATTATTATTTTTTGTCTTTTGTTGTTGTTGTTATCGTTGTTGTTGTTGCTATTTCTTGGGCCGCTCCCCGCGGCATATGGAGGTTCCCAGGCTAGGGGTTGAATCGGAGCTGTAGCCACCGGCCTACGCCAGAGCCACAGCAACACGGGATCCGAGCCGCGTCTGCAACCTACACCACAGCTCACGGCAACGCCGGATCGTTAACCCACTGAGCAAGGTCAGGGATCGAACCCGCAACCTCATGGTTCCTAGTCGGATTCGTTAACCACTGCGCCACGACGGGAACT	C	11	XP6,LW5,LW6,LA6,LA7	-	-	intergenic_variant	MODIFIER	-	-	-	0	1	4	5
sv_00324	1	17878655	17878946	291	DEL	TTAAAAAATGAGTACACAGAAAAGAAAATCATGGACTTGGAGAAGAGACTTGTGGCTGCCTGATGGGAGGGGGAGGGAGTGGGAGGGATCGGGAGCTTGGGCTTATCAGACACAACTTAGAATAGATTTACAAGGAGATCCTGCTGAAAAGCATTGAGAACTATGTCTAGATACTCATGTTGCAACAGAAGAAAGGGTGGGGGAAAAACTGTAATTGCAATGTATACATGTAAGGATAACCTGACCCCCTTGCTGTACAGTGGGAAAATAAAAAAAATAAAATAAAATAAAA	T	10	WXP7,XP5	ENSSSCG00000049293	ENSSSCT00000089685.1	non_coding_transcript_exon_variant,intron_variant,feature_truncation	MODIFIER	-	lncRNA	EXON=2/2,INTRON=1/1,STRAND=1	1	1	0	2
sv_00325	1	17925975	17926056	81	DEL	CCACTCAGAGCAATCAGTCATTAAGTGAATGGGGCAGGGACCAGCCCTCAGTCACGGTATTGGCCCCCATCCCCAGGGGCCA	C	10	WXP3,WXP5,WXP7,XP1,XP3,XP5,XP7,LW6,LW7,DU5	-	-	intergenic_variant	MODIFIER	-	-	-	3	4	3	10
sv_00326	1	17926272	17926334	62	DEL	CTGGGAACTTCACATGCTGTGGGCACAGCCCCCCCCCCCAAAAAAAAGGGAATAAAACATTTT	C	10	XP3,XP6,XP7	-	-	intergenic_variant	MODIFIER	-	-	-	0	3	0	3
sv_00327	1	18078633	18078946	313	DEL	CTGCTTCCGGAGTTCCCGTCGTGGTGCAGTGGTTAACGAATCCGACTAGGAACCATGAGGTTGCGGGTTCAGTCCCTGCCCTTGCTCAGTGGGTTAACGATCCGGCGTTGCCGTGAGCTGTGGTGTAGGTTGCAGACGCGGCTCGGATCCCGCGTTGCTGTGGCTCTGGTGTAGGCCGGTGGCTACAGCTCCGATTCAACCCCTAGCCTGGGAACCTCCATATGCCGCGGGAGCGGCCCAAGAAATAGCAACAACAACAACAACAACAAAAAATACAAAAGACAAAAGACAAAAAAAAAAAAAAAAACGCTGCT	C	9	WXP2,WXP3,WXP5,XP2,XP3,XP6,DU7	ENSSSCG00000041768	ENSSSCT00000069347.1	downstream_gene_variant	MODIFIER	-	lncRNA	DISTANCE=1834,STRAND=1	3	3	1	7
sv_00328	1	18102127	18102434	307	DEL	ACTGTTTTCTACTTTTCTTTTTTTTTTTTTTTGTCTTTTGTCTTTTTGTTGTTGTTGTTGTTGTTGTTGCTATTTCTTGGGCCGCTCCCGCGGCATATGGAGGTTCCCAGGCTAGGGGTTGAATCGGAGCTATAGCCACCGGCCTACGCCAGAGCCACAGCAACTCGGGATCCGAGCCGCGTCTGCAACCTACACCACAGCTCACGGCAACGCCGGATCGTTAACCCACTGAGCGAGGCCAGGGATCGAACCCGCAACCTCATGGTTCCTAGTCGGATTCGTTAACCACTGCGCCACGACGGGAACTC	A	8	WXP7,XP2,XP3,XP5,DU7	ENSSSCG00000042691	ENSSSCT00000068763.1	non_coding_transcript_exon_variant,intron_variant,feature_truncation	MODIFIER	-	lncRNA	EXON=2/2,INTRON=1/1,STRAND=-1	1	3	1	5
sv_00329	1	18178227	18178554	327	DEL	ACAGATGATTGGTTTTTTTTTTGTTTTGTTTTGTTTTTTTGGGTTTTTTTTTTGTCTTTTTGTCTTTGTTGTTGTTGTTGTTGTTGCTGCTATTTCTTGGGCCGCTCCCGCGGCATATGGAGGTTCCCAGGCTAGGGGTTGAATCGGAGCTGTAGCCACCGGCCTACGCCAGAGCCACAGCAACGCGGGATCCGAGCCGCGTCTGCAACCTACACCACAGCTCACGGCAACACCGGATCGTTAACCCACTGAGCAAGGGCAGGGACCGAACCCGCAACCTCATGGTTCCTAGTCGGATTCGTTAACCACTGCGCCACGACGGGAACTC	A	7	WXP6,XP3,XP6,LW6,LA4	-	-	intergenic_variant	MODIFIER	-	-	-	1	2	2	5
sv_00330	1	18223802	18225122	1320	DEL	AATTAAAAGCCAGCGTAATAAAACTGGTCTTCGTTTCGAGGTACCTGATATATGCAGTGTATTCTCGGGGTACAGCTAAGGATCACAAGCATATCTTTAATAAATCTAAAGACATGTAGGATAAAAGACGTGCAATGAAGGTCCTAAGGAACTTAACTCTCTGAGTCTTAGTTTCCCCACCTGTAAAATGGAGCAGTAATAGCAATTACTTTATTGGGTTATTATAAGGATTAAATGCAATTTGTATTCAGCTTTTGCTCTGACTGGTGAAAATACTTGGTATTTTTTTTTCACCAAGGCCATTCATTAGGGAGTTCCATGTTCCTCTCTCCCTGGTCCCAAGGCTCCACCCTCTTCCCACCTGACCATGTATACGCTGAGCACAAGGAATGGGAGCCC…	A	4	LW4,LW5	ENSSSCG00000045381	ENSSSCT00000071743.1	downstream_gene_variant	MODIFIER	-	lncRNA	DISTANCE=1883,STRAND=-1	0	0	2	2
sv_00331	1	18270987	18271287	300	DEL	TAGAAATATTCAAAAACTGGAGTTCCCATCGTGGCGCAGTGGTTAACGAATCTGACTAGGAACCATGAGGTTGCGGGTTCGGTCCCTGCCCTTGCTCAGTGGGTTAACGATCCGGCGTTGCCGTGAGCTGTGGTGTAGGTCGCAGACGCGGCTCGGATCCCGCGTTGCTGTGGCTCTGGCGTAGGCCGGTGGCTACAGCTCCGATTAGACCCCTAGCCTGGGAACCTCCATATGCCGTGGGAGCGGCCCAAGAAATAGCAACAACAGCAACAACAACAACAAAAGACAAAAAAAAAAAAAA	T	7	WXP3,WXP5,XP2	ENSSSCG00000048240	ENSSSCT00000076355.1	intron_variant,feature_truncation	MODIFIER	SAMD5	protein_coding	INTRON=1/1,STRAND=-1	2	1	0	3
sv_00332	1	18353428	18353717	289	DEL	TCTATTTGGTTTTTTTTTTTTTTTTGTCTTTTTGTCTTTTTGTTGTTGTTGTTGCTATTTCTTGGGCCGCTCCCGCGGCATATGGAGGTTCCCAGGCTAGGGGTCTAATCGGAGCTGTAGACACCGGCCTACGCCAGAGCCACAGCAACGCGGGATCCGAGCCACGTCTGCAACCTACACCACAGCTCACGGCAAAGCCGGATCGTTAACCCACTGAGCAAGGACAGGGACCGAATTTGCAACCTCATGGTTCCTAGTCGGATTTGTTAACCACTGCACCACGACGGGAA	T	10	WXP6,XP5,XP6,XP7,LW4,DU7	ENSSSCG00000004113	ENSSSCT00000004548.4	intron_variant,feature_truncation	MODIFIER	STXBP5	protein_coding	INTRON=27/28,STRAND=-1	1	3	2	6
sv_00333	1	18353442	18353442	75	INS	T	TTACTGTTGAGTTGTAAGAATTCTTTTTATATTTTGGATATTAGACTCTTATCAGATTACGATTTTTGATTTTTAA	3	XP2,XP3	ENSSSCG00000004113	ENSSSCT00000004548.4	intron_variant,feature_elongation	MODIFIER	STXBP5	protein_coding	INTRON=27/28,STRAND=-1	0	2	0	2
sv_00334	1	18373490	18373771	281	DEL	TTCTTTTCTTTTTTTTTTTTGTCTTTTTGTCTTTTGTTGTTGTTGTTGCTATTTCTTGGGCCGCTCCTGCGGCATATGGAGGTTCCCAGGCCAGGGGTTGAATCGGAGCTGTAGCCACCGGCCTACGCCAGAGCCACAGAAATGTGGGATCCGAGCCGCGTCTGCAACCACAGCTCACGGCAACGCCGGATCGTTAACCCACTGAGCAAGGGCAGGGACCGAACCCGCGACCTCATGGTTCCTAGTCGGATTCGTTAACCACTGCGCCACGACGGGAACTCC	T	8	WXP2,WXP5,WXP6,WXP7,XP1,XP2,XP4,XP5,XP6,XP7,LW4,DU7	ENSSSCG00000004113	ENSSSCT00000004548.4	intron_variant,feature_truncation	MODIFIER	STXBP5	protein_coding	INTRON=23/28,STRAND=-1	4	6	2	12
sv_00335	1	18407916	18408017	101	DUP:TANDEM	AACATGAATCACAAAGGGTACCCCTAAAATGTACTGAGTTGCGGTCACATTTGCCCATGGATAGTCTATATATAAGGCAATACACTCAGAACTATACACTGG	AACATGAATCACAAAGGGTACCCCTAAAATGTACTGAGTTGCGGTCACATTTGCCCATGGATAGTCTATATATAAGGCAATACACTCAGAACTATACACTGGACATGAATCACAAAGGGTACCCCTAAAATGTACTGAGTTGCGGTCACATTTGCCCATGGATAGTCTATATATAAGGCAATACACTCAGAACTATACACTGG	8	WXP7,XP5,LW4	ENSSSCG00000004113	ENSSSCT00000004548.4	intron_variant	MODIFIER	STXBP5	protein_coding	INTRON=17/28,STRAND=-1	1	1	1	3
sv_00336	1	18541702	18541997	295	DEL	GTCCTTCTTTTTTTTTTTTTTTTTTTTTGTCTTTTTGTCTTTTGTTGTTGTTGTTGCTATTTCTTGGGCCGCTCTCGCGGCATATGGAGGTTCCCAGGCTAGGGGTCCAATCGGAGCTGTAGCCACCGGCCTACACCAGAGCCACAGCAACACAGGATCCGAGGCATGTCTGCAATCTACACCACAGCTCACGGCAACGCCGGATCGTTAACCCACTGAGCAAGGGCAGGGACCGAACCCGCAACCTCATGGTTCCTAGTCGGATTCGTTAACCACTGCGCCACGACGGGAACTCC	G	13	WXP1,WXP2,WXP4,WXP5,WXP6,WXP7,XP1,XP2,XP3,XP4,XP5,XP6,XP7,DU7	-	-	intergenic_variant	MODIFIER	-	-	-	6	7	1	14
sv_00337	1	18766283	18766555	272	DEL	TCAGGAGATTATTTTTTTTTTTTTTTTTTTTTTGTCATTTCTTGGGCTGCTCCCGCAGCATATGGAAGTTCCCAGGCTAGGGGTCTAAATGGAGCTGTAGCTGCCAGCCTACGCCAGAGCCACAGCAACGCAGGATCTGAGCCGCGTCTGCAACCTACACCACAGCTCACGGCAACGCCGGATCGTTAACCCACCGAGCAAGGGCAGGGATCGAACCCGCAACCTCATGGTTCCTAGTCGGATTCGTTAACCACTGCGCCATGACGGGAACTC	T	14	WXP1,WXP3,WXP5,WXP6,XP1,XP3,XP4,XP5,XP6,XP7,LW4	ENSSSCG00000043354	ENSSSCT00000076724.1	upstream_gene_variant	MODIFIER	-	protein_coding	DISTANCE=960,STRAND=-1	4	6	1	11
sv_00338	1	18845314	18846053	739	DUP:TANDEM	CATGGTCACATTATATTAAATGAGGAAAACAACAGATTTTTAACCGATGTGTACATTATAACACTTTGTAGGAAGCATATCCAACATTAGGGGGGAAAGGCCATTAGTTCATACACTAAATTAAATGACAACATTTATCTCTAGGGTAGGGTATTATTTTATTCTCTTTATTTCCAGATCTGTATTTTTCTAATTTTCTACAATTAACATGTTTGGCTTGGACTTTTTTTTTTTTTTTTTTTTGCCTTACCCACGACATATAGAAGTTCCCTGGGCCAGGGACTGAAGCCCGGCCACCACAGAGACGACATGGGATCCTTAACCTGCTGCTATCCTTAACCTGCTGCTGAATCCACAGTGGGGACTCCCTTCTTATTTTTCTTTTAAAAATATTTTTGT…	CATGGTCACATTATATTAAATGAGGAAAACAACAGATTTTTAACCGATGTGTACATTATAACACTTTGTAGGAAGCATATCCAACATTAGGGGGGAAAGGCCATTAGTTCATACACTAAATTAAATGACAACATTTATCTCTAGGGTAGGGTATTATTTTATTCTCTTTATTTCCAGATCTGTATTTTTCTAATTTTCTACAATTAACATGTTTGGCTTGGACTTTTTTTTTTTTTTTTTTTTGCCTTACCCACGACATATAGAAGTTCCCTGGGCCAGGGACTGAAGCCCGGCCACCACAGAGACGACATGGGATCCTTAACCTGCTGCTATCCTTAACCTGCTGCTGAATCCACAGTGGGGACTCCCTTCTTATTTTTCTTTTAAAAATATTTTTGT…	4	DU2,DU7	-	-	intergenic_variant	MODIFIER	-	-	-	0	0	2	2
sv_00339	1	18977752	18978064	312	DEL	TGCCTCTGATTTTTATTTTTATTTTTTTTGTCTTTTTTTTTTGTTGTTGTTGTTGTTGTTGTTGTTGTTGTTGCTATTTCTTGGGCCGCTCCCGTGGCATATGGAGGTTCCCAGGCTAGGGGTCGAATCGGAGCTGTAGCCACCAGCCTACGCCAGAGCCACAGCAACGCGGGATCCGAGCCGCGTCTGCAACCTACACCACAGCTCACGGCAACGCCGGATCGTTAACCCACTGAGCAAGGGCAGGGACCGAACCCGCATCCTCATGGTTCCTAGTCGGATTCGTTAACCACTGCGCCACGAGGGGAACTCC	T	17	WXP3,WXP6,WXP7,XP1,XP2,XP3,XP4,XP5,XP6,XP7,LW4,LW5,LA7,DU7	ENSSSCG00000004114	ENSSSCT00000004549.4	intron_variant,feature_truncation	MODIFIER	RAB32	protein_coding	INTRON=9/34,STRAND=-1	3	7	4	14
sv_00340	1	18998614	18998925	311	DEL	TAATAAATATTTAGGAGTTCCCGTCGTGGCGCAGTGGTTAACGAATCCGACTAGGAACCATGAGGTTGTGGGTTCGGTCCCTGCCCTTGCTCAGTGGGTTAACGATCCGGCGTTGCCGTGACCTGTAGTGTAGGTTGCAGACGCGGCTCGGATCCCGCGTTGCTGTGGCTCTGGCGTAGGCCGGTGGCTACAGCTCCGATTCAACCCCGAGCCTGGGAACCTCCATATGCCGCGGGAGCGGCCCAAGAAATAGCAACAACAACAAAAGACAAAAAGACAAAAGACAAAAATAAATAAATAAATAAATAAATA	T	7	XP3,XP6,LW7	ENSSSCG00000004114	ENSSSCT00000004549.4	intron_variant,feature_truncation	MODIFIER	RAB32	protein_coding	INTRON=4/34,STRAND=-1	0	2	1	3
sv_00341	1	19053041	19061494	8453	DEL	GCTCATTTTTCTTTTTTTTTTTTTTTTTTTTTTTTTTTTTTTTTTTTTTTTTTTTTAATTTTATTTTCCCACTGTACAGCAAGGGGGTCAGGTTATCCTTACATGTATACATTACAATTACAGTTTTTCCCCCACCATTTCTTCTGTTGCAACATGAGTATCTAGACATAGTTCTCAATGCTATTCAGCGGGATCTCCTTGTAAATCTATTCTAAGTTGTGTCTGATAAGCCCAAGCTCCCGATCCCTCCCACTCCCTCCCCCTCCCATCAGGCAACCACAAGTCTCTTCTCCAAGTCCATGATTGATTTTCTTTTCTGAGGAGATGTTCATTTGTGCTGGATATTAGATTCCAGTTATAAGTGATGTCATATGGTATTTGTCTTTGTCTTTCTGGCTC…	G	12	XP1,XP2,XP3,XP4,XP5,XP6,LW5,DU5	ENSSSCG00000004114	ENSSSCT00000004549.4	intron_variant,feature_truncation	MODIFIER	RAB32	protein_coding	INTRON=2/34,STRAND=-1	0	6	2	8
sv_00342	1	19166448	19166526	78	DEL	TTTACATGTGCATATATAATAAACTAAACACTGAACAAGACTTTTCTTTTCTTTTTTTTTTTCTGTTTTCCTTTATATC	T	11	WXP1,WXP2,WXP3,WXP5,WXP7,XP1,XP2,XP5	-	-	intergenic_variant	MODIFIER	-	-	-	5	3	0	8
sv_00343	1	19323726	19324033	307	DEL	TAAAAAAATCAACTTCTGGAGTTCCCGTCGTGGCGCAGTGGTTAACGAATCCGACTAGGAACCATGAGGTTGCGGGTTCGGTCCCTGCCTTGCTCAGTGGGTTCACGATCTGGCGTTGCCGTGAGCTGTGGTGTAGGTTGCAGACGCGGCTCGGATCCTGCGTTGCTGTGGCTCTGGTGTAGGCTGGTGGCTACAGCTCCGATTCAACCCCTAGCCTGGGAACCTCCATATGCCGCGGAGCGGCCCAAGAAATAACAACAACAACAACAAAAAAAAAAAAAAAAAAAAAAAAAAGACAAAAAGACAAA	T	29	XP3,XP4,XP6,LW4,LW6,LA6,LA7,DU3	ENSSSCG00000004119	ENSSSCT00000045502.2	intron_variant,feature_truncation	MODIFIER	GRM1	protein_coding	INTRON=3/10,STRAND=-1	0	3	5	8
sv_00344	1	19376438	19376628	190	DEL	TAAGATGCCTATTTGTTACCTCGGAATACACCTAACCAAAGAGGTAAAGGACCTATATGCCGAGAACTATAAAACCTTAATCAAAGAAATCAAAGAAGATGTAAAAAAATGGAAAGATATTCCATGTTCCTGGATTGGAAAAATCAATATTGTGAAAATGGCCATCCTACCCAAAGCAATCTACAGATTCA	T	13	WXP1,WXP3,WXP4,WXP5,WXP6,WXP7,XP1,XP2,XP3,XP4,XP5,XP6,LW5,LW6,DU7	ENSSSCG00000004119	ENSSSCT00000045502.2	intron_variant,feature_truncation	MODIFIER	GRM1	protein_coding	INTRON=3/10,STRAND=-1	6	6	3	15
sv_00345	1	19434652	19434926	274	DEL	TAATAAAGAAAATGGGAGTTCCCGTCATGGTGCAATGGTTAACGAATCCGACTAGGAACCATGAGGTTGCGGGTTCGATCCCTGGCCTCGCTCAGTGGGTTAAGGATCCCGCGTTGCTATGAGCTGTGGTGTAGATCGCAGACCCAGCTCAGATCCCACGTAGCGGTGGCTCTGGCGTAGGCCGGCGGCTACAGCTCCAATTAGACCCCTAGCCTGGGAACCTCCATATGTCATGAGAGCGGCCCAAGAAATGGCAAAAAGACAAAAAAAAAAAA	T	13	WXP1,WXP3,WXP4,WXP5,WXP6,WXP7,XP1,XP2,XP3,XP4,XP6,XP7,LW4,LW5,DU1,DU3	ENSSSCG00000004119	ENSSSCT00000045502.2	intron_variant,feature_truncation	MODIFIER	GRM1	protein_coding	INTRON=3/10,STRAND=-1	6	6	4	16
sv_00346	1	19501991	19502308	317	DEL	CCATGGATATATTTAATTTTTTTATTTTTTATTTTTTTTTGTCTTTTTGTTGTTGTTGTTGCTGTTGTTGTTGTTGTTGTTGCTATTTCTTGGGCCGCGGCAATATGGAGGTTCCCAGGCTAGGGGTTGAATCGGAGCTGTAGCCACCGGCCTACGCCAGAGCCACAGCAACGCGGGATCCGAGCCGCGTCTGCAACCTACACCACAGCTCACGGCAATGCCGGATCGTTAACCCACTGAGCAAGGCCAGGGACCGAACCCGCAACCTCATGGTTCCTAGTCGGATTCGTTAACCACTGCGCCACGACGGGAACTCCG	C	6	XP2,XP7	ENSSSCG00000004119	ENSSSCT00000045502.2	intron_variant,feature_truncation	MODIFIER	GRM1	protein_coding	INTRON=2/10,STRAND=-1	0	2	0	2
sv_00347	1	19516699	19516986	287	DEL	TAGAAATAATGGGAGTTCCCGTCGTGGCGCAGTGGTTAACGAATCCGACTAGGAACCATGAGGTTGCGGTTCGGTCCCTGGCCTTGCTCAGTGGGTTAAAGATCCGGCGTTGCCGTGAGCTGTGGTGTAGGTTGCAGACGCGGCTCGGATCCCGCGTTGCTGTGGCTCTGGCGTAGGCCAGTGGCTACAGCACCGATTCGACCCCTAGCCTGGGAACCTCCATATGGCGCAGGAGCGGCCCAAGAAATGGCAAAAAGACAAAAAAAAAAAAAAAGAAAGAAAAGAAAA	T	12	WXP3,WXP4,WXP5,WXP6,XP2,XP3,XP4,XP6,XP7,LW4,LW6,LA6,LA7,DU4,DU6,DU7	ENSSSCG00000004119	ENSSSCT00000045502.2	intron_variant,feature_truncation	MODIFIER	GRM1	protein_coding	INTRON=2/10,STRAND=-1	4	5	7	16
sv_00348	1	19520684	19520739	55	DEL	TCAGCTTTTAGAAGAAATAATAGCAACTTTTCTTAAGATGTCAGATATGGGTGAAA	T	3	WXP4,LW6	ENSSSCG00000004119	ENSSSCT00000045502.2	intron_variant,feature_truncation	MODIFIER	GRM1	protein_coding	INTRON=2/10,STRAND=-1	1	0	1	2
sv_00349	1	19529814	19530191	377	DEL	CTGAATTTTCTTTTTTTTTTTTTTTTTTTTTTTTTGTCTTTTGTCTTTTTGTTGTTGTTGTTGTTGTTATTGTTGCTATTTCTTGGGCCGCTCCCGCGGCATATGGAGGTTCCCAGGCTAGGGGTCCAATCGGAGCTGTAGCCACCGGCCTACGCCAGAGCCACAGCAACGCGGGATCCGAGCTGTGTCTGCAACCTACACCACAGCTCACGGCAACGCCGGATCGTTAACCCACTGAGCAAGGGCAGGGATCGAACCCGCAACCTCATGGTTCCTAGTCAGATTCGTTAACCACTGCGCCACGACGGGAACTCCTTTTTTTTTTTTTTTTTGTCTTTTGTCTTTTTGTTGTTGTTGTTGTTGTTGTTGTTATTGTTG	C	17	WXP3,WXP4,WXP5,WXP6,WXP7,XP1,XP2,XP3,XP4,XP5,XP6,XP7,LA6,LA7,DU1,DU7	ENSSSCG00000004119	ENSSSCT00000045502.2	intron_variant,feature_truncation	MODIFIER	GRM1	protein_coding	INTRON=2/10,STRAND=-1	5	7	4	16
sv_00350	1	19615483	19615564	81	DUP:TANDEM	CCCTCGGCATATGGAGGTTCCTAGGCTATGGGTCTAATCGGAGCTGTAGCTGCTGGCCTACACCAGAGCCACAGCAACGCGG	CCCTCGGCATATGGAGGTTCCTAGGCTATGGGTCTAATCGGAGCTGTAGCTGCTGGCCTACACCAGAGCCACAGCAACGCGGGATCCAAGCCACGTCTGCCTCGGCATATGGAGGTTCCTAGGCTATGGGTCTAATCGGAGCTGTAGCTGCTGGCCTACACCAGAGCCACAGCAACGCGG	4	WXP7,DU1,DU3	ENSSSCG00000004120	ENSSSCT00000004555.4	intron_variant	MODIFIER	SHPRH	protein_coding	INTRON=1/28,STRAND=1	1	0	2	3
sv_00351	1	19615483	19615483	98	INS	C	CCCTCGGCATATGGAGGTTCCTAGGCTATGGGTCTAATCGGAGCTGTAGCTGCTGGCCTACACCAGAGCCACAGCAACGCGGGATCCAAGCCACGTCTG	5	WXP6,XP2,XP7	ENSSSCG00000004120	ENSSSCT00000004555.4	intron_variant,feature_elongation	MODIFIER	SHPRH	protein_coding	INTRON=1/28,STRAND=1	1	2	0	3
sv_00352	1	19736505	19736790	285	DEL	AGGATTCTATTTTTTTTTTTTTTTTTGTCTTTGTTGTTGTTGTTGCTATTTCTTTGGGCCGCTCCCGCGGCATATGGAGGATCCCAGGCTAGGGGTCCAATCGGAGCTGTAGCTGCCAGCCTACGCCAGAGCCACAGCAACGCGGGATCCGAGCCGCGTCTGCAACCTACACCACAGCTCACGGCAACGCCGGATTGTTAACCCACTGAGCAAGGGCAGGGACCGAACCTGCAACCTCATGGTTGCTAGTCGGATTCGTTAACCACTGCGCCACAACAGGAACTCT	A	11	WXP3,WXP6,XP3,XP6,XP7,LW4	ENSSSCG00000048523	ENSSSCT00000073668.1	non_coding_transcript_exon_variant,intron_variant,feature_truncation	MODIFIER	-	lncRNA	EXON=2/3,INTRON=1/2,STRAND=-1	2	3	1	6
sv_00353	1	19809822	19810086	264	DEL	TTCTAGTTACTTTTTTTTTTTTTTTTGTCTTTTTAGGTCCTCACTCGTGGCATATGGAGGTTCCCAGGCTAGAGGTCGAATTCGACCTGTAGCTGCTGGCTTACACCACAGCCACAGCAACACCAGATTCAAGCCACATCTGTGACCTACACCACAGCTCATGGCAACGCTGGATCCCTCACCCACTGAGAGAGGCCAGGGATCGAACCTGTATCCTCATGGATACTAGTCAGATTCCCTTCCGCTAAGTCACGACGGGAACTCC	T	10	WXP1,WXP2,WXP4,WXP6,WXP7,XP1,XP2,XP3,XP4,XP6,LW4,DU3,DU7	ENSSSCG00000004121	ENSSSCT00000004557.4	intron_variant,feature_truncation	MODIFIER	FBXO30	protein_coding	INTRON=1/3,STRAND=1	5	5	3	13
sv_00354	1	19814527	19814604	77	DEL	CATTCATTCTGAAAAAAAAAAAAAAAAAAAAAAAAAAAAAAAAAAAAAAAAAAAAAAAAAAAAAAAAAAAAAAAAAAA	C	14	WXP1,WXP2,WXP3,WXP4,WXP5,WXP6,WXP7,XP1,XP2,XP3,XP5,XP6,XP7,LW5,LW6,LW7,LA4,LA7,DU3,DU4,DU6,DU7	ENSSSCG00000004121	ENSSSCT00000004557.4	intron_variant,feature_truncation	MODIFIER	FBXO30	protein_coding	INTRON=1/3,STRAND=1	7	6	9	22
sv_00355	1	19822343	19822396	53	DEL	AAAAAAAAAAAAAAAAAAAAAAAAAAAAAGACATGATTTTGTCATTGGCTTATT	A	15	WXP1,WXP3,WXP6,WXP7,XP1,XP2,XP3,XP6,LW4,DU3	ENSSSCG00000004121	ENSSSCT00000004557.4	intron_variant,feature_truncation	MODIFIER	FBXO30	protein_coding	INTRON=1/3,STRAND=1	4	4	2	10
sv_00356	1	19906012	19906125	113	DEL	TATAAATATTTAATTGTGAAAAATTAATATAAAATATAAACACATGCTTTAACACATATTTTAATATAAAATATAAACACATGCTTTAATAAAACATATTTATTTAATATTTAA	T	8	WXP7,XP1,XP2,XP6	ENSSSCG00000004121	ENSSSCT00000064623.2	intron_variant,feature_truncation	MODIFIER	FBXO30	protein_coding	INTRON=5/5,STRAND=1	1	3	0	4
sv_00357	1	19920985	19921258	273	DEL	TAAAAGATACTATTGGAGTTCCCGTCGTGGCGCAGTGGTTAACGAATCCGACTAGGAACCATGAGGTTGCGGGTTCGATCCCTGCCCTTGCTCAGTGGGTTAACGATCCGGCGTTGCCGTGAGCTGTGGTGTAGGTTGCAGACGCGGCTCGGATCCCGCGTTGCTGTGGCTCCAGCATAGGCTGGCAGCTACAGCTCCGATTGGACCCCTAGCCTGGGAACCTCCATATGCCGCAGGAGCGGCCCAAAGAAATAGCAAAAAAGACAAAAAAAAA	T	15	WXP4,WXP5,WXP7,XP3,XP4,XP6,XP7,LW4,LW7,LA4,DU5	ENSSSCG00000004121	ENSSSCT00000064623.2	intron_variant,feature_truncation	MODIFIER	FBXO30	protein_coding	INTRON=5/5,STRAND=1	3	4	4	11
sv_00358	1	19956610	19956915	305	DEL	TTCTTTCCTTTCTTTTTTTTTTTTTTTTTTTTTTTTTTGTCTTTTGTCTTTTTGTTGTTGTTGTTGCTATTTCTTGGGCCGCTCCCGCGGCATATGGAGGTTCCCAGGCTAGGGGTCGAATCGGAGCTGTAGCCACCGGCCTATGCCAGAGCCACAGCAACGCAGGATCCGAGCCGAGTCTGCAACCTACACCACAGCTCACGGCAACGCCGGATCGTTAACCCACTGAGCAAGGGCAGGGACCGAACCCGCAACCTCATGGTTCCTAGTCGGATTCGTTAACCACTGCGCCATGACGGGAACTCC	T	4	LW1,DU7	ENSSSCG00000004121	ENSSSCT00000064623.2	intron_variant,feature_truncation	MODIFIER	FBXO30	protein_coding	INTRON=5/5,STRAND=1	0	0	2	2
sv_00359	1	19964266	19964405	139	DEL	TAAAGAAAACAGCCCAAACTGCAATGTATACATCTAAGGATAACCTGACCCCCTTTCTGTACAGTGGGAAAATAGAAATTAAAACCCACAATGAAAAAAAAAAAATAAATAAATAAATAAATAAATAAATAAATAAAAAA	T	6	WXP6,XP1,XP2,XP3,XP4,XP6,LA2,DU7	ENSSSCG00000004121	ENSSSCT00000064623.2	intron_variant,feature_truncation	MODIFIER	FBXO30	protein_coding	INTRON=5/5,STRAND=1	1	5	2	8
sv_00360	1	19970074	19970148	74	DEL	TATTTGTGTTTTTTTTTAATTTATTATTATTATTTTTAAATTTTTTTTTATTTTCCCACGGTACAGCACAGCAAG	T	10	XP3,XP6	ENSSSCG00000004121	ENSSSCT00000064623.2	intron_variant,feature_truncation	MODIFIER	FBXO30	protein_coding	INTRON=5/5,STRAND=1	0	2	0	2
sv_00361	1	20004666	20004997	331	DEL	TAAAATGACCAAGGGGAGTTCCCGTCGTGGCACAGTGGTTAACGAATCCGACTAGGAACCATGAGGTTGCGGGTTCGGTCCCTGCCCTTGCTCAGTGGGTTAACGATCCGGTGTTGCCGTGAGCTGTGGTGTAGGTTGCAGACGCGGCTCAGATCCCGCGTTGCTGTGGCTCTGGCGTAGGCCGGTGGCTATGGCTCCGATTCGACCCCTAGCCTGGGAACCTCCATATGCCGCAGGGGCGGCCCAAGAAATAGCAACAACAACAACAAAAGACAAAAATAAATAAATAAATAAATAAATAAATAAATAAATAAAGTAAAAAAAAAAAAAAA	T	15	WXP4,WXP5,WXP6,WXP7,XP2,XP3,XP6,LA5,LA6,LA7	ENSSSCG00000004121	ENSSSCT00000064623.2	intron_variant,feature_truncation	MODIFIER	FBXO30	protein_coding	INTRON=5/5,STRAND=1	4	3	3	10
sv_00362	1	20026207	20026504	297	DEL	GCAGACTCTGGGTAATTTTTTTTTATTTAATTAATTAATTTATTTTTTTGTCTTTTTGCTATTTCTTTGGGCCGCTCCCGTGGCATATGGAGGTTCCCAGGCTAGGGGTCAAATCAGAGCTGTAGCCGACAGCCTACGCCAGAGCCACAGCAACGCGGGATCCGAGCCGTGTCTGCAACCTACACCACAGCTCACGGCAACGCCGGATCATTACCCCACTGAGCAAGGGTAGGGACCGAACCCGCAACCTCATGGTTCCTAGTCGGATTCGTTAACCACTGCGCCATGACGGGAACTC	G	13	WXP4,WXP5,WXP6,WXP7,XP2,XP3,XP4,XP5,XP6,XP7,LW5,LW7,LA5,LA6,DU1,DU3,DU5,DU7	ENSSSCG00000004121	ENSSSCT00000064623.2	downstream_gene_variant	MODIFIER	FBXO30	protein_coding	DISTANCE=1809,STRAND=1	4	6	8	18
sv_00363	1	20031848	20032143	295	DEL	TTAAAAGGTAGAAAGGGAGTTCCCGTCGTGGCGCAGTGGTTAACTAATCCGACTAGGAGCCATGAGGTTGCGGGTTCGGTCCCTGCCCTTGCTCAGTGGGTTAACGATCCGGCGTTGCCGTGAGCTGTGGTGTAGGTTGCAGACTCGGCTCGGATCCCGCGTTGCTGTGGCTCTGGCGTAGGCCGGTGGCTACAGCTCCGATTCAACCCCTAGCCTGGGAACCTCCATATGCCGAGGGAGTGGCCCAAGAAATAGCAACAATAACAACAACAACAACAACAACAAAAATAAATAAA	T	11	WXP1,WXP6,XP2,XP3,XP4,XP6,XP7	-	-	intergenic_variant	MODIFIER	-	-	-	2	5	0	7
sv_00364	1	20038648	20041047	2399	DEL	ACAAGTGAGAATAGTCTAACAGGGTTAAAAGAAAGGAGAGGAAAGCAGGGACTTTAAAGCTGATGAAACTCAGAGTAACTGAGGAAGAAGACCTTCTAACAACGGTGGCCTTTGGTAAAGATTGCAGGCAGCTGGGCTCAGCCTAACAGGGAGGGGCCAGAGGGAATCAATTCACAGATTCACCTCCCTATACATTTCCTCTCCTGCTCAGGCTCCACACTGGCTGGATGCAAACCAATAACCAGAGAGTTAGGGAGTCGGCTGAGGTCATGCAGTTTATAGCAATCAGCTCCTGAGGCATAGAGCAAGATGGAGAAGAGTAGAGAATTAACTGAGGATGGGCAATGGAAAGTTTCCAACACAAAATGTAGCATTTTTTTTTTTATATAATGGCCAAAT…	A	9	WXP2,WXP3,WXP5,WXP6,WXP7,XP2,XP3,XP5,XP6,DU5,DU7	-	-	intergenic_variant	MODIFIER	-	-	-	5	4	2	11
sv_00365	1	20042587	20042898	311	DEL	ATTGTAGCAAACAGGAGTTCCCGTCGTGGCGCAGTGGTTGACGAATCCGACTAGGAACCATGAGGTTGCGGGTTCGGTCCCTGCCCTTGCTCAGTGGGTTAAGGATCCGGCGTTGCCGTGAGCTGTGGTGTAGGTTGCAGACGCGGCTCGGATCCCGCGTTGCTGTGGCTCTGGCGTAGGCCGGTGGCTACAGCTCCGATTAGACCCCTAGCCTGGGAACCTCCATATGCCACGGGAGCGGCCCAAGAAATAGCAACAACAACAACAACAACGAAAAAAAGACAAAAAGACAAAAAAAAAAAAAAAAAAAAT	A	10	XP3,XP6,LW4,LW6,LA4,DU2,DU5	-	-	intergenic_variant	MODIFIER	-	-	-	0	2	5	7
sv_00366	1	20046670	20046984	314	DEL	CAAAACCAAATCACGGAGTTCCCGTCGTGGCGCAGTGGTTAACGAATCCGACTAGGAACCATGAGGTTGCGGGTTCGGTCCCTGCCCTTGCTCAGTGGGTTAACGATCCGGCGTTGCCGTGAGCTGTGGTGTAGGTTGCAGACGCGGCTCGGATCCTGCGTTGCTGTGCCTCTGGCGTAGGCCAGTGGCTACAGCTCCGATTCGACCCCTAGCCTGGGAACCTCCATATGCCACGGGAGCGGCCCAAGAAATAGCAAAAACAACAACAACAACAACAAAAAAAGACAAAAAGACAAAAAAAAAAAAAAAAAAAAA	C	14	WXP4,WXP5,WXP6,WXP7,XP1,XP3,XP4,XP5,XP6,XP7,LW4,LW5,LW6,LW7,LA6,LA7,DU1,DU2,DU3,DU4,DU5,DU7	-	-	intergenic_variant	MODIFIER	-	-	-	4	6	12	22
sv_00367	1	20058984	20059265	281	DEL	GTCATTTAATTTTTTTTTTTTTTTTTTTTTGTCTTTTTGCTATTTCTTTGGGCGGCTCCCGCGGCATATGGAGATTGCCAGGCTAGGGGTCTAATTGGAGCTGTAGCTGCCGGTCTACGCCAGAGCCACACCAACGCGGGATCCGAGCCGCGTCTGCAACCTACACCACAGCTCACGGCAACGCCGGATCGTTAACCCACTGAGCAGGGGCAGGGACCGAACCTGCAACCTCGTGGTTCCTAGTCGGATTCGTTAACCACTGCGCCACGACGGGAACTCCTA	G	5	XP3,XP4,XP6	-	-	intergenic_variant	MODIFIER	-	-	-	0	3	0	3
sv_00368	1	20209886	20210370	484	DEL	TTCCTAAGATTGTTGTAGTTATCATAAGAGAGATTCCAGACAGAGAAAAAAATATTCTTGCAACAGATGGGATAATGGTTCAGCACCACCTAGTTTAAATATGAAAAAGGGAGGAAGGATCACGATGATGGAGGAGTAAAATGCGATGCTCACCTTCTCCCCAAAACACATCAAAAAGCACATCTATGTATAGAAATGAGTCCCACAGAACATCTACTGAATGCTGGCAGAAGACCTTAAACCTCCAAAAAGGGCAAGAAACCCCCCACATAACTGGGTAGAACAAAAAGAGAGAGAGAGAGAGAGAGAAAAGGAATCAGAATGGGACTAGCACTCCTGAAAGGGAGCTGTGAAAGAGGAAAGAAATACACACCCTGGGAAGCCACCTAACTGCTGGGA…	T	12	WXP3,WXP5,XP3,XP6,DU1,DU7	-	-	intergenic_variant	MODIFIER	-	-	-	2	2	2	6
sv_00369	1	20249667	20249718	51	DEL	GCTCATTAGTTTTCAACCCAGTTTTTAAAAGCCCTGGGAAAAGAACAAGTCT	G	8	WXP7,DU7	-	-	intergenic_variant	MODIFIER	-	-	-	1	0	1	2
sv_00370	1	20256313	20256620	307	DEL	TAACTATATGAAATATTGGAGTTCCCGTCGTGGCGCAGTGGTTAACGAATCCGACTGGGAACCATGAGGTTGCGGGTTCGGTCCTTGCCCTTGCTCAGTGGGTTAACGATCCGGCGTTGCCGTGAGCTGTGGTGTAGATTGCAGACGCGGCTCGGATCCCGCGTTGCTGTGGCTCTGGCGTAGGCCGGTGGCTACAGCTCCGATTCAACCCCTAGCCTGGGAACCTCCATATGCCGCGGGAGCGGCCCAAGAAATAGCAACAATAACAACAACAACAACCAAAAAAAAGACAAAAAAAAAAAAAAAAA	T	7	WXP4,WXP7,XP1,XP2,XP4,XP5,XP6,LW4,LA6,DU1,DU2,DU5	-	-	intergenic_variant	MODIFIER	-	-	-	2	5	5	12
sv_00371	1	20379000	20379298	298	DEL	GGGAGGAGTTCCCGTCGTGGCGCAGTGGTTAACGAATCCGACTAGGAACCATGAGGTTGTGGGTTCGGTCCCTGCCCTTGCTCAGTGGGTTAACGATCCGGCGTTGCCATGAGCTGTGGTGTAGGTCGCAGACGCGGCTCGGATCCCGCGTTGCTGTGGCTCTGGCGTAGGCCGGTGGCTACAGCTCCGATTCAACCCCTAGCCTGGGAACCTCCATATGCCGCGGGAGCGGCCCAAGAAATAGCAACAACAACAACAACAAAAGACAAAAAGACAAAAAAAAAAAAAAAAAAAAGTTT	G	16	WXP3,WXP6,WXP7	ENSSSCG00000051757	ENSSSCT00000070875.1	intron_variant,non_coding_transcript_variant,feature_truncation	MODIFIER	-	lncRNA	INTRON=1/1,STRAND=-1	3	0	0	3
sv_00372	1	20436955	20437463	508	DEL	GAAAGTTATTCTTCTCCAGGGAATTGTTTATGATGAGAGACTCACACACACACACACACACATCTTGTATAACATGTCTCAAACTCTGTAAAAACTCTTGATTCCTAGGCATCAAAAAATCAGACGAATTTGGTCTTGGGGTTTTCTTCTTTTATCTAAGTTTAGACCAAACAAATTTCATCCCTGTGGAATACTGTAGGAGACATGGTAAAGATTTAGAAATTATTACATTTCTTAACCTTATGACAAGTATTCCAAAAAATGGAACGCCTCCAATTAGATATCTTACTCAGTTGCGTTTTTTTTTTTTTGGCATTTAATCTTAGAGGGAAGAAACAAGAGAAAATAAGTGAATCAGTAATAAGAATCCAAGAAATGAAATTTTAAGATGATTTCCAT…	G	12	WXP6,WXP7,XP1,XP2,XP3,XP4,XP5,XP6,XP7,LW1,DU5	ENSSSCG00000051757	ENSSSCT00000086958.1	intron_variant,non_coding_transcript_variant,feature_truncation	MODIFIER	-	lncRNA	INTRON=2/2,STRAND=-1	2	7	2	11
sv_00373	1	20500466	20500750	284	DEL	TAAAGAAAAATCAGGAGTTCCCGTCGTGGCGCAGTGGTTAACGAATCCGACTAGGAACCATGAGGTTGCGGGTTCGGTCCCTGCCCTTGCTCAGTGGGTTAACGATCCGGCGTTGCCGTGAGCTGTGGTGTAGGTTGCAGACGCGGCTCGGATCCTGCGTTGCTGTGGCCCTGGCGTAGGCTGGTGGCTACAGCTCCGATTGGACCTCTAGCCTGGGAACCTCCATATGCCGCAGGAGCGGCCCAAGAAATAGCAAAAAAAAAAAAAAAAGAAAAAAAAAAAAAA	T	10	WXP1,WXP4,WXP5,WXP6,WXP7,XP1,XP2,XP3,XP4,XP5,XP6,LW2,LW4,LW5,LW7,LA2,DU3,DU5	ENSSSCG00000051757	ENSSSCT00000086958.1	intron_variant,non_coding_transcript_variant,feature_truncation	MODIFIER	-	lncRNA	INTRON=1/2,STRAND=-1	5	6	7	18
sv_00374	1	20521633	20521940	307	DEL	TAATATCTAGTAATATCTGGAGTTCCCGTCGTGGCGCAGTGGTTAACGAATCCGACTAGGAACCATGAGGTTGCGGGTTCGGTCCCTGCCCTTGCTCAGTGGGTTAAGGATCCGGCGTTGCCGTGAGCTGTGGTGTAGGTTGCAGACGTGGCTCGGATCCCACGTTGCTGTGGCTCTGGCGTAGGCCGGTGGCTACAGCTCCGATTCAACCCCTAGCCTGGGAACCTCCATATGCCGCGGGAGCGGCCCAAGAAATAGCAACAACAACAACAAAAAAGACAAAAAAAAAAAAAAAAAAAAAAAAAAAA	T	13	WXP3,WXP7,XP1,XP2,XP3,XP4,XP5,XP6,XP7,LW1,LW4,LW5,LW6,LW7,LA1,LA2,LA4,LA6,DU3,DU4,DU5,DU7	ENSSSCG00000004123	ENSSSCT00000004558.4	intron_variant,feature_truncation	MODIFIER	UTRN	protein_coding	INTRON=23/24,STRAND=-1	2	7	13	22
sv_00375	1	20542384	20542669	285	DEL	TTCCTCTCAAATTCTTTTTTTTTTTTTTTTTTTTTGTCTTTTTGCTATTTCTTTGGGCCGCTCCCACGGCATGTGGAGGTTCCCAGGCTAGGGGTCCAATTGGAGCTGTATCCACTGGTCTATGCCAGAGCCACAGCAACGCGGGATCCGAGCCGCGTCTGCAACCTACACCACAGCTCACGGCAATGCCGGATCATCAACCCACTGAGCAAGGGCAGGGACCGAACCCCACAACCTCATAGTTCCTAGTCGGATTCATTAACCACTGCGCCACGACGGGAACTCC	T	7	WXP4,XP7,DU7	ENSSSCG00000004123	ENSSSCT00000004558.4	intron_variant,feature_truncation	MODIFIER	UTRN	protein_coding	INTRON=18/24,STRAND=-1	1	1	1	3
sv_00376	1	20667460	20667544	84	DUP:TANDEM	CACAAAAACAAACTCAAAACGGAGTAAAGCCTTAAATGTGAGACCTTAAACCATAAAACTCCTAGAAGAAAACATCTATGTAGT	CACAAAAACAAACTCAAAACGGAGTAAAGCCTTAAATGTGAGACCTTAAACCATAAAACTCCTAGAAGAAAACATCTATGTAGTACAAAAACAAACTCAAAACGGAGTAAAGCCTTAAATGTGAGACCTTAAACCATAAAACTCCTAGAAGAAAACATCTATGTAGT	7	LW6,LW7,DU3,DU7	ENSSSCG00000004123	ENSSSCT00000004558.4	intron_variant	MODIFIER	UTRN	protein_coding	INTRON=2/24,STRAND=-1	0	0	4	4
sv_00377	1	20743348	20743684	336	DEL	TTAAAATTCTGGAGTTCCCGTCGTGGCGCAGTGGTTAACGAGTCCGACTAGGAACCATGAGGTTGCGGGTTCGGTCCCTGCCCTTGCTCAGTGGGTTAACGATCCAGCGTTGCCGTGAGCTGTGGTGTAGGTTGCAGACGCGGCTCGGATCCCGCGTTGCTGTGGCTCTGGCCTAGGCCGGTGGCTACAGCTCCGATTCAACCCCTAGCCTGGGAGGGAACCTCCATATGCTGCGGGAGCGGCCCAAGAAATAGCAACAGCAACAACAACAACAACAACAACAACAACAAAAGACAAAAGACAAAAATAAATAAATAAAAAATAAAATAAAATAAAA	T	17	WXP1,WXP6,WXP7,XP1,XP4,XP6,LW4,DU5,DU7	ENSSSCG00000004123	ENSSSCT00000004558.4	intron_variant,feature_truncation	MODIFIER	UTRN	protein_coding	INTRON=1/24,STRAND=-1	3	3	3	9
sv_00378	1	20757924	20758225	301	DEL	TAAGTTACTCCTCATATGGAGTTCCCGTCGTGGCGCAGTGGTTAACGAATCCGACTAGGAACCATGAGGTTGCGGGTTCGGTCCCTGCCCTTGCTCAGTGGGTTAACGATCCGGCGTTGCCATGAGCTGTGGTGTAGGTTGCAGACGCGGCTCGGATCCTGCGTTGCTGTGGCTCTGGCGTAGGCCGGTGGCTACAGCTCCGATTCAACCCCTAGCCTGGGAACCTCCATATGCCGCGGGAGCGGCCCAAGAAATAGCAACAACAACAACAACAACAAAAGACAAAAAGGCAAAAAAAAAAA	T	14	WXP7,XP2,XP7,DU1	ENSSSCG00000004123	ENSSSCT00000061166.2	intron_variant,feature_truncation	MODIFIER	UTRN	protein_coding	INTRON=50/74,STRAND=-1	1	2	1	4
sv_00379	1	20818995	20819122	127	DEL	ATGATTATAAAAATCTTTTTTTTTTTTTCTTTTCTTTTTTTTTATTTTCCCACTGTACAGCAAGGGGATCAGGTTATCCTTACATGTATACATTACAATTACAGTTTTTCCCCCACCCTTTCTTCTGT	A	16	WXP3,WXP4,WXP5,WXP6,WXP7,XP3,XP4,XP5,XP6,XP7,LW5,LW6,LW7,LA6,LA7,DU4,DU5,DU6,DU7	ENSSSCG00000004123	ENSSSCT00000061166.2	intron_variant,feature_truncation	MODIFIER	UTRN	protein_coding	INTRON=38/74,STRAND=-1	5	5	9	19
sv_00380	1	20826527	20826854	327	DEL	TTAAAAGAACTTTTCTGGGGGGTGTTCCCGTCGTGGCGCAGTGGTAAACAAATCCGACTAGGAACCATGAGGTTGCTAGGAACCATGAGGTTGCGGGTTCGATCCCTGCCCTTGCTCAGTGGGTTAACGATCCGGCGTTGCCATGAGCTGTGGTGTAGATTGCAGGCGCGGCTCGGATCCTGCGTTGCTGTGGTTCTGGCGTAGGCTGGTGGCTACAGCTCCGATTGGACCCCTAGCCTGGGAACCTCCATATGCCGCATGAGCGGCCCAAGAAATGGCAGAAAGACAAAAAAACAAAAAACAAAAAACAAAAAACAAAAAAAATAAA	T	6	XP1,XP3,XP6,DU5	ENSSSCG00000004123	ENSSSCT00000061166.2	intron_variant,feature_truncation	MODIFIER	UTRN	protein_coding	INTRON=34/74,STRAND=-1	0	3	1	4
sv_00381	1	20849602	20849891	289	DEL	TCGTGATTACCATTTTATTTTATTTTTTTTTTTTTTTGGTCTTTTTGCTATTTCTTGGGCCGCTCCCGCGGCATATGGAGGTTCCCAGGCTAGAGGTCCAATCGGAGCCATAGCTAGCCACCGGCCTACGCCAGAGCCACAGCAACGCGGGATCCGAGCCGCGTCTGCAACCTACACCACAGTTCACGGCAACACCGGATCGTTAACCCACTGAGCAAGGGCAGGGACCGAACCCGCAACCTCATGGTTCCTAGTCGGATTCGTTAACCACTGCGCCACGACGGGAACTC	T	14	WXP1,WXP2,WXP3,WXP4,WXP5,WXP6,WXP7,XP1,XP2,XP3,XP4,XP5,XP6,XP7,DU1,DU5,DU7	ENSSSCG00000004123	ENSSSCT00000061166.2	intron_variant,feature_truncation	MODIFIER	UTRN	protein_coding	INTRON=27/74,STRAND=-1	7	7	3	17
sv_00382	1	20887905	20888197	292	DEL	TCAGGAAGGTTTTTTTTTTTTTTTTTTTTTGTCTTTTGTTGTTGTTGTTGTTGCTATCTCTTGGGCCGCTCCCGCGGCATATGGAGGTTCCCAGGCTAGGGGTCGAATTGGAGCTGTAGCCACCGGCCTACGCCAGAGCCATAGCAACGCGGGATCCGAGCCGCGTCTGCAACCTACACCACAGCTCACGGCAACGCCGGATCGTTAACCCACTGAGCAAGGGCAGGGACCGAACCCGCAACCTCATGGTTCCTAGTCAGATTCGTTAACCACTGCGCCACGACGGGAACTCC	T	4	XP6,DU5	ENSSSCG00000004123	ENSSSCT00000061166.2	intron_variant,feature_truncation	MODIFIER	UTRN	protein_coding	INTRON=16/74,STRAND=-1	0	1	1	2
sv_00383	1	20893199	20893300	101	DEL	ATTCTGTTTTGATGGTTGCTTTTCTGGAAAGATGGAGATGGGCAAAAGGCCACCACTCAGACTGGAAAACTTAAAGTGGCAGCTTTGCACCAAAGGTTCATT	A	7	XP3,LW5,DU4,DU5,DU6	ENSSSCG00000004123	ENSSSCT00000061166.2	intron_variant,feature_truncation	MODIFIER	UTRN	protein_coding	INTRON=14/74,STRAND=-1	0	1	4	5
sv_00384	1	20905423	20905495	72	DEL	CCAGCCAGCAGACTGGTGTCTTTACTTTCCCATTACTGCAGATGCCTACCTTCACCATCCACTTCTCACACAG	C	10	XP4,DU1	ENSSSCG00000004123	ENSSSCT00000061166.2	intron_variant,feature_truncation	MODIFIER	UTRN	protein_coding	INTRON=9/74,STRAND=-1	0	1	1	2
sv_00385	1	20974253	20974567	314	DEL	AATATTGTAAACAGGAGTTCCCGTCGTGGCGCAGTGGTTAACGAATCCGACTAGGAACCATGAGGTTGCGGGTTCGGTCCCTGCCCTTGCTCAGTGGGTTAACGATCCGGATCCGGCGTTGCCGTGAGCTATGATGTAGGTTGCAGATGCGGCTCGGATCCTGCGTTGCTGTGCCTCTGGCGTAGGCCAGTGGCTACAGCTCCGATTCAATCCCTAGCCTGGGAACCTCCATATGCCGCGGGAGCGGCCCAAGAAATAGCAACAACAACAACAACAACAACAAAAGACAAAAAGACAAAAAAGACAAAAAAAAAT	A	7	WXP5,LW7	ENSSSCG00000004123	ENSSSCT00000061166.2	intron_variant,feature_truncation	MODIFIER	UTRN	protein_coding	INTRON=2/74,STRAND=-1	1	0	1	2
sv_00386	1	21022387	21022709	322	DEL	CAAGAGTGAAGCTTTTGGAGTTCCCGTCGTGGCGCAGTGGTTAACGAATCCGACTAGGAACCATGAGGTTGCGGGTTCGGTCCCTGCCCTTGCTCAGTGGGTTAACGATCCGGCGTTGCCGTGAGCTGTGGTGTAGGTTGCAGACGCGGCTCGGATCCCGCGTTGCTGTGGCTCTGGCGTAGGCCGGTGGCTACAGCTCCGATTCAACCCCTAGCCTGGGAACCTCCATATGCCGCGGGAGCGGCCTAAGAAACAGCAACAACAACAACAACAACAAAAGACAAAAAAGACCAAAAAAAAAAAAAAAAAAAAAAAAAAAAAAA	C	11	WXP5,XP7	ENSSSCG00000004123	ENSSSCT00000061166.2	intron_variant,feature_truncation	MODIFIER	UTRN	protein_coding	INTRON=2/74,STRAND=-1	1	1	0	2
sv_00387	1	21040954	21041248	294	DEL	TAAAGAATAGTTTGAGGGGAGTTCCCGTCGTGGCGCAGTGGTTAACGAATCCGACTAGGAACCATGAGGTTGCGGGTTCGGTCCCTGCCCTTGCTCAGTGGGTTAACGATCCGGCGTTGCCGTGAGCTGTGGTGTAGGCTGCAGACGCGGCTCGGATCCCTCGTTGCCGTGGCTCTGGTGTAGGCCGGTGGCTACAGCTCCGATTCGACCCCTAGCCTGGGAACCTCCATATGCCGTGGGAGCGGCCCAAGAAATAGCAACAACAACAACAACAACAACAACAACAACAACAAAA	T	15	WXP3,WXP4,WXP5,WXP6,XP2,XP4,XP7,LW4,DU4,DU7	ENSSSCG00000004123	ENSSSCT00000061166.2	intron_variant,feature_truncation	MODIFIER	UTRN	protein_coding	INTRON=2/74,STRAND=-1	4	3	3	10
sv_00388	1	21050365	21050549	184	DEL	GTAAATAGGTAAGAATAGGAGTTCCCTTCATGGCGCAGTGGTTAAAGAATCCGACTAGGAACCATGAGGTTGCGGGTTCGGTCGCTCAGTGGGTTAATGATCCGGCGTTGCCGTGAGCTGTGGTGTAGGTTGCAGACGCGGCTCGGATCCCGCGTTGCAACAACAACAAAAAAGACAAAAATAAA	G	13	WXP1,WXP2,WXP5,WXP6,WXP7,XP3,XP4,XP5,XP6,XP7,DU7	ENSSSCG00000004123	ENSSSCT00000061166.2	upstream_gene_variant	MODIFIER	UTRN	protein_coding	DISTANCE=1578,STRAND=-1	5	5	1	11
sv_00389	1	21108874	21109185	311	DEL	TTAAATGTATTGGCCAGGAGTTCCCATCGTGGCGCAGTGGTTAACGAATCCGACTAGGAACCATGAGGTTGCGGGTTCGGTCCCTGCCCTTGCTCAGTGGGTTAACGATCCGGCGTTGCCGTGAGCTGTAGTGTAGGTTGCAGACGCGGCTCGGATCCTGCGTTGCTGTGGCTCTGGCGTAGGCCGGCGGCTACAGCTCCGATTCGACCCCTAGCCTGGGAACCTCCATATGCCGCGGAAGCGGTCCAAGAAATAGCAAAAAAAAAAAAAAAAAAAAAAAAAAAAAAAAAAAAAAAAAA	T	13	WXP2,WXP4,WXP5,WXP6,WXP7,XP1,XP5,XP6,LW4,LW7,LA7,DU1,DU4,DU5,DU6,DU7	ENSSSCG00000048547	ENSSSCT00000074124.1	intron_variant,non_coding_transcript_variant,feature_truncation	MODIFIER	-	lncRNA	INTRON=2/2,STRAND=-1	5	3	8	16
sv_00390	1	21184866	21185623	757	DUP:TANDEM	TTTGACTTTGCTGAGCTGCTTGCTTTGTTATGTTAGTACGTGGATGACGTATTAACCCATTGTACACTTTCACCTTTAGAAGAGTCGAACTGCATCTCAGTGCCTGACCATGAGTTATTGTGGCTCAGAACACTTAAGAAAGTTGACTACAGGCGGAAAATTTATGAGTGGCAAAGTGAGAACATGGCAGATTTCCATAAATCACTTTTATTGAGAGTTGAGTCACTCTTTGCTATGAAAATAATTTATAGGGCAATGTTCCATTTGAGGGAAAATGAAAATTAATGGCATTTGTCAAGATGCTGATGAATATGTTTCAACACCAGTGGAAAAGAACAAGTTTCACAGAAAATGTAAACTCTATACCAGATTATTTATCATTATAATTATTTCAGGCTC…	TTTGACTTTGCTGAGCTGCTTGCTTTGTTATGTTAGTACGTGGATGACGTATTAACCCATTGTACACTTTCACCTTTAGAAGAGTCGAACTGCATCTCAGTGCCTGACCATGAGTTATTGTGGCTCAGAACACTTAAGAAAGTTGACTACAGGCGGAAAATTTATGAGTGGCAAAGTGAGAACATGGCAGATTTCCATAAATCACTTTTATTGAGAGTTGAGTCACTCTTTGCTATGAAAATAATTTATAGGGCAATGTTCCATTTGAGGGAAAATGAAAATTAATGGCATTTGTCAAGATGCTGATGAATATGTTTCAACACCAGTGGAAAAGAACAAGTTTCACAGAAAATGTAAACTCTATACCAGATTATTTATCATTATAATTATTTCAGGCTC…	16	XP3,XP6,LW4,LW6,DU5,DU7	-	-	intergenic_variant	MODIFIER	-	-	-	0	2	4	6
sv_00391	1	21185054	21185634	580	DEL	AGATTTCCATAAATCACTTTTATTGAGAGTTGAGTCACTCTTTGCTATGAAAATAATTTATAGGGCAATGTTCCATTTGAGGGAAAATGAAAATTAATGGCATTTGTCAAGATGCTGATGAATATGTTTCAACACCAGTGGAAAAGAACAAGTTTCACAGAAAATGTAAACTCTATACCAGATTATTTATCATTATAATTATTTCAGGCTCTTTGGTAAAACATTAGGAAGTTTGGCTGAATTAGATATGATTCAGTCACTGATCTGAGTGTCCTTTCAGATCCATTTTCAGCCTTTCTGTCTGATGCTCTGAGCCCCAGATGTTCCAAAGGCAGACTGACACTGAGTCAGAGAACTTCTTCTCCACTCCCCTCTGGGGACACCCAGGTCCTGGCAGTA…	A	5	XP3,XP6	-	-	intergenic_variant	MODIFIER	-	-	-	0	2	0	2
sv_00392	1	21199605	21199912	307	DEL	GTTTTCTGCCTTTTTTTTTTTTTTTTTTTTGGTCTTTTGTCTTTTTGTTGTTGTTGTTGTTGTTGTTGCTATTTCTTGGGTCGCTCCCGCGGCATATGGAGGTTCCCAGGCTAGGGGTTGAATCGGAGCTGTAGCCACCGGCCTACGCCAGAGCCACAGCAACGCCAGATCCGAGCCGCGTCTGCAACCTACACCACAGCTCACGGCAACGCCGGATCGTTAACCCACTGAGCAAGGGCAGGGGCCAAACCCACAACCTCATGGTTCCTAGTCGGATTCATTAACCACTGCACCACGACGGGAACTCC	G	24	WXP6,WXP7,XP2,XP3,XP4,XP6,LW4,DU1,DU2,DU7	-	-	intergenic_variant	MODIFIER	-	-	-	2	4	4	10
sv_00393	1	21200338	21200407	69	DEL	TTGTATTTTTATTTATTTATTTATTTATTTATTTATTTATTTTCCCACTGTATTTTTTTTTCCCACTGTA	T	12	WXP2,WXP3,WXP4,WXP6,XP3,XP4,XP7,LW7,DU5	-	-	intergenic_variant	MODIFIER	-	-	-	4	3	2	9
sv_00394	1	21221446	21221782	336	DEL	AAGCAGCAGCTTTTTTTTTTTTTTTTTTTTTTTTTTTTTTTTTTTTTTTTTTTTTTTTTTCTTTTGTCTTTTGTCCTTTTGTTGTTGTTGTTGTTGCTATTTCTTGGGCCGCTCCCGCGGCATATGGAGGTTCCCAGGCTAGGGGTCAAATCGGAGCTGTAGCCACTGGCCTACGCCAGAGCCACAGCAACACGGGATCCGAGCCGCGTCTGCAACCTACACCACAGCTCACGGCAACGCCGGATCGTTAACCCACTGAGCAAGGGCAGGGACCGAACCCGCAACCTCATGGTTCCTAGTCGGATTCGTTAACCACTGCGCCACGACGGGAACTCCC	A	22	WXP3,WXP6,WXP7,XP1,XP3,XP4,XP5,XP6,LW5,LW6,LW7,LA5,LA6,LA7,DU4,DU6	-	-	intergenic_variant	MODIFIER	-	-	-	3	5	8	16
sv_00395	1	21250018	21250313	295	DEL	ATAGTCAGTTAATTTTTTTTTTTTTTTTGTCTTTAGTTGTTGTTGTTGTTGTTGTTGCTATTTCTTGGGCCGCTCCCACGGCATATGGAGGTTCCCAGGCTAGGGGTCGAATCAGAGCTGTAGCCACCGGCCTACGCCAGAGGCACAGCAACGCAGGATCCGAGCCGCGTCTGCAACCTACACCACAGCTCACGGCAACGCCGGATCGTTAACCCACTGAGCAAGGGCAGGGACCGAACCGCAACCTCATGGTTCCTAGTCGGATTCGTTAACCACTGCGCCACGACGGGAACTCC	A	7	DU5,DU7	-	-	intergenic_variant	MODIFIER	-	-	-	0	0	2	2
sv_00396	1	21294862	21295008	146	DEL	AAGATTTTTATTTTGATTTCCCCCCCAACCATCTTAAAAAATGTGAAATTTATTCTCAGCCTGAGGACTGTACAAAAAAGACATTAGGGGTTCCCACTGTATCCCAGTGGGTTAAGAATCTGACTGTGGTGGCTTGGGTCACTGCAG	A	4	XP3,XP6	ENSSSCG00000049141	ENSSSCT00000067271.1	non_coding_transcript_exon_variant,feature_truncation	MODIFIER	-	lncRNA	EXON=1/2,STRAND=-1	0	2	0	2
sv_00397	1	21419421	21419644	223	DEL	GTGGCGCAGTGGTTAACGAATCCGACTAGGAACCATGAGGTTGAGGGTTCAATCCCTGGCCTTGCTCAGTGGGTTAAGGATCCGGCATTGCCATGAGCTGTGTGTAGGTTGCAGACACGGCTTGGATCCCGCATTGATGTGGCTCTGGTGTAGGCTGGCGGCTACAGCCCTGATTCAACCCCTAGCTTGGGAACCTCCATATGCCACAGGAGTGGCCCAAGAAA	G	12	WXP1,WXP7	ENSSSCG00000039614	ENSSSCT00000042139.2	upstream_gene_variant	MODIFIER	-	protein_coding	DISTANCE=2456,STRAND=1	2	0	0	2
sv_00398	1	21443634	21443711	77	DEL	AAAAATTGGAACATAGTTAAAGTCTATGACTGCATTGAAACATTATGAAATAGAGAAAACTTCCAGCAGGGCAAGTAG	A	6	LW4,DU1	ENSSSCG00000004132	ENSSSCT00000004567.4	downstream_gene_variant	MODIFIER	PHACTR2	protein_coding	DISTANCE=232,STRAND=-1	0	0	2	2
sv_00399	1	21623941	21624699	758	DEL	CACCAAGTGCAACTTTTTTTTTTTTTTTTTTTTTTTTTTTTTATTATTTTCCCACTGTACAGCAAGGGGGTCAGGTTATCCTTACATGTATACATTGCAGTTACAGTTTTTTCCCCCACCCTTTCTTCTGTTGCGACATGAGTATCTAGACATAGTTCTCAATGCTATTCAGCAGGATCTCCTTATAAATCTATTCTAGGTTGTGTCTGATAAGCCCAAGCTCCCGATCCCTCCCACTCCCTCCCCCTCCCATCAGGCAACCACAAGTCTCTTCTCCAAGTCCATGATTTTCTTTTCTGAGGAGATGTTCATTTGTGCTGGATATTAGATTCCAGTTATAAGTGATATCATATGGTATTTGTCTTTGTCTTTCTGGCTCATTTCACTCAGTATGAGATT…	C	22	WXP1,WXP3,WXP5,XP2,XP3,XP6,XP7,LW4	ENSSSCG00000004132	ENSSSCT00000037187.2	intron_variant,feature_truncation	MODIFIER	PHACTR2	protein_coding	INTRON=1/12,STRAND=-1	3	4	1	8
sv_00400	1	21664140	21664438	298	DEL	AAAAATCAGTTCTAGGGAGTTCCCGTCGTGGCGCAGTGGTTAACGAATCCGACTAGGAACCATGAGGTTGCGGGTTCGGTCCCTGCCCTTGCTCAGTGGGTTAACGATCCGGCGTTGCCGTGAGCTGTGGTGTAGGTTGCAGACGCAGCTCGGATCCCGCGTTGCTGTGGCTCTGGCGTAGGCTGGTGGCTACAGCTCCGATTCGACCCCTAGCCTGGGAACCTCCATATGCCGCGGGAGCGGCCCAAGAAATAGCAACAACAACAACAATAACAACAACAACAACAACAAAAAAAGAC	A	7	WXP6,XP6	ENSSSCG00000004132	ENSSSCT00000041834.2	intron_variant,feature_truncation	MODIFIER	PHACTR2	protein_coding	INTRON=1/10,STRAND=-1	1	1	0	2
sv_00401	1	21666800	21666927	127	DUP:TANDEM	GTTTCTCCCACATCATAATTTCTAGTCCTTATAGATAACATATTTCTATTGACAGTGTAGTAAATTAATATTACAGTACCAATTTATAACTAGAGAAATCTCTCTAATTCTAGTCAATGCCAGAACCC	GTTTCTCCCACATCATAATTTCTAGTCCTTATAGATAACATATTTCTATTGACAGTGTAGTAAATTAATATTACAGTACCAATTTATAACTAGAGAAATCTCTCTAATTCTAGTCAATGCCAGAACCCTTTCTCCCACATCATAATTTCTAGTCCTTATAGATAACATATTTCTATTGACAGTGTAGTAAATTAATATTACAGTACCAATTTATAACTAGAGAAATCTCTCTAATTCTAGTCAATGCCAGAACCC	6	XP2,XP6,XP7	ENSSSCG00000004132	ENSSSCT00000041834.2	intron_variant	MODIFIER	PHACTR2	protein_coding	INTRON=1/10,STRAND=-1	0	3	0	3
sv_00402	1	21690924	21691234	310	DEL	TAAGAGTAATTGTTGAGGAGTTCCCGTCGTGGCGCAGTGGTTAACGAATCCGACTAGGAACTATGAGGTTGCGGGTTCGGTCCCTGCCCTTGCTCAGTGGGTTAACGATCCGGCGTTGCCGTGAGCTGTGGTGTAGGTTGCAGACGCGGCTCGGATCCTGCGTTGCTGTGGCTCTGGCGTAGGCCGGTGGCTACAGCTCCGATTCAACCCCTAGCCTGGGAACCTCCATATGCCGCGGGAGCGGCCCAAGAAATAGCAACAACAACAACAACAACAACAAAAAGACAAAAGACAAAAAAAAAAAAAAAAAA	T	14	WXP2,WXP3,WXP4,WXP5,WXP6,WXP7,XP1,XP4,XP5,XP7,DU1	ENSSSCG00000004132	ENSSSCT00000041834.2	intron_variant,feature_truncation	MODIFIER	PHACTR2	protein_coding	INTRON=1/10,STRAND=-1	6	4	1	11
sv_00403	1	21800132	21800197	65	DEL	TGGCTCCCTCTTTTTTTTTTTTTTTTTTTTTTTTGGTCTTTTTGCCATTTCTTGGGCCACTCCCGC	T	16	WXP1,WXP2,WXP7,XP2,XP3,XP5,XP6	ENSSSCG00000004134	ENSSSCT00000004569.4	intron_variant,feature_truncation	MODIFIER	PEX3	protein_coding	INTRON=1/12,STRAND=-1	3	4	0	7
sv_00404	1	21838081	21838251	170	DEL	AGGAGCCACGTTGTCTTTTTCATCTTGCACACAACTCCAGTGTCTAACTTGATGCATAGCCAATCGTTCACACTTGGGATGTGTTTATGGAATTAGTGAATGGCCCTAAACTGTGACATAGAATCATAAAGATGATCTCAGATAGTTATTCATATCTTTTTGTTTATTGAT	A	5	WXP3,WXP5,XP6	ENSSSCG00000048780	ENSSSCT00000078396.1	intron_variant,non_coding_transcript_variant,feature_truncation	MODIFIER	-	lncRNA	INTRON=1/2,STRAND=1	2	1	0	3
sv_00405	1	21993471	21993547	76	DEL	TTGCTTATTCATTTTATTTTTTTTTTCTGTTTTATTTCACTTTATTTTTTTTTCTTTTTTTTTATTTTCCCACTGTA	T	11	WXP2,WXP4,WXP7,XP1,XP6,LW4,DU1,DU6,DU7	ENSSSCG00000004136	ENSSSCT00000004571.4	intron_variant,feature_truncation	MODIFIER	AIG1	protein_coding	INTRON=3/6,STRAND=-1	3	2	4	9
sv_00406	1	22013695	22013950	255	DEL	TTATATTGGAAACATTTTTTTTTTTGCTATTTCTTTGGGCCGCTCCCGCGCATATGGAGGTTCCAGGCTAGGGTCCAATCGGAGCTGTAGCCACTGCCTACGCAGAGCCACAGCAACGCGGATCCGAGCCGCGTCTGCACCTACACCACAGCTCACGCAACGCCGGATCGTTAACCACTGAGCAAGGCAGGATCGAACCCGCAACCTCATGGTTCCTAGTCGGATTCGTTAACCACTGCGCCATGACGGGAACTCC	T	8	WXP2,WXP6,XP1,XP3,XP4,XP6,LW6,LW7	ENSSSCG00000004136	ENSSSCT00000004571.4	intron_variant,feature_truncation	MODIFIER	AIG1	protein_coding	INTRON=3/6,STRAND=-1	2	4	2	8
sv_00407	1	22075128	22075417	289	DEL	TATAAAGGACATGATAGGAGTTCCCGTCGTGGCGCAGTGGTTAACGAATCCGACTAGGAACCATGAGGTTGTGGGTTCGATCCCTGCCCTTGCTCAGTGGGTTAACGATCCGGCGTTGCCGTGAGCTGTGGTGTAGGCTGCAGACACGGCTCGGATCCTGCGTTGCTATGGCTCTGGCGTAGGCCGGTGGCTATGGCTCCGATTCGACCCCTAGCCTGGGAACCTCCATATGCCGCGGGAGCGGCCCAAGAAATAGCAAAAAAAAAAGACAAAAAAAATAAAAAATAAAA	T	9	WXP7,XP1,XP6,XP7,LA5	ENSSSCG00000004136	ENSSSCT00000004571.4	intron_variant,feature_truncation	MODIFIER	AIG1	protein_coding	INTRON=2/6,STRAND=-1	1	3	1	5
sv_00408	1	22096661	22096959	298	DEL	TAGAAATGAGGAGTTCCCGTCGTGGCGCAGTGGTCAACAAATCCGACTAGGAACCATGAGGTTGCGGGTTCGGTCCCTGCCCTTGCTCAGTGGGTTAACGATCCGGCATTGCCGTGAGCTGTGGTGTAGGTTGCAGACGCGGCTCGGATCCCGCGTTGCTGTGGCTCTGGCGTAGGCCGGTGGCTACAGCTCCGATTCAACCCCTAGCCTGGGAACCTCCATATGCCACGGGAGCAGCCCAAGAAATAGCAACAACAACAAAAGACAAAAGACCAAAAAAAAAAAAAAAAAAAGAAAAA	T	9	XP2,XP3,XP6,LW6	ENSSSCG00000004136	ENSSSCT00000004571.4	intron_variant,feature_truncation	MODIFIER	AIG1	protein_coding	INTRON=1/6,STRAND=-1	0	3	1	4
sv_00409	1	22222530	22222797	267	DEL	CAAAAACAGCCAGTCGCAGTGGTTAACAAATCCGACTAGGAACCATGAGGTTGCGGGTTCGGTCCCTGCCCTTGCTCAGTGGGTTGACGATCCGGCGTTGCCGTGGGCTGTGGTGTAGGTTGCAGACGCGGCTCGGATCCCGTGTTGCTGTGGCTCTGGCGTAGGCCGTAGGCTACAGCTCCGATTCGACCCCTAGCCTGGGAACCTCCATATGCCGTGAGAGTGGCCCAAAGAAATGGCAAAAAGACAAAAAAAAAAAAAACAAAAA	C	19	WXP3,WXP5,WXP6,XP1,XP2,XP3,XP6,XP7,LW5,LW6,LW7,LA6,LA7,DU2,DU4,DU5,DU6	ENSSSCG00000043315	ENSSSCT00000090008.1	intron_variant,non_coding_transcript_variant,feature_truncation	MODIFIER	-	lncRNA	INTRON=3/3,STRAND=-1	3	5	9	17
sv_00410	1	22380579	22380579	50	INS	T	TCAGTGGGTGAAGGATCCAGTGTTACTGTGAACTGTGGTGTAGGTTGCAGA	8	WXP2,WXP6,LW6,LW7	ENSSSCG00000004138	ENSSSCT00000056296.2	intron_variant,feature_elongation	MODIFIER	HIVEP2	protein_coding	INTRON=4/11,STRAND=1	2	0	2	4
sv_00411	1	22473590	22473878	288	DEL	TCTTGTTCAGTATTTTATCTTTTTGTCTTTTTTTTTGTTGTTGTTGTTGCTATTTCTTGGGCCGCTCCCGCGGCATATGGGGGTTCCCAGGCTAGGGGTTGAATCGGAGCTGTAGCCTCTGGCCTATGCCAGAGCCACAGCAACGCGGGATCTGAGCCGCGTCTGCAACCTACACCACAGCACACAGCAACGCCGGATCGTTAACCCACTGAGCAAGGGCAGGGACTGAACCCGCAACCTCATGGTTCTTAGTCGGATTCGTTAACCACTGCGCCACGATGGGAACTCC	T	6	WXP5,XP1,XP3,LA4,LA5	-	-	intergenic_variant	MODIFIER	-	-	-	1	2	2	5
sv_00412	1	22536808	22537116	308	DEL	CAAGAAAGCAGCTTAGGAGTTCCCGTCGTGGCGCAGTGGTTAACGAAACGAATCCGACTAGGAACCATGAGGTTGCGGGTTCGGTCCCTGCCCTTGCTCAGTGGGTTAACGATCTGGCGTTGCCGTGAGCTGTGGTGTAGGTTGCAGACGCGGCTCGGATCCCGCGTTGCTGTGGCTCTGGCGTAGGCCGGTGGCTATAGCTCCGATTAGACCCCTAGCCTGGGAACCTCCATATGCCACGGGAGCGGCCCAAGAAATAGCAACAACAACAACAAAAAGACAAAAGACAAAAGACAAAAAAAAAAAAAA	C	14	WXP5,XP1,XP3,XP4,XP6,XP7,DU1	-	-	intergenic_variant	MODIFIER	-	-	-	1	5	1	7
sv_00413	1	22550419	22550709	290	DEL	TAAAAAATGGTATGTGGAGTTCCCGTCGTGGCGCAGTGGTTAACGAATCCGACTAGGAACCATGAGGTTGCAGGTTCGGTCCCTGCCCTTGCTCAGTGGGTTAACGATCCGGCGTTGCCGTGAGCTGTGGTGTAGGTTGCAGATGCGGCTCGGATCCCGTGTTGCTGTGGCTCTGGCGTAGGCCGGTGGCTACAGCTCCGATTGGACCCCTAGCCTGGGAACCTCCATATGCCGCGGGAGCGGCCCAAGAAATAGCAACAACAACAACAAAAGACAAAAAGACAAAAAAAA	T	10	WXP4,WXP5,XP4,XP6,XP7,LA4,DU6	-	-	intergenic_variant	MODIFIER	-	-	-	2	3	2	7
sv_00414	1	22576208	22576509	301	DEL	TAAGATAGTAAATCTGGAGTTCCCGTCGTGGCGCAGTGGTTAACGAATCCGACTAGGAACCATGAGGTTGCGGGTTCGGTCCCTGCCCTTGCTCAGTGGGTTAACGATCCGGCGTTGCCGTGAGCTGTGGTGTAGGTTGCAGACGCGGCTCGGATCCCGCGTTGCTGTGGCTCTGGCGTAGGCCAGTGGCTACAGCTCCGATTCAACCCCTAGCCTGGGAACCTCCATATGCCACGGGAGCGGCCCAAGAAATAGCAACAACAACAACAACAACAAAAGACAAAAAGACAAAAAAAAAAAAA	T	12	WXP1,WXP5,WXP6,XP1,XP2,XP3,XP4,XP5,XP6,XP7,LW5,LW7,LA4,DU1,DU4,DU6,DU7	-	-	intergenic_variant	MODIFIER	-	-	-	3	7	7	17
sv_00415	1	22744376	22744696	320	DEL	ATTTTATTTTATTATTATTATTTTTTTTTTGTCTTTTGTCTTTTGTTGTTGTTGTTGTTGTTGTTGCTATTTCTTGGGCCGCTCCTGCGGCATATGGAGATTCCCAGGCTAGGGGTTGAATCGGAGCTGTAGCCACTGGCCTACGCCAGAGCCACAGCAACGCGGGATCCGAGCCGCGTCTGCAACCTACACCACAGCTCACGGCAACACCGGATCGTTAACCCACTGAGCAAGGGCAGGGACCGAACCCGCAACCTCATGGTTCCTAGTCGGATTCGTTAACCACTGCGCCACGATGGGAACTCCAGCTGTTGAATTTTT	A	10	WXP2,WXP6,WXP7,XP1,XP2,XP3,XP6,XP7,LW5,LW7,DU1,DU4	ENSSSCG00000004139	ENSSSCT00000004574.4	intron_variant,feature_truncation	MODIFIER	ADGRG6	protein_coding	INTRON=2/23,STRAND=-1	3	5	4	12
sv_00416	1	22774278	22774557	279	DEL	CAAGACTTATTTTGGGAGTTCCCGTCGTGGCGCAGTGATTAACGAATCTGACCAGGAACCATGAGGTTGCCGGTTCGGTCCCTGCCCTTGCTCAGTGGGTTAAGGATCCGGTGTTGCCGTGAGCTGTGGTGTAGGTTGCAGACGCGGCTCAGATCTGGTGTTGCTGTGGCTGTGGTGTAGGCCAGTGGCTACAGCTCCAATTCGACCCCTAGCCTGGGAACCTCCATATGCCACAGGAGCGGCCCAAAGAAATAGCAAAAAGACAAAAAAAAAAAAAAAA	C	9	WXP1,WXP3,WXP4,XP1,XP2,XP3,XP4,XP6,XP7,LW5,DU2,DU6	ENSSSCG00000004139	ENSSSCT00000004574.4	intron_variant,feature_truncation	MODIFIER	ADGRG6	protein_coding	INTRON=2/23,STRAND=-1	3	6	3	12
sv_00417	1	22783299	22783592	293	DEL	TCAGCATACATTTTTTTTTTTTTTTGTCTTTTTGTCTTTTGTTGTTGTTGTTGCTATTTCTTGGGCCGCTCCCGCGGCATATGGAGGTTCCCAGGCTAGGGGTTGAATCGGAGCTGCACCCACCGGCCTACACCAGAGCCACAGCAACACGGGATCCGAGCCGCGTCTGCAACCTACACCACAGCTCACGGCAACGCCGGATCGTTAACCCACTGAGCAAGGGCAGGGACCGAACCCGCAACCTCATGGTTCCTAGTCGGATTCGTTAACCACTGCACCACGACGGGAACTCCC	T	17	WXP4,WXP5,WXP6,WXP7,XP1,XP2,XP3,XP4,XP5,XP6,XP7,LW6,LW7,DU1,DU4,DU6	ENSSSCG00000004139	ENSSSCT00000004574.4	intron_variant,feature_truncation	MODIFIER	ADGRG6	protein_coding	INTRON=2/23,STRAND=-1	4	7	5	16
sv_00418	1	22838692	22838764	72	DEL	CTGTCTCTCTTTCTTTTTTTTTTTTATTTTCTTTTATTTTCTTATTTTTATTTTCCCACTGTACAGCAAGGGT	C	12	WXP1,WXP2,WXP3,WXP7,XP5,XP7,LW5,LW6,LW7,DU1,DU2,DU4,DU7	-	-	intergenic_variant	MODIFIER	-	-	-	4	2	7	13
sv_00419	1	22846686	22849342	2656	DEL	GAGAATCTGGGTAGAAGGAAACAACTGGATCCTTGAGTTTAGTTAAAGTCATAATATTTTATTTATTTAATTTTTAAACATTTTATTGGAGTAGAGTTGACTTAATGTTGCATTAGTTTTAGGTGTACAGCAAAGTGAATCAGTTATACATATAAATATATCCATTCTTTTTTCCCATATAGGTTATTATAGACTATTGAGTACATTGCCCTGTGCTATAGGGTAGGTCCTTGTAAATTATCTATTTTACATGCAGTGGTGTGTATATGTTATTCCCATTCTCCTAATTTATCTCTCCCAACCATGATTTCCCCTATGGTAATCCTAAGTTTGATTTTGAAATCCTTGAGTTTGTTTCTGCTTTATAAATAACTTCTTTTTTTATAATTTTTATTATAC…	G	10	XP3,XP6	-	-	intergenic_variant	MODIFIER	-	-	-	0	2	0	2
sv_00420	1	22900405	22900707	302	DEL	TTGTAGAGGCAATTTATTTTTTTTTTTTTTTTTTTTTTTTTTTTTTTTTTTTTGTCTTTTTGCCATTTCTTGGGCCGCTCCTGCGGCATATGGAGGTTCCCGGGCTAGAGGTCGAATCGGAGCTGTAGCTGCCAGCCTACGCCAGAGCCACAGCAACGCAGGATCCGAGCCGCGTCTGTGACCTACACCACAGCTCACGGCAACGCCGGAACCTTGACCCACTGAGCAAGGGCAGGGATCGAACCCGCAGCCTCATGGTTCCTAGTCGGATTCGTTAACCACTGCGCCACGACGGGAACTCCG	T	13	WXP1,WXP2,WXP4,WXP6,WXP7,XP1,XP2,XP3,XP4,XP5,XP6,XP7,LW5,LW7,LA5,LA6,DU1,DU4,DU5,DU6,DU7	ENSSSCG00000004140	ENSSSCT00000004575.4	intron_variant,feature_truncation	MODIFIER	VTA1	protein_coding	INTRON=2/6,STRAND=-1	5	7	9	21
sv_00421	1	22987115	22987239	124	DUP:TANDEM	CTTTATAAGACAGTAAATATAGTAGGTGAATTTTATGAAAAAAAAGAAAATATTTTTAATTTTATTTTAAGGTAACCTAACATAGTGCTGTTTACAGAATTGATAGTTATGTCAGATGCATTTGA	CTTTATAAGACAGTAAATATAGTAGGTGAATTTTATGAAAAAAAAGAAAATATTTTTAATTTTATTTTAAGGTAACCTAACATAGTGCTGTTTACAGAATTGATAGTTATGTCAGATGCATTTGATTTATAAGACAGTAAATATAGTAGGTGAATTTTATGAAAAAAAAGAAAATATTTTTAATTTTATTTTAAGGTAACCTAACATAGTGCTGTTTACAGAATTGATAGTTATGTCAGATGCATTTGA	4	DU2,DU6	ENSSSCG00000036250	ENSSSCT00000042834.2	intron_variant	MODIFIER	NMBR	protein_coding	INTRON=2/2,STRAND=1	0	0	2	2
sv_00422	1	23021026	23021327	301	DEL	TAAAAAAGAATTTAAGGAGTTCCCGTCGTGGCGCAGTGGTTAACGAATCCGACTAGGAACCATGAGGTTGCGGGTTCGGTCCCTGCCCTTGCTCAGTGGGTTAACGATCCGGCGTTGCCGTGAGCTGTGGTGTAGGTTGCAGACGTGGCTCGGATCCCGCGTTGCTGTGGCTCTGGCGTAGGCCGGTGGCTACAGCTACGATTGGACCCCTAGCCTGGGAACCTCCATATGCCGCGGGAGTGGCCCAAGAAATAGCAACAACAACAAAAAAAAGACAAAAGACAAAAAAAAAAAAAAAAAAA	T	12	WXP6,XP3,XP6,LA4	-	-	intergenic_variant	MODIFIER	-	-	-	1	2	1	4
sv_00423	1	23084267	23084562	295	DEL	TTAATTACCCTTTTCTTTTTTTTTTTTTTTTTTTTTGTCTTTTGTTATTGTTGTTGCTATTTCTTGGGCCGCTCCCGCGGCATATGGAGGTTCCCAGGCTAGGGGTCCAATCAGAACTGTAGCCACCGGCCTACGCCAGAGCCACAGCAATGCAGGATCCGAGCCGCGTCTGCAACCTACACCACAGCTCACAGCAACGCCAGATCGTTAACCCACTGAGCAAAGCCAGGGACCAAACCCGCAACCTCATGGTTCCTAGTCGGATTCGTTAACCACTGCGCCACGACAGGAACTCC	T	9	WXP6,WXP7,XP1,XP2,XP3,XP5,DU4,DU5	-	-	intergenic_variant	MODIFIER	-	-	-	2	4	2	8
sv_00424	1	23445006	23445282	276	DEL	CAAAAATACAATGGTTGCCTGATGGGAGGGGGAGGGAGTGGGAGGGATCGGGAGCTTGGGCTTATCAGACACAACCTAGAATAGATTTATAAGGAGATCCTGCTGAATAGCATTGAGAACTATGTCTAGATACTCATGTCGCAACAGAAGAAAGGGTGGGGGAAAAAACTGTAACTGCAATGTATACATCTAAGGATGACCTGACCCCCTTGCTGTACAGTGGGAAAATAATAAAAAAAAAAAAAAAAAAAAAATCTAAGGGGAAATAAATGAAAAA	C	19	WXP1,WXP2,WXP3,WXP4,WXP5,WXP6,XP1,XP2,XP3,XP4,XP5,XP6,XP7,LW5,LW7,DU2	-	-	intergenic_variant	MODIFIER	-	-	-	6	7	3	16
sv_00425	1	23510927	23511254	327	DEL	TAAAAGTTCTGTATGGAGTTCCCGTCGTGGCGCAGTGGTTAACGAATCCGACTAGGAACCATGAGGTTGCGGGTTCGGTCCCTGCCCTTGCTCAGTGGGTTAACGATCCGGCGTTGCGGTGAGCTGTGGTGTCGGCTGCAGACGTGGCTCGGATCCCGCGTGGCTGTGGCTCTGGTGTAGGCCGGTGGCTACAGCTCCGATTCGACCCCTAGCCTGGGAACCTCCATATGCCGTGGGAGCGGCCCAAGAAATAGCAACAACAACAACAACAACAACAAAAAAAACAAAACAAAACAAAACAAAACAAAACAAACAAACAAACAAACAA	T	18	WXP2,WXP3,WXP4,WXP6,WXP7,XP1,XP2,XP3,XP5,XP6,XP7,DU1,DU6,DU7	-	-	intergenic_variant	MODIFIER	-	-	-	5	6	3	14
sv_00426	1	23526052	23526393	341	DEL	TAAGAAATTTCTAAATCCTGGAGTTCCCATCGTGGCGCAGTGGTTAACGAATCTGACTAGGAACCATGAGGTTGCGGGTTCGGTCCCTGCCCTTGCTCAGTGGGTTAACGATCCAGCGTTGCTGTGAGCTGTGGTGTAGGTCGCAGACGCGGCTCGGATCCTGCATTGCTGTGGCTCTGGCGTAGGCCGGTGGCTACAGCTCCGATTCAACCCCTAGCCTGGGAACCTCCATATGCCACGGGAGCGGCCCAAAGAAATAGCAAAAAGACAAAACAAAACAAAAACCTGGGGATTGCAAATTGTCAAAGAACTGTGGTGGAAACTAATTAGAAAAAAAAAAAA	T	11	WXP3,WXP4,WXP6,WXP7,XP3,XP5,XP6,LW7	-	-	intergenic_variant	MODIFIER	-	-	-	4	3	1	8
sv_00427	1	23763403	23763674	271	DEL	TCTGCTTTGCCTTCCTTTTTCTTTTTTTTTGCTATTTCTTTGGGCTGCTCCCGTGGCATATGGAGGTTCCCAGGCTAGGGGTCGAATCGGAGCTGTAGCCACCAGCCTGCGCCAGAGCCACAGCAACGCAGGATCCGAGTCGTGTCTGCAACCTACACCACAGCTCACGGCAACGCCGGATCGTTAACTCACTGAGCAAGGGCAGGGACCGAACCCGCAACCTCATGGTTCCTAGTCGGATTCGTTAACCACTGCGCCACGACGGGAACTCC	T	15	WXP1,WXP2,WXP3,WXP6,WXP7,XP2,XP7,LW6	-	-	intergenic_variant	MODIFIER	-	-	-	5	2	1	8
sv_00428	1	23809242	23809409	167	DEL	TTTACTTTTTGAATTTTTTTTTTTTTTTAAATTTTATTTTTTTATTTTCCCACTGTACAGCAAGGGAGTGGGAGGGATCGGGAGCTTGGGCTTATCAGTCACAACCTAGAATAGATTTACAAGGAGATCCCGCTGAATAGCATTGAGAACTATGTCTAGATACTCATG	T	12	WXP2,WXP3,WXP4,WXP6,WXP7,XP1,XP2,XP3,XP4,XP5,XP6,XP7,LW5,LW7,LA4,LA5,DU1,DU2,DU4	-	-	intergenic_variant	MODIFIER	-	-	-	5	7	7	19
sv_00429	1	23823099	23823397	298	DEL	ACAACACTGGATTCTTTTTTTTTTTTTTTTTTTTTTTTTTTTTTTTTTTTGGTCTTTTTGCTATTTCTTGGGCCGCTCCCGCGGCATATGGAGATTCCCAGGCTAGGGGTCCAATCGGAGCTGTAGCCACCAGCCTACGCCAGAGCCACAGCAACGCGAGATCCGAGCCACGTCTGCAACCTACACCACAGCTCACAGCAACGCCGGATCATTAACCCACTGAGCAAGGGCAGGGACCGAACCCGCAACCTCATGGTTCCTAGTCAGATTCGTTAACCACTGCACCACGACGGGAACTC	A	5	WXP5,WXP6,XP1,XP2,XP4,XP6,LA4,DU1,DU4	-	-	intergenic_variant	MODIFIER	-	-	-	2	4	3	9
sv_00430	1	23994491	23994605	114	DEL	GTGTGTGTGTGCATGTGTGCATGTGCATAACTCCTTGTGTGTGTGTGTGTGTGTGTGTGTGCATGTGTGCATGTGCATAACTCCTTGTGTGTGTGTGTGTGTGTGTGTGTGCATC	G	8	WXP6,XP2,XP4,LW7	-	-	intergenic_variant	MODIFIER	-	-	-	1	2	1	4
sv_00431	1	24127956	24135544	7588	DEL	TTAAATATAATTGTAGGAGAGAGGACAAGATGGCGGAGGAGTAGGGGGACACGCTCGCCCTCTCCCACAAACACAACAAAAAAAGCACATCTACAGAAGAAATGACTCGCACAGAACAACAACCAATCGCTGGCAGAGGAACCTAAACTCCAATAACGGCAAGAAGTTCGTGACATTATTGGGCAGAACGGGAGAAAAGAGGAGAGTGAGAGAAGGTGAATCCGAGCGGGACGGGCGCTCGAAAGGGAACTGCGGAGGAGAAAGGGATCCCGCACCCTGGAAAGTCTCCTACCGGGCGAAAGATCAAACGAACCGGAGGAATCTCCAGATGCAGAGAAGAGTGTAGCAGTAAGTCGGAGTACGGAAAAACGGATCAAGAACCCAACGGACCATCTGAAC…	T	7	XP3,XP5,XP6,LW5	ENSSSCG00000043584	ENSSSCT00000069842.1	transcript_ablation	HIGH	-	protein_coding	STRAND=-1	0	3	1	4
sv_00432	1	24287351	24294697	7346	DEL	GAAAAAAACCCAAATAGAGAGAGGACAAGATGGCGGAGGAGTAGGGGGACACGCTCGCCCTCTCCCACAAACACAACAAAAAAAGCACATCTACAGAATAAATGACTCGCACAGAACAGCAACCAATTGCTGGCAGAGGAACCTAAACTCCAATAACGGCAAGAAGTTCGTGACATTACTGGGCAGAACGGGAGAAAAGAGGAGAGTGAGAGAAGGTGAATCCCAGCGGGACGGGCGCTCCCAAAAGGGAACTGCGGAGGAGGAGAAAGGGATCCCGCACCCTGGAAAGTCACCTACCGGGGGAAAGATCAAACGAACCGGAGGAATCTCCAGATGCAGAGAAGAGTGTAGCAGTAAGTTGGAGTACGGAAAAGCCGATCAAGAACCCAATGGACCATC…	G	4	XP3,XP6	-	-	intergenic_variant	MODIFIER	-	-	-	0	2	0	2
sv_00433	1	25187296	25187567	271	DEL	CAGACCTCGGAGTTCCCGTCGTGGCGCAGTGGTTAACGAATCCGACTAGGAACCATGAGGTTGCGGGTTCGATCCCTGGCCTTGCTCAGTGGGTTAAGGTTCCGGCGTTGCCGTGAGCTGTGGTGTAGGTCGCAGACGTGGCTCGGATCCCGCGTTGCTGTGGCTCTGGCGTAGGCTGGTGTCAACAGCTCCGATTAGACCCCTAGCCTGGGAACCTCCATATGCCGCAGGAGCGGCCCACATGAAAGACAAAAAAAAAAAAAAAAAAAAAA	C	15	WXP2,WXP3,WXP5,WXP6,WXP7,XP1,XP2,XP3,XP5,XP6,XP7,LW1,LW2,LW3,LW4,LW7,LA1,LA2,LA5,LA6,LA7,DU1,DU2,DU4,DU6	-	-	intergenic_variant	MODIFIER	-	-	-	5	6	14	25
sv_00434	1	25230625	25230932	307	DEL	TAAAAAAAAAAAGTGTTTTTCAGGAGTTCCCGTCGTGGCGCAGTGGTTAACGAATCCGACTAGGAATCATGAGGTTGCGGGTTCGGTCCCTGCCCCTGCTCAGTGGGTTAACGATCCGGCGTTGCCGTTGCCGTGAGCTGTGGTGTAGGTTGCAGACGCTGTGGTGTAGGTTGCAGACGCGGCTCGGATCCCGCGTTGCTGTGGCTCTGGCGTAGGCCGGTGGCTACAGCTCCGATTCGACCCCTAGCCTGGGAACCTCCATATGCCGCGGGAGCGGCCCAAAGAAATAGCAAAAAGACAAAAAAAAA	T	19	WXP4,WXP5,WXP6,WXP7,XP2,XP3,XP4,XP6,LW5,LW7,LA4,DU1	ENSSSCG00000004143	ENSSSCT00000004578.4	intron_variant,feature_truncation	MODIFIER	TXLNB	protein_coding	INTRON=1/8,STRAND=1	4	4	4	12
sv_00435	1	25425753	25426069	316	DEL	TCCTCTTTTTCTATTTCTGTTCAATCTTTTTTTTTTTTTTTTTTTTGTCTTTTTGTCTTTTTGTTGTTGTTGTTGTTGCTATTTCTTGGGCCGCTCCCGCGGCACATGGAGGTTCCCAGGCTAGGGGTTGAATCGGAGCTGTAGCCACCGGCCTACGCCAGAGCCACAGCAACGCGGGATCCGAGCCGTGTCTGCAACCAACACCACAGCTCATGGCAATGCCGGATTGTTAACCCACTGAACAAGGGCAGGGATCGAACCCGCAACCTCATGGTTCCTAGTCGGATTTGTTAACCACTGCGCCACGACGGGAACTC	T	11	WXP6,WXP7,XP2,XP3,XP5,XP6,XP7,LW6,LA4,LA5	-	-	intergenic_variant	MODIFIER	-	-	-	2	5	3	10
sv_00436	1	25529168	25529791	623	DEL	ATAAGAATGTTTTTATAGGAATTCTCATCGTGGCTTAGCAGTCAACGAACCCAACTAGCATCCTTGAGAACCCAGGTTTATTCGATCCTTGGCCTTGCTCAGTAGGTTAAGGATCCAGCGTTGCTGTGAGCTGTGGTGTAGGTCACAGACGCGGCTCAGATCCCAAGTTGCTGTGGCTGTGGCATAGGCAGACGGCTACAGCTCCGATTGAACCCCTAGCCTGGAAATCTCCATATGCCATGGCTATGAGCCTAAAAAGACAAAAAAAGACAAGAATGGTTTTGTAAATGCTCTATTTACTAGTAGTTTTCTTTAAAAGGAAACAAGAACATGAGGGTTAAAAAAGTAGTATGTTTCTCTCACATTCTGAATGAATAAAAGGAAATCTAATATTAAATT…	A	14	LW2,LW4,LA3,LA6,LA7,DU4,DU5	ENSSSCG00000004146	ENSSSCT00000004582.5	intron_variant,feature_truncation	MODIFIER	REPS1	protein_coding	INTRON=8/19,STRAND=1	0	0	7	7
sv_00437	1	25594051	25594390	339	DEL	CAAGAATTTTAAGACATCAGGAGTTCCCGTCGTGGCGCAGTGGTTAACGAATCCGACTAGGAACCATGAGGTCGCGGGTTCGGTCCCTGCCCTTGCTCAGCGGGTTAACGATCCGGTGTTGCCATGAGCTGTGGTGTAGGTTGCAGACGCGGCTCGGATCCCGCGTTGCTGTGGTGTAGGTTGCAGACGCGGCTCGGATCCCACGTTGCTGTGGCTCTGGCGTAGGCCAGTGGCTACAGCTCCGATTCAACCCCTAGCCTGGGAACCTCCATATGCCGTGGAAGCGGCCCAAGAGATAGCAACAATAACAACAACAACAACAAAAAGACAAAAAAAAAAA	C	17	WXP3,WXP6,XP1,XP3,XP4,XP6,XP7,LA4,LA5,DU2	ENSSSCG00000004147	ENSSSCT00000004583.4	intron_variant,feature_truncation	MODIFIER	ECT2L	protein_coding	INTRON=9/19,STRAND=-1	2	5	3	10
sv_00438	1	25604659	25604937	278	DEL	GAAAAGCTGTTGGAGTTCCCGTCGTGGCGCAGTGGTTAACGAATCCGACTAGGAACCATGAGGTTGCGGGTTCGGTCCCTGCCCTTGCTCAGTGGGTTAACGATCCGGCGTTGCCGTGAGCTGTGGTGTAGGTTGCAGACGCGGCTCGGATCCCGAGTTGCTGTGGCTCTGGCGTAGGCCGGTGGCTACAGCTCCGATTCAACCCCTAGCCTGGGAACCTCCATATGCTGCAGGAGTGGCCCAAGAAATAGCAACAACAACAAAAGACAAAAAAAAAAA	G	18	WXP2,WXP3,WXP5,WXP7,XP1,XP2,XP3,XP4,XP6,XP7,LW5,LW6,LW7,LA4,LA5	ENSSSCG00000004147	ENSSSCT00000004583.4	intron_variant,feature_truncation	MODIFIER	ECT2L	protein_coding	INTRON=7/19,STRAND=-1	4	6	5	15
sv_00439	1	25672263	25672562	299	DEL	TTAAAAAGATTTTTTTGCTTTTTTTTTTTTTTTTTTGTCTTTTGTTGTTGTTGTTGTTGCTATTTCTTGGGCCGCTCCCGCGGCATATGGAGGTTCCCAGGCTAGGGGTCAAATCGGAGCCGTAGCCACCGGCCTACGCCAGAGCCACAGCAACGCGGGATCCGAGCCGCGTCTGCAACCTACACCACAGCTCACGGCAACGCCGGATCCTTAACCCACTGAGCAAGGGCAGGGACCGAACCCCGCAACCTCATGGTTCCTAGTCGGATTCGTTAACCACTGCGCCACGACGGGAACTCC	T	10	WXP6,XP2,XP7,LW7,LA5	-	-	intergenic_variant	MODIFIER	-	-	-	1	2	2	5
sv_00440	1	25725185	25727003	1818	DUP:TANDEM	TAGGTTTTCATCTTTTAATGAGAGATTTAAGTGTTCTATTTCATTTTATTTTCTTTTTACTTATTCATCTATTTTTGGCTGTGCTCTTGGTATGTGGAAGATCCCAGTTCAGGGACTGAATCCGAGAACCGCTACAGTGGCAATGCCAGATCCTTAGCCTGATGCACCACAAGAGAAGATTTGAATGTGTTTTAAAGGTTCAAGTGGCAAATGGAGAAAGAGAGATCAAACTTTTTTAAAGGGGGTGAGGGAAGGAGCAAGGTGTCAGAGATGCAGGAACAGATGTATCCTTCCTAAGCACAAACAGGTAGAGCATCCTGGAGACTGAGGAAGTGATGCGTGTGTATACAGGCAACTCTGTAGGTAGAGGAGAAGCCTCTGTACTGTTTGTCATGAGGA…	TAGGTTTTCATCTTTTAATGAGAGATTTAAGTGTTCTATTTCATTTTATTTTCTTTTTACTTATTCATCTATTTTTGGCTGTGCTCTTGGTATGTGGAAGATCCCAGTTCAGGGACTGAATCCGAGAACCGCTACAGTGGCAATGCCAGATCCTTAGCCTGATGCACCACAAGAGAAGATTTGAATGTGTTTTAAAGGTTCAAGTGGCAAATGGAGAAAGAGAGATCAAACTTTTTTAAAGGGGGTGAGGGAAGGAGCAAGGTGTCAGAGATGCAGGAACAGATGTATCCTTCCTAAGCACAAACAGGTAGAGCATCCTGGAGACTGAGGAAGTGATGCGTGTGTATACAGGCAACTCTGTAGGTAGAGGAGAAGCCTCTGTACTGTTTGTCATGAGGA…	6	XP2,XP3,XP5,XP6	-	-	intergenic_variant	MODIFIER	-	-	-	0	4	0	4
sv_00441	1	25859417	25859691	274	DEL	TAATTTTGCTGTCAGGAGTTCCCGTCGTGGCGCAGTGGTTAACGAATCCGACTAGGAACCATGAGGTTGCGGGTTCGATCCCTGGCCTTGCTCAGTGGGTTAACGATCCGGCGTTGCCGTGAGCTGTGGTGTAGGTTGCAGACGCGGCTCGGATCCCACGTTGCTGTGGCTCTGGCGTAGGCCGGTGGCTACAGCTCCGATTAGACCCCTAGCCTGGGAATCTCCATATGCCGCGGAAGCGGCCCAAGAAATAGCAAAAAGACCAAAAAAAAAAA	T	15	XP1,XP3,XP4,XP6,LW6,LW7,LA5,DU1,DU7	ENSSSCG00000004149	ENSSSCT00000004585.4	intron_variant,feature_truncation	MODIFIER	NHSL1	protein_coding	INTRON=1/6,STRAND=1	0	4	5	9
sv_00442	1	25995218	25995505	287	DEL	TAGAACTGTGAATGTTGGGAGTTCCCATCGTGGCGCAGTGGTTAACGAATCCGACTAGGAACCATGAGGTTGCGGGTTCGGTCCCTGCCCTTGCTCAGGGGGTTAACGATCCGGCGTTGCCGTGAGCTGTGGTGTAGGTTGCAGACGTGGCTCGGATCCCGCGTTGCTGTGGCTCTGGCGTAGGCCGGTGGCTACGGCTCCGATTCGACCCCTGGCCTGGGAACCTCCATATGCCGCAGGAGCGGCCCAAGAAATAGCAAAAAGATAAAAAAAAAAAAAAAAAAAAAA	T	11	XP3,XP6	ENSSSCG00000020384	ENSSSCT00000021979.2	downstream_gene_variant	MODIFIER	SNORA70	snoRNA	DISTANCE=3710,STRAND=1	0	2	0	2
sv_00443	1	26024086	26024371	285	DEL	ATTTCTTTTTTTTTGTCTTTTTGTTGTTGTTGTTGTTGCTATTTCTTGGGCCGCACCCGCGGCATATGGAGGTTCCCAGGCTAGGGGTCAAATCGGAGCTATAGCCACCGGCCTACGCCAGAGCCACAGCAACACGGGATCCGAGCCGCATCTGCAACCCACACCACAGCTCACGGCAATGCCGGATCGTCAACCCACTGAGCAAGGGCAGGGACCGAACCCGCAACCTCATGGTTCCCAGTCGGATTCGTTAACCACTGAGCCACAACGGGAACTCCCCTCTTCG	A	10	WXP6,WXP7,XP1,XP3,XP4,XP5,XP6,XP7,LW7	-	-	intergenic_variant	MODIFIER	-	-	-	2	6	1	9
sv_00444	1	26078234	26078534	300	DEL	ACAGGAGTCTACAATTTTTTTTTTTTTTTTGTCTTTTGTTGTTGTTGTTGTTGTTGTTGTTGCTATTTCTTGGGCTGCTCCCGCGGCATATGGAGGTTCCCAGGCTAGGGGTTGAATCGGAGCTGTAGCCACCGGCCTACGCCAGAGCCGCAGCAACGCGGGATCCGAGCCGTGTCTGCAACCTACACCACAGCTCACGGCAATGCCGGATCATTAACCCACTGAGCAAGGGCAGGGACCGAACCCGCAACCTCATGGTTCCTAGTCGGATTTGTCAACCACTGCGCCACGACGGGAACTC	A	8	WXP6,XP3,XP6,XP7,LW6,LW7,LA5	ENSSSCG00000022968	ENSSSCT00000023062.3	intron_variant,feature_truncation	MODIFIER	ARFGEF3	protein_coding	INTRON=32/32,STRAND=-1	1	3	3	7
sv_00445	1	26088437	26088724	287	DEL	TAAGAATTTAAATAGGAGCTCCCGTCGTGGCACAGTGGTTAACGAATCTGACTGGGAACCATGAGGTTGCAGGTTCGGTCCCTGCCCTTGCTCCGTGGGTTAACGATCTGGCGTTGCCGTGAGCTGTGGTGTAGGTTGCAGACACGGCTCGGATCCCGCGTTGCTGTGGCTCTGGCGTAGGCCGGTGGCTACAGCTCCGATTAGACCCCTAGCCTGGGAACCTCCATATGCCACAGGAGCGGCCCAAGAAATAGCAACAATAACAACAACAACAACAACAACAAAAAA	T	6	XP3,XP6	ENSSSCG00000022968	ENSSSCT00000023062.3	intron_variant,feature_truncation	MODIFIER	ARFGEF3	protein_coding	INTRON=30/32,STRAND=-1	0	2	0	2
sv_00446	1	26113164	26113438	274	DEL	CAAAAGCCTTCTAGGAGTTCCCGTCGTGGCGCAGTGGTTAGCGAATCCGACTAGGAACCATGAGGTCGCGGGTTCGGTCCCTGCCCTTGCTCAGTGGGTTAACAATCCGGCGTTGCCGTGAGCTGTGGTGTAGGTTGCAGATGCGGCTCGGATCCCGCGTTGCTGTGGCTCTGGCGTAGGACAGTGGCTGCAGCTCCGATTAGACCCCTAGCCTGGGAACCTCCATATGCCGCGGGAGTGGCCCAGAGAAATAGCAAAAAGACAAAAAAAAAAAA	C	11	LW6,LW7	ENSSSCG00000022968	ENSSSCT00000023062.3	intron_variant,feature_truncation	MODIFIER	ARFGEF3	protein_coding	INTRON=21/32,STRAND=-1	0	0	2	2
sv_00447	1	26116984	26117094	110	DUP:TANDEM	TAAGTGGGCAGATTCTGCTCCAATACCTTGCGTCTTTAAGACTTTCACCCTCTGCCAACCAATCTGTGTGTGCAGGCTGGGGAGAATATTCAAAGTTCAGCTAGTTCTTTA	TAAGTGGGCAGATTCTGCTCCAATACCTTGCGTCTTTAAGACTTTCACCCTCTGCCAACCAATCTGTGTGTGCAGGCTGGGGAGAATATTCAAAGTTCAGCTAGTTCTTTATGAAGTGGGCAGATTCTGCTCCAATACCTTGCGTCTTTAAGACTTTCACCCTCTGCCAACCAATCTGTGTGTGCAGGCTGGGGAGAATATTCAAAGTTCAGCTAGTTCTTTA	8	WXP7,XP3,LW6,LA5,DU6,DU7	ENSSSCG00000022968	ENSSSCT00000023062.3	intron_variant	MODIFIER	ARFGEF3	protein_coding	INTRON=21/32,STRAND=-1	1	1	4	6
sv_00448	1	26134477	26134477	65	INS	G	GTTATCTATGAGCATATGAGAATTATTAGGAACAATTTTGGGCTTCACACCCAAACAGTACTTCAT	5	WXP1,WXP2,WXP5,XP6	ENSSSCG00000022968	ENSSSCT00000023062.3	intron_variant,feature_elongation	MODIFIER	ARFGEF3	protein_coding	INTRON=13/32,STRAND=-1	3	1	0	4
sv_00449	1	26168284	26168574	290	DEL	TAAAAGACAGTTTAGGAGTTCCCGTCGTGGCACAGTGGTTAATGAATCTGACTAGGAACCATGAAGTTGCGGGTTCGGTCCCTGCCCTTGCTCAGTGGGTTAACGATCCGGCATTGCCGTGAGCTGTGGTGTAGGTTGCAGACGCAGCTCGGATCCCGCGTTGCTGTGGCTCTGGCGTAGGCCGGTGGCTACAGCTCCGATTCCACCCCTAGCCTGGGAACCTCCATATGCCGCGGGAGCGGCCCAAGAAATAGCAACAACAACAACAACAACAACAACAACAACAACAAA	T	3	XP1,XP3	ENSSSCG00000022968	ENSSSCT00000023062.3	intron_variant,feature_truncation	MODIFIER	ARFGEF3	protein_coding	INTRON=6/32,STRAND=-1	0	2	0	2
sv_00450	1	26184522	26184828	306	DEL	TGGCAACACCTAATTCTTTTTTTTTTTTTTTGTCTTTTGTCTTTTTTTTGTTGTTGTTGTTGTTTCTATTTCTTAGGCCGCTCCCGTGGCATATGGAGGTTCCCAGGCTAGGGGTTGAATCGGAGCTGTAGCCACTGGCCTATGCCACAGCCACAGCAACGCGGGATCCGAGCCGAGTCTGCAACCTACACCACAGCTCACGGCAACGCCGGATCGTTAACCCACTGAGCAAGGGCAGGGACCGAACCCGCAACCTCATGGTTCCTAGTCGGATTCGTTAACCACTGCGCCACGACGGGAACTCCCC	T	14	WXP5,WXP7,XP2,XP3,XP7	ENSSSCG00000022968	ENSSSCT00000023062.3	intron_variant,feature_truncation	MODIFIER	ARFGEF3	protein_coding	INTRON=5/32,STRAND=-1	2	3	0	5
sv_00451	1	26204566	26204634	68	DEL	GAGAAAGAGACTTTCTAAAAAAAAAATAAAAATAAAAAATAAATAAAAAAATAAAATAAAAAAAAAAAA	G	14	WXP1,WXP2,WXP3,WXP4,WXP5,WXP7,XP2,XP3,XP5,XP6,XP7,LW6,LW7,DU4	ENSSSCG00000022968	ENSSSCT00000023062.3	intron_variant,feature_truncation	MODIFIER	ARFGEF3	protein_coding	INTRON=4/32,STRAND=-1	6	5	3	14
sv_00452	1	26227262	26227565	303	DEL	AAAAAGAAAAAAGTGGGAGTTCCCGTCGTGGCGCAATGGTTAACGAATCCGACTAGGAACCATGAGGTCTCGGGTTCGGTCCCTGCCCTTGCTCAGTGGGTTAACGATCCGGCGTTGCCGTGAGCTGTGGTGTAGGTTGCAGACGCGGCTCGGATCCTGCGTTGCTGTGGCTGTGGCGTAGGCCGGTGGCTACAGCTCCGATTCAACCCCTAGCCTGGGAACCTCCATATGCCGCGGAAGCGGCCCAAGAGATAGCAACAACAACAACAAAAAGACAAAAAGACAAAAAAAAAAATAAATAAAT	A	14	WXP1,WXP5,WXP6,WXP7,XP1,XP3,XP4,XP5,XP6,XP7,LW6,LW7	ENSSSCG00000022968	ENSSSCT00000023062.3	intron_variant,feature_truncation	MODIFIER	ARFGEF3	protein_coding	INTRON=2/32,STRAND=-1	4	6	2	12
sv_00453	1	26240210	26240513	303	DEL	CAAAACAGGACAGACGGCAGTTCCCGTCGTGGCGCAGTGGTTAACGAATCCGACTAGGAACCATGAGGTTGCGGGTTCGGTCCCTGCCCTTGCTCAGCGGGTTAACGATCCGGCGTTGCCGTGAGCTGTGGTGTAGGTTGCAGATGCGGCTCGGATCCCGCGTTGCTGTGGCTCTGGCGTAGGCCGGTGGCTACAGCTCCGATTCGACCCCTAGCCTGGGAACCTCCATATGCCGCGGGAGCGGCCCAAGAAATAGCAACAACAACAACAACAAAAAAAAAAGACAAAAGACAAAAAAAAAATA	C	6	XP3,XP6,LW4	ENSSSCG00000022968	ENSSSCT00000023062.3	intron_variant,feature_truncation	MODIFIER	ARFGEF3	protein_coding	INTRON=2/32,STRAND=-1	0	2	1	3
sv_00454	1	26247344	26247491	147	DUP:TANDEM	TGCATTTCTCTCATGATGGTGGAGGCGGGGAGGGGAAAGGGTGAGCTGAGGAAATGGGGAAATGGGATTCATTCTCTCAGGGCTGCTGCCAGTGGCTACAGAGTTCGAGAGAAGGTGTCCAACCAAGAGGCCAGAGAGAGCATAAATC	TGCATTTCTCTCATGATGGTGGAGGCGGGGAGGGGAAAGGGTGAGCTGAGGAAATGGGGAAATGGGATTCATTCTCTCAGGGCTGCTGCCAGTGGCTACAGAGTTCGAGAGAAGGTGTCCAACCAAGAGGCCAGAGAGAGCATAAATCGCATTTCTCTCATGATGGTGGAGGCGGGGAGGGGAAAGGGTGAGCTGAGGAAATGGGGAAATGGGATTCATTCTCTCAGGGCTGCTGCCAGTGGCTACAGAGTTCGAGAGAAGGTGTCCAACCAAGAGGCCAGAGAGAGCATAAATC	8	LW5,LW7	ENSSSCG00000022968	ENSSSCT00000023062.3	intron_variant	MODIFIER	ARFGEF3	protein_coding	INTRON=2/32,STRAND=-1	0	0	2	2
sv_00455	1	26378849	26379132	283	DEL	GAAAGAAATTCCTCTTTTTTTTTTTTTTCTTTTTGGTCTTTTTTGCTATTTCTTGGGCCGCTTCTGCGGCATATGGAGATTCCCAGGCTAGGGGTCCAATCGGAGCTGTAGCCACTGGCCTACGCCAGAGCCACAGCAACGTGGGATCCAAGCCGCATCTGCAACCTACACCACAGCTCACGGTAACGCCGGATCGTTAACCCACTGAGCAAGGGCAGGGACCGAACCCGCAACCTCATGGTTCCTAGTCGGATTCGTTAACCACTGCGCCATGACGGGAACTC	G	14	WXP2,WXP6,WXP7,XP3,XP4,XP6	-	-	intergenic_variant	MODIFIER	-	-	-	3	3	0	6
sv_00456	1	26392673	26392965	292	DEL	CAAACATGTATTTCTTTTTTTTTTTTTTTTTTTTTTTTTTTTGTCTTTTTGCTATTTCTTTGGGCCGCTCCCGCGGCATATGGAGGTTCCCCGGCTAGGGGTCTAATCGGAGCTGTAGCCACCGGCCTCCGCCAAAGCCACAGCAATGCGGGATCCGAGCCGCATCTGCAACCTACACCACAGCTCACAGCAACGCTGGATCATTAACCCACTGAGCAAGGGCAGGGACCGAACCCACAACCTCATGGTTCCTAGTCGGATTCGTTAACCACTGCGCCACGACGGGAACTCCA	C	7	WXP1,WXP5,WXP6,XP2,XP4,XP5,XP6,XP7,LW6	-	-	intergenic_variant	MODIFIER	-	-	-	3	5	1	9
sv_00457	1	26406212	26406592	380	DEL	CCCTTTGGTAATCATAAGTTTTGGATATGATTTCTTTTGAGGCATATACCTTAAAATCTCTTAAGACCTAAGGAGAAAGAGGGTCTTATTTTGAGTCACTGTAAACACTTGATTTAAGTTTGATTTCAGGACGTCAAGACTAGCCCACAGAGAAAGTATGAGTATTTGAAAGACCTGGAAAAATGCTTAAGAAAACCCCTTCATGTATTAAATATTCCCAGCTGGAGATAGGAGATCATGAATTCAGATTCATTTCTTGTGATTAAAACTGTGCTTTCCAAGACTGTTTTCTTCAGTACAAATGTCTTTGGGTACGAGTGAGGGATGCCAAGCACTCAGCTTCAAAATGTGCCACCTGGTCCCATCCAGGCTCTGCCACTT	C	14	WXP3,WXP5,XP4,XP6	-	-	intergenic_variant	MODIFIER	-	-	-	2	2	0	4
sv_00458	1	26412800	26413076	276	DEL	ACAATCCCAATTTTTTTTTTTTTTTTTTTTTTTTTGCCATTTCTTGCGCCGCTCCCGCGGCATATGGAGGTTCCCAGGCTAGGGGTCCAATCGGAGCTGTAGCTGCCAGCCTACGCCAGAGCCACAGCAACACGGGATCCGAGCCGCGTTTGCAACCTCCACCACGGCTCACGGCAATGCCGGATCGTTAACCCACTTAGCAAGGGCAGGGATCGAACCCGCAACCTCATGGTTCCTAGTCAGATTCATTAACCACTGTGCCACGACGGGAACTCCG	A	11	LW6,LW7	-	-	intergenic_variant	MODIFIER	-	-	-	0	0	2	2
sv_00459	1	26845134	26845434	300	DEL	GGGAGTTCCCGTCGTGGCGCAGTGGTTAACGAATCCGACTAGGAACCATGAGGTTGCCGGTTTGGTCCCTGCCCTTGCTCAGTGGTTAAGGATCCGGCGTTGCCCTGAGCTGTGGTGTAGGTTGCAGACGCGGCTCGGATCCCGCGTTGCTGTGGCTCTGGCGTAGGCCGGTGGCTACAGCCCCGATTCGACCCCTAGCCTGGGAACCTCCATATGCCGTGGGAGCGGCCCAAGAAATAGCAACAACAACAACAACAACAACAACAACAACAAAAGACAAAAAAAAAAAAAATCCCAACAA	G	5	XP3,XP6	-	-	intergenic_variant	MODIFIER	-	-	-	0	2	0	2
sv_00460	1	26891766	26892013	247	DEL	AGGGAGACTGCCACGTCTTATTTTTAAAAAAGAGTTGATCTTGATTCAGAGGTTAAAAGAGCCGTAGGGGTTTAGCTTCCGCTGACCTCAGAAAAGAAGCCATTAAATATCCTGCTATCATCCTATTCAGTATCCGTAGCCTCCTTGTCATCAGGGTTTTTAAGAATACAAACAAAAGACACAAAATCTAGCTCTCTTTTTATTTCAAGGAGCTTTTCAATGGCACGCCAAGTTCTTCTCCTGATCTT	A	10	WXP1,WXP2,WXP4,WXP5,WXP6,WXP7,XP1,XP2,XP3,XP4,XP5,XP6,XP7,LA4,DU1,DU2	-	-	intergenic_variant	MODIFIER	-	-	-	6	7	3	16
sv_00461	1	26915786	26915839	53	DEL	CTGGATAAAGGAAATCAACACAGGCTATTGGCAAGAATCCCGCTAGCAATGCCA	C	6	WXP1,XP7	-	-	intergenic_variant	MODIFIER	-	-	-	1	1	0	2
sv_00462	1	26976491	26977437	946	DEL	AATAGATGCAAACTATAGCCTTTGGAATGGATCAACTATGGGATCCTGCTGTAGGAACCATGTCTGGTCACTTGTGATAGAGCATGATAATGTGAGAAAAAAGAATGTATACGTGTATGTGTGACTGGGTCACCTTGCTGTGCAGCAGAACATTGACAAAACACTGTCATGCCATTAATCAGCTATAATGGAAAAAATTAAAATCATTATAAATAAAAAATTAAATAAAATTATATAAATAAAAAATAAAAATAAACCTATACATTAGAATATTAAAAAAAAAAAAGAAACTTTCTGCCCAAGTAAAATGCATGGGCTCTGTTGCCAAAGATTTTGTATCAAGAAAATTTGTCTCATATTAAAAAATTAGGTCATTAACAAAGATATTTTTAAGTAAAT…	A	10	WXP5,XP5,XP6,LA5	-	-	intergenic_variant	MODIFIER	-	-	-	1	2	1	4
sv_00463	1	26994202	26994498	296	DEL	GAACACAACACAGGAGTTCCCGTCGTGGCGCAGTGGTTAACGAATCCGACTAGGAACCATGAGGTTGCGGATTCGGTCCCTGCCCTTGCTCAGTGGGTTAACGATCCGGCGTTGCCCTGAGCTGCGGTGTAGGTTGCAGATGCGGCTCAGATCCCGCGTTGCTGTGGCTCTGGCGTAGGCCGGTGGCTACAGCTCCGATTCGACCCCTAGCCTGGGAACCTCCATATGCCGCGGGAGCGGCCCAAGAAATAGCAAAAAGACAAAAAAAAAACAAAAAACAAAAAAAACAAAAAAAAA	G	7	WXP2,WXP5,XP4	-	-	intergenic_variant	MODIFIER	-	-	-	2	1	0	3
sv_00464	1	27007907	27008223	316	DEL	CAGAAATTAGTGAAATATAGGAGTTCCCGTCGTGGCGCAGTGGTTAACGAATCCAACTAGGAACCATGAGGTTGCGGGTTCGATCCCTGGCCTTGCTCGGTGGGTTAAGGATCCGGCGTTGCCGTGAGCTGTGGTGTAGGTTGCAGACACGGCTCGGGTCCCGCGTTGCTGTGGCTCTGGTGTAGGCCGGTGGCTACAGCTCCAATTCGACCCCTAGCCTGGGAACCTCCATATGCCGTGGGAGCGGCCCAAGAAATAGCAACAACAACAACAACAAAAGAAAAAAAAAAAAAAGGACAAAAGACCAAAAAAACAAA	C	16	WXP5,WXP6,XP3,XP6,XP7,LW7,DU6	-	-	intergenic_variant	MODIFIER	-	-	-	2	3	2	7
sv_00465	1	27141708	27141880	172	DEL	CTTGCTCAGCAGGTTAAGGATCCAGCATTGCCGTGAGCTGTGGTGTAGATCACAGACGAGGCTTGGATCCCGTCTTGCTGTGGCTGTGGTGTAGGCCAGCAGCTACAGCTCTGATTCGACCCCTAGCCTGGGAACTTCCATACGCCATGGATATGGCCCTAAAAGATAAAAAA	C	5	WXP1,WXP3,WXP5,XP1,XP2,XP3,XP6	ENSSSCG00000004157	ENSSSCT00000004596.4	intron_variant,feature_truncation	MODIFIER	IL20RA	protein_coding	INTRON=1/6,STRAND=1	3	4	0	7
sv_00466	1	27184255	27184534	279	DEL	TTTTAGTCCATTCTTTTTTTTTTTTTTTTTGTCTTTTTGCTATTTCTTGGGCCGCTCCCGCGGTATATGGAGTTTTCCCAGGCTAGGGGTCTAATCGTAGCTGTAGCTGCCAGCCTATGCCAGAGCCACAGCAACGCGGGATCCGAGCTGCATCTGCAACCTACACCACAGCTCATGGCAACGCCGGATCGTTAACCCACTGAGCAAGGGCAGGGATCGAACCCGCAACCTCATGGTTCCTAGTCGGATTCGTTAACCACTGCGCCACGACGGGAACTCC	T	10	XP3,XP5,XP6	-	-	intergenic_variant	MODIFIER	-	-	-	0	3	0	3
sv_00467	1	27187593	27187657	64	DEL	TATAAATAAAATAAATAAAGTTCTTAAATAACTAAAGTTCTTTATTTATTTTATAAATAAAATAA	T	7	WXP4,WXP6,XP2,XP3,XP6,LA4,LA5	-	-	intergenic_variant	MODIFIER	-	-	-	2	3	2	7
sv_00468	1	27220145	27220426	281	DEL	CTCTCCACCCTTTCTTTCTTTCTTTTTTTTTGTCTTTTTGCTATTTCTTTGGGCCGCTCCCGCGGCATATGGAGGTTCCCAGGATAGGGGTCGAATCGGAGCTGTAGCCATCGGCCTACGCCAGAGCCACAGCAACGCGGGATCCGAGCCGCGTCTGCAACCTACACCACAGCTCACGGCAACGCCGGATCGTTAACCCACTGAGCAAGGGCAGGGAGCGAACCCGCAACCTCATGGTTCCTAGTCGGATTCGTTAACCACTGCACCACGACGGGAACTCCT	C	4	DU1,DU2,DU4	-	-	intergenic_variant	MODIFIER	-	-	-	0	0	3	3
sv_00469	1	27236717	27236982	265	DEL	CAAAGATGTGGCTCCGGAGTTCCCGTCGTGGCGCAGTGGTTGACGAATCCGACTAGGAACCATGAGGTTGTGGGTTCGGTCCCTGCCCTTGCTCAGTGGGTTAACGATCCGGCGTTGCCGTGAGCTGTGGTTTAGGTTGCAGACACGGCTCGGATCCTGCGTTGCTGTGGCTCTGGTGTAGGCCAGTGGCTATGGCTCCGATTCAACCCCTAGCCTGGGAACCTCCATATGCCGCAGGGGCGGCCCAAGAAATAGCAAAAAAAAAA	C	14	WXP1,WXP3,WXP4,WXP5,WXP6,XP1,XP2,XP3,XP4,XP5,XP6,XP7,LW6,LW7,LA4,LA6,LA7,DU1	-	-	intergenic_variant	MODIFIER	-	-	-	5	7	6	18
sv_00470	1	27291452	27291767	315	DEL	AAAGTAAATAACAAAAAGAGGAGTTCCCGTCGTGGCGCAGTGGTTAACGAATCCGACTAGGAACCATGAGGTCGCGGGTTCCGTCCCTGCCCTTGCTCAGTGGGTTAACGATCCGGCCTTGCCGTGAGCTGTGGTGTAGGTTGCAGACGCGGCTCGGATCCCGCGTTGCTGTGGCTCTGGCGTAGGCCGGTAGCTACAGCTCCGATTCGACCCCTAGCCTGGGAACCTCCATATGCCGCGGGAGCGGCCCAAGAAATGGCAACAACAACAACAACAAAAGACAAAAGACAAAAAAAAAAAAAAAAAATGAATAAAT	A	17	WXP5,WXP6,XP1,XP2,XP3,XP4,XP5,XP6,XP7,LW4,LW5,LW6,LW7,LA4,LA6,LA7,DU1	ENSSSCG00000004160	ENSSSCT00000047196.2	intron_variant,feature_truncation	MODIFIER	PEX7	protein_coding	INTRON=9/10,STRAND=-1	2	7	8	17
sv_00471	1	27305076	27305198	122	DEL	TAAATGTGGAATCTGGGGGAAAAATGTAATTGTAATGTATACATGTAAGGATAACCTGACACCCTTGCTGTACAGTGGGAAAATAAAAAAAAATAAAAAAAAAAGAATACACATCAAAAAAAA	T	18	WXP1,WXP3,WXP4,WXP5,WXP7,XP2,XP3,XP5,XP6,LW7	ENSSSCG00000004160	ENSSSCT00000047196.2	intron_variant,feature_truncation	MODIFIER	PEX7	protein_coding	INTRON=9/10,STRAND=-1	5	4	1	10
sv_00472	1	27318208	27318491	283	DEL	ACTGATTCCTGATTTCTTTTTTTTTTTTTTTTTTTGTCTTTTTGCTATTTCTTTGGGCCGCTTCCACGGCATATGGAGGTTCCCAGGCTAGGGGTCTAATCGGAGCTGTAGCCGCCAGTCTACACCAGAGCCACAGCAACACAGGATCTGAGCCGTGTCTGCAACCTACACCACAGCTCACGGCAATGCTGGATCGTTAACCCACTGAGCAAGGGCAGGGATCGAACCCGCAACCTCATGGTTCCTAGTCGGATTCGTTAACCACTGCGCCACGATGGGAACTC	A	21	WXP2,WXP3,WXP4,WXP5,WXP6,WXP7,XP1,XP3,XP4,XP5,XP6,XP7,LW5,LW6,LW7,LA7,DU2,DU7	ENSSSCG00000004160	ENSSSCT00000047196.2	intron_variant,feature_truncation	MODIFIER	PEX7	protein_coding	INTRON=6/10,STRAND=-1	6	6	6	18
sv_00473	1	27358733	27358806	73	DUP:TANDEM	AGGCTACCTGACAGATATCTCTTCTCTTAAGTGGATATAGCTGGGTGAAGCTTCTAGGAAAGCTATTTTAAAAG	AGGCTACCTGACAGATATCTCTTCTCTTAAGTGGATATAGCTGGGTGAAGCTTCTAGGAAAGCTATTTTAAAAGGGCTACCTGACAGATATCTCTTCTCTTAAGTGGATATAGCTGGGTGAAGCTTCTAGGAAAGCTATTTTAAAAG	5	LW4,LW6,LW7,DU7	ENSSSCG00000050757	ENSSSCT00000076987.1	intron_variant,non_coding_transcript_variant	MODIFIER	-	lncRNA	INTRON=3/4,STRAND=1	0	0	4	4
sv_00474	1	27358734	27358734	73	INS	G	GGCTACCTGACAGATCTCTCTTCTCTTAAGTGGATATAGCTGGGTGAAGCCTCTAGGAAAGCTATTTTAAAAGA	6	WXP7,XP5	ENSSSCG00000050757	ENSSSCT00000076987.1	intron_variant,non_coding_transcript_variant,feature_elongation	MODIFIER	-	lncRNA	INTRON=3/4,STRAND=1	1	1	0	2
sv_00475	1	27487873	27489821	1948	DEL	AGAAAGCATGGGGGTTTTTTTTTTATAATTTTTTTTATTTTCCCACTGTACAGCAAGGGGGTCAGGTTATCCTTACATGTATACATTACAATTACATTTTTCCCCCACCCTTTCTTCCATTGCAACATGAGTATCTAGACAAAGTTCTCAATGCTACTCAGCAGGATCTCCTTGTAAATCTATTCTAAGTTGTGTCTGATAAGCCCAAGCTCCCGATCCCTCCCACTCCCTCCCCCTCCCATCAGGAAACCACAAGTCTCTTCTCCAAGTCCATGATTTTCTTTTCTGAGGAGATGTTCATTTGTGCTGGATATTAGATTCCAGTTATAAGTGATATCATATGGTATTTGTCTTTGTCTTTCTGGCTCATTTCACTCAGGATGAGATTCTCTAGTTCCA…	A	8	XP1,LW4,LW5,DU5	ENSSSCG00000026041	ENSSSCT00000025418.3	intron_variant,feature_truncation	MODIFIER	MAP3K5	protein_coding	INTRON=6/28,STRAND=1	0	1	3	4
sv_00476	1	27560300	27560606	306	DEL	TAAGAAATAAGAATGAGGGAGTTCCCGTCGTGGCGCAGTGGTTAACAAATCCGACTAGGAACCATGAGGTTGCGGGTTCGGTCCCTGCCCTTGCTCAGTGGGGTAAGGAGCTGGCGTTGCCGTGAGCTGTGGTGTAGGTTGCAGATGTGGCTCGGATCCTGCGTTGCTGTGCCTCTGGCGTAGGCCGGTGGCTACAGCTCCGATTCAACCCCTAGCCTGGGAACCTCCATATGCCGCAGGAGCGGCCCAAGAAATAGCAACAACAACAACAACAACAAGAGACAAAAAGACAAAAAAAAAAAAAAAA	T	6	XP6,XP7	ENSSSCG00000026041	ENSSSCT00000025418.3	intron_variant,feature_truncation	MODIFIER	MAP3K5	protein_coding	INTRON=17/28,STRAND=1	0	2	0	2
sv_00477	1	27581745	27582051	306	DEL	CCCCAAAGATTTTTTTTTTTTTTTTGTCTTTTTGTCTTTTTGTTGTTGTTGTTGTTGTTGTTGTTGTTGCTATTTCTTGGGCCGCTCCCGCGGCATATGGAGGTTCCCAGGCTAGGGGTTGAATCGGAGCTGTAGCCACCGGCCTACGCCAGAGCCACGGCAACACGGGATCCGAGCCGCGTCTGCAACCTACACCACAGCTCACGGCAACGCCGGATCGTTAACCCACTGAGCAAGGGCAGGGACTGAACCCGCAACCTCATGGTTCCTAGTCGGATTCGTTAACCACTGCGCCACGACGGAAACT	C	8	WXP3,WXP5,WXP6,XP3,XP4,XP6	ENSSSCG00000026041	ENSSSCT00000025418.3	intron_variant,feature_truncation	MODIFIER	MAP3K5	protein_coding	INTRON=24/28,STRAND=1	3	3	0	6
sv_00478	1	27584917	27585184	267	DEL	ACTTTTTCTTTTTCTTTTTTTTTTTTTGTCTTTCTGCTATTTCTTGGGCTGCTCCCGCGGCATATGGAGGTTCCCAGGCTAGGGGTCTAATCGGAGCTGTAGCCACAGCAACTCGGGATCCGAGCCGCGTCTGCAACCTACACCACAGCTCACGGCAACGCCGGATCCTTAACCCACTGAGCAAGGGCAGGGACCGAACCCGCAACCTCATGGTTCCTAGTCGGATTCGTTAACCACTGCGCCATGACGAGAACTCCTCATTTGCATG	A	7	XP6,XP7,LA6	ENSSSCG00000026041	ENSSSCT00000025418.3	intron_variant,feature_truncation	MODIFIER	MAP3K5	protein_coding	INTRON=24/28,STRAND=1	0	2	1	3
sv_00479	1	27611541	27611844	303	DEL	GACCCTCTGGAGTTCCCGTCGTGGCGCAGTGGTTAACGAATCCGACTAGGAACCATGAGGTTGCGGGTTCGGTCCCTGCCCTTGCTCAGTGGGTTAATGATCCGGCGTTGCCGTGAGCTGTGGTGTAGGTTGCAGACGCGGCTCGGATCCCGCGTTGCTGTGGCTCTGGCGTAGGCCGGTGGCTACAGCTCCGATTCAACCCCTGGCCTGGGAACCTCCATATGCCGCGGGAGCGGCCCAAGAAATAGCAACAACAACAATAACAAGAACAACAAAAAAGACAAAAAAAAAAACAAAAACAAAA	G	10	WXP2,WXP6,WXP7,XP2,XP3,XP5,XP6,DU7	ENSSSCG00000039049	ENSSSCT00000038446.2	intron_variant,feature_truncation	MODIFIER	MAP7	protein_coding	INTRON=1/16,STRAND=1	3	4	1	8
sv_00480	1	27672946	27673271	325	DEL	TTAATTTCTTTTTTTTTTTTTTTTTTTTTTTTTTTTTGTCTTTTTTTTTTTTGTCTTTGTTGTTGTTGTTGTTGTTGTTATTGTTGCTATTTCTTGGGCCGCTCCCGCGGCATATGGAGGTTCCCAGGCTAGGGGTCGAATCGGAGCTGTAGCCACCAGCCTACGCCAGAGCCACAGCAACGCGGGATCCGAGCCGCGTCTGCAACCTACACCACAGCTCACGGCAACGCCGGATCATTAACCCACTGAGCAAGGGCAGGGACCGAACCCGCAACCTCATGGTTCCTAGTCGGATTCGTTAACCACTGCGCCACGACGGGAACTCC	T	21	WXP3,WXP5,XP1,XP3,XP5,XP6,LW1,LW2,LW3,LW4,LW5,LW7,LA1,LA2,LA3,LA5,LA6,LA7,DU7	ENSSSCG00000039049	ENSSSCT00000038446.2	intron_variant,feature_truncation	MODIFIER	MAP7	protein_coding	INTRON=1/16,STRAND=1	2	4	13	19
sv_00481	1	27682439	27682730	291	DEL	AAGCAAGTGATTTCTTTTTCTTTTTTTTTTTTTTTTTTTTTGGTCTTTTTGCTATTTCTTTGGGCCGCTCCTGCGGCATATGGAGGTTCCCAGGCTAGGGGTCGAATCGGAGCTGTAGCCACCTGCCTACGCCAGAGCCACAGCTACGTGGGATCCGAGCCGCGTCTGCAACCTACACCACAGCTCAGGGCAACGCCGGATCGTTAACCCACTGAGCAGGGGCAGGGACCGAACCCGCAACCTTGTGGTTCCTAGTCGGATTCGTTAACCACTGCGCCACGACGGGAACTCC	A	8	WXP3,WXP5,WXP7,XP5,LW7,DU7	ENSSSCG00000039049	ENSSSCT00000038446.2	intron_variant,feature_truncation	MODIFIER	MAP7	protein_coding	INTRON=1/16,STRAND=1	3	1	2	6
sv_00482	1	27772594	27772873	279	DEL	CGCAGATCTAATGGAGGTCTTCTCAAAGGATGCCTGCTACCAACTTTGTAAATGTTGGCTCTTAAGTTATTGATCTCTTTGAACCTCTGGCAGTTTTACTGAATTTGTGCCAGGCTGTGAAATAAGACTTATTTGGAATTGTTTTTCTCTCATAATCAAGCTGAAATTATAAACTACCACAAAGATCCCTGAAATTGTGACCTGTGTAAGGTTTACAAGGCTTAAAGTAAATCTGGCCCAGATTTTAGAGTCAGTCATCGATATTGTGGGCTTATGCTAG	C	16	WXP3,WXP4,WXP5,WXP6,WXP7,XP1,XP2,XP3,XP4,XP5,XP6,LA4	ENSSSCG00000039049	ENSSSCT00000038446.2	intron_variant,feature_truncation	MODIFIER	MAP7	protein_coding	INTRON=14/16,STRAND=1	5	6	1	12
sv_00483	1	27774770	27775081	311	DEL	TAAGAATCTGACATCGGGAGTTCCCGTCGTGGCGCAGTGGTTAACGAATCCGACTAGGAACCATGAGGTTGCGGGTTCGGTCCCTGCCCTTGCTCAGTGGGTTAACGATCCGGCGTTGCCGTGAGCTGTGGTGTAGGTTGCAGACGCGGCTCGGATCCCGCGTTGCTGTGGCTCTGGCGTAGGCCGGTAGCTACAGCTCCGATTCAACCCCTAGCCTGGGAACCTCCATATGCCGCGGGAGCGGCCCAAGAAATAGCAACAACAACAACAAAAAAAAGAAGACAAAAAGACAAAAAAAAAAAAAAAAAAAAG	T	14	WXP4,WXP5,WXP6,WXP7,XP2,XP4,XP5,XP6,LA6	ENSSSCG00000039049	ENSSSCT00000038446.2	intron_variant,feature_truncation	MODIFIER	MAP7	protein_coding	INTRON=15/16,STRAND=1	4	4	1	9
sv_00484	1	27798416	27798478	62	DEL	AATATAATAGGCCCTTGCTGTACAGTGGGAAAATAATAATAAAAAATATATATATATATATAT	A	14	WXP2,WXP3,WXP4,WXP6,WXP7,XP2,XP6,DU3	-	-	intergenic_variant	MODIFIER	-	-	-	5	2	1	8
sv_00485	1	27829512	27829747	235	DEL	GGAACACCGAGTCCGTCGTGGCAGTGGTACGAATCCGACTAGAACAAGGGCGGTCGCCTGCTCAGGGTAACGACCGGTGCGGAGCTGTAGGTGGCAGACGGCCGGATCCGCGTGCGTGGCTCGGGGGGGGCTACAGCTCCGATTGACCCTAGCTGGAATCCATATGCCGTGGAGCCCAAGAAATAGAACAAAACAACAAAAAAAAAAAAAAAAAAAAAAAAAAAAAAAAAAAGTAA	G	17	WXP2,WXP4,WXP6,WXP7,XP1,XP2,XP3,XP4,XP5,XP6,XP7,LW1,LW2,LW3,LW6,LW7,LA1,LA2,LA5,DU1,DU2,DU4,DU5,DU6,DU7	-	-	intergenic_variant	MODIFIER	-	-	-	4	7	14	25
sv_00486	1	27876897	27877171	274	DEL	TAGAATTGTTTAGGGGGGAGTTCCCGTCGTGGCGCAGTGGTTAACGAATCCGACTAGGAACCATGAGGTCGCAGGTTCGGTCTGCCTGCTCAGTGGGTATGACCGCGTGCCGTGAGCTGTGGTGTAGGTGCAGACACAGTCGGATCCGCGTTGCTGTGGCTCTGGCGTAGGCGGTGGCTACAGCTGATTCGACCTAGCTGGAACTTCACATGCCGGAAGGCCAAAGATAGCAACAACAAAACAAAAAAAAAAAAAAAAAAAAAAAAAAAAAAAAA	T	18	WXP4,WXP5,XP2,XP4,LW4,LW5,LW6,LW7,LA6,LA7,DU3,DU7	ENSSSCG00000004163	ENSSSCT00000004602.4	intron_variant,feature_truncation	MODIFIER	BCLAF1	protein_coding	INTRON=1/13,STRAND=1	2	2	8	12
sv_00487	1	28005685	28005785	100	DUP:TANDEM	CAAAAACAGCACTCACATGAATTGCATCGGAGCCTCAAACATTTACTTTGAGACATAGTGCATTAAACAATTACACAGTTAATACTGGAGCATATTACTAT	CAAAAACAGCACTCACATGAATTGCATCGGAGCCTCAAACATTTACTTTGAGACATAGTGCATTAAACAATTACACAGTTAATACTGGAGCATATTACTATCTGTGTACAACTGCTTCGTAGTAAAACAAATCTTTCCGTACTCGTGGTAACAATGGTGTGAAAGGGTCAGGCTCCGAAAAACAGCACTCACATGAATTGCATCGGAGCCTCAAACATTTACTTTGAGACATAGTGCATTAAACAATTACACAGTTAATACTGGAGCATATTACTAT	5	XP1,XP7	ENSSSCG00000004164	ENSSSCT00000004603.4	intron_variant	MODIFIER	MTFR2	protein_coding	INTRON=8/8,STRAND=1	0	2	0	2
sv_00488	1	28250454	28250454	63	INS	G	GCTGCTGCAGTCAGAGTCTTAACCCACTGTATGACAGCAGGAATTACAAAAACACATACAATTT	5	WXP5,XP2,XP3,XP5,XP6,LA2,LA6	ENSSSCG00000004165	ENSSSCT00000065157.2	intron_variant,feature_elongation	MODIFIER	PDE7B	protein_coding	INTRON=1/13,STRAND=-1	1	4	2	7
sv_00489	1	28398928	28399244	316	DEL	TAATAAAGGGCAATGCTGGAGTTCCCATCGTGGCGCAGTGGCTAACGAATCCGACTAGGAACCATGAGGTTGCGGGTTCGGTCCCTGCCCTTGCTCAGTGGGTTAACGATCCGGCGTTGCCGTGAGCTGTGGTGTAGGTTGCAGACGCGGCTCGGATCCCTCGTTGCTGTGGCTCTGGCGTAGGCTGGCGGCTACAGCTCCGATAAGACCCCTAGCCTGGGAACCTCCATATGCTGCGGGAGCAGCCCAAGAAATAGCAACAACAACAAAAGACAAAAAGACAAAAAAAATAAATAAATAAATAAAAAATAAAAAAA	T	12	XP4,XP7,LA4,LA6,LA7	-	-	intergenic_variant	MODIFIER	-	-	-	0	2	3	5
sv_00490	1	28440716	28441039	323	DEL	TAAAAACAGGACATGGAGTTCCCGTTGTGGCTCAGTGATTAACGAATCTGACTAGGAACCATGAGGTTGCGAGTTCGATCCCTGGCCTTGCCCAGTGGGTTGGGGTTCTGGCGTTGTCGTGAGCTGTGGTGTAGGTTGCAGACTCGGCTTGTATCCGGCGTTGCTGTGGTCCTGTCATAGGCCAGTGGCTGCGGCTCCGATTCGACCCCTAGCCTGGGAACCTCCATATGTTGCGGGAGTGGCCCAAGAAGTGGCAATAAATAAATAAATAAATAAATAAATAAAAATTAAAAAAATAAAAGCAGGGGCTTTATAATTAAAAAA	T	13	WXP5,WXP7,XP1,XP3,XP5,XP6,LW2,LW3,LW7,LA1,LA3,DU3,DU4,DU5,DU6	-	-	intergenic_variant	MODIFIER	-	-	-	2	4	9	15
sv_00491	1	28607473	28607760	287	DEL	TAAGAAATGGAGGGTTTGGGAGTTCCCGTCGTGGCGTAGTGGTTAACGAATCCGACTAGGAACCATGAAGTTGCGGGTTCGGTCCCTGCCCTTGCTCAGTGGGTTAACGATCTGGCATTGCCATGAGCTGTGGTGCAGGTTGCAGACGCGGCTCGGATACTGCGTTGCTGTGGCTCTGGTGTAGGCTGGTGGCTATGGCTCCAATTAGACCCCTAGCCTGGGAATCTCCATATGCCGCGGGAGCGGCCCAAGAAATAGCAAAAAGACAAAAAAAAAAAAAAAAAAAAA	T	5	WXP6,XP2,XP3,XP6,DU7	ENSSSCG00000004166	ENSSSCT00000004605.3	intron_variant,feature_truncation	MODIFIER	AHI1	protein_coding	INTRON=10/26,STRAND=1	1	3	1	5
sv_00492	1	28684026	28684311	285	DEL	ATAAAAAGTGATTTTTTGGAGTTCCCATCGTGGCGCAGTGGTTAACGAATCCGACTAGGAACCATGAGGTTGCGGGTTCGGTCCCTGCCCTTGCTCAGTGGGTTAAGGATCCAGTGTTGCCGTGAGCTGTGGTGTAGGTTGCAGACACGGCTCGGATCCCGCGTTGCTGTGGCTCTGGCGTAGGCCGGCGGCTATAGCTCCGATTCCACCCCTAGCCTGGGAACCTCCATATGCCGTGGGAGCAGCCCAAGAAATAGCAAAAAGACAAAAAAATAAAAAAAAAAAT	A	8	LA6,LA7	ENSSSCG00000004166	ENSSSCT00000004605.3	intron_variant,feature_truncation	MODIFIER	AHI1	protein_coding	INTRON=21/26,STRAND=1	0	0	2	2
sv_00493	1	28745310	28745593	283	DEL	TTTATTTCAGGAGTTCCCGTCGTGGCGCAGTGGTTAACGAATCCGACTAGGAACCATGAGGTTGCGGGTTCGGTCCCTGCCCTTGCTCAGTGGGTTAAAGATCCGGCGTTGCGTGAGCTGTGGTGTAGTTGCAGACGCGGCTCGGATCCTGCGTTGCTGTGGCTCTGGCGTAGGCCGTGGCTACAGCTCCGATTCGACCCTAGCTGGGAACTCCATATGCCGGAAGCGGCCAAAGAAATAGCAAAAAGACAAAAAAAAAAAAAAAAAAAAAAAAAAAAAAAGAA	T	16	WXP2,WXP3,WXP5,WXP7,XP1,XP3,XP5,XP6,XP7,LW1,LW2,LW3,LW4,LW7,LA1,LA2,LA3,LA5,LA6,LA7,DU7	ENSSSCG00000004166	ENSSSCT00000004605.3	intron_variant,feature_truncation	MODIFIER	AHI1	protein_coding	INTRON=24/26,STRAND=1	4	5	12	21
sv_00494	1	28764448	28764746	298	DEL	CAAGAATAAATGGGGAGTTCCCGTCGTGGCGCAGTGGTTAACGAATCCGACTAAGAACCATGAGGTTGCGGGTTCGGTCCCTGCCCTTGCTCAGTGGGTTAACGATCCGGCGTTGCCGTGAGCTGTGGTGTAGGTTGCAGACGCGGCTCGGATCCCGCGTTGCTGTGGCTCTGGCGTAGGCCGGTGGCTACAGCTCCGATTCAACCCCTAGCCTGGAACCTCCATATGCCGCGGGAGCGGCCCAAGAAATAGCAACAACAACAACAAAAGACAAAAAAAAAAAAAAAAAAAAAAAAAAA	C	6	XP2,XP4,LW4,LW7	ENSSSCG00000004166	ENSSSCT00000004605.3	downstream_gene_variant	MODIFIER	AHI1	protein_coding	DISTANCE=3980,STRAND=1	0	2	2	4
sv_00495	1	28767325	28767431	106	DUP:TANDEM	AGCCTACACCAGAGCCACAGCAACGTGGGATCCAAGCCTCGTCTGCAACCTACACCACAGGTCACCGCAACACTGGATCCTGAACCCACTGAGCAAGGCTAGGGATC	AGCCTACACCAGAGCCACAGCAACGTGGGATCCAAGCCTCGTCTGCAACCTACACCACAGGTCACCGCAACACTGGATCCTGAACCCACTGAGCAAGGCTAGGGATCGCCTACACCAGAGCCACAGCAACGTGGGATCCAAGCCTCGTCTGCAACCTACACCACAGGTCACCGCAACACTGGATCCTGAACCCACTGAGCAAGGCTAGGGATC	9	WXP6,DU4	-	-	intergenic_variant	MODIFIER	-	-	-	1	0	1	2
sv_00496	1	28767325	28767325	106	INS	A	AGCCTACACCAGAGCCACAGCAACGTGGGATCCAAGCCTCGTCTGCAACCTACACCACAGGTCACCGCAACACTGGATCCTGAACCCACTGAGCAAGGCTAGGGATC	3	XP2,DU5	-	-	intergenic_variant	MODIFIER	-	-	-	0	1	1	2
sv_00497	1	28784244	28784349	105	DEL	AGACAAAAAAAAAAAAAAAAAAAAAAAAAAAAAGAAAGAAAGAAAGAAATGTTCTAGGAGACACTCATGCTAACAAAAGACTTTATTAGGAAAGGGCACCAGGATG	A	8	LW6,LW7	-	-	intergenic_variant	MODIFIER	-	-	-	0	0	2	2
sv_00498	1	28948725	28948725	70	INS	G	GACACACAGTGATAAAATGAATGCTTTTGGATTGCATATGAACACTGAAAGTGTTCATGAAATAATGTGGT	7	WXP6,XP1,XP2,XP3,XP6	-	-	intergenic_variant	MODIFIER	-	-	-	1	4	0	5
sv_00499	1	28950935	28951227	292	DEL	TTTTTTTTTTGTCTTTTGTTGTTGTTGTTGTTGTTGCTATTTCTTGGGCCGCTCCCGTGGCATATGGAGGTTCCCAGGCCAGGGGTTGAATCGGAGCTGTAGCCACAGGCCTACGCCAGAGCCACAGCAACACGGTATCCGAGCCGCGTCTGCAACCTACACCACAGCTCACGGCAACGCCGGATCGTTAACCCACTGAGCAAAGGCAGGGACCGAACCCGCAACCTCATGGTTCCTAGTCGGATTCGTTAACCACTGCACCACGACAGGAACTCCATATTTTTTAATTTTTA	T	8	WXP2,WXP4,WXP7,XP2,XP3,XP5,XP6,XP7,LW4,LA6,LA7	-	-	intergenic_variant	MODIFIER	-	-	-	3	5	3	11
sv_00500	1	28988390	28988469	79	DEL	CTTTTCTTTCTTTTTTTTTTTTTTTTTTTTTTTTTTTTTTTTTTTTTTTTTTTTTTTTTTTTTTTTTTTTTTTTTTTTTT	C	21	WXP3,WXP4,WXP6,WXP7,LW4,LW5,LW6,LW7,LA6,LA7,DU1,DU3,DU4	ENSSSCG00000004169	ENSSSCT00000004608.4	intron_variant,feature_truncation	MODIFIER	HBS1L	protein_coding	INTRON=4/18,STRAND=1	4	0	9	13
sv_00501	1	29049252	29049556	304	DEL	GGGGAGTTCCCGTCGTGGCGCAGTGGTTAACGAATCCGACTAGGAACCATGAGGTCGCGGGTTCGGTCCCTGCCCTTGCTCAGTGGGTTAATGATCCGGCGTTGCCGTGAGCTGTGGTGTAGGTTGCAGACGCGGCTCGGATCCCGCGTTGCTGTGGCTCTGGCATAGGCCAGTGGCTACAGCTCCGATTCAACCCCTAGCTTGGGAACCTCCATATGCCGCTTGAGCGGCCCAAGAAATAGCAACAACAACAACAACAACAACAACAACAAAAGACAAAAAAAAAAAAAAAAAAAATTAAAAGA	G	11	WXP2,WXP7,XP4,LA7	ENSSSCG00000004169	ENSSSCT00000004608.4	intron_variant,feature_truncation	MODIFIER	HBS1L	protein_coding	INTRON=17/18,STRAND=1	2	1	1	4
sv_00502	1	29218144	29218219	75	DEL	TGGGTGGGGCTTAGTCTCTGGATGGGATTAAGGCAGCTGTGTGCCTGAGGGGTCTTTAGGTAGCCTGTTTACTGAG	T	12	WXP6,LA5	ENSSSCG00000049766	ENSSSCT00000066719.1	intron_variant,non_coding_transcript_variant,feature_truncation	MODIFIER	-	lncRNA	INTRON=2/6,STRAND=1	1	0	1	2
sv_00503	1	29280105	29280198	93	DEL	TATAGTTGATTTACAATGTTGTACTGCAGCAAAGTGAATCAGATATATATATATATATCTATATATCTACATAGATATATAGATATATATACAC	T	12	WXP1,WXP2,WXP5,WXP6,WXP7,XP2,XP4,LW1,LW2,LW3,LW4,LW6,LW7,LA1,LA2,LA5,LA6,LA7,DU3,DU7	ENSSSCG00000049766	ENSSSCT00000066719.1	intron_variant,non_coding_transcript_variant,feature_truncation	MODIFIER	-	lncRNA	INTRON=3/6,STRAND=1	5	2	13	20
sv_00504	1	29526383	29527137	754	DEL	AAAATATTATGTAAGCCCTAATTGGTGTAAGGCACAATTCTGAGCTTTCAGATTCCAAGATGAATGAAATCCTGGGCAAGACATGAGTTATTTTAAAATCTAGGAAGGAAGATAAGATATATATAAAAATAATTACAGGATTTTCTTGTGGTGCAGCAGGTTAAGGATCTGGCATTGTCATTGCAGTGGCTTAGGTGGCTGCTGTGGCAGGGGTTCTATCTCTGGCCTGGGAACTTCCGCATGCTATAGACACAGACAATTTTTTTTTTCCTACTGTAAGGGTTTTTTGTTGTTGTTGTTGTTGTTGTTGTTGTCATTGTTGTTGTTGTTGTTGCTATTTCTTGGGCCGCTCCCGCGGCATATGGAGGTTCCCAGGCTAGGGATCCAATCGGAGCTGTA…	A	6	WXP5,WXP6	-	-	intergenic_variant	MODIFIER	-	-	-	2	0	0	2
sv_00505	1	29561803	29561876	73	DEL	AGTGTGTTAAGGATCTGGCGTTGCCGAGAGCTGTGGTGTAGGTCACAGATGCGGCTCTGATGCTGCGTTGCTGT	A	3	LW5,LA5	-	-	intergenic_variant	MODIFIER	-	-	-	0	0	2	2
sv_00506	1	29594611	29594929	318	DEL	ACAATGCCTGATCCAGGGAGTTCCTGTGGTGGCGCAGCGGTTAACGAATCCGACTAGGAACCATGAGGTTGTGGGTTCGGTCCCTGGCCTTGCTCAGTGGGTTAAGGATCCGGCGTTGCCGTGAGCTGTGGTGTAGGTTGCAGACGCGGCTCGGATCCCGCGTTGCTGTGGCTCTGGCATAGGCCGGTGGCTACAGCTCCGATTCAACCCCTGGCCTGGGAACCTCCATATGCCGCGGAGCGGCCCAAGAAATAGCAACAACAACAACAAAAAAGACAAAAGACAAAAAAAAACAAAAAAAAAACAAAAAAAAAAAAAC	A	9	WXP3,WXP7,XP3,XP4,XP5,XP6,LW1,LW3,LA1,LA2	ENSSSCG00000044647	ENSSSCT00000090183.1	non_coding_transcript_exon_variant,intron_variant,feature_truncation	MODIFIER	-	lncRNA	EXON=2/2,INTRON=1/1,STRAND=-1	2	4	4	10
sv_00507	1	29654979	29655272	293	DEL	AGAGAACTGTGTTTTTTTTGTTTTGTTTTGTTTTGTTTTTTTGGTCTTTTTTTGCTATTTCTTGGGCCGCTTCCGCGGCATATGGAGGTTCCCAGGCTAGGGGTCTAATCGGAGCTGTAGCCACCGGCCTACGCCAGAGCCACAGCAACGCGGGATCCGAGCCGTGTCTGCAACCTACACCACAGCTCACGGCAACGCCGGATCGTTAACCCACTGAGCAAGGCCAGGGACCAAACCCGCAACCTCATGGTTCCTAGTCGGATTCGTTAACCACTGCGCCACGACGGGAACTCC	A	16	XP5,XP7,LW1,LW4,LW6,LW7,LA1,LA3,LA4,LA6,LA7	ENSSSCG00000021443	ENSSSCT00000062973.2	intron_variant,feature_truncation	MODIFIER	SGK1	protein_coding	INTRON=1/13,STRAND=1	0	2	9	11
sv_00508	1	29660305	29660787	482	DEL	GCCCCTAGCCTGGGAACTTCCATATGCCATGGGTGTGGCCCTCAAAAGAAAAAAGAAAAAAAAAAGAATCAGACCTTCTAATAGTTCTAAGATAGTGAGATAAACATCAAAACAGACAAAAGCTAAAAGCTATGAATGGATAAGTGGATGAAAAAGTTAGATCTGGACCTTAAAAATATGATTAGAGTCCAATGCAAGGAAGCTGGAACAGCAAATGAGGCTGTGAAATTTCCAAAAATTGGGTCTGCCTCTTCATTCAAAGCTCACGGGGTGACAAGCAGATGCTTAGCAACTCATACAACACATATTTGCTGAACTTGATCCACGCAAGACACTGCTTGGGGTGACAAATGACACAAAGATGTCTAAACTGAAATCTTTACCCTTAAAAAATTTACA…	G	13	WXP4,WXP5,WXP6	ENSSSCG00000021443	ENSSSCT00000062973.2	intron_variant,feature_truncation	MODIFIER	SGK1	protein_coding	INTRON=1/13,STRAND=1	3	0	0	3
sv_00509	1	29715232	29715591	359	DEL	TTTTTTTTTTTTTTTTTTGTCTTTTGTCTTTTTTTTTGTTGTTGTTGTTGTTATTGTTGCTATTTCTTGGGCCGCTCCCGCAGCATATGGAGGTTCCCAGGCTAGGGGTTGAATCGGAGCTGTAGCCACCGGCCTACGCCAGAGCCACAGCAACGCGGGATCCGAGCCGCGTCTGCAACCTACACCACAGCTCACGGCAACGCCGGATCATTAACCCACTGAGCAAGGGCAGGGATCGAACCCGCAACCTCATGGTTCCTAGTCGGATTCGTTAACCACTGCGCCACGACGGGAACTCCCTTTTTTTTTTTGTCTTTTGTCTTTTTTTGTTGTTGTTGTTGTTGTTATTGTTGCTATTGC	T	13	XP1,XP7,LW4,LW6,LW7,LA6,LA7	ENSSSCG00000021443	ENSSSCT00000062973.2	intron_variant,feature_truncation	MODIFIER	SGK1	protein_coding	INTRON=2/13,STRAND=1	0	2	5	7
sv_00510	1	29739911	29740087	176	DEL	TTTTTTTTTTTTTTTTTTTTTTTTTGTCTTTGTTTTGTTGTTGCTATTCTCCATATATCCAGCTATTGAATCGAGTTGCGAGCTAGCCAGAGCAAGAACGATCGAGGGCTGCAAAAACAGTCAGCAACGCATTAACCATGAAAAGAAGAACCATGACACGAAATGGAAAAAAATCTA	T	11	WXP1,WXP2,WXP4,WXP5,WXP6,WXP7,XP1,XP2,XP3,XP4,XP5,XP7,LW2,LW3,LW4,LW5,LW7,LA1,LA2,LA5,LA7,DU2,DU3,DU7	ENSSSCG00000021443	ENSSSCT00000037228.1	intron_variant,feature_truncation	MODIFIER	SGK1	protein_coding	INTRON=1/12,STRAND=1	6	6	12	24
sv_00511	1	29788390	29788669	279	DEL	CAAAAAGAATGATGAGGGAGTTCCCGTCGTGGCGCAGTGGTTAACGAATCCAACTAGGAACCATGAGGTTGCGGGTTCGGTCCCTGCCCTTGCTCAGTGGGTTAAGGATCCGGCGTCGCCATGAGCTGTGGTGTAGGTTGCAGACGTGGCTCAGATCCCGAGTGGCTGTGGCTCTGGCGTAGGCCGGTGGCTACAGCTCCAATTCAACCCCTAGCCTGGGAACCTCCATATGCCGCGGGAGCGGCCCAAGAAATAGCAAAAAGACAAAAAAAAAAAAAAA	C	12	WXP3,WXP5	-	-	intergenic_variant	MODIFIER	-	-	-	2	0	0	2
sv_00512	1	29796118	29796406	288	DEL	ACAAAACAAATCTTTTTTTTTTTTTTTTTTTTTTTTGTCTTTTTTGTTGTTGTTGCTATTTCTTGGGCCGCTCCCGCGGCATATGGAGGTTCCCAAGGCTAGGGGTCGAATCGGAGCTGCAGCCGCCGCCAGAGCCACAGCAACGCGGGATCCGAGCCGCGTCTGCAACCTACACCACAGCTCACGGCAACGCCGGATCGTTAACCCACTGAGCAAGGGCAGGAATCGAACCCGCAACCTCATGGTTCCTAGTCGGATTCGTTAACCACTGCGCCACAACGGGAACTCC	A	9	WXP6,XP3,LW4,LW5,LW6,LA6,LA7,DU4,DU5,DU7	-	-	intergenic_variant	MODIFIER	-	-	-	1	1	8	10
sv_00513	1	29919602	29919885	283	DEL	ATATTTTGCCTTTTATTTATTTATTTATTTTTTGTCTTTTTGCTATTTCTTTGGGCAGCACCCGAGGCATATGGAGGTTCCCAGGCTAGGGGTCGAATCGGAGTTGTAGCCCCTGGCCTACGCCAGAGCCACAGCAACGCGGGATCCGAGCTGCGTCTGCAACCTACACCACAGCTCACGGCAACGCCGGATCGTTAACCCACTGAACAAGGGCAGGGACCGAACCCGCAACCTCATGGTTCCTAAGTTGGATTCGTTAACCACTGCACCACGACGGGAACTCC	A	12	WXP4,WXP5,XP4	ENSSSCG00000022387	ENSSSCT00000030224.3	intron_variant,feature_truncation	MODIFIER	TBPL1	protein_coding	INTRON=1/6,STRAND=-1	2	1	0	3
sv_00514	1	29992972	29993594	622	DEL	GACTGTTGTCTATTTAAAAAAGTATTCAATGCTATAGAAACTCAGACCTGCTGAGAAACCAAACATCTGGAATAAGATTCTTTTTTTAATAACATAAAAGAAAACTGTAGTGCAAACCAGACTGATGGCTATTTGTCAGATAGCTGCAAGCCTTGTCTTCTCACAATTTACATAGAAAATGTTGAGAGCAATCATGTCTTTTTTTTTTTTTTTTTTTTTTTTTGTCTTTTTGTCTTTTTCTAGGGCCTCACCCACGGCATATGGAGGTTCCCAGGCTAGGGGCCTGGTCAGAGCTGTAGCCGACTGCCTATGCCAGAGCCACAGCAACTGGGGATCCGAGCTGCGTCTGCAACCTACACTACAGCTCAGAGCAACACTGGATCCTTAACCCACTGAGCG…	G	7	WXP4,WXP6,XP1,XP2,XP3,XP4,XP5,LW2,LW4,LW5,LA2,DU7	-	-	intergenic_variant	MODIFIER	-	-	-	2	5	5	12
sv_00515	1	30059808	30060177	369	DEL	TGGCATTATGTGAGGGCATTAGTCAAATGCTCATGGAGCTGGCCCTGCCCCTGAAGCCATATTCCCCTTTGCTGAAAATCACTTGGTCATAAACCAGTATAGTGTGTTCATCAATGAGTTGGTCATGGAAACCATTTCTGTAACGTCACAGAGATTTTCTTCTGGTTTATTTATTCATCCATTCATTCCTTCACAGATTTCTTGAACACCTGCTAGATTCTAGGTCTTGGAGTAACAGTTACGAGCAGGATGAAGAAGACAGCAGTCAACATCTCTACCTACATGGGCCTCATTGTCCATTAGGAGAAACTGAACTTGAAGACATAACAAAAATTGTGGAAAGGGTGGTGATGGAAATAAACTAAGGCGA	T	18	WXP5,WXP7,XP1,XP2,XP3,XP4,XP6,XP7,LW3,LW4,LW5,LA2,LA5,LA6,DU3,DU7	ENSSSCG00000047444	ENSSSCT00000089989.1	3_prime_UTR_variant,feature_truncation	MODIFIER	-	protein_coding	EXON=1/1,STRAND=1	2	6	8	16
sv_00516	1	30107234	30107554	320	DEL	AAGAAATCCTATTCTTTTTTTTTTTTTTTTTTTTTTTTGCCTTTTGTTGTTGTGTTGTTGTTATTGTTGTTGTTGTTGTTGCTATTTCTTGGGCCGCTCCCGCGGCATATGGAGGTTCCCAGGCTAAGGGTTGAATCGGAGCTGTAGCCACCGGCCTACGCCAGAGCCACAGCAACGCAGGATCTGAGCCGCGTCTGCAACCTACACCACAGCTCACGGCAACGCCGGATCGTTAACCCACTGAGCAAGGGCAGGGACCGAACCCGCAACCTCATGGTTCCTAGTCGGATTCGTTAACCACTGCGCCACGACGGGAACTCC	A	11	WXP4,WXP7,XP2,XP5,XP6,XP7,LW4,DU7	-	-	intergenic_variant	MODIFIER	-	-	-	2	4	2	8
sv_00517	1	30108233	30108569	336	DEL	AATTGGAGGTGAATCATTGCTTTACAAAAACATTTTTCTCTTAATGAAAAGTTTTATCATAGAATTTAAAATAGACAAATTTCTTCTGGAGTATTTAAAGTAGCATTCAATTTTTATAAGTTAACTTACTAATTATCAATAGAATATAACTGAAATTAGGGAGGGAAAGGTTGAAATCAAAACACTAAGGAAATAGCTCATGTATGAGTACTGGATATTCAGGAAATGCCATATATATTATTTTATTCAATCTTCTTAATATACCTGTAACCAAGGCATTGTTGGCACATTTTACAGATGATAAACTGAAAATAAGTGAGCTTAACTAACTTAAGCT	A	14	LW1,LW2,LW4,LW5,LW6,LW7,LA1,LA6,LA7,DU1,DU3,DU4,DU5,DU6	-	-	intergenic_variant	MODIFIER	-	-	-	0	0	14	14
sv_00518	1	30164519	30165006	487	DEL	CTTCGCAGCCACCCGAGCAACTGATGTTGAATTCTTAACCCACCGAGCCACAGTGGCTGGAATTCTTAAAAGACAAGGTCTAGCAGCAGGGGCTGGCATGCCTCTTCTCTTTTGCTGTCGAAAGTCAGCACTAGGCTGAGGAAGCCAGGGCAGAGGGTATCCAGGCCTTGGACTCTTGGGTAGAGACTTAGCCAGAATTTTCTATGGTATAGTCATGTTTGCCTTTATAAAGTCAACCAAGCAGCACCTACTTGTGCTACTGTCATCTGAGTGGCCCCATTTATGCTAATGGAAATAGTCACAATGCAAAAAAAACAAAAAAAACAAAAAAAAAACAGGGTGAAAATTTTTTTTAAGGTAAGAACATGATCAGTCAGCTTTGGTCAAAGAGCAAGAAAT…	C	9	XP7,LW5,LA5,DU1,DU6	-	-	intergenic_variant	MODIFIER	-	-	-	0	1	4	5
sv_00519	1	30197458	30197742	284	DEL	TCTCTCCTTCATTCTTTTTTTTTTTTTTTTTTTTTTTGTCTTTTTGCTATTTCTTGGGCCGCTCCCGCGGTATATGGAGGTTCCCAGGCTAGGGGTCGAACCGGAGCTGTAGCCACCGGCCTACGCCAGAGCCACAGCAACACAGGATCCGAGCCGCGTCTGCAACCTACACCACAGCTCACGGCAACGCCGGATCCTTAACCCACTGAGCAAGGCCAGGGACCGAACCCGCAACCTCATGGTTCCTAGTCGGATTCGTTAACCACTGCACCATGACGGGAACTC	T	10	WXP2,WXP6,XP1,XP2,XP3,XP6,XP7	-	-	intergenic_variant	MODIFIER	-	-	-	2	5	0	7
sv_00520	1	30284111	30284391	280	DEL	TTTTTTTTTTTTTTTTTTTTTTTTTTTTTTTTTTTTTTTTTTTTTTTTTGTCTTTTTGCTAATTTCTTTGGCGCTCCGCGCACATGAGGCTCCAGCAGGGTCGAATCGAGCTGTAGCCACGCCTACGCCAGACCACAGCAACGTGGATCCGAGCCGAGTCTGCAACCTACACCACAGCCACGCAACGCCAGATCGTTAACCACTGAGCAAGGCAGGACCGAACCGCAACCCATGTTCCTAGTCGGATCGCCAACCACTGCGCCACGACGGGAACTCCGAAA	T	13	WXP1,WXP5,WXP6,XP1,XP3,XP4,XP5,XP6,LA4,LA5,DU1	ENSSSCG00000034139	ENSSSCT00000036887.2	intron_variant,feature_truncation	MODIFIER	EYA4	protein_coding	INTRON=15/20,STRAND=-1	3	5	3	11
sv_00521	1	30361358	30361664	306	DEL	TAAAAAGTCTCATGTAGGAGTTCCCGTCGTGGCGCAGTGGTTAACGAATCCGACTAGGAACCATGAGGTTGCGGGTTCGGTCCCTGCCCTTGCTCAGTGGGTTAATGATCCAGCGTTGCCGTGAGCTGTGGTGTAGGTTGCAGACGCGGCTCGGATCCTGCGTTGCTGTGGCTCTGGCGTAGGCCGGTGGCTACAGCTCCGATTCAACCCCTTGCCTGGGAACCTCCATATGCCGCGGGAGCGGCCCAAGAAATAGCAACAACAACAACAACAACAACAAAAGACAAAAAGACAAAAAAAAAAAAAA	T	15	WXP2,WXP4,WXP5,WXP6,WXP7,XP1,XP2,XP3,XP4,XP5	ENSSSCG00000034139	ENSSSCT00000036887.2	intron_variant,feature_truncation	MODIFIER	EYA4	protein_coding	INTRON=4/20,STRAND=-1	5	5	0	10
sv_00522	1	30431287	30431564	277	DEL	TAAATGACACAAACTTGGAGTTCCTGTTGTGGCGCAGTGGTTAACGAATCCGACTAGGAACCATGAGATTGCGGGTTCGGTCCCTGCCCTTGCTCAGTGGGTTAACGATCCGGTGTTGCAGTGAGCTGTGGTGTAGGTTGCAGACACGGCTCGGATCCTGTGTTGCTGTGGCTCTGGTGTAGGCCAGTGGCTACAGCTCCAATTCGACCCCTAGCCTGGGAACCTCCATATGCCATGGAGTGGCCCAAAGAAATAGCAAAAAGACAAAAAAAAAAAAA	T	11	WXP1,WXP5,WXP7,XP2,XP5,XP7	ENSSSCG00000034139	ENSSSCT00000036887.2	intron_variant,feature_truncation	MODIFIER	EYA4	protein_coding	INTRON=3/20,STRAND=-1	3	3	0	6
sv_00523	1	30507301	30507577	276	DEL	GAAAGATGTTGAGGAGTTCCCGTCATGGCGCAGTGGTTAACGAATCGACTAGGCACCATGAGGTTGCGGGTTCGGTCCTGCTTGTCAGTGGTTAGGATCGGCGTTGCGTGAGCTGTGGGTAGGTTGCAGACGCGGCTCGGATCTGGTTGCTGTGGCTCTGGCGTAGGCTGGTGGTAAGCTCTGATTAGACCCTGCCTGGAACTCCATATGCGGGAGCGGCCAAGAAATAGCAACAACAACAAAAAAAAAAAAAAAGACAAAAAAAAAAAAAAAAAAA	G	10	WXP1,WXP7,XP3,XP4,XP5,XP6,XP7,LA1,LA3,LA5,DU1,DU2,DU4,DU6,DU7	ENSSSCG00000034139	ENSSSCT00000036887.2	intron_variant,feature_truncation	MODIFIER	EYA4	protein_coding	INTRON=2/20,STRAND=-1	2	5	8	15
sv_00524	1	30558712	30558799	87	DUP:TANDEM	AGTAAATTACAACTTATTATTAAAGTACAAAATGAAAACCTAGAAGTATATTAAAGACTGTACTTAAGAATTCAAATGGAATAGACTG	AGTAAATTACAACTTATTATTAAAGTACAAAATGAAAACCTAGAAGTATATTAAAGACTGTACTTAAGAATTCAAATGGAATAGACTGTGTAAATTACAACTTATTATTAAAGTACAAAATGAAAACCTAGAAGTATATTAAAGACTGTACTTAAGAATTCAAATGGAATAGACTG	16	WXP5,LW7,LA6,DU1,DU4	ENSSSCG00000034139	ENSSSCT00000058643.2	intron_variant	MODIFIER	EYA4	protein_coding	INTRON=1/21,STRAND=-1	1	0	4	5
sv_00525	1	30558712	30558712	88	INS	A	AGTAAATTACAACTTATTATTAAAGTACAAAATGAAAACCTAGAAGTATATTAAAGACTGTACTTAAGAATTCAAATGGAATAGACTGT	12	WXP1,WXP5,XP2,XP4,XP5,LW4,DU5	ENSSSCG00000034139	ENSSSCT00000058643.2	intron_variant,feature_elongation	MODIFIER	EYA4	protein_coding	INTRON=1/21,STRAND=-1	2	3	2	7
sv_00526	1	30657137	30657759	622	DEL	GACCAGATGTAATTTTTAGCTGCTTATATTATATATTTAATTTTTTTTTCTTTCTTTTTAGGGCCTCACTCATGGCATGTGGAGGTTTCCAGGCTAGGGGTTGAATCAGAGCTGTAGCTGGGGGCCTACACCACAGCCACAGCCACAGCAATGCAGGATCCAAGCTGCATCTGTGACCTACATCACAGCTCACAGTAATGCCATATGCTTAACCCACTGAACAAGGCCAGGGATCGAACCTGCGTCCTCATGGATGTTAGTCAGATTTGTTAACCACTGAGCCGTGACAGGAACTCCCCAATTTTATTCTTAATAAATCTAATCTTTTTACATTCCTTTTAAAATAAACTGTTTCTCCTAATTCAAAAAAATACATTTTATTTTTTGAACCCTTTTAGG…	G	13	LA7,DU1,DU3,DU4,DU5	-	-	intergenic_variant	MODIFIER	-	-	-	0	0	5	5
sv_00527	1	30673300	30673459	159	DEL	TGTGGTGTAGGCCAGCAGCTGCAACTCAGGTTCAATGCCTAGCCTGGGAACCTCCATATGCCCCAGGTGTGGCCCTAAAAAATTAATTAATTAATTAATCTATTTATTGCTAACAAAAATGTAATTGAAGCCTCAGTGTTGACTGATTAAATTATAGTCA	T	19	WXP6,WXP7,XP1,LW1,LW3,LW7,LA3,LA6,LA7,DU5	-	-	intergenic_variant	MODIFIER	-	-	-	2	1	7	10
sv_00528	1	30855197	30855398	201	DEL	TAAAGTTATTAGATTGTTGTAGCGTGGTTAACGAATGACTAGAACAGAGGTTGGGGTTGTTGTCTTGCTCAGTGGTTACGATGGCGTTGCGTGAGCTGTGTTAGTGGACGGCTCGATCTGCGTTGCTGTGTTGTGTAGGGTGCTACAGCTCGATTGGACTAGTGGAATCATATGTGCGAGGCCAAAAAAAAAAAAAAAAAAA	T	8	XP3,XP6,LA1,LA2,LA4,LA5	ENSSSCG00000043813	ENSSSCT00000072980.1	intron_variant,non_coding_transcript_variant,feature_truncation	MODIFIER	-	lncRNA	INTRON=2/2,STRAND=-1	0	2	4	6
sv_00529	1	30960829	30961138	309	DEL	GGATCTTTCCATATTTATTTTTTTTTTTTGTCTTTTTGTCTTTTTGTTGTTGTTGTTGTTGTTGTTGTTGCTATTTCTTGGGCCGCTCCTGCGGCATATGGAGGTTCCCAGGCTAGGGGTCCAATCGGAGCTGTAGCCACCGGCCTACGCCAGAGCCACAGCAACGCGGGATCCGAGCCACGTCTGCAACCTACACCACAGCTCACGGCAACGCCGGATCGTTAACCCACCGAGCAAGGGCAGGGATCGAACCCGCAACCTCATGGTTCCTAGTCGGATTCGTTAACCACTGCGCCACGACGGGAACTCC	G	8	WXP1,WXP6,XP1,XP3	ENSSSCG00000004179	ENSSSCT00000004618.4	upstream_gene_variant	MODIFIER	-	protein_coding	DISTANCE=426,STRAND=1	2	2	0	4
sv_00530	1	30995679	30995736	57	DEL	AACTGGTTTTCTATAAATCTTCTTCTGCAAATATGATTCTCTGAAAATCTTTTTTCCT	A	13	XP2,XP4,DU7	ENSSSCG00000004180	ENSSSCT00000004619.4	downstream_gene_variant	MODIFIER	-	protein_coding	DISTANCE=2422,STRAND=1	0	2	1	3
sv_00531	1	31071800	31072259	459	DEL	ATCTGTGACCTACACCACAGCTCACAGTAATGCTGGATCCCTCACCCACTGAGTGAGGCCAGAGATTGAACCTGTAACCTGATGGTTACTAGTCGGGTTTGTTAACCACTGAGTCACTACAGGAACTCCTAATTTTTTTCTTTAAAAATGTCACTGCTTAAATTTGAGAAAAAAAAGTGGGAAAGCTCCTTTGACTATATACTGGCTAAGGACACTGGCTGGGGGGATGGGGCGGGGGCGCGGATTATGGAAATAGAAACCCTCCCTTTTCCCACTCCGTCTTCTCCTCAACCCTCCATGTTTTCTGCTGTGTTTCAGAGGCCTTGAAAATGACTTTCAAAGGTCTCCAGACATCCTCCTGTCTTTTCTTCACCCTCCCTTCTTGGAGTAGGTTTTTTT…	A	3	XP2,XP5	ENSSSCG00000004183	ENSSSCT00000004622.4	upstream_gene_variant	MODIFIER	TAAR2	protein_coding	DISTANCE=1395,STRAND=1	0	2	0	2
sv_00532	1	31099423	31100888	1465	DEL	GCAACTTTCAGATTACAGCTTTCGGCTGATGTAGCGAACTCCCTGAGGAGAGAGGTTAGGTAATGCCTCAATAGTGTAAGCGCTTTAGAGAAAAGTTCTGTTGTGTAGAAATATTATTCACTGTTCTATATATTAACAGATTGGAAATTTTTTAATGTAAATCATGAATAGAAGGACTCTTTCATCCCTAATTAGAACCTGTTTACATGGGACTGCAGCAATTTATTCATCAACCTTATTTTTCATAACAATAACCCGAAGTAATTGATAAGTTTCGTGGAGTTCCCCTCATGGCTCAGTGGATAATGAACCTGACTAGCATCCATGAGGACGCAGGTTCAAGCCCTGGCCTCACTCAGTGGGTTAAGGATCTGGTGTTGCCGTGAGCTGTGGTATAGG…	G	13	XP3,XP6	ENSSSCG00000004185	ENSSSCT00000004624.4	upstream_gene_variant	MODIFIER	-	pseudogene	DISTANCE=3254,STRAND=1	0	2	0	2
sv_00533	1	31120470	31120629	159	DEL	AAGAGAGATAAGGAGATCCTGCTGAATAGCATTGAGAATTTTGTCTAGATACTCATGTTGCAACAGAAGAAAGGGTGGGGGAAAAATGTAATTGTAATGTATACATGTAAAGATAACCTGACCCCCTTGCTGTACAGTGGGAAAATAAAAAAAAAAAAAG	A	15	WXP5,XP2,XP5,LW4,LW5,LW6,LW7,LA5,LA7,DU2,DU3,DU5,DU6,DU7	ENSSSCG00000037590	ENSSSCT00000038294.2	downstream_gene_variant	MODIFIER	-	protein_coding	DISTANCE=3907,STRAND=1	1	2	11	14
sv_00534	1	31278844	31279143	299	DEL	TCTCTCTTTACAGATTTTTTTTTTTTTTTTTTTTTTTTTTTTTTTTTTTTTTGTTGTTGTTGTTGTTATTGTTGCTATTTCTTGGCGCTCCACGGCATATGGAGTTCCAGGCTAGGTTGAATTGAGCTGTAGCCACCGCCTACGCCAGAGCAACAGCAACGCAGGATCCGAGCCGCGTCTGCAACCTGCACCACAGCTCACGCAACGCCGATCGTTAACCCACTGAGCAAGGCAGGACCGAACCCGCAACCTCATGGTTCCTAGTCGGATTCGTTAACCACTGCGCCACGACGGGAACCC	T	14	WXP3,WXP4,WXP5,WXP6,WXP7,XP1,XP2,XP3,XP4,XP5,XP6,XP7,LW1,LW2,LW4,LW7,LA1,LA2,LA5,LA7,DU7	ENSSSCG00000004191	ENSSSCT00000004630.4	upstream_gene_variant	MODIFIER	MOXD1	protein_coding	DISTANCE=3363,STRAND=1	5	7	9	21
sv_00535	1	31319042	31319319	277	DEL	AAGAAAGTATATTTTTTTTTTTTTTTTTTTTTTTTTTTTTGTTATTGTTGCTATCGCTTGTTCTTGGCGCTCCGGCATATGGAGGTTCCAGGCTAGGGTGAATCGGAGCTGTAGCCACGCCTACGCCAGAGCCCAGCACGCAGGATCCGAGCCGCGTCTGCCCTACACCACAGCTCACGCAACGCAGGATCGTACCCACTGAGCAGGCAGGGACCGAACCCGCAACCTCATGGTTCCTAGTCGGATTCGTTAACCACTGCGCCACGACGGGAACTCCC	A	14	WXP1,WXP3,WXP5,WXP7,XP1,XP3,XP4,XP6,LW4,LW5,LW6,LW7,LA6,DU3,DU4,DU5,DU7	ENSSSCG00000004191	ENSSSCT00000004630.4	intron_variant,feature_truncation	MODIFIER	MOXD1	protein_coding	INTRON=5/13,STRAND=1	4	4	9	17
sv_00536	1	31395707	31396569	862	DEL	TTTGCCATGAGCTGTGGTGTAGGTCCCAGACACGGGGGCTGTGGTGTAGGCCAGCAGCTACAGCTCGGATTCAACCCCTAGCCTGGGAACTTCCTTATGCCACAATTGTGGCCCTAAAAAAAAAGCAAAAAAAAAAAAAGTATGGGAGTATAAATACTGTCAAAGGTCTAATTTATTTTCTTGAGCAATCTCAGTTTCAATGGTGGAAACATTTTCTTTATACTTTGGGAATGCTTAAAGTCACTTCTAGAACACACAATATTCTTCAAGTCTGTAAACCAGGTGCAGTACTCTTATCTAAGGAGATAAAAATATCTGATTCACAGAGGGAGAGGGGATGGAGGAGCAAAATGAAAAAAGACACAAACTCTGATTCTCATTACATTCCTGTGAAAGAGG…	T	8	WXP4,WXP5,XP2	-	-	intergenic_variant	MODIFIER	-	-	-	2	1	0	3
sv_00537	1	31399360	31399653	293	DEL	ATTAATATGCTTCTTTTTTTTTTTTTTTTTTGTCTTTTTGCTATTTCTTGGGCCACTCCCGCGGCATATGGAGGTTCCCAGGCTAGGGGTCCAATCGGAGCTGTAGCCACCGGCCTACGCCAGAGCCACAGCAACGCGGGATCCGAGCCGCGTCTGCAACCTACACCACAGCTCACGGCAATGCCGCATCGTTAACCCACTGAGCAAGGGCAGGGGTCGAACCCGCAACCTCATGGTTCTTAGTCGGATTCGTTAACCACTGCGCCACGACGGGAACTCCATTTTTTTTTTTTT	A	10	WXP3,WXP4,WXP7,XP4,XP5	-	-	intergenic_variant	MODIFIER	-	-	-	3	2	0	5
sv_00538	1	31513216	31513299	83	DEL	GAAGGAAGGAAGGAAGGAAGGAAAGGGGAGGGGAGGAGAGGGAAGGGGAGGGGAGGGGAGGGGAAGGAAGAGGAGAGGAAAGGA	G	8	LW6,LW7	-	-	intergenic_variant	MODIFIER	-	-	-	0	0	2	2
sv_00539	1	31572045	31572142	97	DEL	GTTAACTTTGTTTTTTTTTTTTGTTTTTGTTTTTTGTTTTTTTATTTTCCCACTGTACAGCAAGGGGGTCAGGTTATCCTTACATGTATACATTGCAA	G	12	WXP4,WXP5,LW4,LW5,LW6,LW7,LA7,DU3,DU4,DU5	-	-	intergenic_variant	MODIFIER	-	-	-	2	0	8	10
sv_00540	1	31707688	31708182	494	DEL	CCTGTGGTGCTGCAAGACATGTTTCCTTGAAAACTCCATCTTGTCCTTCTTTACTTTATCCCATCTTCTTGTCTTACTTTATCCCATCTTCCTTCTTGGAGAAACAGTCACAGTGCTGGTAAATGACTTAAGCTTAAGAGCAAAGACCTAAAGGCATAAGTGACTTAAGTTTAAGAACTGTTATGTGCCTAGAGGTCAGAGTAAGAGCTTAACCCTTTACCACCTAAGTGGCTTTCTAAACAAACCCTGTATCATCCACCCATAGCCACTCCTCACTTAATCTCACAATAAAAGCAGTGTGGTTTCTTCAGGCAGGATGCTCTTGGTCCCTGAGATCTGGAGTTCCCCGGCGCTCTTGGTCCCTGAGACCTTGAGTCCCTGGCTCCCACCTTTACTTAA…	C	6	XP3,XP4,XP6	-	-	intergenic_variant	MODIFIER	-	-	-	0	3	0	3
sv_00541	1	31736315	31736661	346	DEL	TAACACTGTCTTTATTTTTTTTTTTTTTTTTTTTTTTTTTTTGTCTTTTGTCTTTTGTCTTTTGTCTTTTGGTCTGTTGTTGTTGTTGTTGCTGTTGTTGCCATTTCTTGGGCCGCTCCCGCGGCACATGGAGGCTCCCAGGCTAGGGGTCGAATCGGAGCTGTAGCCACCAGCCTACGCCAGAGCCACAGCAACGCGGGATCCGAGCCGCGTCTGCGACCTACACCACAGCTCACGGCAACGCCGGATCGTTAACCCACTGAGCAAGGGCAGGGACCGAACCCGCGACCTCATGGTTCCTAGTCGGATTCGTTAACCACTGCGCCACGACGGGAACTCC	T	11	WXP4,WXP6,WXP7,XP1,XP3,XP4,XP5,XP6,LA5,DU7	ENSSSCG00000004193	ENSSSCT00000037881.2	intron_variant,feature_truncation	MODIFIER	ENPP1	protein_coding	INTRON=19/24,STRAND=-1	3	5	2	10
sv_00542	1	31838222	31838518	296	DEL	TAAAAAAATTTAAACATTGGAGTTCCCGTCGTGGCGCAGTGGTTAACGAATCCGACTAGGAACCATGAGGTTGCGGGTTTGGTCCCTGCCCTTGCTCAGTGGGTTAACGATCCGGCGTTGCCGTGAGCTGTGGTGTAGGTTGCAGACACGGCTCGGATCCCGCGTTGCTATGGCTCTGGCATAGGCCGGTGGCTACGGCTCTGATTCGACCCCTAGCCTGGGAACCTCCATATGCCGCGGGAGCGGCCCAAAGAAATGGCAAAAAAAAAAAAAAAAAAAAAAAAAAAAAAAAGACAA	T	16	WXP4,WXP5,WXP6,WXP7,XP3,XP4,XP5,XP6,XP7	-	-	intergenic_variant	MODIFIER	-	-	-	4	5	0	9
sv_00543	1	32003329	32003507	178	DEL	AGCTGTGGACGACGGACATTTAGGTTGTTTCCATGTCTTGGCTATTGTAAATGGTGTTGCAGTGAACATACGGGTGCATGTATCTTTTTCAAGGAAAGTTTTGTCTGGATATGTGCTCCAAGAGTGGGATTGCTGGGTAATACAGTAGTTCTATATTTAGTTTTCTGAGGTACTTCCAT	A	7	DU1,DU6	ENSSSCG00000004195	ENSSSCT00000004636.4	downstream_gene_variant	MODIFIER	ARG1	protein_coding	DISTANCE=2544,STRAND=-1	0	0	2	2
sv_00544	1	32103725	32104004	279	DEL	CAAATTATGTCTACATGGGAGTTCCCGTCGTGGCGCAGTGGTTAACGAATCCGACTAAGAACCATGAGGTTGCGGGTTCGGTCCCTGCCCTTGCTCAGTGGGTTAACGATCCGGCGTTGCCATGAGCTGTGGTGTAGGTTGCAGACTCGGCTCGGATCCCGCGTTGCTGTGGCTCTGGTGTAGGCCAATAGCTACAGCTCCGATTCAACCCCTAGCCTGGGAACCTCCATATGCCGCGGGAGCGGCCCAAAGAAATGGCAAAAAGACAAAAAAAAAAAAA	C	15	WXP2,WXP4,WXP5,WXP6,WXP7,XP1,XP2,XP6	-	-	intergenic_variant	MODIFIER	-	-	-	5	3	0	8
sv_00545	1	32152108	32152415	307	DEL	ATCCATAGAGTCATTTTTTTTAATCTTTTTTTTTTTTTTTTTTTTTTTTGTCTTTTTGTCTTTTGTTGTTGCTATTTCTTGGGCCGCTCCCGCGGCACATGGAGGTTCCCAGGCTAGGGGTCCAATCGGAGCTGTAGCCACCGGCCTACGCCAGGGCCACAGCAATGCAGGATCCGAGCCGCGTCTGCGACCTACACCACAGCTCACGGCAACGCCGGATCGTTAACCCACTGAGCAAGGCCAGGGACCGAACCCGCAACCTCATGGTTCCCAGTCGGATTCGTTAACCACTGCGCCACGACGGGAAC	A	13	WXP2,WXP4,WXP6,WXP7,XP2,XP3,XP6,LW1,LW2,LW3,LW4,LA1,LA2,LA3,LA5,LA6,LA7,DU1,DU2,DU3,DU4,DU5	-	-	intergenic_variant	MODIFIER	-	-	-	4	3	15	22
sv_00546	1	32183516	32183667	151	DEL	AGATATACATATACCTCATTATTTTACTGTACCATACAGTATTTTATAGACTAAAATTCCATCATTTAAAAATTCTGTAGTCCTCTCGTGGGAGTGTTAAGAATCCCACATTGTCACTGCAGCAGTTTGGGTCACTGCTGTGGTGCAGGTTT	A	7	WXP3,WXP4,WXP5,XP1,XP7	-	-	intergenic_variant	MODIFIER	-	-	-	3	2	0	5
sv_00547	1	32190228	32190318	90	DEL	TGCTCCCCTTTCTTCAGTTAAAATGTTTTTCTTGGGAATTTAAGTATGATGAGTACATGCAACTGGAGTTGGGGAAAGTATGACTTCTACA	T	8	LW6,LW7,LA6,LA7	-	-	intergenic_variant	MODIFIER	-	-	-	0	0	4	4
sv_00548	1	32195451	32195733	282	DEL	ACCCTGCTGTTTTATTTATTTTATTTATTTATTTATTTTTTTGCTATTTCTTGGGCCGCTCCTGCGCCATATGGAGGTTCCCAGGCTAGGGGTCTAATCGGAGCTGTGGCCACCGGCCTACGCCAGAGCCACAGCAACGCGGGATCCGAGCCGCCTCTGCAACCTACACCACAGCTCATGGCAACGCCGGATCGTTAACCCACTGAGCAAGGGCAGGGACCGAACCCGCAACCTCATGGTTCCTAGTCGGATTCGTCAACCACTGCGCCACGACGGGAACTCC	A	7	WXP2,WXP3,WXP4,WXP7,XP3,LA6,DU1,DU7	-	-	intergenic_variant	MODIFIER	-	-	-	4	1	3	8
sv_00549	1	32256128	32256435	307	DEL	TAAGAATAAAATACAGGGAGTTCCCGTCGTGGCGCAGTGGTTAACGAATCCGACTAGGAACCATGAGGTTGTGGGTTCGCTCCCTGCCCTTGCTCAGTGGGTTAACGATCCAGCGTTGCCGTGAGCTGTGGTGTAGGTTGCAGACGCGGCTCGGATCCCACGTTGCTGTGGCTCTGGCGTAGGCTGGTGGCTACAGCTCCGATTCAACCCCTAGCCTGGGAACCTCCATATGCCGCGGGAGCGGCCCAAGAAATAGCAACAACAACAACAACAAAAGACAAAAGACAAAAAAAAAAAAAAAAAAAGAA	T	9	WXP3,WXP5,XP7,LW6,DU2,DU3,DU5	ENSSSCG00000036790	ENSSSCT00000037551.2	intron_variant,feature_truncation	MODIFIER	AKAP7	protein_coding	INTRON=7/9,STRAND=-1	2	1	4	7
sv_00550	1	32407447	32407726	279	DEL	TTTACAAAAAAAAAAAAAAAAAAAAAAAGGAGTTCCGATGTGGCGCAGTGGTTAACGAATCGACTAGAACCATGAGGTTGGCGTTCGATCCTGCTTGCTCAGTGGGTTAACGATCCGGCGTTGCGTGAGCTGTGTGTAGGTTGCAGACGCGCTCGGATCCATGTTGCTGTGGCTCTGGATAGACTGGCAGCTACAGCTCCGATTAGACCCTAGCTGGAAACTCCATATGCCGCGGGAGCGCCAAGAAACGGCAAAAAGACAAAAAAAAAAAAAAAAAAAA	T	11	LW6,LW7,LA6,LA7,DU1,DU4	-	-	intergenic_variant	MODIFIER	-	-	-	0	0	6	6
sv_00551	1	32451088	32451384	296	DEL	ATTGTAGTTTTTTTTTTTTTTTTGTGTTTTTGTCTTTTGTTGTTGTTGTTGTTGCTATTTCTTGGGCCGCTCCCGCGGCATATGGAGGTTCCCAGGCTAAGGGTTGAATCGGAGCTGTAGCCACCGGCCTACGCCAGAGCCACAGCAACGCGGGATCCGAGCCGCGTCTGCAACCTACACCACAGCTCACGGCAACTCCGGATCGTTAACCCACTGAGCAAGGGCAGGGACCGAACCCGCAACCTCATGGTTCCTAGTCGAATTCGTTAACCACTGCGCCACGACGGGAACTCCTCG	A	11	WXP2,WXP3,WXP4,WXP5,WXP6,WXP7,XP1,XP2,XP3,XP4,XP5,XP6,XP7,LA5	ENSSSCG00000004199	ENSSSCT00000004640.3	intron_variant,feature_truncation	MODIFIER	EPB41L2	protein_coding	INTRON=1/19,STRAND=1	6	7	1	14
sv_00552	1	32489558	32489877	319	DEL	GCCAGTCAGATAGTCTTTTTTATTTATTTATTTATTTATTTATTTATTTTGTCTTTTTTGTCTTTTGTTGTTGTTGTTGTTGCTATCTCTTGGGCCGCTTCCGCGGCATATGGAGGTTCCCAGGCCAGGGGTTGAATCGGAGCTGTAGCCACTGGCCTACGCCAGAGCCACAGCAACGCGGGATCCGAGCCGCATCTGCAACCTACACCACAGCTCACGGCAACGCCGGATCGTTAACCCACTGAGCAAGGGCAGGGACCGAACCCGCAACCTCATGGTTCCTAGTCGGATTCGTTAACCACTGCGCCACGACGGGAACT	G	11	WXP3,WXP5,WXP7,XP1,XP3,XP6	ENSSSCG00000004199	ENSSSCT00000004640.3	intron_variant,feature_truncation	MODIFIER	EPB41L2	protein_coding	INTRON=1/19,STRAND=1	3	3	0	6
sv_00553	1	32558865	32559172	307	DEL	ATGGAAATAGTTTTTTTTTTTTTTTTTTTGTCTTTTTGTCTTTTTGTCTTTTGTTGTTGTTGTTGCTATTTCTTGGGCCGCTCCCGCGGCATATGGAGGTTCCCAGGCTAGGGGTTGAATCGGAGCTGTAGCCACCAGCCTACACCAGAGCCACAGCAACGCGGGATCCGAGCCGCATCTGCAACCTACACCACAGCTCACGGCAACGCCGGATCGTTAACCCACTGAGCAAGGGCAGGGACCGAACCCTCAACCTCATGGTTCCTAGTCGGATTCGTTAACCACTGCACCACGACGGGAACTCCCCC	A	17	WXP2,WXP4,XP2,XP4,XP7,DU7	ENSSSCG00000004199	ENSSSCT00000004640.3	intron_variant,feature_truncation	MODIFIER	EPB41L2	protein_coding	INTRON=4/19,STRAND=1	2	3	1	6
sv_00554	1	32696482	32696792	310	DEL	TCTAATTTTTTTTTTTTTTTTTTTTTTTGTCTTTTGTCTTTTTGTCTGTTGTTGTTGTTGTTGCTGTTGTTGCTATTTCTTGGGCCGATCCCGCGGCATATGGAGGTTCCCAGGCTAGGGGTTGAATCGGAGCTGTAGCCACCGGCCTACGCCAGAGCCACAGCAACGCGGGATCCGAGCCGAGTCTGCGACCTACACCACAGCTCACGGCAACGCCGGATCCTTAACCCACTGAGCAAGGCCAGGGATTGAACCCGCAACCTCATGGTTCCTAGTCGGATTCGTTAACCACTGGGCCACGACGGGAACTC	T	14	WXP5,WXP6,WXP7,XP1,XP3,XP4,XP6,LW6,LW7,LA4,DU7	-	-	intergenic_variant	MODIFIER	-	-	-	3	4	4	11
sv_00555	1	32762895	32763172	277	DEL	TTAAAAGCTTGTGGGAGTTCCCGTCGTGGCGAGTGGAACGATCGACTAGGAACATGAGGTGCGGGTCGGTCCTGCCTGCTCAGTGGGTAATGATCGGCGTGCGTGAGCTGTGGTGTAGGTGCAGACACGGCTCGGATCCACGTTGCTGTGGTCTGGCGTAGGCCAGTAGCTACAGCTCGATAGATAGCTGGAACTCATATGCCGGGAGCGCCAAGAAATAGCAAAAAAAAAAAAAAAAAAAAAAAAAAAAAAAAAAAAAAAAAAAAAAAAAAAAAAAA	T	10	LW1,LW2,LW3,LW4,LW5,LW6,LA5,LA7,DU3,DU4,DU5,DU6	-	-	intergenic_variant	MODIFIER	-	-	-	0	0	12	12
sv_00556	1	32829015	32829015	92	INS	C	CCCACACAGCGGGCATGTGGGTGTGTCTGTGTGTGTGCATGCTCTTGCATCTACACGATTTACTTCCACCGTTGTCACGCAGTACTGAGTTTT	3	WXP3,WXP5,XP5	-	-	intergenic_variant	MODIFIER	-	-	-	2	1	0	3
sv_00557	1	32988998	32990193	1195	DEL	TATATATGTATGACTGGGTTACTGTGCTATATAGCAGAAATTGACACAACACTGTAAACCAACTATACTTTAATAAAAATAAAATAAAATAATCAAATGTGTTCATCTATCTGCAAAAAAGATGATACCTTTTCACTAATGACATTTACAAATACTATAATACTTCCTTACACACACATAGCACAGTAACTCTTTTACACATCAGATTGAAGTTTCCTTTTAAATAAGGGCATGACCGCAGACACCCTCCAAGAATCATCTTGTGGGCAGCAGGGAAGGAGGGGTCTAATAACACTTAAGTAGAGAAAAAGAGATCTCATGAGCAGAAAAGGGGTGCCACAATTACTGTCATTATTTAGTAACCTAAGAAAGAGGGGTTCAAAGGAGTCCCAAAGTCCT…	T	6	XP3,XP6	ENSSSCG00000004201	ENSSSCT00000004642.3	intron_variant,feature_truncation	MODIFIER	TMEM200A	protein_coding	INTRON=1/1,STRAND=-1	0	2	0	2
sv_00558	1	33104063	33104355	292	DEL	ACACGAATTTGGGAGTTCCCGTCGTGGCGCAGTGGTTAACGAATCCAACTAGGAACCATGAGGTTGCGGGTTCGGTCCCTGCCCTTGCTCAGTGGGTTAACGATCTGGCGTTGCCGTGAGCTGTGGTGTAGGTTGCAGACGCGGCTCGGATCCCGCGTTGCTGTGGCTCTGGCGTAGGCCGGTGGCTACAGCTCCGATTGGACCCCTAGCCTGGGAACCTCCATATGCCGCGGGAGCGGCCCAAGAAATAGCAACAACAACAACAACAAAAGACAAAAAAAAAAAAAAAAAAC	A	9	LW4,LW5,LA6,LA7	-	-	intergenic_variant	MODIFIER	-	-	-	0	0	4	4
sv_00559	1	33124140	33124432	292	DEL	TTTACTTTGATTTTTTTTTTTTTTTTTTTTTTTTTTGTCTTTTGTTGTTGTTGCTATTTCTTGGGCCGCTCCCGCGGCATATGGAGGTTCCCAGGCTAGGGGTTGAATCGGAGCTGTAGCCACCGGCCTACGCCAGAGCCACAGCAACGCAGGATCCGAGCCGCGTCTGCAACCTACACCACAGCTCACGGCAGCGCCGGATCGTTAACCCACTGAGCAAGGTCAGGGACCGAACCCGCAACCTCATGGTTCCTAGTCGGATTCGTTAACCACTGCGCCACGACGGGAACTCC	T	18	WXP1,WXP3,WXP4,WXP5,WXP7,XP1,XP3,XP4,XP6,XP7,LW7,LA5,LA7,DU7	-	-	intergenic_variant	MODIFIER	-	-	-	5	5	4	14
sv_00560	1	33155078	33155168	90	DEL	AAGGCAGCGGCCTCAGCCACTGGCTGCCTGGCCCCGGCAGCCCCGACAGTGCAGGGGAAAGCTGCACCTTTGATCAGGAGCTCCTGCAAAT	A	10	WXP2,WXP6,XP2	ENSSSCG00000004202	ENSSSCT00000004643.4	intron_variant,feature_truncation	MODIFIER	SAMD3	protein_coding	INTRON=5/11,STRAND=1	2	1	0	3
sv_00561	1	33158351	33158632	281	DEL	GGATTTTTTTTTTCTTTTTTTTTTTTTGTCTTTTGTTGTTGTTGTTGCTATTTCTTGGGCCGCTCCCGTGGCATATGGAGGTTCCCAGGCTAGGGGTTGAATCTGCCTACGCCAGAGCCACAGCAACGCGGGATCCGAGCCGCGTCTGCAACCTACACCACAGCTCACGGCAACGCCGGATCGTTCACCCACTGAGCAAGGGCAGGGACCGAACCTGCAACCTCATGGTTCCTAGTCGGATTCGTTAACCACTGCGCCACGACGGGAACTCCCCAATGGAAA	G	3	XP1,XP4	ENSSSCG00000004202	ENSSSCT00000004643.4	intron_variant,feature_truncation	MODIFIER	SAMD3	protein_coding	INTRON=5/11,STRAND=1	0	2	0	2
sv_00562	1	33169514	33169809	295	DEL	TAAAGATTCTTTTTTATCGGAGTTCCCGTCGTGGCGCAGTGGTTAACGAATCCGACTAGGAACCATGAGGTTGCGGGTTCGGTCCCTGCCCTTGCTCAGTGGGTTAACGATCCGGCGTTGCTGTGAGCTGTGGTGTAGGTTGCAGACGCGGCTCTGGTCCTGCGTTGCTGTGGCTCTGGCGTAGGCCGGTGGCTACAGCTCTGATTCGACCCCTAGCCTGGGAACCTCCATATGCCGCGGGAGCGGCCCAAGAAATAGCAACAACAACAAAAGACAAAAAGACCAAAAAAAAAAAA	T	9	LW5,LW7,LA6	ENSSSCG00000004202	ENSSSCT00000004643.4	intron_variant,feature_truncation	MODIFIER	SAMD3	protein_coding	INTRON=7/11,STRAND=1	0	0	3	3
sv_00563	1	33221021	33221349	328	DEL	TAAAAAACAAAAAACCGGAGTTCCCGTCGTGGCGCAGTGGTTAACGAATCCGACTAGGAACCATGAGGTTGCGGGTTCGGTCCCTGCCCTTGCTCAGTGGGTTAACGATCCGGCATTGCCGTGAGCTGTGGTGTAGATTGCAGATGCAGCTCGGATCCCGTGTTGCTGTGGCTCTGGCATAGGCCGGTGGCTACAGCTCCGATTCAACCCCTAGCCTGGGAACCTCCATATGCCGCGGGAGCGGCCCAAGAATTAGCAACAACAACAACAACAACAAAAGACAAAAGACAAAAAATAAATAAATAAATAAATAAATAAAAACAAAAAAC	T	10	WXP4,XP2,XP6,XP7,LW6,LA4,LA6	ENSSSCG00000004203	ENSSSCT00000004644.4	intron_variant,feature_truncation	MODIFIER	L3MBTL3	protein_coding	INTRON=17/20,STRAND=-1	1	3	3	7
sv_00564	1	33266976	33267279	303	DEL	ACACATTACATTTTTATTTATTTATTTATTTATTTATTTATTTATTTGTCTTTTTGTCTTTTTGCCATTTCTTGGGCCGCTCCTGCGGCATATGGAGGTTCCCGGGCTAGGGGTCGAATCAGAGCTGTAGCTGCCAGCCTACGCCAGAGCCACAGCAACGCAGGATCCGAGCCGCGTCTGTGACCTACACCACAGCTCACGGCAACGCCGGAACCTTGACCCACTGAGCAAGGGCAGGGATCGAACCCGCAACCTCATGGTTCCTAGTCGGATTCGTTAACCACTGCGCCACGATGGGAACTCC	A	9	XP1,XP6,XP7	ENSSSCG00000004203	ENSSSCT00000004644.4	intron_variant,feature_truncation	MODIFIER	L3MBTL3	protein_coding	INTRON=11/20,STRAND=-1	0	3	0	3
sv_00565	1	33343138	33343437	299	DEL	TTGAAGCGGCTATTTTTTGTCTTTTGTCTTTTTTTGTTGTTGTTGTTGTTGTTATTGTTGCTATTTCTTGGGCCGCTCCCGCGGCATATGGAGGTTCCCAGGCTAGGGGTTGAATTGGACCTGTAGCCACCGGCCTACACCAGGGCCACAGCAACGCGGGATCCGAGCCGCGTCTGCAACCTACACCACAGCTCACGGCAACGCCGGATCGTTAACCCACTGAGCAAGGGCAGGGACCGAACCCGCAACCTCATGGTTCCTAGTCGGATTCGTTAACCACTGCGCCACGACGGGAACTCC	T	12	WXP2,WXP3,WXP5,WXP6,XP3,XP4,XP5,XP6,LW5,LA5,LA6,LA7,DU7	-	-	intergenic_variant	MODIFIER	-	-	-	4	4	5	13
sv_00566	1	33359044	33359330	286	DEL	TTGCATGTTTTTTTGTTTTGTTTTTTTGTGTGTGTGTCTTTTTTACTATTTTTTTTGGGCTACTTCCGTGGCATATGGAGGTTCCCAGGCTAGGGGTCCAATCGGAGCTGTAGCCGCCGGCCTATGCCAGAGCCACAGCAACGCGGGATCCAAGCCGCGTCTGCAACCTACACCACAGCTCACAGCAACGCCGGATCGTCAACCCACTGAGCAGGGGCAGGGACCGAACCCGCAACCTCATGGTTCCTAGTCGGATTCGTTAACCGCTGCGCCACGACGGGAACTCC	T	15	WXP4,WXP5,WXP6,WXP7,XP1,XP2,XP3,XP4,XP5,XP6,XP7,LW1,LW2,LW4,LW5,LW6,LW7,LA1,LA2,LA3,LA4,LA5,LA7,DU1,DU2,DU3,DU4,DU7	-	-	intergenic_variant	MODIFIER	-	-	-	4	7	17	28
sv_00567	1	33389013	33389327	314	DEL	TAGAATGAATATATAGGAGTTCCCGTCGTGGCGCAGTGGTTAACGAATCCGACTAGGAACCATGAGGTTGCGGGTTCGATCCCTGCCCTTGCTCAGTGGGTTAACGATCCGGCGTTGCCGTGAGCTGTGGTGTAGGTTGCAGACGCGGCTCGGATCCCGCGTTGCTGTGGCTCTGGCGTAGGCCGGTGGCTACAGCTCCGATTCAACCCCTAGCCTGGGAACTTCCATATGCCGGGGCAGCGGCCCAAGAAATAGCAACAATAACAACAACAACAACAACAACAAAGACAAAAAAGACAAAAAAAAAAAAAAAAA	T	3	XP6,LW2,LW3,LA2,LA3,LA7,DU5	-	-	intergenic_variant	MODIFIER	-	-	-	0	1	6	7
sv_00568	1	33412026	33412312	286	DEL	TTATAATATTTTTTTTTTTTTTTGTCTTGTTGTTGTTGCTATTTCTTGGGCCGCTCCCGCGGCATATGGAGGTTCCCAGGCTAGGGGTTGAATCGGAGCTGTAGCCACCGGCCTACGCCAGAGCCACAGCAACGCGGGATCCGAGCCGCATCTGCAACCTACACCACAGCTCAGGGCAACGCCGGATTGTTAACCCACTGAGCAAGGGCAGGGACCAAACCCGCAACCTCATGGTTCCTAGTCGGATTCGTTAACCACTGCGCCACGACGGGAACTCCTGTTTATAA	T	11	XP4,XP5,XP6,LW7,LA7	-	-	intergenic_variant	MODIFIER	-	-	-	0	3	2	5
sv_00569	1	33413399	33413540	141	DEL	TATACGTCTCCCCATCCTTCCCAACGCTAAGCTCATACTTGCTGTCACCCCCTCCTTTAGGACTCAAGCAATTGGTCAACTAATAATTTTCCCTTCCCTTTCCAACACCTAGTCTCAGAAAAGGTTCTGAAATTCATTTATC	T	8	WXP2,WXP5,WXP6,WXP7,XP3,XP6,LA6,LA7	-	-	intergenic_variant	MODIFIER	-	-	-	4	2	2	8
sv_00570	1	33458518	33459901	1383	DEL	CCACCATATTTCAGGGACACCAAAGCTGCCACTTGAAGAGGCCCATCTGAGAAGGAATTAAAGCACCTGATCAGCTTGTCACACCTGTGAGGGAGCCACCTTGTAAGCAAATCCTAAAGCCACAATCAAGCCTTCAGAGGACTGTCACCTCAATCTGACTCCAGCTACAGAAGAGCCCTAAGTGAAAACCAACAATGCCCTTCTTGAATTACTGACCTAGAATTTGTGAGCATAATAAATCATCATTTTATGCCATTAAATTTTGTAATAATTTGTTATACCATCATAGTAACTGCAATAATAGTTAAATGTATGCATATTCACTAAATTTATAGATTTAATTCTCACTTTTAAGAAAATAGGAACTCAACAGAGGTTGTAAGATCAAGCACACACTTA…	C	10	WXP1,WXP4,WXP7,XP2,XP3,XP4,XP6	-	-	intergenic_variant	MODIFIER	-	-	-	3	4	0	7
sv_00571	1	33476151	33476419	268	DEL	TTGGAATAATTTTTTTTTTTTTTGTTATTTCTTTGGGCCGCTCCCGCGGCATATGGAGGTTCCCAGGCTAGGGGTCTAATCGGAGCTGTAGCTACTGGCCTACGCCAGAGCCACAGCAACGTGGGATCCGAGCCGCGTCTGCAACCTACACCACAGCTCACGGCAACGCCGGATCATTAACCCACTGAGCAAGGGCAGGGACCGAACCCGCAACCTCATGGTTCCTAGTCGGATTCGTTAACCACTGCGCCACGACGGGAACTCC	T	7	XP6,LW4,LW6,LW7,DU1,DU2	ENSSSCG00000004204	ENSSSCT00000004645.4	intron_variant,feature_truncation	MODIFIER	TMEM244	protein_coding	INTRON=1/4,STRAND=1	0	1	5	6
sv_00572	1	33487245	33487564	319	DEL	TTGCAACCACCATTATCTTTTTTTTTTTTTTTTTTTTGTCTTTTGTCTTTTTTTTGTTGTTGTTGTTGTTGTTGTTGTTGCTATTTCTTGGGCCGCTCCCACGGCATATGGAGGTTCCCAGGCTAGGGGTCCAATCGGAGCTGTAGCCACCGGCCTACGCCAGAGCCACAGCAACGCAGGATCCGAGCCGCATCTGCAACCTACACCACAGCTCACGGCAACGCCGGATCGTTAACCCACTGAGCAAGGGCAGGGATCGAACCCGCAACCTCATGGTTCCTAGTCGGATTCGTTAACCACTGCGCCACGACGGGAACTCC	T	11	WXP5,XP1,XP3,XP5,XP6,LW4,LW6,LW7,LA7,DU6,DU7	ENSSSCG00000004204	ENSSSCT00000004645.4	intron_variant,feature_truncation	MODIFIER	TMEM244	protein_coding	INTRON=3/4,STRAND=1	1	4	6	11
sv_00573	1	33648215	33648504	289	DEL	TAAGAAGCGCCAGACTTGGAGTTCCCGTCGTGGCGCAGTGGTTAACGAATCCGACTAGGAACCATGACGTTGCGGGTTCGGTCCCTGCCCTTGCTCAGTGGGTTAACGATCCGGCGTTGCCGTGAGCTGTGGTGTAGGTTGCAGACGCGGCTCGGATCCTGCGTTGCTGTGGCTCTGGCGTAGGCCGGTGGCTACAGCTCCGATTCGACCCCTAGCCTGGGAAACTCCATATGCCGCGGGAGCGGCCCAAGAAATAGCAACAACAACAACAACAAAAGACAAAAAAAAAA	T	10	WXP1,WXP2,WXP6,XP2,XP3,XP4,XP6,XP7,LA5,LA6,LA7,DU7	ENSSSCG00000004205	ENSSSCT00000004646.4	intron_variant,feature_truncation	MODIFIER	ARHGAP18	protein_coding	INTRON=1/8,STRAND=1	3	5	4	12
sv_00574	1	33699571	33700546	975	DEL	TGTGGTAGTTCCCGTTGTGGCTAAGCGGTAATGAACTCGACTAGTATCCAAAGGTCGTAGATGGGCTCGGATCCAGTGTCGCTGAGGCTGTGGTGCAGGCCTGCAGGTGTATCTCCAAGTTGACCCCTAGCCCAGGAACTTCCATATCCCGCAGGTGCAGCCCTAAAAAAAAAATAAAATAAAAATAAAGAAGTGGTTGTGACTGGCGGGGACATAGTATGAAATGATGTCAGAGGAACCAGATGATGCAGGGCCTTGTAGGCCATTGTTGGAAATCTGGATATGCCCCGGATGAAACAGGATCACTGTAGGGTTTTGAACAAATACTTGAAAATCTATATTTTAAAATGATCCCTTGGACTGTTGTGGGTTAAAAACAAACTCTAGGAAAGCAAGCAT…	T	6	LW5,LA3,LA5	ENSSSCG00000004205	ENSSSCT00000004647.4	intron_variant,feature_truncation	MODIFIER	ARHGAP18	protein_coding	INTRON=13/15,STRAND=1	0	0	3	3
sv_00575	1	33807026	33807112	86	DEL	TATTTATTTATTTATTTATTTATTTTTGTCTTTTTGCTGTTTCTTGGGCCGCTCCCGCGGCATATGGAGGTTCCCAGGCTAGGGGTA	T	11	WXP5,WXP6,WXP7,XP1,XP2,XP3,XP4,XP5,XP6,LW6,LW7,LA6,LA7,DU1,DU3,DU5,DU7	ENSSSCG00000004207	ENSSSCT00000048337.2	intron_variant,feature_truncation	MODIFIER	-	protein_coding	INTRON=51/62,STRAND=-1	3	6	8	17
sv_00576	1	33809746	33809824	78	DEL	TTCTTTCTCTCTCTTTCTTTCTTTCTTTCTTTCTTTCTTTCTTTCTTTCTTTCTCTCTCTCTCTCTCTCTCTCTCTCTC	T	4	DU2,DU3,DU6	ENSSSCG00000004207	ENSSSCT00000048337.2	intron_variant,feature_truncation	MODIFIER	-	protein_coding	INTRON=50/62,STRAND=-1	0	0	3	3
sv_00577	1	33825296	33825562	266	DEL	TCAAGGAAGAAAATTCTTTTTTTTTTTGTCTTTTTAGGGCTACACCCAGTGGCATACTGAGGTTCCCAGGCTAGGGGTCCAATTGCAGCTAGAGCTGCTGGCATATACCACAGTCACAGCAATGCCAGATCTGAGCTGCGTCTGCGACCTACACCACAGCTCACGACAATGCCGGATCCTTAACCCTCTGAGTGAGGCCAGGGAGCGAACCCGCAACCTCATGGTTCCTAGTCGGATTCGTTAACCACTGCGCCACGACGGGAACTC	T	8	WXP3,XP3,XP6,LA6	ENSSSCG00000004207	ENSSSCT00000048337.2	intron_variant,feature_truncation	MODIFIER	-	protein_coding	INTRON=47/62,STRAND=-1	1	2	1	4
sv_00578	1	34008714	34008931	217	DEL	TAAAAACCAGTGAAGCTTTACAAGGAGATCCCGCTGAATAGCATTGAGAACTATGTCTAGATACTCATGTTGCAACAGAAGAAATGGTGGGGGAAAAACTGTAATTGTAATGTATACATGTAAGGATAACCTGACCCCCTTGCTGTACAGTGGGAAAATAAAATTAAAAAAAAAAAAAAAAAAAAAAAGAAATGGAAGCAAATGTGAAAAAAAAAAAA	T	8	XP6,LA7,DU1,DU7	ENSSSCG00000033894	ENSSSCT00000036716.2	intron_variant,feature_truncation	MODIFIER	LAMA2	protein_coding	INTRON=15/40,STRAND=-1	0	1	3	4
sv_00579	1	34066051	34066159	108	DEL	TTCTCTCTCTCATTCTCTCTCTCTCTCTCTCTCTCTCTCTCATTCTCTCTCTCTCTCTCTCTCTCTCTCTCTCTCTCTCTCTCTCTCTCTCTCTCTCTCTCTCTCTCTC	T	10	WXP1,WXP3,WXP4,XP7	ENSSSCG00000033894	ENSSSCT00000036716.2	intron_variant,feature_truncation	MODIFIER	LAMA2	protein_coding	INTRON=12/40,STRAND=-1	3	1	0	4
sv_00580	1	34175685	34175799	114	DEL	GCGACGCAACCAGCAAGTGTATCTGAAAACCCCATCTTTCCCCAACCAATCAGCAGGTCAACCAACCAGCAAGTGTATCTGAAACCTATCTTTCCCCAACCAATCAGCAGGTCAA	G	15	WXP5,WXP6,WXP7,XP2,XP6,XP7	ENSSSCG00000033894	ENSSSCT00000036716.2	intron_variant,feature_truncation	MODIFIER	LAMA2	protein_coding	INTRON=3/40,STRAND=-1	3	3	0	6
sv_00581	1	34313730	34313810	80	DEL	TATAAAAAAAAAAAAAAAAAAAAAAAAAAAAACTTCAAAAAAAAAAAAAAAAAAAAAAAAAAAAAAAAAAAAAAAAAAAAA	T	22	WXP2,WXP3,WXP5,WXP6,WXP7,XP1,XP2,XP3,XP4,XP6,XP7,LW4,LW5,LW6,LW7,LA6,LA7,DU1,DU3,DU4,DU5,DU6,DU7	ENSSSCG00000033894	ENSSSCT00000036716.2	intron_variant,feature_truncation	MODIFIER	LAMA2	protein_coding	INTRON=1/40,STRAND=-1	5	6	12	23
sv_00582	1	34404833	34405096	263	DEL	TAGAAAGGCACAGAATGGAGTTCCCGTCGTGGCGCAGTGGTTAACGAATCCGACTAGGAACCATGAGGTGCGGGTTCGGTCCTGCCTTGCTCAGTGGGTTAACGATCGGCGTGCGTGAGCTGTGGTGTAGGTTGCAGACGCGGCTCGGATCCGCGTGCTGTGGCTCTGGCGTAGGCGGTGGCTACAGCTCCGATTCACCCTAGCCTGGAACTCCATATGCCGGGAGCGCCAAGAAAACAACAACAACAAAAAGACAAAAAAAAA	T	7	WXP7,XP4,XP7,LW1,LA7,DU1	-	-	intergenic_variant	MODIFIER	-	-	-	1	2	3	6
sv_00583	1	34439493	34446092	6599	DEL	TAAGACTATAGAAATCATTTAGGTGGAGGGTTAAGTTGTCAATTTGGGATCTTTCTTCTTTTTTGAGAAAGGCCTGGATTGCTATAAATTTCCCTCTGAGCACTGTTTTCGCAGCATCCCATAGATTTTGAGAGGTTGTGTCTTCATTATCATTTGTTTCAAGATAGTTTTTAATTTCCTTCTTGATTTCCTCATTGACCCATTGGTTTTTTAGTAGCATGTTGTTTAGTCTCCATGGAGTAGGTTTTTTCTCTTTCCTTTTCCCATGGTTGATTTCTAATTTCATGGCATTGTGGTCAGAGAAGATACTTGAGATAATTTCTATGCTCCTAAATTTATTGAGATTCGCTTTATGTCCCAATATGTGGTCGATTCTTGAGAATGTTCCATGAGCATTTG…	T	11	XP3,XP6	ENSSSCG00000048279	ENSSSCT00000090837.1	transcript_ablation	HIGH	-	protein_coding	STRAND=-1	0	2	0	2
sv_00584	1	34508026	34508026	77	INS	A	ATAAAGCTTCAGAAATGTTAAGTGACTTGTAACAAACCATCCAGCTTGTAACTGACAGCACAAGGATCAGAGTACAGG	6	XP6,DU7	-	-	intergenic_variant	MODIFIER	-	-	-	0	1	1	2
sv_00585	1	34567840	34568162	322	DEL	AAAATAAATATTCGGAGTTCCCCTCGTGGCGCAGTGGTTAACGAATCCGACTAGGAACCAAGAGGTTGCGGGTTCGGTCCCTGCCCTTGCTCAGTGGGTTAACGATCCGGCGTTGCCGTGAGCTGTGGTGTAGGTCGCAGACGCGGCTCGGATCCCTCATTGCTGTGGCTCTGGCGTAGGCCGGTGGCTACAGCTCCAATTCAACCCCTAGCCTGGGAACCTCCATATGCCGCGGGAGCGGCCCAAGAAATAGCAACAACAGCAACAACAACAACAACAGACAAAAAGACAAAAAAAAAAAAAAAAGACAAAAATAAATAAAT	A	11	WXP6,WXP7,XP1,XP2,XP3,XP4,XP5,XP6,XP7,LW4,LW6,LA6,LA7,DU6,DU7	-	-	intergenic_variant	MODIFIER	-	-	-	2	7	6	15
sv_00586	1	34591358	34591925	567	DEL	TATTTTCTCTGGGTCCCGTCGTGGCGCAGGGGTTAACCAATCCGACTAGGAACCACGAGGTTGTGGGTTTGATCCCTGGCCTCGCTCAGCGGGCTAAGGGTCCGGCGTTGCCGTGAGCTGTGGCGTAGGTCACAGACGTGGCTCGGATGCCGAGTTGCCGTGGCTGTGGCGTAGGCCAGTGGCTACAGTTCCAATTCCACCTCTAGCCTGGGAACCTCCATATGCCACAGGAAGCAGCCTTAGAAAAGGCAAAAAGCAAAAAAAAAAAAAAAAAAAAAAAAAGGAGTTCCCATCGTGGCGCAGTGGTTAACGAAACCGACTAGGAACCATGAGATTGCGGGTTCGGTCCCTGCCCTTGCTCAATGGGTTAACGATCCGGCGTTGCTGTGAGCTGTGGTG…	T	13	XP3,LW5,LW7,LA4,LA6,LA7,DU3,DU5	-	-	intergenic_variant	MODIFIER	-	-	-	0	1	7	8
sv_00587	1	34729462	34729617	155	DUP:TANDEM	ACAGATTCAGTCTTCAATTTGTTGAAGCTAGTATTAGATTGTTTAACTTGTTAAAACTTGGAGACAGATGTCTGTTGATGGTTAACAATTCACTTGATAATGTAAGTTAAGATTATAAATTGGATTTAAAGTAACCTGCCAAAAGCATTATTTTTA	ACAGATTCAGTCTTCAATTTGTTGAAGCTAGTATTAGATTGTTTAACTTGTTAAAACTTGGAGACAGATGTCTGTTGATGGTTAACAATTCACTTGATAATGTAAGTTAAGATTATAAATTGGATTTAAAGTAACCTGCCAAAAGCATTATTTTTACAGATTCAGTCTTCAATTTGTTGAAGCTAGTATTAGATTGTTTAACTTGTTAAAACTTGGAGACAGATGTCTGTTGATGGTTAACAATTCACTTGATAATGTAAGTTAAGATTATAAATTGGATTTAAAGTAACCTGCCAAAAGCATTATTTTTA	10	WXP6,WXP7,XP3,XP7,DU1	ENSSSCG00000004209	ENSSSCT00000004650.4	intron_variant	MODIFIER	PTPRK	protein_coding	INTRON=1/31,STRAND=1	2	2	1	5
sv_00588	1	34758056	34758379	323	DEL	TAAGAATCCAACTGCAGGAGTTCCCGTCGTGGCGCAGTGGTTAACGAATCCGACTAGGAACCATGAGGTCGCGGGTTCGATCCCTGCCCTTGCTCAGTGGGTTAACGATCCGGCGTTGCCGTGAGCTGTGGTGTAGGTTGCAGACGCGGCTCGGATCCTGCGTTGCTGTGGCTCTGGTGTAGGCTGGTGGCTACAGCTCCGATTCAACCCCTAGCCTGGGAACCTCCATATGCCGCGGGAGCGGCCCAAGAAATAGCAACAACAACAACAACAACAACAAAAGACAAAAAAAGACAAAAGACAAAAAAAAAAAAAAAAAAAAAA	T	14	WXP1,WXP5,WXP6,WXP7,XP1,XP3,XP4,XP5,XP6,XP7,LW1,LW3,LW5,LW7,LA1,LA2,LA7,DU1,DU4	ENSSSCG00000004209	ENSSSCT00000004650.4	intron_variant,feature_truncation	MODIFIER	PTPRK	protein_coding	INTRON=1/31,STRAND=1	4	6	9	19
sv_00589	1	34845147	34845418	271	DEL	TGAAATACTCTTTTTTTTTTTTTTTGTCTTTTTTTTGCTATTTCTTTGGGCGCTCCACGGCATATGGAGTTCCAGCTAGGGTTGAATCGGAGCTGTAGCCGCCAGCCTACGCCAGAGCCACAGCAACGCAGGATCCGAGCCGCGTCTGCAACCTACACCACAGGTCACGGCAACGCCGGTTCCTTAATCCACTGAGCAAGGGCAGGGACTGAACCCGCAACCTCATGGTTCCTAGTCGGATTCGTTAACCACTGCGCCACGATGGGAACTCC	T	12	WXP6,XP3,XP4,XP6,XP7,LW4,LW5,LA5,LA6,LA7,DU3,DU4,DU6	ENSSSCG00000004209	ENSSSCT00000004650.4	intron_variant,feature_truncation	MODIFIER	PTPRK	protein_coding	INTRON=2/31,STRAND=1	1	4	8	13
sv_00590	1	34878342	34878799	457	DEL	ATTTAGCTTAGCAGGCAATCACAACTATCTTCTCCATTTACAGTGTTATGTAGAATTGGCTTTCGGCAAAGTGGTATGGGCATGTATGGAAAACTTGATCTTAGTAACAAGTCAGGACTGTCTTCATTTACTAATCATTCATTATTTAATTTATGTACTTTCATTGTTACATAGATAATTAGAGGGGACTTATTCTAAGCTAGTTAACCAACTGACAAAGGATAAATAAGGAGAAAAGACTCCTGCCATGTAAGATGGAAATATGATTATAAAATCAGGTTCACAGCCCCAAACCCTAAGTTTTCCAGCCACTAAAGCATATAGGGCTGTTCCAGTTGAACCTCAAATTAGATGCAAGCTTCCTGTCTCCAAACTTGAAAAGGAAATACATAATTAGTC…	A	11	LA6,LA7	ENSSSCG00000004209	ENSSSCT00000004650.4	intron_variant,feature_truncation	MODIFIER	PTPRK	protein_coding	INTRON=2/31,STRAND=1	0	0	2	2
sv_00591	1	34987554	34995602	8048	DEL	ATATGTTACTTCATTTTCTTTTTTTTTTTTTTTTTTTTTTTTTAATTTTATTTTCCCACTGTACAGCAAGGGGGTCAGGTTATCCTTACATGTATACATTACAATTACAGTTTTTCCCCCACCATTTCTTCTGTTGCAACATGAGTATCTAGACATAGTTCTCAATGCTATTCAGCGGGATCTCCTTGTAAATCTATTCTACGTTGTGACTGATAAGCCCAAGCTCCCAATCCCTCCCACTCCCTCCCCCTCCCATCAGGCAACCACAAGTCTCTTCTCCCAAGTCCATGATTGATTTTCTTTTCTGAGGAGATGTTCATTTGTGCTGGATATTAGATTCCAGTTATAAGTGATGTCATATGGTATTTGTCTTTGTCTTTCTGGCTCATTTCACTCAGT…	A	11	XP1,XP2,XP3,XP4,XP5,XP6,LW1,LW3,LW4,LA1,LA3,DU5	ENSSSCG00000004209	ENSSSCT00000004650.4	intron_variant,feature_truncation	MODIFIER	PTPRK	protein_coding	INTRON=5/31,STRAND=1	0	6	6	12
sv_00592	1	35036702	35036969	267	DEL	TAAAAATAGCATTACCGGAGTTCCCATCGTGGCTCAGTGGTTAACGAATCCGACTAGGAGCCATGAGGTTGCGGGTTCGGTCCCTGCCCTTGCTCAGTGGGTTAACGATCCGGCGTTGCCGTGAGCTGTGGTGTAGGTTGCAGACGCGGCTGGGATCCCACGTTGCTGTGGCTCTGGCGTAGGCCGGTGGCTACAGCTCCGATTCGACCCCTAGCCTGGGAACCTCCATATGCCACGGGAGCGGCCCAAGAAATAGTTTAAAAAAAAA	T	7	WXP3,WXP4,XP2	ENSSSCG00000004209	ENSSSCT00000004650.4	intron_variant,feature_truncation	MODIFIER	PTPRK	protein_coding	INTRON=7/31,STRAND=1	2	1	0	3
sv_00593	1	35307170	35307442	272	DEL	AATATATAGGTAGGGAGTTCCCGTCATGGCGCAGTGGTTAACGAATCCGACTAGGAACTATGAGGTTGCGGGTTCGGTCCCTGCCCTTGCTCAGTGGGTTAAGGATCCGGCGTTGCCGTGAGCTGTGGTGTAGGTTGCAGACACGGCTCGGATCCTGCGTTGCTGTGGCTCTGGCGTAGGCCAGTGGCTACAGCTCCGATTCGACCCCTAGCCTGGGAACCTCCATATGCCGCAGGAGCGGCCCAAAGAAATAGCAAAAAAAAAAATATATAT	A	6	WXP7,XP3	-	-	intergenic_variant	MODIFIER	-	-	-	1	1	0	2
sv_00594	1	35361448	35361723	275	DEL	TAAAGGACAACTCCTGGAGTTCCCGTCATGGCGCAGTGGTTAATGAATCCGACTAGGAACCATGAGGTTGCGGGTTCAGTCCCTGCCCTTGCTCAGTGGGTTAACGATCCTGCGTTGCGGTGAGCTGTGGTGTAGGTTGCAGACGCGGCTCGGATCCTGCGTTGCTGTGGCTCTGGTGTAGGCCGGGGACTACAGCTCCGATTGGACCCCTAGCCTGGGAACCTCCATATGCCACGGGAGCGGCCCAAAGAAATAGCAAAAAGACAAAAAAAAAAA	T	15	WXP2,WXP3,WXP4,WXP5,WXP6,XP1,XP2,XP3,XP5,XP6,XP7,LW6,LW7,LA6,LA7	ENSSSCG00000024392	ENSSSCT00000030479.3	intron_variant,feature_truncation	MODIFIER	THEMIS	protein_coding	INTRON=2/8,STRAND=1	5	6	4	15
sv_00595	1	35366842	35366915	73	DEL	AAAAAAAAAAAAAAAAAAAAAAAAAAAAAAAAAAGCAACCCCAAACAATTCAGGTCCTAAGTATCAGTTTGAAT	A	10	WXP2,WXP3,WXP6,WXP7,XP3,XP6,XP7	ENSSSCG00000024392	ENSSSCT00000030479.3	intron_variant,feature_truncation	MODIFIER	THEMIS	protein_coding	INTRON=2/8,STRAND=1	4	3	0	7
sv_00596	1	35380952	35381400	448	DEL	TTCTCTCATAGATTTTGCCTGTGGTATCATGTCTAAAAATTCATCATCAAACCTAAACTCATCTAGATTTTATGCTCTGTTATCTTCTAAGAGTTTTATAGTTTTGCATTTTACATTTGACTCTGTGACACATTTTGAATTAATTTTTTAAAAAGGTGTAAAATCTGTGTCTAGATTTTTTTAACATGTGGATACCCAATTGTTCTAGCATCATTTGTTGAAAATACAGTTTTTGCTCCATTGTATTGCCTTTGCTCCTTTGTCAAAGATCAGTTGACTTGTTTATATGAGTTTATTTCTGAGGTCTTCCTTCTGTTTTATTGATTGCTTTATTTTTCATTCTTTCCTTCCTGTACCTGTGGCATATGGAAGTTCCCAGGCTAGGAATTGAATTGGAGC…	T	13	WXP3,WXP4,WXP5,WXP6,WXP7,XP2,XP5,XP7,LA6,LA7	ENSSSCG00000024392	ENSSSCT00000030479.3	intron_variant,feature_truncation	MODIFIER	THEMIS	protein_coding	INTRON=3/8,STRAND=1	5	3	2	10
sv_00597	1	35417795	35418053	258	DEL	ACAGAAATTTCTTTTTTTTTTTTTTTTTTTTTTTTTGGTTTCATGCTAAATGTATTTTTTTTTTTTAATTATTTTCCCACTGTACAGCAAGGGGGTCAGGTCATCCTTAGATGTATACATTGCAGTTACAGTTTTTTCCCCCACCCTTTCTTCTGTTGTGACATGAGTATCTAGACATAGTTCTCAATGCTATTCAGCAGGATCTCCTTATAAATCTATTCTAGGTTGTGTCTGATAAGCCCAAGCTCCCGATCCCTCC	A	15	WXP1,WXP2,WXP5,XP2,XP3,XP4,XP5,XP6,XP7,DU1,DU7	ENSSSCG00000024392	ENSSSCT00000030479.3	intron_variant,feature_truncation	MODIFIER	THEMIS	protein_coding	INTRON=4/8,STRAND=1	3	6	2	11
sv_00598	1	35613744	35614113	369	DEL	TAAAAAAAGTGAATCTTCAACAACAACAACAACAAAAAGACAAAAAGACAAAAAGACAAAAAAAAAAAAAAAAAAAAAAAAAAAAGGAGTTCCCGTCGTGGCGCAGTGGTTAACGAATCCGACTAGGAACCATGAGGTTGCGGGTTCAGTCCCTGCCCTTGCTCAGTGGGTTAACGATCCGGCGTTGCCGTGAGCTGTGGTGTGGGTTGCAGACGCGGCTCGGATCCCGCGTTGCTGTGGCTCTGGCGTAGGGCCGGTGGCTGCAGCTCCGATTGGACCCCTAGCCTGGGAACCTCCATATGCCACGGGAGCGGCCCAAGAAATAGCAACAACAACAACAAAAAGACAAAAAGACAAAAAAAAAAAAAAA	T	12	WXP2,WXP4,WXP5,WXP6,WXP7,XP1,XP2,XP3,XP4,XP5,XP6,XP7,LW4,LA6,LA7,DU4,DU6,DU7	ENSSSCG00000004212	ENSSSCT00000004653.4	intron_variant,feature_truncation	MODIFIER	-	protein_coding	INTRON=5/5,STRAND=1	5	7	6	18
sv_00599	1	35641026	35641748	722	DEL	ATCAAATAGGGTAATTTCTTTTTTTTTTTTTTTTTATTTTCCCACTGTACAGCAAGGGGGTCAGGTTATCCTTACATGTATACATTACAATTACAGTTTTTCCCCCACCATTTCTTCTGTTGCAACATGAGTATCTAGACATAGTTCTCAATGCTATTCAGCAGGATCTCCTTATAAATCTATTCTAGGTTGTGTCTGATAAGCCCAAGCTCCCGATCCCTCCCACTCCCTCCCCCTCCCATCAGGCAACCACAAGTCTCTTCTCCAAGTCCATGATTTTCTTTTCTGAGGAGATGTTCATTTGTGCTGGATATTAGATTCCAGTTATAAGTGATATCATATGGTATTTGTCTTTATCTTTCTGGCTCATTTCACTCAGGATGAGATTCTCTAGTTCCA…	A	8	WXP4,WXP6,XP1,XP2,XP3,XP5,XP6,XP7,LA7	ENSSSCG00000004213	ENSSSCT00000004655.3	intron_variant,feature_truncation	MODIFIER	-	protein_coding	INTRON=1/5,STRAND=-1	2	6	1	9
sv_00600	1	35658261	35658505	244	DEL	TTTATGAAGATTCCTCCAAAACCTGCAGTCAATTTTCCTCGTGTGTTAGAAAGGGCTAAACTTCTGATGTTCTTTGGTTGCCCAGATCTATCTGAATGTTTCAGCAGATATTAGAAACATACAAGTTAGGGGGAAAAAAAGAATTATAGCATATGACTTCCTATGGCTACCCTTTTCTTTTCCAAACATATTATTGGGGTACAAAGAAAAGGGTGTCAGGATTTTTTTACTTTTCCTATATTGTG	T	4	WXP3,WXP5,WXP7	-	-	intergenic_variant	MODIFIER	-	-	-	3	0	0	3
sv_00601	1	35788892	35789202	310	DEL	TAAAAATCACCATTCCTGGAGTTCCCGTCGTGGCGCAGTGGTTAACGAATCCGACTAGGAACCATGAGGTTGCGGGTTCGATCCCTGCCCTTGCTCGGTGGGTTAACGATCCGGCGTTGCCGTGAGCTGTGGTGTAGGTTGCAGACGCGGCTCGGATCCCGCGTTGCTGTGGCTCTGGCGTAGGCCGGTGGCTACAGCTCCGATTCGACCCCTAGCCTGGGAACCTCCATATGCCGCAGGAGCGGCCCAAGAAATAGTAACAACAACAACAACAACAACAAAAAAAAAGACAAAAAGACAAAAAAAAAAAA	T	14	WXP4,WXP6,WXP7,XP1,XP2,XP3,XP5,XP6,XP7,LW4,LW7,LA5,LA6,LA7,DU1,DU6	-	-	intergenic_variant	MODIFIER	-	-	-	3	6	7	16
sv_00602	1	35808880	35809321	441	DEL	ATCTGCGACCTACACCACAGCTTATGGCAACACCAGATCCTTAACCCACTGAGCAAGACCAGGAATCGAACATTGCATCCTCATGGATGCTAGTCAGGTTATACACTATTTCTCACATCATACCACTGAGCCATGACAGGAACTCCCAGCAACTCTTAATTGTGTGATTAGCACCTCAGTATTTTTAACACATCCTAGAAACCAAGAAAAATGTTCTAATCCAGCATGAAATTCTCTGATTTACAAGTTCTATCAGACATGTCTTAGTGTTGGCTTTTTATTTTTTTTATTTTTATTATTTATTTATTTATTTATTTTTTGTCTTTTTGTCTTTTTCTAGGGCCGCTCCCACGGCACATGGAGGTTCCCAGGCTAGGGGTCGAATCGGAGCTGTAGCCA…	A	7	WXP2,WXP3,WXP5,WXP6,XP5,XP6	-	-	intergenic_variant	MODIFIER	-	-	-	4	2	0	6
sv_00603	1	35864208	35864310	102	DUP:TANDEM	CTTTCTTTTTTCACGTGGTGTGGTGCAAGCTTGTTCAGCTGGGCTAAATCTGCTTATGGTGAGACAGCAAAGTATCCTACAGGACAACTTTATTTTATTTTAT	CTTTCTTTTTTCACGTGGTGTGGTGCAAGCTTGTTCAGCTGGGCTAAATCTGCTTATGGTGAGACAGCAAAGTATCCTACAGGACAACTTTATTTTATTTTATTTTCTTTTTTCACGTGGTGTGGTGCAAGCTTGTTCAGCTGGGCTAAATCTGCTTATGGTGAGACAGCAAAGTATCCTACAGGACAACTTTATTTTATTTTAT	4	WXP5,WXP7,LW7	ENSSSCG00000004216	ENSSSCT00000004659.4	intron_variant	MODIFIER	ECHDC1	protein_coding	INTRON=1/5,STRAND=1	2	0	1	3
sv_00604	1	35937624	35938137	513	DEL	CCCCATCCTGATCTTTTTTTTTTTTTTTTTTTTTTTTTTTTAATTTTATTTTCCCACTGTACAGCAAGGGGGTCAGGTTATCCTTACATGTATACATTACAATTACAGTTTTTCCCCCACCATTTCTTCTGTTGCAACATGAGTATCTAGACATAGTTCTCAATGCTATTCAGCGGGATCTCCTTGTAAATCTATTCTAAGTTGTGTCTGATAAGCCCAAGCTCCCGATCCCTCCCACTCCCTCCCCCTCCCATCAGGCAACCACAAGTCTCTTCTCCAAGTCCATGATTGATTTTCTTTTCTGAGGAGATGTTCATTTGTGCTGGATATTAGATTCCAGTTATAAGTGATGTCATATGGTATTTGTCTTTGTCTTTCTGGCTCATTTCACTCAGTATG…	C	21	WXP2,WXP3,WXP4,WXP5,WXP6,WXP7,XP1,XP3,XP4,XP5,XP6,LA5,LA6,LA7,DU1,DU7	-	-	intergenic_variant	MODIFIER	-	-	-	6	5	5	16
sv_00605	1	35948721	35949018	297	DEL	TAAGAACCCAATATAGGAGTTCCCGTCGTGGCGGCAGTGGTTAACGAATCCGACTAGGAACCATGAGGTTGCGGGTTCGGTCCCTGCCCTTGCTCAGTGGGTTAACGATCTGGCGTTGCCGTGAGCTGTGGTGTAGGTCGCAGGCGCGGCTCGGATCCTGCGTTGCTGTGGCTCTGGTGTAGGCCGGTGGCTACAGCTCCGATTCAACCCCTAGCCTGGGAACCTCCATATGCCGCAGGAGCGGCCCAAGAAATAGCAAAAAAGAAGACAAAAAAAAAAAAAAAAAAAAAAAAAAAAA	T	8	XP4,LA6,LA7	-	-	intergenic_variant	MODIFIER	-	-	-	0	1	2	3
sv_00606	1	36018558	36018844	286	DEL	GAAAATTAAATGGAGGAGTTCCCGTTGTGGTGCAGTGGTTAACGAATCCGACTAGGAACCATGAGGTCGCGGGTTCGGTCCCTGCCCTTGCTCAGTGGGTTAACGATCTGGCGTTGCCGTGAGCTATGGTGTAGGTTGCAGATGCGGCTCAGATCCCGCGTTGCTGTGGCTCTGGCGTAGGCTGGCGGCTACAGCTCCAATTAGACCCCTAGCCTGGGAACCTCCATATGCCGCGGGAGCGGCCCAAAGAAATAGCAAAAAGACAAAAAAAAAAAAAAAAAAAAAAA	G	11	WXP5,XP1,XP3,XP4,XP5,XP6,XP7,LA4,LA5,LA6,LA7,DU1	ENSSSCG00000004218	ENSSSCT00000004661.4	intron_variant,feature_truncation	MODIFIER	RSPO3	protein_coding	INTRON=4/4,STRAND=-1	1	6	5	12
sv_00607	1	36117560	36117866	306	DEL	TAAAAAGGGAATAAAGGAGTTCCCGTCGTGGCGCAGTGGTTAACGAATCTGACTAGGAACCATGAGGTTGCGGGTTCGGTCCCTGCCCTTGCTCAGTGGGTTAACGATCCGGCGTTGCCGTGAGCTGTGGTGTAGGTTGCAGACGCGGCTCGGATCCCGCGTTGCTGTGGCTCTGGCGTAGACCGGTGGCTACAGCTCCGATTCAACCCCTAGCCTGGGAACCTCCATATGCCGCGGGAGTGGCCCAAGAAATAGCAACAACAACAACAAAAAAAAAAGACAAAAGACAAAAAAAAAAAAAAAAAAA	T	6	WXP7,LA7	-	-	intergenic_variant	MODIFIER	-	-	-	1	0	1	2
sv_00608	1	36127038	36127324	286	DEL	CGGTGTTTCACCTTTATTTATTTATTTATTTATTTTTGTCTTTTTGCCATTTCTTGGGCCGCTCCTGCGGCATATGGAGTTTCCCAGGCTAGGGGTCTAATCGGAGCTGTAGCCACCGGCCTACGCCAGAGCCACAGCAACGCGGGATCCGAGCCGCGTCTGCAACCTACACCACAGCTCACGGCAACGCCGGATCGTTAACCCACTGAGCAAGGGCAGGGATCGAACCCGCAACCTCATGGTCCCTAGTCGGATTCGTTAACCACTGCGCCACGACGGGAACTCCT	C	10	XP4,XP5,LA5,LA7	-	-	intergenic_variant	MODIFIER	-	-	-	0	2	2	4
sv_00609	1	36289844	36289935	91	DEL	TTGAAAGTGATTTTTTTTTCTTTTTTTTTTATTTTATTTATTTTTTTTTATTATTCCACTGTACAGCAAGGGGGTCAGGTTATCCTTACATG	T	18	WXP1,WXP4,WXP5,WXP6,WXP7,XP1,XP2,XP3,XP4,XP5,XP6,XP7,LA4,LA5,LA7,DU2,DU7	ENSSSCG00000042355	ENSSSCT00000083217.1	upstream_gene_variant	MODIFIER	-	protein_coding	DISTANCE=2091,STRAND=-1	5	7	5	17
sv_00610	1	36519907	36520215	308	DEL	TCAACCCAGTGTTTTTTTTTTTTTTTTTTTTTTTTTTTTTTTTTTTTTTTTTGTCTTTTGTTGTTGTTGCTATTTCTTGGGCCGCTCCCGCGGCATATGGAGGTTCCCAGGCTAGGGGTTGAATCGGAGCTGTAGCCACCGGCCTACGCCAGAGCCACAGCAACGCGGGATCTGAGCCGCGTCTGCAACCTACACCACAGCTCACGGCAACGCCGGATCGTTAACCCACTGAGCAAGGGCAGGGACCGAACCCGCAACCTCATGGTTCCTAGTCGGATTCGTTAACCACTGCGCCACGACGGGAACTCC	T	10	WXP7,LW4,LW6,LW7,LA7	ENSSSCG00000045632	ENSSSCT00000089402.1	intron_variant,feature_truncation	MODIFIER	CENPW	protein_coding	INTRON=2/3,STRAND=-1	1	0	4	5
sv_00611	1	36641415	36641749	334	DEL	TGGATTTTTTTTTTTTTTTTTTTTTTTTTTTTTTTTTTTGTCTTTTTGTCTTTTTGCCTCTTTTTGTCTGTTGTTGTTGCTATTTCTTGGGCCGCTCCTGGGGCATATGGAGGTTCCCAGGCTAGGGGCTGAATCGGAGCTGTAGCCACCGGCCTACGCCAGAGCCACAGCAACGCAGGATCCGAGCCGCGTCTGCGACCTACACCACAGCTCACGGCAACGCCGGATCATTAACCCACTGAGCAAGGGCAGGGACCGAACCCGCGACCTCATGGTTCCTAGTCGGATTCGTTAACCACTGCGCCACGACGGGAACTCCAATCCAGCAACATATA	T	17	WXP2,LW4,LW5,LW6,LW7,LA5,LA6,LA7,DU4,DU6	ENSSSCG00000045632	ENSSSCT00000089402.1	intron_variant,feature_truncation	MODIFIER	CENPW	protein_coding	INTRON=2/3,STRAND=-1	1	0	9	10
sv_00612	1	36753447	36753920	473	DEL	TAAAAGTAAACTTCACGGAAGATGTGGTATATATACACAATGGAATACTACTCAGCCATAAAAAGGATGACATCATGCCATTTACAGCAACATGGATGGAACTAGAGAATCTCATACTGAGTGAAATGAGCCAGAAAGACAAAGACAAATACCATATGATATCACTTATAACTGGAATCTAATATCCAGCACAAATGAACATCTCCTCAGAAAAGAAAATCATGGACTTGGAGAAGAGACTTGTGGTTGCCTGATGGGAGGGGGAGGGAGTGGGAGGGATCGGGAGCTTGGGCTTATCAGACACAACCTAGAATAGATTTATAAGGAGATCCTGCTGAATAGCATTGAGAACTATGTCTAGATACTCATGTCGCAACAGAAGAAAGGGTGGGGGAAAAA…	T	9	XP3,XP6	-	-	intergenic_variant	MODIFIER	-	-	-	0	2	0	2
sv_00613	1	36893657	36893657	80	INS	A	AAAATCAGTTATTAGAATCTAGATCTGATTCTCAATCCTAGCTTCTTTCACTATCTCAACAGCAGATCACCTGCTTTACAG	5	WXP6,XP1,XP6,LW6	-	-	intergenic_variant	MODIFIER	-	-	-	1	2	1	4
sv_00614	1	36913291	36913595	304	DEL	TAAGAAAAAGAAAGCGGAGTTCCTGTCGTGGCGCAGTGGTTAACAAATCCGACTAGGAACCATGAGGTTGCAGGTTCGGTCCCTGCCCTTGCTCAGTGGGTTAACGATCCAGCGTTGCCGTGAGCTGTGGTGTAGGTTGCAGACGCGGCTCAGATCCCACGTTGCTGTGGCTCTGGCGTAGGCCGGTGGCTACAGCTGTGATTGGACCCCTAGCCTGGGAACCTCCATATGCCGCGGGAGCGGCCCAAGAAATAGCAACAACAACGACAACAACAAAAGACAAAAGACAAAAAGACAAAAAAAAA	T	23	WXP2,WXP7,XP3,XP5,XP6,LW4,LW6,LW7,LA6,LA7,DU3,DU4,DU5	-	-	intergenic_variant	MODIFIER	-	-	-	2	3	8	13
sv_00615	1	36975862	36976142	280	DEL	TAAAGTGGAGTTCCCATCGTGGCGCAGTGGTTAACGAATCCGACTAGGAACCATGAGGTTGCGGGTTCAGTCCCTGCCCTTGCTCAGTGGGTTAACGATCCGGCGTTGCCGTGAGCTGTGGTGTAGATTGCAGACGCGGCTCGGATCCTGCGTTGCTGTGGCTCTGGCATAGGCCGGTGGCTACAGCTCCGATTGGACCCCTAGCCTTGGAACCTCCATATGCCGCGGGAGCAGCCCAAGAAATAGCAAAAAGACAAAAAAAAAAAAAAAAAAAAGAAAAG	T	6	DU3,DU5	ENSSSCG00000004220	ENSSSCT00000004665.4	intron_variant,feature_truncation	MODIFIER	TRMT11	protein_coding	INTRON=9/14,STRAND=-1	0	0	2	2
sv_00616	1	36992201	36992493	292	DEL	TCAGGAGGACAAGTTTTTTTTTTTTTTTTTTTTTTTGTCTTTTTGTTGTTGTTGTTATTTCTTGGGCCGCTCCCGCGGCATATGGAGGTTCCCAGGCTAGGGGTCGAATCAGAGCTGTAGCCACCGGCCTACGCCAGAGCCACAGCAATGCGCGATCCGAGCCGTGTCTGCAACCTACACCACAGCTCACGGCAACGCCGGATCCTTAACCCACTGAGCAAGGGCAGGGACCGAACCCGCAACCTCATGGTTCCTAGTCGGATTCGTTAACCACTGCGCCACGACGGGAACTC	T	10	WXP2,WXP3,WXP4,WXP6,WXP7,XP1,XP2,XP3,XP4,XP5,XP6,XP7,LA1,LA5,LA6,LA7,DU3,DU5,DU7	ENSSSCG00000004220	ENSSSCT00000004665.4	intron_variant,feature_truncation	MODIFIER	TRMT11	protein_coding	INTRON=2/14,STRAND=-1	5	7	7	19
sv_00617	1	37019050	37019142	92	DEL	GTGTGTGTGTGTGTGTGTGTGTGTGTGTGTGTGTGTGTGTGTGTTTGCAAGCGCACCCAAGCACACATGCACACACATACATATGTATGCAAA	G	5	WXP2,WXP3,WXP5	ENSSSCG00000004221	ENSSSCT00000064605.2	intron_variant,feature_truncation	MODIFIER	HINT3	protein_coding	INTRON=1/5,STRAND=-1	3	0	0	3
sv_00618	1	37102679	37102875	196	DEL	CAGACTTGGGCTTATCAGACACAACCTAGAATAGATTTACAAGGAGATCCTGCTGAATAGCATTGAGAACTATGTCTAGATACTCATGTTGCAACAGAAGAAAGAGTGGGGGAAAAACTGTAATTGCAATGTATACATGTAAGGATAACCTGACCCCCTTGCTGTACAGTGGGAAAATAAAAAAAAAAAAAAAAAAA	C	13	WXP6,XP3,XP5,XP6,XP7,LA4,LA5,LA6,LA7,DU1,DU6	ENSSSCG00000004222	ENSSSCT00000004667.4	intron_variant,feature_truncation	MODIFIER	NCOA7	protein_coding	INTRON=7/17,STRAND=-1	1	4	6	11
sv_00619	1	37283292	37283608	316	DEL	ACTCTTTTGAGATTTTATTTTATTTTATTTTTTTTATTTATTTTTATTTTATTTTATTTTATTTTTTTGTCTTTTTGCCATTTCTTGGGCCGCTCCTGCGGCATATGGAGGTTCCCGGGCTAGGGGTGGAATCGGAGCTGTAGCTGCCAGCCTACGCCAGAGCCACAGCAACGCAGGATCCGAGCCGCATCTGCGACCTACACCACAGCGCACGGCAACGCCGGAACCTCAACCCACTGAGAAAGGCCAGGGATCGAACCCGCAACCTCATGGTTCCTAGTCAGATTCGTTAACCACTGCGCCACGACGGGAACTCC	A	7	WXP6,XP2,XP3,XP4,XP6,LW5,LA6,LA7,DU1,DU6	-	-	intergenic_variant	MODIFIER	-	-	-	1	4	5	10
sv_00620	1	37289499	37289793	294	DEL	GGCATTCTCAACTCTTTTTTTTTTTTTTTTGTTGTTGTTGTTGTTGCTGTTGTTGCTATTTCTTGGGCCGCTCCCTCGGCATATGGAGGTTCCCAGGCTAGGGGTTGAATCGGAGCTGTAGCCACCGGCCTACGCCAGAGCCACAGCAACGCGGGATCCGAGCCACGTCTGCAACCTACACCACAGCTCACGGCAACGCCGGACCGTTAACCCCCTGAGCAAGGGCAGGGACCGAACCCGCAACCTCATGGTTCCTAGTCGGATTCGTTAACCACTGCGCCACGACGGGAACTCC	G	9	LW4,LW5,LA6	-	-	intergenic_variant	MODIFIER	-	-	-	0	0	3	3
sv_00621	1	37369712	37369990	278	DEL	TAAAATTAGTTTTATGCGGGAGTTCCCGTTGTGGTGCAGTGGTTAACGAACCCGACTAGGAACCATGAGGTTGCGGGTTCGATCCCTGCCCTTGCTCAGTGGGTTAACGATCCGGCGTTGCCGTGAGCTGTGGTGTAGGTTGCAGACGCGGCTCGGATCCCGCGTGGCTGTGGCTCTGGCGTAGGCCGGTGGCTACAGCTCCGATTCGACCCCTAGCCTGGGAACCTCCACATGCCGCGAGAGCGGCCCAAGAAAATGGCAAAAAGACAAAAAAAAAAA	T	17	WXP1,WXP4,WXP6,XP1,XP2,XP3,XP6,LA7,DU7	-	-	intergenic_variant	MODIFIER	-	-	-	3	4	2	9
sv_00622	1	37420682	37420756	74	DEL	ACTGTACCATATCACAATGAGGACATTGACCTTGATGCAGTCAATGTAAAAATATTTCCATCACCATAGGGATCC	A	8	WXP3,WXP4,XP2,XP7,LA7	-	-	intergenic_variant	MODIFIER	-	-	-	2	2	1	5
sv_00623	1	37441123	37441431	308	DEL	TAGAATCCTTCCGTGAGGAGTTCCCGTCGTGGCGCAGTGGTTAACGAATCTGACTGGGAGCCATGAGGTTGCGGGTTCAATCCCTGGCCTTGCTCAGTGGGTTAGGGATCCGGCGTTGCCATGAGCTGTGGTGTAGGTTGCAGACACAGCTCGGATCCCCGAGTTGCTGTGGCCCTGGCATAGGCTGGCGGCTACAGCTCCGATTCTACCCCTAGCCTGGGAAACCTCCATATGCCGCGGGAGCGGCCCTAGAAAAGGCAAAAAGACAAAATAAATAAATTTAAAAAAAAAAAAAAAAAAAAAAAAAAA	T	4	DU2,DU3	-	-	intergenic_variant	MODIFIER	-	-	-	0	0	2	2
sv_00624	1	37452859	37456641	3782	DEL	TGAATAAATCAACAGGAGAGGACAAGATGGCGGAGGAGTAGGAAGACACGCTCGCCCTCTCCCACAAACACAACAAAAAAAGCACATCTACAGAATAAATGACTCGCACAGAACAGCAACCAATCGCTGGCAGAGGAACCTAAACTCCAATAACGGCAAGAAATTCGTGACATTATTGGGCAGAACAGGAGAAAAGAGGAGAGTGAGAGAAGGCGAATCCGAGCGAGATGGGGGCTCCCAAAAGGGAACTGCGGAGGAGAAAGGGATCCCGCACCCTAGAAAGTCACCTACCGGGCGAAAGATCAAACGAACCGGAGGAATCTCCAGATGCAGAGAAGAGTGTAGCAGTAAGTTGGAGTACGGAAAAGCCGATCAAGAAGCCAACGGACCATCTGAACT…	T	6	XP3,XP6,LW4,DU5	-	-	intergenic_variant	MODIFIER	-	-	-	0	2	2	4
sv_00625	1	37618638	37618929	291	DEL	TAAAAAATAAAAAATACGGAGTTCCCGTCGTGGCGCAGTGGTTAACGAATCCGACTAGGAACCATGAGGTTGTGGGTTCGGTCCCTGCCCTTGCTCAGTGGGTTAACGATCCGGCGTTGCCGTGAGCTGCGGTGTAGGTTGCAGACGCGGCTCGGATCCCACGTTGCTGTGGCTCTGGCGTAGGCCGGTGGCTACAGCTCCGATTCAACCCCTAGCCTGGGAACCTCCATATGCCGCTGGAGCGGCCCAAGAAATAGCAACAACAACAACAACAATAAAAAAATAAAAAATA	T	11	WXP4,XP2,LW4	-	-	intergenic_variant	MODIFIER	-	-	-	1	1	1	3
sv_00626	1	37653588	37653937	349	DEL	TAACTTTAACATTTTTTTTTTAATTTTATTCCCCATCCCCCTTTGCTCTTCCTCTCTTTTTTTTAATTTTTTTTTATTTTTTGTCTTTTTGTCTTTTGTTGTTGTTGTTGCTATTTCTTGGGCCGCTCCCGCGGCATATGGAGGTTCCCAGGCTAGGGGCTGAATCGGAGCTGTAGCCACCGGCCTACGCCAGAGCCACAGCAACGCGGGATCCGAGCCGCGTCTGCAACCTACACCACAGCTCACGGCAACGCCGGATCGTTAACCCGCTGAGCAAGGGCAGGGACCGAACCCGCAACCTCATGGTTCCTAGTCGGATTCGTTAACCACTGCGCCACGACGGGAACTCC	T	20	WXP3,WXP4,WXP6,WXP7,XP1,XP2,XP3,XP5,XP6,XP7,LA5,LA7,DU6	ENSSSCG00000004224	ENSSSCT00000004669.4	intron_variant,feature_truncation	MODIFIER	HDDC2	protein_coding	INTRON=4/5,STRAND=1	4	6	3	13
sv_00627	1	37664396	37664698	302	DEL	TACTTTTTTTTTTTTTTTTTATTTTTTTTTTGTCTTTTGTCTTTTTGTTGTTGTTGTTGTTGCTATTTCTTGGGCCGCTCCCGCGGCATATGGAGGTTCCCAGGCTAGGGGTCGAATCGGAGCTGTAGCCACTGGCCTACACCAGAGCCACAGCAACACGGGATCCGAGCCGCGTCTGCAACCTACACCACAGCTCACGGCAACGCCGGATCGTTAACCCACTGAGCAAGGGCAGGGACCGAACCCGCAACCTCATGGTTCCTAGTCGGATTCGTTAACCACTGCGCCACAACGGGAACTCCA	T	13	WXP1,WXP3,WXP4,WXP6,XP1,XP2,XP3,XP5,XP6,XP7,LW4,LW5,LA5,LA6,LA7,DU2,DU5	ENSSSCG00000004224	ENSSSCT00000004669.4	downstream_gene_variant	MODIFIER	HDDC2	protein_coding	DISTANCE=1556,STRAND=1	4	6	7	17
sv_00628	1	37698034	37698348	314	DEL	TTGCTATCTTTTCTTTTTTTTTTTTTTTTTTGTCTTTTGTCTCTTTTGTTGTTGTTGTTGTTGTTATTATTGTTGCTATTTCTTGCGCCGCTCCTGCGGCATATGGAGGTTCCCAGGCTAGGGGTTGAATCGGAGCTGTAGCCACCAGCCTACACCAGAGCCACAGCAACGCGGGATCCGAGCCGCGTCTGCAACCTACACCACAGCTCACGGCAACGCCGGATCGTTAACCCACTGAGCAAGGGCAGGGACCGAACCCGCAACCTCATGGTTCCTAGTCGGATTCGTTAACCACTGCGCCACGACGGGAACTCC	T	9	WXP6,WXP7,XP1,XP3,XP6,XP7	ENSSSCG00000004225	ENSSSCT00000004670.4	intron_variant,feature_truncation	MODIFIER	TPD52L1	protein_coding	INTRON=2/5,STRAND=-1	2	4	0	6
sv_00629	1	37699537	37699852	315	DEL	TTGAAAATGACCAATCTCAGGGAGTTCCCGTCGTGGCGCAGTGGTTAACGAATCCGACTAGGAACCATGAGGTTGCGGGTTCGGTCCCTGCCCTTGCTCAGTGGGTTAATGATCCGGCGTTGCCGTGAGCTGTGGTGTAGGTTGCAGACGCGGCTCGGATCCTGTGTTGCTGTGGCTCTGGCGTAGGCCAGCGGCTACAGCTCTGATTCAACCCCGAGCCTGGGAACCTCCATATGCCGAGGGAGCGGCCCAAGAAATAGCAACAACAACAACAACAACGACAAAAAGACAAAAGACAAAAAAAAAAAAAAGAAA	T	17	WXP1,WXP3,WXP4,WXP5,WXP6,WXP7,XP1,XP2,XP3,XP4,XP5,XP6,LW4,LW5,LW6,LW7,LA6,LA7,DU1,DU2,DU6,DU7	ENSSSCG00000004225	ENSSSCT00000004670.4	intron_variant,feature_truncation	MODIFIER	TPD52L1	protein_coding	INTRON=2/5,STRAND=-1	6	6	10	22
sv_00630	1	37822342	37822675	333	DEL	TTAAATATAAGTTTGTCAGGAGTTCCCGTCGTGGCGCAGTGGTTAACGAATCCGACTAGGAACCATGAGGTTGCGGGTTCGGTCCCTGCCCTTGCTCAGTGGGTTAACGATCCAGCGTTGCCGTGAGCTGTGGTGTAGGTTGCAGACGCGGCTCGGATCCCGCGTTGCTGTGGCTCTGGCGTAGGCCGGTGGCTACAGCTCCGATTCAACCCCTAGCCTGGGAACCTCCATATGCCGCAGGATCGGCCCAAGAAATAGCAACAACAACAACAACAAAAAGACAAAAGACAAAAAAAAAAATAAATAAATAAATAAAAGTTAAAAAAAAAATAAA	T	20	WXP2,WXP3,WXP4,WXP5,WXP7,XP2,XP3,XP4,XP5,XP6,XP7,LW6,LW7,LA7	ENSSSCG00000021149	ENSSSCT00000022320.3	intron_variant,feature_truncation	MODIFIER	RNF217	protein_coding	INTRON=2/5,STRAND=-1	5	6	3	14
sv_00631	1	37826095	37826393	298	DEL	TAGAAATCTTGATTAGGAGTTCCCATCGTGGCGCAGTGGTTAACAAATCCGACTAGGAACCATGAGGTTGCGGGTTCGGTCCCAGCCCTTGCTCAGTGGGTTAACGATCCAGCGTTGCCGTGAGCTGTGGTGTAGGTTGCAGACGCGGCTCGGATCCCGCGTTGCTGTGGCTCTGGCGTAGGCCAGTGGCTACAGCTCCGATTCAACCCCTAGCCTGGGAACCTCCATGTGCCCCGGGAGCGGCCCAAGAAATAGCAACAACAACAACAACAAAAGACAAAAGACAAAAAAAAAAAAAA	T	10	XP6,LA7	ENSSSCG00000021149	ENSSSCT00000022320.3	intron_variant,feature_truncation	MODIFIER	RNF217	protein_coding	INTRON=2/5,STRAND=-1	0	1	1	2
sv_00632	1	37838152	37838281	129	DEL	TTTTTTTTTTTTTTTTTTTTTTTTTTTTTTTTTTTTTTTTGTTGCTATTTCTTGCGTCGCATATAGTCAGTATGTCAGTGTCTACATTTCTATAGTACTATGTTCTGACCAAGTATGTTTTTTTTTCACA	T	13	WXP1,XP3,XP4,XP6,XP7,LW6,LW7,LA7,DU6	ENSSSCG00000021149	ENSSSCT00000022320.3	intron_variant,feature_truncation	MODIFIER	RNF217	protein_coding	INTRON=1/5,STRAND=-1	1	4	4	9
sv_00633	1	37895457	37895457	71	INS	T	TGAGCCATCTCGAATCAACCTCCCTCTGCTCCCTGCTCTAGAAATAAGCACACCTGGGGGCCTGGCTCTGCA	3	WXP7,XP1	ENSSSCG00000021149	ENSSSCT00000022320.3	intron_variant,feature_elongation	MODIFIER	RNF217	protein_coding	INTRON=1/5,STRAND=-1	1	1	0	2
sv_00634	1	37913729	37913792	63	DEL	TCCTAGTAAATGCTGTTTTCTCCCAATCCTAGTGTTTATTGTTTTAAAGACAGGGGACAAGAAG	T	6	WXP1,XP3,XP5,LW5,LA4,DU7	ENSSSCG00000021149	ENSSSCT00000022320.3	upstream_gene_variant	MODIFIER	RNF217	protein_coding	DISTANCE=1607,STRAND=-1	1	2	3	6
sv_00635	1	38125474	38125602	128	DEL	CTCTGAAGAATGCAAACAGAGTGAATAATATCCACCTATCTTCGTCTGCAAGAGCACTAGTGAAAAAAATAAAAAATTGCATACAACAATAAAGAAAGTGCTCTTAAGAAGAAAATTCACAACTATCAA	C	11	WXP1,WXP5,WXP6,XP1,XP5,XP6,XP7,LW1,LW3,LW6,LW7,LA1,LA2,LA3,LA5,DU3,DU5,DU6	ENSSSCG00000036607	ENSSSCT00000046717.2	intron_variant,feature_truncation	MODIFIER	NKAIN2	protein_coding	INTRON=2/4,STRAND=-1	3	4	11	18
sv_00636	1	38365301	38365608	307	DEL	TAAATATATTGGGAAATTCGGAGTTCCCGTCGTGGCGCAGTGGTTAACGAATCCGACTAGGAACCATGAGGCTGCGGGTTCGATCCCTGCCCTTGCTCAGTGGGTCAAGGTTCCGGCGTTGCCGTGAGCTGTGGTGTAGGTCACAGACGCGGCTCGGATCCTGCGTTGCTGTGGCTCTGGCGTAGGCTGGCAGCTACAGCTCCGATTCGACCTCTAGCCCGGGAACCTCCATATGCCGCAGGAGCGGCCCAAGAAATGGCAAAAAGACAAAAAAAAAAAAAAAAAAAAAAAAAAAAAAAAAAAAAAAA	T	17	WXP1,WXP3,WXP4,WXP5,WXP6,WXP7,XP2,XP3,XP4,XP5,XP6,XP7,LW1,LW2,LW3,LW4,LW5,LW6,LW7,LA1,LA2,LA5,LA6,LA7,DU1,DU2,DU3,DU5,DU6	ENSSSCG00000036607	ENSSSCT00000086076.1	intron_variant,feature_truncation	MODIFIER	NKAIN2	protein_coding	INTRON=3/4,STRAND=-1	6	6	17	29
sv_00637	1	38368299	38368600	301	DEL	GAAAAAGAAAAGAGGAGTTCCCGTCGTGGCGCAGTGGTTAACGAATCCGACTAGGAACCATGAGGTTGCGGGTTCGGTCCCTGGCCTTGCTCAGTGGGTTAGCGATCCGGCGATGCCGTGAGCTGTGGTGTAGGTTGCAGACGCGGCTCGGATCCTGCGTTGCTGTGGCTCTGGCGTAGGCCAGTGGCTACAGCTCTGATTCAACCCCTAGCCTGGGAACCTCCATATGCCGCGGGAGCGGCCCAAAAAATAGCAACAACAACAACAACAAAAGACAAAAAGACAAAAGACAAAAAAAAAAA	G	22	WXP3,WXP4,WXP5,WXP6,WXP7,XP1,XP2,XP3,XP4,XP5,XP6,XP7,LW5,LW7,LA5,LA6,LA7,DU1,DU2,DU3,DU4,DU5	ENSSSCG00000036607	ENSSSCT00000086076.1	intron_variant,feature_truncation	MODIFIER	NKAIN2	protein_coding	INTRON=3/4,STRAND=-1	5	7	10	22
sv_00638	1	38458721	38465020	6299	DEL	ACCTCTAAGGTTTTTTTTTGTCTTTTGTCTTTTTTTTTTTTTTTTTTTCTTGTTGTTGTTGTTGCTATTTCTTGGGCCGCTCCCGCGGCATATGGAGATTCCCAGGCTAGGGGTTGAATCGGAGCTGTAGCCACCGGCCTACGCCAGAGCCACAGCAACGCGGGATCCGAGCCGCGTCTGCAACCTACACCACAGCTCACGGCAACGCTGGATCGTCAACCCACTGAGCAAGGGCAGGGACCGAACCCGCAACCTCATGGTTCCTAGTCGGATTCGTTAACCACTGCGCCACTGAAAGGATGAAAATGCAACCTAACCCTCCCAGAACCCAGGAAGTTAATAAAAAGCTCTAAATGCCCCCGAATTCCAGACCCTGCTGGCTGCCAGTAAATAGGTAGA…	A	5	XP3,XP6,LW5,DU5	ENSSSCG00000036607	ENSSSCT00000086076.1	intron_variant,feature_truncation	MODIFIER	NKAIN2	protein_coding	INTRON=3/4,STRAND=-1	0	2	2	4
sv_00639	1	38528603	38528691	88	DUP:TANDEM	CAGCACCTGGAATTCTGAATATTTCTGGCAAAGATAATTGTAAGAGCTGTGCCCAGAGAATCTGGGAGTCAAGACCATAGTTGCTCATT	CAGCACCTGGAATTCTGAATATTTCTGGCAAAGATAATTGTAAGAGCTGTGCCCAGAGAATCTGGGAGTCAAGACCATAGTTGCTCATTAGCACCTGGAATTCTGAATATTTCTGGCAAAGATAATTGTAAGAGCTGTGCCCAGAGAATCTGGGAGTCAAGACCATAGTTGCTCATT	12	LW6,LW7,LA7,DU7	ENSSSCG00000036607	ENSSSCT00000050380.2	intron_variant	MODIFIER	NKAIN2	protein_coding	INTRON=2/2,STRAND=-1	0	0	4	4
sv_00640	1	38528603	38528603	88	INS	C	CAGCACCTGGAATTCTGAATATTTCTGGCAAAGATAATTGTAAGAGCTGTGCCCAGAGAATCTGGGAGTCAAGACCATAGTTGCTCATT	5	WXP1,WXP3,WXP5,XP2,XP3,XP5,XP6,XP7,LW4,LW5	ENSSSCG00000036607	ENSSSCT00000050380.2	intron_variant,feature_elongation	MODIFIER	NKAIN2	protein_coding	INTRON=2/2,STRAND=-1	3	5	2	10
sv_00641	1	38639611	38639932	321	DEL	GAAAAGAAACAAACAGGAGTTCCCGTCGTGGCGCAGTGGTTAACGAATCCGACTAGGAACCATGAGGTTGCGGGTTCGGTCCCTGCCCTTGCTCAGTGGGTTAACGATCCGGCGTTGCCGTGCGCTGTGGTGTAGGTTGCAGACGCGGCTCGGATCCCGCGTTGCTGTGGCTCTGGCGTAGGCTGGTGGCTACAGCTCCGATTCGACCCCTAGCCTGGGAACCTCCATATGCCGCGGGAGCGGCCCAAGAAATAGCAACAACAACAACAAAAAGACAAAAGACAAAAAAAAAAAACAAAAAAAAAAAAAAAAAAAAAAAAAA	G	21	WXP4,WXP5,WXP6,WXP7,XP2,XP3,XP4,XP5,XP6,XP7,LW5,LW6,LW7,LA6,LA7,DU2,DU4,DU5,DU6,DU7	ENSSSCG00000036607	ENSSSCT00000050380.2	intron_variant,feature_truncation	MODIFIER	NKAIN2	protein_coding	INTRON=1/2,STRAND=-1	4	6	10	20
sv_00642	1	39022674	39022978	304	DEL	ACAAGTAAGTATTTTTTTTTTTTTTTTTGTCTTTTTTGTCTTTTTGTCTTTTGTTGTTGTTGTGGCTATTTCTTGGGCCGCTCCCGCGGCATATGGAGGTTCCCAGGCTAGGGGTTGAATCGGAGCTGTAGCCACCGGCCTACGCCAGAGCCACAGCAACGCGGGATCCGAGCCGCGTCTGCAACCTACACCACAGCTCACGGCAACGCCGGATCGTTAACCCACCGAGCAAGGGCAGGGACCGAACCCGCAACCTCATGGTTCCTAGTCGGATTCGTTAACCACTGCGCCACGACGGGAACTCC	A	12	XP6,LW7	ENSSSCG00000036607	ENSSSCT00000086076.1	intron_variant,feature_truncation	MODIFIER	NKAIN2	protein_coding	INTRON=1/4,STRAND=-1	0	1	1	2
sv_00643	1	39083908	39084358	450	DEL	GTCCATATGCCTCAGGTGTGGCCCTAAAAAAAGTAAAAAAAAAAAAATTAAACCTCGTCAAAATTAAAACTTCTGTTCTCTGTAAGGCCAGGTGAAGAGGATGAAAAGATATACCACAGGTTAGAAGAAGAAATTTTCAAATGCACCTGACAAAGGGCTAGTATCTGGAATATAAAAAAAATTTTCAAACTCCAACATTATGATAAATCCAGTTAGAAAATGAGCAATGTTATTCATCTCTAATAAACATTTCACCAAAAGGACATACATTTGACAAATGCTATAGACTGGATAATTGTGTCCAGTCTATATTCATATGTTGAAACCTAGTCCCAAAATATGATTCTATTTGGAAGCAGAGTATCTGAAAGGTAATTAGGTTGTGAGTGTGGGGCTCAC…	G	19	WXP6,WXP7,XP3,XP6,LW5	-	-	intergenic_variant	MODIFIER	-	-	-	2	2	1	5
sv_00644	1	39186466	39186523	57	DEL	GGAACTCCTTTTTTTTTTTTTTTTTTTTTTGGAATAATAATATTGCAGCTATGTTTTA	G	20	WXP5,WXP7,XP3	ENSSSCG00000027613	ENSSSCT00000029492.3	intron_variant,feature_truncation	MODIFIER	TRDN	protein_coding	INTRON=1/8,STRAND=1	2	1	0	3
sv_00645	1	39485786	39486082	296	DEL	TTAAAATGGCGGAGTTCCCGTCGTGGCGCAGTGGTTGACGAATCTGACTAGGAACCATGAGGTTGCGAGTTCGGTCCCTGCCCTTGCTCAGTGGGTTGACGATCCGGCGTTGCCGTGGGCTGTGGTGTAGGTTGCAGGCGCGGCTCGGATCCCGAGTTGCTGCGGCTCTGGCGTAGGCTGGTGGCTATGGCTCCGATTGGACCCCTAGCCTGGGAACCTCCGTATGCCGAGGGAGCGGCCCAAGAAATAGCAAAAAAAAAAAAAAAAAAAAAATTAAAAAAAAAATAAATAAATAAA	T	11	WXP3,WXP4,WXP6,WXP7,XP1,XP2,XP3,XP5,XP6	ENSSSCG00000027613	ENSSSCT00000077226.1	intron_variant,feature_truncation	MODIFIER	TRDN	protein_coding	INTRON=23/40,STRAND=1	4	5	0	9
sv_00646	1	39557186	39557670	484	DEL	TGTATTGTGCCGGGGCCAGCTCAGCAGGATGGGGCTGAAGAACGGGTGCTGTGGAACTTAAGGAAAAATAGTTAACATAAAATAAGACACAGAGACATTTATCTTAAGTAAAGGTGGGAGCCAGGGACTCAAGGTCTCAGGGACCAAGAGCGCGGGACTCAAGGTCTCAGGGACCAAGAGTGCCGGGGAACTCCAGATCTCAGGGACCAAGAGCACGGGACTCAAGGTCTCAGGGACCAAGAGCACCTGCCTCAAGAAACCACACTGCTTTTATTGTGAGATTAAGTGAGGAGTGGCTATGGGTGGATCATACAGGGTTTACTATTATATAAGTTCTTTTACTATTTAAAAAGCCACTTAGGTGGTAAAGGGTTAAGCTCTTACTCTGACCTCTAGGCA…	T	19	WXP4,XP2,XP3,XP4,XP6,XP7,LW4,LW5,LW7,LA6,LA7,DU7	ENSSSCG00000027613	ENSSSCT00000077226.1	intron_variant,feature_truncation	MODIFIER	TRDN	protein_coding	INTRON=38/40,STRAND=1	1	5	6	12
sv_00647	1	39607547	39607613	66	DEL	TGTTCAACAGGTTGTCTTTGCCTAAGTGTCCATTCAAAATTGCATCTGCACTGGAAATATTTTAGCA	T	7	WXP3,WXP5,XP4,XP7	-	-	intergenic_variant	MODIFIER	-	-	-	2	2	0	4
sv_00648	1	39639162	39639452	290	DEL	TCATGTTATCTATTTTTTTTTTTGTCTTTTTGTCTTTTGTTGTTGTTGTTGCTATTTCTTGGGCCGCTCCCGTGGCATATGGAGGTTCCCAGGCTAGGGGTTGAATCGGAGCTGTAGCCACCGGCCTACGCCAGAGGCACAGCAACGCAGGATCCGAGCCGCGTCTGCAACCTACACCACAGTGCACAGCAACGCCAGATCCTCAACCCACTGAGCAAGGGCAGGGACCAAACCCGCAACCTCATGGTTCCTAGTCAGACTCGTTAACCACTGCGCCACGACGGGAACTCC	T	19	WXP6,WXP7,XP3,XP5,XP6,XP7,LW4,LW5,LW6,LW7,LA6,DU7	-	-	intergenic_variant	MODIFIER	-	-	-	2	4	6	12
sv_00649	1	39653431	39653710	279	DEL	TACATGACCCTTTTTTTTTTTTAATTTTTTGTCTTTTTGCTATTTCTTGGGGCGCTCCCATGGCATATGGAGGTTCCCAGGCTAGGGGTGGAATCGGAACTGTAGCTGCCAGCCTACGCCAGAGCCACAGCAACTCGGGATCCGAGCCGCATCTGCAACCTACACCACAGCTCATGGCAACGCCGGATCGTTAACCCACTGAGCAAGGGCAGGGACCGAACCCGCAACCTCATGGTTCCTAGTCGGATTCGTTAGCCACTGTGCCACGACGGGAACTCCA	T	23	WXP2,WXP5,WXP6,WXP7,XP3,XP5,XP6,XP7,LW4,LW5,LW7,LA6,LA7,DU7	-	-	intergenic_variant	MODIFIER	-	-	-	4	4	6	14
sv_00650	1	39674462	39674779	317	DEL	AAAAACAGGATGCTGGAGTTCCCGTCGTGGCGCAGTGGTTAACGAATCCGACTAGGAACCATGAGGTCGCGGGTTCGGTCCCTGCCCTTGCTCAGTGGGTTAACGATCCGGCGTTGCCGTGAGCTGTGGTGTAGGTCGCAGACGCGGCTCGGATCCCGCATTGCTGTGGCTCTGGCGTAGGCCGGTGGCTACAGGTCCGATTCAACCCCTAGCCTGGGAACCTCCATATGCCGCGGGAGCGGCCCAAGAAATAGCAACAACAGCAACAACAACAACAACAGACAAAAAGACAAAAGACAAAAAAAAAAAAAAAAAAAC	A	26	WXP3,WXP4,WXP5,WXP6,WXP7,XP1,XP2,XP3,XP4,XP5,XP6,LW4,LW5,LW7,LA6,LA7,DU7	ENSSSCG00000046850	ENSSSCT00000073266.1	non_coding_transcript_exon_variant,intron_variant,feature_truncation	MODIFIER	-	lncRNA	EXON=2/2,INTRON=1/1,STRAND=-1	5	6	6	17
sv_00651	1	39700428	39700717	289	DEL	TAGCACACAGTTTTTTTTTGTTTTGTTTTGTCTTTTGTCTTTTTTTGTTGTTATTTCTTGGGCCGCTCCCGCGGCATATGGAGGTTCCCAGGCTAGGGGTCTAATCGGAGCTGTAGCTACGGCCTACGCCAGGGCCACAGCAACGCGGGATCCGAGCCGCGTCTGCAACCTACACCACAGCTCACAGCAACGCCGGATCGTTAACCCACTGAGCAAGGGCAGGGACCGAACCCGCAACCTCATGGTTCCTAGTCGGATTCGTTAACCACTGCACCACGATGGGAACTCCC	T	21	WXP1,WXP2,WXP3,WXP4,WXP5,WXP6,WXP7,XP1,XP3,XP5,XP6,XP7,LW6,LW7,DU7	ENSSSCG00000004232	ENSSSCT00000051787.2	intron_variant,feature_truncation	MODIFIER	CLVS2	protein_coding	INTRON=3/5,STRAND=-1	7	5	3	15
sv_00652	1	39771859	39772152	293	DEL	TTAAACTTCCATCTTTTTTCATGGAGTTCCCGTCGTGGTGCAGTGGTTAACGAATCCGACTAGGAACCATGAGGTTGCGGGTTCGGTCCCTGCCCTTGCTCAGAGGGTTAACGATCCGGCGTTGCCGTGAGCTGTGGTGTAGGTTGCAGACGCGGCTCGGATCCCGCGTTGCTGTGGCTCTGGCGTAGGCGGGTGGCTGCAGCTCCGATTAGACCCCTAGCCTGGGAACCTCCATATGCCGCGGGAGCGGCCCAAGAAATAGCAAAAAGACAAAAATAAATAAATAAATAAAAA	T	14	WXP2,WXP3,WXP4,WXP5,WXP7,XP1,XP7,DU7	-	-	intergenic_variant	MODIFIER	-	-	-	5	2	1	8
sv_00653	1	39779861	39780005	144	DEL	CTAGCCTAGGAACTTCCATATGCCATAGGTGTGGCCCTAAAAAGCAAAAGCAAAAAAAAAAAAAAAAAAAAAAAAAGACATTAGATGTTTTGGAAAAGAAAGGGAGATGTAAGTTATAACAATTACCGCTAACTCTTTCTGCAGG	C	15	WXP1,WXP2,WXP3,WXP4,WXP5,WXP7,XP2,XP3,XP4,XP5,XP6,XP7,LW4,LW5,LW6,LW7,LA6,LA7	-	-	intergenic_variant	MODIFIER	-	-	-	6	6	6	18
sv_00654	1	39792249	39792410	161	DEL	TTCTCTTTAGTTTTTGTTTGTTTGTTTGTTTGTTTGTTTTTATTTATTTTCCCACTGTACAGCAAGGGGGTCAGGTTATCCTTACATGTATACATTACAATTACATTTTTCCCCCAGCCTTTCTTCTGTTGCAACATGAGCATCTAGACAAAGTTCTCAATG	T	20	WXP2,WXP4,WXP5,WXP6,WXP7,XP1,XP2,XP3,XP5,XP6,XP7,LW4,LW5,LW6,LW7	-	-	intergenic_variant	MODIFIER	-	-	-	5	6	4	15
sv_00655	1	39794392	39794541	149	DEL	ACATAACAACATTTTTTTTTTCCCACTGTACAGCAAGGGGGTCAGGTTATCCTTACATGTATACATTGCAATTACAGTTTTTCCCCCACTCTCTCTTCTGTTGCAACATGAGTATCTAGACATAGTTCTCAATGCTATTCAGCAGGATCT	A	12	WXP1,WXP6,WXP7,XP1,XP2,XP3,XP4,XP5,XP6,XP7,LW2,LW3,LW6,LW7,LA2,LA4,LA5,LA6,LA7	-	-	intergenic_variant	MODIFIER	-	-	-	3	7	9	19
sv_00656	1	39813129	39813404	275	DEL	TTAAAAAAAGCCAGAGGAGTTCCCGTCGTGGCGCAGTGGTTAATGAATCCGACTAGGAACCATGAGGTTGCGGGTTCGGTCCCTGCCCTTGCTCAGTGGGTTAACAATCTGGCGTTGCCGTGAGCTGTGGTGTATGTTGCAGACGCGGCTCGGATCCCGCGTTGCTGTAGCTCTGGCGTAGGCCAGTGGCTACAGCTCCGATTCGACCCCTAGCCTGGGAACCTCCATATGCCGCGGGAGCGGCCCAAAGAAATAGCAAAAAGACAAAAAAAAAAA	T	13	WXP7,XP3,LW5,LW6,LA6,LA7,DU7	-	-	intergenic_variant	MODIFIER	-	-	-	1	1	5	7
sv_00657	1	40011606	40011915	309	DEL	GAAAAATGGGTAGAAGGAGTTCCCGTTGTGGCGCAGTGGTTAACGAATCCGACTAGGAACCATGAGGTTGCGGGTTCGGTCCCTGCCCTTGCTCAGTGGGTTAACGATCCGGCGTTGCCGTGAGCTGTGGTGTAGGTTGCAGACGCGGCTCAGATCCTGCGTTGCTGTGGCTCTGGTGTAGGCCGGTCGCTACAGCTCCGATTCAACCCCTAGCCTGGGAACCTCCATATGCCACGGGAGCGGCCCAAGAAATAGCAACAACAACAACAACAACAAAAGACAAAAAAAGGCAAAAAAAAAAAAAAAAAAA	G	19	WXP3,WXP4,XP1,XP3,XP4,XP5,XP6,XP7,LW6,LW7,LA7	ENSSSCG00000004236	ENSSSCT00000041271.2	intron_variant,feature_truncation	MODIFIER	PKIB	protein_coding	INTRON=1/5,STRAND=-1	2	6	3	11
sv_00658	1	40015892	40016520	628	DEL	TTATATATCCTTTCTTTTTTTTTTTTTTTTTTTTATTTATTTATTTTTTTTTTGTCTTTTTTGTCTTTTTGTTGTTATTGTTGTTGTTGTTGTTGTTGTTGCTATTTCTTGGGCCGCTCCCGCGGCATATGGAGGTTCCCAGGCTAGGGGTCGAATCGGAGCTGTAGCCACCGGCCTACGCCAGAGCCATAGCAACGCGGGATCCGAGCCGTGTCTGCAGCCTACACCACAGCTCACGGCAACGCCGGATCGTTAACCCACTGAGCAAGGGCAGGGACCGAACCCGCAACCTCATGGTTCCTAGTCGGATTCGTTAACCACTGCGCCACGACGGGAACTCCAAAGTCATGCTTTTTTTTTTTTTTTTTTTTTGTCTTTTTGCCATTTCTTGGGCCTCTT…	T	19	WXP3,WXP4,WXP5,WXP6,WXP7,XP1,XP2,XP3,XP5,XP6,LW7	ENSSSCG00000004236	ENSSSCT00000041271.2	intron_variant,feature_truncation	MODIFIER	PKIB	protein_coding	INTRON=1/5,STRAND=-1	5	5	1	11
sv_00659	1	40040224	40040516	292	DEL	GAAGCAGTACAGGAGTTCCCGTCGTGGCGCAGTGGTTAACGAATCCGACTAGGAACCATGAGGTTGCGGGTTCGGTCCCTGCCCTTGCTCAGTGGGTTAACCCTTGCTCAGTGGGTTAACGATCCGGCGTTGCCGTGAGCTGTGGTGTAGGTTGCAGACATGGCTCGGATCCCGCGTTGCTGTGGCCCTGGCATAGGCCAGTGGCTACAGTTCCGATTTGACCCCTAGCCTGGGAACCTCCATATGCCGCGGGAGTGGCCCAAAGAAAATAGCAAAAAGACAAAAAAAAAAAA	G	20	WXP1,WXP4,WXP5,WXP6,WXP7,XP1,XP4,XP7,LW5,LW6,LW7,DU7	-	-	intergenic_variant	MODIFIER	-	-	-	5	3	4	12
sv_00660	1	40040810	40041123	313	DEL	TAAAGAATAACCACATCTGGAGTTCCCATCGTGGCGCAGTGGTTAACGAATCCGACTAGGAACCATAAGGTTGCGGGTTCGGTCCCTGCCCTTGCTCAGTGGGTTAACGATCCGGCGTTGCCGTGAGCTGTGGTGTAGGTTGCAGACGCGGCTCGGATCCCGCGTTGCTGTGGCTCTGGCGTAGGCCGGTGGCTACAGCTCCGATTAGACCCCTAGTCTGGGAACCTCCATATGCCGCGGGAGCGGCCCAAGAAATAGCAACAACAGCAGCAACAACAACAAAAGACAAAAAAAAAAAAAAAAAAAAAAAAAAA	T	14	WXP2,WXP3,WXP4,WXP6,XP1,XP2,XP4,XP5,XP7,LW5,LW6,LW7,DU7	-	-	intergenic_variant	MODIFIER	-	-	-	4	5	4	13
sv_00661	1	40071213	40071568	355	DEL	ATATCCCTTAGCAACAATAACAACAACAAAAAAGACAAAAGACCAAAAAAAAAAAAAAAAAAAAGGAGTTCCCGTCGTGGCGCAGTGGTTAACGAATCCGACTAGGAACCATGAGGTTGCGGGTTCGGTCCCTGCCCTTGCTCAGTGGGTTAACGATCCGGCGTTGCCGTGAGCTGTGGTGTAGGTTGCAGACGCAGCTCTGATCCCGCGTTGCTGTGGCTCTGGCGTAGGCCGGTGGCTACAGCTCCGATTCAACCCCTAGCCTGGGAACCTCCATATGCCGCGGGAGCGGCCCAAGAAATAGCAACAATAACAACAACAAAAAAGACAAAAGACCAAAAAAAAAAAAAAAAAAC	A	10	XP3,XP6,LW6	-	-	intergenic_variant	MODIFIER	-	-	-	0	2	1	3
sv_00662	1	40096788	40097297	509	DEL	CCAGACATTGTCTCTGTGGGTTCTCTCCCTGGCCTAGCTCAGTGGGTTAGGATCTCTTTTACTTGTATACTACTCCTTCTTAATCAAATTTGGTAGATTTTCTGATTTTCCATAATTGCAGAGTCCCTAAAATGTCTTCCCAAGGATTGTGATAAAACAAACTTGTTTACCTTCTGATCTTTATAGTGAAAATACCACTTTATTATTGGATTGCATACAAGAGGTCAATCTCATATAAATGACTATAAGCCTGCCAGAGGAAGAGACATGGCTCTAAGATCAGAAACTGCAACTGAATAGGAGATCTCTAGATGGTCGATTAAGATTAAATGCTATCTGGGAGTTCCCATTATGGCTCATCGGGTTACCAGCCCAACTAGTATCCATGAGGATGTGGGT…	C	7	WXP3,WXP5,XP3,XP5,XP6,LW6,LA6,LA7	ENSSSCG00000004237	ENSSSCT00000004682.4	upstream_gene_variant	MODIFIER	SERINC1	protein_coding	DISTANCE=2056,STRAND=1	2	3	3	8
sv_00663	1	40110312	40110621	309	DEL	CAGAATATCAGTCTTTGGGAGTTCCCGTCGTGGCGCAGTGGTTAACGAATCCGACTAGGAACCATGAGGTTGCGGGTTCGGTCCCTGCCCTTGCTCAGTGGGTTAACGATCCGGCGTTGCCGTGAGCTGTGGTGTAGACTGCAGACGTGGCTCGGATCCCGAGTTGCTGTGGCTCTGGTGTAGGCCGGTGGCTACAGCTCCGATTGGACCCCTAGCCTGGGAACCTCCATATGCCGCGGGAGCAGCCCAAGAAATAGCAACAACAACAACAACAAAAAGACAAAAGACAAAAAAAAAAAAAAAAAAAAAA	C	17	WXP5,WXP7,XP4,LW5,LW6,LW7,LA7,DU7	ENSSSCG00000004237	ENSSSCT00000004682.4	intron_variant,feature_truncation	MODIFIER	SERINC1	protein_coding	INTRON=1/9,STRAND=1	2	1	5	8
sv_00664	1	40278777	40279072	295	DEL	GTCCAAGTAATATGTTTTATTTTTTTTTTTTTTTTTTTTTTTTTTTTTTTGTCTTTTTGCTATTTCTTGGGCCGCTCCCGCGGCATATGGAGGTTCCCAGGCTAGGGGTCTAATCGGAGCTGTAGCTGCCAGCCTATGCCAGAGCCACAGCAACGCGGGATCCGAGCCGTGTCTGCGACCTACACCACAGCTCACGGCAACGCCGGATCGTTAACCCACTGAGCACGGGCAGGGACCGAACCCGCAACCTCATGGTTCCTAGTCGGATTCGTTAACCACTGCGCCACGACGGGAAC	G	14	WXP3,WXP4,WXP5,WXP6,WXP7,XP1,XP2,XP3,XP4,XP5,XP6,XP7,LW1,LW3,LW4,LW5,LA1,LA2,LA4,LA5,LA6,LA7,DU1,DU3,DU4,DU5,DU7	-	-	intergenic_variant	MODIFIER	-	-	-	5	7	15	27
sv_00665	1	40286263	40286526	263	DEL	GTTCCCATCGGGCACAGCGGAAACGAACCCAACTAGGAACCATAAGGTTTTGGGTTCGATCCCTGGCCTCGCTCAGTGTGTTAAGAATCCGGCATTGCTGTGAGCTGTGGTGTAGGTCGCAGACACGGTTTGGATCCCGTGTTCCTGTGGCTGTGGTGCAGGCCGACGGCTACAGCTCCGATTAGACTCCTAGCCTGGGAACCTCCATATGCCGTGGGTGTGGCCCTAGAAAAGACAGAAAAAAAAAAAGTATATATATATATA	G	8	WXP6,XP3	-	-	intergenic_variant	MODIFIER	-	-	-	1	1	0	2
sv_00666	1	40318148	40318462	314	DEL	ACCTAATTTTATTTTATTTTATTTTATTTTATTTATTTATTTATTTTTGTCGTTGTTGTTATTGTTGTTGTTGTTGCTATTTCTTGGGCCGCTCCCGCGGCATATGGAGGTTCCCAGGCTAGGGGTTGAATCGGAGCTGCAGCCACCGGCCTACGCCAGAGCCACAGCAACGCAGGATCCGAGCCGCGTCTGCAACCTACACCACAGCTCACGGCAACGCCGGATCGTTAACCCACTGAGCAAGGGCAAGGACCGAACCCGCAACCTCATGGTTCCTAGTCGGATTCGTTAACCACTGCGCCACGACGGGAACTC	A	5	LW4,LW5	-	-	intergenic_variant	MODIFIER	-	-	-	0	0	2	2
sv_00667	1	40401585	40401903	318	DEL	TGGCAAATTTTTTTTTTTTTTTTTTTTTTTTGTCTTTTGTCTTTTTGTCTGTTGTTGTTGTTGTTGTTGTTGCTATTTCTTGGGCCGCTCCCGCGGCATATGGAGGTTCCCAGGCTAGGGGTTGAATTGGAGCTGTAGCCACCGGCCTACGCCAGAGGCACAGCAACGCAGGATCCGAGCCGCGTCTGCAACCTACACCACAGCTCACGGCAACGCCAGATTGTTAACCCACTGAGCAAGGGCAGGGACCGAACCCGCAACCTCATGGTTCCTAGTCGGATTCGTTAACCACTGCGCCACGACGGGAACTCCAGTCTTC	T	28	WXP2,WXP4,WXP5,WXP6,XP1,XP2,XP3,XP4,XP6,XP7,LW5,LW6,LW7,LA7	-	-	intergenic_variant	MODIFIER	-	-	-	4	6	4	14
sv_00668	1	40416970	40419262	2292	DEL	AAGGAAAATGAGTCTTTTCATTTTGTCCAAATGTCATATTCTATTTCCTTTCGGAAGTTTTTTCAAGGAAATCTAGACTCTTTGCTCTTGCCTTCTTTGTAGCAATAAGTGTTAAAGTTAAAATGTTTCATACTTATTGGGGATTATCAATGTAAACAAGATTCAAGGACCAGAAATCATAGGCAGTAAACAATGAATTGATATGAACAAATATTTGAAAAGTATAATGTTTTGCATAATGCAAATTATTGCATCTAATATTAAATATCTTTTGTTATTTATTTGAATGTTATGATTTGTTTTTATTATTTTCATGTTTATAAGGCTTTACATTTAAGGAATGTGCTAGGGTTTTCAATTTTTCTAACATTTTATTAGATATTAAAATTGGTGTGGTTT…	A	6	XP1,XP3,XP6	-	-	intergenic_variant	MODIFIER	-	-	-	0	3	0	3
sv_00669	1	40572234	40572343	109	DUP:TANDEM	GTTTACCCAGACAACCCAAGATAATCTCCCCATGTAGAAGTCTTATTCACATCAGCAAAGTCACTTTTGCTATGGGAGATAGCACATTCAGAAGTTCCAGAGATTAGGAT	GTTTACCCAGACAACCCAAGATAATCTCCCCATGTAGAAGTCTTATTCACATCAGCAAAGTCACTTTTGCTATGGGAGATAGCACATTCAGAAGTTCCAGAGATTAGGATTTTACCCAGACAACCCAAGATAATCTCCCCATGTAGAAGTCTTATTCACATCAGCAAAGTCACTTTTGCTATGGGAGATAGCACATTCAGAAGTTCCAGAGATTAGGAT	16	XP3,LW6,LW7,LA6	-	-	intergenic_variant	MODIFIER	-	-	-	0	1	3	4
sv_00670	1	40639955	40640239	284	DEL	TGTGTTTGTTTATTCTTTTTTTTTTTTTTTTTTTGTCTTTTTGCTATTTCTTTGGGCCGCTCCTGCGGCATATGGAGGTTCCCAGGCTAGGGGTCGAATCGGAGCTGTAGCCACCAGCCTACACCAGAGCCACAGCAACGTGGGATCCGAGCCGCGTCTGCAACCTACACCACAGCTCACGGCAACGCCGGATCGTTAACCCACTGAGCAAGGGCAGGGACTGAACCCGCAACCTCATGGTTCCTAGTCGGATTCGTTAACCACTGCGCCACGACGGGAACTCCA	T	15	WXP3,WXP4,WXP5,XP2,XP3,XP5,LW7,LA6,LA7	ENSSSCG00000048922	ENSSSCT00000070547.1	non_coding_transcript_exon_variant,feature_truncation	MODIFIER	-	lncRNA	EXON=2/2,STRAND=1	3	3	3	9
sv_00671	1	40685913	40686223	310	DEL	GCCCCCACTCACCAAATCCTTATTTTTTTTTTTTTTTTTTTTTTTGTCTTTTGTCTTTTTGTTGTTGTTGTTGCTATTTCTTGGGCCGCTCCCGTGGCATATGGAGGTTCCCAGGCTAGGGGTCTAATCGGAGCTGTAGCCACCGGCCTATGCCAGAGCCACAGCAACGCGGGATCCGAGCCACGTCTGCGACCTACACCACAGCTCACGGCAGCGCCGGATCGTTAACCCACTGAGCAAGGGCAGGGACCGAACCCGCAACCTCATGGTTCCTAGTCGGATTCGTTAACCACTGCGCCACGACGGGAACT	G	17	WXP1,WXP2,WXP4,WXP5,WXP6,WXP7,XP1,XP3,XP4,XP6	ENSSSCG00000043582	ENSSSCT00000087242.1	intron_variant,non_coding_transcript_variant,feature_truncation	MODIFIER	-	lncRNA	INTRON=3/3,STRAND=1	6	4	0	10
sv_00672	1	40703879	40704177	298	DEL	TTCTATAGTTTCTTTTTTTTTTTTTTTATTATTATTTTCCACTGTACAGCAAGGGGGTCAGGTCATCCTTAGATGTATACATTGCAGTTACAGTTTTTTTCCCCCACCCTTTCTTCTGTTGCGACATGAGTATCTAGACATAGTTCTCAATGCTATTCAGCAGGATCTCCTTATAAATCTATTCTAGGTTGTGTCTGATAAGCCCAAGCTCCCGATCCCTCCCACTCCCTCCCCCTCCCATCAGGCAACCACAAGTCTCTTCTCCAAGTCCATGATTTTCTTTTCTGAGGAGATGTTCA	T	15	XP4,LW5,LW7,LA7	-	-	intergenic_variant	MODIFIER	-	-	-	0	1	3	4
sv_00673	1	40720713	40720898	185	DEL	GGATGTGCACCCCCTGTACCCACCCCCCGCCACCCCAGCCCTGCCAACCACTTCCTAAACTGGCCCACCCAGCACTTGGGTGCTCACGGTTGTGTTTCCATGTGCTTACATAGTACTGGATGAAAATATTAAAGGAAATAAAATTATCTAGTTAAAATACCTAAGAGTTTTCAACCTTTAACACCT	G	15	LW6,LW7,DU7	-	-	intergenic_variant	MODIFIER	-	-	-	0	0	3	3
sv_00674	1	40836140	40836545	405	DEL	TAAGAAACAATCTGGGAGTTCCCGTCGTGGCGCAGTGGTTAACGGGTCCGACTAGGAACCATGAGGTTGCGGGTTCGGTCCCTGCCCTTGCTCGGTGGGTTAACGATCCGGCGTTGCCGTGAGCTGTGGTGTAGGTTGCAGACGCAGCTCGGATCCTGCGTTGCTGTGCCTCTGACGTAGGCCGGTGGCTACAGCTCCAATTGGACCCCTAGCCTGGGAACCTCCATATGCCGTGGGAGCACGGCCCAAGAAATAGCAACAACAACAACAACAAAAGACAAAAAGACAAAAGACAAAAAAAGAAAAAAAAAAAAAAAAAGACTTAAACATAAGACCAGATACCCTCAAACTCCTACAAAATAACATAGGCAAAACATTCTCTGACATCATCCGTAAAAA…	T	5	XP3,LA4,LA5,DU7	-	-	intergenic_variant	MODIFIER	-	-	-	0	1	3	4
sv_00675	1	40899967	40906462	6495	DEL	TAGAAAAGCATGAGAAGCTGCAACAAGCCTGGCCGACTTGGGAAAAGATCTCAGACGGTCTTTCTGAGTCGGGCTGCCCTGGGGAGGAGCCTCTTGAGCCTCCAAGGGCCCTGCTACCCGCCCAAGACCCCAAGGGGTGCTGAGACCTAGTGGACCAGCTGCATAGGACTGCCAGCTCCAGGCAGGACCCCCTGCAGCCCAGAAAAGCTGCAACAAGACTGGCCGACTTGGGAAAAGATCTCAGACGGTCTTTCTGAGTCGGGCTGTCCTGGGGAGGAGCCTCTTGAGCCTCCAAGGGCCCTGCTACCCGCCCAAGACCCCAGGGGGTGCTGAGACCTAGTGGACCAGCTGCATAGGACTGCCAGCTCCAGGCAGGACCCCCTGCAGCCCAGAAAAGCT…	T	18	XP1,XP3,XP4,XP5,XP6,LW1,LW2,LW3,LW4,LW5,LA1,DU5	ENSSSCG00000050086	ENSSSCT00000090847.1	stop_lost,coding_sequence_variant,5_prime_UTR_variant,3_prime_UTR_variant,feature_truncation	HIGH	-	protein_coding	EXON=1/1,STRAND=1	0	5	7	12
sv_00676	1	40946520	40946826	306	DEL	GTCAGCTGTAGATTCTTTTTTTTTTTTTTTTTTTTTGTCTTTTGTCTTTCTTTTTGTTGTTGTTGTTGCTATTTCTTGGGCCGCTCTCGCGGCATATGGAGGTTCCCAGGCTAGGGGTTGAATCGGAGCTGTAGCCACCGGCCTACACCAGAGCCACAGCAATGCGGGATCCGAGCCGCGTCTGCAACCTACACCACAGCTCACGCAACGCCGGATCGTTAACCCACTGAGCAAGGGCAGGGACCGAACCCGCGACCTCATGGTTCCTAGTCGGATTCGTTAACCACTGCGCCACGACGGGAACTCC	G	13	LW6,LW7,LA6,LA7,DU7	ENSSSCG00000047837	ENSSSCT00000069786.1	non_coding_transcript_exon_variant,intron_variant,feature_truncation	MODIFIER	-	lncRNA	EXON=1/2,INTRON=1/1,STRAND=1	0	0	5	5
sv_00677	1	41022378	41022726	348	DEL	CTTCATTTCTCTCTGCCTATTCCTCTTCCTTTACCCCCCCCCCCAACCTTCTCCTGAGAACCTTCTTCCAACAAATCATTTAAACAGAAATCTCCATCTCTGACTCTTCTTCTAGGGAACCTTATCTAAGGCAATCATTGATGGTGCACTCAGAGCTGCCAAGACCACATGTCAACATTGGTGTCTATCCCAAACTTCTCAGAAAAGAATGGCACAGCACCTCAATCACAGATAATTCTTTCCCAGTTGTTTTGAATTCACCACTCATCTCATTTTAAACTTTTATTTAAACTCAGTATTATCAGTTTAAATCCTTGGGTGAAAGCAATATAAGGGTAAGGGCTCAGGA	C	13	WXP6,XP1,XP3,XP6,XP7,LA4,LA5	-	-	intergenic_variant	MODIFIER	-	-	-	1	4	2	7
sv_00678	1	41081767	41082070	303	DEL	TTCAATGCTTATTTTCTTTTCTTTTTTTTTTTTATTTTTTGTCTTTTTGTTGTTGTTGTTGTTGCTATTTCTTGGGCTGCTCCCGTGGCATATGGAGGTTCCCAGGCTAGGGGTTGAATCAGAGCTGTAGCCACCGGCCTACGCCAGAGCCACAGCAACGTGGGATCCGAGCCGTGTCTGCAACCTACACCACAGCTCACGGCAACGCCGGATCGTTAACCCACTGAGCAAGGGCAGGGACCGAACCCGCAATCTCATGGTTCCTAGTCGGATTCGTTAACCACTGCGCCACGACAGGAACTCC	T	8	WXP4,WXP7,XP5,XP6	ENSSSCG00000004242	ENSSSCT00000004689.4	intron_variant,feature_truncation	MODIFIER	TBC1D32	protein_coding	INTRON=3/33,STRAND=1	2	2	0	4
sv_00679	1	41186569	41186880	311	DEL	ACAAATAGCTGTTTTATTTATTTATTTATTTATTTTTTTTGGTCTTTTTGTCTTTTTTGTTGTTGTTGTTGCTATTTCTTTGGGCCGCTCCCGCGGCATATGGAGGTTCCCAGGCTAGGGGTCGAATCGGAGCTGTAGCCACCGGCCTACGCCAGAGCCACAGCAACGCGGGATCCGAGCCGCGTCTGCAACCTACACCACAGCTCACGGCAACGCCGGATCGTCAACCCACTGAGCAAGGGCAGGGACCGAACCCGCAACCTCATGGTTCCTAGTCGGATTCATTAACCACTGCGCCACGACGGGAACTCC	A	20	XP3,XP4,XP6,LW5,LW6,LW7,LA6,LA7	ENSSSCG00000004242	ENSSSCT00000004689.4	intron_variant,feature_truncation	MODIFIER	TBC1D32	protein_coding	INTRON=26/33,STRAND=1	0	3	5	8
sv_00680	1	41196392	41196594	202	DEL	ATTTGTATGCATGTGTGTGTATATAATCAGTTTTTATGCACAACAGAATGTACCCATTTTAAGAGTAGTTTGCATTTTGATAAATACTTAATGCCCCCATAATCACCACCACAATCAAAATTCTCATGACCCCGTAGAAGTTCTCTTTTGTCCCTTGCAGTCAGCTTCTCCCCACCTCCAGCAGCAGGCCAATCACTGATTTT	A	17	WXP4,WXP6,XP1,XP3,XP6,XP7,LW6,LW7,LA4,LA5,LA6	ENSSSCG00000004242	ENSSSCT00000004689.4	intron_variant,feature_truncation	MODIFIER	TBC1D32	protein_coding	INTRON=26/33,STRAND=1	2	4	5	11
sv_00681	1	41221896	41222071	175	DEL	TAAAAATAGGTTTAGTATGACACAACCTAGAATAGATTTACAAGGAGATCCTGCTGAATAGCATTGAGAACTATGTCTAGATACTCATGTCGCAACAGAAGAAAGGTGGGAAAAAACTGTAACTGCAATGTATAATTAAGGATAACCTGACCCCCTTGCTGTACAGTGGGAAAAAA	T	17	XP2,XP6,LW2,LW3,LW6,LW7,LA7,DU5	ENSSSCG00000004242	ENSSSCT00000004689.4	intron_variant,feature_truncation	MODIFIER	TBC1D32	protein_coding	INTRON=30/33,STRAND=1	0	2	6	8
sv_00682	1	41244483	41244768	285	DEL	TGACTCATGGAGTTCCCGTCATGGCGCAGTGGTTAACGAATCCACTAGGAACCATGAGGTTGCGGGTTCGGTCCCTGCCCTTGCTCAGTGGGTTAACGATCCGGCGTTGCCGTGAGCTGTGGTGTAGGTTGCAGGCGCGGCTCGGATCCCGCGTTGCTGTGGCTCTGGCATAGGCCAACGGCTACAGCTCCGATTAGACCCCTAGCCTGGGAACCTCCATATGCCGCGGGAGCGGCCCAAGAAATAGCTAAAAAGACAAAAAAAAAAAAAAAAAAAAAAAAAAAAA	T	14	WXP1,WXP3,WXP4,WXP7,XP3,XP4,XP6,LW4,LW5,LA6,LA7	ENSSSCG00000004242	ENSSSCT00000004689.4	intron_variant,feature_truncation	MODIFIER	TBC1D32	protein_coding	INTRON=32/33,STRAND=1	4	3	4	11
sv_00683	1	41303913	41304115	202	DEL	TTACAGTGCTTATTCTTTTTTTTTTTTTTTCCCACTGTACAGCAAGGGGGTCAGGTTATCCTTAGATGTATACATTGCAATTACAGTTTTTCCCCCACCCTTTCTTCTGTTGCAACATGAGTATCTAGACATAGTTCTCAATGCTATTCAGCAGGATCTCCTTGTAAATCTATTCTAGGTTGTGTCTGATAAGCCCAAGCTCA	T	15	WXP5,XP3,XP5,XP6,LW5,LW6,LW7,LA6,LA7,DU7	-	-	intergenic_variant	MODIFIER	-	-	-	1	3	6	10
sv_00684	1	41426219	41426296	77	DEL	TTAGATGTTTTTCTTTTTCTTTTTTTTTTTGTCTTTTGTCTTTTGTCTTTTTTGTTGTTGTTTTGTTGTTGTTGTTGC	T	8	XP3,XP5,XP6	-	-	intergenic_variant	MODIFIER	-	-	-	0	3	0	3
sv_00685	1	41527722	41530390	2668	DEL	ACTCACAAAATAATTACATGAAATAACTCAATGTAAAGGTAATTAATTATGAATTCTAATTAGTGGCCTAAAATATCAAACACAAAACACATCTTGAAGCACTGAGAAAAAAATTTATGAGGAAATGACAAATATAATGCAAAAGATAAGAAACATGGATTAGTGGATCCAGGAGATCAGTTATGAAAATAAAATAAAAACAAAACAAACATATGGAAATATCAAAATCCAGAAACGTAAAAATTCATTAAAACTGTATTGGTAAGAGTTTACATGCACAGAAGAGCAGTTCGCAAACTGGGATTCTTCTAACTAGCAGGGCAATGAAGCTCAGAGGGCTGTTTTAGGAAAATTTATTTATTTTTTACTTTTGTAAATTATTGTTTTATTTTTTCCATT…	A	4	XP3,XP6	-	-	intergenic_variant	MODIFIER	-	-	-	0	2	0	2
sv_00686	1	41659991	41661393	1402	DEL	TATTTTTCAACTTTTTTTTTTTTTTTTTTAATTTTCCCACTGTACAGCAAGGGGGTCAGGTCATCCTTAGATGTATACATTGCAGTTACAGTTTTTTCCCCCACCCTTTCTTCTGTTGCGACATGAGTATCTAGACATAGTTCTCAATGCTATTCAGCAGGATCTCCTTATAAATCTATTCTAGGTTGTGTCTGATAAGCCCAAGCTCCCGATCCCTCCCACTCCCTCCCCCTCCCATCAGGCAACCACAAATCTCTTCTCCAAGTCCATGATTTTCTTTTCTGAGGAGATGTTCATTTGTGCTGGATATTAGATTCCAGTTATAAGGGATATCATATGGTATTTGTCTTTGTCTTTCTGGCTCATTTCACTCAGTATGAGATTCTCTAGTTCCATCCA…	T	5	XP1,XP2,XP3,XP4,XP5,XP6,LW2,LW3,LW4,LW5,LA1,LA2	-	-	intergenic_variant	MODIFIER	-	-	-	0	6	6	12
sv_00687	1	41707865	41708031	166	DEL	ATCTTAATGAAAACTGACCTTCCTGTTGTAAGCCCCAAATCTTCCTCTTTCATGCTTCTCTTTATTCACAAGTCATATCCAGTATAACTAAAAACTTACTGGTTTTAGATTCAACATCTATACAGAATCTGATCAACTCTCAACAATTCTGTTATCTACATCATTAT	A	7	LA6,LA7,DU3,DU5,DU6	-	-	intergenic_variant	MODIFIER	-	-	-	0	0	5	5
sv_00688	1	41890011	41890149	138	DEL	TAAAATGCAATGATGTTCTATGTCTAGATACTTACATCACAACAGGACAATGGGAGGAAAAATTATGTATACATGTATGTGTAACCTGGTCCCCTTGCTGTACAGTGGAAAAAAATAAAAAATAAAAAAAGTAAAAAAA	T	11	WXP2,WXP3,WXP4,WXP5,WXP7,XP2,XP3,XP4,XP5,XP6,XP7,LW6,LW7,LA4,LA6,DU7	-	-	intergenic_variant	MODIFIER	-	-	-	5	6	5	16
sv_00689	1	41900037	41900343	306	DEL	ACACTCCTACATTGTTTTTTTTTTTTTTTTTTTTTTGTCTTTTTGTCTTTTGTTGTTGTTGTTGTTGCTATTTCTTGGGCCGCTCCCGCGGCATATGGAGGTTCCCAGGTTAGGGGTTGAATCGGAGCTGTAGCCACCGGCCTACGCCAGAGCCACAGCAACGCTGGATCCGAGCCGCATCTGCAACCTTCACCACAGCTCACGGCAACGCCAGATCATTAACCCACTGAGCAAGGGCAGGGACCGAACCCACAACCTCATGGTTCCTAGTCGGATTCATTAACCACTGCGCCACGACGGGAACTTC	A	19	WXP3,WXP5,WXP6,WXP7,XP1,XP2,XP3,XP6,LW6,LW7,LA4,LA5,LA7,DU7	ENSSSCG00000041950	ENSSSCT00000074160.1	coding_sequence_variant,intron_variant,feature_truncation	MODIFIER	-	protein_coding	EXON=2/2,INTRON=1/1,STRAND=-1	4	4	6	14
sv_00690	1	41955496	41955838	342	DEL	ATAATTTCCTTAATTTCTTTTTTTTAATTTTTTTATTTTATTTATTTATTTATTTATTTATTTATTTATTTATTTTTTATTTTTTGTCTTTTTGCTATTTCTTTGGGCCACTCCCGCGGCATATGGAGGTTCCCAGGCTAGGGGTTGAATCGGAGCTGTAGCCACTGGCCTACGCCAGAGCCACAGCAATGCGGGATCCGAGCCGCGTCTGCAACGTACACCACAGCTCACGGCAACGCCGGATCCTTAACCCACTGAGCAAGGGCAGGGACCGAACCCGCAACTTCATGGTTCCTAGTCGGATTCGTTAACCACTGCGCCACGACGGGAACTCCAATTTCCT	A	7	WXP7,XP3,LW5,DU7	-	-	intergenic_variant	MODIFIER	-	-	-	1	1	2	4
sv_00691	1	41988570	41988745	175	DEL	ACATTTAATTTTAATATCAAATCACCTGAGAGTTTTTGAGAGAAATTTTCATAAGCTGCTTAATTAGGTTTAACATTTTGTGATGTGATTATAAATAGACTGAACCAGAGATGGGGTAGAGATTATTTTCTGGGTTTCACATTACAGATGAAAGACCACAATAACCTTCTTGGCCT	A	15	XP3,XP4,XP6,XP7,LW6,LW7,LA6	-	-	intergenic_variant	MODIFIER	-	-	-	0	4	3	7
sv_00692	1	42221625	42221910	285	DEL	TTAAAAAAATCATCACGGAGTTCCCGTCGTGGCGCAGTGGTTGACGAATCCGACTAGGAACCATGAGGTTGCGGGTTCGGTCCCTGCCCTTGCTCAGTGGGTTGGGGATCCGGCATTGCCGTGAGCTGTGGTGTAGGTTGCAGACGCGGCTCGGATCCCGCGTTGCTGTGGCTCGGGCGTAGGCTGGCAGCTACAGCTCCGATTCGACCCCTAGTCTGGGAACCTCCATATGCCGTGGGAGTGGCCCAAGAAATAGCAAAAAAAAAAAATAATAAAATAAAAAAA	T	14	WXP4,XP3,XP5,XP6,XP7,LW3,LW5,LW6,LW7,LA7,DU4,DU5	-	-	intergenic_variant	MODIFIER	-	-	-	1	4	7	12
sv_00693	1	42222050	42223935	1885	DEL	TAAAAAATCTGTAACTTCGAAATACGATACCTTTTAAAATTGTACCTCACAAAATCAAATACCTCGGAATACACCTAACCAAAGAGGTAAAGGACCTATATGCCGAGAACTATAAAACCTTAATCAAAGAAATCAAAGAAGATGTAAAGAAATGGAAAGATATTCCATGTTCCTGGATTGGAAAAATCAATATTGTGAAAATGGCCATCCTACCCAAAGCAATCTACAGATTCAATGCAATCCCTATCAAATTACCCAGGACATTTTTCACAGAACTAGAACAAACAATCCAAACATTTTTATGGAACCACAAAAGACCCAGAATCGCCAAAGCAATCCTGAGAAACAAAAACCAAGCAGGAGGCATCACTCTCCCAGACTTCAAGAAATACTACAAAG…	T	18	XP1,XP5,XP6,LW4,LA2,DU5	-	-	intergenic_variant	MODIFIER	-	-	-	0	3	3	6
sv_00694	1	42240645	42240708	63	DUP:TANDEM	CCTGAAAGAAACACATTATATTCTGACACATCCAGCAACCTGTTCAATTTTATGTGATAAATTT	CCTGAAAGAAACACATTATATTCTGACACATCCAGCAACCTGTTCAATTTTATGTGATAAATTTCTGAAAGAAACACATTATATTCTGACACATCCAGCAACCTGTTCAATTTTATGTGATAAATTT	4	LW2,LW7	-	-	intergenic_variant	MODIFIER	-	-	-	0	0	2	2
sv_00695	1	42241058	42241143	85	DEL	CTTTTTTTTTTTTTTTTTAATTTTATTTTCCCACTGTACAGCAAGGGGGTCAGGTTATCCTTACATGTATACATTACAATTACAGT	C	12	WXP1,WXP2,WXP5,XP3,XP6,XP7,LW2,LW3,LW5,LW6,LW7,LA1,LA2,LA3,LA4,LA5,LA6,LA7,DU5	-	-	intergenic_variant	MODIFIER	-	-	-	3	3	13	19
sv_00696	1	42317097	42324953	7856	DEL	TTAAAAATTCAACTGGAGAGGAGAGGACAAGATGGCGGAGGAGTAGGGGGACACGCTCGCCCTCTCCCACAAACACAACAAAAAAAGCACATCTACAGAAGAAATGACTCGCACAGAACAACAACCAATCGCTGGCAGAGGAACCTAAACTCCAATAACGGCAAGAAGTTCGTGACATTATTGGGCAGAACGGGAGAAAAGAGGAGAGTGAGAGAAGGTGAATCCGAGCGGGACGGGCGCACCCGAAAGGGAACTGCGGAGGAGAAAGGGATCCCGCACCCTGGAAAGTCTCCTACCGGGGGAAAGATCAAACGAACCGGAGGAATCTCCAGATGCAGAGAAGAGTGTAGCAGTAAGTCGGAGTACGGAAAAACGATCAAGAACCCAACGGACCATCTG…	T	9	XP1,XP2,XP3,XP5,XP6,LW4,LW5	ENSSSCG00000050192	ENSSSCT00000080073.1	intron_variant,non_coding_transcript_variant,feature_truncation	MODIFIER	-	lncRNA	INTRON=2/2,STRAND=-1	0	5	2	7
sv_00697	1	42410456	42410784	328	DEL	TAGAAATGCAACAGGGAGTTCCCGTCGTGGCGCAGTGGTTAACGAATCCGACTAGGAACCATGAGGTTGCGGGTTCGGTCCCTGCCCTTGCTCAGTGGGTTAACGATCCGGTGTTGCCGTGAGCTGTGGTGTAGGTTGCAGACGCGGCTCGGATCCTGCGTTGCTGTGGCTCTGGCGTAGGCCGGTGGCTACAGCTCCGATTGGACCCCTAGCCTGGGAACCTCCATATGCCGCCGGAGCGGCCCAAGAAATAGCAACAACAACAACAAAAGACAAAAAAAAAAAAAAAAACAAAAAAAAAAAAAAAAAAAAAAAAAAAAAAAAAAAAA	T	15	WXP4,WXP7,XP1,XP3,XP4,XP5,XP6,XP7,LW5,LW6,LW7,LA4,LA5,LA6,LA7,DU7	ENSSSCG00000044184	ENSSSCT00000068820.1	intron_variant,non_coding_transcript_variant,feature_truncation	MODIFIER	-	lncRNA	INTRON=2/2,STRAND=-1	2	6	8	16
sv_00698	1	42588086	42588229	143	DEL	CTGATACTTGGTTGTTTTTTTTTTTTTTTTTTTTCTTGGGTCTGATATTTAATCTTTTTTTTTTTATTATTATTTTCCCACTGTACAGCAAGGGGGTCAGGTCATCCTTAGATGTATACATTGCAGTTACAGTTTTTTCCCCCA	C	12	LW5,LW6,LW7,DU3	-	-	intergenic_variant	MODIFIER	-	-	-	0	0	4	4
sv_00699	1	42617233	42617411	178	DEL	CAGAAAAAGCACATCTAAGGGTAACCTGACCCCCTTGCTGTACAGTGGGAAAAAAAAAAAAAAAAAAAAAACCTTTACCAATAAAAACATACATACTTATAATGTACCAAGTACAATACAAGCACTACAAAATCATAGAATAAAAAATATGCGAACCAAAAAAAAAAAAAGAAAAGAAA	C	33	XP3,XP6,LW6,LW7,LA6,LA7	-	-	intergenic_variant	MODIFIER	-	-	-	0	2	4	6
sv_00700	1	42745758	42745900	142	DEL	GATAAGTGAAAGTTTTGTTTTTTTTTTATTTTCCCACTGTACAGCAAGGGGGTCAGGTTATCCTTACATGTATACATTACAATTACATTTTTTCCCCCACCCTTTGTTCTGTTGCAACATGAGTATCTAGACATAGTTCTCAA	G	6	LA6,LA7,DU7	ENSSSCG00000004244	ENSSSCT00000004691.3	intron_variant,feature_truncation	MODIFIER	MAN1A1	protein_coding	INTRON=2/12,STRAND=1	0	0	3	3
sv_00701	1	42766132	42766202	70	DEL	AAAAAAGGACAAAAGTCAAAAAAAAAAAACAAAAAAAAAAACAAAAAAACAACAGTGACAAAAAACTATAG	A	6	WXP2,WXP7	ENSSSCG00000004244	ENSSSCT00000004691.3	intron_variant,feature_truncation	MODIFIER	MAN1A1	protein_coding	INTRON=2/12,STRAND=1	2	0	0	2
sv_00702	1	42934716	42935781	1065	DEL	ATATATAGAATAGATAAGCAACAGATTTTTTTTGTGTGCTTATATTAACTTACATTTATTCACGAGATTCCACAGTATTTCTTCCTAACTTTCATTGCAGTATATATTTATTTATTTTTTTTTTATTTTATTTTCCCACTGTACAGCAAGGGGGTCAGGTTATCCTTACATGTATACATTACAATTACAGTTTTTCCCCCACCATTTCTTCTGTTGCAACATGAGTATCTAGACATAGTTCTGAATGCTATTCAGCGGGATCTCCTTGTAAATCTATTCTAGGTTGTGTCTGATAAGCCCAAGCTCCCGATCCCTCCCACTCCCTCCCCCTCCCATCAGGCAACCACAAGTCTCTTCTCCAAGTCCATGATTTTCTCTTCTGAGGAGATGTTCATTTGT…	A	9	XP1,XP2,XP4,XP6,LW4	ENSSSCG00000046375	ENSSSCT00000067837.1	downstream_gene_variant	MODIFIER	-	lncRNA	DISTANCE=3490,STRAND=1	0	4	1	5
sv_00703	1	42964409	42964598	189	DEL	AACAGGATTTCTTTTTTTTTTGGTCTTTTTGCCATTTCTTTGGGCCGCTCCTGTAGCCACTGGCCTACGCCAGAGCCACAGCAACGCGGGATCCGAGCCGCATCTGCAACCTACACCACAGCTCACGGCAACGCCGGATCGTTAACCCACTGAGCAAGGGCAGGGACCGAACCCGCAACCTCATGGGAGG	A	9	LW4,LA6	-	-	intergenic_variant	MODIFIER	-	-	-	0	0	2	2
sv_00704	1	43066110	43066271	161	DEL	AAGGTTCTTTTTTTTTTTATTTTTTTTATTTTTTTTATTTTCCCACTGTACAGCAAGGGGGTCAGGTTATCCTTACATGTATACATTACAATTACAGTTTTTCCCCCACCCTTTCTTCTGTTGTAACATGAGTATCTAGACATAGTTCTCAATGCTATATAT	A	10	WXP2,WXP4,WXP5,XP2,XP3,XP4,XP5,XP6,LA4,LA7	ENSSSCG00000004245	ENSSSCT00000004692.4	intron_variant,feature_truncation	MODIFIER	FAM184A	protein_coding	INTRON=6/17,STRAND=1	3	5	2	10
sv_00705	1	43142745	43142846	101	DEL	TCATAAGCTTTACAGACAAGCAAAAGATAAAAGTGTAGAGAAATAACAAACCAGGTTTACAAGAATTAGTAAAGGAACATCTCTAAGTGAAGAAGAAGAAGA	T	5	XP3,XP6,XP7	-	-	intergenic_variant	MODIFIER	-	-	-	0	3	0	3
sv_00706	1	43164397	43164675	278	DEL	CAAAATTCACAATCCAGGAGTTCCCGTTGTGGCGCAGTGGTTAACGAATCCGACTAGGAACCATGAGGTTGCAGGTTCGGTCCCTGCCCTTGCTCAGTGGGTTAACGATCCAGCGTTGCTGTGAGCTGTGGTGTAGGTTGCAGACGCGGCTCAGATCCCGCGTTGCTGTGGCTCTGGCCTAGGCCGGTGGCTATGGCTCCGATTCGACCCCTAGCCTGGGAACCTCCATATGCCGCAGGGGTGGCCCAAGAAATAGCAAAAAAAAAAAAAAAAAAAAAA	C	12	XP2,XP3,XP6,LW6,DU7	-	-	intergenic_variant	MODIFIER	-	-	-	0	3	2	5
sv_00707	1	43479693	43479784	91	DUP:TANDEM	TCGAGTCCGAGGAGCTGTGGGGTCGACCAGCTGTCCCGACCGACTCGTCCCGGGTTTGAGCTGACGTGGGATCGACCAGTTATCCCGGCCAA	TCGAGTCCGAGGAGCTGTGGGGTCGACCAGCTGTCCCGACCGACTCGTCCCGGGTTTGAGCTGACGTGGGATCGACCAGTTATCCCGGCCAACACGTCCCGGGTCCGAGGAGCCGGGCGGTCCACCCACTGTCCCGGCCGCCTCGGAACCGAGTCCGAGGAGCTGTGGGGTCGACCAGCTGTCCCGACCGACTCGTCCCGGGTTTGAGCTGACGTGGGATCGACCAGTTATCCCGGCCAA	13	LW6,DU7	ENSSSCG00000004249	ENSSSCT00000004696.4	intron_variant	MODIFIER	CEP85L	protein_coding	INTRON=3/14,STRAND=1	0	0	2	2
sv_00708	1	43479695	43479695	56	INS	G	GCGAGTCCGAGGAGCTGGGCGGTCCACCAAATGGCCCGGCCGACTCGGACC	4	WXP4,XP7	ENSSSCG00000004249	ENSSSCT00000004696.4	intron_variant,feature_elongation	MODIFIER	CEP85L	protein_coding	INTRON=3/14,STRAND=1	1	1	0	2
sv_00709	1	43481764	43489820	8056	DEL	TAAAATTAAATCCTGGGATAGAGGACAAGATGGCGGAGGAGTAGGGGGACACGCTCGCCCTCTCCCACAAACACAACAAAAAAAGCACATCTACAGAAGAAATGACTCGCACAGAACAACAACCAATCGCTGGCAGAGGAACCTAAACTCCAATAACGGCAAGAAGTTCGTGACATTATTGGGCAGAACGGGAGAAAAGAGGAGAGTGAGAGAAGGTGAATCCGAGCGGGACGGGCGCTCCTGAAAGGGAACTGCGGAGGAGAAAGGGATCCCGCACCCTGGAAAGTCTCCTACCGGGGGAAAGATCAAACGAACCGGAGGAATCTCCAGATGCAGAGAAGAGTGTAGCAGTAAGTCGGAGTACGGAAAAAAGATCAAGAACCCAACGGACCATCTGAA…	T	21	XP1,XP2,XP3,XP6,DU5	ENSSSCG00000004249	ENSSSCT00000004696.4	intron_variant,feature_truncation	MODIFIER	CEP85L	protein_coding	INTRON=4/14,STRAND=1	0	4	1	5
sv_00710	1	43550137	43550218	81	DEL	TTTTGATTCAGTCAAATACACTTACAAAGGAATTTCAGTATCCAAATATATATATATATATATATATATATATATATATATA	T	13	WXP2,WXP5,XP2,XP7	ENSSSCG00000004249	ENSSSCT00000004696.4	intron_variant,feature_truncation	MODIFIER	CEP85L	protein_coding	INTRON=11/14,STRAND=1	2	2	0	4
sv_00711	1	43591273	43591538	265	DEL	TAGAAAGTCCTTTTTGAGTTGCGTGGCGCAGTGGTACGAATCGACTAGGACCATGAGGGGGGGGTCGCCTTGTCAGTGGGTAACGATCTGGGTGGTGAGGGGGTAGGGCGAGCGGCGGATGCGGCTGTGGCTGGGAGGCGGTGGCTACAGCTCCGATTCAACCCTAGCTGGACCCATATGCCGGGAGCGCCAAGAAATAGCAACAAACAAAAAAAAAACAAAAAAAAAAAAAAAAAAAAAAAAAAAAAAAAAAAAAAAAAAAAAAA	T	16	WXP2,WXP3,WXP4,WXP5,WXP6,WXP7,XP1,XP2,XP3,XP5,XP6,XP7,LW1,LW2,LW4,LW5,LW6,LW7,LA1,LA2,LA5,LA6,LA7,DU1,DU2,DU4,DU6	-	-	intergenic_variant	MODIFIER	-	-	-	6	6	15	27
sv_00712	1	43628128	43628185	57	DEL	CTTAACTTGCTGAGCCACAATAGGAGCTTCCCATCCCAACTCTTTTTCGAATGGGCTG	C	19	WXP1,WXP3,WXP4,WXP5,WXP6,XP1,XP2,XP3,XP4,XP6,LW4,LW5,LW6,LW7,LA4,LA5,LA6,LA7,DU7	ENSSSCG00000020423	ENSSSCT00000022018.2	downstream_gene_variant	MODIFIER	-	snRNA	DISTANCE=492,STRAND=-1	5	5	9	19
sv_00713	1	43639843	43640180	337	DEL	ACGGCATATGGAGATTCCCAGGCTAGGGGTTGAATCGGAGCTGTAGCCACCAGCCTACACCACACCCACAGCAATGCCAGATCTGAGCCATGTCTGTGACCTACACCACAGCTCACAGCAACGCCGGATCCTTAACCCACTGAGCAAGGCCAGGGATCGAACCTGCAACCTCATGGTTCCTACTCGGATTTGTTAACCACTGAGCCCCAACGGGAACTCATCAACAGAGGTTTTTCATGTTCAATGCCCTGTTTTACAAAATAGAAAGATCTTTATGTCTCTATTTTGCCATCCCTGCTTTTATTTTTTGCTTTTTTTTTTTTTTAGGACCCCACCCG	A	3	WXP6,WXP7	-	-	intergenic_variant	MODIFIER	-	-	-	2	0	0	2
sv_00714	1	43699529	43699822	293	DEL	AACAAATGGAACTTTTTTTTTTTTTTTTTTTTTTTGTTGTTGTTGTTGTTGTTGCTATTTCTTGGGCCGCTCCCGCGGCATATGGAGGTTCCCAGGCTAGGGGTCCAATCGGAGCTGTAGCCACTGGCCTACGCCAGAGCCACAGCAACTCAGGATCCGAGCCGCGTCTGCAACCTACACCACAGCTCACGGCAACGCCGGATCGTTAACCCACTGAGCAAGGGCAGGGACCGAACCCGCAACCTCATGGTTCCTAGTCGGATTCGTTAACCACTGCGCCATGACGGGAACTCC	A	27	WXP2,WXP3,WXP5,WXP6,WXP7,XP1,XP2,XP3,XP4,XP5,XP6,XP7,LW5,LW6,LW7,LA4,LA5,LA6,LA7,DU7	ENSSSCG00000004250	ENSSSCT00000004697.4	intron_variant,feature_truncation	MODIFIER	SLC35F1	protein_coding	INTRON=4/7,STRAND=-1	5	7	8	20
sv_00715	1	43710062	43710347	285	DEL	TGATTTGCATTTCTTTTTTTTTTTTTTTTGTCTTTTTTTTTTTTGCTATTTCTTGGGCCGCTCCTGCGGCATATGGAGGTTCCCAGGCTAGGGGTTGAATCAGAGCTATAGCCACCGGCCTACGCCAGAGCCACAGCAACGCGAGATCCGGGCCACATCTGCAACCTACACCACAGCTCACGGCAACGCTGGATCGTTAACCCACTGAGCAAGGGCAGGGATCGAACCTGCAACCTCATGGTTCCTAGTCGGATTCGTTAACCACTGCGCCACGACGGGAACTCCC	T	14	WXP4,WXP5,WXP6,WXP7,XP1,XP2,XP3,XP4,XP5,XP6,XP7,LW7,LA4,LA6,LA7,DU7	ENSSSCG00000004250	ENSSSCT00000004697.4	intron_variant,feature_truncation	MODIFIER	SLC35F1	protein_coding	INTRON=3/7,STRAND=-1	4	7	5	16
sv_00716	1	43777514	43777619	105	DEL	GGGTGTGTGTGTGTGTGTGTGTGTGTGTGTGTGTAAACTCCAGAAACAGCCAGGACATGTGGTGGTGGTGGTGATGTAGGGTGTGTGTGTGTGTGTGTGTGTGTGT	G	5	WXP7,XP6,LW6	ENSSSCG00000004250	ENSSSCT00000004697.4	intron_variant,feature_truncation	MODIFIER	SLC35F1	protein_coding	INTRON=2/7,STRAND=-1	1	1	1	3
sv_00717	1	43792653	43792754	101	DEL	ATTCTTTTTTTTTTATTTTTTTATTTATTTATTTTTTTATTTTCCCACTGTACAGCAAGGGTGTCAGGTTATCCTTACATGTATACATTACAATTACAGTTT	A	17	WXP1,WXP2,WXP3,WXP4,WXP5,WXP7,XP1,XP2,XP3,XP4,XP7,LW6,LW7,LA4,LA5,LA6,DU7	ENSSSCG00000004250	ENSSSCT00000004697.4	intron_variant,feature_truncation	MODIFIER	SLC35F1	protein_coding	INTRON=2/7,STRAND=-1	6	5	6	17
sv_00718	1	43841153	43841447	294	DEL	GCCTTAACCCTCCATTTTTTTTTTTTTTTTTTTTTTTTTTTTTTTTTGTCTTTTTGCCATTTCTTGGGCCGCTCCTGCGGCATATGGAGGTTCCCGGGCTAGAGGTCGAATCGGAGCTGTAGCTGCCAGCCTACGCCAGAGCCACAGCAACGCAGGATCCGAGCCGCGTCTGTGACCTACACCACAACTCACGGCAAACGCCGGAACCTTGACCCACTGAGCAAGGGCAGGGATCGAACCCGCAACCTCATGGTTCCTAGTCGGATTCGTTAACCACTGCGCCACGACGGGAACT	G	14	WXP5,XP1,XP3,XP4,XP6,LW4,LW6,LW7,LA4,LA5,LA6,LA7,DU6	ENSSSCG00000004250	ENSSSCT00000004697.4	upstream_gene_variant	MODIFIER	SLC35F1	protein_coding	DISTANCE=3760,STRAND=-1	1	4	8	13
sv_00719	1	44171256	44171358	102	DEL	TACAAGAGTCTAGCTTCAGGCTAAAGCCAAAAAAAAAAAAAAAAAAAAAAAAAAAAAAAAAGAAAAAAAGGCAAAAAAAAAAAAAAAAAAAAAAAAAAAAAAA	T	14	WXP1,WXP2,WXP3,WXP4,WXP5,WXP6,WXP7,XP1,XP2,XP3,XP4,XP5,XP6,XP7,LW4,LW7,LA5,LA6,DU1,DU3,DU6,DU7	ENSSSCG00000020885	ENSSSCT00000030561.3	intron_variant,feature_truncation	MODIFIER	NUS1	protein_coding	INTRON=1/4,STRAND=-1	7	7	8	22
sv_00720	1	44220011	44220325	314	DEL	TAAGAAATTTGAGGAGTTCCCGTCGTGGCGCAGTGGTTAACGAATCCGACTAGGAACCATGAGGTTGCGGGTTCGGTCCCTGCCCTTGCTCAGTGGGTTAACGATCCGGCGTTGCCGTGAGCTGTGGTGTAGGTTGCAGACGCGGCTCGGATCCTGCGTTGCTGTGCCTCTGGCGTAGGCCGGTGGCTACAGCTCCGATTCAACCCCTAGCCTGGGAACCTCCATATGCCGCGGGAGCGGCCCAAGAAATAGCAACAACAACAACAACAAAAAAGACAAAAGACAAAAAAAAAAAAAAAAAAAAAAAAAAAAAAA	T	18	WXP7,XP1,XP2,XP3,XP4,XP5,XP6,XP7,LW4,LW5,LW7,LA4,DU6,DU7	ENSSSCG00000004252	ENSSSCT00000004699.4	intron_variant,feature_truncation	MODIFIER	-	protein_coding	INTRON=2/2,STRAND=-1	1	7	6	14
sv_00721	1	44364994	44365337	343	DEL	GCAGTGGATATTTTTATTTTTATTTTTATTTTTTTATTTATTTTTTTTTTTATTTTTTGTCTTTTGTCTTTTTTTTTGTCTTTTTTGTTGTTGTTGTTGTTGTTGCTATTTCTTGGGCCGCTCCTGCGGCATATGGAGGTTCCCAGGCTAGGGGTTGAATCGGAGCTGTAGCCACCGGCCTACGCCAGAGCCACAGCAACGCGGGATCCGAGCCACGTCTGCAACGTACACCACAGCTCACGGCAACGCCGGATCGTTAACCCACTGAGCAAGGGCAGGGACTGAACCCACAACCTCATGGTTCCTAGTCGGATTCGTTAACCACTGCGCCACAACGGGAACTC	G	20	WXP3,WXP4,WXP5,WXP6,WXP7,XP1,XP2,XP3,XP4,XP6,XP7,LW4,LW5,LA4,DU7	ENSSSCG00000004254	ENSSSCT00000004702.4	intron_variant,feature_truncation	MODIFIER	DCBLD1	protein_coding	INTRON=1/14,STRAND=-1	5	6	4	15
sv_00722	1	44381711	44381809	98	DEL	TAAGAATACAGGTTTGGGGAAAAACTGTAATTGCAATGTATACATGTAAGGATAACCTGACCCCCTTGCTGTACAGTGGGAAAATTAAAAAAGAAAAAA	T	10	LW6,LW7,LA7,DU6	-	-	intergenic_variant	MODIFIER	-	-	-	0	0	4	4
sv_00723	1	44418252	44418559	307	DEL	ACTGGTTGAATTCTTTTTTTTTTTTTTTTTTTTAGTCTTTTTGTCTTTTGTTGTTGTTGTTGCTATCTCTTGGGCCGCTTCGGTGGCATATGGAGGTTCCCAGGCTAGGGGTCGAATCGGAGCTGTAGCCACCGGCCTACGCCAGAGCCACAGCAACGCGGGATCCGAGCCGCGTCTGCAACCTACACCACAGCTCACGGCAACGCTGGATCGTTAACCCACTGAGCAAGGGCAGGGACCGAACCCGCGACCTCAGGGTTCCTAGTCGGATTCGTTAACCACTGCGCCACGAGCCACGACGGGAACTC	A	11	WXP5,XP2,XP3,XP4,XP6,LA4,LA5,DU5,DU7	ENSSSCG00000026978	ENSSSCT00000041797.2	intron_variant,feature_truncation	MODIFIER	ROS1	protein_coding	INTRON=1/43,STRAND=1	1	4	4	9
sv_00724	1	44514751	44514813	62	DEL	AATATATATGTGTAATATATATGTGTATATATATGTATATGTGTGTATATATGTGTGTAATAT	A	10	WXP2,WXP7,XP2,DU6,DU7	ENSSSCG00000026978	ENSSSCT00000041797.2	intron_variant,feature_truncation	MODIFIER	ROS1	protein_coding	INTRON=39/43,STRAND=1	2	1	2	5
sv_00725	1	44518340	44518629	289	DEL	ACCGAGTTATAGATTTTTTTTTTTTTTGTCTTTTTGTTGTTGTTGTTGTTGCTATTTCTTGGGACGCTCCCGCGGCATATGGAGGTTCCCAGGCTAGGGGTCGAATCGGAGCTGTAGCCACAGGCCTACGTCAGAGCCACAGCAACTCAGGATCCGAGCCGCGTCTGCAACCTACACCACAGCTCATGGCAACGCCGGATCGTCAACCCACTGAGCAAGGGCAGGGACCGAACCCGCAACCCCATGGTTCCCAGTCGGATTCGTTAACCACTGCGCCACGACGGGAACTC	A	12	XP4,LA4,LA5	ENSSSCG00000026978	ENSSSCT00000041797.2	intron_variant,feature_truncation	MODIFIER	ROS1	protein_coding	INTRON=42/43,STRAND=1	0	1	2	3
sv_00726	1	44534350	44534404	54	DEL	GTGGCTATTCGGCCACATCTGTTATTCCACTGAACTAGGCAGAATATTTTCCCTC	G	8	WXP4,WXP5	ENSSSCG00000026978	ENSSSCT00000041797.2	3_prime_UTR_variant,feature_truncation	MODIFIER	ROS1	protein_coding	EXON=44/44,STRAND=1	2	0	0	2
sv_00727	1	44596406	44596560	154	DUP:TANDEM	CATCCACGGCATATGGAGGTTCCCAGGCTAGGAGTCTAATCAGAGCTGTAGCCGCTGGCCTATGCCACAGCCAATGCCAGATCTGAGTCATGTCTGCAACCTACACCACAGCTCATGGCAACCCCAGATCCTTAACCCACTGAGTGTGGCCAGGG	CATCCACGGCATATGGAGGTTCCCAGGCTAGGAGTCTAATCAGAGCTGTAGCCGCTGGCCTATGCCACAGCCAATGCCAGATCTGAGTCATGTCTGCAACCTACACCACAGCTCATGGCAACCCCAGATCCTTAACCCACTGAGTGTGGCCAGGGATCCACGGCATATGGAGGTTCCCAGGCTAGGAGTCTAATCAGAGCTGTAGCCGCTGGCCTATGCCACAGCCAATGCCAGATCTGAGTCATGTCTGCAACCTACACCACAGCTCATGGCAACCCCAGATCCTTAACCCACTGAGTGTGGCCAGGG	7	WXP6,XP7	ENSSSCG00000048099	ENSSSCT00000069422.1	intron_variant,non_coding_transcript_variant	MODIFIER	-	lncRNA	INTRON=2/3,STRAND=1	1	1	0	2
sv_00728	1	44631538	44631814	276	DEL	TTCTAGTTTTATTTTTTTATTTTTTTATTTTTTAATTTTTTTATTTTTTTGTCTTTTGTTGTTGTTGTTGTTGTTGCTATTTCTTGGCGCTCCACGGCATATGAGGTTCCAGCTAGGGTTGAATCGGAGCTGTAGCATGGCCTACGCCAGAGCACAGCACGCGGATCCGAGCCGTCTGCACCTACCCAGCTCCGCACGCCGGATCGTACCACTGAGCGGCAGGCGACCCGCACCTCATGGTTCTAGTCGATTCGTTAACCACTGCGCCACGACGGGA	T	17	LA7,DU4,DU5,DU6	ENSSSCG00000048099	ENSSSCT00000069422.1	intron_variant,non_coding_transcript_variant,feature_truncation	MODIFIER	-	lncRNA	INTRON=3/3,STRAND=1	0	0	4	4
sv_00729	1	44836434	44836502	68	DEL	GAACCTCCATATGCCACGGGAGCGGCCTTAGAAAAGGCAAAAAGACAAAAAATAATAATAATAATAATA	G	11	LW5,LA4,LA5	ENSSSCG00000019126	ENSSSCT00000020721.2	upstream_gene_variant	MODIFIER	U6	snRNA	DISTANCE=434,STRAND=1	0	0	3	3
sv_00730	1	44844114	44844399	285	DEL	GAAAAACTGGAGGCAGGGAGTTCCCGTCGTGGCGCAGTGGTTAACGAATCCGACTAGGAACCATGAGGTTGCGGGTTCGGTCCCTGCCCTTGCTCAGTGGGTTAACGATCCGGCGTTGCCGTGAGCTGTGGTGTAGGTTGCAGATGCGGCTCGGATCCCGCGTTGCTGTGGCTCTGGCGTAGGCCGGTGGCTACAGCTCTGATTCGACCCCTAGCCTGGGAACCTCCATATGCCGCAGGAGCGGCCCAAGAAATAGCAACAACAACAACAACAACAACAACAACAA	G	6	WXP5,XP2,XP6	-	-	intergenic_variant	MODIFIER	-	-	-	1	2	0	3
sv_00731	1	44962745	44963069	324	DEL	TAAAAGTTGGTTCATGGAGTTCCCGTCGTGGCGCAGTGGTTAACGAATCCGACTAGGAACCATGAGGTTGCGGGTTCGGTCCCTGCCCTTGCTCAGTGGGTTAACGATCCGGCGTTGCCGTGAGCTGTGGTGTAGGTTGCAGACGCGGCTCGGATCCCGCGTTGCTGTGGCTCTGGCGTAGGCCAGTGGCTACAGCTCCGATTCAACCCCTAGCCTGGGAACCTCCATATGCCGCGGGAGCGGCCCAAGAAATAACAACAACAACAACAACAACAAAAAAAAAAGACAAAAAGACAAAAGACAAAAAAAAAAAAAAAAAAAAAAA	T	18	WXP3,WXP4,WXP5,WXP6,WXP7,XP1,XP2,XP3,XP4,XP5,XP6,LW5,LW6,LW7,LA4,LA5,LA7,DU7	ENSSSCG00000023834	ENSSSCT00000024566.3	downstream_gene_variant	MODIFIER	RSPH4A	protein_coding	DISTANCE=810,STRAND=-1	5	6	7	18
sv_00732	1	44969866	44969924	58	DEL	TACATATGTACATACTTATGTATGCCTATATATATGTGTGTGTATATATATTTGTATAC	T	17	WXP4,WXP6,WXP7,XP5,XP6	ENSSSCG00000023834	ENSSSCT00000024566.3	intron_variant,feature_truncation	MODIFIER	RSPH4A	protein_coding	INTRON=4/5,STRAND=-1	3	2	0	5
sv_00733	1	45067478	45067795	317	DEL	CAAGACTAAGAGTGTCAGGAGTTCCCGTCGTGGCGCAGTGGTTAATGAATCCTACTAGGAACCATGAGGTTGCTGGTTTGGTCCCTGCCCTTGCTCAGTGGGTTAACGATCTGGCGTTGCCGTGAGCTGTGGTGTAGGTTGCAGATGCGGCTCGGATCCCGAGTTGCTGTGGCTCTGGCGTAGGCCGGTGGCTGCAGCTCCGATTCAACCCCTAGCCTGGGAACCTCCATATGCCGCGGGAGTGGCCCAAGAAATAGCAACAATAACAACAACAACAACAACAAAAAAGACAAAAGACAAAAAAAAAAAAAAAAAAAA	C	6	WXP2,XP3,LW5,LA6	ENSSSCG00000046094	ENSSSCT00000071575.1	intron_variant,non_coding_transcript_variant,feature_truncation	MODIFIER	-	lncRNA	INTRON=2/3,STRAND=-1	1	1	2	4
sv_00734	1	45068644	45068933	289	DEL	TAAAAATTGCATTTACAGGAGTTCCCGTCGTGGCGCAGTGGTTAACGAATCCGACTAGGAACCATGAGGTTGCGGGTTCGGTCCCTGCCCTTGCTCAGTGGGTTAAGGATCCGGCGTTGCCGTGAGCTGTGGTGTAGGTTGCAGACACGGCTTGGATCCCGCGTTGCTGTGGCTCTGGCGTAGGCCGGTGGCTACAGCTCCGATTGGACCCCTAGCCTGGGAACCTCCATATGCCGCGGGAGCGGCCCAAGAAATAGCAACAACAAAAAGACAAAAGACAAAAAAAAAAA	T	12	WXP4,WXP6,XP5,XP6,LW5,LW6,LW7,LA6	ENSSSCG00000046094	ENSSSCT00000071575.1	intron_variant,non_coding_transcript_variant,feature_truncation	MODIFIER	-	lncRNA	INTRON=2/3,STRAND=-1	2	2	4	8
sv_00735	1	45135287	45135609	322	DEL	ATGATTTAGATTTTTTTTTTTTTTTTTTTTTGTCTTTTGTCTTTTGTTGTTGTTGTTGTTGTTGTTGTTGTTGTTGTTGCTGCTACTTCTTGGGCCGCTCCCGCGGCATATGGAGGTTCCCAGGCTAGGGGTTGAATCGGAGCTGTAGCCACCGGCCTATGCCAGAGCCACAGCAAACGCAGGATCCGAGCCGCGTCTGCAACCTTCACCACAGCTCACGGCAACGCCGGATCGTTAACCCACTGAGCAAGGGCAGGGACCGAACCCGCAACCTCATGGTTCCTAGTCGGATTCGTTAACCACTGCGCCACGACGGGAACTCC	A	12	XP3,LW4	-	-	intergenic_variant	MODIFIER	-	-	-	0	1	1	2
sv_00736	1	45141102	45141382	280	DEL	TAAAGAACACAATAATAGGAGTTCCCGTCGTGGCGCAGTGGTTAACGAATCCGACTAGAAACCATGAGGTTGCGGGTTCGGTCCCTGCCCTTGCTCAGTGGGTTAACCATCCGGCGTTGCCGTGAGCTGTGGTGTAGGTTGCAGACGCGGCTCGGATCCCGCGTTGCTGTGGCTCTGGCGTAGGCTGGTGGCTACAGCTCCGATTGGACCCCTAGCCTGGGAACCTCCATATGCCGCGGGAGCGGCCCAAGAAATAGCAAAAAGACAAAAAAAAAAAAAAA	T	16	WXP3,WXP4,WXP5,WXP6,WXP7,XP1,XP2,XP3,XP4,XP5,XP6,XP7,LW5,LW6,LA7,DU6	ENSSSCG00000051636	ENSSSCT00000088532.1	downstream_gene_variant	MODIFIER	-	lncRNA	DISTANCE=1793,STRAND=-1	5	7	4	16
sv_00737	1	45200352	45200423	71	DEL	GTTAACGAATCCGACTAGGAACCATGAGGTTGCGGGTTCGATCCCTGCCCTTGCTCAGTGGGTTAACGATCC	G	18	WXP2,WXP4,WXP5,WXP6,WXP7,XP1,XP2,XP3,XP4,XP5,XP7	-	-	intergenic_variant	MODIFIER	-	-	-	5	6	0	11
sv_00738	1	45310797	45311089	292	DEL	TAAAACTGTAAGATGAGGAGTTCCCGTCGTGGCGCAGTGGTTAATGAATCTGACTAGGAACCATGAGGTTGTGGGTTCGATCCCTGCCCTTGCTCAGTGGGTTAACGATCCGGCGTTGCTGTGAGCTGTGGTGTAGGTCACAGATGCGGCTCGGATCCCGCGTTGCTGTGGCTCTGGCATAGGCTGGTGTCACAGCTCCGATCAGACCCCTAGCCTGGGAACCTCCATATGCCGCAGGAGCGGCCCAACAAATGGCAAAAGACAAAAAACAAAAAACAAAAAACAAAAAACAA	T	19	WXP1,WXP2,WXP4,WXP5,WXP6,WXP7,XP1,XP2,XP3,XP4,XP5,XP6,LW5,LW6,LW7,LA6,LA7,DU6,DU7	-	-	intergenic_variant	MODIFIER	-	-	-	6	6	7	19
sv_00739	1	45337930	45338254	324	DEL	CTAAAAATAAAGCAGGGAGTTCCCGTCGTGGCGCAGTGGTTAACGAATACGACTAGGAACCATGAGGTTGCGGGTTCGGTCTCTGCCCTTGCTCAGTGGGTTAACGATCCGGCGTTGCCGTGAGCTGTGGTGTAGGTTGCAGACGTGGCTCAGATCCCGCATTGCTGTGGCTCTGGCGTAGGCCGGTGGCTACAGCTCCGATTGGACCCCTAGCCTGGGAACCTCCATATGCCGCGGGAGCGGCCCAAGAAATAGCAACAACAACAACACAACAACAACAAAAAAAGACAAAAGACAAAAATAAATAAATAAATAAATAAATAAA	C	19	WXP3,WXP5,WXP6,WXP7,XP2,XP3,XP4,XP5,XP6,XP7,LW6,LW7,LA6,LA7,DU7	-	-	intergenic_variant	MODIFIER	-	-	-	4	6	5	15
sv_00740	1	45358714	45358983	269	DEL	CAATATTTTCTTATGGGAGGGGGAGGGAGTGGGAGGGATCGGGAACTTGGGCCTATCAGACACAACTTAGAATAGATGTACAAGGAGATTCTGCTGAATAGTATTGAGAACTTTGTCTAGATACTCATGTTGCAACAGAAGAAAGGGTGGGGGAAAAAATGTAATTGTAATGTATACAAGTAAGGATAACTTGATCCCCTTGCTGTACAGTGGGAAAATAAATAAATAAATAAATAAAGAAGAAAAGAAAAGAGAAAAAAGAAAAAAAAA	C	19	WXP2,WXP5,WXP6,WXP7,XP1,XP2,XP3,XP4,XP6,XP7,LW4	-	-	intergenic_variant	MODIFIER	-	-	-	4	6	1	11
sv_00741	1	45435394	45435691	297	DEL	ACCACTTTGAGAATTTTTTTTTTTTTTTGTCTTTTTGTCGTTTGTTGTTGTTGTTGTTGCTATTTCTTGGGCCGCTCCCGCGACATATGGAGGTTCCCAGGCTAGGGGTTGAATCGGAGCTGTAGCCACCGGCCTACGCCAGAGCCACAGCAACGCGGGATCCGAGCCGCGTCTGCAACCTACACCACAGCTCACGGCAACGCCGGATCGTTAACCCACTGAGCAAGGGCAGGGACCGAACCCGCAACCTCATGGTTCCTAGTCGGATTCGTTAACCACTGCGCCACGACGGGAACTC	A	16	WXP3,WXP5,WXP7,XP1,XP2,XP7,LW5,LW6,LW7,DU6	-	-	intergenic_variant	MODIFIER	-	-	-	3	3	4	10
sv_00742	1	45583273	45583660	387	DEL	TTTCATTAGATTCTTTTTTTTTTTTTTTTTGTCTTTTGTCTTTTTGTTGTTGTTGTTGTTGTTGTTGCTATTTCTTGGGCCGCCTCCGCGGCATATGGAGGTTCCCAGGCTAGGGGTTGAATCGGAGCTGTAGCCACCGGCCTACGCCAGAGGCACAGCAACGCAGGATCCGAGCCGCGTCTGCAACCTACACCACATCTCATGGCAACGCTGGATTGTTAACCCACTGAGCAAGGGCAGGGACCGAACCCGCAACCTCATGGTTCCTAGTCGGATTCGTTAACCACTGCGCCACGACGGGAACTCCCTTTTTTTTTTTTTTTTTTTTTTTTTTTTGTCTTTTGTCTTTTTGTCTTTTTGTTGTTGTTGTTGTTGTTGTTGCTATTTC	T	5	WXP4,XP1	-	-	intergenic_variant	MODIFIER	-	-	-	1	1	0	2
sv_00743	1	45602420	45602479	59	DEL	TAGAAATCTGCCTACCACAGTGGTGTACAGAGTCCTTCCCTTTTATGGATTAGGGGATTA	T	13	WXP1,WXP2,WXP5,WXP6,XP2,XP6,DU6	-	-	intergenic_variant	MODIFIER	-	-	-	4	2	1	7
sv_00744	1	45645924	45646033	109	DEL	ATAAAATTTTTTTTTTTTTTTTTTTTTTTTTTAGAAGATTTTTTTATAAGCAAGATGAATGGGGGGGGGGGGGGGGGGGGGGGGGGGGGGGGGGGGGGGGGGGGGGGTGG	A	12	WXP1,WXP2,WXP3,WXP4,WXP5,WXP6,WXP7,XP1,XP2,XP4,XP5,XP6,XP7,LW4,LW5,LW7,LA5,LA6,DU1,DU4,DU5,DU6	-	-	intergenic_variant	MODIFIER	-	-	-	7	6	9	22
sv_00745	1	45779656	45779933	277	DEL	TAAAGAGGAGTTCCCGTCGTGGCGCAGTGGTTAACGAATCCGACTAGGAACCATAAGGTTGCGGGTTCGGTCCCTGCCCTTGCTCCGTGGCTTAACGATCCGGCGTTGCCGTGAGCTGTGGTGTAGGTTGCAGACACGGCTCGGATCCCGCGTTGCTGTGGCTCTGGCGTAGGCCGGTGGCTACAGCTCCGATTAGACCCCTAGCCTGGGAACCTCCATATGCCGCGGGAGCGGCCCAAGAAATAGCAACAACAACAACAAAAAAAAAAAAAAAAAAA	T	17	WXP4,WXP6,XP3,XP6	-	-	intergenic_variant	MODIFIER	-	-	-	2	2	0	4
sv_00746	1	46068449	46070500	2051	DEL	TGGAGGAATGCACAAAACACACACACACACACACACACACAGCATCTATCAAGACCTCAGTTCACCATGTGTGCAAGGAGACACACTTAAACATATCTTCAGTCACTACTGGCCACCTGATTTCAAATAATCTTCCTGCAATGCTTCATGATGAGCTGACTCTTCCAGTATCCACTTCTAGAAACAAACCTTTGGCTTTTTTCAAGGTAAAGATCAAATTTAATGTAATTTTGTTCATTTTATTGAGTAATGTGTCTATCACTATATTACCAATCATCAGTTTCTTATCATTTTAATATATCCCAGTGCCATGTTGTTGAATTATGTGCCCTGTATCACATCTTTCATATAAGGCCTGTGGTTCTTGTTGTGTGATTTTGACTAGTGGGGGACTTTTTA…	T	15	XP6,LW4	ENSSSCG00000049526	ENSSSCT00000070771.1	downstream_gene_variant	MODIFIER	-	protein_coding	DISTANCE=168,STRAND=-1	0	1	1	2
sv_00747	1	46172053	46172112	59	DEL	CCCTACCCGACCTCCACATGCTGTGGGTGCGGCCCAAAAAAAAAAAAAAAATACTGTATT	C	22	XP7,LW4,LW5,LW6,LW7,LA6	-	-	intergenic_variant	MODIFIER	-	-	-	0	1	5	6
sv_00748	1	46368417	46368743	326	DEL	ACCTGCATCTTCAGGAGTTCCCGTCGTGGTGCAGTGGTTAACGAATCCGACTAGGAACCATGAGGTTGCGGGTTCGATCCCTGCCCTTGCTCAGTGGGTTAACGATCCGGCGTTGCCGTGAGCTGTGGTGTAGGTTGCAGACACGGCTCGGATCCCGCGTTGCTGTGGCTCTGGCGTAGGCCGGTGGCTACAGCTCCGATTCAACCCCTAGCCTGGGAACCTCCATATGCCGCGGGAGCGGCCCAAGAAATAGCAACAATAACAACAACAACAACAACAAAAAGAAAAGACAAAAGACAAAAAAAAAAAAAAAAAAAAAAAAAAAAC	A	12	WXP3,WXP4,WXP5,WXP6,XP1,XP2,XP3,XP4,XP6,XP7,LW4,DU6,DU7	-	-	intergenic_variant	MODIFIER	-	-	-	4	6	3	13
sv_00749	1	46446317	46446438	121	DUP:TANDEM	TGTTAATTATATTTATTGTGTCATATACTACATTGCTAGTACTTATCTTTTAACTAGAAGTTTGTACCTTTTGATTACCTACATCCAATCCCCCTCCCCACATCTCTTTTTCTGAGTTTCTT	TGTTAATTATATTTATTGTGTCATATACTACATTGCTAGTACTTATCTTTTAACTAGAAGTTTGTACCTTTTGATTACCTACATCCAATCCCCCTCCCCACATCTCTTTTTCTGAGTTTCTTGTTAATTATATTTATTGTGTCATATACTACATTGCTAGTACTTATCTTTTAACTAGAAGTTTGTACCTTTTGATTACCTACATCCAATCCCCCTCCCCACATCTCTTTTTCTGAGTTTCTT	3	WXP6,XP2,LW4,LW5,DU6	-	-	intergenic_variant	MODIFIER	-	-	-	1	1	3	5
sv_00750	1	46455794	46456081	287	DEL	TAAGACTAGTGTCTAGGAGTTCCCGTCGTGGTGCAGTGGTTAACGAATCCGACTAGGAACCATGAGGTTGCGGGTTCGGTCCCTGCCCTTGCTCAGTGGGTTAACGATCCGGCGTTGCCGTGGCTGTGGTGTAGGTTGCAGACGCGGCTCGGATCCTGCGTTGCTGAGGCTCTGGCATGGGCCGGAGGCTACAGCTCCGATTCGACCCCTAGCCTGGGAACCTCCATATGCCGCGGGAGTGGCCCAAGAAATAGCAAAAAAGACCAAAAAAAAAAAAAAAAAAAAAAA	T	3	XP1,XP3,XP6	-	-	intergenic_variant	MODIFIER	-	-	-	0	3	0	3
sv_00751	1	46494026	46494333	307	DEL	TTAAAATTGACAAGCAGGAGTTCCCATCGTGGCGCAGTGGTTAATGAATCCGACTAGGAACCATGAGGTTGCGGGTTTGGTCCCTGCTCTTGCTCAGGGGGTTAACGATCCGGCGTTGCCATGAGCTGTGGTGTAGGTTGCAGACGCGGCTCGGATCCCGCGTTGCTGTGGCTCTGGCGTAGGCCGGTGGCTACAGCTCCGATTCAACCCCTAGCCTGGGAACCTCCATATGCTGCGGGAGCGGCCCAAGAAATAGCAACAACAACAAAAGACAAAAGACAAAAAAAAAAAAAATAATAAAAATAAAA	T	11	WXP3,WXP6,WXP7,XP1,XP2,XP3,XP4,XP5,XP6,XP7,LW4,LA4,LA5,DU7	-	-	intergenic_variant	MODIFIER	-	-	-	3	7	4	14
sv_00752	1	46526110	46526419	309	DEL	TCTTAAAGGTTTTGTTTTTTTTTTTTTTTTTTTTTTTTTTTTTTTTTTTTTTTTTTTTGTCTGTTGTTTTGTTGTTGCTGTTGTTGCTATTTTCGGCGCTCCCGCATATGGAGGTTCCAGGCTAGGGTTGAATCGGAGCTGTAGCACCAGCCTACGCCAGAGCCACAGCAACGCAGGATCCGAGCCGCGTCTGCGACCTACACCACAGCTCACGGCACGCCGGATCGTTAACCCACTGAGCAAGGCAGGACCGAACCCGCAACCTCATGGTTCTAGTCGATTCGTTAACCACTGCGCCACGACGGAACTC	T	27	WXP5,WXP6,WXP7,XP1,XP2,XP3,XP4,XP5,XP6,XP7,LW4,LW5,LW6,LW7,LA6,LA7,DU1,DU5,DU7	-	-	intergenic_variant	MODIFIER	-	-	-	3	7	9	19
sv_00753	1	46753692	46753998	306	DEL	ACAGAGTTAGCATTTCTTTTTTTTTTTTTTTGTCTTTTGTCTTTTTGTTGTTGTTGTTGTTGTTCTTGCTATTTCTTGGGCTGCTCCCGCGGCATATGGAGGTTCCCAGGCTAGGGGTTGAATCAGAGCTGTAGCCACTGGCCTATGCCAGAGCCACAGCAACGCGGGATCCGAGCAGCGTCTGCAACCTACACCACAGCTCACGGCAACGCCGGATCGTTAACCCACTGAGCAAGGGCAGGGACAGAACCCGCAACCTCATGGTTCCTAGTCGGATTCGTTAACCACTGCGCCACGACGGGAACTG	A	12	WXP1,WXP5,XP2,XP3,XP6,XP7,LW5,LW6,LW7,LA6,LA7	-	-	intergenic_variant	MODIFIER	-	-	-	2	4	5	11
sv_00754	1	46839756	46839756	51	INS	G	GTAGCTGCCGGCCTACACCACAGCAACACTGGATCTGAGCCTCATCTACAAC	13	WXP4,WXP5,XP6,XP7,DU5	-	-	intergenic_variant	MODIFIER	-	-	-	2	2	1	5
sv_00755	1	46860097	46860160	63	DUP:TANDEM	AACAGTTTAAGAATGATTAGTATGGCAGAAACATAGATCAATGGAAAGGATAGAAAGCCCAGAA	AACAGTTTAAGAATGATTAGTATGGCAGAAACATAGATCAATGGAAAGGATAGAAAGCCCAGAATACACATCGCCACACAGTTTAAGAATGATTAGTATGGCAGAAACATAGATCAATGGAAAGGATAGAAAGCCCAGAA	5	LW4,DU6	-	-	intergenic_variant	MODIFIER	-	-	-	0	0	2	2
sv_00756	1	46911585	46913646	2061	DUP:TANDEM	TCTGCATGCCATGCTGTGTCTGCTCTGTCCTCCTCTAGGCTGAGAGCAGATGTGATTAATAAACTGCTATCATCTGCTTAGCACTGGCCATCCCTGTCCTAGATCAGGAATCCCTCCCTCAGCAAGATGCTATTAAAACATACAGTGAGCAGCTTTGAGAATGTGTCGTAGAGAATGTGCCTGTTTGTGGAGCAAAGGGCTGGTTGGTTTACTCTCTATTGTAATGAATGACTCTCTTTCCAAAGCAAAGTTCAGAAAGCTCACTATAAAAGTCTAGATTCCCTAAATTCATGGCTCTTTGGCTGTGTTACACATCCACTGCCTGTGTTGCACACATCTTTCTCTACCAAGTCTCTTGGTGCTTGAGAGGCCAGGTAAGACAATATGAATTAAGTTAAT…	TCTGCATGCCATGCTGTGTCTGCTCTGTCCTCCTCTAGGCTGAGAGCAGATGTGATTAATAAACTGCTATCATCTGCTTAGCACTGGCCATCCCTGTCCTAGATCAGGAATCCCTCCCTCAGCAAGATGCTATTAAAACATACAGTGAGCAGCTTTGAGAATGTGTCGTAGAGAATGTGCCTGTTTGTGGAGCAAAGGGCTGGTTGGTTTACTCTCTATTGTAATGAATGACTCTCTTTCCAAAGCAAAGTTCAGAAAGCTCACTATAAAAGTCTAGATTCCCTAAATTCATGGCTCTTTGGCTGTGTTACACATCCACTGCCTGTGTTGCACACATCTTTCTCTACCAAGTCTCTTGGTGCTTGAGAGGCCAGGTAAGACAATATGAATTAAGTTAAT…	6	XP1,XP5,LW4	-	-	intergenic_variant	MODIFIER	-	-	-	0	2	1	3
sv_00757	1	47016346	47016657	311	DEL	ACCAATCTGTTTTCTTTTTTTTTTTTTTTTTTGTCTTTTTTGTCTTTTTGTCTTTTGTTGTTGTTGTTGTTGCTATTTCCTGGGCCGCTCCAGCGGCATATGGAGGTTCCCAGGCTAGGGGTTGAATCGGAGCTGTAGCCACCGGCCTACGCCAGAGCCACTGCAATGCAGGATCCGAGCCGCGTCTGCAACCTACACCACAGCTCACGGCAACGCCGGATCGTTAACCCACGGAGCAAGGGCAGGGACCGAACCCGCAACCTCATGGTTCCTAGTCGGATTCGTTAACCACTGCGCCACGACGGGAACTCC	A	16	WXP2,WXP3,WXP4,WXP5,WXP6,WXP7,XP1,XP2,XP3,XP4,XP5,XP6,XP7,LW4,LW5,LW6,LW7,LA6,DU7	-	-	intergenic_variant	MODIFIER	-	-	-	6	7	6	19
sv_00758	1	47029475	47032188	2713	DEL	TAAATAGAGTCAGGAAACTTTGGTGCCCATCCTCCTTAAACTCTTTCAAAAGGTTGAAGAAGAAGGAATACTCCCAAAGACATTCTATGAGGCCACCATCACCCTCATTCCAAAACCAGGCAGAGATACCACCAAAAAAGAAAACTATCGCCCAATATCATTGATGAATATAGATGCAAAACTTCTCAACAAAATCTTAGCCAACCGAATCCAACAACATATCAAAAAAATTATACACCATGACCAGGTTGGGTTCATCCCAGGTTCACAAGGATGGTTCAACATACGCAAATCAATCAACATCATACACCACATTAACAAAAAAAAAGTCAAAAATCATATGATCATCTCAATAGATGCAGAAAAAGCATTTGACAAAGTTCAACATCCATTCATGAT…	T	5	XP2,XP6,LW4,LW5,DU5	-	-	intergenic_variant	MODIFIER	-	-	-	0	2	3	5
sv_00759	1	47060603	47060924	321	DEL	TATTAAATAGTATAATATTTATTTATTTATTTATTTATTTTTGCCTTTGTCTTTTTGTCTTTTGTCGTTGTTGTTGTTGTTGCTATTTCTTGGGCCGCGCCCGAGGCATATGGAGGTTCCCAGGCTAGGGGTTGAATCGGAACTGTAGCCACCGGCCTACGCCAGAGGCACAGCAACGCGGGATCCGAGCCGCGTCTGCAACCTACACCACAGCTCACGGCAACGCCGGATCATTAACCCACTGAGCAAGGGCAGGGACCGAACCCGCAACCTCATGGTTCCTAGTCGGATTCGTTAACCACTGCGCCACGACGGGAACTCC	T	15	WXP3,WXP4,WXP5,WXP6,XP1,XP2,XP3,XP4,XP5,XP6,XP7,LW5,DU7	-	-	intergenic_variant	MODIFIER	-	-	-	4	7	2	13
sv_00760	1	47127128	47127215	87	DUP:TANDEM	AGTTATGCCACGGTAAATAAGAACCAAATCTCAACAGCTCAGTGCATCAGAGGCCCCTGACTGACCCACATGCTTGTCACATGCTCAT	AGTTATGCCACGGTAAATAAGAACCAAATCTCAACAGCTCAGTGCATCAGAGGCCCCTGACTGACCCACATGCTTGTCACATGCTCATGTTATGCCACGGTAAATAAGAACCAAATCTCAACAGCTCAGTGCATCAGAGGCCCCTGACTGACCCACATGCTTGTCACATGCTCAT	3	WXP2,LA5	-	-	intergenic_variant	MODIFIER	-	-	-	1	0	1	2
sv_00761	1	47173090	47173170	80	DEL	GTTCTGAAAAAGGTTAAACTATAGGGATTTTGCCAGTGTTTAGGTGGGAGGGAGGGATGAATCAGGTGAGCACTTAGGATA	G	15	WXP2,WXP6,WXP7,XP3,XP6,XP7,LW4,LW5,LW6,LW7,LA5,LA6,LA7,DU7	-	-	intergenic_variant	MODIFIER	-	-	-	3	3	8	14
sv_00762	1	47261461	47261786	325	DEL	AATACTTTTCCGGAGTTCCCGTCGTGGCGCAGTGGTTAACGAATCCGACTAGGAACCATGAGGTCGCGGGTTCGGTCCCTGCCCTTGCTCAGTGGGTTAACGATCCGGCGTTGCCGTGAGCTGTGGTGTAGGTCGCAGACGCGGCTCGGATCCCACGTTGCTGTGGCTCTGGCGTAGGCCGGTGGCTACAGCTCCGATTCGACCCCTAGCCTGGGAACCTCCATATGCCGCGGGAGCGGCCCAAGAAATAGCAACAATAACAACAACAACAACAACAACAACAAAAAAAAAAAGACAAAAGACAAAAAAAAAATATATATATATAT	A	12	WXP4,WXP6,WXP7,XP1,XP2,XP3,XP4,XP6,XP7,LW4,LW6,LA5,LA6,DU7	-	-	intergenic_variant	MODIFIER	-	-	-	3	6	5	14
sv_00763	1	47320273	47320451	178	DEL	GCACGTATCTCTTTTTTTTTTTTTTTTTTTTTTTTTTTTTTTTTTTTTTTTTTTTTTTTTTTTTTGAACTCCTCATATGATTCTTTAATCGAGCTTAGCCAGCTACGAAACACACCAATCCCCGCCCACCACACCCCCCCCCTACCCTACACAATCACCCCCCATGCTATCCCCACGCC	G	13	WXP2,WXP6,WXP7,XP1,XP2,XP3,XP6,LW1,LW2,LW3,LW4,LW5,LW6,LW7,LA1,LA2,LA4,LA5,LA6,LA7,DU1,DU2,DU3,DU4,DU6,DU7	-	-	intergenic_variant	MODIFIER	-	-	-	3	4	19	26
sv_00764	1	47328903	47329203	300	DEL	TTTTCTACATATTTATTTTTTTTTTTTTTTTTTTTTTTTTTTTTTTTTTTTTGTCTTTTTGCTATTTCTTGGGCCGCTCCTGCGGCATATGGAGGTTCCCGGGCTAGGGGTCCAATCGGAGCTGTAGCCACCGGCCTACACCAGAGCCACAGCAACGCAGGATCCGAGCCGCGTCTGCAACCTACACCACAGCTCACGGCAACGCCGGATCGTTAACCCACTGAGCAAGGGCAGGGACCGAACCCGCAACCTCATGGTTCCTAGTCGGATTCGTTAACCACTGCGCCACAACGGGAACTCC	T	17	WXP3,WXP5,WXP6,WXP7,XP1,XP2,XP3,XP4,XP5,XP6,XP7,LW1,LW2,LW4,LW6,LW7,LA1,LA2,LA3,LA4,LA5,LA6,DU1,DU5,DU6,DU7	-	-	intergenic_variant	MODIFIER	-	-	-	4	7	15	26
sv_00765	1	47473277	47474587	1310	DEL	AAATATCTCCATATATTTTTAAACATAAAAGTTGTCTTTATTTTCAAGAAAAAGTCAATATATGTGATAAGAGAGCTTAGTTAATATGTTCTTTCATTATGGTTAACATATAAAGATTTTTACTTCATTTACATTGACTTCCTAGAGGAAAGAATGTATAAGAACAAATATGATTATTGGAAGTATATTCATACAAGCATTTAAAGAATCTTAGCAAATCAGCTTCCATGAAAATATTCATATGCCATAGAACTATTCAGTACACTATAAACCTCACTGTTCTCAGAGGTTCAAGGACAGGGTTAAGCCCAAAATTACCTGATTGTACATAACAAGGACAATGGTGATATCTTTGATAATGACAGGGAATCTGAGAGAGGGAGTATCAGAGAAAAAGAT…	A	10	XP2,XP3,XP4,XP5,XP6	-	-	intergenic_variant	MODIFIER	-	-	-	0	5	0	5
sv_00766	1	47598082	47598308	226	DEL	TATAGTCTTTTTTCTATAAATACAAAAATTCTTAAACAGAGACATAAAAATTAGATCCTAATTGACAATGGAGAATAGAATTACAGCTGAATAAAATGGAAAATACGTTTGCAAATTTTTTTTTGGATGTGCCCGTGGTATGTGGAAGTTCCCACTCCAGGAATCTAACCCATGCCATAGCAGCGACCTGAACCACTGCAGTGACAATGCAGGATCCTTAACCCTGC	T	12	WXP1,WXP2	-	-	intergenic_variant	MODIFIER	-	-	-	2	0	0	2
sv_00767	1	47729499	47730683	1184	DEL	ATGACTATAAAAATAATTTTATTGGTATATAATTTAAACATAACAAAATGCATAGATCATATATATATATACTATATATATGATGAGTCTTACAACCTACAATCCAAACAAAAAGTAGAAAACTCCCATTATCCTAGAATTTCCTTCATTTCAGTTTTATAGTCAAACCACACCTACTGGTTTTACCGTTTCTATCTCTGTAGCTTAGTCATGACTTTATTTAGAACTTTCTAAAGTGGCTTCAACCACAAACTGCTTTATATATTTATTCACTATATGCATATATATGTATGTATATGTGTATATATATATATGTTTTGAATATATGTGTATGTGCATTCATGTATATATATATACACACACATGAAAGTAATATATGATAATGATATGTATATATAT…	A	6	XP3,XP4,XP6,LW4,LW5	-	-	intergenic_variant	MODIFIER	-	-	-	0	3	2	5
sv_00768	1	47782872	47783058	186	DEL	AAATATTTTCAAAATACATATTTAAGAGAGTTCCTGTTGTGGCTCAATGGGTTATGAACCTGACTAGGATCCATGAGGATGCAAGTTCAATCTCTGGCCCTGCTCAGTGAGTTAAGGATCCGGCATTGCCATGAGCTGTGGCGTAGTTGCAGATGCAGCTTGGATCCTGTGTTGCTGTGGCTGCAGT	A	19	WXP2,WXP4,WXP6,WXP7,XP1,XP3,XP5,XP6,XP7,LW4,LW5,LW6,LW7,LA5,LA6,LA7	-	-	intergenic_variant	MODIFIER	-	-	-	4	5	7	16
sv_00769	1	47858963	47859254	291	DEL	CAAGAATGACTCCATGGAGTTCCCGTCGTGGCGCAGTGGTTAACGAATCCGACTAGGAACAGTGAGGTTGCGGGTTCGGTCCCTGCCCTTGCTCAGTGGGTTAAGGATCCGGCGTTGCCGTGAGCTGTGGTGTTAGTTGCAGACGTGGCTCAGATCCCACGTTGCTGTGGCTCTGGCGTAGGCGGGTGGCTACAGCTCCGATTGGACCCCTAGCCTGGGAATCTCCATATGCCGCAGAAGCGGCCCAAGAAATAGCAAAAAGACAAAAAAAAAAAAAAAAAAAAAAAAAAAA	C	18	WXP1,WXP2,WXP3,WXP4,WXP5,WXP6,WXP7,XP1,XP2,XP3,XP6,XP7,LW5,LW6,LW7,LA5,LA6,LA7,DU7	-	-	intergenic_variant	MODIFIER	-	-	-	7	5	7	19
sv_00770	1	48100024	48100338	314	DEL	CAGAAAATAAGGAAGACGAGGAGTTCCCGTCGTGGCGCAGTGGTTAACGAATCCGACTAGGAACCATGAGGTTGCGGGTTCGGTCCCTGCCCTTGCTCAGTGGGTTAACGATCCGGCGTTGCCGTGAGCTGTGGTGTAGGTCGCAGACGCGGCTCGGATCCCGCGTTGCTGTGGCTCTGGCGTAGGCCGGTGGCTACAGCTCCGATTCAACCCCTAGCCTGGGAACCTCCATATGCCGCGGGAGCGGCCCAAGAAACAGCAACAACAACAACAACAAAAAAAGACAAAAAAAAAAAAAAAAAAAAAAAAAAAAAA	C	19	XP3,XP4,XP5,XP7,LW4,LW5,LW6,LW7,LA5,LA7,DU3,DU5,DU6	-	-	intergenic_variant	MODIFIER	-	-	-	0	4	9	13
sv_00771	1	48101496	48101818	322	DEL	TTCATTGATAGTATTTTTTTTTTTCCTAAATATATACCTCAGAGTTTTTTGTTTCTTTTTGTCTTTTGTTGTTGTTGTTGTTGCTATTTCTTGGGCCGCTCCCGCAGCATATGGAGGTTCCCAGGCTAGGGGTTGAATCGGAGCTGTAGCCACCGGCCTACGCCAGAGCCACAGCAACGCGGGATCCGAGCCGCGTCTGCGACCTACACCACAGCTCACGGCAATGCCGGATCGTTAACCCACTGAGCAAGGGCAGGGACCGAACCCGCAACCTCATGGTTCCTAGTCGGATTTGTTAACCACTGCGTCACGACGGGAACTCC	T	14	WXP6,XP3,XP5,XP6,LW4,LW5,LW7,LA4,LA6,LA7,DU3,DU5,DU7	-	-	intergenic_variant	MODIFIER	-	-	-	1	3	9	13
sv_00772	1	48245329	48245834	505	DEL	AAATTAAATTACAGGAGTTCCCGTGGTGGCGCAGTGGTTAACGAATCCAACTAGGAACCATGAGGTTGCGGGTTCAGTCCCTGCCCTTGCTCAGTGGGTTAACGATCTGGCCTTGCCATGAGCTGTGGTGTAGGTTGCAGACGCGGCTCGGATCCCGCGTTGCTGTGGCTCTGGCGTAGGCCGGTGGCTACAGCTCAGATTCAACCCCTAGCCTGGGAACCTCCATATGCCGCGGGAGCGGTCCAAGAAATAGCAACAACAACAACAACAACAACGACAAAGGACAAAAGACAAAAGAATAGATTTACAAGGAGATCCTGCTGAATAGCATTGAGAACTTTGTCTAGATACTCATGTTGCAACAGAAGAAAGGGTGGGGGAAAAAATGTAATTGTAATG…	A	11	XP1,XP3,XP6,XP7,LW4,LW5,LW6,LW7,LA4,LA5,LA6,LA7,DU7	-	-	intergenic_variant	MODIFIER	-	-	-	0	4	9	13
sv_00773	1	48293669	48293956	287	DEL	TAGAGCTTTATTTATTTATTTATTTATTTTTTGTCTTTTGTTGTTGTTGTTTGTTGTTGTTGTTGTTGCTATCTCTTGGGCTGCTTCCGCGGCATATGGAGGTTCCCAGGCTAGGGGTTGAATCTACGCCAGAGCCACAGCAACGCGGGATCCGAGCCGCGTCTGCAACCTACACCACAGCTCATGGCAACGCCGGATCGTTAACCCACTGAGCAAGGGCAGGGACCGAACCCGCACCTCATGGTTCCTAGTCGGATTCGTTAACCACTGCGCCACGACGGGAACTCC	T	13	WXP1,WXP4,WXP6,WXP7,XP1,XP3,XP5,XP6,LW4,LW5,LW7,LA6,DU4,DU6,DU7	-	-	intergenic_variant	MODIFIER	-	-	-	4	4	7	15
sv_00774	1	48352128	48352205	77	DEL	AATGTATCACACCATCAAATGTGCTGATGGTGTGATCATATCATATTAAATCTGATATGATTCAGATTTAATCATATC	A	19	WXP2,WXP3,WXP4,WXP5,WXP6,WXP7,XP1,XP2,XP3,XP4,XP5,XP6,XP7,LW4,LW5,LW6,LW7,LA6,DU6,DU7	-	-	intergenic_variant	MODIFIER	-	-	-	6	7	7	20
sv_00775	1	48479614	48479864	250	DEL	TTTATTTATTTATTTATTTATTTATTTTTTTTTTTTTTGTTGTTGCTGTTGCTGCTATCTCTTGGCGCTTCCGGCATATGGGTTCCAGCTATTGATCGGAGCTGTAGCCACCGCCTACCCAGAGCCACAGCAACTCGGATCCGAGCCGCATCTGCAACCTACACCACAGCTCACGCAACGCGGATCGTTAACCACTGAGCAAGGCAACGAACCCGACCTCATGTTTAGTCGATTCGTTAACCATGCCACGC	T	7	DU5,DU6	-	-	intergenic_variant	MODIFIER	-	-	-	0	0	2	2
sv_00776	1	48637944	48638015	71	DEL	CAAGCTTGATGAAGTGGCCTCATGTAGGAGAGGTCATATAGGGTCTAGCAGCATGCTCCCCTCTGGTTACTA	C	20	LW6,LW7,LA6	-	-	intergenic_variant	MODIFIER	-	-	-	0	0	3	3
sv_00777	1	48648501	48651172	2671	DEL	TCCTAATCTTAAGGAAAAATCTTTTATATTTTCACAATTGGGTATTAGCTGTGGGCTTGTCATGTATGGCCTCTATCATATTGAATATTCTCCTTTTATACTCACTTTGTTGAGAGTTAACATAAATGGATGTTGACTGTATTGTACAATATTTACTATTTAATTATTGTACTACTGTCAGTTTCTCCTTTATGTCAGTTAATATTTGCTTTATGTATCTATGTACTTCTATGTTGAGTGCAAAACTGTTTATCAATGTTATGTCAACTTCTTGGATTGACCACTTTAGCATTTTGTCATGCCCTTCTTTGTATTTTGTTTCATTCTTTGTTTTGAAGTCTGGTTTATCTGATATGAGTATTTCCACCTCAGATAGCTTTGTATTTCCATTTGCATGAA…	T	5	XP1,LW4,LW5	-	-	intergenic_variant	MODIFIER	-	-	-	0	1	2	3
sv_00778	1	48656156	48656223	67	DEL	CATCTATGTTCATCAGTGAAATTGGCCTGTAGTTTTCTTTTTTTGTGGTGTCTTTGTCTGGTTTTGGT	C	13	WXP2,WXP7,XP2,XP3,XP4,XP5,XP7,LW6,LW7,LA7	-	-	intergenic_variant	MODIFIER	-	-	-	2	5	3	10
sv_00779	1	48876227	48879126	2899	DEL	TGACTTTTGTATACTTCTTCTCTCCATGCCCACTGTTGGCACCATTGTCACTCGTGGTGGCCTCCTAAGTTGCTTTTTCACATCCATTCTTACCTCCCTCAAATCGTTCCTCATATTGAAATGAGAATGAACTATTAAAAATGTAAGTCTGAATGAGTTACTTCTCTGTTGACAATCCATCAATCAATATCACTATTAAGATAAAGACCTACTATTTTATCTAATCTTTATCAACAACCTCAATTGCTGTGACCCCCCCCCCTTTTCATATTCCCCTCACCTGGGTTTTCTTTTTCTAAAATGTGTTCTGCTCCCACCTGCCTCAATATGTCTGCACCCTCTGTTCCCCTTGTGTGGAGTGATTAGCAATCTCTGATTGCCCTTTAGATCTCAGGAAAA…	T	10	XP4,XP5	ENSSSCG00000047735	ENSSSCT00000073390.1	intron_variant,non_coding_transcript_variant,feature_truncation	MODIFIER	-	lncRNA	INTRON=1/2,STRAND=-1	0	2	0	2
sv_00780	1	48944462	48944570	108	DUP:TANDEM	TTTGAAGTTTGCTAATATTTTGTTGAGTTTTGCATCTGTGTTCATCAGCAATATTGGCCTGTAATTTTCTTTTTTGTGTGGTGTCTTTGTGTGGTTTTGGTATCAGGGT	TTTGAAGTTTGCTAATATTTTGTTGAGTTTTGCATCTGTGTTCATCAGCAATATTGGCCTGTAATTTTCTTTTTTGTGTGGTGTCTTTGTGTGGTTTTGGTATCAGGGTTTGAAGTTTGCTAATATTTTGTTGAGTTTTGCATCTGTGTTCATCAGCAATATTGGCCTGTAATTTTCTTTTTTGTGTGGTGTCTTTGTGTGGTTTTGGTATCAGGGT	6	WXP5,WXP6,LW4,LW5,LA4,LA5	ENSSSCG00000004270	ENSSSCT00000066143.2	intron_variant	MODIFIER	ADGRB3	protein_coding	INTRON=1/29,STRAND=1	2	0	4	6
sv_00781	1	49054918	49055216	298	DEL	ACCATTATTACTTTTTTTTTTAATTTATTTTTTTTTTTTTGTCTTTTGTTGTTGTTGTTGCTATTTCTTGGGCTGTTCCCGCGGCATATAGAGGTTCCCAGGCTAGGGGTTGAATCGGAGCTGTAGCCACCGGCCTACGCCAGAGCCACAGCAACGCGGGATCCGAGCCGTGTCTGCAACCTACACCACAGCTCACGGCAACGCCGGATCGTTAACCCACTGAGCAAGGGCAGGGACTGAACCCGCAACCTCATGGTTCCTAGTCGGATTCGTTAACCACTGTGCCACGACGGGAACTC	A	14	WXP3,WXP4,WXP5,XP1,XP2,XP3,XP4,XP6,LW7,LA4,LA6,LA7,DU7	ENSSSCG00000004270	ENSSSCT00000066143.2	intron_variant,feature_truncation	MODIFIER	ADGRB3	protein_coding	INTRON=1/29,STRAND=1	3	5	5	13
sv_00782	1	49182510	49182826	316	DEL	TAAGAAAATGCAGAGGAGTTCCCGTCGTGGCGCAGTGGTTAACGAATCCGACTAGGAACCATGAGGTTGCGGGTTCGGTCCCTGCCCTTGCTCAGTGGGTTAACGATCCGGCGTTGCCGTGAGCTGTGGTGTAGGTCGCAGACGCGGCTCGGATCCCGTGTTGCTGTGGCTCTGGCATAGGCCGGTGGCTACAGCTCCGATTCAACCCCTAGCCTGGGAACCTCCATATGCCGCGGGAGCGGCCCAAGAAATAGCAACAACAACAACAACAGACAAAAAGACAAAAGACAAAAAAAAAAAAAAAAAAAAAAAAAAAA	T	18	WXP2,WXP3,WXP4,WXP5,WXP6,WXP7,XP1,XP2,XP3,XP4,XP6,XP7,LW4,LW5,LW6,LW7,DU1,DU2,DU5,DU7	ENSSSCG00000004270	ENSSSCT00000066143.2	intron_variant,feature_truncation	MODIFIER	ADGRB3	protein_coding	INTRON=1/29,STRAND=1	6	6	8	20
sv_00783	1	49205237	49205347	110	DUP:TANDEM	AGAAAGGAAAGAGTAGACCTGCTATTTCTAGTTAGAGTTACTGGTTATTGATTTATGTACTGTGTCTGAAAACAGTGACTGGTGTTGGTTGGGAGAGGTGGGCCAGAGGCA	AGAAAGGAAAGAGTAGACCTGCTATTTCTAGTTAGAGTTACTGGTTATTGATTTATGTACTGTGTCTGAAAACAGTGACTGGTGTTGGTTGGGAGAGGTGGGCCAGAGGCAGAAAGGAAAGAGTAGACCTGCTATTTCTAGTTAGAGTTACTGGTTATTGATTTATGTACTGTGTCTGAAAACAGTGACTGGTGTTGGTTGGGAGAGGTGGGCCAGAGGCA	7	XP3,XP5,XP6,LW4,LA5,DU6,DU7	ENSSSCG00000004270	ENSSSCT00000066143.2	intron_variant	MODIFIER	ADGRB3	protein_coding	INTRON=4/29,STRAND=1	0	3	4	7
sv_00784	1	49233949	49234101	152	DEL	CTTATTCCTGTCAAAATTAACATATTTCAGAATTAAGTATAACCAATGACTTTCTTATGAATTAATCTTAATAAAAATAATTCAGTTAATCTTCATAATATCCATATTTAGTTCTTGTTTATTCCTGGTAATAAATGAGAGGAATTGCATTGG	C	7	WXP6,XP3,XP6,XP7	ENSSSCG00000004270	ENSSSCT00000066143.2	intron_variant,feature_truncation	MODIFIER	ADGRB3	protein_coding	INTRON=8/29,STRAND=1	1	3	0	4
sv_00785	1	49602191	49602507	316	DEL	TAAAAAATTATCAGGAGTTCCCGTCGTGGCGCAGTGGTTAACGAATCCGACTAGGAACCATGAGGTTGCGGGTTCGGTCCCTGCCCTTGCTCAGTGGGTTAACGATCTGGCGTTGCCGTGAGCTGTGGTGTAGGTCACAGACGCGGCTCGGATCCCGCGTTGCTGTGGCTCTGGCGTAGGCCGGTGGCTACAGCTCCGATTCAACCCCTAGCCTGGGAACCTCCATATGCCTTGGGAGCGGCCCAAGAAATAGCAACAACAGCAACAACAACAACAACAGACAAAAAGACAAAAGACAAAAGACAAAAGACAAAAAA	T	14	WXP4,WXP6,XP1,XP3,XP4,XP5,XP6,XP7,LW6,LW7,LA5,LA7	ENSSSCG00000004270	ENSSSCT00000066143.2	intron_variant,feature_truncation	MODIFIER	ADGRB3	protein_coding	INTRON=28/29,STRAND=1	2	6	4	12
sv_00786	1	49629745	49630073	328	DEL	TTAAAATTTATAAACACTGGAGTTCCCGTCGTGGCGCAGTGGTTAACGAATCCGACTAGGAACCATGAGGTTGCGGGTTCGGTCCCTGCCCTTGCTCAGTGTGTTGACGATCCGGCGTTGCCGTGAGCTGTGGTGTAGGTTGCAGACGCGGCTCGGATCCCGCTTTGCTGTGGCTCTGGCGTAGGCCGGTGGCTACAGCTCCGATTCAACCCCTAGCCTGGGAAACTCCATATGCCGCAGGAGCGGCCCAAGAAATAGCAACAACAACAACAAAGGACAAAAAGACAAAAAAAAGACAAAAAAAAATAAAAAAATAAAAAATAAAAAAA	T	19	XP3,LW1,LW3,LW6,LW7,LA6,LA7	-	-	intergenic_variant	MODIFIER	-	-	-	0	1	6	7
sv_00787	1	49643545	49643832	287	DEL	GAGAAGGCACAGGGAGTTCCGTCGTGGCGCAGTGGTTAACGAATCTGACTAGGAACCATGAGGTTTCGGGTTCGGTCCCTGCCCTTGCTCAGTGGGTTAACGATCCGGCGTTGCCGTGAGCTGTGGTGTAGGTTGCAGATGCGGCTCGGATCCCGCGCTGCTGTGGCTTTGGCGTAGGCCACTGGCTACAGCTCCGATTCGACCCCTAGCTGGGAACCTCCATATGCCGCGGGAGCGGCCCAAGAAATAGCAACAACAACAACAACAACAACGACCAAAAAAAAAAAA	G	7	XP3,XP6	-	-	intergenic_variant	MODIFIER	-	-	-	0	2	0	2
sv_00788	1	49695657	49695971	314	DEL	TAAAGATTTTCATTCGGGAGTTCCCGTCGTGGCGCAGTGGTTAACGAATCCGACTAGGAACCATGAGGTTGCGGGTTCGGTCCCTGCCCTTGCTCAGTGGGTTAATGATCCGGCGTTGCCGTGAGCTGTGGTGTAGGTTGCAGACGCGGCTCGGATCCCGCGTTGCTGTGGCTCTGGCGTAGGCCGGTGGCTACAGCTCCGATTCAACCCCTAGCCTGGGAACCTCCATATGCCGCGGGAGCGGCCCAAGAAATAGCAACAATAACAACAACAACAACAACAAAAAAAGACAAAAGACAAAAAAAAAAAAAAAAA	T	15	WXP6,WXP7,XP1,XP3,XP6,LW1,LW2,LW3,LW4,LW6,LW7,LA1,LA2,LA4,LA5,LA6,LA7,DU1,DU2,DU4	-	-	intergenic_variant	MODIFIER	-	-	-	2	3	15	20
sv_00789	1	49904332	49904620	288	DEL	GCTATACTGGAGTTCCCGTGGTGGCGCAGTGGTTAACGAATCCGACTAGGAACCATGAGGTTGCGGGTTCGATCCCTGCCCTTGCTCAGTGGGTTAAAGATCCGGCGTTGCCGTGAGCTGTGGTGTAGGTCGCAGACGCGGCTCGGATCCCGAGTTGCTGTGGCTATGGTGTAGGCCAGTGGCTACAGCTCCGATTAGACCCCTAGCCTGGGAACCTCCATATGCCGTGAGAGCGGCCCAAGAAATGGCAAAAAGACAAAAAAAAAAAAAAAAAAAAAAAAAAAAAGGT	G	15	WXP1,WXP4,WXP5,WXP6,XP1,XP2,XP3,XP4,XP5,XP6,XP7,LW4,LW5,LW7,LA4,LA6	ENSSSCG00000004272	ENSSSCT00000004721.4	intron_variant,feature_truncation	MODIFIER	LMBRD1	protein_coding	INTRON=10/16,STRAND=-1	4	7	5	16
sv_00790	1	49918390	49918698	308	DEL	GGGATTATAATAATTTTTTTTTTTTTTTTTTTTTTTGTCTTTTGTCTTTTGTTGTTGTTGCTGTTGTTGCTATTTCTTGGGCCACTCCCGCGGCATATGGAGGTTCCCAGGCTAGGGGTTGAATCGGAGCTGTAGCCACCGGCCTACGCCAGAGCCACAGCAACGCGGGATCCGAGCCGCGTCTGCGACCTACACCACAGCTCACGGCAACGCCGGATTGTTAACCCACTGAGCAAGGGCAGGGACCGAACCCGCGACCTCATGGTTCCTAGTCGGATTCGTTAACCACTGCGCCACGACGGGAACTCC	G	9	WXP4,XP1,XP2,XP3,XP5,XP6,XP7,DU6	ENSSSCG00000004272	ENSSSCT00000004721.4	intron_variant,feature_truncation	MODIFIER	LMBRD1	protein_coding	INTRON=8/16,STRAND=-1	1	6	1	8
sv_00791	1	49945440	49945751	311	DEL	CAAAACCATCCTGGAGTTCCCGTCGTGGCGCAGTGGTTAGCGAATCCGACTAGGAACCATGAGGTTGCGGGTTCGGTCCTTGCCCTTGCTCAGTGGGTTAACGATCCGGCGTTGCCGTGAGCTGTGGTGTAGGTTGCAGACGCGGCTCGGATCCCGCGTTGCTGTGGCTCTGGCGTAGGCCGGTGGCTACAGCTCCGATTCAACCCCTAGCCTGGGAACCTCCATATGCCGCGGGAGCGGCCCAAGAAATAGCAACAACAACAACAACAACAACAAAAGACAAAAAATAAAATAAAATAAAAAAAAATTAAA	C	7	XP1,XP3,XP6	ENSSSCG00000004272	ENSSSCT00000004721.4	intron_variant,feature_truncation	MODIFIER	LMBRD1	protein_coding	INTRON=3/16,STRAND=-1	0	3	0	3
sv_00792	1	50026644	50027109	465	DEL	AGCATGAGGCTGGCTTTCCCTCTCCCCCAGTGATTTCTACTTCTGTCCTATACTTCCAAATGCCATCCTGGAGTTCCTGTAGTGGCTCAAAGGAAACGAATCTGACTAGCATCCATGAGGACGCAGGTTTGAGACTTGGCCTTGCTCAGTGGGTTAAGGATCCAGTGTTGCCATGAGCTCTGGTGCAGGTTGAAGATGTGGCTCAGATCTGGCATTGCTGTGGCTGTGGTGTAGGCCAGCAGCTGTAGCTCCAATTGGATTCCCAGCCTGGGAACCTCCCTGTGCTGCGGGTATGGCCCTAAAAAAAAAAAGAAAAAAAAAAAAAAGGCCATCATGAGGAGAAATAGGGGAAGGCGCATGAGACATTGTTGCAGGATTACTTTAGGATTATGCTAACAG…	A	3	XP3,XP5,XP6	-	-	intergenic_variant	MODIFIER	-	-	-	0	3	0	3
sv_00793	1	50356383	50356693	310	DEL	TAAAAAGAGCAGATGGAGTTCCCGTCGTGGCGCAGTGGTTAACGAATCCGACTAGGAACCATGAGGTTGCGGGTTCGGTCCCTGCCCTTGCTCAGTGGGTTAACGATCCGCGTTGCCGTGAGCTGTGGTGTAGGTTGCAGACGCGGCTCGGATCCTGCGTTGCTGTGGCTCTGGCGTAGGCCGGTGGCTACAGCTCCGATTCAACCCTAGCCTGGAACCTCCATATGCCGCGGGAGCGGCCAAGAACCAAGCGATAGCAACAATAACAACAAAAAAAAAAAAAAAAAAAAAAAGAAAAAAAACAAAAAAAA	T	18	WXP2,WXP3,WXP5,WXP6,WXP7,XP2,XP3,XP4,XP6,XP7,LW4,LW5,LW6,LW7,LA4,LA6,LA7,DU5,DU7	ENSSSCG00000044472	ENSSSCT00000074211.1	intron_variant,feature_truncation	MODIFIER	COL19A1	protein_coding	INTRON=41/51,STRAND=1	5	5	9	19
sv_00794	1	50463784	50464078	294	DEL	GCTCCCATCAATATTATATATATATATATTTTTTTTTTTTTTTGTCTTTTTTTTTGCTATTTCTTGGGCCGCTCCAGCAGCATATGGAGGTTCCCAGGCTAGGGGTCGAATCGGAGCTGTAGCCACCGGCCTACGCCAGAGCCACAGCAACGCAGGATCTGAGCCGCGTCTGCAACCTACACCACAGCTCACGGCAACGCCGGATCGTTAACCCAGTGAGCAAGGGCAGGGACCGAACCCGCAACCTCATGGTTCCTAGTCGGATTCGTTAACCACTGCGCCACCACAGGAACTC	G	10	WXP4,XP1,XP3,XP5	ENSSSCG00000004274	ENSSSCT00000004723.4	intron_variant,feature_truncation	MODIFIER	COL9A1	protein_coding	INTRON=8/31,STRAND=-1	1	3	0	4
sv_00795	1	50475780	50476009	229	DEL	CAAGACATATGGTTTGGGCAGTGAACGATGATAGACATGAGTTGGGGGTGCCTGCCAGGGACGATGGGTGGTGGTGTAGGTGAGACGGGTGGATGAGTGGGCTTGGGAGGGTGGCTACAGTCGATTCAGTAGCTGGAATCATATGCAGACGCCAAAAAAAAAAAAAAAAAAACAACAAAAAAAAAAAAAAAAAAAAAAAAAAAAAAAAAAAAAAAAAAAAAAAAAAAAAA	C	19	WXP1,WXP2,WXP3,WXP4,WXP6,XP1,XP2,XP3,XP4,XP5,XP6,XP7,LW4,LW5,LW6,LW7,LA6,LA7,DU3,DU4,DU5,DU6,DU7	ENSSSCG00000004274	ENSSSCT00000004723.4	upstream_gene_variant	MODIFIER	COL9A1	protein_coding	DISTANCE=2094,STRAND=-1	5	7	11	23
sv_00796	1	50508463	50508771	308	DEL	CAAAAGATGGATTAAATAGGAGTTCCCGTCGTGGCGCAGTGGTTAACGAATCCGACTAGGAACCATGAGGTTGCGGGTTCGGTCCCTGCCCTTGCTCAGTGGGTTAACGATCCGGCGTTGCCATGAGCTGTGGTGTAGGTTGCAGACGCGGCTCGGATCCTACGTTGCTGTGGCTCTGGCGTAGGCCGGTGGCTACAGCTCCGATTCAACCCCTAGCCTGGGAACCTCCATATGCCGCGGGAGTGGCCCAAGAAATAGCAACAATAACAACAACAACAACAAAAAAAGACAAAAGACAAAAAAAAAAAA	C	14	WXP2,WXP6,WXP7,XP3,XP6,LW4,LW5,LA5	-	-	intergenic_variant	MODIFIER	-	-	-	3	2	3	8
sv_00797	1	50524448	50524731	283	DEL	TATAATGATTTATACTGGAGTTCCCATCGTGGCGCAGTGGTTAACGAATCCGACTAGGAACCATGAGGTTGCGGGTTCGGTCCCTGCCCTTGCTCAGTGGGTTAGCGATCCGGCGTTGCCGTGAGCTGTGGTGTAGATCGCAGACGCAGCTCGGATCCCACGTTGCTGCGGCTCTGGTGTAGGCCGGCGGCTACAGCTCCGATTTGACCCCTAGCCTGGGAACCTCCATATGCCGCAGGAGCGGCCAAAGAAATAGCAAAAAGACAAAAAAAATAAATAAATAA	T	9	XP3,XP6	-	-	intergenic_variant	MODIFIER	-	-	-	0	2	0	2
sv_00798	1	50726864	50727151	287	DEL	CAAATTGGCTTTATTTCGGGAGTTCCTGTCGTGGTGCAGTGGTTAACGAATCCGACTAGGAACCATGAGGTTGCGGGTTCGATCCCTGCCCTTGCTCAGTGGGTTAAGGATCCGGCGTTGCCATGAGCTGTGGTGTAGATTGCAGACGCGGCTCGGATCACGCGTTGCTGTGGCTCTGGCGTAGGCCGGTGGCTGCAGCTCTGATTAGACCCCTAGCCTGGGAACCTCCATATGCCGCTGGAGCGGCCCAAGAAATGGCAAAAAGACAAAAAAAAAAAAAAAAAAAAA	C	11	XP3,XP4,XP6,LW4,LW5,LW6,LW7,LA6	ENSSSCG00000004276	ENSSSCT00000052276.2	intron_variant,feature_truncation	MODIFIER	SMAP1	protein_coding	INTRON=1/10,STRAND=1	0	3	5	8
sv_00799	1	50928708	50928857	149	DEL	TTTCCATAGTGGCTGCACCAATTTACATTCCCAACAGTGTAGGAGGCTTCCCTTTCCCCCCCACCCTCTACAGCATTTATTATTTGTAGACTTCTTGATGATGGCCATTCTAGCTGGTATGAGGTGGTAGGTACCTTATAGTAGTTTTGA	T	4	LW4,DU6	ENSSSCG00000004276	ENSSSCT00000004726.4	intron_variant,feature_truncation	MODIFIER	SMAP1	protein_coding	INTRON=8/11,STRAND=1	0	0	2	2
sv_00800	1	50948906	50949175	269	DEL	CTTTTTTTTTTTTTTTGGTCTTTTTGCTATTTCTTTGGGCCGCTCCCGCGGCATATGGAGGTTCCCAGGCTAGGGGTCGAATCGGAGCTGCAGCCACTGGCCTACGCCAGAGCCACAGCAACGCGGGATCCGAGCCGCGTCTGCAACCTACACCACAGCTCACGGCAACGCCGGATCCTTAACCCACTGAGCAAGGGCAGGGACCGAACCCGCAACCTCATGGTTCCTAGTCGGATTCGTTAACCACTGCGCCACGACGGGAACTCCCTT	C	16	WXP1,WXP7,XP2,XP4,XP5,LW5,LA4,LA5	ENSSSCG00000026246	ENSSSCT00000024170.3	intron_variant,feature_truncation	MODIFIER	B3GAT2	protein_coding	INTRON=2/3,STRAND=-1	2	3	3	8
sv_00801	1	50952152	50952422	270	DEL	GTCCGTATTGATTTCTATTTTTTGTCTTTTTAGCTATTTCTTGGGCCGCTCCCGCGGCATATGGAGGTTTCCAGGCTAGGGGTTGAATCGGAGCTGGAGCCACCGGCCTACGCCAGAGCCACAGCAACGCAGGATCTGAGCCGCGTCTGCAACCTACACCACAGCTCACGGCAATGCCGGATCCTTAACCCACTGAGCAAGGGCAGGGACCGAACCTGCAACCTCATGGTTCCTAGTCGGATTCGTTAACCACTGCGCCACGACGGGAACT	G	12	LW6,LW7,LA6,LA7,DU7	ENSSSCG00000026246	ENSSSCT00000024170.3	intron_variant,feature_truncation	MODIFIER	B3GAT2	protein_coding	INTRON=2/3,STRAND=-1	0	0	5	5
sv_00802	1	50963195	50963476	281	DEL	TAAAAACTGTAGACGGAGTTCCTGTCGTGGCGCAGTGGTTAACGAATCCGACTAGGAACCATGAGGTTGCGGGTTCGGTCCCTGCCCTTGCTCAGTGGGTTAACGATCCGGCGTTGCCGTGAGCTGTGGTGTAGGTTGCAGACGCGGCTCGGATCCAGCGTTGATATGGCTCTGGCGTAGGCCGGTGGCCACAGCTCCGATTCGACCCCTAGCCTGGGAACCTCCATATGCCACGGGAGCGGCCCAAAGAAATGGCAAAAAGACAAAAAAAAAAAAAAAAAA	T	10	WXP4,LW6,LA6,LA7	ENSSSCG00000026246	ENSSSCT00000024170.3	intron_variant,feature_truncation	MODIFIER	B3GAT2	protein_coding	INTRON=2/3,STRAND=-1	1	0	3	4
sv_00803	1	50994857	50995173	316	DEL	GCATTTAGGTACTCTTTTTTTTTTTTTTTTTTTTTTTTTTTTTTTTTTTGTCTTTTTGGTCTTTTGTTGTTGTTGTTGCTATTTCTTGGGCCGCTCCCGCGGCATATGGAGGTTCCCAGGCTAGGGGTCGAATCGGAGCTGCAGCCACTGGCCTACGCCAGAGCCACAGCAACGCGGGATCCGAGCCGCGTCTGCAACCTACACCACAGCTCACAGCAACGCCGGATCGTTAACCCACTGAGCAAGGGCAGGGACCGAACCCACAACCTCATGGTTCCTAGTCGGATTCGTTAACCACTGCGCCACGACGGGAACTC	G	14	WXP3,WXP5,WXP6,WXP7,XP1,XP2,XP3,XP4,XP6,XP7,LW4,LW5,LW6,LW7,LA5,LA6,LA7,DU6,DU7	ENSSSCG00000026246	ENSSSCT00000024170.3	intron_variant,feature_truncation	MODIFIER	B3GAT2	protein_coding	INTRON=2/3,STRAND=-1	4	6	9	19
sv_00804	1	51051676	51051742	66	DUP:TANDEM	GCTCAATACCAAAAACAAACAAACAAACAAACCAAAAAACCCCTTAAAAATGGGCAGAAGAACTAAA	GCTCAATACCAAAAACAAACAAACAAACAAACCAAAAAACCCCTTAAAAATGGGCAGAAGAACTAAACTCAATACCAAAAACAAACAAACAAACAAACCAAAAAACCCCTTAAAAATGGGCAGAAGAACTAAA	5	LW7,LA7	-	-	intergenic_variant	MODIFIER	-	-	-	0	0	2	2
sv_00805	1	51051676	51051676	62	INS	G	GCTCAATACCAAAAACAAACAAACAAACCAAAAAACCCCTTAAAAATGGGCAGAAGAACTAAA	5	WXP1,WXP2,XP2,XP5,LW4,LW6	-	-	intergenic_variant	MODIFIER	-	-	-	2	2	2	6
sv_00806	1	51062473	51062801	328	DEL	TGAAATATGAATCCTTTAGGAGTTCCCGTCGTGGCGCAGTGGTTAACGAATCCGACTAGGAACCATGAGGTTGCGGGTTCGGTCCCTGCCCTTGCTCAGTGGGTTAATGATCCGGCGTTGCCGTGAGCTGTGGTGTAGGTTGCAGACGCGGCTCAGATCCCGCGTTGCTCTGGCTCTGGCGTAGGCCAGTGGCTACAGCTCCGATTCAACCCCTAGCCTGGGAACCTCCATATGCCGCGGGAGCGGCCCAAGAAATAGCAACAACAACAACAACAAAAAGACAAAAGACAAAAAAAAAAAAAAAAAAAAAAAAAAGACAAAAAAAAAAA	T	17	WXP1,WXP3,WXP5,WXP6,WXP7,XP2,XP3,XP6,XP7,LA5,DU6,DU7	-	-	intergenic_variant	MODIFIER	-	-	-	5	4	3	12
sv_00807	1	51169510	51170321	811	DEL	TCATTTTATTTTATTTTTTTTTTTTTTTAATTTTTTTTTTTTATTAAATTTTATTTTCCCACTGTACAGCAAGGGGGTCAGGTTATCCTTACATGTATACATTACAATTACAGTTTTTCCCCCACCATTTCTTCTGTTGCAACATGAGTATCTAGACATAGTTCTCAATGCTATTCAGCGGGATCTCCTTGTAAATCTATTCTACGTTGTGACTGATAAGCCCAAGCTCCCGATCCCTCCCACTCCCTCCCCCTCCCATCAGGCAACCACAAGTCTCTTCTCCAAGTCCATGATTGATTTTCTTTTCTGAGGAGATGTTCATTTGTGCTGGATATTAGATTCCAGTTATAAGTGATGTCATATGGTATTTGTCTTTGTCTTTCTGGCTCATTTCACTCA…	T	19	WXP2,WXP3,WXP4,WXP6,WXP7,XP2,XP3,XP4,XP5,XP6,XP7,LW4,LW5,LW6,LW7,LA4,LA6,LA7,DU4,DU6	-	-	intergenic_variant	MODIFIER	-	-	-	5	6	9	20
sv_00808	1	51211563	51211831	268	DEL	TTATTTCTCTTTTTTTTTTTTTTTTTTGCTATTTCTTGGGCCACTCCCACGGCATATGGAGGTTCCCAGGCTAGGGGTCCAATCGGAGCTGTAGTCTCCGGCCTACGCCAGAGCCACAGCAACGCGAGATCTGAGCCGCGTCTGCAACCTACACCACAGCTCACGGCATCACCGGATCGTTAACCCACTGAGCAAGGGCAGGGACCGAACCCTCAACCTCAGGGTTCCTAGTTGGATTCGTTAACCACTGCGCCACGACGGGAACTCCC	T	19	WXP1,WXP7,XP2,XP3,XP5,XP6,XP7,LW5,LW6,LW7,LA4,LA5,DU7	-	-	intergenic_variant	MODIFIER	-	-	-	2	5	6	13
sv_00809	1	51252276	51252569	293	DEL	CAAAAGTAACAAAATAGGGGAGTTCCCGTCGTGGCGCAGTGGTTAACGAATCCGACTAGGGACCATGAGGTTGCGGGTTCGGTCCCTGCCCTTGCTCAGTGGGTTAACGATCCGGCGTTGCCGTGAGCTGTGGTGTAGGTTGCAGACGCGGCTCGGATCCCGCGTTGCTGTGGCTCTGGCGTAGGCCGGTGGCTACAGCTTCGATTCGACCCCTAGCCTGGGAACCTCCATATGCCGCGGGAGCGGCCCAAGAAATAGCAACAATAACAACAACAACAAAAGACAAAAAAAAAA	C	15	WXP6,WXP7,XP3,XP6,DU7	-	-	intergenic_variant	MODIFIER	-	-	-	2	2	1	5
sv_00810	1	51292831	51292923	92	DEL	TTCTTGCAACTGCATTTTTTTATTTATATAATTTTTTTTTTATTTTCCCACTGTACAGCAAGGGGGTCAGGTTATCCTTACATTTTTCCCCCA	T	5	LA4,LA5	-	-	intergenic_variant	MODIFIER	-	-	-	0	0	2	2
sv_00811	1	51563198	51563791	593	DEL	GAAAATGTGGTACAGCTGAGTAGTATTCCATTGTGTATATATACCACATCTTCCAAATCCAATCATCTGTCGATGGACATTTGGGTTGTTTCCACGTCCTGGCTATTGTGAATAGTGCTGCAATGAACATGCGGGTGCATGTGTCTCTTTTAAGTAGAGCTTTGTCCGGATAGATGCCCAAGAGTGGGATTGCAGGGTCGTATGGAAGTTCTATGTATAGATTTCTAAGGTATCTCCAAACTGTTCTCCATAGTGGCTGTACCAGTTTACATTCCCACCAGCAGTGCAGGAGGGTTCCCTTTTCTCCACAGCCCCTCCAGCACTTGTTATTTGTGGATTTATTAATGATGGCCATTCTGACTGGTGTGAGGTGGTATCTCATGGTAGTTCTGATTTGCA…	G	19	WXP5,WXP6,XP2,XP3,XP6,XP7,LW4,LW6,LW7,LA6,LA7,DU7	-	-	intergenic_variant	MODIFIER	-	-	-	2	4	6	12
sv_00812	1	51597531	51597590	59	DEL	AGCACACTGAGCACAGGCCTCAGCAGAAGGCCTCAGCACTTCCTGACTTCTACCATGATG	A	7	WXP6,XP2,XP3,XP6,XP7,LA7,DU3,DU4	-	-	intergenic_variant	MODIFIER	-	-	-	1	4	3	8
sv_00813	1	51828417	51828562	145	DEL	TAGTATTTTCATTTTTTTTTTTTTTTATGGAACGCTTCACGAATTTGCGTGTCATCCTTGCACAGGGGCCATGCTAATCTTCTCTGTATCGTTCCAATTTTTTTTTTTTTTTTTTTTTTTAGTATATGTGCTGCCGAAGCGAGCAC	T	15	WXP1,WXP2,WXP3,WXP4,WXP5,WXP6,WXP7,XP3,XP4,XP6,XP7,LW4,LW5,LW6,LW7,DU7	ENSSSCG00000004280	ENSSSCT00000004730.4	intron_variant,feature_truncation	MODIFIER	RIMS1	protein_coding	INTRON=1/30,STRAND=1	7	4	5	16
sv_00814	1	52085597	52085736	139	DEL	GATTACATTCATGTAAACAGAAAGCAGATATTTATTCATAGTTTAGTGGGATGGTGATTCCAAGAATCACTCCAAATGAGACGTCCATGCGCCTTGACCAGCCTGGTCTAAAAGACATCAGCCACCTTGAGATACTGTAC	G	7	WXP6,XP4,XP5,LW4,LW5	ENSSSCG00000004280	ENSSSCT00000004730.4	intron_variant,feature_truncation	MODIFIER	RIMS1	protein_coding	INTRON=9/30,STRAND=1	1	2	2	5
sv_00815	1	52154961	52155253	292	DEL	AAAAAAAAAGGGGAGTTCCCCTCGTGGCGCAGTGGTTAATGAATCCGACTGGGAACCATGAGGTTGCGGGTTCAGTCCCTGCCCTTGCTCAGTGGGTTAACGATCCGGCGTTGCCATGAGCTGTGGTGTAGGTTGCAGACGCGGCTCGGATCCCGCGTTGCTGTGGCTCTGGCGTAGGCTGGTGGCTACAGCTCCGATTCAACCCCTAGCCTGGGAACCTCCATATGCCGCGGGAGCGGCCCAAGAAATAGCAACAACAACAACAATAACAACAAACAAACAAACAAACAAAC	A	5	WXP6,WXP7,XP4,XP5,XP6,LW4,LW5,LA7	ENSSSCG00000004280	ENSSSCT00000004730.4	intron_variant,feature_truncation	MODIFIER	RIMS1	protein_coding	INTRON=25/30,STRAND=1	2	3	3	8
sv_00816	1	52193191	52193489	298	DEL	TGGAGTGTGCTTTTTTCTTTTTTTTTTTTTTTTTTTTGTCTTTTTGTTGTTGTTGTTGCTATTTCTTGGGCCGCTCCCGTGGCATATGGAGGTTCCCAGGCTAGGGGTTGAATCGGAGCTGTAGCCACCAGCCTACGCCAGAGCCACAGCAACGTGGGATCCGAGCCGCGTCTGCAACCTACACCACAGCTCACGGCAACGCCGGATCGTTAACCCACTGAGCAAGGGCAGGGACCGAACCCGCAACCTCATGGTTCCTAGTCAGATTCGTTAACCACTGCACCACGACGGGAACTCCC	T	17	WXP4,WXP6,XP1,XP5,XP7,LW4,LW5,LA7	ENSSSCG00000004280	ENSSSCT00000004730.4	intron_variant,feature_truncation	MODIFIER	RIMS1	protein_coding	INTRON=26/30,STRAND=1	2	3	3	8
sv_00817	1	52193599	52193895	296	DEL	TTTTCTATTATTTTCTTTTTTTTTTTTTTTTTTTTGTTTGTCTTTTGTTGTTGTTGCTATGTCTTGGGCCGCTCCCGCGGCATATGGAGGTTCCCAGGCTAGGGGTCTAATCGGAGCTGTAGCCACCGGCCCACGCCAGAGCCACAGCAACGCGGGATCCGAGCCGCGTCTGCAACCTACACCACAGCTCACGGCAACGCCGGATCGTTAACCCACTGAGCAAGGGCAGGGACCGAACCCGCAACCTCATGGTTCCTAGTCGGATTCGTTAACCACTGCGCCACGACGGGAACTCCC	T	11	WXP3,WXP4,WXP6,XP4,XP7,LW4,LW5	ENSSSCG00000004280	ENSSSCT00000004730.4	intron_variant,feature_truncation	MODIFIER	RIMS1	protein_coding	INTRON=26/30,STRAND=1	3	2	2	7
sv_00818	1	52252486	52252785	299	DEL	TAAAAAGTACACAGATACGGAGTTCCCGTCGTGGTGCAGTGGTTAACGAATCCGACTAGGAACCATGAGGTTGCGGGTTCGATCCCTGCCCTTGCTCAGTGGGTTAACGATCCGGCGTTGCCGTGAGCTGTGGTGTAGGTCACAGACGCGGCTCGGATCCCGCGTTGCTGTGGCTCTGGCGTAGGCCGGTGGCTACAGCTCCAATTCAACCCCTAGCCTGGGAACCTCCATATGCCGCGGGGAGCGGCCCAAGAAATAGCAACAACAACAAAAGACCAAAAAAAAAAAAAAAAAAAAAAA	T	14	WXP3,WXP5,WXP6,XP1,XP2,XP3,XP4,XP6,XP7,LW4,LW5,LW6,LW7,LA5,LA7,DU4,DU6,DU7	-	-	intergenic_variant	MODIFIER	-	-	-	3	6	9	18
sv_00819	1	52268919	52269222	303	DEL	TTGAAAATATTTTTTTTTTGGTCTTTTTTTTTTGTCTTTGTTGTTGTTGTTGTTGTTGTTGTTGCTATTTCTTGGGCCGCTCCTGCGGCATATGGAGGTTCCCAGGCTAGGGGTTGAATCGGAGCTGTAGCCACCGGCCTACGCCAGAGCCACGGCAACGCGGGATCCGAGCCGCGTCTGCAACCTACACCACAGCTCACGGCAACGCCGGATCGTTAACCCACTGAGCAAGGGCAGGGACCGAACCCGCAACCTCATGGTTCCTAGTCGGATTCATTAACCACTGCGCCACGACGGGAACTCC	T	12	WXP1,WXP3,WXP4,WXP5,WXP6,WXP7,XP1,XP2,XP3,XP4,XP5,XP6,XP7,LW5,LW6,LW7,LA4,LA5,LA6,DU3,DU4,DU5,DU7	-	-	intergenic_variant	MODIFIER	-	-	-	6	7	10	23
sv_00820	1	52270352	52270667	315	DEL	TAAGAGTGTGTTAATGCATCTCCTCAGAAGAGAAAATCATGGACTTGGAGAAGAGACTTGTGGTTGCCTGATGGGAGGGGGAGGGAGTAGGAGGGATCGGGAGCTTGGGCTTATCAGACACAACCTAGAATAGATTTACAAGGAGATCCCGCTGAATAGCATTGAGAACTATGTCTAGATACTCATGTTGCAACAGAAGAAATGGTGGGGGAAAAACTGTAATTGTAATGTATACATGTAAGGATAACCTGACCCCCTTGCTGTACAGTGGGAAAATAAAATAAAATAAAATAAAAAAGAATATGCAAAAAAAAAA	T	13	WXP6,LW6,LW7,LA6,DU3,DU5,DU7	-	-	intergenic_variant	MODIFIER	-	-	-	1	0	6	7
sv_00821	1	52281671	52282204	533	DEL	TAGAATTTCAGGGGCTAAGGACATGGAAACAATCCAAATGTCCATCGACAGAGGATTGGATTCGGAAGATGTGGTATATATACACGATGGAATACTACTCAGCCATTAAAAAGGATGACATAATGCCATTTGCAGCAACATGGATGGAACTAGAGAATCTCATACTGAGTGAAATGAGCCAGAAAGACAAAGACAAATACCATATGATATCACTTATAACTGGAATCTAATATCCAGCACAAATGAACATCTCCTCAGAAAAGAAAATCATGGACTTGGAGAAGAGACTTGTGGTTGCCTGATGGGAGGGGGAGGGAGTGGGAGGGATCGGGAGCTTGGGCTTATCAGACACAACCTAGAATAGATTTACAAGGAGATCCCACTGAATAGCATTGAGAA…	T	19	WXP3,WXP5,WXP6,XP1,XP3,XP4,XP6,XP7,LW4,LW6,LW7,LA5,LA7,DU7	-	-	intergenic_variant	MODIFIER	-	-	-	3	5	6	14
sv_00822	1	52372152	52372933	781	DEL	CTAAAAACCACTAATCTACCCTATGAATTTGCGTTTTCTGGGTATCTCATATACATAAAATCATAGGTCCATAATATGTAGCATTTTGTGTCTGGCTTGTTTTATTCAGCATAAAGTTTTCAAGCTTCATCCATGTTGCATAATGTATTCCATTACTTTTATAACTAAAAATACTCCACTGTTTGGATATAACATTTTTTCGTAAGTTCATTAGTTGTTGAGATTCCACTTTTTGGCTATTATGAATAGTGCTGCTTTGAACATCCTTGTTCAAGTGTGTGCTTGACCACATGTTCACACATTTTAAATTCTCTTGGAAATTGCCCAGTCAAATGGCAACTCTATGTTTAAATGATTAAGGAACTGTCAAACTTTTCCATAGCAATTGCACATTTTACA…	C	15	WXP6,XP3,XP6,LW4,LW6,LW7,LA5,DU7	-	-	intergenic_variant	MODIFIER	-	-	-	1	2	5	8
sv_00823	1	52744515	52744821	306	DEL	ACTTGTCTTTTTTTTTTTTTTAAAGAAATCAATATTCCTTTTATTCGGACTGGAAAATTGACGAAATTTTTTGTTCTTTTTTTTTTTTTTTTTTTTTTTTTTAGTTTGGTTTTAAACAATGCATTTTTTTTTTTTTTCCCACTGTACAGCAAGGGGGTCAGGTCATCCTTAGATGTATACATTGCAGTTACAGTTTTTTCCCCCACCCTTTCTTCTGTTGCGACATGAGTATCTAGACATAGTTCTCAATGCTATTCAGCAGGATCTCCTTATAAATCTATTCTAGGTTGTGTCTGATAAGCCCAAG	A	10	WXP2,WXP7,XP1,XP2,XP3,XP4,XP5,XP6,LW4,LW5,LW6,LA4,LA7,DU7	ENSSSCG00000004281	ENSSSCT00000004731.4	intron_variant,feature_truncation	MODIFIER	KCNQ5	protein_coding	INTRON=1/12,STRAND=1	2	6	6	14
sv_00824	1	52758357	52758626	269	DEL	TTGTTTTTTTGGTTTTTTTTGTCTTTTTTGCTATTTCTTGGGCCACTCCCGTGGCATATGGAGGTTCCCAGGCTAGGGGTCGAATCAGAGCTGTAGCCACCGGCCCACGCCAGGGCCACAGCAACGCAGGATCCGAGCTGCGTCTGCAACCTACACCACAGCTCACGGCAACGCCGGATCGTTAACCCACTGAGCAAGGGCAGGGACTGAACCCACAACCTCATGGTTCCTAGTCGGATTCATTAACCACTGCGCCACGACGGGAACTCC	T	8	WXP6,XP5	ENSSSCG00000004281	ENSSSCT00000004731.4	intron_variant,feature_truncation	MODIFIER	KCNQ5	protein_coding	INTRON=1/12,STRAND=1	1	1	0	2
sv_00825	1	52846463	52846757	294	DEL	TAAAAAGAGATCATATTGGAGTTCCCGTCGTGGCGCAATGGTTAACGAATCCGACTAGGAACCATGAGGTTGCGGGTTCGGTCCTTGCCCTTGCTCAGTGGGTTAATGATCCGGCGTTGCCGTGAGCTGTGGTGTAGGTTGCAGACGTGGCTCGGATCCCACGTTGCTGTGGCTCTGGCGTAGGCCGGTGGCTACAGCTCCGATTAGACCCCTAGCCTGGGAACCTCCATATGCCGCAGAAGCGGCCCAAAGAAATAACAAAAAAAAGACAAAAAAAAAAAAAAAAAAAAAAAAA	T	8	WXP1,WXP2,WXP4,WXP5,WXP7,XP1,XP2,XP3,XP6,LW5,LW6,LW7	ENSSSCG00000004281	ENSSSCT00000004731.4	intron_variant,feature_truncation	MODIFIER	KCNQ5	protein_coding	INTRON=5/12,STRAND=1	5	4	3	12
sv_00826	1	52886823	52886971	148	DEL	TCTCTTTTAGGTAACAGATTTCTACCACTCCCTGTTGTCTTTCCAGGTACCCCAACCACCAGCTCCCCATCTCTTCCAAGCATTACCTGCCTCCTTCTAAAGGCATTTGGGTTCATGACCTCCAGTCTAACCATTTCATGTCCGGTATC	T	12	WXP2,WXP3,WXP5,WXP7,XP2,XP3,XP5,XP6,XP7,LW4,LW5,LW6,LW7,LA5,LA6,DU1	ENSSSCG00000004281	ENSSSCT00000004731.4	intron_variant,feature_truncation	MODIFIER	KCNQ5	protein_coding	INTRON=9/12,STRAND=1	4	5	7	16
sv_00827	1	52914279	52914468	189	DEL	CTATGTGGTTTGCCTGTGAGTGTTTTCAAATCATCACAAATCTCTAAAAAACTTTTCCAATACATTTATTGAAAAAAATCTGCACATATATGAACACAAGCAGTTCAAACCCCTGTTTTTCAAGGGTCAGCTATACTATGGTACATTCACTTGCTCAGGCTGCCTTAGCAAAACACCACCGAGGGTGGCT	C	6	WXP1,WXP2,WXP4,XP3	ENSSSCG00000004281	ENSSSCT00000004731.4	intron_variant,feature_truncation	MODIFIER	KCNQ5	protein_coding	INTRON=10/12,STRAND=1	3	1	0	4
sv_00828	1	53080880	53081176	296	DEL	CAAAAAATTTGACTACAGGAGTTCCCATCGTGGTGCAGTGGTTAACGAATCTGACTAGGAACCATGAGGTTGCGGGTTCAGTCCCTGCCCTTGCTCAGTGGGTTAACAATCCGGCGTTGCCGTGAGCTGTGGTGTAGGTTGCAGATGCGGCTCGGATCCCACGTTGCTGTGGCTCTGGCGTAGGCTGGTGGCTACAGCTCCGATTCAACCCCTGGCCTGGGAACCTCCATATGCCATGGGAGCGGCCCAAGAAATAGCAACAACAACAACAAAACAATAACAAAAAAGACAAAAAAA	C	5	WXP3,WXP6,XP2	-	-	intergenic_variant	MODIFIER	-	-	-	2	1	0	3
sv_00829	1	53155759	53156046	287	DEL	ACTAATTTTTTTTTTTTTTTGTCTTTTGTTGTTGTCGTTGCTGTTGTTGCTATTTCTTGGGCCGCTCCCGCGGCATATGGAGGTTCCCAGGCTAGGGGTTGAATGGGAGCTGTAGCCACCGGCCTACGCCAGAGGCACAGCAACGCAGGATCCGAGCCGCGTCTGCAACCTACACCACAGCTCACGGCAGCGCCGGATCGTTAACCCACTGAGCAAGGGCAGGGACCAAACCCGCAACTTCATGGTTCCTAGTCGGATTCGTCAACCACTGCGCCACGACGGGAACTC	A	11	WXP2,WXP3,WXP5,WXP6,XP1,XP3,XP6	ENSSSCG00000022994	ENSSSCT00000030777.3	intron_variant,feature_truncation	MODIFIER	CYB5R4	protein_coding	INTRON=11/17,STRAND=1	4	3	0	7
sv_00830	1	53167298	53167597	299	DEL	GGGTTATGGGTTTTTCTTTTTTTTTTTTTTTTTTTGTCTTTTTTGTTGTTTTTGTTGTTGCTATTTCTTGGGCCGCTCCTGCGGCATATGGAGGTTCCCAGGCTACGGGTCGAATCGGAGCTCTAGCCACCGGCCTACGCCAGAGCCACAGCAACGCAGGATCCGAGCCGCGTCTGCAACCTACACCACAGCTCACGGCAACGCCGGATCGTTAACCCACTGAGCAAGGGCAGGGACCGAACCCGCAACCTCATGGTTCCTATTCAGATTCGTTAACCACTGCGCCACGACGGGAACTCC	G	14	WXP6,XP3,XP6	ENSSSCG00000022994	ENSSSCT00000030777.3	intron_variant,feature_truncation	MODIFIER	CYB5R4	protein_coding	INTRON=12/17,STRAND=1	1	2	0	3
sv_00831	1	53196795	53197090	295	DEL	CACGCTGGATCCTTCACCCACTGAGTGAGGCCAGGGATCAAACCTGCATCCTCATGGATACTAGTCAGATTTGTTTCTGCTGTGCCACAATGGGAACTCCATAATAGATACTTTCTTATTGTATTTAATTTTTTATTTTCTCATTTAAAATTTTTTTTAATTTTTAAATTTTTAATTAATTTTTATTTATTTATTTTAGGGCCACACCTACAGCATATGGAAGTTCTCAGGCTAGGGGTCAAATTGGAGCTGCAGCTGCTGGCCTACACCACAGCCATAGCA	C	7	WXP6,XP3,XP7,LA6	-	-	intergenic_variant	MODIFIER	-	-	-	1	2	1	4
sv_00832	1	53213471	53214422	951	DEL	GCCTTAATACAAATTAAGGCAATTGCTCTGCACCAGTAGTGTTTATATTCTTCAACATCATGCATGCCCACCCCCCAAAAACACAAACGTCAATTCCACTTAGCAATGTCCTTGATGAAGCAGTAAAATACTCTGAGACAAAATGGGGAGGACACATGAGACATTTCTGCCCTGGACTGAAGATAATTGTTTCAAGGAAAAGCACTTTGAATTGCAAGCTGAGCTGGCTTTTTATTCATAGGGGACCATTTTTACCTGAAAGAACAAGTGTCATATAAACTATGATTTTGCAGATTGTGATATTTGGCAGACTTTTTTTTTTTTTCTAATGAAAACTGGACAAAATAGGCTGTCACTGCCAGGACTGACGTATTTGGCTAATTTTGCCATTTTTGTATT…	G	8	XP3,LW4,LW5,LW6,LW7,LA6,DU7	-	-	intergenic_variant	MODIFIER	-	-	-	0	1	6	7
sv_00833	1	53222635	53222922	287	DEL	CATGTGCTAGTAATCTTTTTTTTTTTTTTTGTCTTTTGTTGTTGTTGCTATTTCTTGGGCTGCTCCCGCGGCATATGGAGGTTCTCAGGCTAGGGGTTGAATCGGAGCTGTAGCCACCGGCCTACGCCAGAGCCACAGCAACGCGGGATCCGAGCCACGTCTGCAACCTACACCACAGCTCACGGCAACGCCGGATCGTTAACCCACTGAGCAAGGGCAGGGATCGAACCTGCAACCTCATGGTTCCTAGTCGGATTCGTTAACCACTGCGCCACGACGGGAACTCCA	C	11	WXP7,XP1,XP2,XP3,XP5,XP7,LW4,LA5,LA6,DU7	-	-	intergenic_variant	MODIFIER	-	-	-	1	5	4	10
sv_00834	1	53275366	53283159	7793	DEL	CTGATATTTGAATTTCTTTTTTTTTTTTTTTTTTAATTTTATTTTTTTATTTTCCCACTGTACAGCAAGGGGGTCAGGTTATCCTTACATGTATACATTACAATTACAGTTTTTCCCCCACCATTTCTTCTGTTGCAACATGAGTATCTAGACATAGTTCTCAATGCTATTCAGCGGGATCTCCTTGTAAATCTATTCTAGGTTGTGTCTGATAAGCCCAAGCTCCCGATCCCTCCCACTCCCTCCCCCTCCCATCAGGCAACCACAAGTCTCTTCTCCAAGTCCATGATTTTCTTTTCTGAGGAGATGTTCATTTGTGCTGGATATTAGATTCCAGTTATAAGTGATATCATATGGTATTTGTCTTTGTCTTTCTGGCTCATTTCACTCAGTATGAGA…	C	5	XP2,XP3,XP4,XP6,LW5	ENSSSCG00000026943	ENSSSCT00000025979.3	intron_variant,feature_truncation	MODIFIER	MRAP2	protein_coding	INTRON=1/3,STRAND=1	0	4	1	5
sv_00835	1	53344120	53345281	1161	DEL	TCCTTCAGCATAATCTTTTTTTTTTTTTTTGGTTTTTTTTTTTTTTTATTTTCCCACTGTACAGCAAGGGGGTCAGGTCATCCTTAGATGTATACATTGCAGTTACAGTTTTTTCCCCCACCCTTTCTTCTGTTGCGACATGAGTATCTAGACATAGTTCTCAATGCTATTCAGCAGGATCTCCTTGTAAATCTATTCTAGGTTGTGTCTGATAAGCCCAAGCTCCCGATCCCTCCCACTCCCTCCCCCTCCCATCAGGCAACCACAAGTCTCTTCTCCAAGTCCATGATTTTCTTTTCTGAGGAGATGTTCATTTGTGCTGGATATTAGATTCCAGTTATAAGTGATATCATATGGTATTTGTCTTTGTCTTTCTGGCTCATTTCACTCAGTATGAGA…	T	8	XP1,XP2,XP3,XP4,XP6,LW4,LW5	ENSSSCG00000004289	ENSSSCT00000004742.4	intron_variant,feature_truncation	MODIFIER	CEP162	protein_coding	INTRON=26/26,STRAND=-1	0	5	2	7
sv_00836	1	53365205	53365505	300	DEL	TAAAAAATTATACATTATTGGAGTTCCCGTTGTGGCTCAGTGGTTAACGAATCCGACTAGGAACCATGAGGTTGCGGGTTCGGTCCCTGGCCTTGCTCAGTGGGTTAACGATCCGGCGTTGCCGTGAGCTGTGGTGAAGGCTGCAGATGCGGCTCGGATCCCGCGTTGCTGTGGCTCTGGCGTAGGCCGGTGGCTACAGCTCCGATTCAACCCCTAGCCTGGGAACCTCCATATGCCGCGGGAGCGGCCCAAGAAATAGCAACAACAACAAGAACAACAACAAAAAAAGACCAAAAAAAAA	T	9	XP3,XP6,XP7	ENSSSCG00000004289	ENSSSCT00000004742.4	intron_variant,feature_truncation	MODIFIER	CEP162	protein_coding	INTRON=23/26,STRAND=-1	0	3	0	3
sv_00837	1	53370968	53371020	52	DEL	CAGGGAAGGTAATTAGAGGAAAGTCATGAAGTGGTAATGGTGAAACTGGGCCT	C	15	WXP6,WXP7,XP6,LW6,LW7,LA4,LA5,LA7	ENSSSCG00000004289	ENSSSCT00000004742.4	intron_variant,feature_truncation	MODIFIER	CEP162	protein_coding	INTRON=22/26,STRAND=-1	2	1	5	8
sv_00838	1	53380201	53380503	302	DEL	CAAAAAAAAAAAAAAAAAAAAGGAGTTCCCGTCGTGGCGCAGTGGTTAACGAATCCGACTAGGAACCATGAGGTCGCGGGTTCGGTCCCTGCCCTTGCTCAGTGGGTTAACGGTCCGGCGTTGCCGTGAGTTGTGGTGTAGGTCGCAGACGCGGCTCGGATCCCGCGTTGCTGTGGCACTGGCGTAGGCCGGTGGCTACAGCTCCGATCCAATCCCTAGCCTGGGAACCTCCATATGCCGCGGAAGCGGCCCAAGAGATAGCAACAACAACAACAACAAAAGACAAAAAGACAAAAAAAAAAA	C	9	WXP5,WXP7	ENSSSCG00000004289	ENSSSCT00000004742.4	intron_variant,feature_truncation	MODIFIER	CEP162	protein_coding	INTRON=18/26,STRAND=-1	2	0	0	2
sv_00839	1	53599235	53599528	293	DEL	ACTTGTTTTTTTTTTTTTTTTTTTGTCTTTTGTTGTTGTTGTTGTTGCTATTTCTTGAGCCGCTCCCGCGGCATATGGAGGTTCCCAGTCTAGGGGTTGAATCGGAGCTGTAGCCACCAGCCTACGCCAGAGCCACAGCAACTCGGGATCCGAGCCGCGTCTGCAACCTACACCACAGCTCACGGCAACGCTGGATCGTTAACCCACTGAGCAAGGGCAGGGATCGAACCCGCAACCTCATGGTTCCTAGTCGGATTCGTTAACCACTGCGCCACGACGGGAACTCCCAGTGGG	A	10	WXP2,WXP3,WXP4,WXP5,WXP7,XP1,XP2,XP3,XP5,XP6,XP7,LA4,LA5,DU7	-	-	intergenic_variant	MODIFIER	-	-	-	5	6	3	14
sv_00840	1	53643614	53643709	95	DEL	TAAAAAAAAAAAAGCCGCGGGAGCGGCCCAAGAAATAGCAACAACAACAACAACAACAAAGACAAAAGACAAAAAAAAAAAAA	T	7	WXP1,WXP2,LW7	-	-	intergenic_variant	MODIFIER	-	-	-	2	0	1	3
sv_00841	1	53729796	53730100	304	DEL	ATGATTTTTATTTTATTTTATTTTATTTATTTATTTATTTATTTATTTATTTATTTATTTTTTGGTCTTTTTGCTATTTCTTGGGCCGCTCCCGCGGCATATGGAGGTTCCCAGGCTAGGGGTCGAATTGGAGCTGTAGCTGCCAGAGCCACAGCAACGCAGGATCCGAGCCGAGTCTGCAACCTACACCACAGCTCACGGCAACGCCGGATATCGTTAACCCACTGAGCAAGGGCAGGGACCGAACCCGCAACCTCATGGTTCCTAGTCGGATTCGTTAACCACTGCGCCACGACGGGAACTCC	A	8	WXP4,WXP7,XP3,XP6,DU7	-	-	intergenic_variant	MODIFIER	-	-	-	2	2	1	5
sv_00842	1	53762059	53762339	280	DEL	TCAAAGAGCCTTTTCTTTTTTTTTTTTTTTTTGTCTTTTTGCTATTTCTTAGGCCGCTCCCGCGGCATATGGAGGTTCCCAGGCTAGGGGTCTAATCGGAGCTGTAGCTGCCAGCCTATGCCAGAGCCACAGCAACGCGGGATCCAAGCCGCGTCTGCAACCTACACCACAGCTCACGGCAACGCTGGATCGTTAACCCACTGAGCAAGGGCAGGGATCGAACCCGCAACCTCATGGTTCCTAGTCGGATTCGTTAACCACTGCGCCACGACGGGAACTCC	T	15	WXP5,XP1,XP3,XP5,XP6,XP7,LW4,LW5,LW6,LW7,LA6,LA7,DU7	-	-	intergenic_variant	MODIFIER	-	-	-	1	5	7	13
sv_00843	1	53854231	53854292	61	DUP:TANDEM	AGGATTTTTTTTCTCTTGCGCATTACCTAGGAGTATAGACAAACACACAGACCTTTGTCCAC	AGGATTTTTTTTCTCTTGCGCATTACCTAGGAGTATAGACAAACACACAGACCTTTGTCCACTGGATTTTTTTTCTCTTGCGCATTACCTAGGAGTATAGACAAACACACAGACCTTTGTCCAC	7	LW6,LW7	ENSSSCG00000004290	ENSSSCT00000004744.4	intron_variant	MODIFIER	TBX18	protein_coding	INTRON=4/7,STRAND=-1	0	0	2	2
sv_00844	1	53891110	53891234	124	DEL	TACTCATGTTGCAACAGAACAAAGGGTGGGGGAAAAAATGTAATTGTAATGTATACATGTAAGGATAACCTGACCCCCTTGCTGTACAGTGGGAAAATAAAAAAAAAAAAAAAAAAAAAAAAAAA	T	20	XP7,LW5,LW6,LW7,LA4,LA5,DU7	-	-	intergenic_variant	MODIFIER	-	-	-	0	1	6	7
sv_00845	1	53930870	53931008	138	DUP:TANDEM	GATTTGGAGAAAGGGACATTGGGAAACACAAGAGAAACCTGGATCCCAGTTCAACTCACAGAGTCTAATGACATCAATTATAGAGAAGCAAATGCTGAGAAACAAGAGTTTCTGGAGGAGTGCACTCAGTGGGTTCAAC	GATTTGGAGAAAGGGACATTGGGAAACACAAGAGAAACCTGGATCCCAGTTCAACTCACAGAGTCTAATGACATCAATTATAGAGAAGCAAATGCTGAGAAACAAGAGTTTCTGGAGGAGTGCACTCAGTGGGTTCAACAAATTTTACCAATTTGGAGAAAGGGACATTGGGAAACACAAGAGAAACCTGGATCCCAGTTCAACTCACAGAGTCTAATGACATCAATTATAGAGAAGCAAATGCTGAGAAACAAGAGTTTCTGGAGGAGTGCACTCAGTGGGTTCAAC	5	WXP2,WXP3	-	-	intergenic_variant	MODIFIER	-	-	-	2	0	0	2
sv_00846	1	54287251	54287542	291	DEL	AAAAAGAATGGATATATGGGAGTTCCCGTCGTGGCGCAGTGGTTAACGAATCCGACTAGGAACCATGAGGTTGCGGGTTCAGTCCCTACCCTTGCTCAGTGGGTTAACGATCCGGCGTTGCCGTGAGCTGTGGTATAGGTTGCAGACGCGGCTCGGATCCCGTGTTTCTGTGGCTCTGGCGTAGGCCGGTGGCTACAGCTCCGATTCAACCCCTAGCCTGGGAACCTCCATATGCCGCGGGAGCGCCCAAGAAATAGCAACAACAACAACAACAACAACAACAAAAAAGACG	A	6	WXP7,XP5,LW4,LW5	-	-	intergenic_variant	MODIFIER	-	-	-	1	1	2	4
sv_00847	1	54343457	54343588	131	DUP:TANDEM	AAATTAGAATGACCTCTCAATGCTAAAAATGAGGGACAGGGAAGGAGTCATAGGCAGATGACTTTAAACCCAGTTACTTCCTCCTGTCTTTTGCTGGTCAAGCTGAAACTGAGCTCTGTGGGGCTCCTGGGC	AAATTAGAATGACCTCTCAATGCTAAAAATGAGGGACAGGGAAGGAGTCATAGGCAGATGACTTTAAACCCAGTTACTTCCTCCTGTCTTTTGCTGGTCAAGCTGAAACTGAGCTCTGTGGGGCTCCTGGGCAATTAGAATGACCTCTCAATGCTAAAAATGAGGGACAGGGAAGGAGTCATAGGCAGATGACTTTAAACCCAGTTACTTCCTCCTGTCTTTTGCTGGTCAAGCTGAAACTGAGCTCTGTGGGGCTCCTGGGC	14	WXP5,XP1,XP3,XP6,XP7,LW4,LW5,LW7,LA6,DU3,DU6,DU7	-	-	intergenic_variant	MODIFIER	-	-	-	1	4	7	12
sv_00848	1	54355802	54356097	295	DEL	TAAGAAAACTATAGACCAGGGGAGTTCCCGTCGTGGTGCAGTGGTTAGCGAATCCGACTAGGAACCATGAGGTTGCGGGTTCGGTCCCTGCCCTTGCTCAGTGGGTTAACAATCCGGCGTTGCCGTGAGCTGTGGTGTAGGTAGCAGACGCGGCTCGGATCCCGCGTTGCTGTGGCTCTGGTGTAGGCCAGTGGCTATGGCTCCGATTCGACCCCTAGCCTGGGAACCTCCATATGCTGCAGGGGCAGCCCAAGAAATAGCAAAAAAGACAAAAAAAAAAAAAAAAAAAAAAAAAA	T	5	DU5,DU6	-	-	intergenic_variant	MODIFIER	-	-	-	0	0	2	2
sv_00849	1	54395661	54395733	72	DUP:TANDEM	ATGTTATCACCTATAAAAGGGGAATGATAACATCTACCCCTTAACAGTTAAGGACCCTACCATGTAACCTGAG	ATGTTATCACCTATAAAAGGGGAATGATAACATCTACCCCTTAACAGTTAAGGACCCTACCATGTAACCTGAGTGTTATCACCTATAAAAGGGGAATGATAACATCTACCCCTTAACAGTTAAGGACCCTACCATGTAACCTGAG	7	LA7,DU2,DU4,DU6,DU7	-	-	intergenic_variant	MODIFIER	-	-	-	0	0	5	5
sv_00850	1	54395661	54395661	72	INS	A	ATGTTATCACCTATAAAAGGGGAATGATAACATCCACCCCTTAACAGTTAAGGACCCTACCATGTAACCTGAG	7	WXP3,WXP7,XP2,LW4,DU5	-	-	intergenic_variant	MODIFIER	-	-	-	2	1	2	5
sv_00851	1	54413003	54413255	252	DEL	TCATTGCATGTGGGTGGTTTCGTGTTCCTGGAACGAGGGCCCCTGGTCTGGCAGGAAAAGTGAAGTGGATGAGGGAGGGGCTCTGGCAGGCAGCGTGGGGCAGGGGGGTCAGGACTGGGATTTCAGCAGGAAGTGGGGCGCCTTTGCAGAGAGACAGCAGGGCCAGGAGCAGTGAGTGGGTCAGGTGTTTGGGGAAGTGCATTCCAGTGGCCCGTGGTGAGTGCGCAGGAGCTGTGTGCGCCTCATGACCCAG	T	7	LW7,LA6,LA7	ENSSSCG00000004291	ENSSSCT00000034230.3	intron_variant,feature_truncation	MODIFIER	NT5E	protein_coding	INTRON=1/8,STRAND=1	0	0	3	3
sv_00852	1	54474625	54474679	54	DEL	ATAGGTCACAGACCTATACCTATGGCTCAGATCCTGCATTGCAGTGGCTATGGTG	A	8	LW6,LW7	ENSSSCG00000004293	ENSSSCT00000004747.4	intron_variant,feature_truncation	MODIFIER	SNX14	protein_coding	INTRON=18/26,STRAND=-1	0	0	2	2
sv_00853	1	54485431	54485720	289	DEL	CAAAAATATGGAGTTCCCGTCGTGGCGCAGTGGTTAACGAATCCGACTAGGAACCATGAGGTTGCGGGTTCGGTCCCTGCCCTTGCTCAGTGGGTTAACGATCCGGCGTTGCCGTGAGCTGTGGTGGAGGTTGCAGACGCGGCTCGGATCCTGCGTTGCTGTGGCTCTGGCGTAGGCCGGTGGCTACAGCTCCAATTCGGCCCTAGCCTGGGAACCTCCATATGCCACGGGAGCGGCCCAAGAAATAGCAACAATAACAACAACAAAAGACAAAAGACAAAAAAAAAAAA	C	10	WXP7,XP1,XP5,XP6,XP7,LW5,LA5,LA7,DU3,DU4,DU6	ENSSSCG00000004293	ENSSSCT00000004747.4	intron_variant,feature_truncation	MODIFIER	SNX14	protein_coding	INTRON=16/26,STRAND=-1	1	4	6	11
sv_00854	1	54485439	54488519	3080	DUP:TANDEM	TGGAGTTCCCGTCGTGGCGCAGTGGTTAACGAATCCGACTAGGAACCATGAGGTTGCGGGTTCGGTCCCTGCCCTTGCTCAGTGGGTTAACGATCCGGCGTTGCCGTGAGCTGTGGTGGAGGTTGCAGACGCGGCTCGGATCCTGCGTTGCTGTGGCTCTGGCGTAGGCCGGTGGCTACAGCTCCAATTCGGCCCTAGCCTGGGAACCTCCATATGCCACGGGAGCGGCCCAAGAAATAGCAACAATAACAACAACAAAAGACAAAAGACAAAAAAAAAAAAAAAAATAGCCAGAAAACAACAAAATGGCAATAAATACACACCTATCAATAACTACTTTAAGTGTAAATAAACTCTACAATTAAAGACAGAGAGGTTGAACAAATTAAAAAAATAAGA…	TGGAGTTCCCGTCGTGGCGCAGTGGTTAACGAATCCGACTAGGAACCATGAGGTTGCGGGTTCGGTCCCTGCCCTTGCTCAGTGGGTTAACGATCCGGCGTTGCCGTGAGCTGTGGTGGAGGTTGCAGACGCGGCTCGGATCCTGCGTTGCTGTGGCTCTGGCGTAGGCCGGTGGCTACAGCTCCAATTCGGCCCTAGCCTGGGAACCTCCATATGCCACGGGAGCGGCCCAAGAAATAGCAACAATAACAACAACAAAAGACAAAAGACAAAAAAAAAAAAAAAAATAGCCAGAAAACAACAAAATGGCAATAAATACACACCTATCAATAACTACTTTAAGTGTAAATAAACTCTACAATTAAAGACAGAGAGGTTGAACAAATTAAAAAAATAAGA…	8	XP2,XP3,LW4,DU5	ENSSSCG00000004293	ENSSSCT00000004747.4	coding_sequence_variant,intron_variant	MODIFIER	SNX14	protein_coding	EXON=15-16/27,INTRON=14-16/26,STRAND=-1	0	2	2	4
sv_00855	1	54492466	54506557	14091	DEL	ATTCACTAGAAGCAGCCAACAGCAGAATACAGGAGGCAGAAGAACGAATAAGCGAGGTGGAGGACAGATTAGTAGAAATTGCAGATGCAGAACAGAAAAGAGAAAAAAGATTGAAAACAAATGAAGAGAGTCTCAGAGAACTCTGGGACAACGTAAAACGCAACAACATCTGTATTATAGGGGGGTGCCAGAAGGAGAAGAGAGAGAGAAAGGGACAGAAAAAATATTCCAAGAGATAATAGCTGAAAATGTCCCTAACATGGGAAGGGAACCACTCACTCAAATCCAGGAAGCACAATGAGTACCATATAAAATAAACCCAAGGAGGAATACACCGAGACACATGTTAATCAAACTAACCAAAATTTAAGACAAAGAGAAAATCCTGAAAGCAGCTAG…	A	18	WXP2,WXP5,WXP7,XP1,XP2,XP3,XP4,XP5,XP6,XP7,LW4,LA4,LA7,DU2,DU3	ENSSSCG00000004293	ENSSSCT00000004747.4	coding_sequence_variant,intron_variant,feature_truncation	MODIFIER	SNX14	protein_coding	EXON=11-14/27,INTRON=10-14/26,STRAND=-1	3	7	5	15
sv_00856	1	54525586	54526088	502	DEL	ACTGAACACTCCATCTTTTTTTTTTTTTTTTTTTTTTTCCAATCACTGCTTGCTTGCTTGCTTTCCTCCCCACCCCCACCCCCCCCGTCTTTATAGGGCCTCAATTGCTGGTATATGGAGGTTCCCAGGCTAGGGGTTGAAGCAGAACTGTAGCTGCCAGACTACACCACAGCCACAGCAACGCAGGATCCGAGCTCCATCTGTGACCTGCACGGCAGTTCACTGTGACGCCGGATTCTGTCTTTTGTTGTTGTTGTTGTTGTTGCTATTTCTTGGCCGCTCCCGCGGCATATGGAGGTTCCCAGGCTAGGGGTTGAATCGGAGCTGTAGCCACCGGCCTACGCCAGGGCCACAGCAACGCGGGATCCGAGCCGCGTCTGCAACCTACACCACAGCTCA…	A	11	LA6,LA7,DU3,DU4,DU5,DU6	ENSSSCG00000004293	ENSSSCT00000004747.4	intron_variant,feature_truncation	MODIFIER	SNX14	protein_coding	INTRON=4/26,STRAND=-1	0	0	6	6
sv_00857	1	54572586	54572736	150	DEL	CTTCCCTGATTATGAAATAATAGAAGGTTCCCCCACATAGAGTAATAAACAGAAAACTGACTTGAGATATAGTTAAGTTCAGTGATTACTGTTCTTTTTTTTTTTTTTTCTTTTTGCTATTTCTTTGGGCCACTCCCACAGCATATGGAGG	C	8	LW6,LA4	ENSSSCG00000004294	ENSSSCT00000004748.4	intron_variant,feature_truncation	MODIFIER	SYNCRIP	protein_coding	INTRON=11/11,STRAND=-1	0	0	2	2
sv_00858	1	54677089	54683811	6722	DEL	AAAGAACTGGGAGGGGGGCTGGGCACCGAGACCTCGCCGAAGAAGGTTAGTCCCCGAGAAAGGGCCCGGGGGTGGGGCGCCGCCTGGGTGGGGGCTGGGCACCGAGACCTCGACTCCAGAGATTAGTCCCCGGGCTAGGGGGGCGGGGCAGAGCGGAAACTGCTTGGGAGGTCTAGAAACCAGTTGACGGGGCAGAGACTGCCTGGGAGACTAGAAAACAAAGCTGTCGCAGAGGAAGGGAGCAATACTCCAGGAGTGGGGAAGGGGAAAGCCACATCAGAGGGAACCTGGGAGAAGAGCCTGGTCTGCGCCCGTGCTGGGGAGGGGAGAGAAGAAGGGATGGGTCCCCATAGAATACCCCCCACCCACAGCAAGCTTACAGGCCCGCTTGCTAGCTGA…	A	32	XP3,XP5,XP6,LW4,LW5	-	-	intergenic_variant	MODIFIER	-	-	-	0	3	2	5
sv_00859	1	54752246	54752528	282	DEL	AGTATTTATCTTTTTTTTTTTTTGCTTTTTGTCTTTTGTTGTTGTTGTTGTTGTTGCTATTTCTTGGGCCGCTCCCGCGGCATATGGAGGTTCCCAGGCTAGGGGTCCAATCGGAGCTACGCCAGAGCCACAGCAACGCGGGATCCAAACCGCGTCTGCAACCTACACCACAGCTCACGGCAACGCCGGATCGTTAACTCACTGAGCAAGGGCAGGGACCGAACCTGCAACCTCATGGTTCCTAGTCGGATTCGTTAACCACTGCGCCACGACGGGAACTCCC	A	5	XP2,XP3,XP6	-	-	intergenic_variant	MODIFIER	-	-	-	0	3	0	3
sv_00860	1	54756342	54763628	7286	DEL	ATAGTTTTGTTTTCTTTTTTTTTTTTATTATTATTTTCCCACTGTACAGCAAGGGGGTCAGGTCATCCTTAGATGTATACATTGCAGTTACAGTTTTTTTCCCCCACCCTTTCTTCTGTTGCGACATGAGTATCTAGACATAGTTCTCAATGCTATTCAGCAGGATCTCCTTATAAATCTATTCTAGGTTGTGTCTGATAAGCCCAAGCTCCCGATCCCTCCCACTCCCTCCCCCTCCCATCAGGCAACCACAAGTCTCTTCTCCAAGTCCATGATTTTCTCTTCTGAGGAGATGTTCATTTGTGCTGGATATTAGATTCCAGTTATAAGTGATATCATATGGTATTTGTCTTTGTCTTTCTGGCTCATTTCACTCAGTATGAGATTCTCTAGCTCCAT…	A	3	XP2,XP3,XP5,XP6	-	-	intergenic_variant	MODIFIER	-	-	-	0	4	0	4
sv_00861	1	54787056	54787530	474	DEL	TTTTCTCCTTTTTATTTTATTTTATTTTATTTTTTTTATTATTTTCCCACTGTACAGCAAGGGGGTCAGGTCATCCTTAGATGTATACATTGCAGTTACAGTTTTTTCCCCCACCCTTTCTTCTGTTGCGACATGAGTATCTAGACATAGTTCTCAATGCTATTCAGCAGGATCTCCTTATAAATCTATTCTAGGTTGTGTCTGATAAGCCCAAGCTCCCGATCCCTCCCACTCCCTCCCCCTCCCATCAGGCAACCACAAGTCTCTTCTCCAAGTCCATGATTTTCTTTTCTGAGGAGATGTTCATTTGTGCTGGCTATTAGATTCCAGTTATAAGTGATATCATATGGTATTTGTCTTTGTCTTTCTGGCTCATTTCACTCAGTATGAGATTCTCTA…	T	10	LA6,LA7,DU1,DU4,DU5,DU6	-	-	intergenic_variant	MODIFIER	-	-	-	0	0	6	6
sv_00862	1	54829529	54829828	299	DEL	TATCTTATAATAAGGGAGTTCCCGTCGTGGCGCAGTGGTTAACGAATCCGACTAGGAACCATGAGGTTGCGGGTTCGGTCCCTGTCCTTGCTCAGTGGGTTAACGATCTGGCGTTGCCGTGAGCTGTGGTGTAGGTTGCAGACGCGGCTCGGATCACGCGTTGCTGTGGCTCTGGTGTAGGCCGGTGGCTACAGCTCCGATTCAACCCCTAGCCTGGGAACCTCCATATGCCGAGGGAGCGGCCCAAGAAATAGCAACAACAACAACAAAAAGACAAAAGACCAAAAAAAAAAAAAAAAA	T	18	WXP4,WXP6,XP1,XP3,XP4,XP5,LW4,LA5,LA6	-	-	intergenic_variant	MODIFIER	-	-	-	2	4	3	9
sv_00863	1	54841063	54841357	294	DEL	TGCTTGAGCTATTCTTTTTTTTTTTTTTTTTTTTTTTTTTTTTTTTTTTTTTTTTTTCTATTTCTTTGGCCGCTCCGCGGCATATGGAGGTTCCCAGGCTAGGGTCTAATCGGAGCTGTAGTCCCCGGCCTACACCAGAGCCACAGCAACGCAGGATCCGAGCCGCGTCTGCAACCTACACCACAGCTCACGGCAACGCCAGATCATTAACCCACTGAGCAAGGGCAGGACCGAACCCGCAACCTCATGGTTCCTAGTCGGATTCGTTAACCACTGCGCCACGACGGGAACTCCC	T	20	WXP2,WXP3,WXP4,WXP5,WXP6,XP1,XP2,XP3,XP4,XP5,XP6,XP7,LW4,LW5,LW6,LW7,LA4,LA6,LA7,DU1,DU3,DU4,DU5	-	-	intergenic_variant	MODIFIER	-	-	-	5	7	11	23
sv_00864	1	54985597	54993653	8056	DEL	TAGCAATGAATTTCTTTTTTTTTTTTTCCTTTTTTTTTTTTTTTTATTTTATTTTCCCACTGTACAGCAAGGGGGTCAGGTTATCCTTACATGTATACATTACAATTACAGTTTTTCCCCCACCATTTCTTCTGTTGCAACATGAGTATCTAGACATAGTTCTCAATGCTATTCAGCGGGATCTCCTTGTAAATCTATTCTACGTTGTGACTGATAAGCCCAAGCTCCCGATCCCTCCCACTCCCTCCCCCTCCCATCAGGCAACCACAAGTCTCTTCTCCAAGTCCATGATTGATTTTCTTTTCTGAGGAGATGTTCATTTGTGCTGGATATTAGATTCCAGTTATAAGTGATGTCATATGGTATTTGTCTTTGTCTTTCTGGCTCATTTCACTCAGG…	T	7	XP4,LW4,LW5	ENSSSCG00000051082	ENSSSCT00000081072.1	transcript_ablation	HIGH	-	processed_pseudogene	STRAND=-1	0	1	2	3
sv_00865	1	55115371	55115662	291	DEL	ATATATCTCTAATTTTATTTTATTTTATTTTTTTTATTTTTTGTCTTTTTGCTATTTCTTTGGGCCACTTCCGCAGCATATGGAGGTTCCCAGGCTAGGGGTCAAATCGGAGCTGTAGCCACCGGCCTACACCAGAGCCACAGCAACGTGGGATCCGAGCCGCGTCTGCAACCTACACCACAGCTCACGGCAACGCCAGATCCTTAACCCACTGAGCAAGGGCAGGGACTGAACCCGCAACCTCATGGTTCCTAGTTGGATTCGTTAACCACTGCGCCACGACGGGAACTCC	A	9	LW7,LA5	ENSSSCG00000041259	ENSSSCT00000066631.1	intron_variant,non_coding_transcript_variant,feature_truncation	MODIFIER	-	lncRNA	INTRON=2/2,STRAND=-1	0	0	2	2
sv_00866	1	55156894	55156969	75	DEL	TAACCACTTAGCCGTGAGAGGAACTCCCTCCTTTAGTATTTTATTACCATTTTTTTTCCATTACAACCCTCACTGC	T	5	LW6,LW7,LA4,LA6,LA7	ENSSSCG00000041259	ENSSSCT00000066631.1	intron_variant,non_coding_transcript_variant,feature_truncation	MODIFIER	-	lncRNA	INTRON=2/2,STRAND=-1	0	0	5	5
sv_00867	1	55267768	55268059	291	DEL	CCCAAATGGCAACTCTTACATGAAGTTCATAGGTGCAGTATGAGAGCCACAAGCTGACAAGACCAGGGTTATCATGATGCCCTCAACAAACACAAGAACAAGCTTCCAAGAGCAGTTGCTTTCCTCTCTCTACCTCCCATCCTTCCCCTCAGAATACAGAACTAGAACACAGGAGCTTGGGATTTGGCATGCCATTTCTAAAACGTGGTGGACATAAAATTCTCATCTTATTAAACATATTTGGGGCTCTTTCTTTCGTATCAGGTAAATATAAACCCTTTTCTCTCCCCCT	C	7	WXP4,XP1,XP3,XP4,XP6,DU7	ENSSSCG00000043035	ENSSSCT00000070184.1	non_coding_transcript_exon_variant,feature_truncation	MODIFIER	-	lncRNA	EXON=1/2,STRAND=-1	1	4	1	6
sv_00868	1	55290546	55290836	290	DEL	GAAAAAGAGGAGTTCCCGTCGTGGCGCAGTGGTTAACGAATCCGACTAGGAACCATGAGGTTGCGGGTTCGGTCCCTGCCTTGCTCAGTGGTTAACGATCCGGCGTTGCGTGAGCTGTGGTGTAGGTTGCAGACGCGGCTCGGATCCTGCGTGCTGTGGCTCTGGCGTAGGCGGTGGCTACAGCTCCGATTCAACCCCTAGCCTGGAACCTCCATATGCCGGGAGCGGCCAAGAAATAGCAACAACAACAACAACAAAAAAAAAAAACAAAAAAAAAAAAAAAAAAAAAAA	G	12	WXP4,WXP5,WXP6,WXP7,XP1,XP3,XP4,XP5,XP6,LW1,LW2,LW3,LW5,LW6,LA1,DU1,DU2,DU5,DU7	-	-	intergenic_variant	MODIFIER	-	-	-	4	5	10	19
sv_00869	1	55362677	55362751	74	DEL	TTTCCCTGTCCATAAGGGGTTTGTCTTTTTTTTTTTTTTTTTTTTTTTTTTGGCCTTACGCACAGCATGCAGAAG	T	11	WXP2,WXP5,XP2,XP5,LA5	-	-	intergenic_variant	MODIFIER	-	-	-	2	2	1	5
sv_00870	1	55376045	55376354	309	DEL	TAAAAACGCATGGGTAGGAGTTCCCGTCGTGGTGCAGTGGTTAACGAATCCGACTAGGAACCATGAGGTTGCGGGTTCGGTCCCTGCCCTTGCTCAGTGGGTTAACGATCCGGCGTTGCCGTGAGCTGTGGTGTAGGTTGCAGATGCGGCTCGAATCCCGCGTTGCTGTGGCTCTGGCGTAGGCCGGTGGCTACAGCTCCGATTCGACCCCTAGCCTGGGAACCTCCATATGCCGCAGGAGCGGCCCAAGAAATAGCAACAACAACAACAACAACAAAGACAAAAGACAAAAAAAAAAAAAAAAAAAAAA	T	12	WXP1,WXP3,WXP4,WXP5,WXP6,WXP7,XP1,XP2,XP3,XP4,XP5,XP6,LW4,LW5,DU7	-	-	intergenic_variant	MODIFIER	-	-	-	6	6	3	15
sv_00871	1	55534041	55535184	1143	DEL	AGTGCAGTAAGTGGGGCTGTCAATCAGCCGCACTCCTCCATGCAGATGCTCTTGAAGGACTTCTGAGCAGCACCTCCCCGGCCTCCACGGAGAAGAAATGGCATATGTGTTCTAAGAAATAAATACAAGAATATTTGTAACGCAGTGTTTATAATAACCCCACACTGGAAACAACTCAGATGTCCATCCATAGGAAGATGGATGAATACACAGTGTCAGAAGCATAAGTGGAGTGCTATTCAGCCATGAATGGACTACAGCTACCCGGCATCCACAAGGGTGCATTTCACAGACAATGTTAGGTCAAAAAAAGAAAATCACAGAGAAATTATGGAATACGGTATTTCCATTTATCAAAATCAAGCATAAGTAAAATTAAATGATATGTTCTTGATGATA…	A	10	XP2,XP5	-	-	intergenic_variant	MODIFIER	-	-	-	0	2	0	2
sv_00872	1	55713922	55714001	79	DEL	ACAGTGCATATTTAAAATATTACAACATAATGCTCAACAGCCAATCAGAAAAATCATATCACGGAGTTCCCATCGTGGCG	A	23	WXP1,WXP4,WXP5,WXP6,WXP7,XP1,XP2,XP3,XP4,XP5,XP6,LW4,LW6,LA4,LA5	ENSSSCG00000035281	ENSSSCT00000065061.2	downstream_gene_variant	MODIFIER	ZNF292	protein_coding	DISTANCE=2248,STRAND=1	5	6	4	15
sv_00873	1	55900251	55900542	291	DEL	TACAACTAACTGCTGAATTTTTTCTTTTTCTTTTTTTTTTTGGTCTTTTTTTGTCCTTTTAGGGCTGTACCCGTGGCATATGGAGGTTCCCAGGCTAGGGATCTAATCTGAGCTGTAGCTGTTGGCCTACGCTAGAGCCACAGCAACGCCAGATCCGAGCTGCATCTGCAATTTACACGACAGCTCACAGCAATGCCAGATCCTTAACCCACTGAGCAAGGGCAGGGATCGAACCCAAAACCTCATGGTTCCCAGTCAGATTTGTTAACCACTGTGCCACGACGGGAACTCC	T	21	WXP1,WXP2,WXP4,WXP5,WXP6,WXP7,XP1,XP2,XP3,XP4,XP6,XP7,LW4,LW5,DU7	ENSSSCG00000004304	ENSSSCT00000004759.4	downstream_gene_variant	MODIFIER	SLC35A1	protein_coding	DISTANCE=4482,STRAND=1	6	6	3	15
sv_00874	1	55961781	55962062	281	DEL	TCAAAACTCCCCATTTTCTTTTTTTTTTTTTTTTTTTGTCTTTTTGCTATTTCTTGGCCGCTCCGCGGCATATGGAGGTTCCCAGGCTAGGGTCTAATCGGAGCTGTAGCTGCCAGCCTATGCCAGAGCCACAGCAACGCGGGATCCGAGCCGTGTCTGCGACCTACACCACAGCTCACGGCAACGCCGGATCGTTAACCCACTGAGCACGGGCAGGGACCGAACCCGCAACCTCATGGTTCCTAGTCGGATTCGTTAACCACTGCGCCACGACGGGAACTC	T	19	WXP1,WXP2,WXP3,WXP4,WXP5,WXP6,WXP7,XP1,XP2,XP3,XP4,XP5,XP6,LW1,LW2,LW4,LW5,LW6,LW7,LA1,LA2,LA3,LA5,LA6,LA7,DU1,DU3,DU4,DU5,DU6,DU7	ENSSSCG00000004303	ENSSSCT00000004757.4	intron_variant,feature_truncation	MODIFIER	RARS2	protein_coding	INTRON=2/18,STRAND=-1	7	6	18	31
sv_00875	1	55968820	55968820	95	INS	C	CCACACCACACAGCAGTGCCCTAAGCCATAAGCAGTGACAAAGCTGGATACTTAACTACTATGCTACAAGGAACTCCACTAAATCTATTGTTTTGT	6	LW4,LW5	ENSSSCG00000004303	ENSSSCT00000004757.4	intron_variant,feature_elongation	MODIFIER	RARS2	protein_coding	INTRON=1/18,STRAND=-1	0	0	2	2
sv_00876	1	56139057	56142241	3184	DEL	ATAAGAGGTAGGTGCCATATCATCCCATTTTACAGATGAAGAAGCAATTCTAGAAAATTAAGAATTTCTCCATCTTCAACATGGCTAGTAAGCAGTGGACCTAGCTCTAGAACTTGCTTTTATCTGATTCCTAGTTCTGCTCTTAGCCACAGGCTTATAAAGGCTCCCATAGCTATTCACATATAGAACTGTAAGGAGAAAAAGGGAAGAAAGTGTTTTGGAAGAAGAAGGAAAGACAGTCTCATGAAAGGTGCTATGTATTACTATAGGATGTTCTCAGGCAGGAAGTTTTGTCTTCTAGAAAACATTGGCCCAGTATGGTCCATTTATATGTGTATATTTTCTGAAATAATTTCAAGGAAGGATATTCTAAGAAAAAAATTTGGTCTTATATTTACT…	A	8	LW2,LW3,LW4,LW5	ENSSSCG00000047558	ENSSSCT00000073357.1	upstream_gene_variant	MODIFIER	-	lncRNA	DISTANCE=3562,STRAND=1	0	0	4	4
sv_00877	1	56241334	56241628	294	DEL	TAATAACACTTTTTTTTTTTTTTTTTGTCTTTGTCTTTTTTGTTGTTGTTGTTGCTATTTCTTGGGCCGCTCCCGCGGCATATGGAGGTTCCCAGGCTAGGGGTTGAATCGGAGCTGTAGCCACCGGCCTACGCCAGAGCCACAGCAACGCGGGATCCCAGCCGCGTCTGCAACCTACACCACAGCTCACGGCAACGCGGGATCGTTAACCCACTGAGCATAGGGCAGGGACCGAACCCGCAACCTCATGGTTCCTAGTCGGATTCGTTAACCACTGCGCCACGACGGGAACTCC	T	10	WXP6,LW6,LW7,LA7,DU1,DU2,DU5	ENSSSCG00000038663	ENSSSCT00000043574.2	intron_variant,non_coding_transcript_variant,feature_truncation	MODIFIER	-	lncRNA	INTRON=4/4,STRAND=1	1	0	6	7
sv_00878	1	56257408	56257704	296	DEL	TATAAAATAAGTTGTAGGAGTTCCCGTCGTGGCGCAGTGGTTAACGAATCCGACTAGGAACCATGAGGTTGCGGGCCTTGCTCAGTGGGTTAACGATCTGGCGTTGCCGTGAGCTGTGGTGTAGATTGCAGACGCGGCTCGGATCCCGCGTTGCTGTGGCTCTGGCGTAGGCCGGTGGCTGCAGCTCCGATTCGACCCCTAGCCTGGGAACCTCCATATGCCGTGGGAGCAGCCCAAGAAATAGCTAAAAAAAAAAAAAGACAAAATAAATAAATAAATAAATAAAAATTTAAAAAA	T	11	WXP4,XP3,XP6,LW4,LW5,LW7,LA5	ENSSSCG00000038663	ENSSSCT00000043574.2	intron_variant,non_coding_transcript_variant,feature_truncation	MODIFIER	-	lncRNA	INTRON=4/4,STRAND=1	1	2	4	7
sv_00879	1	56290509	56290830	321	DEL	AATATACATCTAGCTGGAGTTCCCGTCGTGGCGCAGTGGTTAACGAATCCGACTAGGAACCATGAGGTTGCGGGTTCGGTCCCTGCCCTTGCTCAGTGGGTTAACAATCCAGCATTGCCGTGAGCTGTGGTGTAGGTTGCAGACGCGGCTCGGATCCTGCGTTGCTGTGCCTCTGGTGTAGGCCGGTGGCTACAGCTCTGATTCAACCCCTAGCCTGGGAACCTCCATATGCCGCGAGAGTGGCCCAAGAAATAGCAACAACAACAACAACAACAACAAAAGACAAAAAGACAAAAGACAAAAAAAAATATAT	A	19	WXP1,WXP2,WXP3,WXP4,WXP5,WXP6,WXP7,XP1,XP2,XP3,XP4,XP5,XP6,XP7,LW4,LW6,LA5,LA6,LA7,DU7	-	-	intergenic_variant	MODIFIER	-	-	-	7	7	6	20
sv_00880	1	56499443	56499637	194	DEL	TAAATACTGCTTATCAGACACAACCTAGAATAGATTTATAAGGAGATCCTGCTGAATAGCATTGAGAACTATGTTTAGATACTCATGTCGCAACAGAAGAAAGGGTGGGGGAAAAAAACTGTAACTGCAATGTATACATCTAAGGATGACCTGACCCCCTTGCTGTACAGTGGGAAAATAAAAAAAAAAAGAAAA	T	20	WXP1,WXP2,WXP3,WXP4,WXP5,WXP6,WXP7,XP1,XP3,XP4,XP5,XP6,XP7,LW4,LW5,LW6,LW7,LA6,LA7	-	-	intergenic_variant	MODIFIER	-	-	-	7	6	6	19
sv_00881	1	56506560	56506624	64	DUP:TANDEM	TTTTTTAAGGAACATCCATACAGTTCTCCATAGTGGCTGTACCAATTTACATTCCCGTAAACAGT	TTTTTTAAGGAACATCCATACAGTTCTCCATAGTGGCTGTACCAATTTACATTCCCGTAAACAGTTTTTAAGGAACATCCATACAGTTCTCCATAGTGGCTGTACCAATTTACATTCCCGTAAAGAGTTTTTAAGGAACATCCATACAGTTCTCCATAGTGGCTGTACCAATTTACATTCCCGTAAACAGT	3	WXP6,LW7	-	-	intergenic_variant	MODIFIER	-	-	-	1	0	1	2
sv_00882	1	56506560	56506560	63	INS	T	TTTTTTAAGGAACATCCATACAGTTCTCCATAGTGGCTGTACCAATTTACATTCCCGTAAACAG	5	WXP4,WXP5,WXP7,XP3,XP5,XP6	-	-	intergenic_variant	MODIFIER	-	-	-	3	3	0	6
sv_00883	1	56565979	56566099	120	DEL	GAATAAAAAAGTCATAGAATATACACATTCATTCCATTTATATAAAGTCAAAAGCAACAAAAGCCAAATAATAACTGTGTAGAGAGCCGTGCAAAAACCAAACAATTAGATCAAGAAACAC	G	14	WXP7,XP1,XP3,XP5,XP6,XP7,LW4,LW5,LW6,LA5,LA6,LA7,DU7	-	-	intergenic_variant	MODIFIER	-	-	-	1	5	7	13
sv_00884	1	56719872	56720557	685	DEL	GCAGGGAATGATTTTTTTTTTTCTTTTTTTTTTTTTTATTAAATTTTATTTTCCCACTGTACAGCAAGGGGGTCAGGTTATCCTTACATGTATACATTACAATTACAGTTTTTCCCCCACCATTTCTTCTGTTGCAACATGAGTATCTAGACATAGTTCTCAATGCTATTCAGCGGGATCTCCTTGTAAATCTATTCTACGTTGTGACTGATAAGCCCAAGCTCCCGATCCCTCCCACTCCCTCCCCTCCCATCAGGCAACCACAAGTCTCTTCTCCAAGTCCATGATTGATTTTCTTTTCTGAGGAGATGTTCATTTGTGCTGGATATTAGATTCCAGTTATAAGTGATGTCATATGGTATTTGTCTTTGTCTTTCTGGCTCATTTCACTCAGTATGA…	G	9	WXP7,XP1,XP6,XP7,LW4,LW6,LW7,LA4,LA5,LA6,DU5	-	-	intergenic_variant	MODIFIER	-	-	-	1	3	7	11
sv_00885	1	56758354	56758634	280	DEL	TAAAGAAGATGTGGTTGGAGTTCCCGTCGTGGCGCAGTGGTTAACGAATCCGACTAGGAACCATGAGGTTGCGGGTTCGGTCCCTGCCCTTGCTCAGTGGGTTAACGATCCAGCATTGCCGTGAGCTGTGGTGTAGGTTGCAGACGCAGCTCGGATCCCGCATTGCTGTGGCTCTGGCGTAGGCCAGTGGCTACAGCTCCGATTGGACCCCTAGCCTGGGAACCTCCATATGCCGTGGGAGCGGTCCAAGAAGTGGCAAAAAGTCAAAAAGACCAAAAAAA	T	9	WXP1,WXP3,WXP5,WXP6,XP3,XP5,XP6,XP7,LW6,LW7,LA7,DU7	-	-	intergenic_variant	MODIFIER	-	-	-	4	4	4	12
sv_00886	1	56819894	56820214	320	DEL	TAAAACAGCAATAGGAGTTCCCGTCGTGGCGCAGTGGTTAACGAATCCGACTAGGAACCATGAGGTTGCGGGTTCGGTCCCTGCCCTTGCTCAGTGGGTTAACGATCCGGCGTTGCCGTGAGCTGTGGTATAGGTTGCAGACGCGTGAGCTGTGGTGTAGGTTGCAGACGCGGCTCGGATCCCGTGTTGCTGTGGCTCTGGCGTAGGCTGGTGGCTACAGCTCCGATTCAACCCCTAGCCTGGGAATCTCCATATGCCGCGGGAGCGGCCCAAGAAATAGCAACAACAACAAAAAGACAAAAAAAAAAAAAAAAAAAAAAA	T	25	WXP3,WXP5,WXP7,XP3,XP4,XP7,LW7,LA7,DU6,DU7	-	-	intergenic_variant	MODIFIER	-	-	-	3	3	4	10
sv_00887	1	56944435	56944490	55	DEL	ACTGACAATGCCACAGGAATAGTCAAAAAAAAAAAAAAAAAAAAAAAAAAAAAAAC	A	10	LW6,LW7	ENSSSCG00000004311	ENSSSCT00000004766.4	intron_variant,feature_truncation	MODIFIER	RNGTT	protein_coding	INTRON=11/15,STRAND=-1	0	0	2	2
sv_00888	1	56981426	56982479	1053	DEL	TAACGATCCGGTGTTGCCATGAGCTGTGGTGTAGGTTGCAGATGCGGCTCGGATCCCGCGTTGCTGTTACTCTGGCGTAGGCCGGCAGCTACAGCCCCGATTGGACCCCTAGCCTGGGAACCTCCATATGTCGCAGGCGCGGCCCAAGAAATGGCAAAAAGACGAAAAAAAAAAAAAAAAAAAGAATAGACTACAGGAAGCACTCAATAACTACTGACTAACTGGCCTCCCTGTTTTAAGTTCTTTCTCGCTTCAAAACACTATCATGTTGCCAGTGGAGTTAACTTTCAAAACAATAAAAGTAATATCCTATCATTACCAATAATTAAAATGGGTCGGTAGTGTCCTATTACATGCAGAACTAAGCTAAAATACCTTATTCAAGAATTCCTGTCATGG…	T	5	XP3,XP4,XP6	ENSSSCG00000004311	ENSSSCT00000004766.4	intron_variant,feature_truncation	MODIFIER	RNGTT	protein_coding	INTRON=10/15,STRAND=-1	0	3	0	3
sv_00889	1	57050245	57050348	103	DUP:TANDEM	GGGGAGGGTTCATAGAACTCTATGTACAATTTTTACAACTTCCTCGAGTTAATTAATTAATTCCAAATAAAAAGCTTTTACTTTAAATGCCACCTGAAGAAAAA	GGGGAGGGTTCATAGAACTCTATGTACAATTTTTACAACTTCCTCGAGTTAATTAATTAATTCCAAATAAAAAGCTTTTACTTTAAATGCCACCTGAAGAAAAAGGGAGGGTTCATAGAACTCTATGTACAATTTTTACAACTTCCTCGAGTTAATTAATTAATTCCAAATAAAAAGCTTTTACTTTAAATGCCACCTGAAGAAAAA	13	LW4,LW5	ENSSSCG00000004311	ENSSSCT00000004766.4	intron_variant	MODIFIER	RNGTT	protein_coding	INTRON=2/15,STRAND=-1	0	0	2	2
sv_00890	1	57067941	57068163	222	DEL	ACAGAAGATTGAGTTCTTTTTCTTTTTTTTTTTTTTTTGTCTTTTGGGCCGCTCCTGCGGCATATGGAGGTGCCATGGCAACGCGGGATCCGAGCCGCGTCTGCAACCTACACCACAGCTCACGCGCCGGATCGCCAACCCACTGAGCAAGGGCAGGGACCGAACCCGCAACCTCATGGTTCCTAGTCGGATTCGTTAACCACTGCGCCACGACGGGAACTCC	A	13	WXP1,WXP2,WXP3,WXP5,WXP7,XP1,XP4,XP5,XP6,XP7,LW4,LA4,LA6,LA7,DU5	-	-	intergenic_variant	MODIFIER	-	-	-	5	5	5	15
sv_00891	1	57270693	57270970	277	DEL	TGTAATCTTCTTTTTTTTTTTTTTTTTTTGTCTTTTTGCCATTTCTTGGGCCGCTCCTGCGGCATATGGAGGTTCCCGGGCTAGAGGTCGAATCGGAGCTGTAGCTGCCAGCCTACGCCAGAGCCACAGCAACGCAGGATCCGAGCCGCGTCTGTGACCTACACCACAGCTCACGGCAACGCCGGAACCTTGACCCACTGAGCAAGGGCAGGGATCGAACCCGCAACCTCATGGTTCCTAGTCGGATTCGTTAACCACTGCGCCACGACGGGAACTCC	T	10	WXP4,WXP7,XP2,XP6,XP7,LW7,LA7,DU7	ENSSSCG00000024249	ENSSSCT00000004771.4	intron_variant,feature_truncation	MODIFIER	GABRR2	protein_coding	INTRON=7/8,STRAND=-1	2	3	3	8
sv_00892	1	57281467	57281766	299	DEL	TCAGAATAGCCATCATAGTTTTAGCTTTTTTTTTTTTTTTTTTTTTTTTTTGGTCTTTTTGCTATTTCTTGGGCCGCTCCCGCGGCATATGGAGGTTCCCAGGCTAGGGGTCTAATCGGAGCTGTAGCTGCCAGCCTATGCCAGAGCCATAGCAACTCGGGATCCGAGCCGCGTCTGCAACCTACACCACAGCTCACGGAAACGCCAGATCGTTAACCCACTGAGCAAGGGCAGGGATCGAACCCGCAACCTCATGGTTCCTAGTCGGATTCGTTAACCACTGCGCCATGACGGGAACTC	T	7	WXP6,WXP7	ENSSSCG00000024249	ENSSSCT00000004771.4	intron_variant,feature_truncation	MODIFIER	GABRR2	protein_coding	INTRON=7/8,STRAND=-1	2	0	0	2
sv_00893	1	57317336	57317637	301	DEL	AGAGAAAGACAGGAGTTCCCGTCGTGGCGCAGTGGTTAACGAATCCGACTAGGAACCATGAGGTTGTGGGTTCGGTCCCTGCCCTTGCTCAGTGGGTTAACGATCCGGCGTTGCCGTGAGCTGTGGTGTAGGTTGCAGACGCTGCTCGGATCCTGCGTTGCTGTGGCTCTGGCGTAGGCCGGTGGCTACAGCTCCGATTCGACCCCTAGCCTGGGAACCTCCATATGCCGCAGGAGCGGCCCAAGAAATAGCAACAACGACAAAAAAAGACCAAAAAAAAAAAAAAAAAAAAAAAAGAGAAG	A	13	WXP3,WXP5,WXP7,XP1,XP2,XP4,XP7,DU7	ENSSSCG00000024249	ENSSSCT00000004771.4	intron_variant,feature_truncation	MODIFIER	GABRR2	protein_coding	INTRON=2/8,STRAND=-1	3	4	1	8
sv_00894	1	57317346	57329285	11939	INV	AGGAGTTCCCGTCGTGGCGCAGTGGTTAACGAATCCGACTAGGAACCATGAGGTTGTGGGTTCGGTCCCTGCCCTTGCTCAGTGGGTTAACGATCCGGCGTTGCCGTGAGCTGTGGTGTAGGTTGCAGACGCTGCTCGGATCCTGCGTTGCTGTGGCTCTGGCGTAGGCCGGTGGCTACAGCTCCGATTCGACCCCTAGCCTGGGAACCTCCATATGCCGCAGGAGCGGCCCAAGAAATAGCAACAACGACAAAAAAAGACCAAAAAAAAAAAAAAAAAAAAAAAAGAGAAGGAGAAAGACAAATACCATATGATATCATTTATATGTGGAATCTAAAATATGGCACAAATGAACCTATCTACAGAAGAGAAACAGACTCACAGTCTTGGAGAACAGAC…	AATTATTGAACAGAAGCAGGTGAAAAGGATAGAGAAAATGTCACATCAGGGAACATGGTTTTAGGTCTTTTTGCAATCCACCAGAGCATGCACACACTCAGACAATCATAGAGCTACGTCTGTCTGTAAAAGTTTGCAGCCAAGCATCTAACTAAAAAGTTAGCTTCATCTGTAGAGGAGCTTCTTCTCTTGGAAGTCCTGTTCTCTCTCTCTCTCACACACACACACAGTGTCACACACGGTCACACATTCACGTGTAACATATCCGGTCCCACTCACGCATACATTCACACACATGCACACTCTCACTCACACACTGATAGGACCTCTTCTAACCTGAAAACCTTCCCTGTGTCACCCTGGCCAACACACCCTCACAAAATGATTATTCTGCCCAGC…	9	XP3,XP6,LW4	ENSSSCG00000024249	ENSSSCT00000004771.4	coding_sequence_variant,intron_variant	MODIFIER	GABRR2	protein_coding	EXON=2/9,INTRON=2/8,STRAND=-1	0	2	1	3
[truncated: 31,414 more rows]
