# Supplementary material for: Detection of genomic structure variants associated with wrinkled skin in Xiang pig by next generation sequencing
Source: Aging (Albany NY). 2021 Nov 27;13(22):24710–39. doi: 10.18632/aging.203711 (PMC8660620; doi:10.18632/aging.203711)
Supplement: Supplementary Table 7 [file aging-13-203711-s004.xlsx]

## Sheet: Sheet1
Supplementary Table 7. WXP group-specific SVs.
NO.	chr	start	end	length	type	ref	variation	gene	consequence	impact	symbol	biotype	location	impact_type
sv_10844	6	57587714	57588050	336	DEL	GGAGAAACCATACAAATGTAATGAGTGTGGCAAGGTTTTTAGGGAAAAGGCAAACCTTGCAAGTCATCAGAGAATTCATACTGGGGGGAAGCCTTACACATGTAATGAGTGTGGGGAATTCTTTTATTATGACTCCCAGCTCAGAGCACATCAGAGAATCCATACAGGTGCAAAACCACATCAGTGTGACGTGTGTGGCAAAGTCTTCCATCGAAGATCACACCTTACAGGTCATCAGAGGACTCATAGTGGAGAGAAACCATTTCAATGTAGTGAGTGTGGCAGGGTTTTCAGGGAAAAAGCAAACCTTGCGAGTCATCAGAGAATTCATGCTGGA	G	ENSSSCG00000037023	frameshift_variant,feature_truncation	HIGH	-	protein_coding	EXON=1/2,STRAND=1	Loss of amino acids
sv_10849	6	58746635	58747164	529	DEL	ACCCGCACTTACCCCTGCGGGGGCCTGAGTCCGTGGGGGGGAGGGGCTGATCCTGGGAGCCTCCTGGGGGTCAGGATGGGAGGTGAGGAGGCTGGTCCCAGCATCCCCCTCCCTGTGACCCCCTTCGCCCCCCCAAGAGCCCCTGGAGCCCTGGGGTCCCCCCAGTCTCTGCCCGACCCCACCCCCTGGATGACCAGCCTCTCCTTGAGCCTCTGAGCAGCATTAGCTCCTCCAAGACTCAAAACTGCCCTGGGTGGCCTGTGCTTCCCATGAGCAACTGGGCCCCGAGACTCCCTGTTGCTGAATTGGGGCCTGGGGGTGAGGGCTGGGGCTCCTAGGGGTCCTGGGAATGAGGCCAGGAAGGGGCTGGGGGTTGGGGATGCCCCTGGAGTCCCCACC…	A	ENSSSCG00000029231	stop_lost,coding_sequence_variant,3_prime_UTR_variant,intron_variant,feature_truncation	HIGH	-	protein_coding	EXON=6/6,INTRON=5/5,STRAND=-1	stop lost
sv_20920	12	53161161	53161400	239	DEL	CGGTAACCCTCTTTCCCCCTGACTCGTTTTCCCTGACTCCTCCTGCACACGCACAAACGCTTCCTCCGGAATGCTATACAATGTGGAAAAACGACTTGCTCGAACACACTCGTCGGCCTTGAGTCTCCCTGCCTGCGTGATGCCCCTCCGTAGTTCTGCAGTTTGGCCCTTGCTGTCTCCCCTACAGCTTCTTTCCTCAAAGACTGTGGACCTTCTAACTGCGGCTCGATCTCTCTTCCA	C	ENSSSCG00000021363	stop_lost,coding_sequence_variant,3_prime_UTR_variant,feature_truncation	HIGH	CHD3	protein_coding	EXON=37/37,STRAND=1	stop lost
sv_03787	2	48671743	48672091	348	DEL	AGTAAGTATGATTAGGAATTTAGGGTTAATCACTGTTTACATGATTATTGGGGGAAGTGAGTCAATTATAATTACGATCTGAGAGTTGGTAGGCTAGTTATTTTTAATTGCCAGCAAAACTGTTATTAAATGTTATAAATTTGAAAGTATGCATATGTTTTGCAAGGTAGGGGTAGAACTAATTGCCTATGTTGAAATTGCTCAATTTGGAGGGATTTTTTTCAACAGAAACCAGATAAAGAGTACCATGTTAGTTACTCTAGGAACTGTATGAGTCCGTGCAAACTTAAGGAAAAATGCTAATCTAAACCAAGCAGGGTTTGTAAACAAGTGGCATTTCTTTTGGTAG	A	ENSSSCG00000013405	coding_sequence_variant,intron_variant,feature_truncation	MODIFIER	EIF4G2	protein_coding	EXON=7/22,INTRON=7/21,STRAND=1	aberrant splicing
sv_03788	2	48672667	48672980	313	DEL	AGTAAGTTTTGCTGTTTCCCAATCTGGTGGATTTTAAGTTTATGATAGTACAAAGAGCTTCTTAAACTTATGGAGACTATCTGAGAATACCAGTAGAGCTTCATGTTTTTGGTGTCTTATATGTGTTTTTGAGAAGTTGTTTACAGAAATTATGTAAATAGCAAGCACTCTAGTAGTCCAGAAGTATTTTTTTTTAATTTTCTCAATATAAGAGTTTTAGGGTTTTTTTGTTTTGTTTTGTTTTGTTTTTAAGAGTTTTAGTTTTATGTAAAATAGTGTCTGGAAGCAAGTGTTTACTCACTTTATTTCTGAAG	A	ENSSSCG00000013405	coding_sequence_variant,intron_variant,feature_truncation	MODIFIER	EIF4G2	protein_coding	EXON=10/22,INTRON=10/21,STRAND=1	10 Intron deletion
sv_03789	2	48673120	48673212	92	DEL	CAGGTGATTTGGAGCAAAATAGTAAAGTTAAAAAGTCAGTTTAACATTTTAATAGTAGTAGAGTTGTAAAGAGCTGTCCATATCTGTATTTTA	C	ENSSSCG00000013405	coding_sequence_variant,intron_variant,feature_truncation	MODIFIER	EIF4G2	protein_coding	EXON=11/22,INTRON=11/21,STRAND=1	11 Intron deletion
sv_03790	2	48675413	48675496	83	DEL	CAGGTAAAACACTTTCCTAATCTGTAAGAACTTTTGGTCTTTCAAATTTGAAAACTAATAAACTATGTTATTTTGTTCCCTCGA	C	ENSSSCG00000013405	coding_sequence_variant,intron_variant,feature_truncation	MODIFIER	EIF4G2	protein_coding	EXON=16/22,INTRON=16/21,STRAND=1	aberrant splicing
sv_04030	2	78967998	78968137	139	DEL	TGTAAGTGTAGGATAAATTCACAAGTTGTCTATTTTAGTGTAGTAGTAAAAACATGTTTCTATTTAGGTGAGAGAGCATGTTAAAATTGTTTTTTTTCTAACACTTTTTGACTTGATTCTCTGAAATGCCTTATATTTAG	T	ENSSSCG00000014022	coding_sequence_variant,intron_variant,feature_truncation	MODIFIER	HNRNPH1	protein_coding	EXON=8/12,INTRON=8/11,STRAND=1	8 Intron deletion
sv_06002	3	76867706	76867956	250	DEL	AAGGTATGTTCAAAGTTGGATTTTCAAACTGAAATAGAAGGTTCTGAATCTGAATTATATGTGGGTGTGGAGTCATCTAGTGGCCACAACCACCTTAGCTTTTAAAATGCCTGCACTAGAACACATGATAATTTGTGCCGTGTCTCTTTGGATTCAGTAAACTTAGTCCTTCGTCATTCCTCATTTCAGATGATAGGATGCACTAAGTAAAAAGGTTTTTTCAGTGTTAACTGTGCCTTATATATTTTCTT	A	ENSSSCG00000008359	coding_sequence_variant,intron_variant,feature_truncation	MODIFIER	RAB1A	protein_coding	EXON=6/7,INTRON=6/6,STRAND=1	aberrant splicing
sv_07254	4	36223670	36223968	298	DEL	CACAGGTAGGTTTTAGAAGAGACCATCTACATGAGGTTTTCTTGATTGGTCCTTTTAGTGTTTCGTGTCCCCCTAAAAAATAAAGTCGGGATGAAAACATTAAGAGATGTGGGAGTTCCCTGGTGGGCTAAGCATGTTGTCACTGCTAGGGAGTAGGTTCAGTCTCCACCCGGGAGCTTCTACAATGTGAGTTGTGACTGGATTTAAAAAATGCTTAGTGTGAGCACCTGCTAAATATTTTGACAACCTGTAACTAGTTATTTGCTTTTTTCTTTAGCTTGATAACATTCTTGCTTTTT	C	ENSSSCG00000006063	coding_sequence_variant,intron_variant,feature_truncation	MODIFIER	PABPC1	protein_coding	EXON=11/18,INTRON=11/17,STRAND=1	aberrant splicing
sv_07255	4	36224682	36224763	81	DEL	TGGTGAGTCTTAACCCTTCTTGTAAAAGTTGGTCTCCAATTTGAAATAACAAGATAAATAGCAAAATGTTTTTATTTGTTCA	T	ENSSSCG00000006063	coding_sequence_variant,intron_variant,feature_truncation	MODIFIER	PABPC1	protein_coding	EXON=13/18,INTRON=13/17,STRAND=1	aberrant splicing
sv_07880	4	93902799	93902892	93	DEL	GCCTGCAGAGGGGGAGACAGGGAGGGGAGCCTCATCAAGGCCAGTGGCAGGCTGGAGGCGGTTGCCAGCACCTCCTGGACTCCCCCGCAGCCTA	G	ENSSSCG00000006496	coding_sequence_variant,intron_variant,feature_truncation	MODIFIER	LMNA	protein_coding	EXON=11/15,INTRON=10/14,STRAND=-1	aberrant splicing
sv_08017	4	105828053	105828166	113	DEL	TGTAAGAGTTGACTAACTGGCTCTTTGGTCTTCTTTTAAGGTCAGTAATGAGTTAAAATTTGAGGAAACAGTTAAAATGACATCCCTCTTCCCACTAAACTCTTTTTGATTTAG	T	ENSSSCG00000006752	coding_sequence_variant,intron_variant,feature_truncation	MODIFIER	CSDE1	protein_coding	EXON=8/20,INTRON=8/19,STRAND=1	8 Intron deletion
sv_08018	4	105831210	105831295	85	DEL	TGTGAGTAGTTTTTGAGACAAGTATTGGAGATTTTCTTGATGCTTCCTTTTTCAGTTTGAAGTTAACTTGTGTTTATCATTTGTAG	T	ENSSSCG00000006752	coding_sequence_variant,intron_variant,feature_truncation	MODIFIER	CSDE1	protein_coding	EXON=11/20,INTRON=11/19,STRAND=1	11 Intron deletion
sv_08820	5	21989247	21989333	86	DEL	CTAAAGAAAGAACATTTTTAGCATCATCTGCATCAATCCATAGAAAGGGCAAATGAACCAGGTCCTCTCAAAGCCTTCTCTCTTACT	C	ENSSSCG00000000405	coding_sequence_variant,intron_variant,feature_truncation	MODIFIER	ATP5F1B	protein_coding	EXON=7/11,INTRON=7/10,STRAND=-1	aberrant splicing
sv_10846	6	57942591	57942680	89	DEL	TCCTGGGGAGAGGGCGGCAGAGGCGCCATCAGCCCCGCGATCCCCTTTGGGACTCGGGGTCCGCCGGGGGCGGGGCGGGGGGCAGACCCA	T	ENSSSCG00000024413	coding_sequence_variant,intron_variant,feature_truncation	MODIFIER	PPP2R1A	protein_coding	EXON=7/16,INTRON=6/15,STRAND=-1	frameshift
sv_12598	7	23742453	23742947	494	DEL	TGGTGAGGGTCCTGCAAAGATGTTCCTAATTATTGGAGGCTGGGCATGAATGGGGTGTGTGTTTCAGAGCTCTTTGAAGGGAACCTATATCAAAACATTAGATGAACACTAGAGACTTTCCAGCTTTATCTTGGGTCCTGTAGGGGTACATTGCACTTTGGGTGAACACCAGTACCCTCCTACAAAGGCGTGTCTGTGGTTTCCTGTCTTTGGACACGTAAGAATTGGAGGCAAAGAAATATGGACTTGGAGACGTCTGGGGCCAGCTTGCTCCCTGCAGGCTCTAGTTCAACCATCCTACATAGAAGTATTGAATGTAAAGCATCTCTGCCTTCCTTCCTTCCTGATAGGATTTTGGAGATTACCTGGGGACAAAGAGAGGGAAGGTTTCTGAGAGAA…	T	ENSSSCG00000001409	coding_sequence_variant,intron_variant,feature_truncation	MODIFIER	PRRC2A	protein_coding	EXON=3/33,INTRON=3/32,STRAND=1	frameshift
sv_12600	7	24102759	24102912	153	DUP:TANDEM	TCCACTCACTGGTCACCCCGATGACAGAGACGGGGCCCACGCGCTGGCCGTCGTGGAAGCCGTACAGGTGCATCTTGTACTTGTGGTCGGGCTCCAGGCCCTCAACTGTCACCTCACTCTCCTCGCCCCCGACACGCACCACCTGGGGCCCGGC	TCCACTCACTGGTCACCCCGATGACAGAGACGGGGCCCACGCGCTGGCCGTCGTGGAAGCCGTACAGGTGCATCTTGTACTTGTGGTCGGGCTCCAGGCCCTCAACTGTCACCTCACTCTCCTCGCCCCCGACACGCACCACCTGGGGCCCGGCCCACTCACTGGTCACCCCGATGACAGAGACGGGGCCCACGCGCTGGCCGTCGTGGAAGCCGTACAGGTGCATCTTGTACTTGTGGTCGGGCTCCAGGCCCTCAACTGTCACCTCACTCTCCTCGCCCCCGACACGCACCACCTGGGGCCCGGC	ENSSSCG00000023611	coding_sequence_variant,intron_variant	MODIFIER	TNXB	protein_coding	EXON=26/44,INTRON=26/43,STRAND=-1	frameshift
sv_12814	7	39246037	39246138	101	DEL	CAGGTATGTGGTATTTCAGCTAGGCATGCACCATTCATATTCATTGATGTTTAGTTTGCTGTTTCTTCAAAACTTGTGTTTGACTTTTTAAAACTTTTTGGT	C	ENSSSCG00000001701	coding_sequence_variant,intron_variant,feature_truncation	MODIFIER	HSP90AB1	protein_coding	EXON=3/13,INTRON=3/12,STRAND=1	aberrant splicing
sv_14248	8	20162216	20162373	157	DEL	GTACTTGATACAGCTTTTTACATCATGCAGAATTTCTGTCGGGGGTGGGTACATGAGACTCTTTGCTGATACTGATTGTCCTATAGTAAGCATCCCTGTTTTAAGTTTTATTTCTAAAATTTGCCTGGCCCTTAAGGGATTTCTGTTTCTTCCTCAGA	G	ENSSSCG00000022155	coding_sequence_variant,intron_variant,feature_truncation	MODIFIER	RBPJ	protein_coding	EXON=11/11,INTRON=10/10,STRAND=1	frameshift
sv_20055	12	1209189	1209267	78	DEL	TCCTGGGGGCCAGGCAGCGTCAGGCCCGCCGCACCCACACCCCGGGGCTGCCTCCACCGCCACCGCCACCGCCAGCGCA	T	ENSSSCG00000033082	coding_sequence_variant,intron_variant,feature_truncation	MODIFIER	HGS	protein_coding	EXON=17/19,INTRON=16/18,STRAND=-1	aberrant splicing
sv_20273	12	14578431	14578636	205	DEL	TCAGGTAAGACCAGCTTTGGATGAGAAATGTTGATGGTCTTGGGTCACATTAATCGCCTACAGATCCATTTAAATGGGATTGGCGGGTGAGTAAAACCTTCAGTGCAGAGTGAAGTTGAGAAAATACTTCTCAAGAGTAGAGCTACCAATTCCTTTATGTTGTGATTTGTGCCATAGAAATAATCGATTTGCAATTTCTTTCTTGA	T	ENSSSCG00000032092	coding_sequence_variant,intron_variant,feature_truncation	MODIFIER	DDX5	protein_coding	EXON=12/13,INTRON=12/12,STRAND=1	aberrant splicing
sv_20395	12	20976173	20976881	708	DEL	TCTGGGCAGAAAGGTCAAGCTCGTTAAGAGAGTTGTGCTGGGAGGCCACTGCCACCCTCCCACGGGATGTCTTGCCCGGTGCAGAACTTGATACTGAAATCGTCACGGCTTAGTCAGATCAGATAAGTCCTTTGTTGGCTCTTCCCGAACAGGTCAATCCGGGACGGCTGCCTTTCCCAGCCCGAGAAAGCCTGGGCCTCTTGCCCCAGGCCCGCCCTTGGGAGCCGATCACGTGTCAGTGAAGCCTAGGCTGGCCGGCAGCGCCCCACCCGGCTGATGCAACCGGCCGGAACCCGAGCTCCGAGGCGGGGCCACACTTCCCGCCCCATTGGAGCCCACGTTTGTCACTTAGGGCTGGCGCCGCCTCTCCCTCCCCGCTCAGTGACAACGGCGGTGACG…	T	ENSSSCG00000017430	coding_sequence_variant,intron_variant,feature_truncation	MODIFIER	EIF1	protein_coding	EXON=2/4,INTRON=1/3,STRAND=-1	1 Intron deletion
sv_20430	12	22275329	22276165	836	DEL	TCTGCGGGGAAGGAGGGGCACGTGGGTGAGTGGGCGCCAAGGGAGGCAGGGGCGGAGAGGCTGGGGGGAGGGAGAGACTCGAGGTCTGGGGCAAGTGCAGGGGTGCTGGGGGGGGAACTGGGAGGTGGGGGGGACTTGAGGGCGGAGGAGCGCTGGGGGGTGGAGGGGACTGGGGGTGGAGGGGACTGGGGGTGGAGGGGTGCTGGGTGGTGGAGGGGACTGGGGGGTGGAGGGCGCTGGGGGGAGGAGGGAACTGGGAGGTGGAGGGGTGCTGGGGGTGGAGGGGACTCGGGGGTGGGGGGGTCAGGTAGCGAGGACAGAGGGATGGGAGGTGGGCCTGGGAAGAGAGGGGACTTGGAGACAGGGCAGGACTAGGGCGCAGAGAGCTGGGGTGGGAGA…	T	ENSSSCG00000035969	coding_sequence_variant,intron_variant,feature_truncation	MODIFIER	THRA	protein_coding	EXON=9/9,INTRON=8/8,STRAND=-1	8 Intron deletion
sv_23767	14	8963039	8963775	736	DEL	CCAGGTAAGAACCGCGGCTGCGCGGCCAGCCTGCGCCAGCGCCAGCGCCGCGCGCCCCCGACACTCAGGCCCGCGCCCCGCCGCTCTCTCTGCCGCGCTCCCTAGTGGCCGCTGTCCAGTGCGCGCGCGCGCGACGCAGACCCAAGTTAGAGGCTCAAAGCGTCCTCGCCCCTCCCCATCCCTTTCACCCCCCTCCCCAACGCACCATCCCTAGCTCTGAGAGCCCTGACCTTTTTCAAAACGCGCTTCTTTTCCTCGGGAGTTCTAGTTTTGCACGCTTGCGCATTTAAAGTAGGAGGTATACATTTGAGTAGTTGATAAAGCAGCAACTTTAGGATAGCTGTGCAGAAACTCATATATTCTCAACTTTTCCAGCCGTGATCGGAAGAACTCCCCCAA…	C	ENSSSCG00000009648	coding_sequence_variant,intron_variant,feature_truncation	MODIFIER	-	protein_coding	EXON=1/4,INTRON=1/3,STRAND=1	aberrant splicing
sv_24885	14	113163523	113163523	63	INS	C	CAAGCCAGCCAGTGCCACCAAGAATTCAAGTAAGCCAGCTGCCACTCCCAAGCAGTCTATAGCT	ENSSSCG00000010576	coding_sequence_variant,feature_elongation	MODIFIER	NOLC1	protein_coding	EXON=10/14,STRAND=1	aberrant splicing
sv_31065	X	45328242	45328480	238	DEL	GAGGTAATAGAGGAACTGCTCCAGACTTGCTAGGTCAAGGGATGAAGTATGACTGGCTGGGAAAAGTCCAGAGCAGGAATGAGATCTTAGGTATCGCACATGTAGGTGCCACATCATTGGTGGCATTTGTTGTTGTTACTGTGCAAACAGTAGCACAACGTAGGGCGTTAAATATATAGCAGGTGCTTCATAAATATTAATGAATACTATTCTTGGTTTTATTTTCTATTCCTTATCTC	G	ENSSSCG00000012318	coding_sequence_variant,intron_variant,feature_truncation	MODIFIER	MAGED1	protein_coding	EXON=11/13,INTRON=11/12,STRAND=1	aberrant splicing
sv_22873	13	154063341	154063435	94	DEL	TCAGACTTTTAGCTTCCAGACCCATGAGAAAATAAATTTTGGGTTAAGCTATGCAGTCTCTGATACTTTGTTATGGGAGCCCTAGAAAAAGAATA	T	ENSSSCG00000041691	5_prime_UTR_variant,feature_truncation	MODIFIER	-	protein_coding	EXON=1/1,STRAND=-1	feature truncation
sv_22573	13	122100463	122100971	508	DEL	GAGGTACCTAAGGCAGGGGAGCTGGTGGGAAAGGGTGGACCGTGGAATGCAGAGCAGCGCCTGGTGATCACAAGTTCCTTCATTTCTGCATTGATGCAAACTCCCTTTTCCCCAGGTTGTGCTTGGCTGGTTGCTCTTAGTATCTGCTTAAAAGAGATAGGGGATTGTCTTCATTCTACTCAGTAACCCCTTGGTTTGGTCCTGAGGTCCAAAGGTCCAAGACTCTTCTCTACATACTGATGGCCTTTGCCTGCCCAGTATGCCTAAAACTGAGTTCTGAGCAGCAGAGCTCTCAAAAGATGATGAGTTTGTAAAGCTCTCACTCATCCCTAACTCTGGAACAGGGACTGCCCCCTCCCAAGTCAGAAAGCTGCATTATGGCAGCTTTCCATAGACTAC…	G	ENSSSCG00000028856	5_prime_UTR_variant,intron_variant,feature_truncation	MODIFIER	ABCF3	protein_coding	EXON=4/29,INTRON=4/28,STRAND=1	feature truncation
sv_00726	1	44534350	44534404	54	DEL	GTGGCTATTCGGCCACATCTGTTATTCCACTGAACTAGGCAGAATATTTTCCCTC	G	ENSSSCG00000026978	3_prime_UTR_variant,feature_truncation	MODIFIER	ROS1	protein_coding	EXON=44/44,STRAND=1	feature truncation
sv_08996	5	33175088	33175088	88	INS	A	AAGCTAGATGTTTTGTAGGCTTGTCTCTTAGGTGCAGGTCTTAAAAGTTGGGGTGCCAGATGTGGGATTCAAACATTTTCTTCTCAGGG	ENSSSCG00000000488	3_prime_UTR_variant,feature_elongation	MODIFIER	MDM2	protein_coding	EXON=19/19,STRAND=1	feature elongation
sv_11541	6	133954335	133954335	60	INS	G	GGGAAATATTGCCAAGGCTTTTTCAAGTACCTGGTAAGTTAAGAAGGAATTCTAGCTCAGA	ENSSSCG00000043601	3_prime_UTR_variant,feature_elongation	MODIFIER	-	protein_coding	EXON=2/2,STRAND=1	feature elongation
sv_11709	6	145202371	145202432	61	DEL	AATATATTTGGGGCTCCTGGTCCTGAAATAGAAAAATGTTACGCTATTAGGGAGTAAATGCT	A	ENSSSCG00000003798	3_prime_UTR_variant,feature_truncation	MODIFIER	SERBP1	protein_coding	EXON=8/8,STRAND=1	feature truncation
sv_17825	10	10275115	10275185	70	DEL	ATTAGATATAATTCTCAGTGCCATACAGTAGAATCTCATCAAATATCTATTCCAAATGCAATAGTTTGCAT	A	ENSSSCG00000032644	3_prime_UTR_variant,feature_truncation	MODIFIER	HLX	protein_coding	EXON=7/7,STRAND=1	Loss of ssc-miR-183 binding sites
sv_20919	12	53115726	53115989	263	DEL	CAAGAGAACCACCGTGGGAGTTCCCGTCGTGGCGCAGTGGTTAACGAATCCGACTAGGAACCATGAGGTTGAGGGTTCGATCCCTGCCCTTACTCAGTGGGTTAACGATCCGGCGTTGCCGTGAGCTGTGGTGCAGGTTGCAGACGCGGCTCGGATCCTGCGTTGCTGTGGCTCTGGCGTAGGCCGGTGGCTACAGCTCCGATTCAACCCCTAGCCTGGGAACCTCCATATGCCGCGGCCCAAGAAATAGCAAAAAAAAAAAAA	C	ENSSSCG00000021363	3_prime_UTR_variant,feature_truncation	MODIFIER	CHD3	protein_coding	EXON=4/4,STRAND=1	feature truncation
sv_00113	1	8086808	8086880	72	DEL	AACACACAAACACACACACACACACACACACACACACACACACACACACACACACACACACACACACACACAC	A	ENSSSCG00000004052	upstream_gene_variant	MODIFIER	FNDC1	protein_coding	DISTANCE=4991,STRAND=-1	-
sv_00397	1	21419421	21419644	223	DEL	GTGGCGCAGTGGTTAACGAATCCGACTAGGAACCATGAGGTTGAGGGTTCAATCCCTGGCCTTGCTCAGTGGGTTAAGGATCCGGCATTGCCATGAGCTGTGTGTAGGTTGCAGACACGGCTTGGATCCCGCATTGATGTGGCTCTGGTGTAGGCTGGCGGCTACAGCCCTGATTCAACCCCTAGCTTGGGAACCTCCATATGCCACAGGAGTGGCCCAAGAAA	G	ENSSSCG00000039614	upstream_gene_variant	MODIFIER	-	protein_coding	DISTANCE=2456,STRAND=1	loss of TFs binding site
sv_02189	1	201501273	201501385	112	DEL	CAGTGTCCCTGGCCGGGGGGGGGGGGGGGGGGGGGGGGGGGGGGGGGGGGGGGGGGAATGAAAGAGAGAAGGACATCCCCATCTCACTGAGCAATTTTGTGGTGATTTAATAG	C	ENSSSCG00000031075	upstream_gene_variant	MODIFIER	-	protein_coding	DISTANCE=178,STRAND=-1	-
sv_02938	1	267478272	267478756	484	DEL	TGGAACCTGATGGGTAATGTGAAAAAAAAAGTATATAAATGTATAACTGGGTCATGTTGCTGTACAACAGAAGTTGACAGAACACTGTAATCAACAATATTAAAAAATTTAAAAATAATAAAAATAAGAGATGCTATTTAGCATGCACATATTACAAGCACTGTGCTGAACTTCCATGCTTGCCCTAAGGCACACAGTAGAAATAACAATAGCTAATGTTGGAGTTCCCATTGTGGTGCAGTGGAAATGAATCTTTTTTTTTTTTTTTTTTTTTTTTTTTGTCTTTTTGCTATTTCTTTGGGCTGCTCCCGCGGCATATGGAGGTTCCCAGGCTAGGGGTCGAATCGGAGCTGTAACCACTGGCCTACACCAGAACCACAGCAACGCGGGATCCGAGCC…	T	ENSSSCG00000005607	upstream_gene_variant	MODIFIER	RALGPS1	protein_coding	DISTANCE=2032,STRAND=1	loss of TFs binding site
sv_03137	2	5810689	5811563	874	DEL	GATAAAAATTTCTTTTTTTTTTTTTATTATTTTCCCACTGTACAGCAAGGGGGTCAGGTCATCCTTAGATGTATACATTGCAGTTACAGTTTTTTCCCCCACCCTTTCTTCTGTTGCAACATGAGTATCTAGACATAGTTCTCAATGCTATTCAGCAGGATCTCCTTATAAATCTATTCTAGGTTGTGTCTGATAAGCCCAAGCTCCCGATCCCTCCCACTCCCTCCCCCTCCCATCAGGCAACCACAAGTCTCTTCTCCAAGTCCATGATTTTCTTTTCTGAGGAGATGTTCATTTGTGCTGGATATTAGATTCCAGTTATAAGTGATATCATATGATATTTGTCTTTGTCTTTCTGGTTCATTTCACTCAGTATGAGATTCTCTAGTTCCATCCATG…	G	ENSSSCG00000040263	upstream_gene_variant	MODIFIER	-	protein_coding	DISTANCE=4912,STRAND=1	loss of TFs binding site
sv_03175	2	8358576	8358644	68	DEL	TTATTATCCTATTTTTCCTTGACTCTTAGGAAAAAAATGTTTTTAATTAGAAAAGTAAAGTATATGGCA	T	ENSSSCG00000013052	upstream_gene_variant	MODIFIER	-	protein_coding	DISTANCE=3678,STRAND=-1	loss of TFs binding site
sv_03244	2	11960420	11960496	76	DEL	CCTCCGCCTCTGTGCATTGGCACAAATTAAGTCTCGGAGAAAGAGTTTTAGGTGAAGCAGAAAGAACAGCTTAATTG	C	ENSSSCG00000048276	upstream_gene_variant	MODIFIER	-	protein_coding	DISTANCE=3642,STRAND=-1	-
sv_03957	2	66266682	66266817	135	DEL	CATGATGGAAAATAATGTGAGAAAGAGATTGTGTATAAATGTAGCAGAAGTTGACAGGAGTTCCCATCATGGCTCAGCCAACTAACGTCCATGAGGACTGTGAGTTGAATCCCTGGCCTCGCTCGGTGGGTTAAGG	C	ENSSSCG00000013726	upstream_gene_variant	MODIFIER	TNPO2	protein_coding	DISTANCE=4679,STRAND=1	-
sv_03974	2	68370717	68371393	676	DEL	AACCCTTTTGGCCTCTCCCCACTGCTTCTCCCAAGCTCCTCCAATTTAATGATCCCCACCCAACAGGTTGGGCTGGCCCAGCCTGCAGAAATGTCCAAATTCCACACTTCAGCTTGACCGGCCTTGTATGTCTGTGTGTTGAGTGAGCTGGTCAGCTAGCAAGTCTTCTTAGAGTTAAAGGAGAACCCTGATGAAGAGCCAAGAGATTCTTGGCCTACAAGCATTGCTTCTCTGTGAATTCATTATTCCATCTGGCTGCCCATGGAACTCAAAACTTGGAAGGCAAGTAACCATGTTATCTGGGATTCACCGTTCCCAGCACCCTGAATGCCAAATATCGAAAGGACAAGAACTTTAGCCAATGAAAATGCACCCTCCCCAGCTCCACCTCCTGCAAAG…	A	ENSSSCG00000031931	upstream_gene_variant	MODIFIER	-	protein_coding	DISTANCE=3879,STRAND=-1	loss of TFs binding site
sv_04626	2	129802694	129802969	275	DEL	CTTTTTTTTTTTTTGTCTTTTTGCCATTTCTTTGGGCCGCTCCTGCGGCATATGGAGGTTCCCAGGCTAGGGGTCGAATCGGAGCTGTAGCCACTGACCTACGCCAGAGCCACAGCAACACGGGATCCGAGCCGCGTCTACAACCTACACCACAGCTCATGGCAACGCCGGATCGTTAACCCACTGAGCAAGGGCAGGGACCGAACCCGAAACCTTATGGTTCCTAGTCGGATTTGTTAACCACTGCGCCACGATGGGAACTCCTCCTCTGCTTTG	C	ENSSSCG00000014248	upstream_gene_variant	MODIFIER	LMNB1	protein_coding	DISTANCE=4352,STRAND=1	loss of TFs binding site
sv_04865	2	143537750	143538086	336	DEL	TGGTGTTGCTGTGAGCTGTGGTGTAGGTCGCAGACTCAGCTCGGATCTGGTGTTGCTGTGGCTGTGGCGTAGGCCGGCAGCTGTAGCTCCATTAGACTCCTAGCCTGGGAACTTCCATGTGCCTCTGGTGTGGCCCAGAGAAACAAACAAAAAAGAACATGGGCTGAGGAGCTAGGCATACCTGAGCTCAGGCCTGGGCTCTCTTATATTATCTCTCAGCTTCCTCAGAAAGCAAGTTTAATGGAGTTTGTGTCGTGATTCAGTGGTTAACGAACCCGATTAGGATCCATGAGGTTGTGGGGTCCATCCCTGGCCTCATTTGGTGGGTTAAGGATCC	T	ENSSSCG00000014394	upstream_gene_variant	MODIFIER	RNF14	protein_coding	DISTANCE=2769,STRAND=1	loss of TFs binding site
sv_05608	3	45583364	45583451	87	DEL	TAGAGAGATAGAGAGATGTGAATGATGTACAGCAGAAATTGACAGAACATTGTAAATCCACTCTAATAAAATGTTTCAAGAGATAGAG	T	ENSSSCG00000030469	upstream_gene_variant	MODIFIER	BUB1	protein_coding	DISTANCE=1775,STRAND=1	-
sv_06012	3	77851896	77852228	332	DEL	ACAGTACGTTCTTTTTTTTTTGTCTTTTGTCTTTTGTCTTTTTTTGTCTGTTGTTGTTGTTGTTGTTGTTGCTATTTCTTGGGCCGCTCCCGCGGCATATGGAGGTTCCCAGGCTAGGGGTCAAATCGGAGCTGTAGCCACCGGCCTACGCCAGAGCCACAGCAACTCGGGATCCGAGCCGCGTCTGCAACCTACACCACAGCTCATGGCAACGCCGGATCGTTAACCCACTGAGCAAGGGCAGGGATCGAACCCGCAACCTCATGGTTCCTAGTCGGATTCGTTAACCACTGCGCCACGACGGGAGCTCCCTGCGCCACGACGGGAACTCCC	A	ENSSSCG00000027509	upstream_gene_variant	MODIFIER	VPS54	protein_coding	DISTANCE=3919,STRAND=1	-
sv_06385	3	112625473	112625755	282	DEL	AGTCACTTTTTTGTTGTTGTTGTTTTTGTTTTGTCTTTTTGCTATTTCTTGGGCCGCTCCCGCGGCATATGGAGGTTCCCAGGCTAGGGGTCGAATCGGAGCTGTAGCCACCGGCCTACGCCAGAGCCACAGCAACGCAGGATCCGAGCCGTGTCTGCAACCTACACCACAGCTCATGGCAATGCCGGATCGTTAACCCACTGAGCAAAGGCAGGGACCGAACCCGCGACCTCATGGTTCCTAGTCGGATTCGTTAACCATTGCGCCACGACGGGAACTCCGG	A	ENSSSCG00000008568	upstream_gene_variant	MODIFIER	DRC1	protein_coding	DISTANCE=3872,STRAND=-1	-
sv_06702	3	131257734	131257854	120	DEL	ACCAAACGTCACCCTCCCCGGTGCCTCAAAGCACTCAGTAAGCTCTGCTCGGTAGGGAGTCTGCCACGTGCGCCTTCATCAGCAACTTCACTCCGATGCTGCAGGAGCTGCAGGAGTCGGG	A	ENSSSCG00000025629	upstream_gene_variant	MODIFIER	COLEC11	protein_coding	DISTANCE=3183,STRAND=-1	-
sv_07034	4	18612175	18612474	299	DEL	TCTCAAAATTTTTTTTTTTTTTTTTTTTTGTCTTTTGTCTTTTTTATTGTTGTTGTTGTTGCTATTTCTTGGGCCACTCCCACGGCATATGGAGATTCCCAGGCTAGGGGTTGAATCGGAGCTGTAGCCACCGGCCTACGCCAGAGCCACAGCAACGCGGGATCCGAGCCGCGTCTGCAACCTACACCACAGCTCACGGCAACGCCGGATCGTTAACCCACTGAGCAAGGGCAGGGATCGAACCCGCAACCTCATGGTTCCTAGTCGGATTCGTTAACCACTGCGCCACGACGGGAACTC	T	ENSSSCG00000005995	upstream_gene_variant	MODIFIER	MTBP	protein_coding	DISTANCE=3573,STRAND=-1	loss of TFs binding site
sv_07954	4	100439112	100439112	82	INS	T	TACTGAATGGGAGAAAATATTTGCTAATGATACGACCAACAAGGTGTTAATATCCAAAATATATAAACAGCTCATTCAACTCA	ENSSSCG00000006701	upstream_gene_variant	MODIFIER	CHD1L	protein_coding	DISTANCE=2583,STRAND=-1	-
sv_09708	5	80503880	80503953	73	DEL	AAAAAAAGAGAGAGAGAGAGAAAAGGGAGTTCCCGTCGTGGCGCAGTGGTTAACGAATCCGACTAAGAACCATG	A	ENSSSCG00000032910	upstream_gene_variant	MODIFIER	C12orf73	protein_coding	DISTANCE=634,STRAND=1	loss of TFs binding site
sv_12107	6	165820836	165821074	238	DEL	GTCCCCGGCCCCCTCTCACTCTTGGCGAGCTCACACCTTCAGTTATCATCCGAAGCACTAATCCTTCCCACCTCCCTCTGGACATCTCCACCAGGATGTCCTACAGGGCCTGAGACTCATCGTGTCTAAAACTGCACTGAGAGTTTCCGCTGTGGCGCCATGGGATCCGTAGGGGTGGCAGTCTCTGCAGCACCAGGACGCAGGTTCAATCCCTGGTCTGGCACAGTGGGATAAAGGAC	G	ENSSSCG00000003914	upstream_gene_variant	MODIFIER	PRDX1	protein_coding	DISTANCE=3446,STRAND=1	loss of TFs binding site
sv_13518	7	100641747	100641831	84	DEL	GAATGATTGAATACATTTATACCCAAACTAGACAAAGAGCAACCTCCTCGAATTCAGGGCATTGTCTAATTATCTTTGTGTTCTC	G	ENSSSCG00000002404	upstream_gene_variant	MODIFIER	SPTLC2	protein_coding	DISTANCE=2840,STRAND=-1	-
sv_15211	8	110376765	110376838	73	DEL	TAATCAGGGACCACGAAGTGAACTCCTCAAATTGCACATCTTATCTTCCACCTGCTCTAATGTTCCCCTGAAAA	T	ENSSSCG00000009129	upstream_gene_variant	MODIFIER	TIFA	protein_coding	DISTANCE=679,STRAND=1	-
sv_15317	8	118604211	118604281	70	DEL	TTCTGTAAACTAATATCAACAAATACACAGATTGTATAATTGGAAGGGGCACACCATGAAGATTTTTTTGA	T	ENSSSCG00000009169	upstream_gene_variant	MODIFIER	SLC39A8	protein_coding	DISTANCE=1012,STRAND=1	-
sv_15342	8	120564854	120565192	338	DEL	GAGGTAAATGGGTGTACGCCTGTAATCTGGAAAAGGTGGTGGGGGGAGGCGGTGAGAGGGAAGGAGGAAAGTGATGCAAGAAAACTCCCAGGCTCTGAACGCGGTGAGAAGCTTCTGACAACGCTAGAGGGGGCTGGTGTTCATTTTGGGTTCCTCCTGAGCTTGAGTTGACTGCTTTAGGAAATAAAATTGCGTGTCCCCTTTATAGCTTTTGCATATCTTGCCATTCAGGTAGTGGGGGGAGACGGCAGTTGGTAGATACACGTTCACGAAGGTTTGATTCTTCTGGATCTTGATCCTAAGGAAAGTTGGCAGGAGATTGATTAGATTCTGTCTTCT	G	ENSSSCG00000009177	upstream_gene_variant	MODIFIER	DNAJB14	protein_coding	DISTANCE=2198,STRAND=1	loss of TFs binding site
sv_15343	8	120565323	120565600	277	DEL	TGGTATGTAAATACTAAAAATTTTTTAATTTCTTTAGATAATTCTTTACTTTTTTCCCCCACTAGAAGAGGACACTTAGTGTTATTTTCAGTGATCTGTAGTATGGTTGCATCATGAAAATTGATTCCTGTATATAACTTAGTGAATTTTTACTTCTGCATACTCTGGCCTCACATTTAAAGACTTCTTCGAAGTTGAACGTTAAACTGTCATGGTTTTGAAGTCCTGTGTTAATTTTCAAAATAATGTATATTTAAAAGTATCCCTTTCCTCCCCTA	T	ENSSSCG00000009177	upstream_gene_variant	MODIFIER	DNAJB14	protein_coding	DISTANCE=1790,STRAND=1	loss of TFs binding site
sv_18642	10	57828674	57828748	74	DEL	TTAAAAAAATTAATTTGGCAATGTCCCTCATTAAGAAGCTAATTTTTATAAGGAAGTGGAGACAGGCATTGCCCA	T	ENSSSCG00000011106	upstream_gene_variant	MODIFIER	CREM	protein_coding	DISTANCE=923,STRAND=1	-
sv_18809	11	2305150	2305467	317	DEL	TCCCATTTCTACTTTTCTTTTTTTTTTTTTTTTTTTGTCTTTTTTTGTCTTTTTCTTGTTGTTGTTGTTGTTGTTGTTGCTATTTCTTGGGCCGCTCCCGCGGCATATGGAGGTTCCCAGGCTAGGGGTTGAATCGGAGCTGTAGCCACCGGCCTACGCCAGAGCCACAGCAACGCGGGATCCGAGCCGCGTCTGCGACCTACACCACAGCTCACGGCAACGCCGGATCGTTAACCCACTGAGCAAGGGCAGGGACCGAACCTGCAACCTCATGGTTCCTAGTCGGATTCGTTAACCACCGTGCCATGACGGGAACTC	T	ENSSSCG00000009281	upstream_gene_variant	MODIFIER	-	protein_coding	DISTANCE=4802,STRAND=1	loss of TFs binding site
sv_20052	12	943373	943675	302	DEL	TGGGAACTCCGTTTTTTTTTTTTTTTTTTTTTTTTTGTCTTTTGTCTTTTGTTGTTGCTGTTGCTATTTCTTGGGCCGCTTCCGCGGCATATGGAGGTTCCCAGGCTAGGGGTCTAATCGGAGCTGTAGCTGCCAGCCTACGCCAGAGCCACAGCAACGTGGGATCCGAGCCGCGTCTGCAACCTACACCACAGCTCACGGCAACGCCAGATCCTTAACCCGCTGAGCAAGGGCAGGGACCGAACCCGCAACCTCATGGTTCCTAGTCGGATTCGTTAACCACTGCGCCACGATGGGAACTCC	T	ENSSSCG00000040352	upstream_gene_variant	MODIFIER	DUS1L	protein_coding	DISTANCE=2368,STRAND=1	-
sv_20370	12	19493151	19493444	293	DEL	TAAGAATTCAACTGCAGGAGTTCCCGTCGTGGCGCAGTGGTTAACGAATCTGACTAGGAACCATGAGGTTGCGGGTTCGGTCCCTGCCCTTGCTAAGTGGGTTAACGATCTGGCGTTGCTGTGAGCTGTGGTGTAGGTTGCAGACGCGGCTCGGATCCCGCGTTGCTGTGGCTCTGGCGTAGGCCGGTGGCTACAGCTCCGATTCAACCCCTAGCCTGGGAACCTCCATATGCCGTGGGAGCGCCCAAGAAATAGCAACAACAACAACAAAAAAGACAAAAAAAAAAAAAAAAA	T	ENSSSCG00000017377	upstream_gene_variant	MODIFIER	-	protein_coding	DISTANCE=3400,STRAND=1	loss of TFs binding site
sv_20389	12	20369884	20370078	194	DEL	CAATGAGGTCCTACTGTACAGCACAGGCAATTATATCCAATCACTTGTGATAGAACATGATGGAAGATAATATGAGAAAAGGAATGTGTATATATATATATATATATATATATATATGTTTGGGTCACTTTGCTGTAGAGCAGAAATGGACAGAACATGGTAAACCAAATATATATACTTAATTAAAAAAATTTT	C	ENSSSCG00000035446	upstream_gene_variant	MODIFIER	CAVIN1	protein_coding	DISTANCE=2398,STRAND=1	-
sv_20426	12	22075668	22076002	334	DEL	GAAAAGAAAAGAAAAGAAAAGGGGAAACAGGGAGTTCCCGTCGTGGCGCAGTGGTTAACGAATCCGACTAGGAACCATGAGGTTGCGGGTTCGGTCCCTGCCCTTGCTCAGTGGGTTAATGATCCGGCGTTGCCGTGAGCTGTGGTGTAGGTTGCAGACGCGGCTCGGATCCCGCGTTGCTGTGGCTCTGGCGTAGGCCGGTGGCTACAGCTCCGATTCAACCCCTAGCCTGGGAACCTCCATATGCCGCGGGAGCGGCCCAAGAAATAGCAACAACAACAAAAGACAAAAAGACAAAAGACAAAAAAAAAAAAAAAAAAAAAAAAAAAAAAAAA	G	ENSSSCG00000017475	upstream_gene_variant	MODIFIER	RARA	protein_coding	DISTANCE=3057,STRAND=-1	loss of TFs binding site
sv_20679	12	39646645	39646954	309	DEL	TAGAAAAGAAGGGCTGAGGAGTTCCCGTCGTGGCGCAGTGGTTAACGAATCCGACTAGGAACCATGAGGTTGCGGGTTCGGTCCCTGCCCTTGCTCAGTGGGTTAACGATCCGGCATTGCCGTGAGCTGTGGTGTAGGTTGCAGATGCGGCTCGGATCCCGCGTTGCTGTGGCTCTGGCGTAGGCCGGGGCTACAGCTCCGATTCAACCCCTAGCCTGGGGAACCTACATATGCCGCGGGAGCGGCCCAAGAAATAGCAACAACAACAACAACAAAAGACAAAAGACAAAAAAAAAAAAAAAGAAAAAAA	T	ENSSSCG00000017705	upstream_gene_variant	MODIFIER	CCL5	protein_coding	DISTANCE=1644,STRAND=1	loss of TFs binding site
sv_21376	13	2760282	2760282	50	INS	T	TGTGCTGAGCAGAGCAGACAGACCACTGTTGATTGGTCCTGGCAGAGAACA	ENSSSCG00000028911	upstream_gene_variant	MODIFIER	COLQ	protein_coding	DISTANCE=4951,STRAND=-1	loss of TFs binding site
sv_22155	13	65755282	65755342	60	DEL	CCCACTGAGCGAGGCCAGGGACCGAACCTGCAGCGTCATGGTTCCTAGTTGGGTTCGTTAA	C	ENSSSCG00000011540	upstream_gene_variant	MODIFIER	SETD5	protein_coding	DISTANCE=4652,STRAND=1	-
sv_22792	13	146418963	146419034	71	DEL	ATCCTTAACCCACTGAGCAAGGGCAGGGATCAAACCTTGGTCCTCATGGATACTAGTCAGATTCGTTTACAC	A	ENSSSCG00000024663	upstream_gene_variant	MODIFIER	-	protein_coding	DISTANCE=2189,STRAND=1	loss of TFs binding site
sv_23530	13	205673197	205673727	530	DEL	AGTCACACCAAGACCCCCTGAGCCCTCCCTCCTCTCCCGGATTCTCATCCCGCTGTCCTCGCTGCTTCCTCCCCACTGCCCCAGCCCTTCCAGATGGAACCAGATCAAAGGGACGGCTCATCACCCTGCTGGCCCTGCTGTGGCCTGGACAGGGGCCAGCACCTTCCTTGGGATGCTCCTCTTGCATCCATCTCAGGGGGAGGTGCTCAGGCCACACCCAGGGCATCACCTGCTCAGAGGGAGCTTTTGCCGTCCCCCCACCTTAGGAAAAGGTGCATTTTCTTCAAGACAAGTTGCCTCCACTGGTAAGGATGTCATTACAATAGATGTGATGTTTAGAGTTTGGATGGCACCCACCTGAGCATGGAGCTGCGTCCACATCTCCACCTCCATGGCTGC…	A	ENSSSCG00000024320	upstream_gene_variant	MODIFIER	TFF2	protein_coding	DISTANCE=873,STRAND=-1	loss of TFs binding site
sv_24896	14	113704092	113704376	284	DEL	CGCAGTGGTTAACGAATCCGACTAGGAACCATGAGGTTGCGGGTTCGATTCCTGCGCTTGCTCAGTGGGTTAACGATCCAGCGTTGCCATGAGCTGTGGAGTAGGTTGCAGACGCGGCTCGGATCCCGCGTTGTTGTGGCTCTGGCGTTGGCTGGTGGCTACAGCTCTGATTTAACCCCTAGCCTGGGAACCTCCATATGCCGCGGGAGCGGCCCAAAGAAATAGCAAAAAGACAAAAAAAACAAAAAACAAAAAGAAAAATGCTATGGGACTTCCTGTCATGGT	C	ENSSSCG00000010589	upstream_gene_variant	MODIFIER	SFXN2	protein_coding	DISTANCE=3448,STRAND=1	loss of TFs binding site
sv_29315	17	31979198	31979198	70	INS	A	ATGTGCCAGCAAGGTGTCCAATCAGCAGGCTCCATGGCTGCTCCAAATGGGTGTGTGTATTGGTGTGTTTG	ENSSSCG00000007147	upstream_gene_variant	MODIFIER	HSPA12B	protein_coding	DISTANCE=1467,STRAND=-1	-
sv_29412	17	38646660	38646795	135	DEL	TGCTGTGGCCCAGAGTCAGCCGCTTCTCATCCCCAGAGTCCACTCCAGCCTTTCGAGCAGGGCTTGGTCTGGGGACATCATTGGGCCCAGGACCCTCGCCCCGGAATGGGCCAAACTTTGTGATGAGGTCCAGGTG	T	ENSSSCG00000022864	upstream_gene_variant	MODIFIER	EIF6	protein_coding	DISTANCE=2728,STRAND=-1	loss of TFs binding site
sv_29842	18	6240347	6240347	52	INS	T	TGGTCCCGAGGGACAAGGGACGATCTCTGGCTCCAGGCTAGGGCTCTGTGCCG	ENSSSCG00000016448	upstream_gene_variant	MODIFIER	KCNH2	protein_coding	DISTANCE=3177,STRAND=1	-
sv_30690	X	6293150	6293425	275	DEL	TCAGTTTTTTATTTTTATTTATTTATTTATTTATTTATTTTGCTATCTCTTGGGCCACTCCAGCAGCATATGGAGGTTCCCAGGCTAGGGGTCCAGTCGGAGCCGTAGCCACCAGCCTATGCAAGAGCCACAGCAACGCGGGATCCGAGCCGCGTCTGCAACCTACACCACAGCTCATGGCAACGTCGTTAACCCACTGAGCAAGGGCAGGGATCGAACCGCAACCTCATGGCTCCTAGTCGGATTCGTTAACCACTGTGCCACGACGGGAACTCC	T	ENSSSCG00000012104	upstream_gene_variant	MODIFIER	-	protein_coding	DISTANCE=2708,STRAND=1	loss of TFs binding site
sv_30899	X	26220218	26220600	382	DEL	TTTGAGAAGCATTTTTTTTTTAAATTCAATGAATTTTATTATATTAATAGTTGTACAACTGTCATCACAAACTAATTTTAGAACATTTCCATACCAACCCCTCAGTCAATCCCTCCCCCACCCCAACCTGTCTCTATAAGTTTTTCAAAGCCTGTGAGTCTGTTTCTGTTCTGCTAATAAGTTCATGGTATCCTTTTGTGGTTTCCACATGTAAATGACAGCACATGTTTGTCTCTCACTGTACGCTAACTTCACATAGCATAATTTCAAGGTCCATCCATATAGCTACAAATGCCATTATTTCATTCCTTTTTATGGGTAAGTAAAAATCCATTGTGTATGTGTACCACATTTTCTTTATCTACTCTTCTGTCAATGGTTGC	T	ENSSSCG00000043733	upstream_gene_variant	MODIFIER	-	protein_coding	DISTANCE=3110,STRAND=-1	loss of TFs binding site
sv_31184	X	51078253	51079009	756	DEL	GATAGTGAAAGGCCAGTCGAGTGAAAATCCCCCTCTTCCGGACTCGGAAGAGGCGACACCCCAAATCACTCACGAGAAGCGGTCTTGATGCAAACAGCAAGAGGATTTTTATTCCAAGCGCGCTGGGGCCCACAGTCGTACGCCACGCAGGGGTAGAGGGGTAGAGGGGTAGAGGGGTAGAGGGGTAGAGGGGTAGAGGACTGTGGAGTCGGGACAGCTTTTATGGGGTTCACAACAAAGCCCGCGATTTTACAAACTAATCATTTTAAAATATCACAAACCAGTCAATTTAAAACTTCGAGAGCCCGCGCTTCGTGGACCAATTAATTTTAAGTTGTTCTGGAGTTACGTGTTTGTGCCTGTCCCTGGGCAGGGGAGACATATTGTCGCCAAGATACA…	G	ENSSSCG00000023862	upstream_gene_variant	MODIFIER	MTMR8	protein_coding	DISTANCE=487,STRAND=-1	loss of TFs binding site and promoter
sv_01214	1	92428952	92428952	69	INS	G	GTTCAACACAAAAGAGTTAGAGAATATTTTCATCACCTCTCCCAAATTCCCCTGTGCCCCTTTGAAGTCA	ENSSSCG00000004489	downstream_gene_variant	MODIFIER	EEF1A1	protein_coding	DISTANCE=4187,STRAND=1	-
sv_01025	1	71495468	71495842	374	DEL	CTCACGGCAACGTCAGATCCTTAACCCACTGAGTGAGGATGGGGATGAACCTGTGTCCTCATGGATGCTTGTCAGATTCGTTTCCGCTGAGCCATGAAGGGACCTCCCTACAGTGTTTAAACTAACAGTAACAGAAAACATGATGCTAGAAAAGCCAAACCATGTAACCACCTTTCAGCTGTGCTTGTTATGTAGTGGTAAGTTTAAAATAGTGTCTAACTTTAGACCACAATTTGAGAGGTAGAGCTCTCCAGAGAAGCACAAATATGTATGATTTGGAAAATAGCACTTACCTGGAAAAGAACAAGCTATTAGAATGATGAAGCAATTTTTTAAACTTTTTTTAAGGTTAAAATTCTTTTTACAAAATAGTAA	C	ENSSSCG00000004368	downstream_gene_variant	MODIFIER	PREP	protein_coding	DISTANCE=462,STRAND=-1	-
sv_01372	1	107672684	107672945	261	DEL	CATGGTTTTCTCTGGATAGACGCCCAGGAGTAGGATTGCTGGATCAAATGGAAGTTCTATTTTTAGTTTTCTGAGGAATCTCCATCCTGTTTTCCACAGTGGTTGCACCAATGTACAATCCCACCAACAGTGTCCTAGGTTTCCTTTTTCTCCACACCACTCCAGCACTTATTGTTTATAGACTTTTGGATGATGGCCACTCTGGCTGGTGTAAGGTGGTACCTCAGAGTGGTTTTGATTTGCATTTCTCTAAAAATGAATG	C	ENSSSCG00000004554	downstream_gene_variant	MODIFIER	PCLAF	protein_coding	DISTANCE=3210,STRAND=1	-
sv_01587	1	127789429	127789543	114	DUP:TANDEM	GCTTGGATCTGGCGTTGCTGTGGCACAGGCCTGGTTACAGCTCTGATTTGACCCCTATCCAGCTCTAGGTGCTGCGGGTGCAGCCCTAAAAAGATAAAGACACAGACACAGACAC	GCTTGGATCTGGCGTTGCTGTGGCACAGGCCTGGTTACAGCTCTGATTTGACCCCTATCCAGCTCTAGGTGCTGCGGGTGCAGCCCTAAAAAGATAAAGACACAGACACAGACACGATTTTTCTCTTGGATCTGGCGTTGCTGTGGCACAGGCCTGGTTACAGCTCTGATTTGACCCCTATCCAGCTCTAGGTGCTGCGGGTGCAGCCCTAAAAAGATAAAGACACAGACACAGACAC	ENSSSCG00000004699	downstream_gene_variant	MODIFIER	ELL3	protein_coding	DISTANCE=4585,STRAND=1	-
sv_02866	1	262704455	262705015	560	DEL	ACTTTTTCATATTTTTCCCTTCTCTGTTATTACACAATATTTAGTGTAGTTCTATGTGCTAAACATTTGGTCCTTGTTTATTATCTACTTTACATATTGTAATGTGTATATGTTTACCCCAAACTTATAATTTGTCCCTCCCTCCATTCCCCTTTGGTGACCATTTTCTATACCTGTGAATCTATTTCCATTTTGTGTATAAATTTATTTTTAACATTTTTTCTGTTACCACATATAAAGAGTATCCTATGATACATGATGTTTTCCTGCTTGGCTTACTACATTTAGTATGATAATCTCTAGGCTCATCCATGTTGCCACAAGTGGGCATTATTTTATTCTTTATATGGCTGAGTAATATTCTATTACACTGTGTACCACATTTTCTTTATCATTCAT…	A	ENSSSCG00000035100	downstream_gene_variant	MODIFIER	-	protein_coding	DISTANCE=478,STRAND=1	-
sv_03149	2	6667640	6667707	67	DEL	TGGGAAGCTCCATATGCCACAGGTGCAGCCCTAAAAAGATTTTTTAAAAAGGAAAAAAAAAGAGTTCC	T	ENSSSCG00000012988	downstream_gene_variant	MODIFIER	EHBP1L1	protein_coding	DISTANCE=1575,STRAND=-1	-
sv_03526	2	27853831	27853831	55	INS	A	ACTGAGAAAGAAAAAAAAAGGGAGTGTTACTTTGATTATAAGGTTGTTTTTAAGTT	ENSSSCG00000030326	downstream_gene_variant	MODIFIER	TCP11L1	protein_coding	DISTANCE=1575,STRAND=-1	-
sv_04688	2	132803482	132803779	297	DEL	TAAAAAAAAAAAAAAAAAAAAAGGCGTTCCTGTCGTGGCGCAGTGGTTAACGAATCCGACTAGGAACCATGAGGTTGCGGGTTCGGTCCCTGCCCTTGCTCAGTGGGTTAACGATCCGGCATTGCCGTGAGCTGTGGTGTAGGTTGCAGACGCGGCTCGGATCCCGCGTTGCTGTGGCTCTGGCATAGGCCGGTGGCTACAGCTCCGATTCACCCCCTAGCCTGGGAACCTCCATATGCCGCGGGAGCGGCCCAAGAAAGAGCAACAACAACAACAACAACAAAAGACAAAAAAAAAA	T	ENSSSCG00000035069	downstream_gene_variant	MODIFIER	CHSY3	protein_coding	DISTANCE=2295,STRAND=1	-
sv_04831	2	142007517	142007583	66	DEL	ACCTCAGAGTCTGCGCCTACGGAGAGCATCTAGGAAGACAGGCGCTGCAATGTGCAGTTTCCGGGCC	A	ENSSSCG00000038493	downstream_gene_variant	MODIFIER	PFDN1	protein_coding	DISTANCE=1379,STRAND=-1	-
sv_04848	2	142690074	142690126	52	DEL	AACCTGAGAAATCCCTTCTGATTTTATGCACACATACGTACACACACACACAC	A	ENSSSCG00000029281	downstream_gene_variant	MODIFIER	PCDHAC2	protein_coding	DISTANCE=1982,STRAND=1	-
sv_05051	3	3900313	3900408	95	DEL	GCCCCCTGGTGGTGAAGCTGGTCCAGGGCTACAGTGCACACATCCTGGAGGGCAGGGCCAGCGCCAAGGCCCAGGGGCTTCTGGGGCTGGTGTCTC	G	ENSSSCG00000022553	downstream_gene_variant	MODIFIER	TNRC18	protein_coding	DISTANCE=1302,STRAND=-1	-
sv_06484	3	118172214	118172514	300	DEL	ACCTCTGTGAGCTTTTTTTTTTTTTTTTGTCTTTTTTTTTTTTGTCTTTTGTTGTTGTTGTTTCTATTTCTTGGGCCGCTCCCGCGGCATATGGAGGTTCCCAGCCTAGGGGTCGAATCGGAGCCGTAGCCACCGGCCTACGCCAGAGCCACAGCAACACAGGATCCGAGCCACGTCTGCAACCTACACCACAGCTCATGGCAACGCCGGATCGTTAACCCACTGAGCAAGGGCAGGGACCGAACCCGCAACCTCATGGTTCCTAGTCGGATTCGTTAACCACTGCGCCACGACGGGAACT	A	ENSSSCG00000008602	downstream_gene_variant	MODIFIER	LAPTM4A	protein_coding	DISTANCE=1935,STRAND=1	-
sv_10956	6	72721688	72721688	116	INS	A	AAGTCGCAATCAAGGTCTAGGAGGTTCCTGCCTTACCCTGCTGCCTCACCGTCACTCTGAAAGCCAAGTGCTGCTGAGTGTGCCTCCAGGATGTGCACAAAACTGTCTCCAGATGCC	ENSSSCG00000003442	downstream_gene_variant	MODIFIER	C1orf158	protein_coding	DISTANCE=4457,STRAND=1	-
sv_11270	6	103808145	103808295	150	DEL	GCTGCATCTGGACCTATGCCTCACATGGAGGCAACACTGGATTCTTAACCTGAGGCCAGGGATTGAGCCTATATTCTCAGAGAGATAGCGTTGGGTTCTCAACCCGCTGAGCCACAATGGGAACTCCTAGATACATAATTCTTTATTTCCA	G	ENSSSCG00000029030	downstream_gene_variant	MODIFIER	SMCHD1	protein_coding	DISTANCE=1424,STRAND=-1	-
sv_11371	6	115693076	115693392	316	DEL	AAGGATATGAATCTCTTTTTTTTTTTTTTTTTTTTTTTTTTTGGTCTTTTGTCTTTTTTTGTTGTTGTTGTTGTTGCTATTTCTTGGGCCGCTCCCACGGCATATGGAGGTTCCCAGGCTAGGGGTCGAATCGGAGCTGTAGCCACCGGCCTACGCCAGAGCCACAGCAACGCGGGATCCGAGCCGCGTCTGAGACCTACACCACAGCTCACGGCAACGCCGGATCGTTCACCCACTGAGCAAGGGCAGGGATCGAACCCGAAACCTCATGGTTCCTAGTCGGATTCGTTAACCACTGCGCCACGACGGGAACTCCC	A	ENSSSCG00000003728	downstream_gene_variant	MODIFIER	TRAPPC8	protein_coding	DISTANCE=1549,STRAND=-1	-
sv_11962	6	157745528	157745660	132	DEL	GCAACCTCATGGTTCCTAGTCAGATTCGTTTCCACTGCACCAGGACAGGAACTCCCCAGGCCTGCTTTTCACTGAAAGGCCTCAGTTACCCCCAGCCTGGAGCTGTCAGGGCAGGGATCCCACAGCCACCAGA	G	ENSSSCG00000037559	downstream_gene_variant	MODIFIER	ACOT11	protein_coding	DISTANCE=4347,STRAND=-1	-
sv_13929	8	1528531	1528972	441	DEL	CAGCAACGCGGGATCAGAGGGGCATCTGCAACCTACACCACAGCTCACGGCAACATGGGATCCTTAACCCACTGAGCGAGGCCAGGGATCGAACCCTCAACCTCACGCCTCCTAGTCGGATTCATTAACCACTGAGCCATGACAGGAACTCCTACTGCTTCTCTTGAGATGATGTAATTTTTCTTGTTATTGTGGTGAATTAGTGGGGCTTGTTTTCTTCCTTTTCAGCTGTGCCTGCTCCAAAGTGAGGAGCTGAATCCGAGCCACAGCTGTGACCTACACCACAGCTATGGCAATACCGGATCCTTAACCCACCGCACCATAGCAGGAACTCCAGTGTTTTGTTTTTTGTTTATTTTTTTAGGGCCAAACCCACTACATATGGAAATTCCCAGGCTA…	C	ENSSSCG00000008691	downstream_gene_variant	MODIFIER	TNIP2	protein_coding	DISTANCE=4452,STRAND=-1	-
sv_14418	8	31374206	31374267	61	DEL	ACCCTCGGCTGCCCTCCCCTGTGACTGGGAGGCTAACCCAGTGGAAGGCATCACCCAGGATC	A	ENSSSCG00000008794	downstream_gene_variant	MODIFIER	RHOH	protein_coding	DISTANCE=4557,STRAND=1	-
sv_16740	9	67857743	67858049	306	DEL	TCAGATGCTCTTTCTTTTTTTTTTTTTTTGTCTTTTTTGTCTTTTGTCTATTTTGTTGTTGTTGTTGCTATTTCTTGGGCCGCTCCCGAGGCATATGGAGGTTCCCAGGCTAGGGGTCAAATCGGAGCTGTAGCCACTGGCCTACGCCAGAGCCACAGCAACGCGGGATCCGAGCCGAGTCTGCAACCTACACCACAGCTCACAGCAACGCCGGATCGTTAACCCACTGAGCAAGGTCAGGGATCGAACCCACAACCTCATGGTTCCTAGTCAGATTCGTTAACCACTGTGCCACGACGGGAACTCC	T	ENSSSCG00000022701	downstream_gene_variant	MODIFIER	-	protein_coding	DISTANCE=2635,STRAND=1	-
sv_18108	10	24245965	24246222	257	DEL	AGACCCCTAGCCTGGGAACTCCATATGCCATGGGAGCAACCCTAGAAAAGCCAAAAAAAAAAAAAATGGAGTTCCCATTGTGGCACAGTGGTTAACAAATCCGACTAGGAACCATGAGGTTGCGGGTTCGATCCCTGGCCTTGCTCAGTGGGTTAAGGATCCGGTGTTGCCGTGAGCTCTGGTATAGGCCTCAGATCTGTGGCTCAGATCTGGTATTGCTGTGGCTCTGGCGTAGGCTGGTGGCTATAGCTCCAATTC	A	ENSSSCG00000010922	downstream_gene_variant	MODIFIER	ELF3	protein_coding	DISTANCE=2907,STRAND=1	-
sv_18202	10	31115561	31115877	316	DEL	TCCAGTTTTTCTTTTTTCTTTTTTTTTTTTTTGGTCTTTTGTCTTTTTGTCTTTTGTTGTTGTTGTTGTTGTTGTTGCTATTTCTTGGGCCACTCCCGCAGCATATGGAGGTTCCCAGGCTAGGGGTTGAATCGGAGCTGTAGCCACCGGCCTACGCCAGAGGCACAGCAACGCAGGATCCGAGCCGCGTCTGCAACCTACACCACAGCTCACGGCAACGCCGGATCGTTAACCCACTGAGCAAGGGCAGGGACCGAACCTGCAACCTCATGGTTCCTAGTCGGATTCGTTAACCACTGCGCCACGACGGGAACTCC	T	ENSSSCG00000021571	downstream_gene_variant	MODIFIER	KIF27	protein_coding	DISTANCE=1058,STRAND=1	-
sv_18751	10	66663779	66663779	72	INS	T	TGATGAGGTTTCTTTCATTTGTTGGAAATGAGGCTCAACAAAAGAAACTGAATGTCACGTGAGATGAGGTTGA	ENSSSCG00000041021	downstream_gene_variant	MODIFIER	-	protein_coding	DISTANCE=21,STRAND=1	-
sv_19221	11	23896704	23896704	98	INS	G	GGACAAGGAGTTGGCATGACCTTATATTATTAGATACCACTTTGTAACTTCGATTATACGAGTAACTTATTTTTTGCAGGAAAAGAAAACCTTCTAAAT	ENSSSCG00000021818	downstream_gene_variant	MODIFIER	ENOX1	protein_coding	DISTANCE=1977,STRAND=1	-
sv_20028	11	77322401	77322609	208	DEL	CCTTGCTCAGTGGGTTAAGGATCCGGCATTGCTGTGAGCTGTGGTGTAGGTTGCAGACATGGCTCGGATCCCGAGTTGCTATGGCTCTGGCGTAGGCCGGTGGCTACAGCTCCGATTCGACCCCTAGCCTGGGAACCTCCCTATGCCCCGGGAGCAGCCCAAGGAATGGCAAAAAATAGTCCGTGCAGGTCGCAGGTTTGATCCCTGGA	C	ENSSSCG00000033732	downstream_gene_variant	MODIFIER	ANKRD10	protein_coding	DISTANCE=751,STRAND=-1	-
sv_20283	12	14963989	14964728	739	DEL	GGCTGCAGGACGCTGTAGGCACCTGCTCGCTGCCTCCTGTCACTTGACCTGGCAGCAGAGACAGCTCTTGGACTCCCTCCAGAGCTGCTGAAGCCAGGGCTGGGCCCATGTCTATTTTTTTAGGGCCGCACCTGCAGCATACGGGAAGTTCCCAGGCTGGGGATCAAATCAGAGCTGTAGCTGCCGGCCTACACCACAGCCACAGCAATGTGGGATCCAAGACACATCTGTGACCCACACTGCAACTTGCAGCAACGCCAGATCCTTAACTCACTGAGTGAGGCCAAGGATCGAATCTGCATCCTTGTGGATACAGGTTGGGTTCTTAACCCACTGAGCCACATTGGGAACTCCTGGGCGCTTGTCTTGAACTGACTGAGGCTGGGGATGGAGCAGCTG…	G	ENSSSCG00000039909	downstream_gene_variant	MODIFIER	ICAM2	protein_coding	DISTANCE=705,STRAND=1	-
sv_20391	12	20757580	20757639	59	DEL	CCCACTGAGCAAGGTGAGGGATCAAACCTGCATCCTCACGGATGCTATTCAGGTTCATTT	C	ENSSSCG00000017419	downstream_gene_variant	MODIFIER	DNAJC7	protein_coding	DISTANCE=2976,STRAND=1	-
sv_20617	12	36637556	36637616	60	DEL	CCCACTGAGCAAGGCCAGGGATCAAACCCACAACCCCATGGTTCCCAGTCAGATTCATTAA	C	ENSSSCG00000021384	downstream_gene_variant	MODIFIER	BRIP1	protein_coding	DISTANCE=3468,STRAND=1	-
sv_21599	13	12697706	12697982	276	DEL	AACACCCTTCATTTTTTTTTTTTTTTTGTCTTTTTGCTATTTCTTTGGGCCGCTCCCGCGGCATATGGAGGTTCCCAGGCTAGGGGTCCAATCGGAGCTGTAGCCACCGGCCTACGCCAGAGCCACAGCAACGCAGGATCCGAGCCGCGTCTGCGACCTACACCACAGCTCACGGCAACGCCGGATCATTAACCTACTGAGCAAGGGCAGGGATTGAACCCGCAACATCATGGTTCCTAGTCGGATCCGTTAACCACTGTGCCACGACGGGAACTCC	A	ENSSSCG00000011215	downstream_gene_variant	MODIFIER	OXSM	protein_coding	DISTANCE=2446,STRAND=1	-
sv_21716	13	19304433	19304700	267	DEL	CCCACAGCTCATAGCAACACTGGATCCTTAACCCACTGAGCAAGGAGGCCAGGGATCAAACCTTTATCCTCATGGATGCTAATGAGATTCATTTCTGCTGAGCCACGACAGGAATTCCTAACCAGTAGCTTTTTTTTTTTTTTGTCTTTTTAGGGACGCACCCGAGGCTTATAGATTTTTCCAGGCTAGGGGTAGAACCGGAGCTGTAGCTGCTGGCCTACGCCACACCGACAGCAATGCAGGAGCTGAGCCATGTCTTCAACCTACG	C	ENSSSCG00000011236	downstream_gene_variant	MODIFIER	CLASP2	protein_coding	DISTANCE=737,STRAND=-1	-
sv_21876	13	29404985	29405246	261	DEL	TCAAATTTTTTTTTTTTTTTCCTATTTCTTTGGGCCGCTCCCGTGGCATATGGAGGTTCCCAGGCTAGGGGTCGAATCGGAGCTGTAGCCACTGGCCTACGCCAGAGCCACAGCAACGCGGGATCTGAGCCGCATCTGCGACCTACACCACAGCTCATGGCAATGCCGGATCGTTAACCCACTGAGCAGGGGCAGGGACCGAACCCGCAACCTCATGGTTCCTAGTCGGATTCGTTAACCACTGCGCCACGACGGGAACTC	T	ENSSSCG00000023557	downstream_gene_variant	MODIFIER	CCRL2	protein_coding	DISTANCE=380,STRAND=1	-
sv_22353	13	90179002	90179056	54	DEL	GAGACACAGGTTCATACCCCATCACCCTGCATTGCTAATAAAATTTCCAGAATTA	G	ENSSSCG00000027459	downstream_gene_variant	MODIFIER	RNF13	protein_coding	DISTANCE=873,STRAND=1	-
sv_22392	13	95657650	95657951	301	DEL	TAAAAATAAAGAAACAGGAGTTCCCGTCGTGGCGCAGTGGTTAACGAATCCGACTAGGAACCATGAGGTTGCGGGTTCGATCCCTGCCCTTGCTCAGTGGGTGAATGATCCAGCGTTGCCGTGAGCTGTGGTGTAGGTTGCAGACACGGCTCGGATCCCGCGTTGCTGTGGCTCTGGCGTAGGCCGGTGGCTACAGCTCCGATTCAACCCCTGGCCTGGGAACCTCCATATGCTGCAGGAGCGGCCCAAGAAATAGCAACAATAACAACAACAACAACAACAACAAAAGACAAAAGACAAAA	T	ENSSSCG00000025316	downstream_gene_variant	MODIFIER	SLC33A1	protein_coding	DISTANCE=579,STRAND=-1	-
sv_23991	14	22398508	22398508	80	INS	T	TTGAACACTTGAACATTTGTTTCTAAGTAACATGACTAAATAATGCCATCAACAAACTAGACCTGGTAGACATGTTCATGG	ENSSSCG00000035148	downstream_gene_variant	MODIFIER	ZNF268	protein_coding	DISTANCE=2967,STRAND=1	-
sv_24613	14	90189902	90190047	145	DEL	ATTTTGGCTCTGTTCGTCCTGCATACACCTTCTGTAGATTGAGATGCTATATTGCCCCTCCCTAGGGGAGCAAGCCTACGGCTAAGTAAACCATTGTTACTGATCTAAGTATGTTTTGAACCGGGAAACCTAGGCTGAGAACCATG	A	ENSSSCG00000010393	downstream_gene_variant	MODIFIER	-	protein_coding	DISTANCE=2935,STRAND=1	-
sv_25230	14	134989293	134989589	296	DEL	GTGAGCTGTGGTGTAGGTCGCAGACGCGGCTCGGATCCCCGGTTGCTGTGGCTCTGGCATAGGCCGGTGGGTACAGCTCCGATTCGACCCCTAGCCTGGGAACCTCCATATGCCGCGGGAGCGGCCCAAGAAATAGCAACAACAACAACAACAAAAGACAAAAAGACAAAAAAAAAAAAAAAAAGAAAAAACAGGAGTTCCCGTTGTGGCGCAGCGGAAATGAATCCAACTAGGAACGATGAGGTTGCCAGTTCGAACCCTGGCCTTGCTCAGTGGGTTAAGGATCCGATGTTGCCT	G	ENSSSCG00000032832	downstream_gene_variant	MODIFIER	TEX36	protein_coding	DISTANCE=4445,STRAND=-1	-
sv_26827	15	110913279	110913418	139	DEL	CTCAAGAACGTTTCAATACTACCACTCTCAAATCTACTAACCTTCTAGCTCCCAGGATGGTGGCCCTTTATCTCCTTACTGTGGGAACTGACTCTCTAGTCCCACTGCTGTCTCAAGGCCCTCTCTGAGCAAGACCATCT	C	ENSSSCG00000016140	downstream_gene_variant	MODIFIER	FZD5	protein_coding	DISTANCE=2569,STRAND=-1	-
sv_29588	17	48844735	48844819	84	DUP:TANDEM	CGACTATGGAATGCCTTTCTTCTGCTTTCTGACCTAAATGAGTGGATTTTTAAAGGGAACAATATTATTTTTTCACTCAAATGCA	CGACTATGGAATGCCTTTCTTCTGCTTTCTGACCTAAATGAGTGGATTTTTAAAGGGAACAATATTATTTTTTCACTCAAATGCAGTTCTATTGTGTTTCTGTTATGTGCTGGATGACTATGGAATGCCTTTCTTCTGCTTTCTGACCTAAATGAGTGGATTTTTAAAGGGAACAATATTATTTTTTCACTCAAATGCA	ENSSSCG00000007451	downstream_gene_variant	MODIFIER	SLC2A10	protein_coding	DISTANCE=1534,STRAND=1	-
sv_29870	18	7613203	7613492	289	DEL	CAAAAATAGAAATACTCGGAGTTCCCGTCGTGGCGCAGTGGTTAACGAATCCGACTAGGAACCATGAGGTTGCAGGTTCGGTCCCTGCCCTTGCTCAGTGGGTTAACGATCCGGCGTTGCTGTGAGCTGTGGTGTAGGTTGCAGACGCAGCTCGGATCCTGCGTTGCTGTGGCTCTGGCGTAGGCCGGTGGCTACAGCTCCAATTCGACCCCTAGCCTGGGAACCTCCATATGCCGCGGGAGCGGCCAAGAAATAGCAACAACAACAAAAAACAAAAAGACAAAAAAAAA	C	ENSSSCG00000046886	downstream_gene_variant	MODIFIER	-	protein_coding	DISTANCE=3496,STRAND=-1	-
sv_29951	18	13673916	13674220	304	DEL	TCAAACCCTAGCCTGGGAGTTCCCGTCGTGGCGCAGTGGTTAACGAATCCGACTAGGAACCATGAGGTTGCGGGTTCGGTCCCTGCCCTTGCTCAGTGGGTTAACGATCCGGCGTTGCCGTGAGCTGTGGTGTAGGTTGCAGATGCGGCTCGGATCCTGCGTTGCTGTTTTGGCATTGGCCGGTGGCTACAGCTCAGATCAGACCCCTAGCCTGGGAACCTCCATATGCCGCGGGAGCGGCCCAAGAAATAGCAACAACAACAACAACAAAAAGACAAAAGACAAAAAAACAAACAAAAAAAAAA	T	ENSSSCG00000030386	downstream_gene_variant	MODIFIER	NUP205	protein_coding	DISTANCE=85,STRAND=-1	-
sv_31299	X	57471241	57471307	66	DEL	GAGGTTCCCAGGTTAGGGATTGAATTAGAGCTGTAACTGCTAGCCTATGCCACAGCCACAGCAGCGC	G	ENSSSCG00000027115	downstream_gene_variant	MODIFIER	-	protein_coding	DISTANCE=4565,STRAND=1	-
sv_30898	X	26210355	26210664	309	DEL	ACTGGAATCCCTTTCTTTTTTTTTTTTTTTTTTTTTTTGTCTTTTGTCTTTTGCTGTTGTTGTTGTTGTTGCTATTTCTTGGGCCGCTCCCGCGGCATATGGAGGTTCCCAGGCTAGGGGTTGAAACGGAGCTGTAGCCACCGGCCTACACCAGAGCCACAGCAACGCGGGATCCGAGCCGCATCTGCAACCTACACCACAGCTCACGGCAACGCCGGATCGTTAACCCACTGAGCAAGGGCAGGGACCAAACCCGCAACCTCATGGTTCCTAGTCAGATTCGTTAACCACTGCGCCACGATGGGAACTC	A	ENSSSCG00000043733	downstream_gene_variant	MODIFIER	-	protein_coding	DISTANCE=1322,STRAND=-1	-
sv_32102	X	106460032	106460612	580	DEL	ATGAGCTGTAGTGTAGGTCACAGACGCGGCTCGGATCCCATGTTGCTGTGGCTGTGGCGTAGGCTGGCAGCTACAGCTCTGATTGGACTCCTAGCCTGGAACCTCCATATACCATGGGTACCACCCTAAAAAAAAAAAAAAAAAGAAAGAAAGAAAATGCAGTTATTTATTGCAGTAATCAGAACAAGCAGGAGGGGTAAGATAGGATTATGGGATTCAGAGATACAAACTACTATGTGTAAAATAGGTAAGCAAGGATATATTGTACAGGACTGGTAACTATATCCATTATTTTTTAGTAACTTTAAAGGGAGTATAATCTATAAAAGTGTTGAATCACTGTGCTGTACACCTGAAAGTAATGTAGCATTGTAAATCAACTGTATTCAATTAAAAAAA…	A	ENSSSCG00000030606	downstream_gene_variant	MODIFIER	-	protein_coding	DISTANCE=2352,STRAND=1	-
sv_00077	1	6000520	6000770	250	DEL	TCTTTATGTCTGTTAAGTCTGCTTCTGTTTTTATATTCATCAATTTGTTTTAATTTTTAGATTCCACATATATCATACAGTATTTGTCTTTATCTGACTTATTTAACATAATGCCTCCAAGTCTACCCATGTTACTGCAAATGGTAAAATTTCATTTTTTATGGTTGAGTAGTATCCACTGTGTGTGTGTGTATTATACGTATGTACATATATGTATGCATATACATATGCATATATGCATACCACATTTC	T	ENSSSCG00000004032	intron_variant,feature_truncation	MODIFIER	PRKN	protein_coding	INTRON=3/9,STRAND=1	PAS,MBE,RNA C-to-U editing site,u1107_KLHL1-antisense-RNA
sv_00093	1	6857167	6857250	83	DEL	AGTGGACACTGGCTAGTGTGCTGCTCATGTCTTTCCTGGCCGATGTCTCTGTCCCTTCATTATTTCTCTGGTCGTCACTGCTGT	A	ENSSSCG00000004033	intron_variant,feature_truncation	MODIFIER	AGPAT4	protein_coding	INTRON=2/7,STRAND=1	-
sv_00114	1	8215739	8215889	150	DEL	ACTCTAACGTAATAGGGTTTTTTAAAATTCTCAAATTAGGAATGCATATCTCAAAAATAATCGCAGCAGAGAGGATTTGTTACCGACTTTCTGGATGCTCCTTTCAGACCCATAAGGATCTCTGCAGCTCATTTGGGCGCCTCCCTGATGC	A	ENSSSCG00000004053	intron_variant,feature_truncation	MODIFIER	TAGAP	protein_coding	INTRON=8/9,STRAND=1	-
sv_00174	1	11670799	11670979	180	DEL	GGCTGTGGCTGTGGTGTAGGCCGGCAGCTATGGCTCTGATTGGATCCCTAGCCTGGGAACCTCCATATGCCACAGGTGCAGTCCTTAAAAAAAAAAAAGACAAAGTATCTTTTTCCTTATCTTTTTTCCTATTCCTCCCACCCACAAGTTCCAGCCCATCTCACCACCTACCAGTCCATCA	G	ENSSSCG00000004065	intron_variant,feature_truncation	MODIFIER	TIAM2	protein_coding	INTRON=15/26,STRAND=-1	ESE,ESS,PAS,cis-regulatory elements of ERPIN
sv_00192	1	12337302	12337412	110	DEL	GAGGGGCGGTGGTTAGTGGGTGGTTGGGGGTGATGGTGGAGGCTTCAGTGGCCTTTGGGGAGGGTGAGGTAGGTGGTTCCTGGAAGATTTCAGCAGCTGTTGTTTCCCCTA	G	ENSSSCG00000004071	intron_variant,feature_truncation	MODIFIER	CNKSR3	protein_coding	INTRON=1/12,STRAND=1	ESE,ISE,MBE,C-to-U RNA editing sites
sv_00239	1	13845469	13845755	286	DEL	TTAAAAAATAATTTTTTTTTTTTTTTTTGTTGTTGTTGTTGTTGTTGCTATTTCTTGGGCCGCTCCCGCGGCATATGGAGGTTCCCAGGCTAGGGGTTGAATCGGAGCTGTAGCCACCGGCCTACGCCAGAGCCACAGCAACGCGGGATCCGAGCCGCGTCTGCAACCTACACCACAGCTCACGGCAACGCCTGATCCTTAACCCACTGAGCAAGGGCAGGGACCGAACCCGCAACCTCATGGTTCCTAGTTGGATTCGTTAACCACTGCGCCACGACGGAAACTCC	T	ENSSSCG00000004081	intron_variant,feature_truncation	MODIFIER	-	protein_coding	INTRON=7/34,STRAND=1	ESE,ESS,ISE,SXL binding site
sv_00317	1	17606693	17607081	388	DEL	TAATGCCATATACAAATGAGAAGGTGGAGGCTTGAAGAAGTAAAGCCAACTGCCCAAGGTCACAGAGCTAACAAGTGGTGGTGGGGGGCACTTGAACTCTGATCCTGTGACTCTAGAACCTACACTCTGCACCATGAAGCTTTACTGCTTTGGGAAGCTGTACGATATTGCAGCTTATTCCTTCTCTGATAGCCAGCTGGTGTTCAAGATTGTCTGTCTAAGAATGATCAAGTAAATATAGACAACAGGAGTTCTGTCGTGGAAACAAATCCGACTAGGAACCATGAGGTTGCGGGTTCGATCCCTGCCCTCACTCAGTGGGTTAAGGATCCAGCATTGCTGTGAGCTGTGGTGTAGGTCACAGATGCGGCTCGGATCCCGCGTTGCTG	T	ENSSSCG00000033175	intron_variant,feature_truncation	MODIFIER	SASH1	protein_coding	INTRON=1/19,STRAND=-1	Human splicing sites, ESE,ESS,ISE, Brd-Box (Brd),C-to-U RNA editing sites,functional RNA sequences,ncRNA hybridization regions
sv_00508	1	29660305	29660787	482	DEL	GCCCCTAGCCTGGGAACTTCCATATGCCATGGGTGTGGCCCTCAAAAGAAAAAAGAAAAAAAAAAGAATCAGACCTTCTAATAGTTCTAAGATAGTGAGATAAACATCAAAACAGACAAAAGCTAAAAGCTATGAATGGATAAGTGGATGAAAAAGTTAGATCTGGACCTTAAAAATATGATTAGAGTCCAATGCAAGGAAGCTGGAACAGCAAATGAGGCTGTGAAATTTCCAAAAATTGGGTCTGCCTCTTCATTCAAAGCTCACGGGGTGACAAGCAGATGCTTAGCAACTCATACAACACATATTTGCTGAACTTGATCCACGCAAGACACTGCTTGGGGTGACAAATGACACAAAGATGTCTAAACTGAAATCTTTACCCTTAAAAAATTTACA…	G	ENSSSCG00000021443	intron_variant,feature_truncation	MODIFIER	SGK1	protein_coding	INTRON=1/13,STRAND=1	ESE,ESS,ISE,MBE,C-to-U RNA editing sites,ncRNA hybridization regions
sv_00617	1	37019050	37019142	92	DEL	GTGTGTGTGTGTGTGTGTGTGTGTGTGTGTGTGTGTGTGTGTGTTTGCAAGCGCACCCAAGCACACATGCACACACATACATATGTATGCAAA	G	ENSSSCG00000004221	intron_variant,feature_truncation	MODIFIER	HINT3	protein_coding	INTRON=1/5,STRAND=-1	ncRNA hybridization regions
sv_00701	1	42766132	42766202	70	DEL	AAAAAAGGACAAAAGTCAAAAAAAAAAAACAAAAAAAAAAACAAAAAAACAACAGTGACAAAAAACTATAG	A	ENSSSCG00000004244	intron_variant,feature_truncation	MODIFIER	MAN1A1	protein_coding	INTRON=2/12,STRAND=1	ESE,UNR binding site,PAS
sv_00838	1	53380201	53380503	302	DEL	CAAAAAAAAAAAAAAAAAAAAGGAGTTCCCGTCGTGGCGCAGTGGTTAACGAATCCGACTAGGAACCATGAGGTCGCGGGTTCGGTCCCTGCCCTTGCTCAGTGGGTTAACGGTCCGGCGTTGCCGTGAGTTGTGGTGTAGGTCGCAGACGCGGCTCGGATCCCGCGTTGCTGTGGCACTGGCGTAGGCCGGTGGCTACAGCTCCGATCCAATCCCTAGCCTGGGAACCTCCATATGCCGCGGAAGCGGCCCAAGAGATAGCAACAACAACAACAACAAAAGACAAAAAGACAAAAAAAAAAA	C	ENSSSCG00000004289	intron_variant,feature_truncation	MODIFIER	CEP162	protein_coding	INTRON=18/26,STRAND=-1	ESE,ESS,ISE,PAS,C-to-U RNA editing sites,functional RNA sequences
sv_00892	1	57281467	57281766	299	DEL	TCAGAATAGCCATCATAGTTTTAGCTTTTTTTTTTTTTTTTTTTTTTTTTTGGTCTTTTTGCTATTTCTTGGGCCGCTCCCGCGGCATATGGAGGTTCCCAGGCTAGGGGTCTAATCGGAGCTGTAGCTGCCAGCCTATGCCAGAGCCATAGCAACTCGGGATCCGAGCCGCGTCTGCAACCTACACCACAGCTCACGGAAACGCCAGATCGTTAACCCACTGAGCAAGGGCAGGGATCGAACCCGCAACCTCATGGTTCCTAGTCGGATTCGTTAACCACTGCGCCATGACGGGAACTC	T	ENSSSCG00000024249	intron_variant,feature_truncation	MODIFIER	GABRR2	protein_coding	INTRON=7/8,STRAND=-1	ESE,ESS,ISE,PAS,SXL binding site,MBE,C-to-U RNA editing sites
sv_01051	1	74645288	74645365	77	DEL	ATAATTTCAATTACAAAGGGCTCTGAGAGTTACTGCTACTTCCCCTTAAAACAAAAACATTTTTTTTTTTTTTTTAAG	A	ENSSSCG00000004387	intron_variant,feature_truncation	MODIFIER	FOXO3	protein_coding	INTRON=2/3,STRAND=1	ESE,SXL binding site,PAS
sv_01130	1	83288402	83289286	884	DEL	ACAGACACTGATCTTTTTTTTTTTTTTTTTTTTTTATTTTCCCACTGTACAGCAAGGGGGTCAGGTCATCCTTAGATGTATACATTGCAGTTACAGTTTTTTTCCCCCACCCTTTCTTCTGTTGCGACATGAATATCTAGACATAGTTCCCAATGCTATTCAGCAGGATCTCCTTATAAATCTATTCTAGGTTGTGTCTGATAAGCCCAAGCTCCCGATCCCTCCCACTCCCTCCCCCTCCCATCAGGCAACCACAAGTCTCTTCTCCAAGTCCATGATTTTCTTTTCTGAGGAGATGTTCATTTGTGCTGGATATTAGATTCCAGTTATAAGTGATATCATATGGTATTTGTCTTTGTCTTTCTGGCTCATTTCACTCAGGATGAGATTCTCTAGTTC…	A	ENSSSCG00000026346	intron_variant,feature_truncation	MODIFIER	UBE3D	protein_coding	INTRON=9/9,STRAND=1	ESE,ESS,ISE, SXL binding site,MBE,functional RNA sequences,C-to-U RNA editing sites,ncRNA hybridization regions
sv_01165	1	87328300	87328656	356	DEL	TAACCTGCTGAGCCACACTGGGAACTCACCAAACTCCATGTTTATAAATGTGGTACAAATAAATATATTTTCTCCTTAAAGACTTGCTTTTGGGGGGTTTGTGTCAATTCTAGCAAAAGAAGCACTTTTATGAACTCATGTTAGGGTGCATGAATCACAGCTGTGGGCCTTTAGAATCCTACTCTGTAAAATGAAGAACACTGATATAACTGACACATTCTGTGCTTCCTAATTTTCTTCCATGCTAATTATCTGGAACCTAGGTTTTGGTTTCAGGAATGCAGGAGTTCAAACACAGCCCTGGCTGATGTTCAGAGCATTACTTAATCTCCTTAAATATGGAAAGTGGGATATTAA	T	ENSSSCG00000004472	intron_variant,feature_truncation	MODIFIER	IRAK1BP1	protein_coding	INTRON=1/3,STRAND=-1	ESE,ESS,ISE, C-to-U RNA editing sites,PAS
sv_01212	1	92325890	92326175	285	DEL	TAGAACAGGGATATGAGGAGTTCCCGTCGTGGCGCAGTGGTTAACGAATCCGACTAGGAACCATGAGGTTGCGGGTTCGGTCCCTGCCCTTGCTCAGTGGGTTAAGGGTCCGGCGTTGCCGTGAGCTGTGGTGTAGGTTGCAGACGCGGCTCGGATCCCACGTTGCTGTGGCTCTGGTGTAGGCCGGTGGCTACAGCTCTGATTCGACCCCTAGCCTGGGAACCTCCATATGCCGCAGGAGCGGCCCAAGAAATAGCAAAAAGACAAAAAAAAAAAAAAAAAAAAA	T	ENSSSCG00000004486	intron_variant,feature_truncation	MODIFIER	SLC17A5	protein_coding	INTRON=9/10,STRAND=1	ESE,ESS,ISE, C-to-U RNA editing sites
sv_01252	1	95997066	95997138	72	DEL	CCCTAAAGGGCGGCAGGAGTGAGGCCCTAAAGGGCGGGGGGAGTGAGGCCCTAAAGGGCGGGGTGAGTGAGGG	C	ENSSSCG00000004502	intron_variant,feature_truncation	MODIFIER	RNF165	protein_coding	INTRON=1/7,STRAND=1	ISE
sv_01285	1	97940349	97940450	101	DEL	TGTAAAGGGATAATTTTTTTTTTTTTTTTTTTTTTTTTTTTTTTTTGTCTTTTGTCCTATTTAGGGCCGCACCTGTGGCATATGGAGGTTCCCAGGTTAGGG	T	ENSSSCG00000028076	intron_variant,feature_truncation	MODIFIER	ZBTB7C	protein_coding	INTRON=1/4,STRAND=-1	ESE,SXL binding site,C-to-U RNA editing sites
sv_01286	1	98006602	98006896	294	DEL	ATTTTTTTTTCTTTTTTTTTTTTTTTTTTGTCTTTTGTTGTTGTTGTTGTTGCTATTTCTTGGGCCACTCCCGCGGCATATGGAGGTTCCCAGGCTAGGGGTTGAATCGGAGCTGTAGCCACCAGCCTACGCCAGAGCCACAGCAACGCGGGATCCGAGCCGCGTCTGCAACCTACACCACAGCTCACGGCAACGCCGGATCGTTAACCCACTGAGCAAGGGCAGGGACCGAACCCGCAACCTCATGGTTCCTAGTCGGATTCGTTAACCACTGCGCCACGACGGGAACTCCAAT	A	ENSSSCG00000028076	intron_variant,feature_truncation	MODIFIER	ZBTB7C	protein_coding	INTRON=1/4,STRAND=-1	ESE,SXL binding site,C-to-U RNA editing sites
sv_01378	1	108213672	108213672	70	INS	G	GGATGGTAACGTAATGTTGTTACCAATCTTTTTTTCTCTCATTTAAAGTGATTCCTACCACCACTACTACA	ENSSSCG00000004561	intron_variant,feature_elongation	MODIFIER	HERC1	protein_coding	INTRON=2/78,STRAND=1	ESE,PAS,C-to-U RNA editing sites
sv_01453	1	115708615	115708667	52	DEL	AAAGAAAGAAAGAAAGAAAGAAAGAAAGAAAGAAAGGAAGGAAGGAAGGAAGG	A	ENSSSCG00000004602	intron_variant,feature_truncation	MODIFIER	TEX9	protein_coding	INTRON=2/16,STRAND=-1	-
sv_01499	1	119500802	119501116	314	DEL	GAAGAACAGTCTCGGAGTTCCCGTCGTGGCGCAGTGGTTAACGAATCCGACTAGGAACCATGAGGTTGCGGGTTCGGTCCCTGCCCTTGCTCAGTGGGTTAACGATCCGGCGTTGCCGTGAGCTGTGGTGTAGGTTGCAGACGCGGCTCGGATCCCGCGTTGCTGTGGCTCTGGCGTAGGCCGGTGGCTGCAGCTCCGATTCGACCCCTAGCCTGGGAACCTCCATATGCCGCGGGAGCGGCCCAAGAAATAGCAACAACAACAACAACAACAAAAGACAAAAGACAAAAAATAAAATAAAATAAAATAAAAATA	G	ENSSSCG00000004621	intron_variant,feature_truncation	MODIFIER	MYO5C	protein_coding	INTRON=27/39,STRAND=1	ESE,ISE,PAS,C-to-U RNA editing sites
sv_01505	1	119812278	119812356	78	DEL	AGTTTATCCACACTGTAGTATCAGTATATTTCATTTAAATGACTGAATAATATTCTGCTCTATGTATATATCGCAATTT	A	ENSSSCG00000004625	intron_variant,feature_truncation	MODIFIER	LEO1	protein_coding	INTRON=1/12,STRAND=1	Musashi binding element (MBE)
sv_02388	1	222878325	222878625	300	DEL	GCTCACTGGTACCATTTATTTATTTATTTTTTTGTTTGTTTTTTGTTTTTGTCTTTTTTGCTATTTCTTTGGGCCGCTCCTGCGGCATATGGAGGTTCCCAGGCTAGGGGTCCAATCGGAGCTGTAGCTGCCAGCCTATGCTGGAGCCACAGCAACGCGGGATCCGAGCCGCGTCTGCAACCTACACCACAGCTCACGGCAACGCCGGATCGTTAACCCATTGAGCAAGGGCAGGGATCGAACCCGCAACCTCATGGTTCCTAGTCGGATTCGTTAACCACTGCGCCACGACGGGAACTCC	G	ENSSSCG00000005250	intron_variant,feature_truncation	MODIFIER	APBA1	protein_coding	INTRON=2/13,STRAND=-1	ESE,ESS,ISE,C-to-U RNA editing sites,GU-rich destabilization element
sv_02399	1	224518233	224518352	119	DUP:TANDEM	AGTATAAAACCAGGCCTGAAAATTTCCATAGGTAAAGTTCTAAGGAACATAAGCTTCTAAGAAAAAAAATTCACAAAACATATAAAGAAACAGTAAGCTAGAGTCAGCAGAAAATGCAAA	AGTATAAAACCAGGCCTGAAAATTTCCATAGGTAAAGTTCTAAGGAACATAAGCTTCTAAGAAAAAAAATTCACAAAACATATAAAGAAACAGTAAGCTAGAGTCAGCAGAAAATGCAAAATGTATAAAACCAGGCCTGAAAATTTCCATAGGTAAAGTTCTAAGGAACATAAGCTTCTAAGAAAAAAAATTCACAAAACATATAAAGAAACAGTAAGCTAGAGTCAGCAGAAAATGCAAA	ENSSSCG00000005257	intron_variant	MODIFIER	TRPM3	protein_coding	INTRON=1/25,STRAND=-1	PAS,RNA C-to-U editing site
sv_02408	1	226213110	226213200	90	DUP:TANDEM	TTTACATCATAAGGCCTAGCACAGAACTGTCATTCAGTGATCTGCTAAAGGGAAGAGAAGAGGGGAGAAAGGAAGAGAAAAATGAGAAAAA	TTTACATCATAAGGCCTAGCACAGAACTGTCATTCAGTGATCTGCTAAAGGGAAGAGAAGAGGGGAGAAAGGAAGAGAAAAATGAGAAAAACACCTTCTTACATCATAAGGCCTAGCACAGAACTGTCATTCAGTGATCTGCTAAAGGGAAGAGAAGAGGGGAGAAAGGAAGAGAAAAATGAGAAAAA	ENSSSCG00000028996	intron_variant	MODIFIER	ALDH1A1	protein_coding	INTRON=1/12,STRAND=-1	ESE,C-to-U RNA editing sites
sv_02523	1	238622294	238622294	61	INS	T	TTGCTCACCTCAGTCTTAGTTACAGGCCAGTTTTAGGTGTTTATGTACTTTAGGTGTTTATG	ENSSSCG00000005356	intron_variant,feature_elongation	MODIFIER	DCAF10	protein_coding	INTRON=4/6,STRAND=1	-
sv_02542	1	239983709	239983853	144	DEL	GTGCCTGTAGTGTAGGCCGGCAGCTGTAGTTCAAATTCGACCCCTAGCCTGGGAATCTCCATATGCCGCGAGTGTGGCCCTAAAAAGAAAAAAAAAAAAAATCCATACTTTTATCCATTCACATTGCTTTAGAGCAGTGCCTGGC	G	ENSSSCG00000005375	intron_variant,feature_truncation	MODIFIER	CORO2A	protein_coding	INTRON=2/12,STRAND=-1	ESE,MBE,C-to-U RNA editing sites
sv_02568	1	241731580	241731635	55	DEL	CACCCACAAAATCTTATAAGATGCTTAAGGTTGTAGCTAAACTTTTTTTCAGAATT	C	ENSSSCG00000005386	intron_variant,feature_truncation	MODIFIER	STX17	protein_coding	INTRON=3/6,STRAND=1	ESE,ESS
sv_02630	1	246244121	246244330	209	DEL	CAAGGGAGCTTGGGCTTATCAGACACAACCTAGAATAGATATACAAGGAGATCCTGCTGAATAGCATGAGAACTATGTCTAGATACTCATGTCGCAACAGAAGAAAGGGTGAGGGAAAAAACTGTAACTGCAATGTATACATCTAAGGATGACCTGACCCCCTTGCTGTACAGTGGGAAAATAATAAAAAAAAAAAAAAGAAAAAAAAAA	C	ENSSSCG00000005423	intron_variant,feature_truncation	MODIFIER	ABCA1	protein_coding	INTRON=2/50,STRAND=-1	ESE,ESS,ISE,PAS
sv_02769	1	254561462	254561774	312	DEL	TTTTTTTTTTTTTTGTCTTTTGTCTTTTTTTTGTTGTTGTTGTTTTGTTGTTGTTGTTGTTGCTATTTCTTGGGCCGCTCCCGCGGCATATGGAGGTTCCCAGGCTAGGGGTTGAATCGGAGCTGTAGCCACCGGCCTACGCCAGAGCACAGCAACGCGGGATCCGAGCCGCGTCTGCAACCTACACCACAGCTCACAGCAACGCCAGATCGTTAACCCACTGAGCAAGGGCAGGGACCGAACCCGCAACCTCGTGGTTCCTAGTCGGATTCGTTAACCACTGCGCCACGACGGGAACTCCAAAAGTCAAAAG	T	ENSSSCG00000005484	intron_variant,feature_truncation	MODIFIER	ZNF618	protein_coding	INTRON=1/15,STRAND=1	ESE,ESS,ISE,SXL binding site,C-to-U RNA editing sites
sv_02773	1	255027658	255027735	77	DEL	GAAAAAAAAAAGGTAGAGGAGCAAAAGTTCCCCCAGAAACTCAGATCCCAGAGCTAAAAAAAAAAAAAAAAAAAAAAA	G	ENSSSCG00000005490	intron_variant,feature_truncation	MODIFIER	WHRN	protein_coding	INTRON=6/11,STRAND=-1	-
sv_02881	1	264330724	264330963	239	DEL	CCCTTCAATGTAATCATCCAAGCCTCAGTTTCCTCATCTGTAAATGCAATAATGGTATGACCTACTTGAGGGGGCTGTTAGAAGTTTCCGTGAGACAGTGTTTGCCCAGATCTCTGGCCAATAGATGCCAGCAACTATCACCATTAGCAGGTGACCCTGTCTCCAGCCTCACCCACTCAGTGAACCTGTCTCCCACGCTACTCCAGAGTAGACTTTATGCCCAATTACGTCATCTGCCAG	C	ENSSSCG00000005585	intron_variant,feature_truncation	MODIFIER	DENND1A	protein_coding	INTRON=18/21,STRAND=-1	ESS,ISE
sv_02904	1	265918996	265919116	120	DEL	TCTTTCTTTCTTCCTTTCTTTTTCTTTCTTTCTTTCTTTTTCTTTCTTTCTTTCTTTCTTTCTTTCTTTCTTTCTTTCTTTCTTTCTTTCTTCCTTCCTTCCTTCCTTCCTTCCTTCCTTC	T	ENSSSCG00000005599	intron_variant,feature_truncation	MODIFIER	RABEPK	protein_coding	INTRON=3/6,STRAND=1	ISE,PAS,C-to-U RNA editing sites
sv_02955	1	268335021	268335100	79	DEL	ATTTGAATGAGTCAAAAATTAAGTAATTTTTTTAAAGTATAAGTATCTTCCAAACATTGCATGGTTGCATGGGCCTTTTT	A	ENSSSCG00000005625	intron_variant,feature_truncation	MODIFIER	ENG	protein_coding	INTRON=1/13,STRAND=-1	-
sv_03021	1	271116562	271116562	92	INS	G	GTTGCCGTGAGCTGTGGTGTAGGTTGAATATGCAGCTAGGATCCACATTGCTGTGAGCTGTGGTGTAGGTTGAATATGCAGCTAGGATCCACA	ENSSSCG00000005711	intron_variant,feature_elongation	MODIFIER	NUP214	protein_coding	INTRON=9/31,STRAND=1	ISE,C-to-U RNA editing sites
sv_03030	1	271538137	271538226	89	DEL	GAGGCCTGAGGCCGGGCTCAGCGCGCCCTCGGGAGACGCCCCGCCCTTTGGCTCCTGCCTCCCCACCCCCGTGTGGGAACACGTGACCGC	G	ENSSSCG00000005719	intron_variant,feature_truncation	MODIFIER	RAPGEF1	protein_coding	INTRON=8/25,STRAND=-1	ESE
sv_03134	2	5792317	5793075	758	DEL	ATACCTAGTCGAGAGAAGAAGACAGTTGGTGAATGAGACAATCGAGGGGAGAGCTCCAGGTGGGCACGGGGAAAGGGAGGGTTGTAATCAGATTGGTCTCCAACAAACAAGATTTTGTCAGAAGGCTCATCACCCCATCCAGGGCAAGAAACCAAGCCTGGTCCAACTCAGTGGAAAACCAAGCCCACCACTGAAGCCCTCCCTTCTAAACTGGCCAAGGTGGATTCTGATCTACATTCCCAAACCACAAACAATCCCCACCCCTGGGCCCTGCACAGAAAGACCTTGGTTGTTTACCAACAGAACGGCGGACGGAAGCAAGGTCCCCAACTTCCCCAAGAGTGGACGCACCTCAAACACCCTGCCTTCAGCCGGTGAGCGCCAAAGGGACCACTCTTT…	A	ENSSSCG00000038008	intron_variant,feature_truncation	MODIFIER	RBM14	protein_coding	INTRON=1/1,STRAND=-1	ESE,ESS,ISE,ncRNA hybridization regions
sv_03201	2	8939935	8940265	330	DEL	TGTTGCAGTGAGCTGTGATGTAGGTCAAAGACACAGCTTGGATCCCGCCTTGCTGTGGCCGTGGTGTAGGCAGGCAACTGTGGTTCCTATTTGACCCTTAGCCTGGGAACTTCTATATGCCACAGGTGTGGACATAAAAAGAAAAAAAAAAAATCACTTCGGAGCCCTTTTTAAAAAGTGAGATTTCTTTATCCTGGTCCAGACTTTCTGAATCCAAGTGGAACCTTAGTAACTGTAAATTTAAATGTTTTTACTGCTCAGCTCTTGTTAACTGCCCTGCTATATGATCTCCAAGAGTTTTCCATTTATCCTCTTCAGTTCCCAGAGTGGA	T	ENSSSCG00000026293	intron_variant,feature_truncation	MODIFIER	STX5	protein_coding	INTRON=3/8,STRAND=1	ESE,ESS,ISE,K-Box (KB),C-to-U RNA editing sites
sv_03204	2	9059688	9059998	310	DEL	CAAGAAAGCTGGAGGAGTTCCCGTCGTGGCGCAGTGGTTAACGAATCCGACTAGGAACCATGAGGTTTCGGGTTCGGTCCCTCCCCTTGCTCAGTGGGTTAACGATCCGGCGTTGCCGTGAGCTGTGGTGTAGGTCGCAGACGCGGCTCGGATCCCGCGTTGCTGTGGCTCTGGCGTAGGCCGGTGGCTACAGCTCCTATTCAACCCCTAGCCTGGGAACCTCCATATGCCGCGGGAGCGGCCCAAGAAATAGCAACAACAGCAACAACAACAACAACAGACAAAAAGACAAAAGACAAAAAAAAAAAAAA	C	ENSSSCG00000020823	intron_variant,feature_truncation	MODIFIER	BSCL2	protein_coding	INTRON=5/12,STRAND=1	ESE,ISE,C-to-U RNA editing sites
sv_03281	2	14439380	14439685	305	DEL	TCCCATGGTCCCTATTTTTTTTTTTTTTTTTTTTTTTGTCTTTTGTCTTTTTTGTTGTTGTTGTTGCTATTTCTTGGGCCGCTCCCGTGGCATATGGAGGTTCCCAGGCTAGGGGTTGAATCGGAGCTGGAGCCACCGGCCTACGCCAGAGCCACAGCAACGCGGGATCCGAGCCGCGTCTGCAACCTACACCACAGCTCACGGCAACGCCGGATCGTTAACCCACTGAGCATAGGGCAGGGATCGAACCCGAAACCTCATGGTTCCTAGTTGGATTCGTTAACCACTGCGCCACGACGGGAACTC	T	ENSSSCG00000031436	intron_variant,feature_truncation	MODIFIER	-	protein_coding	INTRON=1/1,STRAND=1	ESE,ISE,SXL binding site
sv_03313	2	16611778	16612068	290	DEL	TAAGAAAATCTGAGACCAGGAGTTCCCGTCATGGCGCAGTGGTTAACGAATCCGACTAGGAACCATGAGGTCGCGGGTTCGGTCCCTGCCCTTGCTCAGTGGGTTAACGATCTGGTGTTGCCGTGAGCTGTGGTGTAGGTTGCAGACGTGGCTCAGATCCTGCGTTGCTGTGGCTCTGGCGTAGGCCTGTGGCTACAGCTCCGATTAGACCCCTAGCCTGGGAACCTCCATATGCCGTGGGAGCGGCCCAAGAAATAGCAAAAAAAAAAAAAAAAAAAAAAAAAAAAAAAA	T	ENSSSCG00000013270	intron_variant,feature_truncation	MODIFIER	CRY2	protein_coding	INTRON=1/10,STRAND=-1	ESE,ESS,ISE,C-to-U RNA editing sites,functional RNA sequences,ncRNA hybridization regions
sv_03472	2	25622346	25622540	194	DEL	TGCCCCCACGTGACTGCAGGTGCCCGTGGCAAAGTTATACTTCTGATTGACAGGCTATAAATTCTGGGAGTTCCCACAACCCCCTCCTCAGGTTTGATGATTCTCTAGACCCACTCATAGAACTCACCCTATTATAAAGCGTGCAATTCAGGAACAGCCAATGGAAGAGAGGCACAGGTCAAGGTATGGGGGGAG	T	ENSSSCG00000013296	intron_variant,feature_truncation	MODIFIER	SLC1A2	protein_coding	INTRON=1/10,STRAND=1	ESS,ISE
sv_03525	2	27830873	27830948	75	DUP:TANDEM	GGACCTTGTTGTTTATCCATCCCATATATAATTGCCTCTACTAATTCAAAACTCCCAATTCTTCCCTCTCATACCC	GGACCTTGTTGTTTATCCATCCCATATATAATTGCCTCTACTAATTCAAAACTCCCAATTCTTCCCTCTCATACCCTCTTTGGCTGCCAAAAGTCTGTCCTCTGTATCTATGAGTCTGTTTTTATTTCATAGGTTGATTGTTGACCTTGTTGTTTATCCATCCCATATATAATTGCCTCTACTAATTCAAAACTCCCAATTCTTCCCTCTCATACCC	ENSSSCG00000040954	intron_variant	MODIFIER	CSTF3	protein_coding	INTRON=8/22,STRAND=1	ISE
sv_03586	2	33878408	33878408	64	INS	T	TATAGTTTTCAGTAGCAACTGAACTGATAGGAGACTCACAGAAAATAATTTCATTAGTAAAGAGC	ENSSSCG00000013339	intron_variant,feature_elongation	MODIFIER	ANO3	protein_coding	INTRON=2/27,STRAND=-1	MBE.PAS,C-to-U RNA editing sites
sv_03643	2	38291655	38291707	52	DEL	TAGGAAGGAGGGAAGGAAGGAATGAAGGAAGGAAGGAAGGAAGGAAGGAAGGA	T	ENSSSCG00000039940	intron_variant,feature_truncation	MODIFIER	NELL1	protein_coding	INTRON=11/17,STRAND=-1	PAS
sv_03650	2	38539750	38540054	304	DEL	TACAAATAGCAACTGTCTGGGGGAAAAACTGTAATTGTAATGTATACATGTAAGGATAACCTGACCCCCTTGCTGTACAGTGGGGAAAAAAAAAACACAGATACATTCAGTTTAATGAAATACACTTGAAGTGATAAAGTTTGGAAGTTGAAAAATGGATGAGACCAAAGGCCAACAAAAATAAGAAAGTGATGATATTAGATGAGATTGAAATTAAAATTAAAACATCAAATATGTATGTGTGACCAAAGAATGAATTAAACCTATCTCAGCTTTAAAAAAAAAAAACAAAAAAAAAACAAAAA	T	ENSSSCG00000039940	intron_variant,feature_truncation	MODIFIER	NELL1	protein_coding	INTRON=5/17,STRAND=-1	ESE,ISE,UNR binding site,Brd-Box (Brd),PAS
sv_03651	2	38615832	38615983	151	DUP:TANDEM	ATCTATATATCTATTTCTATACATATATATCTACATCTAAATTAAGCTAAATACAACTTTATACTAATGTCTTAAACTCTAATACACTATTACATAGGCCATTCCAGTCTCTTCCCCATACTTACTAAAACCTCCCATGATCTACCATCCAT	ATCTATATATCTATTTCTATACATATATATCTACATCTAAATTAAGCTAAATACAACTTTATACTAATGTCTTAAACTCTAATACACTATTACATAGGCCATTCCAGTCTCTTCCCCATACTTACTAAAACCTCCCATGATCTACCATCCATTCTATATATCTATTTCTATACATATATATCTACATCTAAATTAAGCTAAATACAACTTTATACTAATGTCTTAAACTCTAATACACTATTACATAGGCCATTCCAGTCTCTTCCCCATACTTACTAAAACCTCCCATGATCTACCATCCAT	ENSSSCG00000039940	intron_variant	MODIFIER	NELL1	protein_coding	INTRON=3/17,STRAND=-1	ESE,PAS,C-to-U RNA editing sites
sv_03657	2	39010182	39010280	98	DEL	GGATCCAGCGTTGCCGTGAACTGTGGTGTATGTAGGTCGCAGACGAGGCTCGGATCCTGAGTTTCTGTGGCTCTGGCGTAGGCCAGTAGCTACGTCCCT	G	ENSSSCG00000013347	intron_variant,feature_truncation	MODIFIER	PRMT3	protein_coding	INTRON=6/14,STRAND=-1	ESE,C-to-U RNA editing sites
sv_03718	2	43005561	43005703	142	DUP:TANDEM	CGTGATCGCTAGTGATTGTCTTCTCAGTGGGAGAAACCTCCGGGTGGTGTAAGATTGTAAATCCAAATTGAAATTTGAAGTAATTCACATTAATTTATAACCATTTATAGATGATCAATACTTTCATATAAAAATTCTCATTT	CGTGATCGCTAGTGATTGTCTTCTCAGTGGGAGAAACCTCCGGGTGGTGTAAGATTGTAAATCCAAATTGAAATTTGAAGTAATTCACATTAATTTATAACCATTTATAGATGATCAATACTTTCATATAAAAATTCTCATTTGTGATCGCTAGTGATTGTCTTCTCAGTGGGAGAAACCTCCGGGTGGTGTAAGATTGTAAATCCAAATTGAAATTTGAAGTAATTCACATTAATTTATAACCATTTATAGATGATCAATACTTTCATATAAAAATTCTCATTT	ENSSSCG00000034191	intron_variant	MODIFIER	SOX6	protein_coding	INTRON=15/18,STRAND=1	PAS
sv_04048	2	81889820	81890105	285	DEL	AGGAAATAACCACTTCTTTTTTTTTTTTTTTTTTTTGTCTTTTTGCTATTTCTTTGGGCCGCTCCCACGGCATATGGAGGTTCCCAGGGTAGGGGTCGAATCGGAGCTGTAGCCACCGACCTAAGCCAGAGCCACAGCAACGCTGGATCCGAGCCGCGTCTGCAACTTACACCACAGCTCACGGCAACGCCGGATCGTTAACCCACTGAGCAAGGGCAGGGACCGAACCCGCAACCTCATGGTTCCTAGTCAGATTCGTTAACCACTGCACCACGACAGGAACTCC	A	ENSSSCG00000029096	intron_variant,feature_truncation	MODIFIER	HRH2	protein_coding	INTRON=2/2,STRAND=-1	ESE,SXL binding site,C-to-U RNA editing sites
sv_04145	2	89558610	89558946	336	DEL	TGACAATCAGTATTTTATTTATTTATTTATTTATTTATTCATTTATGTATTTATTTTTTGTCTTTGTCTCTTTTTTGTTGTTGTTGTTGTTGTTGTTGCTATTTCTTGGGCCGCTCCCACGGTATATGGAGGTTCCCAGGCTAGGGGTTGAATCGGAGCTGCAGCCACCGGCCTACACCAGAGCCACAGCAACGCAGGATCCGAGCCGCGTCTGCGACCTACACCACAGCTCACGGCAACGCCGGATCATTAACCCACTGAGCAAGGGCAGGGACCGAACCGCAACCTCATGGTTCCTAGTCGAATTCGTTAACCACTGCGCCACGACGGGAACTCC	T	ENSSSCG00000014127	intron_variant,feature_truncation	MODIFIER	RASGRF2	protein_coding	INTRON=1/26,STRAND=1	ESE,AU-rich class-2 Element (ARE2),C-to-U RNA editing sites
sv_04147	2	89565540	89565695	155	DEL	GGGCCTTTAAAGTGTAGATTGTGATTCAGCCTGTCAAGGTCTAGACAGTGCATTTCCTTTTTTTTTTTTTTTTAGGGCCTCATCCATTCCCAGGCTAGGGGAAGTTCCCAGGCTAGGGGTCGAATTGGAGTTGTAGCTGCCAGCCTACACCACAGC	G	ENSSSCG00000014127	intron_variant,feature_truncation	MODIFIER	RASGRF2	protein_coding	INTRON=1/26,STRAND=1	ESE,SXL binding site
sv_04148	2	89597467	89597780	313	DEL	CTCTTTTTTTTTTTTTTTTTTGTCTTTTGTCTTTTTGTTGTTGTTGTTGTTGTTGTTATTGTTGCTATTTCTTGGGCCGCTCCCGCGGCATATGGAGGTTCCCAGGCTAGGGGTTGAATCGGAGCTGTAGCCACCGGCCTACGCCAGAGCCATAGCAACGCGGGATCCGAGCCGCGTCTGCAACCTACACCACAGCTCACGGCAACGCCGGATCGTTAACGCACTGAACAAGGGCAGGGATCGAACCCGCAACCTCATGGTTCCTAGTCGGATTCGTTAACCACTGCGCCACCACGGGAACTCCCGTATTTTCT	C	ENSSSCG00000014127	intron_variant,feature_truncation	MODIFIER	RASGRF2	protein_coding	INTRON=1/26,STRAND=1	ESE,ESS,SXL binding site,C-to-U RNA editing sites
sv_04149	2	89633943	89634244	301	DEL	TACAATTGTGGAGTTCCCGTCGTGGCGCAGTGGTTAACGAATCCGACTAGGAACCATGAGGTTGCGGGTTCAGTCCCTGCCCTTGCTCAGTGGGTTAACGATCCGGCGTTGCCGTGAGCTGTGGTGTAGGTCGCAGACGCGGCTCAGATCCCGAGTTGCTGTGGCTCTGGCGTAGGCCGGTGGCTACGCTCCGATTCAACCCCTAGCTTGGGAACCTCCATATGCCGCGACAGCGGCCCAAGAAATAGCAACAACAACAACAACAACAAAAAGACAAAAGACAAAAAAAAAAAAAAAAAAAA	T	ENSSSCG00000014127	intron_variant,feature_truncation	MODIFIER	RASGRF2	protein_coding	INTRON=4/26,STRAND=1	ESE,ESS,PAS,C-to-U RNA editing sites
sv_04216	2	98115480	98115583	103	DUP:TANDEM	ATATAAGCAGAAATCATTTTAATATCATTATTGCCTCATCAATTATAATCATCCATTTTATACTTAATAAATACTTGTTTTTGATTTATGCAGATCTATTTCAT	ATATAAGCAGAAATCATTTTAATATCATTATTGCCTCATCAATTATAATCATCCATTTTATACTTAATAAATACTTGTTTTTGATTTATGCAGATCTATTTCATTATAAGCAGAAATCATTTTAATATCATTATTGCCTCATCAATTATAATCATCCATTTTATACTTAATAAATACTTGTTTTTGATTTATGCAGATCTATTTCAT	ENSSSCG00000035025	intron_variant	MODIFIER	ADGRV1	protein_coding	INTRON=87/91,STRAND=1	acceptor, ESE,PAS,Polyadenylation_site
sv_04365	2	112754383	112754467	84	DEL	CGCTATTAGGAAGGAAAGCATGCATACGACACTACGGAGAGAAGAGCCTCTCTCAACCATACACAGGACCTGAGACCATAACTCA	C	ENSSSCG00000036520	intron_variant,feature_truncation	MODIFIER	EFNA5	protein_coding	INTRON=1/3,STRAND=-1	ESE
sv_04618	2	129529910	129530219	309	DEL	CAAAAATGTGGGAACATGGAGTTCCCGTCGTGGCGCAGTGGTTAACGAATCCGACTAGGAACCATGAGGTTGCGGGTTCGGTCCCTGCCCTTGCTCAGTGGGTTCAGGATCCGGCGTTGCCATGAGCTGTGGTGTAGGTTGCAGACGTGGCTCGGATCCCGCGTTGCTGTGGCTCTGGCGTAGGCCGGTGGCTACAGCTCCGATTCAACCCCTAGCCTGGGAACCTCCATATGCCGTGGGAGCGGCCCAAGAAATAGCAACAACAACAACAACAAAACAACAACAACAAAACAAAAAGACAAAAAAAAAA	C	ENSSSCG00000022402	intron_variant,feature_truncation	MODIFIER	GRAMD2B	protein_coding	INTRON=1/14,STRAND=1
sv_04673	2	131870355	131870425	70	DEL	TCTGCAACCTACACCACAGCTCACGGCAACGCTGGATCCTCAACCCACTGAGCGAGGCCAGGGACCTTAC	T	ENSSSCG00000014258	intron_variant,feature_truncation	MODIFIER	ISOC1	protein_coding	INTRON=4/4,STRAND=1	ESE,ESS,PAS,C-to-U RNA editing sites
sv_04709	2	133642319	133642578	259	DEL	TAAGAAGAACAGGCCAGGAGTTCCCGTCGTGGCACAGTGGTTAACGAATCCGACTAGGAACCATGAGGTTGCGGGTTCGATCCCTGCCCTTGCTCAGTGGGTTAACGATCCGGCGTTGCCGTGAGCTGTGGTGTAGGTTGCAGACGCGGCTCGGATCCCGCGTTGCTGTGGCTCTGGCGTAGGCCGGTGGCTACAGCTCCGATTTGACCCCTAGCCTGGGAACCTCCATATGCCGCGAGACAAAAAAAAAAAAAAAAAAA	T	ENSSSCG00000036686	intron_variant,feature_truncation	MODIFIER	CDC42SE2	protein_coding	INTRON=4/6,STRAND=1	acceptor, ESE,PAS,C-to-U RNA editing sites,functional RNA sequences
sv_04852	2	142851022	142851324	302	DEL	GTGCATAAAAATTTTTTTTTTTGTCTTTTGTCTTTTTGTCTTTTGTTGTTGTTGTTGTTGTTGCTATTTCTTGGGCCGCTCCCGCGGCATATGGAGGTTCCCAGGCTGGGGGTCGAATCGGAGCTGTAGCCACCGGCCTACGCCAGAGCCACAGCAACGCAGGATCCGAGCCGCGTCTGCAACCTACACCACAGCTCACGGCAACGCCGGATCCTTAACCCACTGAGTAAGGGCAGGGACCGAACCCGCAACCTCATGGTTCCTAGTCGGATTCGTTAACCACTGCGCCACGACGGGAACTCC	G	ENSSSCG00000036516	intron_variant,feature_truncation	MODIFIER	-	protein_coding	INTRON=2/3,STRAND=1	ESE,SXL binding site,C-to-U RNA editing sites,ncRNA hybridization regions
sv_04904	2	145710654	145710944	290	DEL	TATAAAAATATCTATAGGGAGTTCCCGTCGTGGCGCAGTGGTTAACGAATCCGACTAGGAACCATGAGGTTGCGGGTTCGGTCCCTGCCCTTGCTCAGTGGGTTAAGGATCCGGCGTTGCTGTGAGCTGTGGTGTAGGTTGCAGACGCGGCTCGGATCCCGAGTTGCTGTGGCTCTGGCGTAGGCCAGTGGCTGCAGCTCCGATTCGACCCCTAGCCTGGGAACCTCCATATGCCGCGGGAGCGGCCCAAAGAAATAGAAAAAAATAAATAAATAAATAAAAATAAAAAAA	T	ENSSSCG00000032826	intron_variant,feature_truncation	MODIFIER	KCTD16	protein_coding	INTRON=1/1,STRAND=1	ESE,PAS,C-to-U RNA editing sites
sv_04957	2	148321688	148321688	50	INS	C	CCAGGTTAATCGTGCTACCCAAATGGTCTATATCCTTATTTCATAGACATA	ENSSSCG00000028976	intron_variant,feature_elongation	MODIFIER	PPP2R2B	protein_coding	INTRON=1/9,STRAND=-1	C-to-U RNA editing sites
sv_05068	3	4629574	4629848	274	DEL	ACTGTAGCACTGATTTTTTTTTTTTTTTTTTTTTGCCTTTTCGAGGGCCGCTTCCCGCGGCATATGGAGGTTCCTAGGCTAGGGGTCGAATCAGAGCTGTAGCCACCGGCCTACGCCAGAGCCACAGCAACATGGGATCAGAGCCGCATCTGCAACCTACACCACAGCTCAAAGCAACGCCGGATCCTTAAACCACTGAGCAAGGCCAGGGATCGAACCCGCAACCTCATGGTTCCTAGGCAGATTCGTTAACCACTGCGCCACGACGGGAACTC	A	ENSSSCG00000039719	intron_variant,feature_truncation	MODIFIER	ZDHHC4	protein_coding	INTRON=7/12,STRAND=-1	ESE,ESS,SXL binding site
sv_05085	3	5107279	5107414	135	DEL	AAAGGACCTTAATAATCAATGGGGAAGGTGCAAAAAGGACCTTAATAATCAACGGGGAAGGTGCAAAAAGGACCTCAATAATCAACGGGGAAGGTGCAAAAAGGACCTTAATAATCAACGGGGAAGGTGCAGAAAG	A	ENSSSCG00000007592	intron_variant,feature_truncation	MODIFIER	EIF2AK1	protein_coding	INTRON=14/16,STRAND=1	ESE
sv_05102	3	5910335	5910552	217	DEL	TCTGGTGGGCATCCTCCAGCAGCGGAGCAGGGCTTCTGGTGTCGCTTGCTGCCTACTGGTGGGCATCCTCGCAGCAGCGGAGAAGGGCTTCTAGTGTCGCTCTGCCTTCTGGTGGGCATCCTCGCAGCAGCGGAGCAGGGCTTCTGCTGTCGCTTGCTGCCTACTGGTGGGCATCCTCGCAGCAGCGGAGAAGGGCTTCTGCTGTCGCTTGCTGCCTA	T	ENSSSCG00000007606	intron_variant,feature_truncation	MODIFIER	TRRAP	protein_coding	INTRON=1/71,STRAND=1	acceptor,ESE
sv_05227	3	13835395	13835395	103	INS	A	AATCAGTTCTCAAATCTAGGGTCAAAGCTAGGAGGTAGGAAATACTTTCTCAGTTCTCTTTACTTTCAAACTCTGCTTTGGCACTCCTCTGTTGGGGGCGGTAG	ENSSSCG00000007727	intron_variant,feature_elongation	MODIFIER	AUTS2	protein_coding	INTRON=1/18,STRAND=1	C-to-U RNA editing sites
sv_05230	3	13932137	13932215	78	DEL	ACTAGGGGTCAAATCAGAGCTACAGCTGCCAGCCTACACCACAGCCATAGCAACGCTCTATCCAAGCCGTGTCTGTGAG	A	ENSSSCG00000007727	intron_variant,feature_truncation	MODIFIER	AUTS2	protein_coding	INTRON=2/18,STRAND=1	ESE,ESS,ssc-miR-4331
sv_05406	3	23629818	23629818	88	INS	T	TACAATAGGACTTTTTATTTGTCTCTTTTTTTATTTCTAATTTTTTTTTAATTTTTATTTATTTTTTAAATTACTCAAATGAACTTCTC	ENSSSCG00000007838	intron_variant,feature_elongation	MODIFIER	OTOA	protein_coding	INTRON=11/29,STRAND=-1	Polyadenylation Signal (PAS)
sv_05472	3	27283820	27284082	262	DEL	CAGATTTTTTTTTTTTTTTTGCTATTTCTTTGGGCCGCTTCCGCGGCATGTGGAGGTTCCCAGGCTAGGGGTTGAATCGGAGCTGTAGCCGCCGGCCTACGCCAGAGCCACAGCAACGTGGGATCCGAGCCGCGTCTGCAACCTACACCACAGCTCACGGCAATGCCGGATCATCAACCTACTGAGCAAGGGCAGGGACCGAACCCGCAACCTCATGGTTCCTAGTCGGATTCGTTAACCACTGCGCCACGACGGGAACTCCA	C	ENSSSCG00000007872	intron_variant,feature_truncation	MODIFIER	XYLT1	protein_coding	INTRON=3/11,STRAND=-1	ESE,SXL binding site,C-to-U RNA editing sites
sv_05510	3	31766955	31767012	57	DEL	GGGATGCAGGCCAGGGAGGAGCAGGCCCTGGTCACTGTGGGCTCAGGGCCCCCCTGCA	G	ENSSSCG00000007899	intron_variant,feature_truncation	MODIFIER	-	protein_coding	INTRON=60/65,STRAND=1	ESE,C-to-U RNA editing sites
sv_05515	3	32990242	32990392	150	DEL	GTGGTGGTGGTGGTGATGGTAAAGATGATGATAGTGGTGATGGTGATGATAATGGTGGTGATGATGACAGTGGTGATGGTGGTGATGATGGTGATGGTGGTGGTGGTGGTGGTGGTGATGATGGTGGTGGTGGTGGTGGTGGTGATGATGA	G	ENSSSCG00000031290	intron_variant,feature_truncation	MODIFIER	GRIN2A	protein_coding	INTRON=2/13,STRAND=1	Polyadenylation sites, MBE
sv_05543	3	35405416	35405416	53	INS	G	GGCCTACACCACAGCTCACCACAATGCCAGATCCTTAACCCACTGAGCGAGGCC	ENSSSCG00000007917	intron_variant,feature_elongation	MODIFIER	RBFOX1	protein_coding	INTRON=4/15,STRAND=-1	ESE,C-to-U RNA editing sites
sv_05709	3	53238903	53239044	141	DEL	TAAGGATCCAGCGTTGCTATGAGCTGTGGTGTAGGTTGCGACATGGCTCAGATCCCATGTTGCTGTGGCTGTGGTGTAGGCTGTAGCTCCGACTCGACCCCTAGTCTGGGAACCTCCATATGCCATGGGTGCGGCCATAAAG	T	ENSSSCG00000008169	intron_variant,feature_truncation	MODIFIER	TBC1D8	protein_coding	INTRON=4/18,STRAND=1	ESE,Polyadenylation Signal (PAS)
sv_05740	3	55268564	55269398	834	DEL	ACAATGGGAACTCCCACCACTATTAACTTTTTTTTTTTTTTAAACTGATTTTCAGTACTCTTAGAAGACTTTTTATACTATCTTACATGAACTTTTAAATGTAGCTAGGATAAATCTACTTAGTGCTTTGTATCATGCTTTGTTCTACGTGAGAAGACAATAGAGTGGATGGAGCATTTAAGACTTAGATGAGTTTGAGTCTCCCCATCTGGCTGTGTGATCCTATCCTTTAACTTCTCTCAATCTCAGTTCATCAGCTGTAAAATGGAGAGATAATACGCCTAGGGAGTTCCCTGGTGGCTCAGCGGGTTGTCAGTTGCTGAAGTGTTCTATCCCAGGCCTGGGAACTTCCACATGCCTGGGTTGCAATGCCCCACCCCTTACCCCCTAAAAAAGAGA…	A	ENSSSCG00000008186	intron_variant,feature_truncation	MODIFIER	TSGA10	protein_coding	INTRON=13/19,STRAND=1	ESE,ESS,Polyadenylation sites,SXL binding site,MBE,ncRNA hybridization regions
sv_05743	3	55428635	55428968	333	DEL	TTACCTTTACAGTTTCTTTTTTTTTGTTTGTTTGTTTTTTTGTTTTTTTGTTTTTTTTGTTTTTGTTGATGTTGTTTGTTGTTGTTGTTGTTGCTATCTCTTGGGCCGCTTCCGCGGCATATGGAGGTTCCCAGGCTAGGGGTCGAATCGGAGCTGTAGCCACCGGCCTACGCCAGAGCCACAGCAACTCGGGATCCGAGCCGCGTCTGCAACCTACACCACAGCTCACGGCAACGCCGGATCGTTAACCCACTGAGCAAGGGCAGGGACCGAACCCGCAACCTCATGGTTCCTAGTCGGATTCGTTAACCACTGCGCCACGACAGGAACTCCC	T	ENSSSCG00000008187	intron_variant,feature_truncation	MODIFIER	CRACDL	protein_coding	INTRON=1/9,STRAND=1	ESE,SXL binding site,GU-rich destabilization element,C-to-U RNA editing sites
sv_05769	3	57525989	57526271	282	DEL	GGCAACATCGGATTCTTTTTTTTTTTTTTTTGTCTTTTTTTTGTCATTTCTTGGGCCGCTCCCGCGGCATATGGAGGTTCCCAGGCTAGGGGTCGAATCGGAGCTGTAGCTGCCGGCCTATGCCAGAACCACAGCAACACAGGATCCAAGCTGCGTCTGCGACCTACACCACAGCTCATGGCAACGCCAGATCCTTAACCCACTGAGCAAGGGCAGGGATCGAACCTGCAACCTCATGGTTCCTAGTCAGATTCGTTAACCACTGCGCCACGATGGGAACTCC	G	ENSSSCG00000008209	intron_variant,feature_truncation	MODIFIER	TEX37	protein_coding	INTRON=2/2,STRAND=-1	ESE,SXL binding site,C-to-U RNA editing sites
sv_05777	3	58233466	58233586	120	DEL	AGAGGGAGAGAGGGAGAGAGGGAGAGAGGGAGAGAGGGAGAGAGGGAGGGAGGGGGGGGGGGGGGGGGGGGGGGGGGGGGGGGGGGGGGGGAGAGGGGAGAGAGGGAGAGAGGGAGAGAGG	A	ENSSSCG00000008222	intron_variant,feature_truncation	MODIFIER	-	protein_coding	INTRON=1/5,STRAND=1	Polyadenylation sites
sv_05907	3	68508430	68508711	281	DEL	TAGAAGTACTTCTAGGAGTTCCTGTCGTGGCGCAGTGGTTAACGAATCCAACTAAGAACCATGAGGTTGCAGGTTCGATCCCTGCCCTTGCTCAGTGGGTTAACGATCCGGCATTGCCGTGAGCTGTGGTGTAGGTTGCAGACGCGGCTCGGATTCCGCATTGCTGTGGCTCTGGCATAGGCTGGCAGCTACAGCTCCGATTAGACCCCTAGCTTGGGAATCTCCATATGCCGTGGGAGTGGCCCAAGAAATGGCAAAAAGACAAAAAAAAAAAAAAAAAAA	T	ENSSSCG00000008266	intron_variant,feature_truncation	MODIFIER	LOXL3	protein_coding	INTRON=4/13,STRAND=1	acceptor,ESE
sv_05916	3	69141619	69141737	118	DEL	CAGTGGAAACGAATCCAACTAGAATCCACGAGGATGTGGGATTGATCCCTGGCCTCACTCTGTGGGTCCGGGATCCAGAATTGCTGTAAGCTGCAGTGTAGGTCGCAGACTCGTCTCAG	C	ENSSSCG00000008300	intron_variant,feature_truncation	MODIFIER	STAMBP	protein_coding	INTRON=10/10,STRAND=-1	ESE,C-to-U RNA editing sites
sv_05975	3	73824618	73824618	98	INS	T	TGCTTAGATGTTCTTGGAGTTCCCGTCGTGGCACAGTGGTTAACGAATCCAACTAGGAACCATGAGGTTTGCGGGTTCGATCCCTGCCCTTGCTCAGTG	ENSSSCG00000008346	intron_variant,feature_elongation	MODIFIER	APLF	protein_coding	INTRON=1/10,STRAND=-1	ESE,C-to-U RNA editing sites
sv_06097	3	86198853	86199674	821	DUP:TANDEM	TAAAGAAAAGAGCATGAAGTAAAGTCAGCCATACAATGAGACACCAACATCAAATGCTTTCACTGACATGTAGAATCTGAAAAAAGGACAGACTGAACTTCTTTGCAGAACAGATGCTGACTCACAGACATTGAAAAACTTATGGTCTCCTGAGGAGACAGTTTGGGGATTGGGGGGATGTGCCTGGGCTGTGGGATGGAAATCCTGTGAAATCAGATTGTTATGATCAACTACAGATGTGATAAATTCATTTGAGTAATAAAAAAAAAAGAGAGAAAAAAAAGAAAAGAGCATGGATTTGTAAATCTCTCCAGATTCAATCTCAGATCCATTGCTTTTTTGTTTTGTGACTTTAGGGGAATTACTTAGCCTTTTTATGCCTCTTGTTCCTTATATGTG…	TAAAGAAAAGAGCATGAAGTAAAGTCAGCCATACAATGAGACACCAACATCAAATGCTTTCACTGACATGTAGAATCTGAAAAAAGGACAGACTGAACTTCTTTGCAGAACAGATGCTGACTCACAGACATTGAAAAACTTATGGTCTCCTGAGGAGACAGTTTGGGGATTGGGGGGATGTGCCTGGGCTGTGGGATGGAAATCCTGTGAAATCAGATTGTTATGATCAACTACAGATGTGATAAATTCATTTGAGTAATAAAAAAAAAAGAGAGAAAAAAAAGAAAAGAGCATGGATTTGTAAATCTCTCCAGATTCAATCTCAGATCCATTGCTTTTTTGTTTTGTGACTTTAGGGGAATTACTTAGCCTTTTTATGCCTCTTGTTCCTTATATGTG…	ENSSSCG00000032007	intron_variant	MODIFIER	RTN4	protein_coding	INTRON=1/6,STRAND=1	acceptor,ESE,Polyadenylation sites,K-Box (KB),MBE,cis-regulatory elements of ERPIN,ncRNA hybridization regions
sv_06207	3	98013543	98013543	54	INS	T	TCAACCCGCCAGGCCATCAGAGAGCTCCCAACCCGCTAGGCCATCAGAGAGCTCC	ENSSSCG00000008467	intron_variant,feature_elongation	MODIFIER	EML4	protein_coding	INTRON=19/22,STRAND=-1	-
sv_06317	3	107208256	107208626	370	DEL	CGGTGTTGCCGTGAGCTGGGGTGTAGGTTGCAGATGCGGCTCGGATCCTGCATTGCTGTGGCTCTGGCGTAGGCCAGTGGCTACAGCTCTGATTCGACCCCTAGCCTGGGAACCTCCATATGCCGCGGGAGTGGCCCAAAGAAATAGCAAAAAGACCAAAAAAAAAAAAAAAATTTTTGAACTTAAAGTATTCTTTAATCAAAGATTCAAATACCAGAGAGTTCCCATAGTGGCTCAGCAGTAATTAACCCAACTAGTATCCATGAGGACACAGGTTCGATCCCAAGCTTTGCTCAGTGGGTTAAGGATCCAATATTGCCATGAGCTGCATGATGTAGGTTGCAGACGCAAATGGGATCTAGCATTTCTTT	C	ENSSSCG00000008513	intron_variant,feature_truncation	MODIFIER	BIRC6	protein_coding	INTRON=6/75,STRAND=-1	ESE,ESS,MBE,ncRNA hybridization regions
sv_06368	3	111307321	111307549	228	DEL	AAGGAATCTGAATGAGCTGCTTAACTTCTCTGAGACTCATGCCTTCACATGTTTAAAAAAAAAAAATTAAAGATATGATTATAAAAACATTCCTTACAGATTTACTGAGAACAAAGAGCCAACGAAAAAGACAGCTTTATACTATTCACAATGCTAAAGTCAATTATTGTTCATTTCTGTATAGTGACAGATAGATAATAATAGATAGATGATAGATAGATAGATAGAT	A	ENSSSCG00000026465	intron_variant,feature_truncation	MODIFIER	BABAM2	protein_coding	INTRON=2/10,STRAND=-1	-
sv_06434	3	114561267	114561554	287	DEL	AGGAGTTCCCGTCGTGGCACAGTGGTTAACGAATCCGACTAGGAACCATGAGGTTGCGGGTTCGGTCCCTGCCCTTGCTCAGTGGGTTAACCATCCGGCGTTGCCGTGAGGTGTGGTGTAGGTCGCAGACGCGGCTCGGATCCTGCGTTGCTGTGGCTCTGGTGTAGGCCGGTGGCCACGGCTCCGATTCGACCCCTAGCCTGGGAACCTCCATATGCCGAGGGAGCGGCCCAAGAAATAGCAAAAAAAAAAAAAAAAAAAGACAAAAAAAAAAGAAATATTTGGGGG	A	ENSSSCG00000008582	intron_variant,feature_truncation	MODIFIER	-	protein_coding	INTRON=1/7,STRAND=-1	ESE,Brd-Box (Brd),MBE,Polyadenylation Signal (PAS),C-to-U RNA editing sites
sv_06441	3	114944058	114944119	61	DEL	AGCCATAAATGGATGCCAGGCCCAGATGCGACGGGGCTGCCCAACCTGCCCCTGTGCTAATG	A	ENSSSCG00000008593	intron_variant,feature_truncation	MODIFIER	KLHL29	protein_coding	INTRON=3/12,STRAND=-1	ESE
sv_06478	3	117923399	117923537	138	DUP:TANDEM	CAGGGTAAATATAGAATGGATAAATTCATTGTGTTTGTCCATTGAGATTCTGTACAGTATTGAAAATGGAAACTGAAAGGTCTGTAATAGAACTTGGGTGAATTGTACATAAAAATTTTTTAATAATTAAAACCAAATT	CAGGGTAAATATAGAATGGATAAATTCATTGTGTTTGTCCATTGAGATTCTGTACAGTATTGAAAATGGAAACTGAAAGGTCTGTAATAGAACTTGGGTGAATTGTACATAAAAATTTTTTAATAATTAAAACCAAATTAGGGTAAATATAGAATGGATAAATTCATTGTGTTTGTCCATTGAGATTCTGTACAGTATTGAAAATGGAAACTGAAAGGTCTGTAATAGAACTTGGGTGAATTGTACATAAAAATTTTTTAATAATTAAAACCAAATT	ENSSSCG00000008600	intron_variant	MODIFIER	PUM2	protein_coding	INTRON=11/21,STRAND=1	ESE,Polyadenylation sites,Polyadenylation Signal (PAS),C-to-U RNA editing sites
sv_06534	3	121979279	121979279	52	INS	G	GAGAAGGAGAAGGGAATTCAGAAACATTTGAGGAAAGCATTGCTATGAGGGAA	ENSSSCG00000008621	intron_variant,feature_elongation	MODIFIER	NBAS	protein_coding	INTRON=14/49,STRAND=1	ESE
sv_06584	3	124185716	124186023	307	DEL	TCCAAATAACTATTTTTTTTTTTTTTTGTCTTTTGTTGTTGTTGTTATTGCTGTTGTTGTTGTTGTTGCTATTTCTTGGGCCGCTCCCACGGCATATGGAGGTTCCCAGGCTAGGGGTTGAATCGGAGCTGTAGCCACCGGCCTAAGCCAGAGCCACAGCAACGCGGGATCCGAGCAGCGTCTGCAACCTACACCACAGCTCACGGCAAAGCCGGATCGTTAACCCACTGAGCAAGGGCAGGGACCGAACCCGCAACCTCATGGTTCCTAGTCGGATTCGTTAACCACTGAGCCACGACGGGAACTCC	T	ENSSSCG00000039080	intron_variant,feature_truncation	MODIFIER	TRIB2	protein_coding	INTRON=4/4,STRAND=-1	ESE,SXL binding site,C-to-U RNA editing sites
sv_06986	4	16245635	16245962	327	DEL	TAAAAAAAGTCCTTCGTCAAAGAAATAGCAAAAAGACAAAAAAAAAAAAAAAAAAAAAAAAAAGGGAGTTCCCGTCGTGGCGCAGTGGTTAACGAATCCGACTAGGAACCATGAGGTTGCAGGTTTGATCCCTGCCCTTGCTCAGTGGGTTAACGATCTGGCGTTGCTGTGAGCTGTGGTGTAGGTTGCAGACGCGGCTCGGATCCCGCGTTGCTATGGCTCTGGCGTAGGCCGGAGGCTACAGCTCCGATTCGACCCCTAGCCTGGGAACCTCCATATGCCGCGGGAGCGGCCCAAAGAAACAGCAAAGACCAAAAAAAAAAAAAAA	T	ENSSSCG00000005987	intron_variant,feature_truncation	MODIFIER	TBC1D31	protein_coding	INTRON=11/20,STRAND=-1	acceptor,ESE,ESS,C-to-U RNA editing sites
sv_07035	4	18614324	18614616	292	DEL	ATCTTTTCATTTGTTTTTTTTGTTTGTTTGTTTTTTTGTTTTTTGTCTTTTTGCTATTTCTTGGGCCGCTCCCACGGCATATGGAGGTTCCCAGGCTAGGGGTCTAATCGGAGCTGTAGCCACCAGCCTATGCCAGAGCCACAGCAACGCGGGATCCGAGCCGCATCTGCAACCTACACCACAGCTCACGGCAATGCCGGATCGTTAACCCACTGAGCAAGGGCAGGGACCGAACCCGCAACCTCATGGTTCCTGGTCGGATTCGTTAACCACTGCGCCACGACGGGAACTCC	A	ENSSSCG00000005996	intron_variant,feature_truncation	MODIFIER	MRPL13	protein_coding	INTRON=2/6,STRAND=1	ESE,GU-rich destabilization element
sv_07184	4	31380585	31380841	256	DEL	TTTTTTAATGAATCAGGAGTTCCGTCGTGCGCGGTGTTAACGAATCGACTAGAACATGAGGTTGCGGTTCGGTCCTGCCTTGCTCAGTGGTTAACGATCCGGCATTGCCGTGACTGTGGTGTAGGTTCAGACGCGGATCGGATCCGCGTTGCTGTGCTCTGCGTAGGCTGCGCTAAGCTCCGATTGGACCCTAGCCTGGAACCTCATATGCGTGCGGAGAGCCTAGAAATAGCAAAAAGACAAAAAAAAAAAAAAAA	T	ENSSSCG00000006037	intron_variant,feature_truncation	MODIFIER	OXR1	protein_coding	INTRON=1/17,STRAND=-1	acceptor,ESE,ESS
sv_07239	4	35104932	35105308	376	DUP:TANDEM	TGCCTGGCACGTTGTAGAAGCTCAGTTTATATTCCGAGTAATAGGTAACGTTTATTGAATAACAGGCATCCTGTTAATGAAAAAATCAGCTTTCAAAATACTTGCAAACCTTCAACTGCCAAGTCTGAAAAATCCACGAGACATATTTTGGTATATTGCTTTGAATTTTAAACCAGGCTATATATCCAATGAGACAACCACGTTGGAAATGAACAGTTGAGTTTCTGAAAAGTGTGCATTGATTTCAAATAAATTATTGTATTTTCTTGTCCCTGTGTGAGATGGAGATGAGGTAGGTAGTTATTCTAAATAAATGAGAATGAGCATCAGGAAAGTAAGTCACGGGTGAGGGTGAGGGTGGGTCCGCAGCCCCCCCA	TGCCTGGCACGTTGTAGAAGCTCAGTTTATATTCCGAGTAATAGGTAACGTTTATTGAATAACAGGCATCCTGTTAATGAAAAAATCAGCTTTCAAAATACTTGCAAACCTTCAACTGCCAAGTCTGAAAAATCCACGAGACATATTTTGGTATATTGCTTTGAATTTTAAACCAGGCTATATATCCAATGAGACAACCACGTTGGAAATGAACAGTTGAGTTTCTGAAAAGTGTGCATTGATTTCAAATAAATTATTGTATTTTCTTGTCCCTGTGTGAGATGGAGATGAGGTAGGTAGTTATTCTAAATAAATGAGAATGAGCATCAGGAAAGTAAGTCACGGGTGAGGGTGAGGGTGGGTCCGCAGCCCCCCCAGCCTGGCACGTTGTAGAAGCTC…	ENSSSCG00000006059	intron_variant	MODIFIER	NCALD	protein_coding	INTRON=3/8,STRAND=1	donor,ESE,Polyadenylation sites,MBE
sv_07241	4	35274602	35274695	93	DUP:TANDEM	AGAAGAAAGCAATAGCCCTAAAACTAAATTATCATTGGTGGACCTACTTTATTTCAAACACAGATATCGTCACTAAAAATTTCCTCTAGATCTT	AGAAGAAAGCAATAGCCCTAAAACTAAATTATCATTGGTGGACCTACTTTATTTCAAACACAGATATCGTCACTAAAAATTTCCTCTAGATCTTGAAGAAAGCAATAGCCCTAAAACTAAATTATCATTGGTGGACCTACTTTATTTCAAACACAGATATCGTCACTAAAAATTTCCTCTAGATCTT	ENSSSCG00000006059	intron_variant	MODIFIER	NCALD	protein_coding	INTRON=5/8,STRAND=1	ESE,Polyadenylation Signal (PAS)
sv_07656	4	73889827	73889889	62	DEL	TTGTTCACATGTTTTCTCAAGAGATTACAGAAGGGAAAGCTAAGGAAGCTTCTGGTTATTTGC	T	ENSSSCG00000006235	intron_variant,feature_truncation	MODIFIER	TOX	protein_coding	INTRON=1/7,STRAND=1	ESE
sv_07826	4	88644219	88644272	53	DEL	CATTGCTGTGGACTTCTCAGCACATAAGAAAAAATAAATCCAATTAAACCCGTT	C	ENSSSCG00000006346	intron_variant,feature_truncation	MODIFIER	ATF6	protein_coding	INTRON=19/19,STRAND=-1	ESE, Polyadenylation Signal (PAS)
sv_07847	4	91069967	91070264	297	DEL	TGAGAACATTTTTTTTTTTTTTTTTTTTTTGTCTTTTGGTCTGTTGTTGTTGTTGTTGCTATTTCTTGGGCCGCTCCCGTGGCATATGGAGATTCCCAGGCTAGGGGTCGAATCGGAGCTGTAGCCACCGGCCTATGCCAGAGCCACAGCAACTCGGGATCCAAGCCGCGTCTGCAACCTACACCACAGCTCACGGCAACGCCGGATCGTTAACCCACTGAGCAAGGGCAGGGACCGAACCCGCAACCTCATGGTTCATAGTCGGATTCGTTAACCACTGCGCCACGACGGGAACTCC	T	ENSSSCG00000042263	intron_variant,feature_truncation	MODIFIER	-	protein_coding	INTRON=2/2,STRAND=-1	ESE,SXL binding site,Musashi binding element (MBE)
sv_07970	4	102587455	102587554	99	DEL	CAAAAAAAAAAGAAAGAAAGAAAGAAAGAAAGAAAGAAAGAAGAAAAAGAAAAGAAAAAAGAAAAAAAAAAAAAAAAAAAAAAAAAAAAAAAAAAAAAAA	C	ENSSSCG00000006726	intron_variant,feature_truncation	MODIFIER	-	protein_coding	INTRON=3/13,STRAND=1	ESE,C-to-U RNA editing sites
sv_07988	4	103498496	103498560	64	DEL	ACCAGGAAAAAATAAAATAAAGATAAAGGTAGTGTGTTGTCTAGTACATGGAAACGGATGAGCTT	A	ENSSSCG00000006731	intron_variant,feature_truncation	MODIFIER	VTCN1	protein_coding	INTRON=3/7,STRAND=1	Musashi binding element (MBE),Polyadenylation_site
sv_08040	4	106793934	106794024	90	DEL	GACCCCTCCCCCCCTTTTATTTTTCCACAGCCGCACCTGTAGCATATGAAAGTTCCCAGGCCAGGGGTTGAGTTGGAGCTGTGGCTGTGGC	G	ENSSSCG00000030154	intron_variant,feature_truncation	MODIFIER	RSBN1	protein_coding	INTRON=4/6,STRAND=1	ESE
sv_08053	4	107718086	107718145	59	DEL	TAGGAGGTGTCTAAGAATCAATGCTGTCATCTCTCTGGCTAGGGAAGGAGCTGAAGGTCA	T	ENSSSCG00000042304	intron_variant,feature_truncation	MODIFIER	-	protein_coding	INTRON=1/11,STRAND=-1	ESE
sv_08133	4	111962243	111962562	319	DEL	TCTCGTTAGTGTTGTAGTTTTTTTTTTTGTTTTGTTTTGTTTTGTTTTTGTCTTTTTGTCTTTTGTCTTTTGTTGTTGTTGCTACTTCTTGGGCTGCTCCCGCAGCATATGGAGGTTCCCAGGCTAGGGGTCCAATCGGAGCTGTAGCCGCCGGCCTACGCCAGAGCCACAGCAACGCGGGATCCGAGCCGCGTCTGCAACCTACACCACAGCTCACGGCAACGGCGGATCGTTAACCCACTGAGCAAGGGCAGGGACCGAACCCGCAACCTCATGGTTCTTAGTCGGATTCGTTAACCACTGCGCCACGACGGGAACTC	T	ENSSSCG00000023187	intron_variant,feature_truncation	MODIFIER	VAV3	protein_coding	INTRON=2/27,STRAND=1	acceptor,ESE,SXL binding site,Musashi binding element (MBE)
sv_08245	4	117999908	118000197	289	DEL	CGCCAGATCCCTAACCTGCTGAGCGAGGCCAGGGATCAAACCTGCAACCTCATGGTTCCTAGTCGGATTCATTTTTGCTGCGCTAAGATGGGAACTCCTGCTTTATTGATTTTTGTTGTTTTTGTTGTTTTTTTTTTTGGTCATTTTGCTTTTTCTAGGGCCACACCTGCAGCACATGGAGGTTCCCAGGCTAGGGGTTGAAACAGAGCTGTAGCCACTGGCCTACGCCAGAGCCACAGCAACACGGGATCTGAGCTGCGTCTGCAACCTACACCACAGCTCACAGCAAT	C	ENSSSCG00000028821	intron_variant,feature_truncation	MODIFIER	SASS6	protein_coding	INTRON=1/15,STRAND=1	acceptor,ESE,SXL binding site,C-to-U RNA editing sites
sv_08260	4	118419436	118419523	87	DEL	ACAAATTTTCTAAATCCCATTTTATTTAGCAACTTTAGTCTTCTTTCCCAGCCTTGAAACAACTTCAGACCAATCTCTAAATAGAATC	A	ENSSSCG00000006873	intron_variant,feature_truncation	MODIFIER	FRRS1	protein_coding	INTRON=18/22,STRAND=1	ESS,Polyadenylation Signal (PAS),C-to-U RNA editing sites
sv_08382	4	124909154	124909780	626	DEL	ATGCAGGTTTGATCCCTGGCCTTGCTCAGTCAGTTAAAAATCTGGCATTCCCGTGAGCTGCGGTGTATGTGGCAGATGTGGCTCAGATCCAGTGCTGCTGTGGCTGTGGTGTAGGTCTGCAGCTGCAGCTCTGATTTGACCCCTAACCTGAGAATTTCCATATGCTGCTGGCCCTAAAGAGACAAAAAAAAAAAAAAAAAAAAAAAAGGATCCAGCATTATCACTGCTGTGGTTCGGGTTTCATACCGGGCCTGGGAACCTCCACATATTGTGGGCATGGCCAAAAAAAGTGCTTTAAAAAAAATGGGCCTAAGATTTAACAGAAATATCATAAGATACGCAAATAGCCAATAAGTATACGAGATGATAAAACTGCTAGTGACCAGGGCAATGTAAATT…	A	ENSSSCG00000035196	intron_variant,feature_truncation	MODIFIER	BTBD8	protein_coding	INTRON=4/16,STRAND=-1	ESE
sv_08414	4	127269167	127269477	310	DEL	AATGAATGTTTTTTTTTTTTTTTTTTGTCTTTTGTCTTTTGTTGTTGTTGTTATTGTTGTTGTTGTTGTTGCTATTTCTTGGGCCGCTCCCGCGGCATATAGAGGTTCCCAGGCTAGGGGTCCAATCGGAGCTGTAGCCACCGGCCTACGCCAGAGCCACAGCAACGTGAGATCCGAGCCGTGTCTGCAACCTACACCACAGCTCACGGCAAGGCCGGATCGTTAACCCACTGAGCAAGGGCAGGGACCGAACCCGCAACCTCATGGTTCCTAGTCGGATTCGTTAACCACTGCGCCACGACGGAAACTCC	A	ENSSSCG00000030801	intron_variant,feature_truncation	MODIFIER	-	protein_coding	INTRON=10/16,STRAND=1	donor,ESE,SXL binding site,C-to-U RNA editing sites
sv_08475	5	1417504	1417588	84	DEL	GCCGCGGCCACTCTGCTCTGAGGTCTGGGCAGCACAGAAGCGTCTGCACCAGGTGAGGTGTGGCCACCTGACGCCTCTGATGTGT	G	ENSSSCG00000034776	intron_variant,feature_truncation	MODIFIER	TAFA5	protein_coding	INTRON=3/3,STRAND=-1	ESE
sv_08526	5	4816235	4816465	230	DEL	GTGCTGCAGCTGCCTGGTTGGTGGCCGGGAGCAGGCGCTGGACCTGGAGGCAGGGTCGTGGACCAGGCTGAGCCTCGGTGCTGACAGCTGAGTCCCTGCAGAGCTGGGCACCTGGCAGGGCTCAGCGAACACTCAGAAACCCACCGAGGAGGCTGTGAGAGCTGCTCCCCCCAGCTCCCCAGACAGCGGGCATCCACTCAGTGTCAGGTGCTCAGGGCACAGTGGCACAAA	G	ENSSSCG00000039522	intron_variant,feature_truncation	MODIFIER	SHISAL1	protein_coding	INTRON=4/4,STRAND=1	ESE,ssc-miR-4335
sv_08616	5	9349445	9349445	65	INS	C	CTGCTCGGGGCGCTGACTAATGGCTGCTTGGTGTGAGACCTCTTCAAGCCAGGAGCAGAATGTCTT	ENSSSCG00000000097	intron_variant,feature_elongation	MODIFIER	TOMM22	protein_coding	INTRON=4/8,STRAND=-1	-
sv_08623	5	9690128	9690182	54	DEL	CCCGATTCTCCTGACAACCCTGGGAGATAATAGCCAGAGAAGTCAATACAGTAGT	C	ENSSSCG00000030165	intron_variant,feature_truncation	MODIFIER	MAFF	protein_coding	INTRON=1/2,STRAND=-1	Musashi binding element (MBE),Polyadenylation Signal (PAS)
sv_08629	5	9934471	9934531	60	DEL	GAACTGCTATTTTGTAAAAGTAACAAGTGACACGCATCACCCATTGCTTTTGGTCGAGAAC	G	ENSSSCG00000000118	intron_variant,feature_truncation	MODIFIER	MICALL1	protein_coding	INTRON=11/16,STRAND=-1	ESE
sv_08649	5	11401676	11401992	316	DEL	TAAGAAACTTGCCCTTGGAGTTCCCGTCGTGGCTCAGTGGTTAACGAATCCGACTAGGAACCATGAGGTGGCGGGTTCGATCCCTGGCTTTGCTCAGTGGGTTAAGGATCTGGCATTGCCGTGAGCTGTGGTGTAGGTCGCAGACGCGGCTCGGATCCCGCATTGCTGTGGCTCTGGCATAGGCTGGCAGCTACAGCTCCGATTAGACCCCTAGCTGGGGAACCTCCATATGCCCCAGGAGCAACCCAAGAAATGGCAAAAAGACAAAAATAAATTAATTAATTAATTTAAAAAATAAAAATAAAAACATTATACAA	T	ENSSSCG00000000145	intron_variant,feature_truncation	MODIFIER	-	protein_coding	INTRON=2/6,STRAND=1	ESE,Polyadenylation Signal (PAS),C-to-U RNA editing sites,functional RNA sequences
sv_08667	5	12390069	12390386	317	DEL	TATACAGCAGTTTTTTTTTTGTTGTTTTTTTTTGTTTTTTTTTTTTTTGTCTTTTGTTGTTGTTGTTGCTGTTGTTGCTATTTCTTGGGCCGCTCCCGCGGCATATGGAGGTTCCCAGGCTAGGGGTCTAATTGGAGCTGTAGCCACCGGCCTACGCCAGAGCCACAGCAACGCAGGATCCGAGCCGCGTCTGCGACCTACACCACAGCTCACGGCAACGCCGGATCGTTAACCCACTGAGCAAGGGCAGGGACCGAACCCGCAACCTCATGGTTCCTAGTCGGATTTGTTAACCACTGCGCCACGATGGGAACTCCA	T	ENSSSCG00000040453	intron_variant,feature_truncation	MODIFIER	SYN3	protein_coding	INTRON=8/33,STRAND=1	ESE,SXL binding site,C-to-U RNA editing sites
sv_08692	5	13964928	13964998	70	DEL	CTGTGAGTGTGGCCCTAAAAACACAAAAGACCAAAAAAAAAGTACAAATAGCTAATTACATAATAATGCTA	C	ENSSSCG00000024881	intron_variant,feature_truncation	MODIFIER	TCP11L2	protein_coding	INTRON=3/33,STRAND=-1	ESE
sv_08815	5	21633772	21633772	124	INS	A	ATCTCTAGAGATGGGGAAGGAGCCACGGGATTTAGACGGCCTGAAATGTTTAGAGTCAGTAGTTTAAGACAGTTACTTTAAGGAGTCCCTTGTGGCCCAGTGGGTTAAGGATCTAGTGTTGTCAC	ENSSSCG00000000385	intron_variant,feature_elongation	MODIFIER	SLC39A5	protein_coding	INTRON=5/12,STRAND=1	ESE,Musashi binding element (MBE),C-to-U RNA editing sites
sv_09135	5	41491928	41491928	107	INS	C	CATGACCACTTATGATTTAGCCATAGCCTTTCTAGCCATGCTCATTGCACACCTCCAGGCACCCTGCAGTCCAGACACACTCTGTTACGTCCAGTTAACCTTCTTTTT	ENSSSCG00000000528	intron_variant,feature_elongation	MODIFIER	PKP2	protein_coding	INTRON=8/13,STRAND=1	ESE
sv_09137	5	41565536	41565536	56	INS	T	TGAGGAAAAAGAGTTGTAAGTAAGTCTTGATGATTATGAAAGCCAATCTGCAAGCCC	ENSSSCG00000027429	intron_variant,feature_elongation	MODIFIER	YARS2	protein_coding	INTRON=2/5,STRAND=1	-
sv_09179	5	44458353	44458353	62	INS	G	GAAGTCTAATTTCCTTTTAAATTCTATGTACACCACCTTAAGCTATGATAAAGACGTGAGGCT	ENSSSCG00000000541	intron_variant,feature_elongation	MODIFIER	FAR2	protein_coding	INTRON=1/11,STRAND=-1	ESE,Polyadenylation Signal (PAS)
sv_09190	5	45473420	45473420	87	INS	A	AATGTTCCACAGAACAAATCTGACTATCTTCCACAGAAGAAATCTGACTATCCTGAGACCATCATGCTATAAGGTATCACCAAAACAG	ENSSSCG00000024232	intron_variant,feature_elongation	MODIFIER	CCDC91	protein_coding	INTRON=1/14,STRAND=-1	ESE
sv_09282	5	53891021	53891122	101	DEL	TAATTATATTATGCCCAGAGCTAACAGAGGGACTGGTTTGCCTCTTTGTCGTCTTTTTTTTTTTTTTTTTTAGGGCCGTGCCCATGGCGCACAGAGGTCCCC	T	ENSSSCG00000000588	intron_variant,feature_truncation	MODIFIER	PLEKHA5	protein_coding	INTRON=5/27,STRAND=-1	ESE,SXL binding site
sv_09408	5	62936490	62936791	301	DEL	TGGGAACTCCTGAAAATGGAATCTTTTTTTTTTTTTTTTTTTTTTTGTCTTTGTTGTTGTTGTTGTTGTTGCTATTTCTTGGGCCGATCCCTCGGCATATGGAGGTTCCCAGGCTAGGGGTTGAATCGGAGCTGTAGCCACTGGCCTATGCCAGAGCCACAGCAATGCGGGATCCGAGCCGCGTCTGCAACCTACACCACAGCTCATGGCAACGCCGGATCGTTAACCCACTGAGCAAGGGCAGGGACCGAACCCGCAACCTCATGGTTCCTAGTCGGATTCGTTAACCACTGCGCCACGAC	T	ENSSSCG00000040403	intron_variant,feature_truncation	MODIFIER	NANOG	protein_coding	INTRON=2/3,STRAND=1	acceptor,ESE,SXL binding site,C-to-U RNA editing sites
sv_09701	5	79832933	79833069	136	DEL	AGGGGGATATGGGAGGAGGTGAGAGACAGATGAAGAGACAAATCAGCAGCAGCAGAGACTCAGGCCAGAGACAGCGATGGGAAGTCATAGCCTAATCCTTGACTCCTTATTCCCAGGGGAGTATGGGGGGGAGATGG	A	ENSSSCG00000000837	intron_variant,feature_truncation	MODIFIER	CHST11	protein_coding	INTRON=2/2,STRAND=-1	ESE
sv_10022	5	96862373	96862428	55	DEL	GTAAAAAAAACTCAACTTATAAAACTCAACAGTAAACAACTTAAAAACTCAACTTA	G	ENSSSCG00000000934	intron_variant,feature_truncation	MODIFIER	LRRIQ1	protein_coding	INTRON=23/26,STRAND=-1
sv_10256	6	9376732	9376959	227	DEL	GGCCCGGCACACAACAGGGGCCCAAATAAGCATGCGTGGAATTTCTGTAAAGACTGGGGCCAACCTATAATGAGCAGATCCAGCCATCTCTTCCTTCAGGTGTTCAATTACTATTTATTAAGTGCCTACGGCATCTACTAAGGGTCAGGGAAGGATCCTGGTCCTCAGCACTCAAGGACCCAAAGGAACAAAACCCTGTGCCTTGAGAGCATCGCCTTCCAGCAGGAA	G	ENSSSCG00000027415	intron_variant,feature_truncation	MODIFIER	WWOX	protein_coding	INTRON=8/8,STRAND=-1	acceptor,ESE
sv_10325	6	12487750	12487935	185	DEL	AACCCACTGAGCAAGGCCAGGGACCGAACCCGCAACCTCATGGTTCCTAGTCGGATTCGTTAACCACTGCGCCACGACGGGAACTCCTCAACAGTATTTATAAAAGCCAGGATACGGAAACAACCTAAGTATCCACTGATGGAGGAAAAGATAAAGAAATTGGGGCAAATACACACACACACACAC	A	ENSSSCG00000022668	intron_variant,feature_truncation	MODIFIER	ZFP1	protein_coding	INTRON=3/4,STRAND=-1	ESE,ESS,Polyadenylation Signal (PAS),C-to-U RNA editing sites
sv_10400	6	15792514	15792572	58	DEL	GAAGAAAAATGACACTGAATTTCCATATAATTCAGCTATTCGTAAAAAAAAAAAAAAAA	G	ENSSSCG00000002752	intron_variant,feature_truncation	MODIFIER	ZFHX3	protein_coding	INTRON=5/10,STRAND=-1	ESE
sv_10557	6	27235116	27235116	53	INS	G	GGCATCCCCTGGCCATGGGGGCCCAACCTGACCAGTGAGACCTGAGGGAGGTTT	ENSSSCG00000038053	intron_variant,feature_elongation	MODIFIER	TK2	protein_coding	INTRON=6/10,STRAND=-1	-
sv_10630	6	34840362	34840523	161	DEL	GATTCAGTCCCTGGCCTGGGAACTTCCATATGGTATGGATGGAGCCATAAAATTTAAAAAAAAGCAACCAATCCAAAGCAAAAAACAAAAGAAATTGGGCTTTTTCTCAAAGAAAATATCTAATTTATTTTAAGGACATAATAAGCCTAAGTCATTTATGTC	G	ENSSSCG00000036632	intron_variant,feature_truncation	MODIFIER	-	protein_coding	INTRON=7/10,STRAND=1	Polyadenylation sites,C-to-U RNA editing sites
sv_10737	6	44037692	44037873	181	DEL	CGAATTGGAGCTGTAGCCACCGGCCTACGCCAGAGCCACAGCAACAAGGGATCCGAGCCGCGTCTGTGACCCACACCACAGCTCACGGCAACACCGGATCCTTAACCCACTGAGCAAGGCCAGGGATCGAACCCCAAACGTCATGGTTCCTAGCCGGATTCGTTTCCGCTGCGGGACGACGG	C	ENSSSCG00000002873	intron_variant,feature_truncation	MODIFIER	GPI	protein_coding	INTRON=13/29,STRAND=1	ESE,ESS
sv_10761	6	45851221	45851279	58	DEL	CGGCAATGCCGGATCCTTAACCTACTGAGCAAGGTGAGGGATCGAACCCACAACCTCAT	C	ENSSSCG00000002930	intron_variant,feature_truncation	MODIFIER	ZNF260	protein_coding	INTRON=3/5,STRAND=1	-
sv_10769	6	46117628	46117926	298	DEL	AAAGAGCTGCATTTTAGCTTTTTTTTTTTTTTTTTTTTTTGTTGTTGTTGTTGTTGTTGCTATTTCTTGGGCCGCTCCCGAGGCATATGGAGGTTCCCAGGCTAGGGGTTGAATTGGAGCTGTAGCCACCGGCCTACGCCAGAGCCACAGCAACGCGGGATCCGAGCCGTGTCTGCAACCTACACCGCAGCTCACGGCAACGCCGGATCGTTAACCCACTGAGCAAGGGCAGGGACCGAACCCGCAACCTCATAGTTCCTAGTCGGATTCGTTAACCACTGCGCCACGACGGGAACTCC	A	ENSSSCG00000002935	intron_variant,feature_truncation	MODIFIER	-	protein_coding	INTRON=2/7,STRAND=-1	ESE,SXL binding site,Musashi binding element (MBE)
sv_10787	6	47047267	47047267	88	INS	C	CTAGCCCAGGAACTTCATATGTTGCAGGAGTGACTCGAAAAAGAAAAAGCCCAAGACTGCCCTGCTTATGATAAGAGAGATTTGTTTGT	ENSSSCG00000002950	intron_variant,feature_elongation	MODIFIER	-	protein_coding	INTRON=4/22,STRAND=1	ESE,C-to-U RNA editing sites
sv_10788	6	47116333	47116614	281	DEL	TAAGGTTAATCACCGTTGGAGTTCCCGTCGTGGTGCAGTGGTTAACGAATCCGACTAGGAACCATGAGGTTGCGGGTTCGGTCCCTGCCCTTGCTCAGTGGGTTAACGATCTGGCGTTGCCGTGAGCTGTGGTGTAGGTTGCAGATGCGGCTCGGATCCCACGTTGCTGTGGCTCTGGTGTAGGCCGGTGGCTACAGCTCCGATTTGACCCTTAGCCTGGGAACCTCCATATGCCGCTGCAGTGGCCCAAGAAATAGCAAAAAGACAAAAAAAAAAAAAAAA	T	ENSSSCG00000002950	intron_variant,feature_truncation	MODIFIER	-	protein_coding	INTRON=5/11,STRAND=1	ESE,ESS,C-to-U RNA editing sites
sv_10837	6	57003074	57003741	667	DEL	CTAACCCACTGAGCAAGGCCAGGGCTCGAACCCGGGTTCTCATGGAACTCCAAGAAGGCTGTGTTTTGAAGATAGAAAATGCCTTGTCAACACTGACAAACTTTGACTTCCCTAGTTCCTTAGGTATTATATCCATGTATTTCTTTTTTTTTTTTTTTTTTTTTTTTTTTCTTTTCTTTTTAGGGCCATACCTGCAGCACATGGAAGTCCCCAGGCTAGGAGTTGAATTGAAGCTGTAAGCTGCCAGCACACACCTCAGCCATGCCAGATCCAAGTGACATCTGTGACCTGCACCACATCTTGTGGCAATGCCAGATCCTTATTATAACCCACTGAGCATGGCCAGGTATCATGGCCTGCATCCTTACAGACACTGTGTCAGATTTTTAACCCACTGAG…	C	ENSSSCG00000027741	intron_variant,feature_truncation	MODIFIER	-	protein_coding	INTRON=1/6,STRAND=1	acceptor,donor,ESE,ESS,SXL binding site
sv_11024	6	81073135	81073135	95	INS	T	TCAAAGACAGACTCCAGGACTCTATAAAAAGATTGTCAAGATCCAGGAGAAAGATCCTGGGATCCTGTAGAGACCCAAGTCCCTCCCCTGAAGAGA	ENSSSCG00000003532	intron_variant,feature_elongation	MODIFIER	LUZP1	protein_coding	INTRON=1/3,STRAND=-1	C-to-U RNA editing sites
sv_11062	6	84931694	84932116	422	DEL	CCCAGGCTAGGGGTCGAATCGGAGCTGTAGCCACTGGCCTACGCCAGAGCCACAGCAACTCGGGATCCAAGCCGCGTCTGCGACCTATACCACAGCTCACGGCAACGCCGGATCGTTAACCCACTGAGCAAGGGCAGGGACCGAACCTGCAACCTCATGGTTCCTAGTCGGATTCGTTAACCACTGCGCCATGACGGGAACTCCTGATTATTCATTTTTATAGGAGAAATAATTTGTACACTCTGCTAAGGATTAGGTTATGGGTAGTTACCCAGCGATCACCTAGAAGATTTTGCTCAATCCCTATTTCTTAGCAGAGTTAGAGGCTATTAGCATATCTGTGGGTTTTTTGTTTTTTGGAGGGGTTTTTTTGTTTTTGTTATTTTTGGTTTTTACGGC…	C	ENSSSCG00000024927	intron_variant,feature_truncation	MODIFIER	STX12	protein_coding	INTRON=1/8,STRAND=1	ESE,Musashi binding element (MBE),C-to-U RNA editing sites
sv_11079	6	85809783	85810057	274	DEL	GCGGAGTTCCCGTCGTGGCGCAGTGGTTACCGAAACCGACTAGGAACCATGAGGTTGCGGGTTCGATCCCTGCCCTTGCTCAGTGGGTAACGATCTGGCGTTGCTGTGAGCTGTGGTGTAGGTCGCAGACAAGGCTCAGATCCGGTGTTGCTGTGGCTCTGGTGTAGGCGGGTGGCTACAGCTCCGATTCAACCCCTAGCCTGGGAACCTCCATATGCCGCGCAGGAGTGGCCCCAGAAAAGACCAAAAAAAAAAAAAAAAAAAAAAAAGATGTA	G	ENSSSCG00000027401	intron_variant,feature_truncation	MODIFIER	OPRD1	protein_coding	INTRON=1/2,STRAND=1	donor,ESE,C-to-U RNA editing sites,functional RNA sequences
sv_11098	6	87349423	87349507	84	DEL	GCTGGGTCCTAGGACACTGGAGCCAGCGACTTGCCAGAGGCCCCCAACTCGGCCCGTGGGAAAGACAGGGGTTGAATGGCATCTA	G	ENSSSCG00000022554	intron_variant,feature_truncation	MODIFIER	MATN1	protein_coding	INTRON=1/7,STRAND=-1	ESE,ssc-miR-149
sv_11119	6	89131365	89131365	54	INS	G	GTCTTCTCACCCATCAGCAGTATGACTTCTGTGTACAAAGCACTGTACTGATGGT	ENSSSCG00000022801	intron_variant,feature_elongation	MODIFIER	S100PBP	protein_coding	INTRON=4/6,STRAND=1	-
sv_11222	6	98592597	98592597	59	INS	A	AAGGCTGAGCAATGAGATGTCTGGGGGGATAAAGACCCTGAACAGCACCAACAAATTCCC	ENSSSCG00000003680	intron_variant,feature_elongation	MODIFIER	RALBP1	protein_coding	INTRON=1/9,STRAND=-1	ESE,Alcohol dehydrogenase 3UTR downregulation control element (ADH_DRE),Polyadenylation Signal (PAS)
sv_11255	6	102979051	102979354	303	DEL	CAGGAGTTCCCGTCGTGGCGCAGTGGTTAACGAATCCGACTAGGAACCATGAGGTTGCGGGTTCGGTCCCTGCCCTTGCTCAGTGGGTTAACGATCCGGCGTTGCCGTGAGCTGTGGTGTAGGTTGCAGACGCGGCTCGGATCCTGCGTTGCTGTGGCTCTGGCGTAGGCCGGTGGCTACAGCTCCGATTCGACCCCTAGCCTGGGAACCTCCATATGCCGCGGGAGCGGCCAAGAAATAGCAACAATAACAACAACAACAACAACAAAAAATAAAAATAAAAAATAAAATAAAATAAAAGTTT	C	ENSSSCG00000003690	intron_variant,feature_truncation	MODIFIER	DLGAP1	protein_coding	INTRON=2/10,STRAND=1	ESE,ESS,Polyadenylation Signal (PAS),C-to-U RNA editing sites,ncRNA hybridization regions
sv_11290	6	106668341	106668589	248	DEL	CTGGTAGTAAGATGCAGGGGCCCAGTACTTGACAGAATATCCCCAGCTTCTCCCACTTTGCCCCCTTCACAGCCCTTCCCTCCGGCTGTCACCTGTGGGGCAGCTCATCTCTGCTGCCCAGCCAGCAAGGCCGGAGAGTGGCTATGAACAGGGGTCAGGCAGCATGAGCCCTGCAGCCAAAGAGAGTGTGGCCTCACGCTTCACCTCTGAGAACAATCTGTGTGCTGGAAGGGAACCAGGAGGGGTGGG	C	ENSSSCG00000003699	intron_variant,feature_truncation	MODIFIER	GREB1L	protein_coding	INTRON=24/33,STRAND=1	ESE,ESS,Musashi binding element (MBE)
sv_11310	6	109029392	109029665	273	DEL	CCAGGAGTTCCCGTCGTGGCACAGTGGTTAACGAATCCGACTAGGAACCATGAGGTTGCGGGTTCGATCCCTGCCCTTGCTCAGTGGGTTAACGATCCGGCATTGCCGTGAGCTGTGGTGTAGGTTGCAGACGCGGCTCGGATCCTGCGTTGCTGTGGCTCTGGCGTAGGCCGGTGGCTACAGCTCCGATTGGACCCCTAGCCTGGGAACCTCCATATGCCGCAGGAGCGGCCCAAGAAATAGCAACAACAACAACAAAAAGACAAAAAGA	C	ENSSSCG00000003712	intron_variant,feature_truncation	MODIFIER	OSBPL1A	protein_coding	INTRON=18/27,STRAND=-1	acceptor,ESE,ESS,Polyadenylation Signal (PAS),C-to-U RNA editing sites,functional RNA sequences,ncRNA hybridization regions
sv_11416	6	120547420	120547600	180	DEL	CTTCCTGACCAGAACTTCTTTCTCACAACAAAAGCCCCGGCCAGCTTTCTCCCTGGAGTAGAATTTTTTAGGGGCAGACCTAGCCTTAAGGCATGATGGCCAAGATCTTAGACTCTGGAGCCAGAGAGATTTGAGTTCAGATCCAGTTCCACCACTAACCAGCTGTGTGACTTCTCCTAAG	C	ENSSSCG00000027935	intron_variant,feature_truncation	MODIFIER	FHOD3	protein_coding	INTRON=23/28,STRAND=1	ESE,Terminal Oligopyrimidine Tract (TOP),C-to-U RNA editing sites
sv_11417	6	121176013	121176013	54	INS	C	CAAATAACAAAATATTCCTCTGTTCTGTGTTATGGCAATTGAAAGGAGAGTGACA	ENSSSCG00000003748	intron_variant,feature_elongation	MODIFIER	CELF4	protein_coding	INTRON=2/9,STRAND=-1	ESS,C-to-U RNA editing sites
sv_11604	6	137456374	137456498	124	DEL	TACATGTGTCTTTTTTTTTTTTTTTTTTTTTTTATTTTCCCACTGTACAGCAAGGGGGTCAGGTCATCCTTAGATGTATACATTGCAGTTACAGTTTTTTCCCCCACCCTTTCTTCTGTTGCGAC	T	ENSSSCG00000003775	intron_variant,feature_truncation	MODIFIER	MSH4	protein_coding	INTRON=11/21,STRAND=-1	ESE,SXL binding site
sv_11618	6	138832958	138833582	624	DEL	TAAGAGTCCCTTCGACCCCGCAATCCCACTCTTGGGCATCTATCCAGACAAAACTCTACTTAAAAGAGACACGTGCACCCGCATGTTCATTGCAGCACTATTCACAATAGCCAGGACATGGAAACAACCTAAATGTCCGTCGACGGAGGATTGGATTCGGAAGATGTGGTATATATACACAATGGAATACTACTCAGCCATAAAAAAGAACGACATAATGCCATTTGCAGCAACATGGATGGAACTAGAGAATCTCATCCTGAGTGAAATGAGCCAGAAAGACAAAGACAAATACCATATGATATCACTTATAACTGGAATCTAATATCCAGCACAAATGAACATCTCCTCAGAAAAGAAAATCATGGACTTGGAGAAGAGACTTGTGGCTGCCTGATG…	T	ENSSSCG00000040109	intron_variant,feature_truncation	MODIFIER	-	protein_coding	INTRON=9/28,STRAND=-1	ORF,acceptor,ESE,ESS,Polyadenylation Signal (PAS),ncRNA hybridization regions
sv_11753	6	147109015	147109278	263	DEL	GAAAAACCTAAGGGGGGAGTTCCCATCGTGGCGCAGCGGTTAACGAATCCGACTAGGAACCATGAGGTTGCAGGTTCGATCCCTACCCCTGCTCAGTGGGTTAAGGATCCGGCGTTGCTGTGAGCTGTGGTGTAGGTCACAGATGCTGTGGCTCTGGCGTAGGCCGGCGGCTACAGCTCCAATTAGACCCCTAGCCTGGGAACCTCCATATGCCACGGGAGTGGCCCAAAAAAATAGCAAAAAGCCAAAAACAAAAAACAAAAA	G	ENSSSCG00000003807	intron_variant,feature_truncation	MODIFIER	DNAJC6	protein_coding	INTRON=1/18,STRAND=-1	ESE,ESS,C-to-U RNA editing sites
sv_11779	6	148337406	148337584	178	DUP:TANDEM	ACACTTTGAAGTATATTTTTGAAATCTTATGCATGTCCACTATTACCATAGCTTGGAAAAGAATTATAACATGTACAGAAGGACGCAAGGACACATATTTTTCTTTTTTTGGTTTGAGTTTGACCATCAAACTAAATATCCTGGGCAGATATAATAATTAATGAATTATGTGACTAGTA	ACACTTTGAAGTATATTTTTGAAATCTTATGCATGTCCACTATTACCATAGCTTGGAAAAGAATTATAACATGTACAGAAGGACGCAAGGACACATATTTTTCTTTTTTTGGTTTGAGTTTGACCATCAAACTAAATATCCTGGGCAGATATAATAATTAATGAATTATGTGACTAGTACACTTTGAAGTATATTTTTGAAATCTTATGCATGTCCACTATTACCATAGCTTGGAAAAGAATTATAACATGTACAGAAGGACGCAAGGACACATATTTTTCTTTTTTTGGTTTGAGTTTGACCATCAAACTAAATATCCTGGGCAGATATAATAATTAATGAATTATGTGACTAGTA	ENSSSCG00000003811	intron_variant	MODIFIER	ROR1	protein_coding	INTRON=7/8,STRAND=-1	ESE,Polyadenylation Signal (PAS)
sv_11783	6	148486408	148486821	413	DEL	CGCGGCTCGGATCCCGCGTTGCTGTGGCTCTGGCGTAGGCTGGCGGTTACAGCTCTGATTGGACCCCTAGCCTGGGAACCTGCAGATGCCGTGGGAGCGGCCCTAGAAAAGGCAAAAAGACAAAAAAAAAAAAAAAAAAGTAAAACAAGTTGTAGTATGGAGACATCCAATCCATTTTTACAGCCCTCACAACACTAGCAGTAAAGAATAGTACGATAAAAGCTTATCAATGTGTCACTTTTATTTATTGAGTTTTCTTATTTTTGTTTTATTTAGGCAAAATTCACATAACATGCGATGAACCTTTTTTTTTCAGGGCCACACCTGTGGCATATGGAAGTTCCCAGGCTAGGGGTCGAATCAGGGTTGCAACTGCTGGCTATACCACAGCCACAGCAA…	C	ENSSSCG00000003811	intron_variant,feature_truncation	MODIFIER	ROR1	protein_coding	INTRON=2/8,STRAND=-1	ESE,UNR binding site,Musashi binding element (MBE),C-to-U RNA editing sites,long stems,ssc-miR-4331
sv_11808	6	149630210	149630516	306	DEL	TCTGTATGCTTGAAATTTTTTTTTTTTTTTTTGTCTTTTGTCTTTTTGTTGTTGTTGTTGTTGTTGTTGCTATTTCTTGGGCCGCTCCCGCGGCATATGGAGGTTCCCAGGCTAGGGGTCAATCGGAGCTGTAGCCACCGGCCTACGCCAGAGCCACAGCAATGCGGGATCCGAGCCGCGTCTGCAACCTACACCACAGCTCACGGCAACGCCGGATCGTTAACCCACTGAGCAAGGGCAGGGACCGAACCCGCAACCTCATGGTTCCTAGTCGGGTTCGTTAACCACTGCACCACCACGGGAACTC	T	ENSSSCG00000003816	intron_variant,feature_truncation	MODIFIER	ATG4C	protein_coding	INTRON=9/11,STRAND=-1	ESE,SXL binding site,RNA C-to-U editing site
sv_11865	6	153121733	153121893	160	DEL	TAAATTCTGGGGAATCTAACATACAGCATGGTGATTATAGCTAAGAACACTGCACCATATACCTGAACGTTGTTAAGGGACATAAGGGTATCAGTTCAACACAATTCGCACCTTATACTTACACAATGTCACAGGTCAATCAGATCTCAATAAACCTGGGA	T	ENSSSCG00000003828	intron_variant,feature_truncation	MODIFIER	FGGY	protein_coding	INTRON=2/12,STRAND=-1	ESE,Polyadenylation Signal (PAS)
sv_11899	6	155277614	155277666	52	DEL	GTCGGATTAATTAACCACTGAGCCACAAAGGGAACTCCTTTATTTATTTGTTT	G	ENSSSCG00000003833	intron_variant,feature_truncation	MODIFIER	DAB1	protein_coding	INTRON=4/12,STRAND=1	-
sv_12103	6	165717797	165717797	50	INS	C	CTTTACTTGATTTTTACAGGTTTGCCAAATCATTCAGTTTTTGAACTCAGT	ENSSSCG00000028097	intron_variant,feature_elongation	MODIFIER	GPBP1L1	protein_coding	INTRON=9/19,STRAND=1	ESE
sv_12129	6	166288631	166288631	95	INS	T	TCCCAACCTTGTGGTTCCTAGTTGGATTCTTTTCTGCTGCGCCACAACGGGAACTCCAGAAAACTCACTTTAAAGTGAAAGTAACCCAACTAGGAA	ENSSSCG00000003921	intron_variant,feature_elongation	MODIFIER	ZSWIM5	protein_coding	INTRON=4/12,STRAND=1	ESE,C-to-U RNA editing sites
sv_12131	6	166363129	166363766	637	DEL	AGCTGCCGGCCTGCACCACAGCTCCAGCAATGCAGGATCCGAGCTGCGTCTGCGACCTACACCACAGCTCACGGCAACGCCGGATCCTTAACCCACTGAGCAAGGCCAGGGATCGAACCTGCAACCTCAGGGTTCCTGGTCGGATTCGTTTCTGCTGCGCCACGACGGGAGCTCCCCACCTCAGCGTTTTACCTAGAGTATGTTCTCTAGGGACTTTTGTTGGTCTTGAATTCATCCTGACCCACCTTAGAGGCCATCCCTTCCAGGAAGCCTTCCTTAATTCATCATTTCCATGTCTCATTTCTCCATGTTACATTTCTTAAGAATAGGGACCATGTTTAGTTCATTTTTGAATTCTCAGTGCCTCTTTGTCCTTTATATATTAAATGTATTTGTATC…	A	ENSSSCG00000029808	intron_variant,feature_truncation	MODIFIER	EIF2B3	protein_coding	INTRON=2/10,STRAND=1	ORF,donor,ESE,ESS,Musashi binding element (MBE),
sv_12160	6	168589056	168589056	57	INS	A	AGCCAAGGCGAAAATGAAGAAAATTAGCTCAGACACACACACACACACACGCACACAC	ENSSSCG00000023920	intron_variant,feature_elongation	MODIFIER	P3H1	protein_coding	INTRON=11/11,STRAND=1	ESE,C-to-U RNA editing sites
sv_12184	7	1614959	1615260	301	DEL	GGGAATTTTTTTTTTTTTTTTTTGTCTTTTTGCTATTTCTTTGGGCCGCTCCCGAGGCATATGGAGGTTCCCAGGCTAGGGGTCTAATCGGAGCTGTAGCCACTGGCCTACGCCAGAGCCACAGCAACGCAGGATCCGAGCCGCGTCTGCAACCTACACCACAGCTCACGGCAACGCCGGATTGTTAACCCACTGAGCAAGGGCAGGGACCGAACCCGCAACCTCATGGTTCCTAGTCGGATTCGTTAACCACTGCGCCACGACGGGAACTCCTTTTTTTTTTTTTTTTTTTTTTTTGTCTA	G	ENSSSCG00000028777	intron_variant,feature_truncation	MODIFIER	-	protein_coding	INTRON=3/13,STRAND=-1	ESE,SXL binding site,C-to-U RNA editing sites
sv_12212	7	3198903	3198984	81	DEL	GTGTCTCCCGAGAGCTTCCTTTGCTGCCCACGCACAACACTTCCCTCCCCGTGGGGTTTTGTCCTCGCGCCCAGCCGTTCTC	G	ENSSSCG00000038717	intron_variant,feature_truncation	MODIFIER	-	protein_coding	INTRON=1/6,STRAND=1	ESE
sv_12343	7	9306436	9307171	735	DEL	TTGCTCCCTGGCCTCGCTCGGTGGGTTAAGGATCTGGTGTTGCAGTGAGCTGTGGTGTAGGTCAAAGATGCGGCTCAGATCCCCTGTTGCTGTGGCCATGGCGTAGGCCGGCAGCTACAGCTCCAATTCGACCCCTTGCCTGGGAACCTCCGTATGCCTGGGGTATGGCTCTAAAAAGACAAAAGAGATAAAACAAAAAAACCTCCAAGAAAACCCAACACTGTGGCCTTCCTTTGCCAAATTCCTTCTGTGGGCATCAGGCCATTCTCAAGCATCACCTGACATGGCCTCATCTTTCCACTCTCATCAACCTGAGTCTCCCACACCAAGCCCTGAATTTCCACTGCTCTCCTTCAAAACAAGGCATTCCGGAGTTCCCATCATGGCTCAGCGATAACA…	T	ENSSSCG00000001052	intron_variant,feature_truncation	MODIFIER	PHACTR1	protein_coding	INTRON=3/13,STRAND=1	acceptor,ESE,ESS,Musashi binding element (MBE),C-to-U RNA editing sites
sv_12354	7	9609071	9609127	56	DEL	GTATTTGCCACCCAAGACTATCTCTTCTGTACTCCACCCTCTTGTTCTCACTGCCAT	G	ENSSSCG00000001052	intron_variant,feature_truncation	MODIFIER	PHACTR1	protein_coding	INTRON=7/8,STRAND=1	ESE
sv_12463	7	14235194	14235332	138	DEL	TACTTAGATAAGTAAAAAGAAGACTGAGATGACAAAAAGTAAAAAGAAGACTGAGATGACAAAAAGTAAGCAAAACACTAAAGAACTGAAAAAAGTTCAGATACCGTATACACTGTATAATTTATCTCTTTCAGTGAGG	T	ENSSSCG00000001076	intron_variant,feature_truncation	MODIFIER	RNF144B	protein_coding	INTRON=11/16,STRAND=1	-
sv_12468	7	14574297	14574588	291	DEL	GCTAACTTTACATTTTTTTTTTTTTTTGCCTTTTTTTGTTGTTGTTGTTGTTGCTATTTCTTGGGCCGCTCCCGCGGCATATGGAGGTTCCCAGGCTAGGGTTGAATCGGAGCTGTAGCCACCGGCCTACGCCAGAGCCACAGCAATGCAGGATCCGAGCCGCATCTGCAACCTACACCACAGCTCAGGGCAATGCCGGATCGTTAACCCACTGAGCAAGGGCAGGGACCGAACCCGCAACCTCATGGTTCCTAGTCGGATTCGTTAACCACTGCGCCACGACGGGAACTCC	G	ENSSSCG00000001076	intron_variant,feature_truncation	MODIFIER	RNF144B	protein_coding	INTRON=16/16,STRAND=1	Polyadenylation sites
sv_12487	7	16246760	16246868	108	DEL	CGAAGCCCCTATACAGTTGTATCATAGGGCATAATTGCCCTTGCTTTATCTTGTGGTGATAAACATGAATCCTTTTAGGATTAGAAATTGTACTCTTAAAAGTGACTGT	C	ENSSSCG00000001080	intron_variant,feature_truncation	MODIFIER	CDKAL1	protein_coding	INTRON=10/16,STRAND=1	-
sv_12488	7	16267071	16267707	636	DEL	GAGGCCAGGGATCAAACCCCCATCCTCATGGATGCTATTCAGGTTCTTAACCTGCTGAGGCACAATAGGAACTTTCCATTTAGTTAGTTTTCAAATAATTATGCTAATTTTTTAATTATTAGTGAGTAGTATGCCCAAGAAAGCACTTACAATGAAAATATGCTTCTAGGAATTGTGGATCTATTCAGATACTCCTAGTTTAGCAGATTTATTTCAGTATTGACAGTTGTACTTACCTTTTATAGAATGAATTACTGACTCAGTTTGGGAATATGGCAGTGAGGAAGCAATGTGACCTCAGTGACATGGTCCAAATTGCTAAGTGCTTTTCTTTCTTAAGATTTAGATGGCCATCTGAGTTAAAACATCCATCGTACATATGTGGCTGAACATTTCCGT…	G	ENSSSCG00000001080	intron_variant,feature_truncation	MODIFIER	CDKAL1	protein_coding	INTRON=10/16,STRAND=1	acceptor,ESE,Polyadenylation sites,SXL binding site,Musashi binding element (MBE)
sv_12590	7	23286743	23286835	92	DEL	GAAAGACAAAACAAAACAAAACAAAACAAAAAAACAGAGATTGATGGAGGAGGAGGAGAAGAAGAGAGCGAGAAACACGATGGCAAAGGGGAA	G	ENSSSCG00000001379	intron_variant,feature_truncation	MODIFIER	TUBB	protein_coding	INTRON=4/4,STRAND=1	ESE,ncRNA hybridization regions
sv_12609	7	24583093	24583093	99	INS	A	ACTGTGGGCTCCACCCGCGGTCCCGGCCAACTCTGTCCTGGTCCGAGCTGGCTCGGGCTCGTCCAGCTGTTCAGGCCGACTTGGACCCGGGGCCGAGGGG	ENSSSCG00000038892	intron_variant,feature_elongation	MODIFIER	-	protein_coding	INTRON=3/10,STRAND=-1	-
sv_12610	7	24588455	24588714	259	DUP:TANDEM	GTGACACATGGTCGACCAGCTATCCCGGCCCATCTGGTCCTGGGTCCGAGCTGACGCGGTGTCGGTGAGCGGTCCCATCCGTCTCGGACACCCGTCCGAGGAGCTGTGGAGTCGACAAGCAATCCCGGCCGACTGGTTGTCGCCTCCGAACTCCCGAAGGGTCGACCAGCATTTCCTGCCGACTCGGACCCGGGTCCGAGGAGATGTGGGGTCCACCAGCTATCCCGACCGACTCGGTACCGGGTCCGAGC	GTGACACATGGTCGACCAGCTATCCCGGCCCATCTGGTCCTGGGTCCGAGCTGACGCGGTGTCGGTGAGCGGTCCCATCCGTCTCGGACACCCGTCCGAGGAGCTGTGGAGTCGACAAGCAATCCCGGCCGACTGGTTGTCGCCTCCGAACTCCCGAAGGGTCGACCAGCATTTCCTGCCGACTCGGACCCGGGTCCGAGGAGATGTGGGGTCCACCAGCTATCCCGACCGACTCGGTACCGGGTCCGAGCTGACACATGGTCGACCAGCTATCCCGGCCCATCTGGTCCTGGGTCCGAGCTGACGCGGTGTCGGTGAGCGGTCCCATCCGTCTCGGACACCCGTCCGAGGAGCTGTGGAGTCGACAAGCAATCCCGGCCGACTGGTTGTCGCCTCCGA…	ENSSSCG00000038892	intron_variant	MODIFIER	-	protein_coding	INTRON=3/10,STRAND=-1	ORF,donor,ESE,Ribosome Binding Site,long stems
sv_12611	7	24588658	24588658	100	INS	A	ATGTGGAGTCGACAAGCAATCCCAGCCGACACGTTGTCGCGTCGAAACTGCCGCCGGGTCGACCAACACTTACGGCCTATTCGGACCCAGGTCCGAGGAGC	ENSSSCG00000038892	intron_variant,feature_elongation	MODIFIER	-	protein_coding	INTRON=3/10,STRAND=-1	ESE
sv_12614	7	24592019	24592019	116	INS	T	TGGACCCGGCTCTGCGGAGCTGTGGACCTCACCAGCTACCCTGACCGACTCGGTACCGGGTCTGAGCTGACACAAGGTCAACCAGCTATTGCGGGCAACCGAGCTTCGGGCCCGAAC	ENSSSCG00000038892	intron_variant,feature_elongation	MODIFIER	-	protein_coding	INTRON=3/10,STRAND=-1	ESE,RNA C-to-U editing site
sv_12655	7	26471655	26471964	309	DEL	AAATAATCTAGCTTAAGGGAGTTCCCGTCGTGGCGCAGTGGTTAACAAATCCGACTAGGAACCATGAGGTTGCAGGTTCGGTCCCTGCCCTTGCTCAGTGGGTTAACGATCCGGCGTTGCCGTGAGCTGTGGTGTAGGTTGCAGACGCGGCTCGGATCCCGCGTTGCTGTGGTTCTGGCATAGGCCGGTGGCTACAGCTCCGATTAGACCACTACTAGCCTGGGAACCTCCATATGCCGCGGGAGCGGCCCAAGAAATAGCAAAAAGACCAAAAAAAAAATAAAAAAAATAAAATGGAAAAAAAAATAAT	A	ENSSSCG00000001484	intron_variant,feature_truncation	MODIFIER	TINAG	protein_coding	INTRON=9/9,STRAND=-1	ESE,ESS,Polyadenylation Signal (PAS),C-to-U RNA editing sites,ncRNA hybridization regions
sv_12728	7	33224291	33224367	76	DEL	CCCTCCCCCATCCTGTGTTCAAGCCGTGGGATCCACTTGTAATGAACATACTTCCTGGACACAGCAAGTCTCATACA	C	ENSSSCG00000001582	intron_variant,feature_truncation	MODIFIER	MDGA1	protein_coding	INTRON=7/16,STRAND=-1	ESE,Polyadenylation Signal (PAS)
sv_12803	7	38161295	38161384	89	DEL	ACTCCTAAGAGCTTCTTTTTAATAATGAAATATAGATCTAAAGGCTTTGCCAGATTCAGATTTGATTTTTTTTTTTTTCACGTATACTTT	A	ENSSSCG00000001660	intron_variant,feature_truncation	MODIFIER	PTK7	protein_coding	INTRON=1/19,STRAND=1	ESE,SXL binding site
sv_12834	7	41164898	41164972	74	DEL	CGGTTCAGGTTGCTGCAGAGGTGAGGGTTCAACCCCCAGCCTGGTGCAGTGGGTTAAGGATCTGGTGTTGTTGCA	C	ENSSSCG00000001716	intron_variant,feature_truncation	MODIFIER	RCAN2	protein_coding	INTRON=1/3,STRAND=-1	ESE
sv_12928	7	46105869	46105869	60	INS	T	TATTACTTATTAACTTGAAAATGCCTTTATCACTTGATCATAACTGTATTTTATGAATATA	ENSSSCG00000001750	intron_variant,feature_elongation	MODIFIER	PAQR8	protein_coding	INTRON=1/2,STRAND=1	Polyadenylation Signal (PAS)
sv_12973	7	50063271	50063467	196	DEL	ATAGAAGTTCGGTGTCTGCAACCTAGAATAGATTTACAAGGAGATCCTGCTGAATAGCATTGAGAACTATGTCTAGATACTCATGTTGCAACAGAAGAAACGGTGGGGGAAAAAACTGTAACTGCAATGTATACATCTAAGGATAACCTGACCCCCTTGCTGTACAGTGGGAAAATAAAAAAAAAAAAAAAAGAAAT	A	ENSSSCG00000001787	intron_variant,feature_truncation	MODIFIER	IL16	protein_coding	INTRON=6/18,STRAND=1	ESE,ESS,Polyadenylation Signal (PAS)
sv_13017	7	53337081	53337374	293	DEL	GAAAAAAAGTTCAAAGGAGTTCCCGTCGTGGCGCAGGGGTTAACGAATCCGACTAGGAACCATGAGGTTGCGGGTTCGGTCCCTGCCCTTGCTCAGTGGGTTAATGATCCGGCGTTGCCGTGAGCTGTGGTGTAGGTTGCAGATGCGGCTCGGATGCTGCGTTGCTGTGGCTGTGGTGTAGGCCAGTGGCTACAGCTGCGATTCGACCCCTAGCCTGGGAACCTCCACATGCCGTGGGAGCGGCCCAAAGAAATAGCAAAAAGACAAAAAAAAAAAAAAAAAAAAAAAAAAAAA	G	ENSSSCG00000001816	intron_variant,feature_truncation	MODIFIER	BLM	protein_coding	INTRON=2/20,STRAND=1	ESE,ESS,C-to-U RNA editing sites,ssc-miR-193a-3p
sv_13020	7	53755609	53755689	80	DUP:TANDEM	TTGCATCCACACCCCAGCCCCTGTATGCCTCCTCTACCCCTGTATCCACATCCCAGCCCTTGTATCCACATCCTCTGCCCC	TTGCATCCACACCCCAGCCCCTGTATGCCTCCTCTACCCCTGTATCCACATCCCAGCCCTTGTATCCACATCCTCTGCCCCTGCATCCACACCCCAGCCCCTGTATGCCTCCTCTACCCCTGTATCCACATCCCAGCCCTTGTATCCACATCCTCTGCCCC	ENSSSCG00000030626	intron_variant	MODIFIER	ALDH1L1	protein_coding	INTRON=20/23,STRAND=-1	ESE
sv_13046	7	55959569	55959667	98	DEL	GATTTTCTCTTTGTAAGAAAGGGTGGGGGAAAAACTGTAATTGTAATGTATACATGTAAGGATAACCTGACCCCCTTGCTGTACAGTGGGAAAAAAAAA	G	ENSSSCG00000037307	intron_variant,feature_truncation	MODIFIER	PRC1	protein_coding	INTRON=14/14,STRAND=1	C-to-U RNA editing sites
sv_13275	7	80841918	80842200	282	DEL	TAGGTCATGGCTATTTCTTTTTTTTTTTTTTTTTGTCTTTTTGCTATTTCTTGGGCCGCTCCCACGGCATATGGAGGTTCCCAGGCTAGGGGTCCAATCGGAGCTGTAGCCACGGGCCTACGCCAGAGCCACAGCAACGCGGGATCCGAGCCGCGTCTGCAACCTACACCACAGCTCACGGCAACACCGGATCCTTAACCCACTGAGCAAGGGCAGGGACGGAACCCGCAACCTCATGGTTCCTAGTCGGATTCGTTAACCACTGCGCCACAACGGGAACTCC	T	ENSSSCG00000033958	intron_variant,feature_truncation	MODIFIER	RYR3	protein_coding	INTRON=33/104,STRAND=-1	ESE,SXL binding site,C-to-U RNA editing sites
sv_13355	7	88191660	88191718	58	DEL	CCTCTTCCTTTCACACTAACACTACCTGAGGATTTCTGCCTTCCTTCATGCAGTTCTCA	C	ENSSSCG00000002259	intron_variant,feature_truncation	MODIFIER	-	protein_coding	INTRON=12/29,STRAND=1	-
sv_13380	7	89601504	89602362	858	DEL	GCTAATTATAGCAACAATGACCAAAAAAAAAAAAAAATCCTGTATGTAGTGCATTTCCTGTGTTTTGTTTGTTTGCTTGTTTGTTTTGCCTCCTATATATTCTAGGTGGGGTTGCTAGGTAATCCCCCAAACTAGAAATAACCAGTGGACGGAGCTGAAAAAAGCCCCATTTTTATTATTTCAACCCTGTTCCAGGTGAACATCATGAAAAATGTTTATTGCTCTCCCCAGTTGCCATAGCTGTAGAGATTGAGCGCACAGCCATGTCCTCCACACCTGCTCTGCAATAAAAAGGGCACCTCTGCCTCTCCCAACTGGTGTTAACAACCACAGAGACTTTGGACAAAGCCTCGTTCACCGTCACCATGCTGCAGTAATGAGGCAGATCCCATTTCCCTT…	G	ENSSSCG00000002283	intron_variant,feature_truncation	MODIFIER	FUT8	protein_coding	INTRON=8/12,STRAND=1	acceptor,ESE,ESS,Polyadenylation sites,Musashi binding element (MBE),Polyadenylation Signal (PAS),GU-rich destabilization element
sv_13418	7	93027107	93027168	61	DEL	AAAAAAAAAAAAAAAGGGATCCTGAGTTGCTGTGAGCTGTGGTGTAGGTTGCAGACGTGGCT	A	ENSSSCG00000002306	intron_variant,feature_truncation	MODIFIER	GALNT16	protein_coding	INTRON=11/15,STRAND=1	ESE,C-to-U RNA editing sites
sv_13477	7	97732176	97732450	274	DEL	TGGCAATATAGGTTTTTTTTTTTTTGTCTTTTTGCTATTTCTTTGGGCCGCTCCCGCGGCATATGGAGGTTCCCAGGCTAGGGGTCGAATCGGAGCTGTAGCCACTGGCCTACGCCAGAGTCACAGCAACGCGGGATCCAAGCTGCGTCTGCAACCTACACCACAGCTCATGGCAACGCCGGATAGTTAACCCACTGAGCAGGGGCAGGGACCGAACCTGCAACCTCATGGTTCCTAGTCGGATTCGTTAACCACTGCGCCACAACGGGAACTCC	T	ENSSSCG00000002366	intron_variant,feature_truncation	MODIFIER	NPC2	protein_coding	INTRON=3/3,STRAND=-1	ESE,SXL binding site,Musashi binding element (MBE),C-to-U RNA editing sites,ncRNA hybridization regions
sv_13503	7	99964885	99965167	282	DEL	AAAAAAAAAAAAAAAAGGGCGTTCCCGTGGTGGCGCAGTGGTTAACGAATCCGACTAGGAACCATGAGGTTGCGGGTTCGGTCCCTGCCCTTGCTCAGTGGGTTAAAGATCCGGCATTGCCGTGAGCTTTGGTGTAGGTCGCAGACGCGGCTCGGATCCCGCGTTGCTGTGGCTCTGGCGTAGGCCGGTGACTACAGCTCCGATTAGACCCCTAGCCTGGGAACCTCCACATGCCGTGAGAGCGGCCCAAGAAATGGCAAAAAGACCAAAAAAAGAAAAAAAG	A	ENSSSCG00000002391	intron_variant,feature_truncation	MODIFIER	LRRC74A	protein_coding	INTRON=1/12,STRAND=1	donor,ESE,C-to-U RNA editing sites
sv_13570	7	103508026	103508079	53	DEL	TGTAGAACAGATGCTGACTCACAGACATTGAAAAACTTATGGTCTCTGGAGGAG	T	ENSSSCG00000002410	intron_variant,feature_truncation	MODIFIER	CEP128	protein_coding	INTRON=20/26,STRAND=-1	ESE
sv_13574	7	103907302	103907638	336	DEL	AAACCTCATGGTTCCTAGTTGGATTTGCTTCTGTTGCGCCATGACAGGAACTCTGAGAATTCCCAATTTAAATATGAAGTTGCCTGTCACTCTTTTTTTTTTCCCCCCTTTTTTTTTTTTTGTCTTTTGTCTTTTTTGTTGTTGTTGTTGCTATTTTTTGGGCCGCTCCCGCGGCACATGGAAGTTCCCAGGCAAGGGGTCGAATTGGAGCTGTAGCCACCGGCCTACACCAGAGCCACAGCAACGAGGGATCCGAGCCGCGTCTGCAACCTACACCACAGCTCATGGCAACGCCGGATCGTCAACCCACTGAGCATAGGGCAGGGATCGAACCCGC	A	ENSSSCG00000031771	intron_variant,feature_truncation	MODIFIER	TSHR	protein_coding	INTRON=9/10,STRAND=1	ORF,ESE,SXL binding site
sv_13702	7	110590804	110590804	105	INS	C	CCACGGCTGCTTTACAGCCATAGCTTTTTGGATAAACAAAAATATATGCTAAGTCAGTTTTAATCAGTCTTTTGACTAATTAAAAATTATATTGACATATTTAATA	ENSSSCG00000002427	intron_variant,feature_elongation	MODIFIER	EML5	protein_coding	INTRON=18/43,STRAND=-1	ESE,Polyadenylation Signal (PAS),C-to-U RNA editing sites
sv_13703	7	110774123	110774431	308	DEL	TGGTCTGTTTCTTTTTTTTTTTTTTTTTTTTTTTTGGTCTTTTTGTCTTTTGTTGTTGTTGTTGTTGCTATTTCTTGGGCCGCTCCCGCGGCATATGGAGGTTCCCAGGCTAGGGGTTGAATCGGAGCTGTAGCCACCGGCCTATGCCAGAGCCACAGCAACGCGGGATCCGAGCCGCGTCTGCAACCTACACCACAGCTCACGGCAACGCCAGATCGTTAACCCACTGAGCCAGGGCAGGGACCGAACCCGCAACGTCACGGTTCCTAGTCGGATTCGTTAACCACTGCGCCACAACGGGAACTCCAA	T	ENSSSCG00000002428	intron_variant,feature_truncation	MODIFIER	TTC8	protein_coding	INTRON=9/13,STRAND=1	ESE,SXL binding site
sv_13786	7	115610350	115610418	68	DEL	GCGCAGGGGAGCTGTGAGGAAACCCTGCTGGGGAGTGGTCCCCGCTCAACCCTCTCAGTGAACCTCTGT	G	ENSSSCG00000002476	intron_variant,feature_truncation	MODIFIER	SERPINA1	protein_coding	INTRON=2/6,STRAND=-1	ESE
sv_13975	8	4909928	4910583	655	DEL	TGCGTTGCTGTGGCTGTGGTGTAGACCAGCAGCTACAGCTCCGATTCGACCCCTAGCCTGGGAACCTCCATATGCCACAGTGAGACATTACAAAGACAAAAGATAATAATAATAATATAAAAAAGAAAAAAGAAAGACACTCTTATGAGGCAGGATGTTCCCAGGGCTTTCGTGGCTCATTTCCCAGGATCTGGTCCAGGGCCAGTCCTCTCTTGGGGAGGTGCAGGGGCTGGACGGCCAAGCCTGCTGAGCCAGCCATGCGCTGCACAGCCCTCACATCAGCCCAGGCCCTTGGCTCTCTTGCTCCCCTTCCTGGATCGAGATGGTGCTGCCAATCTCTCACATGTCCTTCTAGAGACATTTTCTGCCACGGGCGTGCAGTTATGACTCGGCGGGGGG…	T	ENSSSCG00000024399	intron_variant,feature_truncation	MODIFIER	EVC2	protein_coding	INTRON=4/23,STRAND=1	ORF,acceptor,Ribosome Binding Site,ncRNA hybridization regions,ssc-miR-450b-3p
sv_13983	8	5146839	5146839	106	INS	C	CCCACCACCATCATCACCATTGTCATCACTGTTGTCATCATCCGTCCCATCATCCCCACCGTCATCATCACCAGCATCACCACCATCATCATCACCAGCATCA	ENSSSCG00000035020	intron_variant,feature_elongation	MODIFIER	STK32B	protein_coding	INTRON=4/11,STRAND=-1	ESE
sv_13987	8	5312980	5313432	452	DEL	AAGCTATTGCTCCATTGTATTTGGGTTTTCACAAAGTTTCCATTTCTTAACACAACGTGTCCTTTTGTTCTCGGGTTGCTTTTAAGATTTTCTCTTAATGGTTTTAAGCTATTTGATTATGATGTTTCTGATGATGTTTCCTTTCTTTTTTTTTTTTTAAGGCCACACCTGCGACACATGGAAGTTCTCAGACCAGGCGTTGAATCAGAGTTACAGGTGCAACCTAAACTGCAGCTTGTGGCCACGTGCCGGATCCTTAATCCATGGAGTGAGGCCAGGGATCAAACCCGCATCCTCACAGAGACAACGCTGGGTTCTTTTTTTATCTTTTTAGGGCTGCACCTGTGGCATATGGAAGTTCCCAGGCTAGGGGTTAAATCGGAGTTGCAGCTGTCCGCC…	A	ENSSSCG00000035020	intron_variant,feature_truncation	MODIFIER	STK32B	protein_coding	INTRON=2/11,STRAND=-1	ESE,ESS,Polyadenylation Signal (PAS),C-to-U RNA editing sites
sv_13989	8	5326525	5326609	84	DEL	CAAAAAAAAAAAAAAAAAAAAAAAAAAAAAAAAAAAAAAAAAAGGAAGGAAGGAAGGAAAGTTAAATTCATAGAACCAAAAAAAA	C	ENSSSCG00000035020	intron_variant,feature_truncation	MODIFIER	STK32B	protein_coding	INTRON=2/11,STRAND=-1	ESE,C-to-U RNA editing sites
sv_14089	8	11891543	11891599	56	DEL	CGAGCATCATCTGCACCTACACCACAGCTCACAGCAACACCGGATTCCCAACCCACT	C	ENSSSCG00000029227	intron_variant,feature_truncation	MODIFIER	LDB2	protein_coding	INTRON=2/8,STRAND=-1	ESE,C-to-U RNA editing sites
sv_14140	8	14819672	14819672	57	INS	C	CAACGCCATCCCGATACAGTATATTCATCAGTATTTTATCACATTTTTAAAAAGTTAA	ENSSSCG00000008749	intron_variant,feature_elongation	MODIFIER	SLIT2	protein_coding	INTRON=4/39,STRAND=1	Polyadenylation Signal (PAS),C-to-U RNA editing sites
sv_14187	8	16747043	16747326	283	DEL	TAAAAATTATTTTTGGAGTTCCCGTCGTGGCACAGTGGTTAACGAATCCGACTAGGAACCATGAGGTTGCGGGTTCGGTCCCTGCCCTTGCTCAGTGGGTTAACGATCCGGCGTTGCCGTGAGCTGTGGTGTAGGTCACAGATGCGGCTCGGATCCTGCGTTGCTGTGCCTCTGGCGTAGGCCGGTGGCTACAGTTCCGATTAGACCCCTAGCCTGGGAACCTCCATATGCCGTGGGAGCAGCCCAAGAAATAGCAACAACAACAACAAAAGACAAAAAAAAAA	T	ENSSSCG00000008753	intron_variant,feature_truncation	MODIFIER	ADGRA3	protein_coding	INTRON=2/18,STRAND=-1	ESE,ESS,Polyadenylation Signal (PAS),C-to-U RNA editing sites
sv_14222	8	18842333	18842617	284	DEL	ATGCTCCCACATTCTTTTTTTTTTTTTTTTTTTTTGTCTTTTTGCTATTTCTTTGGGCGGCTCCCGCGGCATATGGAGGTTCCCAGGCTAGGGGTCAAATCGGAGCTGTAGCCACCAGCCTACGCCAGAGCCACAGCAATGCGGGATCCGAGCCGCGTCTGCAACCTACACCACAGCTCAGGGCAATGCCGGATTGTCAACCCACTGAGCAAGGGCAGGGACCGAACCCGCAACCTCATGGTTCCTAGTCGGATTCGTTAACCACTGCACCACGACGGGAACTCC	A	ENSSSCG00000023001	intron_variant,feature_truncation	MODIFIER	CCDC149	protein_coding	INTRON=4/12,STRAND=-1	ESE,SXL binding site,C-to-U RNA editing sites
sv_14236	8	19500083	19500145	62	DEL	CTTAAAAATCCTAAAACTTAATCCATCCTCTCCAGGAAGAAAAAGTTAACATTGTAACGTATT	C	ENSSSCG00000008758	intron_variant,feature_truncation	MODIFIER	SLC34A2	protein_coding	INTRON=6/12,STRAND=1	ESE
sv_14398	8	30228710	30228710	87	INS	C	CCATATGCTGCAGGTGTGGCCATAAAAAAGACAATAGGTAGGTAGGTAGGCAGATAGAGAGATAGATAGGTAGATACATACATACATA	ENSSSCG00000008785	intron_variant,feature_elongation	MODIFIER	FAM114A1	protein_coding	INTRON=4/9,STRAND=1	ESE
sv_14554	8	40267861	40267911	50	DEL	GAGCTGGCCCCTCAGTAACCCTGAAGGGATGGATGAAACTGTCATCTGAGT	G	ENSSSCG00000008838	intron_variant,feature_truncation	MODIFIER	LNX1	protein_coding	INTRON=7/12,STRAND=-1	-
sv_14745	8	67708104	67708185	81	DEL	CCATTGCATGGATATACTACAGTTTATTTCTTCCTAGTTGTGGACTTTTGGATTGTTTCCAATAATTAGATTATGAATAAAA	C	ENSSSCG00000008943	intron_variant,feature_truncation	MODIFIER	SLC4A4	protein_coding	INTRON=1/32,STRAND=1	Polyadenylation Signal (PAS)
sv_14885	8	78837954	78838240	286	DEL	TTCTTATTCTTTGTTTTTTTTTTATTTTTGTCTTTTGTTGTTGTTGCTATTTCTTCGGCCGCTCCCGCAGCATATGGAGGTTCCCAGGCTAGGGGGTTGAATCGGAGCTGTAGCCACCGGCCTACGCCAGAGCCACAGCAACGCGGGATCCGAGCCGAGTCTACAACCTACACCACAGCTCACGGCAACGCCAGATCCTTAACCCACTGAGCAAGGGCAGGGATCGAACCCGCAACCTCATGGTTCCTAGTCGGATTCGTTAACCACTGCGCCACGACGGGAACTCC	T	ENSSSCG00000009023	intron_variant,feature_truncation	MODIFIER	DCLK2	protein_coding	INTRON=1/16,STRAND=-1	ESE,C-to-U RNA editing sites
sv_14954	8	86937310	86937431	121	DEL	GACGTGTGCTTTTTCTTTGTTTTGTATCGAACAGATTCCCTTCTCTGATGTTCAGTGGGGAACACCGTTGCCTGAGGATGGCAATTAGCTAGAGCTAGGCCATCTCGTCTTTGCACAGCCCA	G	ENSSSCG00000009060	intron_variant,feature_truncation	MODIFIER	MAML3	protein_coding	INTRON=1/6,STRAND=1	ESE,C-to-U RNA editing sites
sv_15181	8	109655180	109655344	164	DUP:TANDEM	GTCATTGCTATTTCTATCTAGACTTAAAAGAAACAAATGCCAGAGCCAAGGAGCAATCGAACACATCTAATTGGAATTAGAGATTCTTCTTTCTAAAATAACTTGACTTCAAGCCTGCTGACCACATTCTAAAGCAATGGTTCTAAACTCTAGCACACATAAATA	GTCATTGCTATTTCTATCTAGACTTAAAAGAAACAAATGCCAGAGCCAAGGAGCAATCGAACACATCTAATTGGAATTAGAGATTCTTCTTTCTAAAATAACTTGACTTCAAGCCTGCTGACCACATTCTAAAGCAATGGTTCTAAACTCTAGCACACATAAATAGAGTGGGGCACCTATTAAAAATCATTGCTATTTCTATCTAGACTTAAAAGAAACAAATGCCAGAGCCAAGGAGCAATCGAACACATCTAATTGGAATTAGAGATTCTTCTTTCTAAAATAACTTGACTTCAAGCCTGCTGACCACATTCTAAAGCAATGGTTCTAAACTCTAGCACACATAAATA	ENSSSCG00000009125	intron_variant	MODIFIER	-	protein_coding	INTRON=1/45,STRAND=-1	ESE,ESS,Polyadenylation Signal (PAS),C-to-U RNA editing sites
sv_15283	8	115969197	115969266	69	DEL	TTTTTTTTTTTTTTCCCACTGTACAGCAAGGGGGTCAGGTTATCCTTAGATGTATACATTGCAATTACAG	T	ENSSSCG00000023548	intron_variant,feature_truncation	MODIFIER	GSTCD	protein_coding	INTRON=5/11,STRAND=-1	ESE, SXL binding site
sv_15366	8	121335167	121335460	293	DEL	TAAAGATGACAGAGGAGGAGTTCCCGTCGTGGCGCAGTGGTTAACGAATCCGACTAGGAACCATGAGGTTGCGGGTTCGGTCCCTGCCCCTTGCTCAGTGGGTTGACGATCCGGCGTTGCTGTGAGCTGTGGTGTAGGTTGCAGACGTGGCTCGGATCCCGCTTTGATGTGGCTCTGGCGTAGGCCAGTGGCTACAGCTCCGATTCAACCCCTAGCCTGGGAACCTCCATATGCCGCGGGAGCGGCCCAAGAAATAGCAACAACAAAAGACAAAAAAAAGACAAAAAAAAAAAA	T	ENSSSCG00000009186	intron_variant,feature_truncation	MODIFIER	METAP1	protein_coding	INTRON=1/9,STRAND=-1	ESE,ESS,Polyadenylation Signal (PAS),C-to-U RNA editing sites
sv_15424	8	124327820	124327887	67	DEL	ACCACAAGCAACGGCCTCTTTTCTGGGCTTGGGAGCCAGACATGGACTGTTTCCTCAGGGGCGGGGCC	A	ENSSSCG00000021874	intron_variant,feature_truncation	MODIFIER	UNC5C	protein_coding	INTRON=1/15,STRAND=1	ESE,C-to-U RNA editing sites
sv_15579	8	131492618	131493445	827	DEL	TTTAACCCACTGAGCAAAGCCAGGGATGGAAACCGCAACTTCACGGTTCTTAGTCGGATTCGTTTCTGCTGTGCCGCGACGGGAACTCTGACTGCTCCTTTCCTTGAGCCTCCGTGACCATCTAATTTCCGCAACGTTCAGCGTTTGACATTTTGCAAATGTTTCACCTGTTATACTGTTTGCTTCTTCCAAATGTTAATATTTCTACATTTGCCACTTTGGACAGCCACTGGCATATCCCAAAACTCAATAAGTGCTTGCTGAATTGAATTAAAATGGAAACAAAAGAGGATTCCGTGAAAGAGTAGAAATGAAGGAAGGCTTTAGAAAGAGAGTTACGTGCCCAGAACAGTTGTGTTAGTTTGAAATTGCCAAATACAAATTATCCAAAAAGAAAGA…	T	ENSSSCG00000009225	intron_variant,feature_truncation	MODIFIER	HSD17B11	protein_coding	INTRON=2/8,STRAND=1	acceptor,ESE,ESS,Polyadenylation sites,Musashi binding element (MBE),ncRNA hybridization regions
sv_15587	8	131883483	131884464	981	DEL	GCAGACGAGGCTCAGATCCCGCAGTGCTGCGGCTGTGGATCCGGACTAGCATCCATGAGGATGCAGGTTCAATCCCTGGCCTTGCTCAGTGGGTTAAAGATCCAGTGTTGCCATGAGCTATGGTGTAGGTCACAGACACAGCTCAGGTCTGGCAGCTCTGATTCAACCCCTAGCCTGGGAACATTCACATGCCACTGCTATGGCCCTAAAGAGGAAAAAATAAAAAATAATTTTAAAAATGGTTAGGACTCCAAAGCCCCCCCAAAGAAAGCAAAAATGAATCAGGACAACCACAGTTCTCAGCAGAAAGATCTTACCCAGAACATGTCACCTCCTTTCACAAGCCTGTGACACTTCACTGACACTTGCGTTAGGGCAGTGATCACACACTTTGGTAAC…	G	ENSSSCG00000023593	intron_variant,feature_truncation	MODIFIER	AFF1	protein_coding	INTRON=2/20,STRAND=-1	acceptor,ESE,ESS,Polyadenylation sites,long stems,ncRNA hybridization regions
sv_15656	8	135273527	135273679	152	DEL	CCCCCCACGTGAGGCTCTTGTTTCTTATATTCCCCCATCCTTTTTTTTTTTTTTTTTTTTTTTTTTGGTCTTTTGTCATTTTAGGGTCCCACTTGCAGCATATGGAGGTTCCCAGACTAGGGGTCCAATCGGAGCTACTGCTGCCAGGCTACA	C	ENSSSCG00000009240	intron_variant,feature_truncation	MODIFIER	PLAC8	protein_coding	INTRON=4/5,STRAND=1	ESE,SXL binding site,C-to-U RNA editing sites
sv_15727	9	2277267	2277344	77	DEL	ACATGTATACATTCTTTTTTTTTTTTTCAGAGAGAGAAACTACTCTTTATTTATTTATTTATTTTTTTATTCTTTATT	A	ENSSSCG00000014599	intron_variant,feature_truncation	MODIFIER	SYT9	protein_coding	INTRON=3/6,STRAND=-1	AU-rich class-2 Element (ARE2),SXL binding site
sv_15804	9	6400309	6400587	278	DEL	TCACCTCTTATTCTTTTTTTTTTTTTTTTTTGTCTTTTTGCTATTTCTTTGGGCCGCTCCCGCGGCCTACGGAGGTTCCCAGGCTAGGGGTCGAATCGGAGCTGTAGCCGCCAGCCTACGCCAGAGCCAAGCAACGCGGGATCCGAGCCGCGTCTGCAACCTACACCACAGCTCACGGCAACACTGGATCGTTAACCCACTGAGCAAGGGCAGGGACCGAACCCGCAACCTCATGGTTCCTAGTCGGATTCGTTAACCACTGCGCCACGACAGGAACTC	T	ENSSSCG00000014794	intron_variant,feature_truncation	MODIFIER	NUP98	protein_coding	INTRON=22/31,STRAND=1	ESE,SXL binding site,C-to-U RNA editing sites
sv_15869	9	9227764	9227916	152	DEL	ACAGAAACGCGGGATCCGAGCCGCGTCTGCAACCTACACCACAGCTCACGGCAACGCCGGATCGTTAACCCACTGAGCAAGGGCAGGGATCGAACCCGCAACCTCATGGTTCCTAGTCGGATTCGTTAACCACTGCGCCACGATGGGAACTCC	A	ENSSSCG00000021702	intron_variant,feature_truncation	MODIFIER	XRRA1	protein_coding	INTRON=10/18,STRAND=-1	ESE,C-to-U RNA editing sites
sv_15919	9	12627301	12627394	93	DEL	CCTACATTCCCCCAACAGTTTAGAAGGATTCCCTTTTCTTTGCATCCTCTCCAGCTTTTATTATTTGTAGACTTTTTGGTGATGGCTCGTCTGG	C	ENSSSCG00000014892	intron_variant,feature_truncation	MODIFIER	USP35	protein_coding	INTRON=6/9,STRAND=1	ESE
sv_16009	9	17085057	17085387	330	DEL	TAAGAACCTGACTGCAGGGAGTTCCCGTCGTGGCGCAGTGGTTAACGAATCCGACTAGGAACCATGAGGTTGCGGGTTCGGTCCCTGCCCTTGCTCAGTGGGTTAACGATCCGGCGTTGCCGTGAGCTGTGGTGTAGGTCGCAGACGCGGCTCGGATCCCGCATTGCTGTGGCTCTGGTGTAGGCCGGTGGCTACAGCTCTGATTCAACCCCTAGCTTGGGAACCTCCATATGCCGCGGGAGCGGCCCAAGAAATAGCAACAACAGCAACAACAACAACAGACCAAAAAGACAAAAAAAAAAAAAAAAAAAAAAAAAAAAGAAAAGAAAAA	T	ENSSSCG00000014898	intron_variant,feature_truncation	MODIFIER	DDIAS	protein_coding	INTRON=1/4,STRAND=1	ESE,ESS,C-to-U RNA editing sites
sv_16122	9	23084353	23084665	312	DEL	GTTTTTTTTTTTTGTCTTTTGTCTTTTTTGTTGTTGTTTTGTTGTTGTTGTTGTTGTTATTGTTGCTATTTCTTGGGCCGCTCCCGCGGCATATGGAGGTTCCCAGGCTAGGGGTTGAATCGGAGCTGTAGCCACCGGCCTACGCCAGAGCCACAGCAACGTGGGATCGGAGCTGTGTCTGCAACCTACACCACAGCTCATGGCAACGCCGGATCGTTAACCCACTGAGCAAGGGCAGGGACCGAACCCACAACCTCATGGTTCCTAGTCGGATTCGTTAACCACTGCGCCACGACGGGAACTCCAGGAAGGT	G	ENSSSCG00000024966	intron_variant,feature_truncation	MODIFIER	TRIM77	protein_coding	INTRON=5/7,STRAND=-1	ESE,SXL binding site,C-to-U RNA editing sites
sv_16374	9	39266560	39266881	321	DEL	GCTCAAGGTTGTTTTTCTTTTTTTTTTTTTTTTTTTTTTTTTTTTTGTCTTTTTGTCTTTAGTTGTTGTTGTTCTTGTTGTTGCTATTTCTTGGGCCGCTCTCGCGGCATATGGAGGTTCCCAGGCTAGGGGTCGAATCGGAGCTGTAGCCACCGGCCTACGCCAGAGGCACAGCAATGCAGGATCCGAGCCGCGTCTGCAACCTACACCACAGCTCACGGCAACGCAGGATCGTTAACCCACTGAGCAAGGGCAGGGACCAAACCCGCAACCTCATGGTTCCTAGTCGGATTCGTTAACCACTGCGCCACGACGGGAACTC	G	ENSSSCG00000015020	intron_variant,feature_truncation	MODIFIER	BTG4	protein_coding	INTRON=4/9,STRAND=-1	ESE,SXL binding site,C-to-U RNA editing sites,ncRNA hybridization regions
sv_16480	9	48028623	48028735	112	DUP:TANDEM	GTTGCCAGGGAGTGACAAATAGTGGAACACAGGCAGGAGATGAAAATGGAGGGTGGATGTGGTCAGTAAATACAGCCAAAGCTGGTGTCAGTTTGGCCAAAAGTGAAGGAGAG	GTTGCCAGGGAGTGACAAATAGTGGAACACAGGCAGGAGATGAAAATGGAGGGTGGATGTGGTCAGTAAATACAGCCAAAGCTGGTGTCAGTTTGGCCAAAAGTGAAGGAGAGCAAATCAATTTGCCAGGGAGTGACAAATAGTGGAACACAGGCAGGAGATGAAAATGGAGGGTGGATGTGGTCAGTAAATACAGCCAAAGCTGGTGTCAGTTTGGCCAAAAGTGAAGGAGAG	ENSSSCG00000015131	intron_variant	MODIFIER	GRIK4	protein_coding	INTRON=11/18,STRAND=1	ESE,Musashi binding element (MBE)
sv_16723	9	66092650	66092767	117	DUP:TANDEM	GTGAATGATTTAGGAGCTGGACCAGCCCAGATAGTGTGTCTGACCAGATCTTTCCTCTTTGTTTCACTTGTTTAGGCACCACCTCAGTCTAAATCCCTTGTCTCAGCCTTGCGCTTGC	GTGAATGATTTAGGAGCTGGACCAGCCCAGATAGTGTGTCTGACCAGATCTTTCCTCTTTGTTTCACTTGTTTAGGCACCACCTCAGTCTAAATCCCTTGTCTCAGCCTTGCGCTTGCTGAATGATTTAGGAGCTGGACCAGCCCAGATAGTGTGTCTGACCAGATCTTTCCTCTTTGTTTCACTTGTTTAGGCACCACCTCAGTCTAAATCCCTTGTCTCAGCCTTGCGCTTGC	ENSSSCG00000015291	intron_variant	MODIFIER	LEMD1	protein_coding	INTRON=2/6,STRAND=-1	ESE,Musashi binding element (MBE),C-to-U RNA editing sites
sv_17001	9	97503261	97503337	76	DEL	TATTCAGCTATTTTCTCAAAAATTAAAGTGAGCTTGTCACTTTAAGAAAACAATAGACAGTTGTTGTCAGTGATAAA	T	ENSSSCG00000015401	intron_variant,feature_truncation	MODIFIER	PCLO	protein_coding	INTRON=19/21,STRAND=1	Polyadenylation Signal (PAS),ncRNA hybridization regions
sv_17058	9	103990439	103990562	123	DEL	GCTGCTGGCCTACTCCAGAGCCACAGCAACTTGGGATCCGAGCCAAGTCTGCAACCTGCACCACAGCTCATGGCAATGCTGGATCCTTAACCCACTGAGCAAGGCCAGGGATTGAACCTGCAAC	G	ENSSSCG00000015427	intron_variant,feature_truncation	MODIFIER	ORC5	protein_coding	INTRON=21/27,STRAND=-1	ESE,ESS,C-to-U RNA editing sites
sv_17078	9	105581355	105581476	121	DUP:TANDEM	CTGGTTCAATAATTTTAGTGAGTATATCACACTTGACTATAATAAGGGAAAACTGGCTGTGGGGTATGTGGGAACTCTGTTACTATCTTTTCAATGTTTCGGTAAGTTTAAAACTGCCCTGG	CTGGTTCAATAATTTTAGTGAGTATATCACACTTGACTATAATAAGGGAAAACTGGCTGTGGGGTATGTGGGAACTCTGTTACTATCTTTTCAATGTTTCGGTAAGTTTAAAACTGCCCTGGTGGTTCAATAATTTTAGTGAGTATATCACACTTGACTATAATAAGGGAAAACTGGCTGTGGGGTATGTGGGAACTCTGTTACTATCTTTTCAATGTTTCGGTAAGTTTAAAACTGCCCTGG	ENSSSCG00000015432	intron_variant	MODIFIER	ATXN7L1	protein_coding	INTRON=8/17,STRAND=-1	ESE,Polyadenylation Signal (PAS)
sv_17310	9	120633043	120633240	197	DEL	GTAAATACATGTTTGGCAGATGTTCTCTTTTTTATAGCTGTAGTATATGTTGTCTGAGCATAGAGGTGTCTTATAATGTACACTCCTTTTAACTGGCATTGCTCTATTTCTGTGACTAAATTACATTTACTGCTCACTACCATCCTTATGTTGATGTTGCTCTACTCATTTGGTTGCCCGAAGAGCTCATTGTAGCAA	G	ENSSSCG00000015523	intron_variant,feature_truncation	MODIFIER	RALGPS2	protein_coding	INTRON=10/24,STRAND=1	ESE,Polyadenylation sites,Musashi binding element (MBE)
sv_17348	9	123163989	123164229	240	INV	CTGGTGAGGGTGTGAGGCCACCTGGAGAGGAGGGAGGGGAAGGGAAGAGCTCAGAGGAAACCGGAGGGAGAGGTGGAAGGTGTAGAGAGGGTGCGGCACGCCTGTTAAAGGTTTGTGAAGAATCTTGGGGGCGCTGCTTTCCCCAGGAGAACCTTGCAAGCTCTCAGTCATCTTAATAACCCCTAGGGCACAGCTCTGCTGTGCTGGGCTCCTCCCCAGGAGCCCTTTGCTCCTCCTCTTC	CCACCATGGCTTCTTAGATGAGCAGAAGAGGAGGAGCAAAGGGCTCCTGGGGAGGAGCCCAGCACAGCAGAGCTGTGCCCTAGGGGTTATTAAGATGACTGAGAGCTTGCAAGGTTCTCCTGGGGAAAGCAGCGCCCCCAAGATTCTTCACAAACCTTTAACAGGCGTGCCGCACCCTCTCTACACCTTCCACCTCTCCCTCCGGTTTCCTCTGAGCTCTTCCCTTCCCCTCCCTCCTCTCCAGGTGGCCTCACACCCTCACCA	ENSSSCG00000015543	intron_variant	MODIFIER	CACNA1E	protein_coding	INTRON=8/48,STRAND=1	ESE,ncRNA hybridization regions
sv_17909	10	14546142	14546464	322	DEL	TCCCGGAGCCATTTCTTTTTTTTTTTTTTTTTTTTTTGTCTTTTGTCTTTTGTCTTTTTTTTTTTGCTGTTGTTGTTATTGTTGCTATTTCTTGGGCCGCTCCCGCGGCATATGGAGGTTCCCAGGCTAGGGGTCGAATCGGAGCTGTAGCCACCGGCCTACGCCAGAGCCACAGCAACTCAGAATCCGAGCCGCGTCTGCAACCTACACCACAGCTCACGGCAACGCCGGATCGTTAACCCACTGAGCAAGGGCAGGGATCGAACCCGCAACCTCATGGTTCCTAGTCGGATTCGTTAACCACTGCGCCACGACGGGAACTC	T	ENSSSCG00000010860	intron_variant,feature_truncation	MODIFIER	PSEN2	protein_coding	INTRON=2/10,STRAND=1	ESE,SXL binding site,C-to-U RNA editing sites
sv_17995	10	17841266	17841563	297	DEL	TTCTTTTTTGCTTTTTTTTTTTTGTCTTTTGTTTTTTTGTCTTTTGTTGTTGTTGTTGCTATTTCTTGGGCCGCTCCCGCAGCATATGGAGGTTCCCAGGCTAGGGGATGAATCGGAGCTGCAGCCACCGGCCTACGCCAGAGCCACAGCAACGCAGGATCCGAGCCGCGTCTGCAACCTACACCACAGCTCACGGCAACGCCGGATCGTTAACCCACTGAGCAAGGGCAGGGACCGAACCTGCAACCTCATGGTTCCTAGTCGGATTCGTTAACCACTGCGCCACGACGGGAACTCC	T	ENSSSCG00000010879	intron_variant,feature_truncation	MODIFIER	KIF26B	protein_coding	INTRON=2/14,STRAND=1	ESE,SXL binding site,GU-rich destabilization element,C-to-U RNA editing sites,ncRNA hybridization regions
sv_18013	10	18763343	18763643	300	DEL	GAGGGGAGTTCCCGTCATGGCAGTGGTTAACGAATCCGACTAGGAACCATGAGGTTGCGGGTTCGGTCCCTGCCCTTGCTCAGTGGGTTAACGATCCGGCATTGCCGTGAGCTGCGGTGTAGGTTGCAGACGCGGCTCGGATCCCGCGTTGCTGTGGCTCTGGCGTAGGCCGGTGGCTGCAGCTCCGATTGGACCCCTAGCCTGGGAACCTCCATATGCCGCAGGAGCGGCCCAAGAAATAGCAACAACAACAACAACAACAAAAAAAAAGACCAAAAAAAAAAAAAAAAAAGAAAAGGCA	G	ENSSSCG00000022034	intron_variant,feature_truncation	MODIFIER	SMYD3	protein_coding	INTRON=5/11,STRAND=-1	ESE,ESS,C-to-U RNA editing sites
sv_18033	10	19524717	19525095	378	DEL	CAATCCCTGGCCTCTCTCAGTGGGTTAAGGATACGGCACTGCCGTGAGCTATGATGTGGGTCACAAATGTGGCTTAGATCCCACGTTGCTGTGGCTGTGGTATAGGCCAGCGGCTGTAGTTCTGATTCAACCCCTAGCCTGGGAACCTCCATATGATGTGGGTGCAGCCCTAAAAAGACCAAAAAAAAAAGAAAGAAAAAAAGAAAAGAAAAAGAAAGAAAGAAAGAAAAATCTGGTTACAAAATAATGTCTCTAGTACTGCTCGGTGGGGAAACATATGTGTACAAGCAGAAAAGTGACATACATCACATTTTTAACAGGAGGTTAGTGTGACATGTTTTCTTAATTTTGCTTATCCAAATTCCCTTTTAAAACTTCA	C	ENSSSCG00000011176	intron_variant,feature_truncation	MODIFIER	SUSD4	protein_coding	INTRON=2/9,STRAND=-1	ESE,Musashi binding element (MBE),Polyadenylation Signal (PAS),C-to-U RNA editing sites
sv_18106	10	24168414	24168522	108	DEL	CAACCCACAGCACAGCTCACAGCAATGCTGAATCCTTAGCCCACAGCACAGCTCACAGCAATGCTGAATCCTTAGCCCACAGCACAGCTCACAGCAATGCTGAATCCTT	C	ENSSSCG00000031981	intron_variant,feature_truncation	MODIFIER	SHISA4	protein_coding	INTRON=8/8,STRAND=1	ESE
sv_18111	10	24646907	24647011	104	DEL	ACACACACTCACATGGTCACACACAAACTCACATTCACCCACATTCACACAGTAACACAGGCTCACACACTTACACGTTCACACACACACACAGACTCGCACGTT	A	ENSSSCG00000010926	intron_variant,feature_truncation	MODIFIER	SYT2	protein_coding	INTRON=3/9,STRAND=-1	ESE
sv_18147	10	27328795	27328933	138	DUP:TANDEM	TTGAACTGGTCTGAACACCAAGGGCAGAGGCTGAGAGCCTCCAGGCGTAGAATGTCAGGTCCCGCTCTGCTTCTCTGCCAGGCTTTGCTGTGCTTTATTCTGGGTATTGGCTTCCTCTCCAGGCTGGTGGAAAGATGGC	TTGAACTGGTCTGAACACCAAGGGCAGAGGCTGAGAGCCTCCAGGCGTAGAATGTCAGGTCCCGCTCTGCTTCTCTGCCAGGCTTTGCTGTGCTTTATTCTGGGTATTGGCTTCCTCTCCAGGCTGGTGGAAAGATGGCTGAACTGGTCTGAACACCAAGGGCAGAGGCTGAGAGCCTCCAGGCGTAGAATGTCAGGTCCCGCTCTGCTTCTCTGCCAGGCTTTGCTGTGCTTTATTCTGGGTATTGGCTTCCTCTCCAGGCTGGTGGAAAGATGGC	ENSSSCG00000010943	intron_variant	MODIFIER	AOPEP	protein_coding	INTRON=5/17,STRAND=-1	acceptor,ESE
sv_18328	10	40962470	40962609	139	DEL	CTCCTGAGATGAACCAAACAGCTGCCTCTGCGCCACCCAGAGAAAGAGACTCCCCCCAACCCCCCCGACCCAGGATTTGTGTCCCTTTACCAGGCTGTCAGGTTTTATTGGGCAGGTGGTTTTCATTTTTTAATTTATTT	C	ENSSSCG00000011020	intron_variant,feature_truncation	MODIFIER	JCAD	protein_coding	INTRON=1/3,STRAND=1	ESE,Polyadenylation sites,Terminal Oligopyrimidine Tract (TOP)
sv_18331	10	41239658	41239931	273	DEL	GAAAAAAAAATCTGGGAGTTCCCATCGTGGTGCAGTGGTTAACGAATCTGACTAGGAACCATGAGGTTGCAGGCTCGATCCCTGGCCTTGCTCAGTGGGTTAAGGATCCAGTGTTGCCGTGAGCTGTGGTGTGGGACGCAGACGTGGCTCGGATCTGGCATTGCTGTGGCTCTGGCGTAGGCCGGCGGCTACAGCTCCGATTAGACCCCTAGCCTGGGAACCTTCATATGCCACGGGAGCAGCCCTAGAAAAGGCAAAAAGACCAAAAAAAAAA	G	ENSSSCG00000011022	intron_variant,feature_truncation	MODIFIER	SVIL	protein_coding	INTRON=2/40,STRAND=1	ESS,RNA C-to-U editing site,ssc-miR-383
sv_18339	10	41745166	41745452	286	DEL	TATTGGGAGTTCCCGTCGTGGCGCAGTGGTTAACAAATCCGACTAGGAACCATGAGGTTGCGGGTTCGATCCCTGCCCTTGCTCAGTGGGTTGAGGATCCGGCGTTGCCATGAGCTGTGGTGTAGGTTGCAGACACGGCTCGGATCCCACGTTGCTGTGGCTCTGGCGTAGGCCGGTGGCTACAGCTCCGATTCAACCCCTAGCCTGGGAACCTCCATATGCCGCGGGAGCGGCCCAAGAAATAGCAACAATAACAACAACAACAAAAAAGACAAAAAAAAAAAAAA	T	ENSSSCG00000011023	intron_variant,feature_truncation	MODIFIER	ZNF438	protein_coding	INTRON=1/9,STRAND=-1	ESE,ESS,Polyadenylation Signal (PAS),functional RNA sequences
sv_18437	10	46635869	46635869	117	INS	G	GCTGGGAACCAGCATCTGCTCTGGGCCTAGGCACTGGCATCAGCTGATATACACGTACAGGCTGACTGGGGGAATGATATGGAAGTCTGAAGCTACTTAAGAAGGTGCTGGTCTAATA	ENSSSCG00000026499	intron_variant,feature_elongation	MODIFIER	NMT2	protein_coding	INTRON=6/17,STRAND=1	ESE
sv_18495	10	49134824	49134965	141	DEL	GGCAGGTGCCCTATCATAAGTGCACGTCACAGCATCCCCAGTGACCTCTGACACATACACATACTGGTCGAGCTAAGGCCAGAGGCTCGCTCTGTTTCCACCTCAGGTGGGTGGACCAAATTCAGTCCTGGTCAGAGGCTCA	G	ENSSSCG00000030156	intron_variant,feature_truncation	MODIFIER	APBB1IP	protein_coding	INTRON=11/13,STRAND=-1	ESE
sv_18529	10	51017643	51017710	67	DEL	GTGGCATTTAGAACCACCATATCTGGAAAATGCATCAAACTTGTGTTATCTGCATGCCTCCTTACGGC	G	ENSSSCG00000011075	intron_variant,feature_truncation	MODIFIER	KIAA1217	protein_coding	INTRON=2/20,STRAND=-1	ESE
sv_18592	10	55269537	55269818	281	DEL	TAAGAAAATAAGGAGTTCCCGTCGTGGCGCAGTGGTTAACGAATCCGACTAGGAACCATGAGGTTGCGGGTTCGGTCCCTGCCCTTGCTCAGTGGGTTAATGATCTGGCGTTGCCGTGAGCTGTGGTGTAGGTTGCAGACGTGGCTCGGATCCTGCGTTGCTGTGGCTCTGGCGTAGGCCGGTGGCTACAGCTCTGATTTGACCCCTAGCCTGGGAACCTCCATATGCCGCGGGAGCGGCCCAAGAAATAGCAAAAAGACAAAAAAAAAAAAAAAAAAAAAA	T	ENSSSCG00000040615	intron_variant,feature_truncation	MODIFIER	-	protein_coding	INTRON=15/40,STRAND=-1	ESE,ESS,C-to-U RNA editing sites,ncRNA hybridization regions
sv_18789	11	675119	675173	54	DEL	GTTTGATGAGATCCCATTGATTTATTTTTGTCTTTATTTCCAAGAAGAGATTTTC	G	ENSSSCG00000021814	intron_variant,feature_truncation	MODIFIER	ZMYM2	protein_coding	INTRON=2/23,STRAND=1	C-to-U RNA editing sites
sv_18801	11	1486020	1486262	242	DEL	CAGTCCACACAAACTGTTAACATCCTGCTCTTGAGCTAATATTTCTCTTTTTCCTCATTTTTTTATTTTTATGGCTGCACCTGTGGCATATGGAAGTTCCCAGACTAGAAGATGAATCAGAGCTGCAACTGCTGGCCTATGCCACAGTCACAGCCACAGCCACACTGGATCCGAGCCACGTCTATGACCTACAGTGCAGCTTGCAGCACTGACGGATCCTGAACACACTGAGTGAGGCCAGGG	C	ENSSSCG00000024667	intron_variant,feature_truncation	MODIFIER	MICU2	protein_coding	INTRON=1/10,STRAND=-1	acceptor,ESE,ssc-miR-4331
sv_18886	11	5651917	5651917	53	INS	A	AGAGGGAGCCGAAGTGGTCACACTTTTCTGATTTTGAGGGTTGGGGATGGGGAG	ENSSSCG00000009320	intron_variant,feature_elongation	MODIFIER	FLT1	protein_coding	INTRON=16/28,STRAND=-1	ssc-miR-652
sv_19024	11	14379468	14379468	54	INS	C	CTCCAGGGTGAAAGAAGGTAGGTTGGTCAAAGTATTAAAGGATATGCAAGATTAG	ENSSSCG00000037746	intron_variant,feature_elongation	MODIFIER	NHLRC3	protein_coding	INTRON=12/12,STRAND=1	Polyadenylation Signal (PAS),ncRNA hybridization regions
sv_19032	11	14726025	14726085	60	DEL	TGAGTTAATCAAGGGACCCTGCGTAGTTCGCAGCTTCCCGGGCGTTTACACCCTAGGCCTG	T	ENSSSCG00000009369	intron_variant,feature_truncation	MODIFIER	COG6	protein_coding	INTRON=21/23,STRAND=1	ESE,Musashi binding element (MBE)
sv_19045	11	15561033	15561125	92	DEL	GCTTCAGGGAGTTAAACACATGAGGAACAGCAGTGGAATGGCATAGCGTCATGTGTCAAGCTGCATGGAAGACTAAGCGTGGTGATGTATACA	G	ENSSSCG00000009374	intron_variant,feature_truncation	MODIFIER	-	protein_coding	INTRON=15/17,STRAND=-1	ESE
sv_19113	11	19580417	19581202	785	DEL	GATGGGGAGGAAGAAAAGTTGTGAGCTTGCAGCCTAGTGGGAAGGTTCCTTTTCCTCCTGGGGGGGGGGGGGGGGGCAACTCTGCCCCCAAACCACGTGACAGAATTAGTCCAAGAGACTAAGAGTGACCCTGGAGGAGGTACTGGGGTGTTTCTGCCCAGTTCAAGACGGAGCTGGGCATCAGAGCGGAGGTGCCGGAGGGAAAGAGCTCTTGGGTAAGTCAAAATGTGTCCCTTGGTGTTTATGAAATGAATATGCATACAGACGCTGACGCTCATTCCCACTTTAGGAGTCTGGATGGCAGGCAACTGGCTAAAGCAACTCTGGATGGCTGAGCAGGGAAAAGGGGCAGCCGTGAAAGCATCATTCTCCATGTGCTTCCTTTGGGCCAAGCAGGTG…	G	ENSSSCG00000027551	intron_variant,feature_truncation	MODIFIER	NUDT15	protein_coding	INTRON=2/3,STRAND=-1	donor,acceptor,ESE,ESS,Musashi binding element (MBE)
sv_19258	11	25656407	25656471	64	DEL	GCCACAGCAACGTCAGATCCGAGCCCCATCTGTGACCTATACCACAGCTCACAGCAACGCCGGAT	G	ENSSSCG00000031378	intron_variant,feature_truncation	MODIFIER	KBTBD6	protein_coding	INTRON=1/1,STRAND=1	ESE,RNA C-to-U editing site
sv_19512	11	45097273	45097551	278	DEL	TAGAAATAACAATCAGGAGTTCCCGTGGTGGCGCAGTGGTTAATGAATCCGACTAAGAACCATGAGGTTGAGGGTTCGGTCCCTGCCCTTGCTCAGTGGGTTAAGGATCGGCGTTGCCGTGAGCTGTGGTGTAGGTGCAGACGTGGCTTGGATCCGCGTTGCTGTGCTCTGGCGTAGGCCGGTGGCTACAGCTCCGACTCGACCCCTAGCCTGGGAACCTCCATATGCCGCGGGAGCGGCCCAAGAAATAGCAACAACAACAACAACAACAACAACAAA	T	ENSSSCG00000024722	intron_variant,feature_truncation	MODIFIER	PIBF1	protein_coding	INTRON=5/16,STRAND=1	acceptor,ESE,ESS,Polyadenylation Signal (PAS),C-to-U RNA editing sites
sv_19556	11	47587630	47588182	552	DEL	GAGGTACTATATTTGATATATATATATTTGATATATCACACACAATTATATTTTAGCTACTAAACAATTAAATAAAATTAAGCTTTTAAGAATCAAGTCCTGGTAAGGTGAAACAAAACATTTGCATACTTGCTTTCCTTTAGCATTTCAACGTTGTGCAAATGAACCTACCACTCAATAACTGTGATATTAAAGATATCTTGCCTTCTTTTTCTCAGCCTGCTTAAAAACAATAAACTACATGTTTTTAATAATTCAGAATAGTGGTCCTGGAGAAGGATGCTTAATCTGAATTTCAAATTTCAAATTAACCTGAGCTTTAAATAGTACCTTAGGAGTTCCCTACGTGGCTCAGTGGTTAACAAACCCGACTAGGATCCACAAGGATGCAGGTTCGAT…	G	ENSSSCG00000009464	intron_variant,feature_truncation	MODIFIER	COMMD6	protein_coding	INTRON=12/19,STRAND=-1	acceptor,ESE,Polyadenylation sites,K-Box (KB),Brd-Box (Brd),Musashi binding element (MBE),C-to-U RNA editing sites
sv_19561	11	47935709	47935787	78	DEL	TTAAAAGGTTTTTCAATGTATACATCTAAGGATAACCTGACCCCCTTGCTGTACAGTGGGAAAATAAAAAAAAAATAAA	T	ENSSSCG00000040184	intron_variant,feature_truncation	MODIFIER	LMO7	protein_coding	INTRON=2/31,STRAND=1	ESE,Polyadenylation Signal (PAS)
sv_19800	11	63749844	63750144	300	DEL	TGTAATTCTTTTTTTTTTTTTTTTTTTTTTGTCTTTTGTCTTTTGTTGTTGTTGTTGTTGCTATTTCTTGGGCCGCTCCCGCGGCATATGGAGGTTCCCAGGCTAGGGGTTGAATCGGAGCTGTAGCCACTGGCCTACGCCAGAGCCACAGCAACGCTGGATCCGAGCCGTGTCCGAGACCTACACCACAGCTCACGGCAACGCCGGATCATTAACCCACTGAGCAAGGGCAGGGACCGAACCCGCAACCTCATGATTCCTAGTCGGATTCGTTAACCACTGCGCCACGACGGGAACTCCA	T	ENSSSCG00000009492	intron_variant,feature_truncation	MODIFIER	GPR180	protein_coding	INTRON=7/7,STRAND=1	ESE,SXL binding site
sv_19863	11	67916585	67916653	68	DEL	GTGGGGCCCCGAGACGTGGCACTCTGCATGAAGCCCCAGCCCCCCAAGAGAACACGTCACTCATGTCCT	G	ENSSSCG00000022112	intron_variant,feature_truncation	MODIFIER	DOCK9	protein_coding	INTRON=2/53,STRAND=-1	ESE
sv_19905	11	69317806	69317907	101	DEL	TATAAAAATATGCAATACACTGGGGTAAAGGTAAACACCACCGCCACATTCAGAATTCTCTAATACTGTAACTTGGTGTGTTAACCGCTTAACTGTGGTATA	T	ENSSSCG00000009523	intron_variant,feature_truncation	MODIFIER	-	protein_coding	INTRON=1/1,STRAND=-1	ESE
sv_19937	11	70810143	70810939	796	DEL	GCTCCTTCTAGGTACCAGGCACCATGGTTGGCAGAATGGCTTTACAGTGACCCGAAAAATACACACTGCCCTTAGAGAACTCCAGCATAAGCGAGTTAGTCATCGTATGATGACAGTCAAATAATTACACCATGCAAAGTGTCCTGAAGGAGAAGAAGGGGTGCTCCAGAGGAGCCTGGCCGGGTGTCACGGCAGAGCTCTCTGAGGTGGTGACGTGGTCACGTGCAAGCCGACACCTGCAGGATGACCCTTGGCAAGGAGGGTGGGGGCCGGGCTTTGGAAAGGTGGAAGGCAGCCCTAGAGGAGGAGCAGAGTGGGGAGCGAGCAGGGCCTGTCGCAGAAATCACGTGACGTCCTCCCTCCCATTGCTTAAGCAGCAGCTGCTTGCCTCTTCCCCAT…	G	ENSSSCG00000009527	intron_variant,feature_truncation	MODIFIER	FGF14	protein_coding	INTRON=1/4,STRAND=-1	ORF,donor,acceptor,ESE,Musashi binding element (MBE)
sv_19989	11	74911632	74911687	55	DEL	TTTATACATGGTTCAATTATGTTTTCTCTAGGTTTACAGGAAAAAGTATGTGGGAA	T	ENSSSCG00000040130	intron_variant,feature_truncation	MODIFIER	FAM155A	protein_coding	INTRON=1/2,STRAND=-1	ESE
sv_20006	11	75835792	75836116	324	DEL	TAAGATGTGTAAGATCGGAGTTCCCGTCGTGGCGCAGTGGTTAATCGTGGCGCAGTGGTTAACGAATCTGACTAGGAACCGTGAGGTTGCGGGTTCGATCCCTGCCCTTGCTCAGTGGGTTAACGATCCGGCGTTGCCGTGAGCTGTGGTGTAGGTTGCAGACGCGGCTTGGATCCCGCGTTGCTGTGGCTCTGGCGTAGGCTGGCAGCTACAGCTCCGATTGGACCCCTAGCCTGGGAATCTCCATATGCCACGGGAGTGGCCCAAAGAAACAGCAAAAAGACAAAAAAAATAAAAATAAAATAAAAAAAAAAAAAAAAAAAAA	T	ENSSSCG00000009543	intron_variant,feature_truncation	MODIFIER	-	protein_coding	INTRON=1/25,STRAND=1	acceptor,ESE,Polyadenylation Signal (PAS),functional RNA sequences
sv_20057	12	1754287	1754351	64	DEL	TGCGACAAGGGACTCCGGAAACACGGTCTGAAGGCCAGGGCGTGATGCCCTCGTCCTCGCAGACA	T	ENSSSCG00000017139	intron_variant,feature_truncation	MODIFIER	RPTOR	protein_coding	INTRON=11/31,STRAND=-1	ESE
sv_20067	12	3320496	3320773	277	DEL	GTCTGCATGTCCTCACCAGGACCCCGTGTCGCTGCCCGCAGGTCACCAGGGCAGCTTCTGCATGTCCTCACCAGGACCCCGTGTCGCTGCCCCGCAGGTCACCAGGGCAGCTTCTGCATGTCCTCACCAGGACCCCCGTGTCGCTGCCCGCAGGTCACCAGGGCAGCTTCTGCATGTCCTCACCAGGACCCCGTGTCGCTGCCCGCAGGTCACCAGGGCAGCTTCTGCATGTCCTCACCAGGACCCCGTGTCGCTGCCCGCAGGTCACCAGGGCAGCT	G	ENSSSCG00000017165	intron_variant,feature_truncation	MODIFIER	-	protein_coding	INTRON=3/13,STRAND=1	acceptor,ESE
sv_20089	12	4851598	4852302	704	DUP:TANDEM	TATATTGGAATCCACTCTAATTACCTTAAAGTGGGACCCTCTCCGCTCAACTACTAACTGCAAGGGAACCCCCCACCCACCCAATTTCCTAAAATCGAGATACTTGCTGCTGAAACCAGCAAGTGGAACCTTCTCTACCAATCACCTTAAAGTGGGACCCTCTCTGCTCAACCTCATACACTTGGGACCTTCCTTCTGAACTACCTACAAGTGGAACCCATGCTGTCCAATTATTTTTAGAAGCAGTGTTCTTTGCTCAACCAGATACAAATGGGACCTCTCTGCCCAACTACCTACAAGTGGAACCTCCCTAAACAATGGCCTTAAGTGGGCCCTTCCTGCTCACCTTCATAAAGTGGGACCCTGTCTACTCAGCTAACAACTAGTGGAACTCTCCCT…	TATATTGGAATCCACTCTAATTACCTTAAAGTGGGACCCTCTCCGCTCAACTACTAACTGCAAGGGAACCCCCCACCCACCCAATTTCCTAAAATCGAGATACTTGCTGCTGAAACCAGCAAGTGGAACCTTCTCTACCAATCACCTTAAAGTGGGACCCTCTCTGCTCAACCTCATACACTTGGGACCTTCCTTCTGAACTACCTACAAGTGGAACCCATGCTGTCCAATTATTTTTAGAAGCAGTGTTCTTTGCTCAACCAGATACAAATGGGACCTCTCTGCCCAACTACCTACAAGTGGAACCTCCCTAAACAATGGCCTTAAGTGGGCCCTTCCTGCTCACCTTCATAAAGTGGGACCCTGTCTACTCAGCTAACAACTAGTGGAACTCTCCCT…	ENSSSCG00000037376	intron_variant	MODIFIER	-	protein_coding	INTRON=3/3,STRAND=1	ESE
sv_20094	12	5242599	5242945	346	DEL	ATCAAAGATACAACACCATTGGTCCAAAAATAGATGGTTGAAGATTAGTATTTTTCATTTATAGGCAGGATATTTGTTTAACTAATTTTACTGTGACTTCTTTTTTTTTTTTTTTTTTTTTTTTTTGTCTTTTTGCTATTTCTTTGGGCCGCTCCCGCGGCATATGGAGGTTCCCAGGCCAGGGGTCGAATCGGAGCTGTAGCTCCCGGTCTACACCAGAGCCACAGCAACTCGGGATCTGAGCCGAGTCTGCAACCCACACACCACAGCTCCTGGCAACACTGGATCGTCAACCCACTGAGCTAGGGCAGGGACCGAACCCACAACCTCATGGTTCCTGGTCGGAT	A	ENSSSCG00000017186	intron_variant,feature_truncation	MODIFIER	RNF157	protein_coding	INTRON=1/19,STRAND=1	ESE,SXL binding site,Musashi binding element (MBE)
sv_20103	12	5742910	5743176	266	DEL	CCCTGCATCCTTTTTTTTTGTTGTTGTTGTTATTTCTTGGGCCGCTCCTGCGGCATATGGAGGTTCCCAGACTAGGGGTTGAACCGGAGCTGTAGCCACTGGCCTACACCAGAGCCACAGCAACGCGGGATCCGAGCCGCGTCTGCGACCTACACCACAGCTCACGGCAACGCCAGGTCCCCAACCCACTGAGCAAGGGCAGGGACCGAACCCGCAACCTCATGGTTCCTAGTCGGATTCGTTAATCACTGCGCCACAACGGGAACT	C	ENSSSCG00000023978	intron_variant,feature_truncation	MODIFIER	RECQL5	protein_coding	INTRON=7/19,STRAND=1	donor,ESE,Terminal Oligopyrimidine Tract (TOP),C-to-U RNA editing sites
sv_20105	12	5792006	5792458	452	DEL	ACCCCTAGCCTGCGAACCTCCATATCCTGCAGGTGCAGCCCTAAAAAGACAAAAAAAAAAAAAAAAAAAAAAAGGTGGAAAATAACAAGTACTGGCAAGGATGCAGAGAAACTGGGATCCCCGGGCATTCCTGGTGGGAGTATAAAATGGAGCAGCCACTGAGGAAAGTGGTTTGATGACTCCTCAAAAAGGAAACACAGAATTACCACGTGACCCAGCACACCCACTCCTAGGTAAATATGCAAAAGAACTGAAAGCAGAGGAGCTCCCTTCATGGCTCAGCAGTTAATGAACCGACTAGGATCCATGAAGATGCGAGTTTGATTCCTGGCCTCGCTCAGTGGGTTAAGGATCCAGCATTGCTGTGAGCTGTGGTGTAGGTCTCATAGACACGGCTTG…	A	ENSSSCG00000034198	intron_variant,feature_truncation	MODIFIER	-	protein_coding	INTRON=14/22,STRAND=-1	donor,ESE,K-Box (KB),C-to-U RNA editing sites
sv_20334	12	17152095	17152095	54	INS	A	ATGGCATATGGAGGTTCCCAGGCTACAGGTCGAATCAGAGCTACAGCTCCGGCCT	ENSSSCG00000017311	intron_variant,feature_elongation	MODIFIER	MAPT	protein_coding	INTRON=1/11,STRAND=-1	ESE
sv_20346	12	17659189	17659247	58	DEL	CCGAATCTTTTTTTTTTTTTTTTTTTTTTTAATTTTTTTAGGGCCGCGCCCAGGGCATA	C	ENSSSCG00000017317	intron_variant,feature_truncation	MODIFIER	WNT3	protein_coding	INTRON=1/4,STRAND=-1	SXL binding site
sv_20390	12	20667829	20667898	69	DEL	CATGGAGCAGCACAAAAAAAAAAAAAAAAAAAAAAAAAAAAAGCTCCTCTGTCATGTGAAGAATAGGAGA	C	ENSSSCG00000028051	intron_variant,feature_truncation	MODIFIER	ZNF385C	protein_coding	INTRON=2/9,STRAND=1	ESE
sv_20582	12	34873812	34873875	63	DEL	AGACCCGTTAGGCGGCCAGCCTTGGGGAGGGCCAGCGATGACACGGGTGAAGGCCACAGCAGTG	A	ENSSSCG00000017645	intron_variant,feature_truncation	MODIFIER	TEX14	protein_coding	INTRON=7/34,STRAND=-1	ESE
sv_20680	12	39700050	39700361	311	DEL	GCTCAGTGAGTTAAGGATCCAGCGTTGCTGTGAGCTGTAGTATAGGTCACAGCCAGGGCTCGGATCCCCAAGTTGCTGTGGCTCTGGTGTAGGCTGGCGACTACAGCTCCAATTAGACCCTAGCCTGGGAACGTCCATATACCGCGGGTGCGGCCCTGAAAAGAAAAAAAAAAAAAAAAAAAAAAAGTGTTAAATCAGTTAACAGAAGATGGCCTGCAGTTAAGAATCTTTCTTTCAGGAGTTCCCATCATGGCTCAGAGGTAATGAACCCAACCAGTATTCATGAGGATGCAGGTTCGATCCCTGGCCTCA	G	ENSSSCG00000017707	intron_variant,feature_truncation	MODIFIER	TAF15	protein_coding	INTRON=7/15,STRAND=-1	ESE,Musashi binding element (MBE)
sv_20729	12	42620473	42620473	79	INS	A	AGTCCAGCACACAAACATACCATATAGTGAAAGAGCCATTAAAGGAAAACACAGTTTTAACATTTGCAAAAGAATTCCCT	ENSSSCG00000017733	intron_variant,feature_elongation	MODIFIER	C17orf75	protein_coding	INTRON=8/10,STRAND=1	Musashi binding element (MBE),C-to-U RNA editing sites
sv_20732	12	42735018	42735018	72	INS	C	CACACAGCTGCTGTAAGATCTAGAGTGGGACATTTTATATTATTTGTTTCCCATGTTACATATTATATGGCTA	ENSSSCG00000017735	intron_variant,feature_elongation	MODIFIER	RHOT1	protein_coding	INTRON=13/18,STRAND=-1	ESE
sv_20781	12	45369577	45369577	66	INS	T	TTGAACCCGGTTGACGGTCAGGTTCATCACTGCTGAGCCACAATGGGGACTCCCCACCTTTTTTTTA	ENSSSCG00000017783	intron_variant,feature_elongation	MODIFIER	-	protein_coding	INTRON=17/43,STRAND=-1	ESE
sv_20923	12	53260540	53260597	57	DEL	TCTGGGCCTTGCCCCTTTCATTTTGTCACGATTTTACTTTTTTTTTTTTTTTGCTGCA	T	ENSSSCG00000017978	intron_variant,feature_truncation	MODIFIER	ALOX15B	protein_coding	INTRON=1/16,STRAND=1	SXL binding site
sv_20942	12	54137827	54137827	81	INS	C	CTGCTGATTGGTTGGGGAAAGAGGGGGTCTTAACGATACACTTGCTGATTGGTTGGGTAAAGAGGGGTCTTAACGATACACT	ENSSSCG00000017993	intron_variant,feature_elongation	MODIFIER	NTN1	protein_coding	INTRON=2/7,STRAND=1	ESE
sv_20944	12	54215145	54215369	224	DEL	GGAGTTCCCTGATGGCCAAGCAGTTAAGGGTTCAGCGTAGTAGTCACTGCTGTGTGTGGGTTCAGTTCCTGGCCTCACTCAGTGGGTTAAGGATCTGGCATTGCCGTGAGCTGTGGTGTAGGTAGGATCCCACGTGGCTGTAGCTCTGATTCGACCTCTAGCCTGGGACCTTCCACATGCTGCAGGTGCGGCCCTAAAAGGCAGAAAAAAGCAAACCAGAACTCC	G	ENSSSCG00000017993	intron_variant,feature_truncation	MODIFIER	NTN1	protein_coding	INTRON=2/7,STRAND=1	ESE,Musashi binding element (MBE)
sv_21044	12	59897867	59897867	51	INS	A	AAGGGTTCCTTCCTCATGGGCTGCTTCTCGGGGAGGCCTTGGCGAGGATCAG	ENSSSCG00000018044	intron_variant,feature_elongation	MODIFIER	ALDH3A1	protein_coding	INTRON=1/10,STRAND=1	ESE
sv_21056	12	60547374	60547456	82	DEL	AGCAGGCACAGGCTCTGTGAGGGGGCGGGGTCTGTGGGTGGGGTGGGGTCAGGAGGGTCTGCCGTGACTCCTGTCTTACAACG	A	ENSSSCG00000032392	intron_variant,feature_truncation	MODIFIER	-	protein_coding	INTRON=24/36,STRAND=-1	ESE
sv_21068	12	61321665	61322460	795	DEL	GGCAACCTACACCACAGCTCACAGCAACCCCAGATCCTTAACCCACTGAGCAAGGCCAGGGATTGAACCCGCAACCTCATGGTTCCTAATCGGATTTGCTAAACACTGAACCACAACGGGAACTCCTGACAATTTATTTTTAAAATAACTTTTGGGCGTCATATACACGTATGTTTCTTGAACATGATACTTCTCAGAGTTCTCTTGTGGTGCAATGGGTTAAGGATGCAGCGTCGTCACTGCAGCAGATTGGGTTGCTGCTGTGGCGCAGTTTCTGTCCCTGGCCTGGGAACTTCGAGCTGCTACATGCATGGCCAATACCCCCCAAAATTTGCTCTTCTTAGTGGAATTACAAAGACGTGTGTTTTTCTTCTTTCAGCCTGTGTGTGGGGAAAACAA…	G	ENSSSCG00000031802	intron_variant,feature_truncation	MODIFIER	DHRS7B	protein_coding	INTRON=1/7,STRAND=1	ORF,acceptor,ESE,ESS,Polyadenylation sites,AU-rich class-2 Element (ARE2),SXL binding site,Musashi binding element (MBE),long stems,functional RNA sequences, ssc-miR-532-5p
sv_21364	13	2269217	2269321	104	DUP:TANDEM	TGTCCACATCAGACTCCCTTTACTCCTTCAGTGACAAATGGGCAGATGTTCCTCAGGGCTCCCAGGAGGATGTCTCACCCACTTTTAAACTGAGAAACCAAGGTC	TGTCCACATCAGACTCCCTTTACTCCTTCAGTGACAAATGGGCAGATGTTCCTCAGGGCTCCCAGGAGGATGTCTCACCCACTTTTAAACTGAGAAACCAAGGTCCACATCAGACTCCCTTTACTCCTTCAGTGACAAATGGGCAGATGTTCCTCAGGGCTCCCAGGAGGATGTCTCACCCACTTTTAAACTGAGAAACCAGGGTCCACATCAGACTCCCTTTACTCCTTCAGTGACAAATGGGCAGATGTTCCTCAGGGCTCCCAGGAGGATGTCTCACCCACTTTTAAACTGAGAAACCAAGGTC	ENSSSCG00000038215	intron_variant	MODIFIER	-	protein_coding	INTRON=35/37,STRAND=-1	acceptor,ESE,Polyadenylation Signal (PAS)
sv_21561	13	11123913	11123969	56	DEL	GGATGGGAGTGTTGGTGGGAATGTGCTCTCAGCATCGACTTCCCGGTGCTGAGGCTC	G	ENSSSCG00000036033	intron_variant,feature_truncation	MODIFIER	THRB	protein_coding	INTRON=1/9,STRAND=-1	-
sv_21770	13	22765668	22765668	57	INS	G	GGGGTTCAGCTAAATAGTGAGGATGGATGAAAGACAGGAATTCATGGTCTCTGCTTTA	ENSSSCG00000028740	intron_variant,feature_elongation	MODIFIER	CTDSPL	protein_coding	INTRON=2/8,STRAND=1	ESE,Musashi binding element (MBE)
sv_21847	13	27613907	27613994	87	DEL	AAAAAAACTGTGCTGATAAAGAGAAGCCTTGCACCTACTAGCTTCACTGCTGAGTTCTGCCAGACATTTAAAGAACTAGTATCAATCC	A	ENSSSCG00000029268	intron_variant,feature_truncation	MODIFIER	TOPAZ1	protein_coding	INTRON=7/18,STRAND=1	ESE,Polyadenylation Signal (PAS)
sv_21901	13	34435410	34435471	61	DEL	TCCCAGCCCCTTTCTCTTGCTCTGTCCACACTTGCTGCTGCAGTCAGCTGTCAGCATTTATG	T	ENSSSCG00000011432	intron_variant,feature_truncation	MODIFIER	GLYCTK	protein_coding	INTRON=1/4,STRAND=1	ncRNA hybridization regions
sv_21917	13	36747600	36748191	591	DEL	GGCAAACATCTATGTCATTGGGTTTAAGATATAAGTCCTGTTGATCCCACTCCCCAAATATTCAAGTCTTCTTCCTCCTCACTGTTTGTGAGGTGCCATCCACCCTCTCCCCTAGACTATGCCTATAGACTCCCCATTGGTCTTTTGGTTTTACAGCTCTGGGCTTTCTCTCTGTCTTTCTTTCAATTTCTTGGAGATGAGCACCCAGTCACCATCTGCCATCAGAGCCCTCACTTGTTTCCTGGCTGCCTCATACCTAATCTTTGGGTCTTAACTTTTAAATCCCTGCCTTGACTCCCACATAGAAAGAGACCACCTGTTACTCTCTTATAGAATCAGTTCTTAATCTAGATAGAACTTAGCACAGCTTATTATTGCATATTGCTTGGGCAAACTAGC…	G	ENSSSCG00000027019	intron_variant,feature_truncation	MODIFIER	CACNA2D3	protein_coding	INTRON=13/36,STRAND=1	acceptor,ESE,ESS,SXL binding site,Musashi binding element (MBE)
sv_21927	13	38449828	38449909	81	DEL	GGGTTCGATCCCTGGCCTTGCTCCGTGGGTTAAGGATCCGGCTTTGCCATGAGCTGTGGTGTAGGCCAACAGCTCCAGTTCT	G	ENSSSCG00000021439	intron_variant,feature_truncation	MODIFIER	CCDC66	protein_coding	INTRON=3/17,STRAND=1	ESE
sv_22004	13	46053314	46053314	53	INS	A	ACAACAGATGATTCGATTAAGAAGATGTGGTATATATGCACAATAGATGTCCAT	ENSSSCG00000011496	intron_variant,feature_elongation	MODIFIER	ADAMTS9	protein_coding	INTRON=36/38,STRAND=-1	Polyadenylation Signal (PAS)
sv_22017	13	49014395	49014678	283	DEL	AAAATAATTAAATTTTGGAGTTCCCGTCGTGGCGCAGTGGTTAACGAATCCGACTAGGAACCATGAGGTTGCGGGTTCGATCCCTGCCCTTGCTCAGTGGGTCAAGGTTCCGGCGTTTGCCGTGAGCTGTGGTGTAGGTCACAGACGCGGCTTGGATCCTGCGTTGCTGTGGCTCTGGCGTAGGCTGGCAGCTACAGCTCCGATTCGACCTCTAGCCCGGGAACCTCCATATGCCGCAGGAGCGGCCCAAGAAATGGCAAAAAGACAAAAAAAAAAATAATAAT	A	ENSSSCG00000011501	intron_variant,feature_truncation	MODIFIER	SUCLG2	protein_coding	INTRON=2/9,STRAND=-1	acceptor,ESE,C-to-U RNA editing sites,functional RNA sequences
sv_22019	13	49453546	49453846	300	DEL	ACTTTTTTTTTTTTTTTTGTCTTTTGTCTTTTTTGTTGTTGTTTTGTTGTTGTTGTTGCTATTTCTTGGGCCGCTCCCGCGGCATGTGGAGGTTCCCAGGCTAGGGGTTGAATCGGAGCTGTAGCCACCGGCCTACGCCAGAGCCACAGCAACGCGGGATCCGAGCCGCGTCTGCGACCTACACCACAGCTCACGGCAACGCCGGATCGTTAACCCACTGAGCAAGGGCAGGGATCGAACCCGCAACCTCATGGTTCCTAGTCGGATTCGTTAACCACTGCGCCACGACGAGAACTC	A	ENSSSCG00000042118	intron_variant,feature_truncation	MODIFIER	TAFA1	protein_coding	INTRON=1/3,STRAND=1	ESE,SXL binding site,C-to-U RNA editing sites
sv_22102	13	57796419	57796419	67	INS	T	TTGCTGTGGCTGTGGTGTAGGCTAGCAGCTATAGCTCCCATTGGACCCCTTGCCTGGGAACCTCCATG	ENSSSCG00000038152	intron_variant,feature_elongation	MODIFIER	CNTN6	protein_coding	INTRON=2/23,STRAND=1	-
sv_22326	13	86699227	86699731	504	DEL	TCACGTTATTCTCCATCATGCTCCATCACAAGTGATTAGATATAGGTCCCTGTGCTATACAGCAGGCTCTCATTGCTTAGCCACTCCAGATGCAATAATTGGCATCTACTAACCCCAAACTCCAGTCCATCTCAGTCCCTCCCCCTCCTCTCTTGGTAACCACAAGTCTGTTCTCTATGCCCACGAGTTTGTTTCTGTTCTGTAGATAGGTTCATTTATGCCATATTTTAGATTCCACATGTAAGTGATGTCATATGGTATTTGTCTTTATCTCCTGACTTACTTCCCTCTGTATGAGAATCTCTAGTTCTATCCATGTTGCTGCAAATGGCATTGTAATTGCTTTTTATACCTAGCAGTATATCTTGGAAATATTCCTGAATTCTATAGGGCTGTCTC…	T	ENSSSCG00000035634	intron_variant,feature_truncation	MODIFIER	PLSCR1	protein_coding	INTRON=9/9,STRAND=-1	acceptor,ESE,Musashi binding element (MBE),Polyadenylation Signal (PAS)
sv_22499	13	112472094	112472383	289	DEL	TAAAATTCAAAATTTTGGAGTTCCCGTCGTGGCACAGTGGTTAACGAATCCGACTAGGAACCATGAGGTTGCGGGTTCGGTCCCTGCCCTTGCTTAGTGGGTTAACGATCCAGCGTTGCCGTGAGCTGTGGTGTAGGTTGCAGACGCGGCTCTGATCCTGCGTTGCTGTGGCTCTGGCGTAGGCTGGTGGCTACAGCTCCGATTCGACCCCTAGCCTGGGAACCTCCATATGCCGAGGGAGCGGCCCAAGAAATAGCAAAAAGACAAAAAAAAAAAAAAAAAAAAAAAAA	T	ENSSSCG00000011756	intron_variant,feature_truncation	MODIFIER	NLGN1	protein_coding	INTRON=2/4,STRAND=1	acceptor,ESE,ESS,C-to-U RNA editing sites,ncRNA hybridization regions
sv_22533	13	115406711	115406711	73	INS	A	ATAGGAATACCCATCATGGCACATCGGAAACGAATCTGACTAGGAACCATGAGATTGAGGGTTCCATCCCCGGC	ENSSSCG00000011760	intron_variant,feature_elongation	MODIFIER	TBL1XR1	protein_coding	INTRON=2/16,STRAND=-1	ESE,C-to-U RNA editing sites
sv_22572	13	121939152	121939152	59	INS	G	GTGCCAGACTGCCCCAGATACTGGGAATAAAAAATATTCCAATTTTGTCCTTTATAGTGC	ENSSSCG00000011782	intron_variant,feature_elongation	MODIFIER	ABCC5	protein_coding	INTRON=3/29,STRAND=-1	ESE,Musashi binding element (MBE),Polyadenylation Signal (PAS)
sv_22679	13	133322069	133322328	259	DEL	GAGGCCAGGGATTGAACCCACATCTTCTTGGATACCAGTCAGGTTCATTACCATTGAGCTACAAGGGAACTCCAGAAAAAAAAAAAAAAAATATATATATATATATATATATATATATATTTTTTTTTTTTTAGGGCTGCACATGAGGCATATGGAGGTTCCCAGGCTAGGGGTTGAATTGGAGCTGTAGCTGGATCCGAGCCACATCTGCGACCTACACCACAGCTCATGGCAATGGCGGATCCTCAATCCACTGAGTA	G	ENSSSCG00000011843	intron_variant,feature_truncation	MODIFIER	PAK2	protein_coding	INTRON=9/21,STRAND=-1	acceptor,ESE,ESS,SXL binding site,C-to-U RNA editing sites,cis-regulatory elements of ERPIN
sv_22719	13	137104024	137104685	661	DEL	CTGCATTAGGCTGTTACCTGTTTAATCACCTAGTGGTTAAGATATTGATGGACTGATTGTCAGAACTGAAGGGACCTTGGAACCATCTGGTTGCTGCAGCCCTGCCCTGAGCAGGTGCAAAGTGGACGCACAGAGAGGGGCAGGGTCGGCCAGGGTCACTTGGCAAGTTGAGCCATGAGCTTCCCAGCATCATAAAGGTTAATCCTGGCCCCCTGCCTCTTCACCAGCTCCTTCTTCAAGGCTCTGACCTCCCTCTTTCCCTGTGTTCAGTCCCTCTTTCCCTCTGGTCTTGCCGTGGTCAAGCTCCCCAGCCTGCTTTTCCCAATGGACAATTCCACTTTCTTCATCTCATGGCTATAAAAGCACACTGTATATTCACAAGAGCCAAAACATGGAAAC…	C	ENSSSCG00000027952	intron_variant,feature_truncation	MODIFIER	ADCY5	protein_coding	INTRON=12/20,STRAND=1	acceptor,ESE,Polyadenylation sites,C-to-U RNA editing sites
sv_22791	13	146185493	146185553	60	DEL	CTGAGCAAGGCCAGGGATCAAACCCACAACCTCATGCTTCCTAGTCGGGTTTGTTAACCAT	C	ENSSSCG00000011916	intron_variant,feature_truncation	MODIFIER	ATP6V1A	protein_coding	INTRON=2/15,STRAND=-1	ESS
sv_23453	13	200792235	200792509	274	DEL	TTTACCATCTTTTTTTTTTTTTTTTTGTCTTTTTGCTATTTCTTGGGCCGCTCCCACGGCATATGGAGGTTCCCAGGATAGGGGTTGAATCGGAGCTGTAGCCACCGGCCTACGCCAGAGCCACAGCAACGCAGGATCCGAGCCGTGTCTGCAACCTACACCACAGCTCACGGCAACGCCGGATCGATAACCCACTGAGCAAGGGCAGGGACCGAACCCGCAACCTCATGGTTCCTAGTCAGATTCGTTAACCACTGTGCCACGACGGGAACTCC	T	ENSSSCG00000012062	intron_variant,feature_truncation	MODIFIER	TTC3	protein_coding	INTRON=34/42,STRAND=1	ESE,SXL binding site,C-to-U RNA editing sites,ncRNA hybridization regions
sv_23470	13	201923082	201923165	83	DEL	CACACACCCCACCGTTAAATAACTTGGTTCCAAAATGAAGCAAAAGTCATAATTTCCTTTGACTGGGATGAGATTCCACTTGTG	C	ENSSSCG00000012066	intron_variant,feature_truncation	MODIFIER	KCNJ15	protein_coding	INTRON=2/3,STRAND=1	ESE,C-to-U RNA editing sites
sv_23472	13	202064894	202065098	204	DEL	TGGGTAATGTACTACATCCTAAAATCTATTAATAAATCACCATGTGTCATAGTAATATTACTATCACTCCTCTGGGAGTCTCGTTCCTGCCCTCATCCCTTGGAATGTTTTTCACCTTTGTTGGACCTTGAACTTCTCTTAACCCATCTTCACAGGAATTAACACAGTCCATGATGAAGCATAAACACCAAAAAAATGGTCCTGC	T	ENSSSCG00000022318	intron_variant,feature_truncation	MODIFIER	ERG	protein_coding	INTRON=4/11,STRAND=-1	ESE,Musashi binding element (MBE),Polyadenylation Signal (PAS),C-to-U RNA editing sites
sv_23536	13	205962894	205962985	91	DEL	CCCTGACCCGAGCCCTGGGTCCCGCTTCCTGGGCTGCTGGACAGGACGAGTCAGGGCTGGTCCCAGCCATGACCTGCGCCAGAAGGCACAGT	C	ENSSSCG00000030016	intron_variant,feature_truncation	MODIFIER	PDE9A	protein_coding	INTRON=1/16,STRAND=1	ESE,Terminal Oligopyrimidine Tract (TOP)
sv_23648	14	3466614	3466670	56	DEL	GAGAGAGAGAAGGAAAGAAAGAAAGAAGAAAGAAGAAAGAAAGAAAGAAAGAAAGAA	G	ENSSSCG00000033204	intron_variant,feature_truncation	MODIFIER	-	protein_coding	INTRON=15/22,STRAND=1	ESE,C-to-U RNA editing sites
sv_23714	14	6204082	6204240	158	DEL	AAATGATCTTCATTATTCTTTTTTTTTTTTTTTTTTTTTTTTTTTATTTTCCCACTGTACAGCAAGGGGGTCAGGTCATCCTTAGATGTATACATTGCAGTTACAGTTTTTCCCCCACCCTTTCTTCTGTTGCGACATGAGTATCTAGACATAGTTCTC	A	ENSSSCG00000009611	intron_variant,feature_truncation	MODIFIER	XPO7	protein_coding	INTRON=2/27,STRAND=1	ESE,SXL binding site,Musashi binding element (MBE)
sv_23851	14	13480959	13481039	80	DEL	CCTGACAGCAGACAGTGTATCTTGCAGCCTGCAGGCAGATGCTGTGCCATGGAGGGGCAATGCGCTTCCTGCTGGAGGCCA	C	ENSSSCG00000009684	intron_variant,feature_truncation	MODIFIER	PRSS55	protein_coding	INTRON=3/7,STRAND=1	ESE
sv_23941	14	20170426	20170739	313	DEL	TCTGTCCTTTGGTTTCTTTTTTTTTTTTTTGATACTTTTTTGTTGTTGTTGTTGTTGTTGTTGTTGTTATTGTTGCTATTTCTTGGGCCGCTCCCGCGGCATATGGAGGTTCCCAGGCTAGGGGTTGAATCGGAGCTGTAGCCACCGGCCTACGCCAGAGCCACAGCAACGCGGAATCCGAGCCGCGTCTGCAACCTACACCACAGCTCACGGCAACGCCGGATCGTTAACCCACTGAGCAAGGGCAGGGATCGAACCCGCAACCTCATGGTTCCTAGTCGGATTCGTTAACCACTGCGCCACGACGGGAACTC	T	ENSSSCG00000009714	intron_variant,feature_truncation	MODIFIER	NEK1	protein_coding	INTRON=4/30,STRAND=1	ESE,SXL binding site,C-to-U RNA editing sites
sv_23976	14	22067332	22067646	314	DEL	AATATATCACAACAGGAGTTCCCGTCGTGGCACAGTGGTTAACGAATCCAACTAGGAACCATGAGGTTGCGGGTTCGGTCCCTGCCCTTGCTCAGTGGGTTAACGATCCAGCGTTGCCGTGAGCTGTGGTGTAGGTTGCAGACGCGGCTCGGATCCCGCGTTGCTGTGGCTCTGGCGTAGGCCGGTGGCTGCAGCTCCGATTCAACCCCTAGCCTGGGAACCTCCATATGCCGCGGGAGCGGCCCAAGAAATAGCAACAACAACAACAACAACAACAAAAACAAAAGACAAAAGACAAAAAAAATATATATATAT	A	ENSSSCG00000009722	intron_variant,feature_truncation	MODIFIER	SPOCK3	protein_coding	INTRON=5/9,STRAND=1	acceptor,ESE,ESS,Polyadenylation Signal (PAS)
sv_24007	14	23227059	23227146	87	DEL	CCCAGCCACCTGCTGCATTCCCTGCTCCTCCCCCATCACAGGAAGCCACTGCCCCTGACCTCTGCCCCCACCCCACCTTCTCCCCAGT	C	ENSSSCG00000009738	intron_variant,feature_truncation	MODIFIER	GALNT9	protein_coding	INTRON=10/10,STRAND=1	ESE
sv_24025	14	24202508	24202508	104	INS	C	CTCACTGGTACCCACACGCCTCCCCTCCAGCATCTTTTCTTTCTCTCAATCGTTCACTGGTACCCACACGCCTCCCCTCCAGCATCTTTTCTTTCTCTCAATCGT	ENSSSCG00000009745	intron_variant,feature_elongation	MODIFIER	ADGRD1	protein_coding	INTRON=6/25,STRAND=-1	ESE
sv_24169	14	35166180	35166325	145	DUP:TANDEM	AGTGGTCTGCCTCTAGGTAGTGTGTCCACCCTGTTTGTCCCATTAACCTAGGCATAGGGTGGTGTCTGGTGGATGGCACATACCTAGCAGGTGTTTCATCACCATCTTAGTTGAGTTTGAGTTCCCCAGAAGCAGGACCTGAGGCT	AGTGGTCTGCCTCTAGGTAGTGTGTCCACCCTGTTTGTCCCATTAACCTAGGCATAGGGTGGTGTCTGGTGGATGGCACATACCTAGCAGGTGTTTCATCACCATCTTAGTTGAGTTTGAGTTCCCCAGAAGCAGGACCTGAGGCTGTGGTCTGCCTCTAGGTAGTGTGTCCACCCTGTTTGTCCCATTAACCTAGGCATAGGGTGGTGTCTGGTGGATGGCACATACCTAGCAGGTGTTTCATCACCATCTTAGTTGAGTTTGAGTTCCCCAGAAGCAGGACCTGAGGCT	ENSSSCG00000009856	intron_variant	MODIFIER	NOS1	protein_coding	INTRON=1/29,STRAND=1	acceptor,ESE,Musashi binding element (MBE)
sv_24212	14	42243415	42243628	213	DEL	CTTGTTTTTCCTTTCTTGTTTTTTGATCTTGCCTGCGGCATGCAGGGGTTCCTGGGTTAGGGATTGAACCCGTGCCACAGCTCTGGACCCAAGCCACAGCAGTAACAATGCCAGATCCTTTAACCACCAGACCACCGGAGAACTCCTAGGTCTTATCTTTCTGTAGAGTTTTATAAATTTATCCAATGTCTTAAACACATTTTTAGATATATTT	C	ENSSSCG00000009946	intron_variant,feature_truncation	MODIFIER	SART3	protein_coding	INTRON=5/17,STRAND=1	ESE
sv_24249	14	48188258	48188524	266	DEL	ACGGCATATGGAGGTTCCCAGGCTAGGGGTTGAATTGGAGCTGCAGCGCTGGCCTATGCCACAGCCACAGCTGCATATGCCACACCAGATCCAAAGTGCATCTTCAAGTTACACCACAGCTCACAGGAATACCAGATCCTTAACCCACGGAGCAACAAGGCCAGGGACAGAACCTGCATCCTTATGGAGAGTCAGATTTACTTCCCCTGAGTCACAACAGGAACTCCAGATTTTTTTTTTTTTTGGTCTTTTCTAGGGCTGCACCTG	A	ENSSSCG00000010030	intron_variant,feature_truncation	MODIFIER	EIF4ENIF1	protein_coding	INTRON=2/17,STRAND=-1	ESE,ESS,SXL binding site,ssc-miR-4331
sv_24350	14	61949298	61949393	95	DEL	ACAGTTATTCAGGATTATCATCATAAAGAATAATTTTCAAAATATGGCTTATGTTCTGCATATAGACCTCTGAGTCTATGCTAAATGTAATAGTTT	A	ENSSSCG00000010204	intron_variant,feature_truncation	MODIFIER	BICC1	protein_coding	INTRON=2/20,STRAND=1	ESE,Musashi binding element (MBE)
sv_24446	14	73044596	73044596	86	INS	G	GATTAAAAAAATCAAGACACTGAATTTAACCAACACAACATGGGTACCGAATCTAGAGATCAGAGCACTGGAGCCTCATTTTTTTAA	ENSSSCG00000031713	intron_variant,feature_elongation	MODIFIER	MACROH2A2	protein_coding	INTRON=6/8,STRAND=1	ESE
sv_24461	14	74500549	74500627	78	DEL	CCCATTTTATGGATGGGTAGCCTGAGGCCAAGAGAGTCAAGAAGCCCAAGGTCATAGGGTTGGTGAATTGGCTCCTGGT	C	ENSSSCG00000010278	intron_variant,feature_truncation	MODIFIER	CDH23	protein_coding	INTRON=17/77,STRAND=1	ESE,C-to-U RNA editing sites
sv_24485	14	76460026	76460142	116	DUP:TANDEM	CGCAGCAAATGGAGTTCCCAGGCTAGGGGTTGAATCGGAGCTGTAGCCATCTGCCTATACCACGGTCACAGCAACGCGGGATCTGAGCCAAGTCTGTGACCTACCCCACAGCTCACG	CGCAGCAAATGGAGTTCCCAGGCTAGGGGTTGAATCGGAGCTGTAGCCATCTGCCTATACCACGGTCACAGCAACGCGGGATCTGAGCCAAGTCTGTGACCTACCCCACAGCTCACGGCAGCAAATGGAGTTCCCAGGCTAGGGGTTGAATCGGAGCTGTAGCCATCTGCCTATACCACGGTCACAGCAACGCGGGATCTGAGCCAAGTCTGTGACCTACCCCACAGCTCACG	ENSSSCG00000010303	intron_variant	MODIFIER	SYNPO2L	protein_coding	INTRON=3/3,STRAND=-1	ESE
sv_24620	14	90943394	90943394	50	INS	T	TTATTTTCAGAAGAAGAAATGACCAGCTAAGGCCCAACAGAGATTTCAAGG	ENSSSCG00000038734	intron_variant,feature_elongation	MODIFIER	-	protein_coding	INTRON=2/3,STRAND=1	ESE,ncRNA hybridization regions
sv_24730	14	99437929	99438055	126	DUP:TANDEM	GGATAACTTCAAATGGAACCCCGTCATTGTCACCAAGGATATCGTTAAGTCCAGGTGTTAAAGAGAAGTCAGTTATCTGTCAAAAGTTTAATAAGTTGGAGACAAACTACCACGTACAGTGTCTTAT	GGATAACTTCAAATGGAACCCCGTCATTGTCACCAAGGATATCGTTAAGTCCAGGTGTTAAAGAGAAGTCAGTTATCTGTCAAAAGTTTAATAAGTTGGAGACAAACTACCACGTACAGTGTCTTATGATAACTTCAAATGGAACCCCGTCATTGTCACCAAGGATATCGTTAAGTCCAGGTGTTAAAGAGAAGTCAGTTATCTGTCAAAAGTTTAATAAGTTGGAGACAAACTACCACGTACAGTGTCTTAT	ENSSSCG00000010433	intron_variant	MODIFIER	SGMS1	protein_coding	INTRON=2/10,STRAND=-1	ESE
sv_24755	14	101333669	101333788	119	DEL	CCCAGGAACTTCTTTTTTTTTTTTTTTTAATATATATATATATTTTTTATTTTCCCACTGTACAGCAAGGGGGTCAGGTTATCCTTACATGTATACATTACAATTACAGTTTTTCCCTCA	C	ENSSSCG00000010455	intron_variant,feature_truncation	MODIFIER	SLC16A12	protein_coding	INTRON=2/7,STRAND=-1	ESE,SXL binding site,C-to-U RNA editing sites
sv_24838	14	108797632	108798035	403	DEL	GCCTTGCTCAGTGGGTCAAGGATCCAGTATTGCCGTGAGCTGTGGTGCAGGTTGCAGATGCGGCTCGGATCCTGTGGTGCTGTGGCGTAGGCCAGCAGCTGTAACTCCAATTTGACCCTAGCCTGGGAACCTCCCTATGCCTCAGGTGTGGCCCTAAAAAGCAAAAAAAAAATAAAAATAAAAATAAATAATAATCCTATTATGTATATAATGAATGCTTTAAAATATATATGCAAAGAAACACTATGAGAGAATATATAAAGATGAATAGAATTATGCTAGGATAGCAGAAATGCAGGGAATCAGTTTTAAGAATCTTTAAAGTAGTCATGGGGAGTTCCTGTCATGGCTCAGTGGTTAATGAATCCAACTAGGAACCATGAGGTTGCAGGTTCAATC…	G	ENSSSCG00000010514	intron_variant,feature_truncation	MODIFIER	RRP12	protein_coding	INTRON=8/33,STRAND=-1	ESE,ESS,Musashi binding element (MBE),C-to-U RNA editing sites,Polyadenylation_site
sv_24848	14	110408764	110408860	96	DUP:TANDEM	CTCTGGGCAACTGCAAGTCTGTTCTCTAAGTCTATGATTTTCTTTTCTGTGGAAAGGTTCATTTCTGCCATATATTAGATTCCAGATATAAGTGAAA	CTCTGGGCAACTGCAAGTCTGTTCTCTAAGTCTATGATTTTCTTTTCTGTGGAAAGGTTCATTTCTGCCATATATTAGATTCCAGATATAAGTGAAATCTGGGCAACTGCAAGTCTGTTCTCTAAGTCTATGATTTTCTTTTCTGTGGAAAGGTTCATTTCTGCCATATATTAGATTCCAGATATAAGTGAAA	ENSSSCG00000010535	intron_variant	MODIFIER	HPSE2	protein_coding	INTRON=2/11,STRAND=-1	ESE,Terminal Oligopyrimidine Tract (TOP)
sv_24850	14	110439558	110439614	56	DEL	CACAATGGGAACTCCTCTCCATCATTTTAAAAGCACAGGATATGGAAGAAATAAGAG	C	ENSSSCG00000010535	intron_variant,feature_truncation	MODIFIER	HPSE2	protein_coding	INTRON=2/11,STRAND=-1	ESE,Polyadenylation Signal (PAS)
sv_24859	14	111221834	111221890	56	DEL	GGGTTCGATCCCTGCCCTTGCTCAGTGGGTTAACGATCCGGCGTTGCCATGAGCTGT	G	ENSSSCG00000010545	intron_variant,feature_truncation	MODIFIER	CPN1	protein_coding	INTRON=1/9,STRAND=-1	ESE
sv_24897	14	113709325	113709526	201	DEL	ACCTGCAGCATATGGAGGTTCCCAGGCTAAGGGTCAAATTGGAGCTGTAGCTGCTGGCCTACACCACAGCCACAGCAATGAGGGATCCGAGCCACGTTTGTGACCTACGCCACAGCTCACAGCAACACCAGATTCTTTTTTTTTTTTTTTTTTTTTTGTCTTTTTGTCTTTTGTTGTTGTTGTTGCTATTTCTTAGGCCGCT	A	ENSSSCG00000010589	intron_variant,feature_truncation	MODIFIER	SFXN2	protein_coding	INTRON=1/11,STRAND=1	ESE,SXL binding site,C-to-U RNA editing sites,ssc-miR-4331
sv_24906	14	114355458	114355538	80	DEL	CACACTAAAGGAGGTTTAGGTATGGATCTCTTTATTATATTTGGGTAAATCTAGATTTCTGTTTATCAGGTGGCATAAATT	C	ENSSSCG00000010599	intron_variant,feature_truncation	MODIFIER	PDCD11	protein_coding	INTRON=18/39,STRAND=1	ESS,Polyadenylation Signal (PAS),C-to-U RNA editing sites
sv_24925	14	115794719	115795323	604	DEL	ATCTGTAGGGGGGAGTGGTCTATAGGATGGGGGAGTGGTCTGTAAGATGGGGGAGTGGTCTAGAGGATGGGGAGTGGTCTCTAAGATGGGGGAGTGGTCTAGAGGATTGGGAGTGGTGTATAGAATGGGGGAGTGGTCTATAAGATGTGGGAGTGGTCTGTAGGGGGGAGAGTGTTCTAGAGGATTGGGAGTGGTCTATAAGATGGGGGAGTGGTCTGTAGGGGGGAGAGTGGTCTAGAGGATTGGGAGTGGTCTATAAGATGTGGGAGTGGTCTGTAGGGGGGAGAGTGTTCTAGAGGATTGGGAGTGGTCTATAAGATGTGGGAGTGGTCTGTAGGGGGGAGAGTGTTCTAGAGGATTGGGAGTGGTCTATAAGATGGGGGAGTGGTCTGTAGAGGG…	A	ENSSSCG00000010617	intron_variant,feature_truncation	MODIFIER	SORCS3	protein_coding	INTRON=2/28,STRAND=1	Polyadenylation sites,ncRNA hybridization regions
sv_25121	14	129776776	129776857	81	DEL	TTTTCCATATTTAAAAAAAAAAAAAGTGACAGCAACTGTGGTGTCTTACATCCCAGGATTTGTTTTGCAAACCTAGTTAAAA	T	ENSSSCG00000010690	intron_variant,feature_truncation	MODIFIER	SEC23IP	protein_coding	INTRON=6/20,STRAND=1	ESE,C-to-U RNA editing sites
sv_25207	14	133927350	133927350	56	INS	G	GTGAGCAGCAGAGAAAGTATCCACTTGTTACAGAGGCGTCGGTTATATCTTTGCCCC	ENSSSCG00000010735	intron_variant,feature_elongation	MODIFIER	LHPP	protein_coding	INTRON=5/5,STRAND=1	ESE
sv_25217	14	134421991	134422184	193	DEL	CCGGCACCCAGGGACTCCTGGACCCAAGCTGGCCACGCTCTTTCCTGCCTCGGTCTCCCTGTTCCCGCCTTTTCCTCAGCAACTGGAACAACCTACATATAAGTCAGAACCATCATCTTAGCTGCTGCTTTCTTGGCAAGCATGTGACATCGCTAGGAGTCAGTTAGAAACACCCTGTGTCCTGTGATCGGAGG	C	ENSSSCG00000010739	intron_variant,feature_truncation	MODIFIER	CTBP2	protein_coding	INTRON=3/11,STRAND=-1	ESE,K-Box (KB),C-to-U RNA editing sites
sv_25263	14	136674086	136674379	293	DEL	GGAGCTGGCGCGTTGTCACTCCCGTCCTCACTGTCAGCAAAAGCTGGCAAACTGCAAGTCAACAGCTCTTCTTAGGTTCACCGTCTAAGATCCACGGGGGAAACTGCCACCCCACGCATTGGAGAGACAGGAGGAGAGAGAGAAGCAGAGCTTCCCGGAGCAGAAATCCAGGAGCAGGCATAGCCGCAGCAGCAAGGGCTGGATTCCTTTCCCCAGTACCTCGTGTTCGATTTCAGCATCAACTCACGAGGTGTCCTAAAGGCAAAAGGCGCAATTTGGAGAGCTAGAACCTCA	G	ENSSSCG00000035045	intron_variant,feature_truncation	MODIFIER	DOCK1	protein_coding	INTRON=34/50,STRAND=1	ESE,ESS
sv_25690	15	4040736	4040736	75	INS	A	ACTCCTCCTGGATCATTTTTTGAAGTTAGCTGAAACTTGCTATCTATAGAAGACATGTTTACAACTAAGCACAGAG	ENSSSCG00000015667	intron_variant,feature_elongation	MODIFIER	MBD5	protein_coding	INTRON=1/15,STRAND=-1	ESE
sv_26107	15	31627753	31628053	300	DEL	TCCAAGAACATTTTTTTTAATTTATTTTATTTTATTTTATTTTATTTTTTTGTCTTTTTGCTATTTCATTGGGCCGCTCCCGCAGCATATGGAGGTTCCCAGGCTACGGGTCTAATCGGAGCTGTAGCCGCCAGCCTACGCCAGAGCCATAGCAACATGGGATCCGAGCCGCATCTGCGACCTACACCACAGCTCACGGCAACGCCGGATCGTTAACCCATTGAGCAAGGGCAGGGATCGAACCTGCAACCTCATGGTTCCTAGTCGGATTCGTTAACCACCGCGCCACGACGGGAACTCC	T	ENSSSCG00000015741	intron_variant,feature_truncation	MODIFIER	CFAP221	protein_coding	INTRON=14/23,STRAND=-1	ESE,ESS,C-to-U RNA editing sites
sv_26124	15	32994959	32995055	96	DEL	ACCCTTTGCAGCAAGGAGAACCTTTTCGGCAGGGAGAACCTCTACAGCAAGAATAATGCCCTTTACAGCAGGGAGAACCTTTGCAGCAAAGAGAACG	A	ENSSSCG00000015746	intron_variant,feature_truncation	MODIFIER	DLGAP2	protein_coding	INTRON=3/14,STRAND=1	ESE
sv_26379	15	61602757	61603057	300	DEL	TTAGATCCACGAAGGTGGAGTTCCCGTCGTGGCGCAGTGGTTAACGAATCCGACTAGGAACCATGAGGTTGCGGGTTCGATCCCTGCCCTTGCTCAGTGGGTTAACGATCCGGCGTTGCCGTGAGCTGTGGTGTAGGTTGCAGACGCGGCTCGGATCCCGCGTTGCTGTGGCTCTGGCGTAGGCCGGTGGCTACAGCTCCGATTCAACCCCTAGCCTGGGAACCTCCATATGCGCGGGAGCGGCCCAAGAAATAGCAACAATAACAACAACAACAAAAAAGACAAAAAAAATAAATAAAAA	T	ENSSSCG00000022671	intron_variant,feature_truncation	MODIFIER	GALNT13	protein_coding	INTRON=3/12,STRAND=1	acceptor,ESE,ESE,Polyadenylation Signal (PAS),C-to-U RNA editing sites,functional RNA sequences
sv_26647	15	94873466	94874248	782	DEL	CCTCTGATTAGACCCCTAACCTGGGAACCTCCATGTGCCATGGGTACAGCCCCAGAAAAGACAAAAAAAAAAAAATAGGTACAGCTGGAATGCACCTCAACATAATAAAGTCCAAAGATGGTAAGCCCACAGCTAACACCATACTCACAGTGAAAAGCTGAACAGGAACATGATGAGGATGTCCACTCTCACCAAAGAAAGTCCTACCCAGAGCAATTAGGTGAGAAAAGAAATGAAAGGACCCAAATCAGAAAGTAAGTAAAACTATCACTTAGGATGCCATGATATTATGTATAGGAAACCCTAAAGATGCCACCAAAAACTGTTAGAACTAGCAAATTTGGTAGTTTCAGGATACAAAATCAATACACAAAAATCAGTTATGCTTCTGTACACAAA…	C	ENSSSCG00000016049	intron_variant,feature_truncation	MODIFIER	HIBCH	protein_coding	INTRON=6/12,STRAND=-1	donor,ESE,Terminal Oligopyrimidine Tract (TOP),Brd-Box (Brd),Musashi binding element (MBE),Polyadenylation_site
sv_26703	15	101491362	101491463	101	DEL	GGGAGAAGGAACAAATGGTGTTGTTGACAGCATTAACATGCAGGCCTGGTTGTTGTTCAGTTGATGCTATGTGATTTGCAAAAGCTTTATTATACCTTACAA	G	ENSSSCG00000037483	intron_variant,feature_truncation	MODIFIER	RFTN2	protein_coding	INTRON=1/9,STRAND=-1	ESE,UNR binding site,Brd-Box (Brd)
sv_26735	15	104496238	104496575	337	DEL	TAAAATAAATTCAAAAAAAAAAAATGCTTTGGGAGTTCCCGTCGTGGCGCAGTGGTTAACGAATCCGACTAGGAACCATGAGGTTGCAGGTTCGGTCCCTGCCCTTGCTCAGTGGGTTAACGATCCGGCGTTGCCGTGAGCTGTGGTGTAGGTTGCAGACGCGGCTCGGATCCCGCGTTGCTGTGGCTCTGGCGTAGGCCGGTGGCTACAGCTCCAATTCAACCCCTAGCCTGGAAACCTCCATATGCCGAGGGAGCGGCCCAAGAAATAGCAACAACAACAACAACAACAACAAAAAGACAAAAGACAAAAAATAAAATAAAATCAAATAAAATAAA	T	ENSSSCG00000016093	intron_variant,feature_truncation	MODIFIER	AOX2	protein_coding	INTRON=36/36,STRAND=1	acceptor,ESE,ESS,Polyadenylation Signal (PAS),C-to-U RNA editing sites,ncRNA hybridization regions
sv_26743	15	104924577	104924577	56	INS	C	CGCAAACTGTATCATTGTTTTGTGTGTGTACACTACTTTTGGAAGGCAGCTATGCTT	ENSSSCG00000028157	intron_variant,feature_elongation	MODIFIER	CASP8	protein_coding	INTRON=1/10,STRAND=1	-
sv_26774	15	106920923	106921026	103	DEL	AACTTAAAAGTTTGGATAAAGAAAAAAATAATCACTAAAAACAGCTTAGACTAGTCATAATACATGCATGAGCTCTCAGGGCTATGGTTCAGGAGAGAAGAGAG	A	ENSSSCG00000016119	intron_variant,feature_truncation	MODIFIER	-	protein_coding	INTRON=10/13,STRAND=-1	ESE,C-to-U RNA editing sites
sv_26832	15	111404669	111404999	330	DEL	TCCCGCGGCATATGGAGGTTCCCAGGCTAGGGGTCGAATTGGAGCTGTAGCCACCGGCCTACACCAGAGCCACAGTAGTGCGGGATCCGAGCTGTGTCTGCAACCTACACCATAGCTCACGGCAACGCTGGATCGTTAACCCACTGAGCAAGCGCAGGGACAGAACCCGAAACCTCATGGTTCCTAGTCAGATTTGTTAACCACTGTGCCACGATGGGAACTCCTGCAAGATTATTTCTGCACATAGACTGTGATGCTTTGTATTTATCAAGTAAAAAAATACCACCCTATTTTTTTTTTTTTTCCTGTCTTTTGTCATTTTAGGGCCACA	T	ENSSSCG00000016147	intron_variant,feature_truncation	MODIFIER	PIKFYVE	protein_coding	INTRON=7/40,STRAND=1	ESE,ESS,SXL binding site,K-Box (KB),Musashi binding element (MBE),C-to-U RNA editing sites,cis-regulatory elements of ERPIN
sv_26916	15	118565162	118565270	108	DUP:TANDEM	TCAACAGATGAGAAGAACCAAGGGTCTTTTCTTCGGGGTGGCAGGAACCCACCAGGTCACTGTCTGGTACAAGAGAGGGCGGTCAGTTGACCTGAGGATTTCTGGTCTC	TCAACAGATGAGAAGAACCAAGGGTCTTTTCTTCGGGGTGGCAGGAACCCACCAGGTCACTGTCTGGTACAAGAGAGGGCGGTCAGTTGACCTGAGGATTTCTGGTCTCCAACAGATGAGAAGAACCAAGGGTCTTTTCTTCGGGGTGGCAGGAACCCACCAGGTCACTGTCTGGTACAAGAGAGGGCGGTCAGTTGACCTGAGGATTTCTGGTCTC	ENSSSCG00000016176	intron_variant	MODIFIER	MARCHF4	protein_coding	INTRON=1/3,STRAND=-1	acceptor,ESE
sv_27037	15	125630904	125630991	87	DEL	GGAGGCAAGGAAGGCCCCAGGAGAGAAGGAACCCCAGTGAAGTCTCAGCCCCCTGGGAGAATCTCTAGAGTAACAGCAAATTAAAATT	G	ENSSSCG00000040847	intron_variant,feature_truncation	MODIFIER	AP1S3	protein_coding	INTRON=1/4,STRAND=-1	ESE,Polyadenylation Signal (PAS)
sv_27206	15	133195200	133195200	92	INS	G	GTTCAGGTTCAAAAGACTATTAGCTTTCTATGATGTTTGTAATTGGGGTTGTAAAAGTATTTCAGACAGATGAGGCAAACACTTTTATGGGAA	ENSSSCG00000016291	intron_variant,feature_elongation	MODIFIER	GIGYF2	protein_coding	INTRON=2/26,STRAND=1	-
sv_27208	15	133594044	133594148	104	DEL	AGTCTGTCAGTCTGTGTGTGAGTCTGTGTGTGAGTCAGTCTGTATGTGAACCTGTGTGTGTGTGTGAGTCTGTCAGTCTGGGTGTGAGCCTGTGTGTGTGTGTGT	A	ENSSSCG00000016298	intron_variant,feature_truncation	MODIFIER	INPP5D	protein_coding	INTRON=13/26,STRAND=1	-
sv_27216	15	134115973	134116307	334	DEL	TCCTATTACATTCTTTTTTTTTTTTTTTTTTTTTTTTTTTTGTCTTTTGTCTTTTTGTCTGTTGTTGTTGTTGATGTTGTTGTTGCTGTTGTTGCTATTTCTTGGGCCGCTCCCGCGGCATATGGAGGTTCCCAGGCTAGGGGTTGAATCAGAGCTGTAGCCACCGGCCTACGCCAGAGCCACAGCAACGAGGGATCCGAGCTGCGTCTGCAACCTACACCACAGCTCACGGCAACGCCGGATCGTTAACCCACTGAGCAAGGGCAGGGACCGAACCTGCAACCTCATGGTTCCTAGTCGGATTCGTTAACCACTGCGCCAACACGGGAACTCCC	T	ENSSSCG00000016313	intron_variant,feature_truncation	MODIFIER	HJURP	protein_coding	INTRON=4/8,STRAND=-1	ESE,SXL binding site,C-to-U RNA editing sites,ncRNA hybridization regions
sv_27243	15	135510304	135510383	79	DEL	CCTGATGAAGGAGAACATGAGAGAGACTGTGTAGACGCATGACCGGGTCACGTTGCTGCACCGCAGAAGTTGGCGGAACA	C	ENSSSCG00000016317	intron_variant,feature_truncation	MODIFIER	AGAP1	protein_coding	INTRON=2/21,STRAND=1	ESE
sv_27823	16	8396515	8396600	85	DEL	GCTCAGGGCAATGCCGGATCGTTAACCCACTGAGCAAGGGCAGGGATCAAACCCGCAGCCTGATGGTTCCTAGTCAGATTCGTTAA	G	ENSSSCG00000026842	intron_variant,feature_truncation	MODIFIER	CDH18	protein_coding	INTRON=2/11,STRAND=-1	ESE,C-to-U RNA editing sites
sv_27982	16	18495770	18495770	96	INS	C	CCTTGGGTAGTATAGTCATTTTGATAATATTGACTCTTCAACCCATACCATCAAGAGCATGGTATGTCTTTCCATCTGTTTGTGTCATCTTTGATTT	ENSSSCG00000031509	intron_variant,feature_elongation	MODIFIER	MTMR12	protein_coding	INTRON=7/17,STRAND=-1	ESS,Terminal Oligopyrimidine Tract (TOP),Musashi binding element (MBE),
sv_28067	16	22808536	22808536	88	INS	G	GGAAGTTATTAGGTCTTGTGCCAGTGCTGCTTCAAAACTAGCTGCATAAAGTAAATCACTCATGCCTCAGCCTCTTTTTTTGGTAAAAT	ENSSSCG00000016846	intron_variant,feature_elongation	MODIFIER	WDR70	protein_coding	INTRON=10/18,STRAND=1	ESE,C-to-U RNA editing sites
sv_28101	16	24737171	24737316	145	DUP:TANDEM	GGAATATGGCACCATATTACACCAATTAGTCCTCCTCCCCAAACTGTGACTTTTAGAAATGTGTCATTTTCAGACATACAGCTGATTGCATTGAGTGTGAGTTAGAGACTCTAGAAAAAGACCCCAAGAAAAGTGTCTAGTCAAGA	GGAATATGGCACCATATTACACCAATTAGTCCTCCTCCCCAAACTGTGACTTTTAGAAATGTGTCATTTTCAGACATACAGCTGATTGCATTGAGTGTGAGTTAGAGACTCTAGAAAAAGACCCCAAGAAAAGTGTCTAGTCAAGAAAGAGAATATGGCACCATATTACACCAATTAGTCCTCCTCCCCAAACTGTGACTTTTAGAAATGTGTCATTTTCAGACATACAGCTGATTGCATTGAGTGTGAGTTAGAGACTCTAGAAAAAGACCCCAAGAAAAGTGTCTAGTCAAGA	ENSSSCG00000016857	intron_variant	MODIFIER	DAB2	protein_coding	INTRON=1/13,STRAND=-1	ESE,Musashi binding element (MBE),functional RNA sequences
sv_28139	16	28242760	28242907	147	DEL	CCTAATGGAGATTATTAAAGATGATTATGGGAGTTCCCATTGTGGCTCAGCCAATTAGAAAGCCTGACTAGCATCCATGAGGATGTGGGTTCGATCCTAGGCTGGCAGCTGCAATGCAACTCTGATTCAGCTCCTAGCCTGGGAACCT	C	ENSSSCG00000016877	intron_variant,feature_truncation	MODIFIER	NNT	protein_coding	INTRON=19/23,STRAND=1	C-to-U RNA editing sites
sv_28212	16	34471906	34472022	116	DEL	TGTCATGGCTCAGTGGTTAACGAATCCGACTAGGAACCATGAAGTTGTGGGTTCGGTCCCTCCCTTGCTCAGTGGGTTAAGGATCTGGCGTTGCCGTGAGCTGTGGTGTAGGTCGCA	T	ENSSSCG00000016907	intron_variant,feature_truncation	MODIFIER	DHX29	protein_coding	INTRON=1/25,STRAND=-1	C-to-U RNA editing sites
sv_28764	16	79139223	79139453	230	DEL	GCTGGTCACCCCCATGCATCCCCACTGTGCTCACCTGACTGGGGGCAGACTACCCCAGGCTCCTCTCCACGGACCACCACGGGGCCCAGTGCCAGGCTCGGCCTGCCCCGCAGAGGGACTAACGTGCCTGGCCCGGGGCTGTCTGTGGGGGGCAGGGCCCAGATGTTCTGAGGGCTGCCTGCAGCTGGAAGGGTTCTCCTGCCCTGGGACCCCCGGGACAGGCCAGGGCCC	G	ENSSSCG00000017116	intron_variant,feature_truncation	MODIFIER	LPCAT1	protein_coding	INTRON=1/13,STRAND=1	ESE
sv_28769	17	172677	172677	120	INS	T	TCAGAGCAAGTAGCAGAAAGTAGCTTCCTGGATGAGCCTGGGTATCCACTGAGCACCCTGCTCCAGGGCTGGCCCGGGGTCAGCAGGAGGAAGACTCCTAAAGACCAATCTCCCCTCCCAC	ENSSSCG00000007001	intron_variant,feature_elongation	MODIFIER	-	protein_coding	INTRON=2/17,STRAND=-1	ESE,C-to-U RNA editing sites
sv_28818	17	2462604	2462671	67	DEL	TAACTGAAAGTATCAGTAACCAATGTGATCCCTGACATATATATATATATATATACACACACACACAC	T	ENSSSCG00000038257	intron_variant,feature_truncation	MODIFIER	SGCZ	protein_coding	INTRON=1/7,STRAND=-1	ESE
sv_28880	17	5336763	5336763	52	INS	T	TTGGACTTTTGCTATGATGGGACTATGTTGGCCTGGCATACTTCAAGGGCAGC	ENSSSCG00000040013	intron_variant,feature_elongation	MODIFIER	MTUS1	protein_coding	INTRON=9/11,STRAND=-1	-
sv_28977	17	9930312	9930613	301	DEL	ATATACACATCTGTTTTTTGTTGTTGTTGTTGTTGTTGTTGTTGTTGTTGTTGTTGTTGTTGCTATTTCTTGGGCCGCTCCCGCGGCATATGGCGGTTCCCAGGCTAGGGGTCCAATCAGAGCTGTAGCCACCGGCCTACGCCAGAGCCACAGCAACTCGGGATCCGAGCCGCGTCTGCAACCTACACCACAGCTCACAGCAACGCCGGATTGTTAACCCACTGAGCAAGGGCAGGGACTGAACCCGCAACCTCATGGTTCCTAGTTGGATTCGTTAACCACTGCGCCACGACGGGAACTCC	A	ENSSSCG00000007010	intron_variant,feature_truncation	MODIFIER	ZMAT4	protein_coding	INTRON=5/6,STRAND=-1	ESE
sv_28994	17	11187864	11187864	51	INS	A	AGCTGCAGCTGCCGGCCTACACCATAGCCACAGCAATGCCAGATCTGAGCTT	ENSSSCG00000007033	intron_variant,feature_elongation	MODIFIER	AP3M2	protein_coding	INTRON=8/9,STRAND=1	ESE,ssc-miR-4331
sv_29011	17	11951316	11951767	451	DEL	AGAACCTCCATATGCGGCAGGTGTGGCCCTAAAAAGCAAAAAAAAAAAAAAATTAAAAAAAAAAAAGAAAAGCCGTTGAGGAAGAAAATGTTGCTACACTGTGCACAATTCGGCAGCACACATACTAAAATTGGAACGATATAGAGAAGATTAGCATGGCCCCTGTGCAAGGATGACGCACAAATTCGTGAAGCATTCCATGTTTTTAAAAAAAGAAAAAAGAAAATGTTGCTATAAAACTGAAGAAACAGAGTTCCTGTCATGGCTCAGCGGTTAACGAATCTCACTAACATCCATTAGGATGCAGGTTCAGTCCCAGGCCTTGCTCAGTGGGTTAAGGATCTGGTGTTGCTGTGAGCTGTGGTGTAGGTTGCAGATGTGGCTCAGATCCTGTGTTGC…	A	ENSSSCG00000031510	intron_variant,feature_truncation	MODIFIER	FNTA	protein_coding	INTRON=9/14,STRAND=1	ESE,C-to-U RNA editing sites,long stems,functional RNA sequences
sv_29078	17	14924868	14924942	74	DEL	GGTTTTATTCACAAAATCTCCTTCAATGTTACATACAGAGAAAAATGATGGAAAATACTATAAAAATTCTTGTAC	G	ENSSSCG00000007046	intron_variant,feature_truncation	MODIFIER	TRMT6	protein_coding	INTRON=4/14,STRAND=-1	ESE,Polyadenylation Signal (PAS)
sv_29230	17	24933164	24933258	94	DEL	AAAATTTAAAAGTTAAAAAACAATAAAAGTAAGTAACTCTGCCTCATCTGTAGAGAAAGGAAGAGGACACTTAACAGGGCTTTGTTTCTGAGCAC	A	ENSSSCG00000007080	intron_variant,feature_truncation	MODIFIER	-	protein_coding	INTRON=25/26,STRAND=-1	ESE,C-to-U RNA editing sites,functional RNA sequences
sv_29246	17	26132758	26133065	307	DEL	TTTGTTTTTTTTTTGTTTTTTTTTTTTTGTCTTTTGTCTTTTTTGTTGTTGTTGCTATTTCTTGGGCCGCTCCCGCGGCATATGGAGGTTCCCAGGCTAGGGGTCCAATCGGAGTTGTAGCCACCGGCCTACGCCAGAGCCACAGCAACACGGGATCCGAGCCACGTCTGCAACCTACACCACAGCTCACGGCAACGCCGGATCGTTAACCCACTGAGCAAGGGCAGGGACCGAACCCGCAACCTCATGGTTCCTAGTCGGATTTGTTAACCACTGCGCCACGACGGGAACTCCCTGATAGTGTTTGC	T	ENSSSCG00000007087	intron_variant,feature_truncation	MODIFIER	BANF2	protein_coding	INTRON=1/2,STRAND=1	ESE,SXL binding site,Musashi binding element (MBE),RNA C-to-U editing site
sv_29339	17	33589801	33589886	85	DEL	CGGAACCTTTGGGAAACTGATCCAAATGTTCCCTATTCAATGGTGTGGGGTAATAAGCTTTTATTCAGCACCCACTATGCACCAGG	C	ENSSSCG00000028461	intron_variant,feature_truncation	MODIFIER	-	protein_coding	INTRON=3/8,STRAND=-1	ESE
sv_29610	17	50784987	50785186	199	DEL	AAATAAATAATAAAGTTATTCAGAAGGTATCTCAGAAGTGGCCTGGGAACTTCCATATGCCTTGGGTGTGGCAAAAATAAATAAATAAATAAATAAATAAATAAATAATAAAGTTATTCAGAAGGTATCTCAGAAGTGGCCTGGGAACTTCCATATGCCTTGGGTGTGGCAAAAATAAATAAATAAATAAATAAATAAAT	A	ENSSSCG00000025534	intron_variant,feature_truncation	MODIFIER	CSE1L	protein_coding	INTRON=14/24,STRAND=1	ESS,Polyadenylation Signal (PAS),Polyadenylation_site
sv_29632	17	52827801	52828714	913	DUP:TANDEM	TTGGAGGATGACACAAGCCACACCATGGAGGTGACGTGACAGAATTGGAGAAGCAAAGAACGAGTGGGAAAGACTCAGGATGGGAAAAACAACCCGAAACGACCTCGTGCACAGTGGAAGCCAGGCACTCACTCCGACTCCTCCGTGGGCAGTTAAACAGCCCCTGACATGGGGGCCCGGGGGTGGGGGGGCAGGGAGAAGCCTCTTTGCATGGAAAGCACACTTCCCCCACCCCCAGCTCCACCCTCCCCTTCCCCAGAAGGTGGGAGAAGGTGCCCAGAGCATGTTCATTCTGGAGGAGCCTTGCCAGCCCTCTGGAGGTTTGCTAAGAGCACAGGGCTATTTACCTGTGTCTAAAAACTGAGTGATTTGGGTCCTGCAAACAGAACTTAATGTCGT…	TTGGAGGATGACACAAGCCACACCATGGAGGTGACGTGACAGAATTGGAGAAGCAAAGAACGAGTGGGAAAGACTCAGGATGGGAAAAACAACCCGAAACGACCTCGTGCACAGTGGAAGCCAGGCACTCACTCCGACTCCTCCGTGGGCAGTTAAACAGCCCCTGACATGGGGGCCCGGGGGTGGGGGGGCAGGGAGAAGCCTCTTTGCATGGAAAGCACACTTCCCCCACCCCCAGCTCCACCCTCCCCTTCCCCAGAAGGTGGGAGAAGGTGCCCAGAGCATGTTCATTCTGGAGGAGCCTTGCCAGCCCTCTGGAGGTTTGCTAAGAGCACAGGGCTATTTACCTGTGTCTAAAAACTGAGTGATTTGGGTCCTGCAAACAGAACTTAATGTCGT…	ENSSSCG00000007477	intron_variant	MODIFIER	NFATC2	protein_coding	INTRON=3/11,STRAND=-1	ORF_0,ORF_1,acceptor,ESE,ESS,Polyadenylation sites,GY-Box (GY),Musashi binding element (MBE),RNA C-to-U editing site,long stems
sv_29650	17	53397765	53398052	287	DEL	CATTTTTTTTTTTTTTTTTTTTTTTTTTGGTCTTTTTGTCATTTTTTGGGCTGCTCCCGCGGCATATGGAGGTTCCCAGGCTAGGGGTCTAATCAGAGCTGTAGCCGCCGGCCTACGCCAGAGCCACAGCAACACAGGATCCGAGCCGCGTCTGCAACCTACACCACAGCTCACGGCAACGCCGGATCGTTAACCCACTGAGCAAGGGCAGGGACCGAACCCGCAACCTCATGGTTCCTAGTCGGATTCGTTAACCACTGCGCCACGACGGGAACTCCACATTTT	C	ENSSSCG00000007481	intron_variant,feature_truncation	MODIFIER	ZFP64	protein_coding	INTRON=5/8,STRAND=-1	ESE,SXL binding site,C-to-U RNA editing sites
sv_29788	18	3842025	3842111	86	DEL	TAGCATGGACGTGCCCCACCTCTCTTCCGTGGGTCCCCTCCCATGTATCATGGACGTGACCTCTCTTCCACGGGTCCCACCCCGCAG	T	ENSSSCG00000016423	intron_variant,feature_truncation	MODIFIER	DPP6	protein_coding	INTRON=1/26,STRAND=-1	ESE
sv_29812	18	4620448	4620751	303	DEL	ATTGTCAGTCTTCTTTTTTTTTTGTCTTTTGTCTTTTTTTTTTTTGTCTTTCTTGGGCCACTCCTGTGGCATATGGAGGTTCCCGGGCTAGGGGTCGAATCGGAGCTGTAGCTGCCAGCCTACGCCAGAGCCACAGCAATGCAGAATCCAAGCCGCGTCTGCGACCTACACCACAGCTCACGGCAACGCTAGATCCTTAACCCACTGAGCAAGGCCAGGGATCGAACCCGCAACCTCATGGTTCCTAGTCGGATTCGTTAACCACTGCACCACCACGGGAACTCCATTTTTTTTTTTTTTTGTC	A	ENSSSCG00000016426	intron_variant,feature_truncation	MODIFIER	-	protein_coding	INTRON=11/11,STRAND=-1	ESE,ESS,SXL binding site,C-to-U RNA editing sites
sv_29813	18	4652054	4652331	277	DEL	CAAGAAATGTACTCTGGAGTTCCCGTCGTGGCGCAGTGGTTAACGAATCCGACTAGGAACCATGAGGTTGTGGGTTCGGTCCCTGCCCTTGCTCAGTGGGTTAACGATCCGGCGTTGCCGTGAGCTGTGGTGTAGGTCACAGATGCGGCTCAGATCCTGCGTTGCTGTGGCTCTGGTGTAGGCCGGTGGCTACAGCTCCGATTAGACCCCTAGCCTGGGAACCTCCATATGCCGCGGAAGTGGCCCAAAGAAATAGCAAAAAAGACAAAAAAAAAAAA	C	ENSSSCG00000016426	intron_variant,feature_truncation	MODIFIER	-	protein_coding	INTRON=10/11,STRAND=-1	ESE,ESS,C-to-U RNA editing sites
sv_29831	18	5418190	5419615	1425	DEL	AGTTGCTTTGCTGTAATAAAGTCAAATCTTTCTTTTTTAAGAAAGGTGCACATAAAATGGTTAAATTTTTAATTTATTTTTATTAAGATATAATTCACAAAATTCACCCTTAAAAAATATTTAATTCAGGAGTTCCTGCTGTGGTGTAGTGGGTTAAGAATTCGACTGCAGGAGCTCCCAACGTGGTGCATCGGAAATGAACCCAACTAGGAACCATGAGGTTGCAGGTTCCATCCCTGGCCTCGCTCAGTGGGTTAAGGATCTGGTATTGCTGTGAGCTGTGGTGTAGGTCACAGACACAGCTCAGATCTGGCGTTGCTGTGGCTGTGGCTGTGGCTGGCAACTGTAGCTCTGATTCAACCCCTAGCCTGGGAACCTCCATGTGCCATTGGTGTGGCC…	A	ENSSSCG00000016431	intron_variant,feature_truncation	MODIFIER	GALNTL5	protein_coding	INTRON=2/9,STRAND=-1	ORF_0,ORF_1,acceptor,ESE,ESS,Musashi binding element (MBE),Polyadenylation_site
sv_29838	18	5897531	5897837	306	DEL	TAGACTCTTGTGTTTTTTTTGTTTTTTTGTTTTTTTGTTTTTTTTTTTTTGTCTTTTCGCTGTTTCTTTGGGCCACTCTCGCGGCATATGGAGGTTCCCAGGCTAGGGGTCGAATCGGAGCTGTAGCTGCCAGCCTTCGCCAGAGCCACAGCAACGCAGGATCCGAGGCCGCTTCCGCGACCTACACCACAGCTCATGGCAACGCCGGATCGTTAACCCACTGAGCAAGGGCAGGGAATGAACCTGCAACCTCATGGTTCCTAGTTGGATTCGTTAACCACTGCGCCACGACGGAAACTCC	T	ENSSSCG00000016437	intron_variant,feature_truncation	MODIFIER	-	protein_coding	INTRON=8/8,STRAND=1	ESE,SXL binding site,GU-rich destabilization element
sv_29840	18	6193747	6194358	611	DEL	TTAAAGATCACAGCAGGAGTTCCCGTCGTGGCGCAGTGGTTAACAAATCCGACTAGGGGGAGTTCCCGCCGTGGCGCAGTGGTTAACGAATCCGACTAGGAACCATGAGGTTGCGGGTTCGGTCCCTGCACTTGCTCAGTGGGTGGACGATCCGGCGTTGCCGTGAGCTGTGGTGTAGATTGCAGACTCAGCTCGGATCCTGCGTTGCTGTGGCTCTGGCGTAGGCCGGTGGCTACAGTTCCGATTAGACCCCTAGCCTGGGAACCTCCACATGCCGCGGAAGCGGCCCAAAGAAGTATCAAAAAGACAAAAAAAAAAAAAAAAAAAAAAAAAAAAAACAAAAAAACAAATCCGACTAGGAACCATGAGGTGGCGGGTTCGGTCCCTGCCCTTGCTCAG…	T	ENSSSCG00000027986	intron_variant,feature_truncation	MODIFIER	ABCB8	protein_coding	INTRON=1/15,STRAND=-1	donor,ESE,ESS,UNR binding site,Polyadenylation Signal (PAS)
sv_29894	18	8892383	8892448	65	DEL	CTGGGAACCTCCATATGCCGCGGGAGCGGCCCAAGAAATAGCAAAAAGACAAAAAAATAATAATAA	C	ENSSSCG00000013470	intron_variant,feature_truncation	MODIFIER	MRPS33	protein_coding	INTRON=2/2,STRAND=1	ESS,C-to-U RNA editing sites
sv_29900	18	9233852	9234349	497	DEL	GGCATTGCTGTGAGCTGTGGTGTAGGTCACAGACACGGCTCTGATCTGGCGTTGCTGTGGATCTGCCTTAGGCCAGCAGCAACAACTCGGATTAGACCCCTAGCCTGGGAACCTCCATATGCTGTGGGAGCGGCCCTAAAAACACAGAAGACCAAAAAAAAAAAAAAAAAGAAGAAGAAGTACCAAAATCACATAATTTGAGGGCCCAGGAAGCAATTCAGCCCCAGAGGAGGTTGCAGCCCTTTGCCAGGCTGTGGGCTCCCAAGAAGCAGGAACTTCTTACCTTTGCATCACCAGCTGTGAGTTTAATTCCACCCTTAGAAGATGCTTATTAAACATGCAGATGGGGAGTTCTCATCGTGACTCAGTGAAAATGAATCTGACTAGTATCCATGAGGA…	G	ENSSSCG00000016497	intron_variant,feature_truncation	MODIFIER	DENND2A	protein_coding	INTRON=3/20,STRAND=1	ESE,C-to-U RNA editing sites
sv_29914	18	10020514	10020579	65	DEL	AGAGACAGATGCAGAAGGGCAGCCTCCAGCTCCCGCTGCCCGGGCCTGGGCTGCAGGCAGGCTCAG	A	ENSSSCG00000026733	intron_variant,feature_truncation	MODIFIER	HIPK2	protein_coding	INTRON=3/14,STRAND=1	ESE,C-to-U RNA editing sites
sv_29915	18	10282088	10282204	116	DEL	CAGTAATTTTTATCATTGTCCTTTTCAATACCATAGTTGGAATCCCATTTTGTACTTCCTTGCATTTCCTCATCTTCCATATTTAGGTACATTATCTCGAGTTCATAGATAAAAAGA	C	ENSSSCG00000016509	intron_variant,feature_truncation	MODIFIER	FMC1-LUC7L2	protein_coding	INTRON=7/10,STRAND=-1	Musashi binding element (MBE),Polyadenylation Signal (PAS),C-to-U RNA editing sites
sv_29956	18	13806603	13806603	58	INS	A	ATTTGGGAGGAAAATGAAGTGTAGCAGAAATTTGTAACATGCAAAATTAAACTGGATTT	ENSSSCG00000030386	intron_variant,feature_elongation	MODIFIER	NUP205	protein_coding	INTRON=1/42,STRAND=-1	ESE,Polyadenylation Signal (PAS)
sv_29986	18	15535502	15535795	293	DEL	CAAAAAATGAAATGGGAGTTCCCGTCGTGGCGCAGTGGTTAACGAATCCGACTAGGAACCATGAGGTTGCGGGTTCGGTCCCTGCCCTTGCTCAGTGGGTTAAGGATCCGGCGTTGCCGTGAGCTGTGGTGTAGGTTGCAGACGCGGCTCGGATCCCGCGTTGCTGTGGCTCTGGCGTAGGCTGGTGGCTACAGCTCCAATTGGACCCCTAGCCTGGGAACCTCCATATGCCACGGGAGCGGCCCAAGAAATAGCAACAACAACAACAAAAAGACAAAAGACAAAAAAAAAAAA	C	ENSSSCG00000016543	intron_variant,feature_truncation	MODIFIER	EXOC4	protein_coding	INTRON=10/17,STRAND=-1	ESE,ESS,Polyadenylation Signal (PAS),C-to-U RNA editing sites
sv_30056	18	20690333	20690390	57	DEL	AGGCAAAAAAAAAAAAAAAAAAGCTTATTGTACGGTACAATTAAAATGGGTGCATTTT	A	ENSSSCG00000016592	intron_variant,feature_truncation	MODIFIER	FSCN3	protein_coding	INTRON=3/5,STRAND=-1	C-to-U RNA editing sites
sv_30108	18	24386717	24386782	65	DEL	CAACTATCAGAGAATATGGGCGTGTTGTCTCCCTAAGGGGATGTGGGCTTTATTTCTCCCACAGGA	C	ENSSSCG00000016611	intron_variant,feature_truncation	MODIFIER	CADPS2	protein_coding	INTRON=1/27,STRAND=1	ESE,C-to-U RNA editing sites
sv_30114	18	24673872	24674206	334	DEL	CGCTCAGTGGGTTAAGGATCTGGCGTTGCCGTGAGCTGTGGTGTAGGTCACAGACGCAGCTTGGATCTGGCGTTGCCGTGGCTCTGGCTTAGGCTGGAGGCTACAGCTCTGATTCGACCCCTAGCCTGGGAACCTCCATATGCTGCGGGTGCGGCCCTAAAAAGGCAAAAAAAAAAATATATATATATATATATATGTTATATATATATGTGTGTGTGTGTGTATATATATATATATATATATATATAACTTTTTTTCAGGCAGTTTCTATTGTGGCCCAGTGGGTTACGAAACTGCCTTGAATCCATAAGGATGCGGGTTCGATGCCTGGCATT	C	ENSSSCG00000016611	intron_variant,feature_truncation	MODIFIER	CADPS2	protein_coding	INTRON=8/27,STRAND=1	ESE
sv_30200	18	31814789	31814789	56	INS	G	GTTTGGGATTTTTCTAAATAGACAATCATGTCATCTGCAAATAAATAATTCTATCTC	ENSSSCG00000016639	intron_variant,feature_elongation	MODIFIER	FOXP2	protein_coding	INTRON=2/19,STRAND=-1	Polyadenylation Signal (PAS)
sv_30320	18	39555802	39555873	71	DEL	AAAAAAAAAAAAAAAACCTCTCAATCTACTTCCCTCCATTGCTCACTTCCACTGCCCACTCCACTCATCCTC	A	ENSSSCG00000016665	intron_variant,feature_truncation	MODIFIER	BMPER	protein_coding	INTRON=6/15,STRAND=-1	ESE
sv_30332	18	40553201	40553476	275	DEL	CTTGGGCCAGGGATCAGATCCAAGCCACAGTTGCGACCTAAGCCACAGCGGCGTCAATGCCAGATCCTTAACCTACTGTGCCTGACCAGGAATCAAACCTGCATCCCAGCACTCCCAAGACACTGCCGATCCTGGTGCGCTTTTGGAGTGGTCGAGTGTTCTGTAGGTTTCTGTGAGGTCTAGTTAGTTTGTAGTGTTGTTGCAGTCTTCTGTTTTGTTGTTGATCTTCTCTCTACTTGTTTTATCCATGTGGAATATCAAAGTCTCTAATTATTA	C	ENSSSCG00000038919	intron_variant,feature_truncation	MODIFIER	RP9	protein_coding	INTRON=4/6,STRAND=1	donor,acceptor,Musashi binding element (MBE)
sv_30357	18	41931544	41931818	274	DEL	TAAAAAATACTTATCGCAGAGTTCCCGTCGTGGCGCAGTGGTTAACGAATCCGACTAGGAACCATGAGGTTGCGGGTTCGGTCCCTGCCCTTGCTCAGTGGGTTAAGGATCCGGCGTTGCCGTGAGCTGTGGTGTAGGTTGCAGACGTGGCTTGGATCCCGCGTTGCTGTGGCTCTGGCGTAGGCTGGTGGCTACAGCTCCGATTAGACCCCTAGCCTGGGAACCTCCATATGCCGCGGGAGTGGCCCAAGAAATGGCAAAAAGACAAAAAAAAA	T	ENSSSCG00000016672	intron_variant,feature_truncation	MODIFIER	ADCYAP1R1	protein_coding	INTRON=11/14,STRAND=-1	ESE,C-to-U RNA editing sites
sv_30367	18	42413514	42413612	98	DUP:TANDEM	CAAACTCCTATTGTTCAAGGGTCAGCTGTGCTGAGTTCGAGATGCTTGTTTTATCTGTCCAAGTGAGCAGCAAAAAATATTTGTGAACATTTATTAAGA	CAAACTCCTATTGTTCAAGGGTCAGCTGTGCTGAGTTCGAGATGCTTGTTTTATCTGTCCAAGTGAGCAGCAAAAAATATTTGTGAACATTTATTAAGAAAACTCCTATTGTTCAAGGGTCAGCTGTGCTGAGTTCGAGATGCTTGTTTTATCTGTCCAAGTGAGCAGCAAAAAATATTTGTGAACATTTATTAAGA	ENSSSCG00000016679	intron_variant	MODIFIER	-	protein_coding	INTRON=1/3,STRAND=1	-
sv_30387	18	43368018	43368103	85	DEL	AATCTGACTAGGAACCATGAGGTTGCGGGTTCGGTCCCTGCCCTTGCTCAGTGGGTTAACGATCCGGCGTTGCCGTGAGCTGTGGT	A	ENSSSCG00000016687	intron_variant,feature_truncation	MODIFIER	-	protein_coding	INTRON=1/11,STRAND=-1	ESE,C-to-U RNA editing sites
sv_30434	18	45663412	45663412	65	INS	G	GTCTGAGTGAGGAGCAGAGAGGCAGACTGAGACCCCCACAGGTGGCAGAATAAATAGGAGACTGCC	ENSSSCG00000016708	intron_variant,feature_elongation	MODIFIER	SKAP2	protein_coding	INTRON=4/10,STRAND=1	ESE,Polyadenylation Signal (PAS)
sv_30519	18	49008912	49009232	320	DEL	ACCCCAAAGGTCCTTTTTATTTTTTTTTATTTTTATTTTTTTTGTCTTTTGTCTTTTTGTTGTTGTTGTTGTTGTTGTTGTTGCTATTTCTTGGGCCGCTCCCTCGGCATATGGAGGTTCCCAGGCTAGGGGTCGAATCGGAGCTGTAGCCACCGGCCTACGCCAGAGCCACAGCAACGCGAGATCCGAGCCGCGTCTGCAACCTACACCACAGCTCACGGCAACGCCGGATCCTTAACCCACTGAGCAAGGGCAGGGACTGAACCCGCAACCTCATGGTTCTTAGTCGGATTTGTTAACCACTGCGCCACGACGGGAACT	A	ENSSSCG00000016725	intron_variant,feature_truncation	MODIFIER	TNS3	protein_coding	INTRON=2/31,STRAND=1	ESE
sv_30520	18	49145849	49146126	277	DEL	TTTTTTGTCTTTTTTGTTGTTGTTGCTATTTCTTGGGCCGCTCCCGCGGCATATGGAGGTTCCCAGGCTAGGGGTCGAATCAGAGCTGTAGCCACCGGCCTACGCCAGAGCCACAGCAACGCGGGATCCGAGCCGGGTCTGCAACCTACACCACAGCTCACGGCAACACCGGATCGTTAACCCACTGAGCAAGGGCAAGGACCGAACCCGCAACCTCATGGTTCCCAGTCGGATTCGTTAACCACTGCGCCACGACGGGAACTCCATTTTTTTTTTTA	T	ENSSSCG00000016725	intron_variant,feature_truncation	MODIFIER	TNS3	protein_coding	INTRON=20/31,STRAND=1	ESE,SXL binding site
sv_30553	18	50623098	50623369	271	DEL	AACACAACCAGGAGTTCCCATCGTGGCGCAGTGGTTAACGAATCCGACTAGGAACCATGAGGTTGCGAGTTCGGTCCCTGCCCTTGCTCAGTGGGTTGATGATCCGGCGTTGCCGTGAGCTGTGGTGTAGGTTGCAGACACGGCTCGGATCCCACGTTGCTGTGGCTCTGGCGTAGGCCAGTGGCTACAGCTCCCATTGGACTCCTAGCCTGGAAACCTCCATATGCCGTGGGAGCGGCCCAAGAAACAGCAAAAAGACAAAAAAAAACCCC	A	ENSSSCG00000016743	intron_variant,feature_truncation	MODIFIER	OGDH	protein_coding	INTRON=11/23,STRAND=-1	acceptor,ESE,C-to-U RNA editing sites
sv_30590	18	52530156	52530156	67	INS	C	CCTTCCTCTCCAGGAATCTATCTTGCCTTATTTATTTGTTGGTGTTTATGGCTGCATCTGCTGCATAA	ENSSSCG00000016763	intron_variant,feature_elongation	MODIFIER	GLI3	protein_coding	INTRON=3/14,STRAND=1	ESE
sv_30650	X	2946487	2946638	151	DEL	TAGCCTTACTTCTTTTTTTTTTTTTATTTTCCCACTGTACAGCAAGGGGGTCAGGTTATCCTTACATGTATACATTACAATTACAGTTTTTCCCCCACCCTTTCTTCTGTTGCAACATGAGTATCTAGATATAGTTCTCAATGCTATTCAGC	T	ENSSSCG00000033643	intron_variant,feature_truncation	MODIFIER	-	protein_coding	INTRON=4/9,STRAND=-1	ESE,SXL binding site,Musashi binding element (MBE)
sv_30696	X	6954256	6954337	81	DEL	GTGGTGTGTGTGTGTTGGGGGATCATTGTGGGGGCAGAAAATACTGGTATGCTTGTTGTGTGTGTGTGTGTGTGTGGTTTTT	G	ENSSSCG00000024809	intron_variant,feature_truncation	MODIFIER	CLCN4	protein_coding	INTRON=2/14,STRAND=1	ESE
sv_30943	X	33937817	33938106	289	DEL	CAAAGAAAACACTCATCTGGGAGTTCCCGTCGTGGCGCAGTGGTTAACGAATCCGACTAGGAACCATGAGGTTGCAGGTTCAGTCCCTGCCCTTGCTCAGTGGGTTAACGATCCGGCGTTGCCGTGAGCTGTGGTGTAGGTTGCAGACACGGCTCGGATCCCGCGTTGCTGTGGCTCTGGTGTAGGCCGGTGGCTGCAGCTCTGATTCAATCCCTAGCCTGGGAACCTCCACATGCTGCGGGAGCAGCCCAAGAAATAGCAAAAAGACAAAAAAAAAAAAAAAAAAAAAA	C	ENSSSCG00000012233	intron_variant,feature_truncation	MODIFIER	SYTL5	protein_coding	INTRON=5/19,STRAND=1	ESE,ESS,C-to-U RNA editing sites
sv_31193	X	51738259	51738644	385	DEL	TTGGAATGGATTAGCAATGAGATCCTGCTGTATAGCACTGGGAACCATGTCTGGTCACTTGTGATGGAGCATGATAATATGAGAAAAAATAATTGTATACATGTATGTGTGACTGGGTCACCTTGCTGTGCAGTAGAAAATTGACAGAACACTGTAAACCAGCAATAACAGAAACAATAAAAATCATTATAAAATTATAATGTCACTTATATCTGGAATCTTATATCACTTATAATATCACTTATATCTGGAATATGACACAAATGAAGCTTTCCACAGAAAAGAAAATCATGAACATGGAGAACAGATTTGTGGTTGCCAAGGGGGAGAGGCAGGGAGTGGGATGGACTGGGCATTTGGGGTTAGTAGATGCAAACTATTGCATA	T	ENSSSCG00000012367	intron_variant,feature_truncation	MODIFIER	ZC3H12B	protein_coding	INTRON=3/6,STRAND=1	ESE,ESS,Polyadenylation sites,Musashi binding element (MBE),C-to-U RNA editing sites,Polyadenylation_site
sv_32056	X	98145488	98145549	61	DEL	GCATTGCCACAGCTGTGGCATAGGCCGAAGCTGTGGAGTAGGTTGCAGCTATGGCTTGGATT	G	ENSSSCG00000012619	intron_variant,feature_truncation	MODIFIER	SEPTIN6	protein_coding	INTRON=1/15,STRAND=-1	ESE
sv_32162	X	110935059	110935358	299	DEL	TAAAACATCGCCCTGGAGTTCCTGTTGTGGCGCAGTGGTTAACGAATCTGACTAGGAACCATGAGGTTGCGGGTTCGGTCCCTGACCTTGCTCAGTGGGTTAAGGATCTGGCGTTGCCGTGAGCTGTGGTGTAGGTTGCAGATGTGGCTCGGATCCCGCGTTGCTGTGGCTCTGGCATAGGCCGGTGGCTACAGCTCCGATTCGACCCCTAGCCTGGGAACCTCCATATGCGGCGGGAGCGGCCCAAGAAATAGCAACAACAACAAAGACAAAAAAAAAGACAAAAAAAAAAAAAAAAAA	T	ENSSSCG00000012691	intron_variant,feature_truncation	MODIFIER	ZNF449	protein_coding	INTRON=3/3,STRAND=1	ESE,ESS,C-to-U RNA editing sites
sv_17417	9	126782736	126782887	151	DEL	AAAAAGACAAACAACAACAACAACAAAATATATATATGTAATAAAGTTTTCAGAAGAGGCAGTCTTTGCTCAGACATACTGCTTAAAAACTATTTAGAAATAGAATCAGACAAGTCTTTAATGCACAGAAAAGACAAACAATTTATTTCCTC	A	ENSSSCG00000019156	upstream_gene_variant	MODIFIER	U6	snRNA	DISTANCE=1461,STRAND=1	-
sv_30896	X	26196709	26196855	146	DEL	CAAAATTAATACACAGAAATTGACGGCATTTCTATACACTAACAATGAAAGATCATTTACCATCGCATCCAAAAGAATAAAATACCTAGGAGTAAACCTACCTAAAGGGACAAAAGACCTGTACTCTGAAAACTATAAGCCACTGAT	C	ENSSSCG00000050938	non_coding_transcript_exon_variant,feature_truncation	MODIFIER	-	pseudogene	EXON=2/2,STRAND=-1	-
sv_22449	13	104385358	104385419	61	DEL	GATGTAGTGCATACAAAGAGAGAAGCCAAGAGTCCTTCTGTAAGACAAATATGAAACACTGA	G	ENSSSCG00000041886	downstream_gene_variant	MODIFIER	-	processed_pseudogene	DISTANCE=3040,STRAND=1	-
sv_00371	1	20379000	20379298	298	DEL	GGGAGGAGTTCCCGTCGTGGCGCAGTGGTTAACGAATCCGACTAGGAACCATGAGGTTGTGGGTTCGGTCCCTGCCCTTGCTCAGTGGGTTAACGATCCGGCGTTGCCATGAGCTGTGGTGTAGGTCGCAGACGCGGCTCGGATCCCGCGTTGCTGTGGCTCTGGCGTAGGCCGGTGGCTACAGCTCCGATTCAACCCCTAGCCTGGGAACCTCCATATGCCGCGGGAGCGGCCCAAGAAATAGCAACAACAACAACAACAAAAGACAAAAAGACAAAAAAAAAAAAAAAAAAAAGTTT	G	ENSSSCG00000051757	intron_variant,non_coding_transcript_variant,feature_truncation	MODIFIER	-	lncRNA	INTRON=1/1,STRAND=-1	-
sv_00994	1	67866158	67866358	200	DEL	CTTTTGATTAAATGTATTTGAGCAGTGTGTTGTATAGGGTGTAGAATGGTTTTAGAATCAGGAGACCAAGGGTCTACTCATGGTTCTGCCTAGAGTCAGCAGCATGATCTGGGGTAAACAATGTGATTTTTCTAAGACTTAGTTTCTATGGCTGTAAAAAGGAAAGTATGATATTTATAATCTTTACGGTCTTTTGAAGAT	C	ENSSSCG00000049859	intron_variant,non_coding_transcript_variant,feature_truncation	MODIFIER	-	lncRNA	INTRON=3/3,STRAND=1	-
sv_01291	1	99037702	99037991	289	DEL	ACCCAAACCACTATTTTATTTTATTTTATTTTATTTTATTTGTCTTTTTGCTATTTCTTTGGGCCGCTCCTGCGGCATATGGAGGTTCCCAGGCTAGGGGTCCAATCGGAGCTGTAGCTGCCAGCCTACGCCGGAGCCACAGCAACACGGGATCCGAGCCGCGTCTGCAACCTACACCACAGCTCACGGCAACACCGGATCGTTAACCCACTGAGCAAGGGCAGGGATCGAACCCGCAACATCATGGTTCCTAGTCGGATTCGTTAACCACTGCGCCACGACGGGAACTC	A	ENSSSCG00000034415	intron_variant,non_coding_transcript_variant,feature_truncation	MODIFIER	-	lncRNA	INTRON=2/2,STRAND=-1	-
sv_01806	1	156475958	156475958	97	INS	T	TGTATCATAAACTGAATTTACTTAACCCAAAAAAAGCTTGCTTTTCCTCTGACCTGAAATCTGAGAAGTTACCATTAGTGAATCATACAGTAACCTGA	ENSSSCG00000049207	intron_variant,non_coding_transcript_variant,feature_elongation	MODIFIER	-	lncRNA	INTRON=1/1,STRAND=-1	-
sv_02190	1	201864416	201864476	60	DEL	CCTGGCCTCACTCAGTGGGTTAAGGATCTGGCATTGCTGTGAGCTGTGGTGTGGGTCACAG	C	ENSSSCG00000049390	downstream_gene_variant	MODIFIER	-	lncRNA	DISTANCE=3447,STRAND=-1	-
sv_02424	1	228504556	228505025	469	DEL	TGTGGTGTGATGAGGAGTGGCCACAGCCTTGTGACACAGCCAGGTAAGTGCTATGATAAAGACCTGTCAAAGGTCCTGGGGAAATGGAGGGGGCAGGTGGTGAAAGGAGCCTGAGCTCAGCCTGGTGTATGTGGTGGGCTGAATGATGGCTTTCCCAAAGCATACGTGACCTTATTTGGAAAAAGGGTCTTTGCAGATATAATTAAGGATCCTCAGATGAGATCATTCTGGATTAGGTAGGGTCTTAAATCCAATGGCAATGTCCCTGTAAGAGACAGAAAAAGAGAAAACAAAGACACAGAAAGGCCATGTGAAAATAGAGGTGGAAATTTGAGATTTGTTGCCAAATCGAAGGACTACTTCTAGCCACCAGAAGCTGGCAGAGGCAAGCAGGAATCT…	T	ENSSSCG00000049398	non_coding_transcript_exon_variant,intron_variant,feature_truncation	MODIFIER	-	lncRNA	EXON=8/9,INTRON=8/8,STRAND=1	-
sv_02755	1	253774091	253774167	76	DEL	TTTCTGGAGGACTCGTTCTGTTTGTTGACCCCTTGCAGTCGGACCTGGATCCAGGGGTCTGAGCTGCCTCTGCGACC	T	ENSSSCG00000049145	intron_variant,non_coding_transcript_variant,feature_truncation	MODIFIER	-	lncRNA	INTRON=1/2,STRAND=-1	-
sv_02985	1	269446828	269447137	309	DEL	CAAGAAATGGGTTCATTGGGAGTTCCCGTCATGGCACAGTGGTTAACGAATCCGACTAGGAACCATGAGGTTGCGGGTTCGGTCCCTGCCCTTGCTCAGTGGGTTAACGATCCGGTGTTGCCATGAGCTGTGGTGTAGGTCGCAGATGCGCCTCGGATCCCGCGTTGCTGTGGCTCTGGTGTAGGCCGGTGGCTACAGCTCCGATTGGACCCCTAGCCTGGGAACCTCCATATGCCGCGGGAGCGGCCCAAGAAATAGCAACAACAACAAAAAGACAAAAAGACCGAAAAAAAAAAAAAAAAAAGAAAAA	C	ENSSSCG00000046705	non_coding_transcript_exon_variant,feature_truncation	MODIFIER	-	lncRNA	EXON=2/2,STRAND=-1	-
sv_02988	1	269784000	269784090	90	DEL	GACTTACAAACCAACTGAGGTTAGCAGAGGAGGGAGGGAGGGGCTGCAAGGGGGTGCTGGGGTTTGGAACAAACGGAGCTAAGCCGCACCT	G	ENSSSCG00000050745	non_coding_transcript_exon_variant,intron_variant,feature_truncation	MODIFIER	-	lncRNA	EXON=1/2,INTRON=1/1,STRAND=1	-
sv_04577	2	127282508	127282693	185	DEL	CAGATCACTGAGTCACTGAGCAAGGCCAGGTGTAGAACCTGCATGCTCAGGGATGCTACTCGCATTTATTCCTGTTGTGCCACATCGGGAACTCCTCTCTTTTTTTTTTTTTAATAGAATTTGTTACTGGATTGAAGACTATGTGCATTTAAATATTGAGGTAGTTTATAAATATATAATTAATGA	C	ENSSSCG00000040936	intron_variant,non_coding_transcript_variant,feature_truncation	MODIFIER	-	lncRNA	INTRON=3/3,STRAND=-1	-
sv_05019	3	1224038	1224038	76	INS	C	CCTCGGTGGCATCTCCACACGTGTGACTTGGACGTGTCTGCATCTGTTTCCAGGCGTCTGTACGGAT	ENSSSCG00000048640	upstream_gene_variant	MODIFIER	-	lncRNA	DISTANCE=3959,STRAND=1	-
sv_05101	3	5869128	5869413	285	DEL	TATAAGAAGTGATGCTGGAGTTCCCGTCGTGGCGCAGTGGTTAACGAATCCAACTAGGAACCATGAGGTTGCGGGTTCGGTCCCTGCCCTTGCTCAGTGGGTTAACGATCTGGCGTTGCCGTGAGCTGTGGTGTAGGTTGCAGACGCGGCTCGGATCCCACGTTGCTGTGGCTCTGGCGTAGGCCAGTGGCTACAGCTCCAAATTGACCCCTAGCCTGGGAACCTCCATATGCCACGAGAGCGGCCCAAAGAAATAGCAAAAAGACAAAAAATAAAATAAAATAAA	T	ENSSSCG00000045145	intron_variant,non_coding_transcript_variant,feature_truncation	MODIFIER	-	lncRNA	INTRON=1/1,STRAND=1	-
sv_05207	3	12784754	12784833	79	DEL	ACTCCCTTTTTTTTTTTTTTTTTTTTTTTTTTTTGCTGATAATTCTTAAACCACTGGACCTTCCAAGCTAGCCACTCCTG	A	ENSSSCG00000036217	intron_variant,non_coding_transcript_variant,feature_truncation	MODIFIER	-	lncRNA	INTRON=3/3,STRAND=-1	-
sv_05210	3	13131443	13131709	266	DEL	TTTTTTTTTTTTTTTAAACTCTTTCTGTGAGTTTGTGGTTCATCCCCCTTGATCAGGTTTCAGTTGAGTTGGTGGTCTTTCTGGGCAACAGGTTCACTCAGAGAAGCACAGGCAGCTGAGCATATCCCCACCCAGAGAATGTTCACAGTGAAGAGAGGAAGCCAGGGCAACGAAGGTCTTCTGGGGGAATTTCAGACCTGATGAGAGCCGGCTTGGGGAATTATTAGGCCTCCAGGTGGACCCAGCCCTCCCGCTTCACACCCTCTC	T	ENSSSCG00000047001	downstream_gene_variant	MODIFIER	-	lncRNA	DISTANCE=3648,STRAND=-1	-
sv_06439	3	114857483	114857786	303	DEL	GAAAAGACAAAAAATAGGGAGTTCCCGTCGTGGCGCAGTGGTTAACGAATCCGACTAGGAACCATGAGGTTGCGGGTTCGGTCCCTGCCCTTGCTCAGTGGGTTAACGATCCGGCGTTGCCGTGAGCTGTGGTGTAGGTTGCAGACGCGGCTCGGATCCCGCGTTGCTGTGGCTCTGGCGTAGGCCGGTGGCTACAGCTCCGATTCGACCCCTAGCCTGGGAACCTCCATATGCCGCGGGAGCGGCCCAAGAAATAGCAACAACAACAACAACAAAAAAGACAAAAGACAAAAAAAAAAAAAAA	G	ENSSSCG00000044963	upstream_gene_variant	MODIFIER	-	lncRNA	DISTANCE=4836,STRAND=-1	-
sv_06647	3	127655889	127655948	59	DEL	TGGGCTTGGGCAGCCCAGCTGAGTTTCCCCCTGCCAGCACAGCCTCACGTCACTCTGCTC	T	ENSSSCG00000049451	upstream_gene_variant	MODIFIER	-	lncRNA	DISTANCE=357,STRAND=1	-
sv_06674	3	129584766	129584821	55	DEL	ACCTCACCACTCCCATGATGGGTCCCACCTGCCACAGCTAATAAACCAAGACAAGG	A	ENSSSCG00000033103	non_coding_transcript_exon_variant,feature_truncation	MODIFIER	-	lncRNA	EXON=3/3,STRAND=-1	-
sv_06826	4	7546004	7546058	54	DEL	TATGACGTACAGTGAGGGAAGGAGGGTACCGTATATACAATATGCACCATAGGTA	T	ENSSSCG00000041689	upstream_gene_variant	MODIFIER	-	lncRNA	DISTANCE=4548,STRAND=-1	-
sv_06896	4	10872776	10873156	380	DEL	CTCAAAATATCTTTTTTTTTTTTCATTTTTCTGCATGATTTTAATACACTCAGGGACAGATATTTTCCCTCTTGAGTAACATTCCTCTAGCACAATAATGTATGGGAGAATAAAATATATTAATTGAGCCTACTTAATAACGCTGATTGCTAGTACCTATCTGTTTTTGTATAGATATTTAGCAATTTCTTATAATGGATTCTTCCGCCTTTACTCCATACCCCAGAGAATGTCTTTTGATGGTAATTTATTGGAATATTTGATTGGTTAAATAATTTCGTATGTCAGACAATTTTGTAAATAACATGTTTTTCCCCCAAAGAATCAAGTTAAGGATGGAAACCTTCTCAAAATTAGCCAGAGTTATAATTATCATCTAAT	C	ENSSSCG00000047619	intron_variant,non_coding_transcript_variant,feature_truncation	MODIFIER	-	lncRNA	INTRON=3/9,STRAND=1	-
sv_07258	4	36465327	36466066	739	DEL	AGCCTTCCTCATAATCCAGTTACTGTGGGGCATTTTATTTCTTTTTTCTACTTCTTTTTTTTTGTTTGTTTTTTTGTTTGTTTGTTTCTTTTTACATGGCATATGGAGGTTCCCAGACTAGGGATCAAATTGGAGCTACAGGAGTTCCTGTCGTGGCGCAGTGGTTAACAAATCCGACTAGGAACCATGAGGTTGCGGGTTCCATCCCTGGCCTTGCTCAGTGGGTTAAGGATCTGGCATTGTTGTGAGCTGTGGTATAGGTTGCAGACAGGGCTCTGATTCTGTGTTGCTGTGGCTCTGGCATAGGCCGGTGGCTACAGCTCCAATTCGACCCCCTAGCCTGGGAACCTCCATATGCCTCGGGAGTGGCCCAAGAAATGGCAAAAAGACAAAAAAAAA…	A	ENSSSCG00000041192	upstream_gene_variant	MODIFIER	-	lncRNA	DISTANCE=4069,STRAND=1	-
sv_07440	4	57412714	57412951	237	DEL	AGGTTCACCACAATATATAAGGCAACTGCTAACAACCTTAAAAGGACAAATCAACAATAACACAATCATAGTGGGGGACTTTAACACCCAACCTACAGCAATGGACAGATCAACCAGACAGAAAATCAGTAAGGAAACACAGGCCCTGAATGATGCATTAAACCAGATGGACTTAATAGATATTTATGGGACATTCCATTCAAAAGCAACAGAATACACATTCTTCTCAAGTGCACAT	A	ENSSSCG00000045252	intron_variant,non_coding_transcript_variant,feature_truncation	MODIFIER	-	lncRNA	INTRON=2/4,STRAND=1	-
sv_07662	4	74208966	74209660	694	INV	CTACACCACAGCTCACGGCAATGCCAGATCCTTAACCCACTGAGCAAGGCCAGGGATCGAACCTGCAACCTCATGCTTCCTAGTTGGATTCCTTAACCACTGCACCACGACGGGAACTCCTACAGTGATTCTTTTTTTGTTTTTGGTCACACCCAAGGCATATAGAATTCCTAGTCCAGAGATTAAACCCTCACCACAGCAGTGACAACCCCATATCCTTAGTCCACTGAGCCACTGGGGAACTCTTACAGTGATTCTTAAATTCAGCCCTTTGTTCTCAAGGATTCTTGAGGTGCTGGAATTTACCGTGGGCTGTGGCATTTGTGCCAGCACATTCTTGCACATGGCTAAGGCAAAGGGTCCTTAGGTAGCAAGAAATTACAAATTCTACTAGCAGGT…	CTGCACCACAGCTGCAGCAATGCCAGATCCTTAACCTGATAGGCTACTGGGGAACTCAAAGAAAAGCTCTTGCTGTCACTTCATTCCTGCCATTCTTGTTCACTAATCCATGGAGGCACCTGGGCTCCTGCTCATAAAAACCCTGCCCCTCTAGCCTCCTTATTGATTCTCTGAACTGAAATCTGTCCAGAAAACTTCATTTTTTGCTTAAGTTAACCAAAGCCTAAATATCCTGGTTTTGGCTTGCAATTGAAAAACCCCCATGTGAACAAGTATCCATACATGTGTTACACTTAAACCTGCTAGTAGAATTTGTAATTTCTTGCTACCTAAGGACCCTTTGCCTTAGCCATGTGCAAGAATGTGCTGGCACAAATGCCACAGCCCACGGTAAATTCC…	ENSSSCG00000049613	intron_variant,non_coding_transcript_variant	MODIFIER	-	lncRNA	INTRON=1/1,STRAND=1	-
sv_07849	4	91175444	91176050	606	DEL	CCCTAGTTGCTGTGGCTCTGGCGGAGGCTGGTGGCTACAGCTCCGATTGGACCCCTAGCCTGGGAACCTCCATATGTTGCGGGAGTGGCCCAAGAAATAGCAAAAGGACAATAAATAAATAAATAAATAAATAAATAAATAAATAAAAGTCAAAAGCTTCTAGACAAGTGCTACCAATTTAACTGAAGTAAATCTAACCAAAATCAATGAAAGCTGATATGTGGTTTACCTATACTACCTTACAGAAGCTAAAAGCACAATTTCTTTTTGAGATATTTGTTACAACAGACTTAAAAAACTAATGTAATGATCTTGCTGGGATATTCTAGCAAGAGCTTCACATGGTAGGAAAAGAGAAAAAAACATGACTATAGGATACAGAATTTCATTGATGAGTTG…	C	ENSSSCG00000047615	intron_variant,non_coding_transcript_variant,feature_truncation	MODIFIER	-	lncRNA	INTRON=1/1,STRAND=-1	-
sv_08433	4	127750092	127750422	330	DEL	AGGAATTGCCATTCCTTTTTTTTTTTTTTTTTTTTTTTTTGTCTTTTTTGTTGTTGTTGTTGCTATTTCTTGGGCCGCTCCCTCGGCATATGGAGGTTCCCAGGCTAGGGGTTGAATCGGAGCTGGAGCCACCGGCCTACGCCAGAGCCACAGCAACGCAGGATCTGAGCCGCGTCTGCAACCTACACCACAGCTCACGGCAACGCCGGATCGTTAACCCACTGAGCAAGGGCAGGGATCGAACCCGCAACCTCATGGTTCCTAGTTGGATTCGTTAACCACTGCGCCACGACGGGAACTCCTTTTTTTTTTTTTTTTTTTGTCTTTTTTG	A	ENSSSCG00000049063	intron_variant,non_coding_transcript_variant,feature_truncation	MODIFIER	-	lncRNA	INTRON=2/3,STRAND=-1	-
sv_09852	5	87858899	87859037	138	DEL	TTTCCTAATTTTACAGAGGAGATAAAACATGCAACATATTTGGAGAATTATTAAAAATAATTTGACTCATGCATTGTAATCATAACTAAATAAACATATAGTTATCCATGTATACATATATGTGTTAACCTTTGAACGA	T	ENSSSCG00000050373	downstream_gene_variant	MODIFIER	-	lncRNA	DISTANCE=2133,STRAND=-1	-
sv_10102	5	102299715	102299797	82	DEL	CAGTACCCCACCAACCACCCCGTGAAACTCTTGGGGTACCCGAGTACCCCGCCAACCACCCCATGAAACTCTTGGGGTACCCG	C	ENSSSCG00000051497	intron_variant,non_coding_transcript_variant,feature_truncation	MODIFIER	-	lncRNA	INTRON=5/7,STRAND=-1	-
sv_10466	6	20571181	20571181	117	INS	A	AGTGGATGGGGGTTCAATCCCTGGCCTTGCTCAGGGGGTTGGGGACCTGGCATTGCCATGAGCTGTGGTGTAGGTCGGAGACGTGGCTTGGATCCCGTGTTGCTGTGGCT	ENSSSCG00000051066	intron_variant,non_coding_transcript_variant,feature_elongation	MODIFIER	-	lncRNA	INTRON=2/3,STRAND=1	-
sv_10521	6	24034205	24034274	69	DEL	CCGTGTCTGCGACCTACACCACGGCTCACGGCAACGCCGGATCCTTAACCCACTGAGCAAGGCCAGGGAT	C	ENSSSCG00000047287	intron_variant,non_coding_transcript_variant,feature_truncation	MODIFIER	-	lncRNA	INTRON=3/6,STRAND=-1	-
sv_10548	6	26568850	26568850	53	INS	G	GCTGTGAGCTGTGGGGTAGGTCGCAGACGCGGCTCAGATCCCATGTTGCTATGC	ENSSSCG00000047161	upstream_gene_variant	MODIFIER	-	lncRNA	DISTANCE=1621,STRAND=1	-
sv_10568	6	29128274	29128274	50	INS	G	GCTCACCTTTAAGCCAAGGGAAGTGCCCAGAGAGTGGGGTAATTCTCTCTA	ENSSSCG00000049093	downstream_gene_variant	MODIFIER	-	lncRNA	DISTANCE=2079,STRAND=1	-
sv_10611	6	33250750	33251049	299	DEL	ATTCATTTTTAACCGAATGCCAAATTGAACTCCCACTGGAATTTTGAATTACATCGATCTATAGAGAAATCTGGGGACAAATTACGTTTTTTATTATATTAATGTTTTCTATCCTGCCATGTAGTTAAAGTACGTCTTTCAGTATGATTTCCTAATTTCCTCCATAAGGATAAGGCACATCTTCTGTTTGACTTGTATCTACTTGTTTTATGTTGCTGCTGTAAATCATATTGTTTTTGGTTATACTTTCTAGCTGTTAATGATGTTTAGAAAAGCTATTCACCTCTTTATATTGATTGT	A	ENSSSCG00000042676	intron_variant,non_coding_transcript_variant,feature_truncation	MODIFIER	-	lncRNA	INTRON=1/3,STRAND=1	-
sv_11701	6	144790072	144790177	105	DEL	TGCACAACGGGAACTCTGAGCCAGTGTTCTTTTTTACTCAAAAAAGGTAAAATGGATAGTATCTACTGGGAAATGCACATTCGGTGTTGTGTGTTCCCTGTGCCAG	T	ENSSSCG00000036505	intron_variant,non_coding_transcript_variant,feature_truncation	MODIFIER	-	lncRNA	INTRON=1/4,STRAND=1	-
sv_11882	6	154337380	154337608	228	DEL	GATGATGACGCTTACCAGCCAGTGACCTTACACAAGCTTTAAAATGTTGGGGCTACAGAATGCATAGCACAGAGTAAGTGTTCAACACTCCTTAGCAGTAAAGAGTCAGTTCATTCAGGGGTTGCTGTAAGGACTAAATGAGATAACACATGGAAATTGCTTAGTGAGCATAGTGCCCAGCTCCGAGTAAGCACTCAATAAATTATCACTTAAATGTGGAATCTAAAAC	G	ENSSSCG00000041035	intron_variant,non_coding_transcript_variant,feature_truncation	MODIFIER	-	lncRNA	INTRON=3/4,STRAND=1	-
sv_11943	6	157100404	157100770	366	DEL	TTCAAGTGTACAGCAAAATGATTCAGTTTTATATACATATATGTATATATATATAGTCTTTTTCAGATTCTTTTCCATTATAAGTTATTAAAAGATACTGAATAGAGCTCCCTGTGCTATACAGTAAGTCTTTGTTTTTATCTATTTTATATATAGTAGTGCATATCTGTTGCTCCCAAATTCCCAGTTTATACCCCCCTCCCTTCTTCCTTTTGGTTACCATAAGTTTGTTTCCTATGTCTGTGGATCTATTTCTGTTTCATAAATAAGTTCATTTGTATCTCTTTTTTAGATTCCACATATAAGTGATATATGATGTTTGTCTTTCACTGTCTGACTTACTTCACTTAGTATGATAACCTCTAGG	T	ENSSSCG00000046729	intron_variant,non_coding_transcript_variant,feature_truncation	MODIFIER	-	lncRNA	INTRON=5/5,STRAND=-1	-
sv_12691	7	29342777	29342777	81	INS	T	TACGTACAAAGGTGTAATTTGCCTCTTTCTCTTGCATGCGAAAGACTCTAGAAGTACCCAGAACCAAAACACATTGCCAGGA	ENSSSCG00000041056	intron_variant,non_coding_transcript_variant,feature_elongation	MODIFIER	-	lncRNA	INTRON=2/2,STRAND=-1	-
sv_12882	7	43272743	43272858	115	DUP:TANDEM	AGGTTTATTCAGGCATCATTATTTTAACAGATACTTTCATTTTCTTTTTTTTGTTTGTTTATTTTTTGCTTTTTTTTAGGGCCTCACCCACGGCATGTGGAGGTTCCCAGGCTATG	AGGTTTATTCAGGCATCATTATTTTAACAGATACTTTCATTTTCTTTTTTTTGTTTGTTTATTTTTTGCTTTTTTTTAGGGCCTCACCCACGGCATGTGGAGGTTCCCAGGCTATGGGTTTATTCAGGCATCATTATTTTAACAGATACTTTCATTTTCTTTTTTTTGTTTGTTTATTTTTTGCTTTTTTTTAGGGCCTCACCCACGGCATGTGGAGGTTCCCAGGCTATG	ENSSSCG00000049265	intron_variant,non_coding_transcript_variant	MODIFIER	-	lncRNA	INTRON=1/1,STRAND=-1	-
sv_13133	7	65772649	65772649	51	INS	A	ACCTCGCGGGAAAGCCTTCCCTGCTCCCTCGTTCCTTTCCAAATCTTGTTCT	ENSSSCG00000047592	intron_variant,non_coding_transcript_variant,feature_elongation	MODIFIER	-	lncRNA	INTRON=1/2,STRAND=1	-
sv_13335	7	86216616	86216921	305	DEL	CTGCCACCTCATGGTTACTAGTTGGATTCATTTCCGCTGTGCCTCAATGGGAACTCCACAACTCTTGTTTTTTGATAATAGCCATCCTAGTGGGCACAAAGTGGCCTCTCACTGTGGTTTTGATTTACATTTTCTGGAGAAATTGATTTTTATTTACCAAAGTCACAGTCTTTCTTCAATCAAGAGCTTGTGCATTGTGGCCTGGTGGTTAAGTGCAGGGGTCCAGTGTATGACAGCTTGAGATTCCCGGTGCCCTTCTGTACAGGCTCTGTGATGTTGGTGAGTCACAGCTGCTCTGAGCCTCAA	C	ENSSSCG00000050903	upstream_gene_variant	MODIFIER	-	lncRNA	DISTANCE=1690,STRAND=-1	-
sv_13467	7	97472720	97473081	361	DEL	AAGGTCTTGGGGGGATAAAAAGTACTCCATAATTGTAAAGCTCTCTACACAGAGCACAATTAAGCTGTTGATGAGCAAACTTTAGTGCCTGAAGGAGCAGGAAGGGGTTTTCTAAGGAAGATTGGTTGATTTCTCTTGGTGTGTATTATCTGCAAGTAGAGGATTATATAATGGGCAGGCAGTAAGAACTAGTTGATGAAACTGATTTAGAACTCTGACCTTCTGATTTTAAGGCCAGTGGTCTAGCATCTATAAAATGCTTCTTTTCACTTCACTTCTTTATTGGTTTGAATGCCAATAAAGATAAATAAAACAAATGAAAAAGATAGTTGTGGTGAGCTGTGGTGTAGGCTGGCAGCTGT	A	ENSSSCG00000049747	upstream_gene_variant	MODIFIER	-	lncRNA	DISTANCE=4468,STRAND=1	-
sv_13666	7	108989776	108989864	88	DEL	TTCAGCGTATGCATCATCTGACTGATAGTGTATATTTATTTGCTTAATAAGTATTTTAATACCCTCCACTGGAATGAAAGCACAGGAGG	T	ENSSSCG00000046538	intron_variant,non_coding_transcript_variant,feature_truncation	MODIFIER	-	lncRNA	INTRON=2/2,STRAND=1	-
sv_13935	8	2184691	2184754	63	DEL	CCGGGGCCGCCGTGGCACGCCCTACAGATGCTCATTTCTCACGGCCCTGGGGGCTGGATGTCGG	C	ENSSSCG00000051305	upstream_gene_variant	MODIFIER	-	lncRNA	DISTANCE=4060,STRAND=1	-
sv_14943	8	85546503	85546503	56	INS	C	CTCCATGTCCATGATTTTATTTTCTGTGGAAAGGATCATTTGTGCCATATGTTCAAT	ENSSSCG00000041112	intron_variant,non_coding_transcript_variant,feature_elongation	MODIFIER	-	lncRNA	INTRON=2/5,STRAND=1	-
sv_15671	8	135975055	135975359	304	DEL	AACCTACACCACAGCTCACGGCAACGCCGGATCCTTAACCCACTGAGCAAGGGCAGGGACCGAACCCGCAACCTCATGGTTCCTAGTCGGATTCGTTAACCACTGCGCCACGACGAGAACTCCCTTTTTTTTTTTTTATATATATATCTTTATGAAGTTAAGGAAGTTTTTTTTTTTTTGTCTTTTTAGGGCCAATCCCGAAGCATATGAAAGTTTCCAGGCTAGGGGTTGAGCTGGAGCTGCAGTCACCAGCCCACACCACCGCCACAGCAATGCTGGATCCTTGGATCCAAGCCGTGTCTGCG	A	ENSSSCG00000048397	intron_variant,non_coding_transcript_variant,feature_truncation	MODIFIER	-	lncRNA	INTRON=2/4,STRAND=1	-
sv_15891	9	10508463	10508578	115	DUP:TANDEM	GAACCGGGTGTCCTGCTTCATGTCTCTCTTACTAGACTCCAAGCTCCAGGACGGCAAGGACCCTGTCTGTTCTTGATCCACGCCGTATTTCTATGCCTGGCACACACTAGGTCGTC	GAACCGGGTGTCCTGCTTCATGTCTCTCTTACTAGACTCCAAGCTCCAGGACGGCAAGGACCCTGTCTGTTCTTGATCCACGCCGTATTTCTATGCCTGGCACACACTAGGTCGTCAACCGGGTGTCCTGCTTCATGTCTCTCTTACTAGACTCCAAGCTCCAGGACGGCAAGGACCCTGTCTGTTCTTGATCCACGCCGTATTTCTATGCCTGGCACACACTAGGTCGTC	ENSSSCG00000042864	upstream_gene_variant	MODIFIER	-	lncRNA	DISTANCE=136,STRAND=1	-
sv_15988	9	16289996	16290087	91	DEL	GTACAAGCTACTTTCAGTATCATAAAACCTACTGTGTCACAGGACATGAGTTAATATTAACCACATTAAAATGACTTGGTTCTCACAGAATT	G	ENSSSCG00000044327	intron_variant,non_coding_transcript_variant,feature_truncation	MODIFIER	-	lncRNA	INTRON=2/2,STRAND=-1	-
sv_16203	9	27052377	27052377	53	INS	T	TGTAGCATTAACAAGGACATTAATATAGGCAATATATTGCATCACAAAAATCCA	ENSSSCG00000047348	non_coding_transcript_exon_variant,feature_elongation	MODIFIER	-	lncRNA	EXON=3/3,STRAND=1	-
sv_16709	9	65486176	65486473	297	DEL	TCATTTTTTAATTTTGTTTTTGTTTTTTTTTTGTTGTTGTTGTTGTTGTTGTTGCTATTTCTTGGGCCACTCCCGTGCGTGGCATATGGAGGTTCCCAGGCTAGGGGTTGAATCGGAGCTGTAGCCACCGGCCTACGCCAGAGCCACAGCAACGCGGGATCCGAGCCGCGTCTGCAACCTACACCACAGCTCACGGCAACGCCGGATCGTTAACCCACTGAGCAAGGGCAGGGATCGAACCCGCAACCTCATGGTTCCTAGTCGGATTCGTTAACCACTGCGCCATGACGGGAACTCC	T	ENSSSCG00000046314	intron_variant,non_coding_transcript_variant,feature_truncation	MODIFIER	-	lncRNA	INTRON=1/3,STRAND=-1	-
sv_17860	10	11922410	11922599	189	DEL	TGAGGTTGAGGGTTCGATTCCTGGCCTTGCTCAGTGGGTTAAGGATCCGGTGTTGCCCTGAGCTGTGGTGTAGGTTGCAGACGAGGCTTGGATCTGGTATTGCTGTGGCTGTGGTGTAGGCCGGCAGCTGTAGTTCCAATTTGACCCCTAGGCTGGGAACCTGCATATGCCATGGGTGTGGCCCTAAAAA	T	ENSSSCG00000050257	intron_variant,non_coding_transcript_variant,feature_truncation	MODIFIER	-	lncRNA	INTRON=1/1,STRAND=-1	-
sv_18090	10	22974609	22974876	267	DEL	CCACAGCAATGCAGGATCCTTAACCCACTGAGAGAGGCCAGGGATAAAACCCAAATCTTCATGGATACTGGTTGGGTTTGTCACTGCTGAGCCGCAATGGGAACTCCCCACCTTTTTCTTTTTTTGTCTTTTTGCTATTTCTTTGGGCCGCTCCCATGGCATATGGAGGTTCCCAGGCTAGGGGTCCAATCGGAGCTGTAGCCGCCGGCCTACGCCAGAGCCACAGCAACGCAGGATCCGAGCTGCGTCTGCAACCTACGCCACAGCT	C	ENSSSCG00000045833	intron_variant,non_coding_transcript_variant,feature_truncation	MODIFIER	-	lncRNA	INTRON=1/2,STRAND=-1	-
sv_18167	10	28918151	28918791	640	DEL	TAAAAATAAAAGTATAGGAGATGCAATCCCACTCCTGGGCATCTATCCGGACAAAGCTCTACTTAAAAGAGACACATGCACCCGCATGTTCATTGCAGCACTATTCACAATAGCCAGGACATGGAAACAATCCAAATGTCCATCGACAGAGGATTGGATTCGGAAGATGTGGTATATATACACGATGGAATACTACTCAGCCATAAAAAAGGATGACATCATGCCATTTGCAGCAACATGGATGGAACTAGAGAATCTCATACTGAGTGAAATGAGCCAGAAAGACAAAGACAAATACCATATGATATCACTTATAACTGGAATCTAATATCCAGCACAAATGAACTTCTCCTCAGAAAAGAAAATCATGGACTTGGAGAAGAGACTTGTGGTTGCCTG…	T	ENSSSCG00000038150	intron_variant,non_coding_transcript_variant,feature_truncation	MODIFIER	-	lncRNA	INTRON=5/9,STRAND=-1	-
sv_18307	10	39921638	39921987	349	INV	TGTTGGCATAAGCTGTAGTGTAGGTTGCAGTCTTGGCTTGGATCTGGTGCTGTTGCGGCTGTGGTGCAGGCTGGTAGCCACATCTCTGATTTGACCCCTAGCCTGGGAACTTCCATATGCTGCAGCCCTAAAAAAACAAAAAAGGAAAAAAATGCAGGTTGATGTTTTCAAAACTGCTGCTAAGCTATGGATGAGAAAGTAGGGCTTTTTAAATTTTTTTTAAGGGCGTCACCTGTGGCATATGGAAGTTATATGTATAGGAGCAGAATTGGAGCTGCAGCTGCCAGTCTACACCACAGCAATGCTGGATCCAAGCCACATCTGTGAACTACACCACAGCTTGTGGCAATG	CATTGCCACAAGCTGTGGTGTAGTTCACAGATGTGGCTTGGATCCAGCATTGCTGTGGTGTAGACTGGCAGCTGCAGCTCCAATTCTGCTCCTATACATATAACTTCCATATGCCACAGGTGACGCCCTTAAAAAAAATTTAAAAAGCCCTACTTTCTCATCCATAGCTTAGCAGCAGTTTTGAAAACATCAACCTGCATTTTTTTCCTTTTTTGTTTTTTTAGGGCTGCAGCATATGGAAGTTCCCAGGCTAGGGGTCAAATCAGAGATGTGGCTACCAGCCTGCACCACAGCCGCAACAGCACCAGATCCAAGCCAAGACTGCAACCTACACTACAGCTTATGCCAACA	ENSSSCG00000044435	downstream_gene_variant	MODIFIER	-	lncRNA	DISTANCE=2890,STRAND=1	-
sv_18473	10	48346986	48347065	79	DEL	TAAAAAATATTATCTTGAAAAAAAATAATAAATAACTAAAATAAAATAAAGGTCAGAATCAGTAAAAAAAAAAAAAAAAA	T	ENSSSCG00000045782	upstream_gene_variant	MODIFIER	-	lncRNA	DISTANCE=1797,STRAND=-1	-
sv_18949	11	9777901	9777976	75	DEL	TTTCTCCCTTCAATTCTTCTGTTACTCTAAGTGTGATTAATAGGAGTGTTTTATTACATGTTTCTCTTCAGACTTC	T	ENSSSCG00000050453	non_coding_transcript_exon_variant,feature_truncation	MODIFIER	-	lncRNA	EXON=1/2,STRAND=1	-
sv_19276	11	26827936	26828057	121	DEL	ATACATTTATTCTTTTTTTTTTTTTTATTTTCCCACTGTACAGCAAGGGGGTCAGGTCATCCTTAGATGTATACATTGCAGTTACAGTTTTTTCCCCAACCTTTCTTCTGTTGCGACATGAG	A	ENSSSCG00000036916	intron_variant,non_coding_transcript_variant,feature_truncation	MODIFIER	-	lncRNA	INTRON=2/3,STRAND=1	-
sv_19954	11	71864168	71864474	306	DEL	GCTAAACTGATCTTTTTTTTTTTTTTTTTTTTTGTCTTTTTTGTTTTTTGCTGCTGTTGTTGTTGTTGCTATTTCTTGGGCCACTCCCGCGGCATATGGAGGTTCCCAGGCTAGGGGTTGAATCGGAGCTGTAGCCACCGGCCTACGCCAGAGCCACAGCAACGCGGGATCCGAGCCGCGTCTGCCACCTACACCACAGCTCACGGCAATGCCGGATCGTTAACCCACTGAGCAAGGGCAGGGACCGAACCCGCAACCTCATGGTTCCTAGTCGGATTCGTTAACCACTGCGCCACGACGGGACCTC	G	ENSSSCG00000043665	intron_variant,non_coding_transcript_variant,feature_truncation	MODIFIER	-	lncRNA	INTRON=2/3,STRAND=1	-
sv_21064	12	60964550	60965159	609	INV	CCCGGCAACCTCACTGGACCCCTGAGCCGGAGGAAGCTGCGTCCCAGTGAATTGATTCACAGGGAGGAAGAGGCGTGTGCGGGGCACTCACCTCCTCCCGCCTCGCACGCGCCCTCCCGGCCCCAGAGCAGCGGATCCACAGCCCAGAGACGTGTGGCAGGATGGGGAGGGCGTTTCTCCCTGGGGCGGTGGCACAGGGCAGGTAAGTGCGCCCGCCACCACCTTAGGGCTTTCCGCCAGAACCTGTGACCGTGGCTGCCTCAGGACTGGCTCTACATCAGGGCCGTGGCGGGTGGACGGCTGTGCCCTGCTTTTTCTCTCTTCTTCCCCAAGATATGTTTGGCAACTGCGTCTGAGGCCTCCAGCTGCACCTGGGCACAGCGTGTCCCCGTGGACACC…	CGCCTCTTCCAGCAGAATCTTGCAGGGAACCTCGGGGAAGCAGGAAAGCAGGGCCACGGAGCGGAGGTGCCAGCAGAGGCGGAGTCCCTCCCAGGCCCCGTGCTGTCTGGGGGCACCTGCTGGTCCGGGTGACGTAACTTGGCCGTGTCAAGGGAGGTTTCGTGTCAGCTGGTGCGGATCCGAGTTCACCCCATGCTTATCTGGCAACCTCTGGTGTCCACGGGGACACGCTGTGCCCAGGTGCAGCTGGAGGCCTCAGACGCAGTTGCCAAACATATCTTGGGGAAGAAGAGAGAAAAAGCAGGGCACAGCCGTCCACCCGCCACGGCCCTGATGTAGAGCCAGTCCTGAGGCAGCCACGGTCACAGGTTCTGGCGGAAAGCCCTAAGGTGGTGGCGG…	ENSSSCG00000043755	downstream_gene_variant	MODIFIER	-	lncRNA	DISTANCE=1149,STRAND=1	-
sv_23062	13	175063026	175063140	114	DUP:TANDEM	AAAAAAATAATGTATTTATTATTGAGGAAAAGGGAAAGGATAATTAATAGGAAATTAAATAACCAGATTTACCTAAAAAGATTTACATAAAACCAGTTTCTGTGGGAAGATGTAA	AAAAAAATAATGTATTTATTATTGAGGAAAAGGGAAAGGATAATTAATAGGAAATTAAATAACCAGATTTACCTAAAAAGATTTACATAAAACCAGTTTCTGTGGGAAGATGTAATAAAAAATAATGTATTTATTATTGAGGAAAAGGGAAAGGATAATTAATAGGAAATTAAATAACCAGATTTACCTAAAAAGATTTACATAAAACCAGTTTCTGTGGGAAGATGTAA	ENSSSCG00000046438	intron_variant,non_coding_transcript_variant	MODIFIER	-	lncRNA	INTRON=2/2,STRAND=1	-
sv_24522	14	81090147	81090203	56	DEL	GCTGTCTTCCTCACTTGCAGCCTGCTGCCCCACCCATCTGACTACCAGGACCCCCTC	G	ENSSSCG00000051431	intron_variant,non_coding_transcript_variant,feature_truncation	MODIFIER	-	lncRNA	INTRON=4/5,STRAND=-1	-
sv_25101	14	128863065	128863164	99	DEL	CCTCAGCGTCTCTCCTCTCCCTCTGGCCAGTCAACAGGAAGTTGGGGCATAGAACCCACGTAATCGGAGCTGCCCCATCCCTTCCCAAGAGTGACATGTG	C	ENSSSCG00000050286	intron_variant,non_coding_transcript_variant,feature_truncation	MODIFIER	-	lncRNA	INTRON=1/3,STRAND=-1	-
sv_25102	14	128865193	128865485	292	DEL	CAAAAGTCATTACTGGAGTTCCCGTCGTGGCGCAGTGGTTAACGAATCCGACTAGGAACCATGAGGTTGCGGGTTCGGTCCCTGCCCTTGCTCAGTGGGTTGGGGATCTGGCGTTGCCGTGAGCTGTGGTGTAGGTTGCAGACGCGGCTCGGATCCCGCGTTGCTGTGGCTCTGGCATAGGCCGGTGGCTATAGCTCCGATTGGACCCCTAACCTGGGAACTCCATATGCTGCGGGAGCAGCCCAAGAAATAGCAACAACAACAACAAAAGACAAAAGACAAAAAGAAAAAAA	C	ENSSSCG00000050286	intron_variant,non_coding_transcript_variant,feature_truncation	MODIFIER	-	lncRNA	INTRON=1/3,STRAND=-1	-
sv_25606	15	35473	35473	151	INS	C	CAATACACTGCATTCAATCGAGATTCATTTCCCCACGGTGCATGGAATCCACTGCATTCAATCAGGATCCATTGTGCCACACTGCATGG	ENSSSCG00000047217	upstream_gene_variant	MODIFIER	-	lncRNA	DISTANCE=4546,STRAND=1	-
sv_25719	15	6112472	6112535	63	DEL	CGTAACAATGTATATAAATAAGGCCTCTTATGACCTGACTCCTATCTCCACAAATGTCCTATTG	C	ENSSSCG00000037285	intron_variant,non_coding_transcript_variant,feature_truncation	MODIFIER	-	lncRNA	INTRON=2/3,STRAND=-1	-
sv_26375	15	60545762	60545891	129	DEL	GACAACTGATTTTTTTTTTATTATTTTCCCACTGTACAGCAAGGGGGTCAGGTCATCCTTAGATGTATACGTTGCAGTTACAGTTTTTTCCCCCACCCTTTCTTCTGTTGCGACATGAGTATCTAGACAT	G	ENSSSCG00000042894	intron_variant,non_coding_transcript_variant,feature_truncation	MODIFIER	-	lncRNA	INTRON=1/2,STRAND=1	-
sv_26787	15	107578428	107578528	100	DEL	AATAGCTGAAGAAGCAGAGAGGAAAAATTGTTGCAGTGGAAGGGGAATCATACCCAACACTCCCTTCAGGCCCCACTTCCCCAGGGACATGGTTCCTGCCG	A	ENSSSCG00000049146	intron_variant,non_coding_transcript_variant,feature_truncation	MODIFIER	-	lncRNA	INTRON=1/3,STRAND=-1	-
sv_28178	16	31999456	31999750	294	DEL	GCCTGAAGCAACTATTTTTTTTTTTTTTTGTCTTTTGTCTTTTGTTGTTGTTGTTGCTACTTCTTGGGCCGCTCCCGCAGCATATGGAGGTTCCCAGGCTAGGGGTTGAATCGGAGCTGTAGCCACCAGCCTACGCCAGAGCCACAGCAACGCGGGATCCGAGCCGCGTCTGCAACCTACACCACAGCTCACGGCAACGCCGGATCGTTAACCCACTGAGCAAGGGCAGGGACCGAACCCGCAACCTCATGGTTCCTAGTCGGATTCGTTAACCACTGCGCCACGACGGGAACTC	G	ENSSSCG00000042562	non_coding_transcript_exon_variant,feature_truncation	MODIFIER	-	lncRNA	EXON=2/2,STRAND=-1	-
sv_28378	16	54407316	54407589	273	DEL	TTCTTCTTCATTTTTTTTTTTTTCTGTCTTTTTGCTATTTCTTAAGCCGCTCCCTCGGCATATGGAGATTCCCAGGCTAGGGGTCTAATCGGAGCCGTAGCCACCGGCCTACGCCAGAGCCACAGCAACGCTGGATCCGAGCCGCGTCTGCAACCTACACCACAGCTCACAGCAACGCCGGATCCTTAACCCACTGAGCAAGGGCAGGGACCGAACCCGCAACCTCATGGTTCCTAGTCAGATTCGTTAACCACTGCGCCACGACGGGAACTCC	T	ENSSSCG00000041925	intron_variant,non_coding_transcript_variant,feature_truncation	MODIFIER	-	lncRNA	INTRON=1/2,STRAND=1	-
sv_29770	18	2854546	2854826	280	DEL	GCTGAGGGAGCTCCCGTCGTGGCGCAGTGGTTAACGAATCCAACTAGGAACCATGAGGTTGCGGGTTCGGTCCCTGCTCTTGCTCAGCGGGTTAAGGATCTGGCGTTGCCCTGAGCTGTGGTGTAGGTCGCAGACGCGGCTCGGATCCCGCATTGCTGTGGCTCTGGCGTAGGCCGGTGGCTACAGCTCTGATTGGACCCCTAGCCTGGGAACCTCCATATGCCGCCGGAGCGGCCCAAGAAATAGCAACAACAAAAGACAAAAAAAAAAAAAAAAGGGGC	G	ENSSSCG00000049721	upstream_gene_variant	MODIFIER	-	lncRNA	DISTANCE=3317,STRAND=-1	-
sv_29804	18	4434301	4434903	602	DEL	TAACGAATCCGACTAGGGACCATGAGGTTGCGGGTTCAGTCCCTGGTCTTGCTCCGTGGGTTAAGGATCCGGCGTTGCCGTGAGCTGTGGTGTGGGTTGCAGATGCAGCTCGGATCCTGCGTTGCTGTGGCTCTGGCGTAGGCCGGTGGCTACAGCTCCGATTCAACCCCTAGCCTGGGAACCTCCATATGCCGCAGGAGCGGCCCAAGAAATAGCAAAAAGACAAAAAAAAAAAAAAAAAAAAAAAAAAAAGAAAGAAATCAACAACAAGCACAGACCTAAAATGGACTCCCTTAAATAACACGAGATAATGTGATTCACATCGGAAGCTATGAAATATTTAGACCCGGATGACAAGAAGTGTACTGCAGCAGAGTCACTTACTGTCAGCCCCCCACA…	T	ENSSSCG00000042794	intron_variant,non_coding_transcript_variant,feature_truncation	MODIFIER	-	lncRNA	INTRON=7/7,STRAND=-1	-
sv_30182	18	30183377	30183471	94	DEL	GTCTTTCTTTCTGTCTGTCTGTCTGTCTGTCTTTCTTTCTGTCTGTCTGTCTGTCTGTCTTTCTTTCTTTCTCTTTCTTTCTTTCTTTCTTTCTT	G	ENSSSCG00000040829	upstream_gene_variant	MODIFIER	-	lncRNA	DISTANCE=14,STRAND=1	-
sv_30215	18	33025284	33025606	322	DEL	ACTACTTTTTTTATTTTATTTTATTTTTTATTTATTTATTTATTTTTTTGTCTTTTGTCTTTGTTGTTGTTGTTGTTATTGTTGCTATTTCTTGGGCCGCTCCCGCGGCATATGGAGGTTCCCAGGCTAGGGGTTGAATCGGAGCTGTAGCCACTGGCCTACACCAGGGCCACAGCAACGCGGGATCCGAGCCGTGTCTGCAACCTACACCACAGCTCACGGCAACGCCAGATCGTTAACCCACTGAGCACGGGCAGGGATCGAACCCGCAACCTCATGGTTCCTAGTCGGATTCGTTAACCACTGCGCCAAGACGGGAACTC	A	ENSSSCG00000045786	intron_variant,non_coding_transcript_variant,feature_truncation	MODIFIER	-	lncRNA	INTRON=1/1,STRAND=-1	-
sv_00191	1	12268240	12268461	221	DEL	GCCACCGCCACCCTCGGATGGGGTCTCAGAAAAATACCTCAGAGTGGGGACACCTCCTGAGGTGCAGCCTCAGCTTCTGCGAGAGAACAAAGCTGAGTCAGCCTGGGGCCTGTGAGGCCCAGCAAGGTGACCTGTGGCACCCAGGGGCGGGGAAGGGGCCCCAGGGGAGCCCACGTTGGGTGGAGTCAGCTGGGGTGGACTGGGACTGGGAGCATAATTATA	G	-	intergenic_variant	MODIFIER	-	-	-	-
sv_00274	1	15965188	15965697	509	DEL	TATCCTTAACCCACTGAGCAAGACCAGGGATCAAACCCACAACCTCATGGTTCCAAGCGGATTCGTTAACCTCTGAGCCACAGCAGGAACCCAACCAACTCTATTTCTAAATAAGGTCACATTCTGACATACTGGGGGTCAGGACTTCAACATATGTTTTGGAAAGAACACAATTCAACCCATACCAATCCAGTCTTGAATTACCATAAGGACCACTATGAACTAGAATATTTAGCAAACCACACTAACATAATACACTTGCAGAAATATTCCATTTGGAGGGTTTAAGTTCTGAAAGCATTTGCTTCAGTTAATGCTGCAGGAGCCTGATATTTCTTTTATGTTTTATTTTTATTCTTTTACTTTTTGGGGCCACACCTGTGGCAAATGGAGGTTCCC…	T	-	intergenic_variant	MODIFIER	-	-	-	-
sv_00504	1	29526383	29527137	754	DEL	AAAATATTATGTAAGCCCTAATTGGTGTAAGGCACAATTCTGAGCTTTCAGATTCCAAGATGAATGAAATCCTGGGCAAGACATGAGTTATTTTAAAATCTAGGAAGGAAGATAAGATATATATAAAAATAATTACAGGATTTTCTTGTGGTGCAGCAGGTTAAGGATCTGGCATTGTCATTGCAGTGGCTTAGGTGGCTGCTGTGGCAGGGGTTCTATCTCTGGCCTGGGAACTTCCGCATGCTATAGACACAGACAATTTTTTTTTTCCTACTGTAAGGGTTTTTTGTTGTTGTTGTTGTTGTTGTTGTTGTCATTGTTGTTGTTGTTGTTGCTATTTCTTGGGCCGCTCCCGCGGCATATGGAGGTTCCCAGGCTAGGGATCCAATCGGAGCTGTA…	A	-	intergenic_variant	MODIFIER	-	-	-	-
sv_00511	1	29788390	29788669	279	DEL	CAAAAAGAATGATGAGGGAGTTCCCGTCGTGGCGCAGTGGTTAACGAATCCAACTAGGAACCATGAGGTTGCGGGTTCGGTCCCTGCCCTTGCTCAGTGGGTTAAGGATCCGGCGTCGCCATGAGCTGTGGTGTAGGTTGCAGACGTGGCTCAGATCCCGAGTGGCTGTGGCTCTGGCGTAGGCCGGTGGCTACAGCTCCAATTCAACCCCTAGCCTGGGAACCTCCATATGCCGCGGGAGCGGCCCAAGAAATAGCAAAAAGACAAAAAAAAAAAAAAA	C	-	intergenic_variant	MODIFIER	-	-	-	-
sv_00600	1	35658261	35658505	244	DEL	TTTATGAAGATTCCTCCAAAACCTGCAGTCAATTTTCCTCGTGTGTTAGAAAGGGCTAAACTTCTGATGTTCTTTGGTTGCCCAGATCTATCTGAATGTTTCAGCAGATATTAGAAACATACAAGTTAGGGGGAAAAAAAGAATTATAGCATATGACTTCCTATGGCTACCCTTTTCTTTTCCAAACATATTATTGGGGTACAAAGAAAAGGGTGTCAGGATTTTTTTACTTTTCCTATATTGTG	T	-	intergenic_variant	MODIFIER	-	-	-	-
sv_00713	1	43639843	43640180	337	DEL	ACGGCATATGGAGATTCCCAGGCTAGGGGTTGAATCGGAGCTGTAGCCACCAGCCTACACCACACCCACAGCAATGCCAGATCTGAGCCATGTCTGTGACCTACACCACAGCTCACAGCAACGCCGGATCCTTAACCCACTGAGCAAGGCCAGGGATCGAACCTGCAACCTCATGGTTCCTACTCGGATTTGTTAACCACTGAGCCCCAACGGGAACTCATCAACAGAGGTTTTTCATGTTCAATGCCCTGTTTTACAAAATAGAAAGATCTTTATGTCTCTATTTTGCCATCCCTGCTTTTATTTTTTGCTTTTTTTTTTTTTTAGGACCCCACCCG	A	-	intergenic_variant	MODIFIER	-	-	-	-
sv_00766	1	47598082	47598308	226	DEL	TATAGTCTTTTTTCTATAAATACAAAAATTCTTAAACAGAGACATAAAAATTAGATCCTAATTGACAATGGAGAATAGAATTACAGCTGAATAAAATGGAAAATACGTTTGCAAATTTTTTTTTGGATGTGCCCGTGGTATGTGGAAGTTCCCACTCCAGGAATCTAACCCATGCCATAGCAGCGACCTGAACCACTGCAGTGACAATGCAGGATCCTTAACCCTGC	T	-	intergenic_variant	MODIFIER	-	-	-	-
sv_00845	1	53930870	53931008	138	DUP:TANDEM	GATTTGGAGAAAGGGACATTGGGAAACACAAGAGAAACCTGGATCCCAGTTCAACTCACAGAGTCTAATGACATCAATTATAGAGAAGCAAATGCTGAGAAACAAGAGTTTCTGGAGGAGTGCACTCAGTGGGTTCAAC	GATTTGGAGAAAGGGACATTGGGAAACACAAGAGAAACCTGGATCCCAGTTCAACTCACAGAGTCTAATGACATCAATTATAGAGAAGCAAATGCTGAGAAACAAGAGTTTCTGGAGGAGTGCACTCAGTGGGTTCAACAAATTTTACCAATTTGGAGAAAGGGACATTGGGAAACACAAGAGAAACCTGGATCCCAGTTCAACTCACAGAGTCTAATGACATCAATTATAGAGAAGCAAATGCTGAGAAACAAGAGTTTCTGGAGGAGTGCACTCAGTGGGTTCAAC	-	intergenic_variant	MODIFIER	-	-	-	-
sv_00922	1	60144859	60145022	163	DEL	TGTTGAAGAACATGCCTTCCCTGTGATGAACCTGAATAGCCAAAACAGAATGAATGCAATGCTTGTGCTTGAAACAGCGGTCAAATAACATAAGGCCAGAAAATGTTTATTAAATTTAGAGAGATGAACATCAGTGATTTTTGCTGGAGAAGCTATACTGGAAA	T	-	intergenic_variant	MODIFIER	-	-	-	-
sv_00935	1	61591108	61591160	52	DEL	GGGGACAAAAGGCGATGTCTTTAAAACTTTTTTTTTTTTAAGTATCCATACTT	G	-	intergenic_variant	MODIFIER	-	-	-	-
sv_00979	1	66886773	66886773	103	INS	A	ATTTCTCACTAAATGGATTGACATATTGTACACTTTATTGGGAAGCTGTCACACAAATGTTTTTTTGTGTTTTTTGGTCTTTTTGCTATTTCTTGGGCCACTCG	-	intergenic_variant	MODIFIER	-	-	-	-
sv_00995	1	68041083	68041396	313	DEL	TAAAAAAAATTCACGGAGTTCCCGTCGTGGCGCAATGGTTAACGAATCCGACTAGAAACCATGAGGTTGCGGGTTCGGTCCCTGCCCTTGCTCAGTGGGTTAACGATCCGGCGTTGCCGTGAGCTGTGGTGTAGGTTGCAGATGCGGCTCGGATCCCGCGTTGCTGTGGCTCTGGCATAGGCTGGCGGCTACAGCTCGGATTCGACCCCTAGCCTGGGAACCTCCATATGCCGTGGGAGCGGCCCAAGAACTAGCAACAACAACAACAACAACAAAAAAAAAAGACAAAAGACGAAAGACAAAAAAAAAAAAAA	T	-	intergenic_variant	MODIFIER	-	-	-	-
sv_01002	1	69119683	69119683	78	INS	A	ACACTTTCATCATGTTCTTTCCAAACTTTTCAAATACAAGTCTCCCCATCTTTCAAATCTATAGCTCCTCAGTTCCTTT	-	intergenic_variant	MODIFIER	-	-	-	-
sv_01137	1	83699601	83700436	835	DEL	CACAGCTCAGATCTGGCGTTGCTGTGGCTGTGGCATAGGCCAACAGCTGTAGCTCCGATTAGACCCCTAGCCTGGGAACCTCCATATGCCATGGCACAGCCTTAAAAAGACAAAAGTTTATTGTTTGATTCACTCTATAATTTAAAATTTATAAATCACATAAAAATAGTATTTATTATACCAATATTCACTGAACAGAAATTTCAGAAGACCTCTTTATATAAATTACCTGAACATTAAAAATACAAAAGTAGGAGTTCCTGCTGTGGCACAGTAGGTTAGTGATTCAGCATTGTCTATGCAGTGGTGTGGACTTGATCCCCAGCCTAGAGCAGTGGGTTAAGGATCCAGTATTGCTATAGTTGTGGTGTATGTCATGGTGTAGATCACAGCTGCAGC…	C	-	intergenic_variant	MODIFIER	-	-	-	-
sv_01184	1	88837020	88837074	54	DEL	TGACACTGAGTAAAACACTGCTTTAAGTGTTTTACATGTATTAAATTAAATTCTC	T	-	intergenic_variant	MODIFIER	-	-	-	-
sv_01358	1	106597979	106597979	106	INS	A	ATTCTCATAAGGGTTACAGAGGTAAGTATGTGATGGTGAGTAGCTGAAAATAATAGCAGCTAGAGTTCATTGAGCACAAAACCTTGTGCCAGGCACAGACTTCTTGG	-	intergenic_variant	MODIFIER	-	-	-	-
sv_01477	1	117059856	117060145	289	DEL	TCTGGGCTCTCTATTCTTTTTTTTTTTTTTTGTCTTTTGTTGTTGTTGTTGCTATTTCTTGGGCCGCTCCCGCGGCATATGGAGGTTCCCAGGCCAGGGGTCCAATCGGAGCTGTAGCCACCGGCCTACGCCAGAGCCACAGCAACGCGGGATCCGAGCCGCGTCTGCGACCCACACCACAGCTTACGGCAACGCCGGATCGTTAACCCACTGAGCAAGGGCAGGGACCGAACCCGCAACCCCATGGTTCCTAGTCGGACTCGTTAACCACTGCGCCACGACGGGAACTC	T	-	intergenic_variant	MODIFIER	-	-	-	-
sv_01656	1	137031111	137031111	76	INS	C	CACTGTATCATCTGTTCCCACCAGAAATACTCTATATATTAAAAACTTTAAGCCATTTCAGCTGAGAGGACTTAAAG	-	intergenic_variant	MODIFIER	-	-	-	-
sv_01711	1	146731414	146731513	99	DEL	TCAGGAATGTAGTTAGATTGTCTGAGATTACCAGCTATTGATCTCACACTTGGGCAGATGATAGAAAATACAGCATCACTACAGAGAAACTACGAGAATA	T	-	intergenic_variant	MODIFIER	-	-	-	-
sv_01815	1	157725172	157725701	529	DEL	CGGATCCTCAACCCACTGAGCAAGGCCAGGGATTGAACCCGCAACCTCATGAATCCTAGTCGGATTCGTTAACCACTGAGCCACGACGGGAACTGTATTTTATTTTAAATTGTCTTCACCTTATAAAGCAAAATTTAAACATTTGCTATTTCAAATACAAAAGTAACCCATTAGATAGTAAATAATGTAATGGACCTCACTAGACAAAGTGCTGGGGCCTGAAAAATTCATGATTTTTAATTTGGGGTAGATAATTTGCTTCTTATACATTTCTTTATCTTATTATTTTTTCTTTTATGTGTGTGTGTATATATATGTTTGTGTGTGTGTGTGTGTGTGTGTGTATATGTGTGTGTGTGTGTGTGTATATATATATATATATATTTGCTTCTTAGGGCC…	C	-	intergenic_variant	MODIFIER	-	-	-	-
sv_01968	1	174238281	174238386	105	DEL	CTATCTGTATGTTGTAGGGAGTTTAAATTACTTTCAGTATTGCTCAATCTGTCTTCCAACAACTCCCATGAAAGCTAGTTCCACTTTGAAGGAAAGATACTTGAGT	C	-	intergenic_variant	MODIFIER	-	-	-	-
sv_02144	1	195344929	195345776	847	DEL	GTGCTCCACCCCCAAAAAGATTATAACATGCTGAAGACTCAGACAATGATTAGCATTTTTAGTAATAAAATCTTTAAAAAATAAAGTATATAATTTTTAGAGATAATTCTATTTCACACTTAGTAGACAAGAGTCTATTTTAAACATAACTTTTATATACACTGGGAAACCAAAAAATTCATGTCACTCACTTTATTATAATATTTTGTTTATTACAGTAGTATGAAACCTAACTAGCACTATCTCCAAGGTATGCCTATAGAGTCACATTCTGAGATACTTGTGATTAGGACTTCAACATAAAGTTTTGGGAATATACAATCAGTCTAAATATCCATTAACCTTTTTCTCCTTTTCCCTCAAAACGCGCACACACACACACACACACACACACACACA…	G	-	intergenic_variant	MODIFIER	-	-	-	-
sv_02237	1	206408791	206408890	99	DEL	ATATATATATTTATATATATATATATATATAATATATATATATAAATATATATATATATAAATATATATATATAAATATATATATATATATAAATATATT	A	-	intergenic_variant	MODIFIER	-	-	-	-
sv_02544	1	240058976	240059056	80	DEL	AATCCATCCCTCCCTCTCCCAACCTTCCCCTTTGGTAACCATACTTTTTTTTTTTTTTTTAAATGGCCACACCTGGGGGAT	A	-	intergenic_variant	MODIFIER	-	-	-	-
sv_02545	1	240071337	240071451	114	DEL	TCCTTTCTTTCCTTTCTTTCCTTTCTTTCCTTTCTTTCCTTTCTTTCTTTCTTTCTTTCTTTCTTTCTTTCTTTCTTTCTTTCTTTCTTTCTTTCTTTCTTTCTTTCTTTCTTTC	T	-	intergenic_variant	MODIFIER	-	-	-	-
sv_02768	1	254333921	254334138	217	DEL	TCGCCGCAATGCCAGATCCTTAACCCACTGAGCGAGGCCAGGGATCGAACCTACAACCTCATGGTTCCTAGTCGGATTCTTTAACCACTGAGCCATGACGGGAACTCCAGAAACTATTATTAACACTGGTTAACAGATGAGCAAACTGAGGTTCAGAGAAGTTAAGTAATTTGCTTAGACTCTTACTGCTAGTAAGTGGTAGAACCTGAGTTTGAACC	T	-	intergenic_variant	MODIFIER	-	-	-	-
sv_02822	1	259281146	259281200	54	DEL	AAGTGTTTAATTAATTATAGAGGTGTCCTTTTCTCAATTCCAAAAGACTTCTCCT	A	-	intergenic_variant	MODIFIER	-	-	-	-
sv_03074	2	680546	680641	95	DEL	CGACCCGTGGGAAGGGGACAGCTCCATCCCTGGCGCTAGGGATCAACAGGGAGGGTCTTTGCTTCTTTGCTTTTTGAGCCCCCGCGCCCTTCGCAG	C	-	intergenic_variant	MODIFIER	-	-	-	-
sv_03080	2	1335043	1335128	85	DEL	AAAATACTTCCCGGGGGAAGTATTTTGGTCCTCACCAAATATCAAAATACTTCCCGGGGGAAGTATTTCGGTCCTCACCAAATATC	A	-	intergenic_variant	MODIFIER	-	-	-	-
sv_03104	2	3468806	3469750	944	DEL	TCCCAGTTTGTGTTTTCAAATCACCCCCTTCATCTGCTTGCTGGACGTTGCTGTGGGATGGTCTCACCATGAAGAACATGAGAGATCAGGCCATCCAGCTTCAAACCAGGGTGGGTGCCCTGGGCTCCTGAGCCTGGCTCTGCTTCAGGCTCCTTCTCTGCCAAGGGGGCGTCATGATCAAACAGACCCATCAGTTGTTGAAGGATGAAATGAGACGATCAAGGAAGAGAGTTTGGGGCCGTCTCGGACCCCCTCGCTTCTCCCGAGACAGTGGTCGGCTGAGCTCCCCAGCGATGCGGTAACCTGTGCTTGGCCGGAGGCGGAGAGCCAGCGGCTCTACCTGCTGACTCTGGGGTCGCACCATCAGCTTCTGATCCTTTCGCTTCCCTTCCATGGCCA…	T	-	intergenic_variant	MODIFIER	-	-	-	-
sv_03128	2	5365963	5365963	92	INS	G	GCAACGCCGGATCCTTAACCCACTGAGCGAGGCCAGGGATCGAAGCCGCAACCTCATGGTTCCCAGTCAGATTCATTAAACACTGCGCCACGA	-	intergenic_variant	MODIFIER	-	-	-	-
sv_03194	2	8726356	8726642	286	DEL	TTAAAGTGTAGTTCGGAGTTCCCGTCGTGGCGCAGTGGTTAACGCATCCGACGAGGAACCATGAGGTTGCGGGTTCGATCCCCGCCCTTGCTCGGTGGGTTAACGATCCGGCGTTGCCGTGAGCTGTGGTTTAGGTTGCAGACGCGGCTCGGATCACGCGTTGCTGTGGCTCTGGCGTAAGCCGGTGGCTACAGCTCCGATTCGACCCCTAGCCTGGGAACCTCCATATGCCGCGGGAGCGGCCCAAGAAATGGCAAAAAGACAAAAAAAATAAATAAATAAATAAA	T	-	intergenic_variant	MODIFIER	-	-	-	-
sv_03272	2	13106895	13106989	94	DUP:TANDEM	GTGTAGGTCGCAGACATGGCTCGGACCCCGAGTTGCTATGGCTCTGGCGTAGAATGGTGGCTACAGCTCTGATTAGACCCCTAGCCTGGGGAACT	GTGTAGGTCGCAGACATGGCTCGGACCCCGAGTTGCTATGGCTCTGGCGTAGAATGGTGGCTACAGCTCTGATTAGACCCCTAGCCTGGGGAACTTGTAGGTCGCAGACATGGCTCGGACCCCGAGTTGCTATGGCTCTGGCGTAGAATGGTGGCTACAGCTCTGATTAGACCCCTAGCCTGGGGAACT	-	intergenic_variant	MODIFIER	-	-	-	-
sv_03365	2	20222787	20223083	296	DEL	TCATCTCTCTCTCTTGTTTTTTTTTTTGTCTTTTGTCTTTTGTTGTTGTTGTTGTTGCTATTTCTTGGGCCGCTCCCGCGGCATATGGAGGTTCCCAGGCTAGGGGTTGAATCGGAGCTGTAGCCACCGGCCTATGCCAGAGCCACAGCAACACGGGATCCGAGCCACGTCTGCAACCTACACCACAGCTCACGGCAATGCCAGATCGTTAACCCACTGAGCAAGGGCAGGGACCGAACCCGCAACCTCATGGTTCCTAGTCGGATTCGTTAACCACTGCGCCACGACGGGAACTCC	T	-	intergenic_variant	MODIFIER	-	-	-	-
sv_03498	2	26904128	26904128	61	INS	G	GCACTTGTCACAATGCTTGCTATCCATTGAATCATTTTTACTTGCCTCTGTCACCAATACCA	-	intergenic_variant	MODIFIER	-	-	-	-
sv_03728	2	44153527	44153684	157	DUP:TANDEM	TGCTGACTCACAGATATTGAAAACTTATGGTCTCCAGAGGTGACAGTTTGGGGGATGGGGGGAAGTGCTTGGGTTGTGGGATGGAAATCCTGTAAAATTGGATTGTGATGATCATTATACAACTACAGATGTGATAAATTCATTGAGGGAAAAAAAAA	TGCTGACTCACAGATATTGAAAACTTATGGTCTCCAGAGGTGACAGTTTGGGGGATGGGGGGAAGTGCTTGGGTTGTGGGATGGAAATCCTGTAAAATTGGATTGTGATGATCATTATACAACTACAGATGTGATAAATTCATTGAGGGAAAAAAAAAGCTGACTCACAGATATTGAAAACTTATGGTCTCCAGAGGTGACAGTTTGGGGGATGGGGGGAAGTGCTTGGGTTGTGGGATGGAAATCCTGTAAAATTGGATTGTGATGATCATTATACAACTACAGATGTGATAAATTCATTGAGGGAAAAAAAAA	-	intergenic_variant	MODIFIER	-	-	-	-
sv_03813	2	50579960	50580296	336	DEL	GGTGAAACTCTCCTCAGGGAACAAACCACAGCCCCAAGGCATCTTTGCTCAGGAAAGCAACGCTTGCCTTTTTCTCCCCTATCCCACTCTTCTCAAATAGGGCAAAGAGGGTCAGGGCTGCCTCTTGCTCCCTGGGCACTGCTGGATTGCTCGTGGTCTCCTGAGCTGGAAACCCACTCCAAACGTGTTCTCCTTCGTGGAGAAGCAGGATTTGCCATGAAAAGGCCTTCTTTGCACACGCCCAAGCAATCCAGCCTTCGCCAGATAGGGATATTGGCACATAGGGCCCATCTCAGAAAAGGCACAAAACTAGCTTCTGGGAGTGGCATTCTGGAAA	G	-	intergenic_variant	MODIFIER	-	-	-	-
sv_03862	2	54800515	54800836	321	DEL	TAAAAGTGGGTATAGAGGAGTTCCCGTCGTGGCACAGTGGTTAACCAATCCGACTAGGAACCATGAGGTTGCGGGTTCGGTCCCTGCCCTTGCTCAGTGGGTTAACCATCCGGCGTTGCCGTGAGCTGTGGTGTAGGTCACAGACGCGGCTCGGATCCTGCGTTGCTGTGCCTCTGGCGTAGGCTGGCAGCTACAGCTCCGATTAGACCCCTAGCCTGGGAACCTCCATATGCCGCGGGAGCGGCCCAAGAAATAGCAACAACAACAACAACAAAAGACAAAAAAAGACAAAAGACAAAAAAAAAAAAAAAAAAAAAAAAAA	T	-	intergenic_variant	MODIFIER	-	-	-	-
sv_04124	2	88654615	88654677	62	DEL	TAGCTCATGGGCTAAGCTCTGTGCTGGGTACCAAGAAATAAAGCAAAATCCTTGTTCTCATAG	T	-	intergenic_variant	MODIFIER	-	-	-	-
sv_04129	2	88831306	88831396	90	DEL	GTATATATATATATATATGTGTGTGTGTGTGTGTGTGTGTATATATATGTGTGTGTGTATATATATATATGTGTGTGTGTGTGTGTATATA	G	-	intergenic_variant	MODIFIER	-	-	-	-
sv_04204	2	96769651	96770563	912	DEL	TATTGAGAGTTCTCTTATGGTACAGTGGGTTAAGGATCTGGTGCTGTCACTGTAGCAGCTCCAGTAAGCTGCTGTGACTCAGGTTCAGTTTTTGTCCTGGGAACTGCCACAGGTGCTGAAAAAAAAATTAGTAATTTTGTTGAGTGACTTCTGGACAATGCTCTTTATGGTCCTGTTAGGAACAGTTTATTTCAGTGTGGTCACCTATCTGAAAGTGTACTTCAGTGACAAAATCTTTCTTTTGTCTTCACATAGTATTTGAGGAGACATCTGCCCATTTCCTGCTACATTTGTAAACCAATTGAGAAATAATACAAGGAGAAAGATGGAGATAGCATCTAAAATATCATCCTGACAAAAGGTCTTCATGGATGAATTGGGTTATATCTGTATTCTAGT…	T	-	intergenic_variant	MODIFIER	-	-	-	-
sv_04208	2	97534354	97534697	343	DEL	AAGGCCAGGGATCGAACCCGCAACCTCATGGTTGCTAGTCGAATTCGTTAACCACTGCGCCACGACGGGAACTCCCAAGAATAAATAATTTAAAGTAATTGCCTCTAGAGAAGGAATTAGAAGAAGAGAAAAATGAATCAAGAACCAGGTGTTTCCTTTTTGGTTTTTTTGTTTTGTTCTGTTCTGTTTCAGTCTTTTTAGTGCCGCACTCACGGCCTATGGAAGTTCCCAGTCTGGGGTCGAACTGGAGCTGTAGCTGCTAGCCTACACCACAGCCACAGCAACGCCAGATCTGAGCGGCAGTTGTGACCTACTGCAATACAGGATCCTTAACCCACTGAGTC	A	-	intergenic_variant	MODIFIER	-	-	-	-
sv_04223	2	98504835	98505739	904	DEL	TACCGTGAGCTGTGGTGTTGGTCACAGACACAGCTCGGATCCCGAGTTGCTATGGTTGTGGCTGTGGCTTGCAGCTGTAGCTCCGATTTGACTCCTGGCCTGGGAATTCCACATGCTGCAAGTGTGGCCATAAAAAAGCCCCAAAAAAGAGAAAAGGAATAGTTTGCATCAACTAATCCCAACTCCCAGTCCATTCTGCTCCCCTCCCTCCGCAACCACATATCTGTTCTCCATGTCTGTGAGTCTCTTTCTTTTCTGTAGATAGGTTCTTTTGTGCCATATTTCAGATTCTACATATAAGTGATATCATATGGTATTTGTCCTTCTTTTTCTGATTTACTTCATTTAATATGAGAATCCATAATATCATCCATGTGGCCACAAATGGCATTATTTCAT…	T	-	intergenic_variant	MODIFIER	-	-	-	-
sv_04229	2	99228844	99228980	136	DUP:TANDEM	ATAGGAGTTCCCCTGTGGCATAGTGTGCTAAGGATCTGGTGTTGTCACTGTAGAAGTCTTGAATTGCTACTGTGGAGCAGATTTGATCCCTGGCCTGGGGAACTTCCTCATGCCTCAGGTATGGCAAAAAAAAAAAA	ATAGGAGTTCCCCTGTGGCATAGTGTGCTAAGGATCTGGTGTTGTCACTGTAGAAGTCTTGAATTGCTACTGTGGAGCAGATTTGATCCCTGGCCTGGGGAACTTCCTCATGCCTCAGGTATGGCAAAAAAAAAAAATAGGAGTTCCCCTGTGGCATAGTGTGCTAAGGATCTGGTGTTGTCACTGTAGAAGTCTTGAATTGCTACTGTGGAGCAGATTTGATCCCTGGCCTGGGGAACTTCCTCATGCCTCAGGTATGGCAAAAAAAAAAAA	-	intergenic_variant	MODIFIER	-	-	-	-
sv_04272	2	104131678	104131678	55	INS	T	TAACTTATTTTAGAATCAGTGAAGAGAGTAGCCAGGCAAATCTCATTCATCACCAA	-	intergenic_variant	MODIFIER	-	-	-	-
sv_04449	2	119159773	119159954	181	DUP:TANDEM	TTTATTTATTTATTTATTTATTTATACTTTGATGACTTTATTCTCAAGAGAGTGCTCACCCCTAAAAGTCTAGTTTCCATCCTTCACCATACAGTTGATCCTCTTTATCCATTTTGTCTTCCCTCCACACCCCTTCTCCTTTGGTAACCACCAATCTGTTCTCTGTATCTATTTGCGTGTGC	TTTATTTATTTATTTATTTATTTATACTTTGATGACTTTATTCTCAAGAGAGTGCTCACCCCTAAAAGTCTAGTTTCCATCCTTCACCATACAGTTGATCCTCTTTATCCATTTTGTCTTCCCTCCACACCCCTTCTCCTTTGGTAACCACCAATCTGTTCTCTGTATCTATTTGCGTGTGCTTATTTATTTATTTATTTATTTATACTTTGATGACTTTATTCTCAAGAGAGTGCTCACCCCTAAAAGTCTAGTTTCCATCCTTCACCATACAGTTGATCCTCTTTATCCATTTTGTCTTCCCTCCACACCCCTTCTCCTTTGGTAACCACCAATCTGTTCTCTGTATCTATTTGCGTGTGC	-	intergenic_variant	MODIFIER	-	-	-	-
sv_04584	2	127533374	127533374	98	INS	A	ACCAACTATGTTCTTTTCACCATCATCCCACACCCTTAGTATCCATTCCCACACATATTCTCCAGATTTCTGTCTATATAAATTGGAAACTCATGTGGT	-	intergenic_variant	MODIFIER	-	-	-	-
sv_04776	2	138081651	138081961	310	DEL	GATTTTTTTTTTTTTTTTTTTGTCTTTTGTCTTTTTGTTGTTGTTGTTGTTGTTGTTTTGTTGCTACTTCTTGGGCCGCTCCTTCGGCATATGGAGGTTCCCAGGCTAGGGGTTGAATCGGAGCTGTAGCCACCGGCCTACGCCAGAGCCACAGCAACGCGGGATCCGAGCCGTGTCTGCAACCTTCACCACAGCTCACGGCAACGCCGGATCGTTAACCCACTGAGCAAGGGCAGGGACTGAACCCGCGACCTCATGGTTCCTAGTCGGATTCGTTAACCACTGCGCCACGACGGGAACTCCTCACTTCT	G	-	intergenic_variant	MODIFIER	-	-	-	-
sv_04901	2	145622546	145623128	582	DEL	TGTTCATGAATCATGCTTGCTTTCCTCAAAAGCATTCTAGACAGAAGCAACTCCCAAATCAGGAGAGCAAGGAAGGTATTTACAAGGACAAAACAGACAAAGACAAAGCAGGCAGTGGACACTAGAGTTACAGAGTAGAGACAGGGGCCCAAAGAAAAAGGGAAGCTGCAATTCCTTCCTCTACTCTCCCTAAAGTATCTTTTGCATAACATTCTCAGGTTGGTTTCCTAAGAAGCATTATTACAAATTGGCACACCATAAAGAGGTACAGAATCAACCAGCTTTTGCCTTGTTCCAAATCCATGCTCAGGATGCACAGTGCACTTTTGGAAAACCAGAAAATGGGCCTATTCTTGACAGAAACATGAATAGTAACACGGACCATTCTTGAATCACCAT…	T	-	intergenic_variant	MODIFIER	-	-	-	-
sv_04918	2	146691900	146691953	53	DEL	CGCAGTAGTGTTGAGGTGAGGATTAAATACACAAACCATTTAGCATAGTGCTCA	C	-	intergenic_variant	MODIFIER	-	-	-	-
sv_05144	3	8752014	8752151	137	DEL	ACTCCTGGTGTGTATGTTCTTATTGCCATTTTTTAAATTACTCAAATGAAGTTATCACATCTGTAGTTGTGTAATGATCATAACAATCTGATTTCACAGGCTTTCCAAGCACATCCCCCCACCCCCCCAGACCGTCCC	A	-	intergenic_variant	MODIFIER	-	-	-	-
sv_05220	3	13430619	13431044	425	DEL	TGTGGTGTAGGTCACAGAGGCGGCTTGGATCCCATGTTGCTGTGGTGTAGGCCAGCAGCTACAGCTCCAATTTGACCCCTAACCTGGGAACTACCATTTTCTGTGGGGTTCAGCCCTAAAAAGCAAAAAAAAAAAAAAAAAAAAAGAAGTGGTACATGTATATGCAATAGAAAGCTACTCAGCCATAAAAAAGAATAATGCCATTTGCAACAACATGGATGGAAATAGAGATTCTAATACTAACTGAAGTAAGTCAGAAAGAGAAAGACATCGATGCCATATGATATCACTTACATATAGAATCTAAAATATGGCAGAGGAGTTCTTGTGGAGCAGTGGTTAACAAATCCGACTAGGAACCATGAGGTTGCGGGTTCAATCCCTGGCCTTACTCAGTGG…	T	-	intergenic_variant	MODIFIER	-	-	-	-
sv_05279	3	16664128	16665024	896	DEL	GTGGCCGTGGTCCCTTTCTCCTGATCCTGGGAACCAGGACCTCGAAATCCATCAAACCCTAAGGTTGTGAAGGTGGGGAAACAAACTCTGAAAATGGGTTTCTGGAGGAGAGGGTGAGGGGGCGGTTTCCACTTCTATTCGCCTTGATTCCTGGACTGTGTGATCCAGCTGCCAGGGAACACCAAGTGTTGGCACATTCCACATCCCGGAGGAGAGCACCCCACATCTGCAGTGCCCTGTGCCCACGCTGGTGCCCTTGTTAAACTTTTCAAGGCCACTCCATCCTCCTAATAGGCCCCCATTTCTGGGCGATGCCCGCTATGGAGGGGCCAGTGGATGCGGAAGTCATGTGCCCATTCTTAGGCCTCTCTCACCATAAAATGGGTCTGTCATCTGGGG…	G	-	intergenic_variant	MODIFIER	-	-	-	-
sv_05347	3	20267715	20267886	171	DEL	TTAAAAATAGGACGGCCTGCTGAATAGCATTGAGAACTATGTCTAGATACTCATGTTGCAACAGAAGAAAGGGTGGGGGGAAAACTGTAATTGTAATGTATACATGTAAGGATAACCTGACCCCCTTGCTGTACAGTGGGAAAATAATAAAAAAAAAAAAAGAAAAAAAAAA	T	-	intergenic_variant	MODIFIER	-	-	-	-
sv_05355	3	20505277	20506073	796	DEL	CACAGCCACAGCAATGCCAGATCTGAGTGACACCGCAGGATCCACGGCAGCGCTGGATCCTAACCCAATGAGCGAGGCCAGGGATCGAACCCACATCCTCATGGATGCAAGTCAGATTCGTTAGCCACGGAGCCATGACGGGAACTCCCATAGGGGATCATTTTAAAATCATCATCTAGAAGCATCCTACAGAATCATCTTCTAGAATCAATCCATAGACCCATCATACGGATCAATCACAGAGAACTATCCTATAAAACCATTGTATAGACACATCACACAGCCCCTCAGAGTTAGAATGTCGTGGATTAAGACAGTGGGGAGGTAAACCTCATCTGTTTACCACTATGTTTATGTATCCATTAACCATTCTTTTTTCTTTTTCTTTTTCTTTTCTTT…	C	-	intergenic_variant	MODIFIER	-	-	-	-
sv_05384	3	21815783	21816082	299	DEL	TAAAATTTTACTATGGGAGTTCCCGTCGTGGCGCAGTGGTTAACGAATCCGACTAGGAACCATGAGGTCGCGGGTTCGGTTCCTGCCCTGCTCAGTGGTTAACGATCCGCGTTGCCGTGAGCTGGTGTAGGTTGCAGACGTGGCTCGGATCCCGCGTGCTGTGCTCTGGCGTAGGCCAGTGGCTACAGCTCCGATTCAACCCCTAGCCTGGGAACCTCCATATGCCGCGGAAGCGGCCAAGAGATAGCAACAACAACAACAACAACAACAACAAAAAGACAAAAGACAAAAAAAAAAAAA	T	-	intergenic_variant	MODIFIER	-	-	-	-
sv_05534	3	34606754	34607227	473	DEL	CTTATAGAATCACAAGTAATTTCCCTGTTGGGGGAAGCGTTAAAGGCGATGAGATGAGTTGCAAAACTCCAGGGCACCAGCAGTGTACCAGCTGGCCCTAGCCTCTGGGGCGTAGCCCTGTGATAATTTGTTGAGTGCCCATTGTATCAGTGTCAGACTCTGAAATGCACCTCATTATTTTGCTTAGACTTCACAAGAACTCATTAAAAAAAGGTACAATTATCTACCTTTTACCACCATGGAAGTTCATGCTCTCAACCACTGGGCAACCGGCTTAAAATCACACTGCTCTGACATGCTGGCTGTTAAGTCCGCCAGACACCAAAGCTCTACAAGATTCTTCACCCTGATATTTAAGTTCAATCAGTTCCGAAAAATAACCAAGATCTGACTTAATTA…	C	-	intergenic_variant	MODIFIER	-	-	-	-
sv_05593	3	43811350	43811630	280	DEL	GAAATTAGAAACAGGAGTTCCCGTCGTGGCGCAGTGGTTAACGAATCCGACTAGGAACCATGAGGTTGCGGGTTCGGTCCCTGCCCTTGCTCAGTGGGTTAACGATCCAGCGTTGCCGTGAGCTGTGGTGTAGGTTGCAGACGTGGCTCGGATCCCGCGTTGCTGTGGCTCTGGCGTAGGCCGGTGGCTACAGCTCCGATTCGACCCCTAGCCTGGGAACCTCCATATGCTGAGGGTGCGGCCCAAGAAATAGCAACAACAACAAAAAAAAAAAAAAAAAA	G	-	intergenic_variant	MODIFIER	-	-	-	-
sv_05718	3	53739172	53739225	53	DEL	TCCCTGCAAGACAGCCGACTATGGTGATGAGCTATAGGTACTGAATCCATTTAA	T	-	intergenic_variant	MODIFIER	-	-	-	-
sv_05719	3	53815697	53816129	432	DEL	TGCTGTGGCTGTGGTGTAGGCCGGCAGCTGCAGCTCCGATTTGACCCCTGGCCTGGGAACCTCCATAAGCCACGAGTGCGACCCTAAAAGACAAAAAAGAAAGAAAATTGACAGAACACTGCAAACCAACTATATCAAAATGATATAGATAAAAACAATATAGACAAGCAAAAATGGAATTTAAAAAAATGTTCCTTCAAGAAAGGTGGGTTCTCCTTTCTTGAAGACAGGATCAGCCAGACCAAGAACTCTGGCATTAATTGGCTCAAAGGGCCATGTCTGTATACCCCAAGAGGTTGGAGTTCCTGTTGTGGCACAGCGGAAATGAATCCGACTAGAAACCATGAGGTTTTGGATTCGATCCCTGGCCTCAGTGGGTAAAGTGTTGCTGTGAGCTGT…	T	-	intergenic_variant	MODIFIER	-	-	-	-
sv_05902	3	68310340	68310463	123	DEL	GCAGGTGGAGTGGGCCCTGGGCTGGACTGGAAAGTGTGGCCCCTTATGAAGGGGCATCTGGCAAAAGGTGGCCAGATGGGAATACAGGATACTCATTTTTCAACTGAATCTGCCCATTTTTCCA	G	-	intergenic_variant	MODIFIER	-	-	-	-
sv_06041	3	80327086	80327086	65	INS	C	CTATACTGTCTATTGTTTGTCCGTTATAAGAGAAAAATAAGCTCTGTTTAAGCCACTTTTTTCCCT	-	intergenic_variant	MODIFIER	-	-	-	-
sv_06055	3	81966211	81966405	194	DEL	GAAAGGAGAAGACAGAGCTGAGGTGATTCTTCTGATCTGATAAACACTAAATTTTGTAGAAGCAAGGTTTATCTGAAGTCATAGGCTGATAGTTGCCCTTAGAACATGGTTAATCAAGAACAAAATTGGAATGTAATTTAAAGTTGGGCCATTTAACTCAGAAACATCTAGGGGGAAGTTCAGGGTTGCAGCCAA	G	-	intergenic_variant	MODIFIER	-	-	-	-
sv_06268	3	103828364	103828496	132	DEL	CACTATAAAATTCTTAGAGGAAAACATAGGCCAAACACTCTGTGACGTAAATGACAGCAACATCTTCTCAGATCCATCTCTTAGAGTCATGACAGTAAAAATAAAAATAAACAAATGGGACTTAATTAAACTT	C	-	intergenic_variant	MODIFIER	-	-	-	-
sv_06466	3	117228496	117228496	69	INS	T	TTCTTTGAAAGTACAAACAACTTTAGAAACTCTAACCAAGAATAGTCCACAGCAGACATTTTAAAGGGGA	-	intergenic_variant	MODIFIER	-	-	-	-
sv_06482	3	118108565	118108830	265	DEL	TTATTTTTTTTTTTTTGTCTTTTTGCTATTTCTTGGGCCGCTCTTGCGGCATATGGAGGTTCCCAGACTAGGGGTTGAATCGGAGCTGTAGCCCCTGGCCTACGCCAGGGCCACAGCAACGCGGGATCCGAGCCGCGTCTGCAACCTACACCACAACTCACGGCAACGCCGGATCCTTAACCCACTGAGCAAGGGCAGGGATCGAACCCGCAACCTCATGGTTCCTAGTCGGATTCGTTAACCACTGCGCCACGATGGGAACTCCC	T	-	intergenic_variant	MODIFIER	-	-	-	-
sv_06705	3	131465544	131465751	207	DEL	ATCCTCCTTCGTGTCTGTGGGTCCGTCTGCTCCGGGGCCACCGTCCTCCTTCGTGTCTGCGGGTCCGTCTGCTCCGGGCCCACCGTCCTCCTTCGTGTCTGCGGGTCCGTCTGCTCCGGGGCCACCGTCCTCCTTCGTGTCTGTGGGTCCGTCTGCTCCGGGCCCACCGTCCTTCGTGTCTGTGGGTCCGTCTGCTTCGGGCCCACCG	A	-	intergenic_variant	MODIFIER	-	-	-	-
sv_06808	4	6690207	6690380	173	DEL	CGAAAGAAAGAAAGAAAGAAAGAAAGAAAGAAAGAAAAAGAAAGAAAGAAAGAAAGAAAGAAAGAAAGAAAGAAAGAAAGAAAGAAAGAAAGAAAGAGAGGGAAAGGAAAGGAAAGGAAAGGAAAGGAAAGAAAGGAAGGAAGAAAGAAAGAAAGAAAGAAAGAAAGAAAGAAA	C	-	intergenic_variant	MODIFIER	-	-	-	-
sv_06858	4	9329714	9329997	283	DEL	AGAAAGACTCCCAAGTTCCCGTCGTGGCGCAGTGGTTAACGAACCCGACTAGGAACCATGAGGTTGCGGGTTCGGTCCCTGCCCTTGCTCAGTGGGTTAACGATCCGGCGTTGCCGTGAGCTGTGGTGTAGGTTACAGTTGTGGCTCGGATCTCGTGTTGCTGTGGCTCTGGCGTAGGCCGGTGGCTAGAGCTCCGATTCGACCCCTAGCCTGGGAACCTCCGTATGCCGCGGGAGCGGCCCAAAGAAATAGCAAAAAGACAAAAAAAAAAAAAAAAAAAAAAG	A	-	intergenic_variant	MODIFIER	-	-	-	-
sv_07012	4	17723343	17723501	158	DUP:TANDEM	GGGACCGAACCCGCAACCTCATGGTTCCTAGTCGGATACGTTAACCACTGCGCCACAACGGGAACTCCAACCTCCCACTTTCAAAACAAGGAAGAACTAGAGAAAGCCGAGGTATAACTGCCATTTAACCAGAATACAACATCCTAAGTCTATTTTTCC	GGGACCGAACCCGCAACCTCATGGTTCCTAGTCGGATACGTTAACCACTGCGCCACAACGGGAACTCCAACCTCCCACTTTCAAAACAAGGAAGAACTAGAGAAAGCCGAGGTATAACTGCCATTTAACCAGAATACAACATCCTAAGTCTATTTTTCCGGACCGAACCCGCAACCTCATGGTTCCTAGTCGGATACGTTAACCACTGCGCCACAACGGGAACTCCAACCTCCCACTTTCAAAACAAGGAAGAACTAGAGAAAGCCGAGGTATAACTGCCATTTAACCAGAATACAACATCCTAAGTCTATTTTTCC	-	intergenic_variant	MODIFIER	-	-	-	-
sv_07153	4	28383424	28383909	485	DEL	GAGAGGGCTAAGGGAACTAGAGACTCTACTCTTAAAGGGTGCACACAAAACCTCACACATTCCAGGACCCAGGGCAGAAGCAGTTATTTAAAAAGCACATGAAAAAATGCTCAACATCGCTGATAATTAGAGAAATGCAAATCAAAACTACTGTGAAGCACCACCTCACACCAGTCAGAATGGCCATCATTAATAAGTCCACAAATAACAAATGCTGGAGGGGGTGTGGAGAAAAGAAACCCTTCTACACTGTCGGTGGAATGTAAATTGGTACAACACGGAAAACAGGATGGAGGTGCCTCAGAAAATTAAATATAGAACTACCATATGACCCAGAAATCCCACTCTTGGGCATATATCTGGACAAAACTTTCCTTGAAAAAGACACATGCACCTGTA…	G	-	intergenic_variant	MODIFIER	-	-	-	-
sv_07202	4	32985156	32985445	289	DEL	CAGAAATGCCTTTTCGGAGTTCCCGTCGTGGCGCAGTGGTTAACGAATCCTACTAGGAACAATGAGGTTGCGGGTTCGATCCCTGCCCTTGCTCAGTGGGTTAACGATCCGGCGTTGCCGTGAGCTGTGGTGTAGGTTGCAGACGCGGCTCGGATCCCGCGTTGCTGTGGCTCTGGCGTAGGCCGGTGGCTACAGCTGCGATTCGACCCCTAGCCTGGAACCTCCATATGCCGCGGGAGCGGCCCAAGAAATAGCAACAACAACAACAACAACAAAAAAAAAAAAAAAAA	C	-	intergenic_variant	MODIFIER	-	-	-	-
sv_07232	4	34571344	34571552	208	DEL	GTGGCACAGTGGGTTAAAAATCTGACTGCAGCAGCTCGGGTCTCTGTGGAGCTGCAAGTTTGATCCCCAGGCAGGTACAGTGCGTTAAACAAGCTGGAGTTACTGCAGCTTCAGTGTAGGTCACAGCTGCAACTTGGATTCAGTCCCTATCCTGGAACTTCCATATGCGGTAGCTGTGGTCATAAAAGTAAATACAGGACTTCCCGTCA	G	-	intergenic_variant	MODIFIER	-	-	-	-
sv_07257	4	36462276	36462589	313	DEL	AGGAACTCCTGAGGTTTTCTTTTTTTTTTTTTTTTTTTTTTTTTTTTTTTTGTCTTTTTTGTTGTTGTTGTTGTTGTTGTTGCTATTTCTTGGGCCGCTCCTGCGGCATATGGAGGTTCCCAGGCTAGGGGTCCAATTGGAGCTGTAGCCACCGGCCTACACCAGAGCCACAGCAACGCGGGATCCGAGCCGCGTCTGCAGCCTACACCACAGCTCACGGCAACACCGGATCGTTAACCCACTGAGCAAGGGCAGGGACCGAACCCGCAACCTCATGGTTCCTAGTCGGATTCGTTAACCACTGCGCCACGACG	A	-	intergenic_variant	MODIFIER	-	-	-	-
sv_07259	4	36531512	36531909	397	DEL	TAAGATCTCAGACACCGGGGTGGGTCTCAAGGACACAGCGGCCCCCGGGGCCAGCCTGGCTCAGGCAGCTGAAGAACACCCTCCTCAGACCCGCCAGCCCCAGCCCCAGCTGAAGTCCCCAGCTTGGGGTGAGGAGGCTGGATGCCCAGCCTTTGCCTAACTCCTGGGCTCAGGGCACCCTGGGCCCCGTGGGGATGGAGACCAGGAGCAGAGAGCTGATGGTGGCTGACAGCCACACACGGACAGGCTCCTCTGCACCATGGAGCATAACAGCCACAGAGGTCATGCCCATCAAGGAAGGCCACTGAGGAAGGGAGAAAGGGGAGGCCCCGGGGACCCAGGCCTGTCCACCTGCCAGGTGCAGCAGGTGGAGTTCCCCCCCCCCCAAAAAAAAAAAA	T	-	intergenic_variant	MODIFIER	-	-	-	-
sv_07300	4	41061466	41062243	777	DEL	GGAACCTCCATATGCTGCAGCCCAAAGAAATAGCAAAAAGACCAAAAAAAAAAAAAAAAAAAAAAAAAGCAAGACGGGTCAAGCTAAGACTAAGACAAAGGTGGGTAAAGAGAGTCCTGGCAGAAGAGCAGATCCAAACAAGTGCGTGGCTGTGGGTCCTCCAGGAAGAAAGGAGGGACTTTCTAAGGGGGAAAACATCAGCCCCAGGGCAGTTTGAGCTTTCCATTAGTGGCTCATTTACCTGAAAGAGACTGAGAAAACTTTCAAAAAAAAAAATGAGTATTGCACCTATTTCAATATTTCAATATGTGTGGGTGGGAGTTTCCCCACCATCAATGAGCAATGCTCCAACACTAGCTGAGTGTCCTACAACTCAGGTGGATTCTGACACTGTTTACC…	G	-	intergenic_variant	MODIFIER	-	-	-	-
sv_07399	4	53038769	53038769	68	INS	G	GGACTAACCTCTGGAGCCGAGGTCTCGGTGCCCAGCCCCTACCCAGGCTTCCCCGGGCCCTTTCCTGGA	-	intergenic_variant	MODIFIER	-	-	-	-
sv_07431	4	56709092	56709183	91	DEL	CCTCAAGTGTGGCCCTAAAAAGCAAAAAAAAAAAAAAAAAAAAAAAAAAAAAAAGGCTTAGCTGTTAAGACCATATACTCCTCTTGTGTTCT	C	-	intergenic_variant	MODIFIER	-	-	-	-
sv_07458	4	58041034	58041344	310	DEL	TGGAAATCATGCTGGAGTTCCCGTCGTAGCACAGTGGTTGGCGAGTCCGACTAGGAACCATGAGGTTGCGGGTTCGGTCCCTGCCCTTGCTCAGTGGGTTAACGATCCAGCGTTGCCGTGAGCTGTGGTGTAGGTTGCAGACACGGCTCGGATCCTGCGTTGCTGTGGCTCTGGCGTAGGCCGATGGCTACAGCTCCGATTAGACCCCTAGCCTGGGAATCTCCATATGCCGCGGAAGCGGCCCAAGAAATAGCAAAAAGACAAAATCAATAAATAAATAAATAAATAAAATATTTCTAAAAAAAAAAAAA	T	-	intergenic_variant	MODIFIER	-	-	-	-
sv_07589	4	68720379	68721156	777	DEL	GAGCTCCTACCCCTCTAGGCACGAAGGGTGGGCTTGCCAGAAGCCAGAGAAAGTGCTGCCTGAAGAGGGTTGCCAGCCGTCACAGCCGTTCGTAGCCCCTCAGCAAGGAGCAGGTCAGCGATCCCACATTCTCCTCGCCTCTGTTACCTTGCAGAGAGGTTCCTCTCTGTCCAGTCCTGAGACTTCCGCTCTCAGCCTTTTGAAGGCAGGTTCTGACCCTCAGTGAAGCAGGGTTCTTACTGCTGTGAACCCACATCAGACCCCTTCTCATAGACAGCACAACAGTTCGCAGACATGCAACTGTCACTGGAGTCTGCTGTCTCCCACAGCCAGAATCAGGTTCGGTACACACTTCACCTTCAAAGCTTATCATTCTTTTTGGCAAGTTCCTCTCTGAGA…	G	-	intergenic_variant	MODIFIER	-	-	-	-
sv_07590	4	68727220	68727516	296	DEL	AAATAATGTCGGAGGTCCCGTCGTGGCGCAGTGGTTAACGAATCCGACTAGGAACCATGAGGTTGCGGGTTCGGTCCCTGCCCTTGCTCAGTGGGTTAACGATCCGGCGTTGCCGTGAGCTGTGGTGTAGTTTGCAGACGCGGCTCGGATCCTGCGTTGCTGTGGCTCTGGCGTAGGCCGGTGGCTACAGCTCCGATTCAACCCCTAGCCTGGGAACCTCCATATGCCGCGGGAGCGGCCCAAGAAATAGCAACAACAACAACAAAAAGACAAAAGACAAAAAAAAAAAAAAATAAT	A	-	intergenic_variant	MODIFIER	-	-	-	-
sv_07980	4	103169305	103169394	89	DEL	GAGAGAAAGAGAGAAAGAAAGAAAGAAAGAAAGAAAGAAAGAAAGAAAGAAAGAAAGAAAGAAAGAAAGAAAGAAAGAAAGAAAGAAAGA	G	-	intergenic_variant	MODIFIER	-	-	-	-
sv_08184	4	114614973	114615394	421	DEL	AAAAATGTTGATATGTTTCAGCAATCTATAGAGCTGACAAAAGTTAATCACAGAGAATTTTCAAGCTGAATATTAGGTATTAATCTTAATATATGAGTCTGACTCTATGCTGGTTGTTCTCACAAGTACTATCTTATCCAATTTTCCCAGCTTTGTAAATAGGTATTATTAGCCTGATTTCACCAATGAAAAAACTGAAGCCCAGAAAGACTAAGTAACTTATTTATATTTATATATTTAATCATTGTGTCCAGACCAAAAATCTTGTCATCAGAAATTAAACCAAGTGTTTTTGTTGGTAACTTTTAATTTCAATGAACCCACAGCTATTGGGTTCATGAGAGATTATTAACTTTCAGGATATTATATATTTAAAAGATTACTTTCCTCAAAAGTAAC…	A	-	intergenic_variant	MODIFIER	-	-	-	-
sv_08197	4	116010931	116011220	289	DEL	TCAATGACTGCTGATCAGGGAGTTCCCGTCATGGCGCAGTGGTTAACGAATCCGACTAGGAACCATGAGGTTGAGGGTTCGGTCCCTGCCCTTGCTCAGTGGGTTAACGATCCGGCGTTGCCGTGAGCTGTGGTGTAGGTTGCAGACGCGGCTCGGATCCCACGTTGCTGTGGCTCTGGCGTAGGCTGGCGGCTACAGCTCCGATTCGACCCCTGGCCTGGGAACCTCCATATGCCGCAGGAGCGGCCCAAAGAAATAGCAAAAAGACCAAAAACAAAACAAAAAAAAAA	T	-	intergenic_variant	MODIFIER	-	-	-	-
sv_08205	4	116420173	116420249	76	DEL	CTTTCTGGCACTTAAGTCTAAATGTCAGGCAGATCTTAAAGGAGAGGAAAGGGTTTAAGTGATCGTGACCAGTGACA	C	-	intergenic_variant	MODIFIER	-	-	-	-
sv_08271	4	118793273	118793562	289	DEL	ATGGTGTAGGTCGCAGATGCGGCTTGGATTCCGCGTTGCTGTGGCGTAGACCAGCAGATGCTGCTCCAGTTCAACCCCTAGTTTCTATATGCCACAGGTGTGGCCGTAAAAAGACCAAAAAAAAGTCCTCTTCAAGGACACCAGTATCTTTTTCTCAGGACTGATAATGAGGGTTGGGGGAGTTCCCATCGTGGCGCAGTGGTTAACGAATCCGACCAGGAATCATGAGGTTGCGGGTTCGGTTCCTGCCCTTGCTCAGTGGGTTAACGATCCGGCATTGCCATGAGCTG	A	-	intergenic_variant	MODIFIER	-	-	-	-
sv_08446	4	128666306	128666404	98	DUP:TANDEM	ACAAAGAGTCAGACTCCATTAAAAAAACCCTCCCTGAGTTACCCAATCTACACTGCAGCCCTGTTGTCATGATGACACCAGAAAAGGTCCTTCCACTTA	ACAAAGAGTCAGACTCCATTAAAAAAACCCTCCCTGAGTTACCCAATCTACACTGCAGCCCTGTTGTCATGATGACACCAGAAAAGGTCCTTCCACTTACAAAGAGTCAGACTCCATTAAAAAAACCCTCCCTGAGTTACCCAATCTACACTGCAGCCCTGTTGTCATGATGACACCAGAAAAGGTCCTTCCACTTA	-	intergenic_variant	MODIFIER	-	-	-	-
sv_08495	5	2799388	2799388	84	INS	G	GTAAAGTAAATAAAATGAAAACAGGGAGCAATAGCACTTAGGAGCTGGGGTGACTGGTGGGATCGCGGCTGTCCTGTGAGTAAAA	-	intergenic_variant	MODIFIER	-	-	-	-
sv_08516	5	4264933	4265267	334	DEL	AAAAAAAAAAAAAAAAAACATATGATATCACTTATAACTGGAATCTAATATCCAGCACAAATGAACATCTCCTCAGAAAAGAAAATCATGGACTTGGAGAAGAGACTTGTGGCTGCCTGATGGGAGGGGGAGGGAGTGGGAGGGATCGGGAGCTTGGGCTTATCAGACACAACCTAGAATAGATTTACAAGGAGATCCCGCTGAATAGCATTGAGAACTTTGTCTAGATACTCATGTTGCAACAGAAGAAAGAGTGGGGGAAAAACTGTAATTGTAATGTATACATGTAAGGATAACCTGACCCCCTTGCTGTACAGTGGGAAAATAAAAAAAAC	A	-	intergenic_variant	MODIFIER	-	-	-	-
sv_08518	5	4283596	4283596	64	INS	A	AGACACCCCAAAACTAACTGACACACCACCCCTGAAAGACCCTCAGGGCAGAGAAAGCCCGGAGG	-	intergenic_variant	MODIFIER	-	-	-	-
sv_08770	5	18244375	18244677	302	DEL	TAAAAAAGACAAATATGGGAGTTCCCGTCGTGGCGCAGTGGTTAACGAATCCGACTAGGAACCATGAGGTTGCGGGTTCGGTCCCTGCCCTTGCTCACTGGGTTAACGATCTGGCGTTGCCGTGAGCTGTGGTGTAGGTTGCAGACGCGGCTCGGATCCCGCGTTGCTGTGGCTCTGGCGTAGGCCGGTGGCTACAGCTCCGATTCAACCCCTAGCCTGGGAACCTCCATATGCCGCGGGAGCAGCCCAAGAAATAGCAACAATAACAACAACAACAACAAAAGACAAAAGACAAAAAAAAAA	T	-	intergenic_variant	MODIFIER	-	-	-	-
sv_08836	5	23431629	23432123	494	DEL	CATGGCATCACCAGATCCTCAACCCACTGAGTGAGGCCAGGGATCGAACCCGCAACCTCATGGTTCCTAGTTGGATTCGTTAATCACTGAGCCACAACGGGAACTCCCATGTCTTCTTGTTTTAAGAAACCTCTGTTCATATCTTTGCCCATTTTTCTATCACATTGTCTTTTTCTTATTAATATTATATTATTTTATTTTTTGCTTTTTAGGGCCACACTTGTGGCATATGGAAGTTCCCAGGCTAGGGGTTGAATCAGAGCTACAGCTGCCAGCCTACACTACAGCCACAGTACCACAGCAATGCCAGATCCAAGCCACATCTGGGAACTTACACCACTATTCATAGCAACATCAGATCACTGACCCACTGAGCAAGGCCAGGGATCGAACCCACAA…	C	-	intergenic_variant	MODIFIER	-	-	-	-
sv_08860	5	24947364	24947645	281	DEL	TAAAGAATCTTAGGGAGTTCCCGTCGTGGCGCAGTGGTTAACGAATCCGACTAGGAACCATGAGGTTGCGGGTTCGGTCCCTGCCCTTGCTCAGTGGGTTAAGGATCCAGCGTTGCCACGAGCTGTGGTGTAGGTTGCAGACAGGGCTCGGATCCCGCGTTGCTGTGGCTCTGGCGTAGGCCGGTGGCTACAGCTCCGATTCAACCCCTAGCCTGGGAACCTCCATATGCCGCGGAAGCGGCCCAAGAAATAGCAAAAAGAAAAAAGAAAAAAAAAAAGAAA	T	-	intergenic_variant	MODIFIER	-	-	-	-
sv_08908	5	27695070	27695165	95	DEL	CATTTCACTTCTTTAGGCCCATTTTTTCCCCTCACAGATTCATAGTTAATACAATTATAATAATGGCAAAGTGGCAAGAACTTGTAAAAGTTCTTA	C	-	intergenic_variant	MODIFIER	-	-	-	-
sv_08915	5	28061622	28061702	80	DEL	GGCTCTTGTATTTTTATCCAGTCTGCCAATCTATATTCTTTTGATGGAATGTTCAGTCCATTGACATTTAAGGTAATTATT	G	-	intergenic_variant	MODIFIER	-	-	-	-
sv_09033	5	35066701	35066901	200	DEL	TAGAAAAATATTTCTGTTCTAATTTGTGTCTGATAAGCCCAAGCTCCCGATCCTGCTGAATAGCATTGAGAACTATGTCTAGATACTCATGTTGCAACAGCACAAAGGGTGGGGGAAAAATGTAATTGTAATGTATACATGTAAGGATAACCTGACCCCCTTGCTGTACAGTGGGAAAATAAAATAAATAAATAAATAAAA	T	-	intergenic_variant	MODIFIER	-	-	-	-
sv_09036	5	35151373	35151434	61	DEL	CCTGCAGCAAGGTCATAACTGGGCAGCACACAACTATATTAATTGACCAACATCTCTTTCCT	C	-	intergenic_variant	MODIFIER	-	-	-	-
sv_09093	5	39996716	39997065	349	DUP:TANDEM	TACGGATCCTGGCCCGAGTCACACGGGACAGCTGGTCGACCCCACGGGCCCTCGGGCATGGGCCCGAGTCACCCCGCAGAGCTATTTAACCATGCGGGCAATCGGACCTTAGTGACACATGCCCGGGAGAGTTGGTAGTACCCGCGGGCCCTTGGACCCAGGCCCGAGTGGCCTTTGAGAGCTGGTCGACCCCGCGGGCCCTTGGACTCAAGAACTAGTCACCCGGGTCAGCTCTCGACCATGAGGGCCTTCAGATTCAGGCCCGAATCGCCTGGGATAGTTGTTCAACCCCACTTGCCCTAGGGCACAAGCGCCAGTGGCCCGGGACAGCTGATCCACCACAAGGGCCC	TACGGATCCTGGCCCGAGTCACACGGGACAGCTGGTCGACCCCACGGGCCCTCGGGCATGGGCCCGAGTCACCCCGCAGAGCTATTTAACCATGCGGGCAATCGGACCTTAGTGACACATGCCCGGGAGAGTTGGTAGTACCCGCGGGCCCTTGGACCCAGGCCCGAGTGGCCTTTGAGAGCTGGTCGACCCCGCGGGCCCTTGGACTCAAGAACTAGTCACCCGGGTCAGCTCTCGACCATGAGGGCCTTCAGATTCAGGCCCGAATCGCCTGGGATAGTTGTTCAACCCCACTTGCCCTAGGGCACAAGCGCCAGTGGCCCGGGACAGCTGATCCACCACAAGGGCCCACGGATCCTGGCCCGAGTCACACGGGACAGCTGGTCGACCCCACGGGCC…	-	intergenic_variant	MODIFIER	-	-	-	-
sv_09094	5	39996758	39996758	100	INS	C	CCCTAGCCCTAGGACACAAGCGCCAGTGGCCCGGGACAGCTGGTCCACCACAAGGGCCCTCGGATCCTGGCCCGAGTCACACGGGACAGCTGGTCGACCCG	-	intergenic_variant	MODIFIER	-	-	-	-
sv_09099	5	40067608	40067707	99	DUP:TANDEM	GGGAGAGCAGGTCGACCCCGCAGGCCCTCGGACCCGGACCGGAGTCACCCGGGACCGCTGGTTGACCCCGTTTGCCCACAGACCAAGCGCAAGTCGCCTG	GGGAGAGCAGGTCGACCCCGCAGGCCCTCGGACCCGGACCGGAGTCACCCGGGACCGCTGGTTGACCCCGTTTGCCCACAGACCAAGCGCAAGTCGCCTGGGAGAGCAGGTCGACCCCGCAGGCCCTCGGACCCGGACCGGAGTCACCCGGGACCGCTGGTTGACCCCGTTTGCCCACAGACCAAGCGCAAGTCGCCTG	-	intergenic_variant	MODIFIER	-	-	-	-
sv_09100	5	40067629	40067629	164	INS	A	AGGCTCTTGGATGCAAGCACGTGTGGACCGCGAGAGCAGGTCCACCCTGCAGGCCCTCTGAGCCGGTCCGGAGTCCCCTGGGACAGCTTTATGACCCCGTG	-	intergenic_variant	MODIFIER	-	-	-	-
sv_09106	5	40081598	40081598	99	INS	A	AGAGTCGCCGGGGACATCTGGTTGACCCCCGGGGCCTCGGGCATGGTCCTGAGGTGCCCGTGAGACCTGGTCGACCCAGCTGGCCTTTGGAACCGTGCCC	-	intergenic_variant	MODIFIER	-	-	-	-
sv_09110	5	40083626	40083626	107	INS	T	TGGGTGCCGAGTCTCCCGGGAAGGTGGTCGACTCCACAGGCATTCGGACCCTGGCCCCAGTCACCTGGGACAGCTGGTCAATCCCAAGTGCATTCGGACCCGGGCCCC	-	intergenic_variant	MODIFIER	-	-	-	-
sv_09125	5	40202147	40202841	694	DUP:TANDEM	AGCTGTCCCCACCAAATCAGACCTGGGTCCGAAGAGCTGTGGGGTTGACCAGTTCTCCTGGCCAACTGGGTCCCGAGTCCGAGTTCCTGCGGGGTCGACCAGCTGTCCCGGCCGACTCGGACCCGGGTCCGAGGAGATGTGTTGTTGACCAGCTATCCTGGCCAAATCAGTCCAGGGTCCGAGCTGACTCGGGGTTTACAATCTGTCCCGCCCGACTCGGACCCGGGTCCAAGGAGCTGTGGGGTTGACCAGCTATCCGGGCCAACTCGGTCCCGGGTCCGAACAGGTGTGGGGTCGACCAGCCATCCCGGCCGACACGTCTCGGGTTCTAGCTGATGCGGGGTCGACTTACTATACCGGCCAACTCGGTCCTGGGTCCGAGGTGACACATGGTCAACC…	AGCTGTCCCCACCAAATCAGACCTGGGTCCGAAGAGCTGTGGGGTTGACCAGTTCTCCTGGCCAACTGGGTCCCGAGTCCGAGTTCCTGCGGGGTCGACCAGCTGTCCCGGCCGACTCGGACCCGGGTCCGAGGAGATGTGTTGTTGACCAGCTATCCTGGCCAAATCAGTCCAGGGTCCGAGCTGACTCGGGGTTTACAATCTGTCCCGCCCGACTCGGACCCGGGTCCAAGGAGCTGTGGGGTTGACCAGCTATCCGGGCCAACTCGGTCCCGGGTCCGAACAGGTGTGGGGTCGACCAGCCATCCCGGCCGACACGTCTCGGGTTCTAGCTGATGCGGGGTCGACTTACTATACCGGCCAACTCGGTCCTGGGTCCGAGGTGACACATGGTCAACC…	-	intergenic_variant	MODIFIER	-	-	-	-
sv_09227	5	49130610	49130610	77	INS	A	AGACTTGAAACCACAAAATCACCTTGGATTACACTATCCTCTCTCTCACCACTCATATTCCATTTTGGCCACATTCTT	-	intergenic_variant	MODIFIER	-	-	-	-
sv_09334	5	59306360	59306506	146	DEL	TGCTGTGAGCTGTGGTGTAGGTCGCAGAGGTGGCCTGGATCCTGCATTGCTGTGGCTGTGGTGTAGACTGGCAGTTGGACCCCTACTGTACAGCACAGGGAACTATATCCAATCTCTTGTGATAAAACATGATAGAAAACAACATGA	T	-	intergenic_variant	MODIFIER	-	-	-	-
sv_09480	5	66269569	66269828	259	DEL	TGGTCTTTTTGTTGTTGTTGCTATTTCTTGGGCCGCTCCCGCGGCATATGGAGGTTCCCAGGCTAGGGGTTGAATCGGAGCTGTAGCCACCGGCCTACGCCAGAGCCACAGCAACGCGGGATCCGAGCCGCGTCTGCAACCTACACCACAGCTCACGGCAACGCCGGATCGTTAACCCACTGAGCAAGGGCAGGGACTGAACCGGCAACCTCATGGTTCCTAGTCGGATTCGTTAACCACTGCGCCACGACGGGAACTCC	T	-	intergenic_variant	MODIFIER	-	-	-	-
sv_09810	5	85635803	85635803	54	INS	G	GGTGGTACCATTAACTCAAGAGGACTGGAGCTTTGCTGGAGGGATAGAAGTAAGA	-	intergenic_variant	MODIFIER	-	-	-	-
sv_09849	5	87822217	87822765	548	DEL	GTTTAAGCAAAAGAGCAAAGCACTAGGGTGTCTGAGAAGTTTAAATACAGCTGTGTCCAGGGAACAGACCAATATTGGCACCTTTCATTTTTCTCTCTGTTTCTCCATGCTGCTCCTGTGTATTAGTTTTCTCTTAATATAAGACAGACTCCATGAGGCCTGAGAAGATTGCTCTGCATGGCTCTAGGCTACATCCTAATCTAGCAGCTTGGCAGAAAAAATCCTCTCTACCATCAACCATCAGTTCAGTAAAAGCCTCTGGTCCTGCTTAGACCACTGCTCAATCCTAAACCAATCAGTGTTTGGAAGAGGTTACTATGAATGGCCAAGCCTGGTTTATGTGCCATTACTGTGGCCAAATGAGTGAGGCCTTGGCAAATGTAGCCCATAGGAATCAGA…	G	-	intergenic_variant	MODIFIER	-	-	-	-
sv_09962	5	94186847	94186907	60	DEL	TCAGTTGTATGTACATATATATGTGTGTCTGTACACACACACACACATATATATATACACA	T	-	intergenic_variant	MODIFIER	-	-	-	-
sv_10038	5	97741181	97741181	85	INS	G	GCCCCAACAAAAAATTCTAAAAGAGTACAACAATACTAAACCCATTCTAAAAGAAATAATGAAAGTGCTTCTATAAATTAAACAAT	-	intergenic_variant	MODIFIER	-	-	-	-
sv_10051	5	98446207	98446261	54	DEL	CACTGGGCTAGAACCAGTGTCTCAACGGGGCTGTGTTCTTTTGGAGGCATTGAAG	C	-	intergenic_variant	MODIFIER	-	-	-	-
sv_10092	5	101656848	101657136	288	DEL	TAGAAAAAGGATCAGGAGTTCCCGTCGTGGCACAGTGGTTAACGAATCCAACTAGGAACCATGGGGTTGTGGCTTCAGTCCCTGGCCTTGCTCAGTGGGTTGAGGATCCGGCGTTGCCGTGAGCTGTGGTGTAGGTTGCAGACGCGGCTCGGATCCCGCCTTGCTGTGGCTCTGGCGTAGGCTGGTGGCTACAGCTCCGATTCGACCCCTAGCCTGGGAACCTCCATATGCCGTGGGAGCGGCCCAGGAAATAGCAAAAAGACAAAAAAAAAAAAGAAAAAAGAAAAAA	T	-	intergenic_variant	MODIFIER	-	-	-	-
sv_10119	5	103613958	103614043	85	DUP:TANDEM	CATTTTTTCTCTTTTAGGGGAGCTCTAACTTGCTCCATCATTCACACCTCACCCTGAATCTCAGAAAACTTCTAAGGTAGGTGTTT	CATTTTTTCTCTTTTAGGGGAGCTCTAACTTGCTCCATCATTCACACCTCACCCTGAATCTCAGAAAACTTCTAAGGTAGGTGTTTATTTTTTCTCTTTTAGGGGAGCTCTAACTTGCTCCATCATTCACACCTCACCCTGAATCTCAGAAAACTTCTAAGGTAGGTGTTT	-	intergenic_variant	MODIFIER	-	-	-	-
sv_10287	6	10958745	10958745	50	INS	G	GCAATCAAGCACACATTTTGCAGAAGGTCGCTGCTGATCTTGTGAAGGTTC	-	intergenic_variant	MODIFIER	-	-	-	-
sv_10569	6	29243917	29243917	50	INS	G	GCTCACCTTTAAGCCAAGGGAAGTGCCCAGAGAGTGGGGTAATTCTCTCTA	-	intergenic_variant	MODIFIER	-	-	-	-
sv_10597	6	31730636	31730936	300	DEL	TTAAAATGTACATTTAGGAGTTCCCGTCGTGGCGCAGTGGTTAGCGAATCCGACTAGGAACCATGAGGTTGCGGGTTCGGTCCCTGCCCTTGCTCAGTGGGTTAACGATCCGGCGTTGCCGTGAGCTGTGGTGTAGGTTGCAGACGCGGCTCAGATCCCGCGTTGCTGTGGCTCTGGCGTAGGCTGGTGGCTACAGCTCCAATTCAACCCCTAGCCTGGGAACCTCCATATGCCGCGGGAGCGGCCCAAGAAATAGCAACAACAACAACAACAACAAAAAAGACAAATGACAAAAAAAAAA	T	-	intergenic_variant	MODIFIER	-	-	-	-
sv_10602	6	32325580	32325699	119	DEL	TGGGAGTGACCGCACACCGCATGTGCAGAGGCTCCTTATAGACCCAGCCTGGTTCTTATCCAATGTCTTCTCTTCGCGTTGTACCTGATTTTATTACTAGTTTTTATTCGAATCCATTGG	T	-	intergenic_variant	MODIFIER	-	-	-	-
sv_10687	6	38829898	38829898	101	INS	C	CCCAGAAGGCAGCACCCTGAATGGAGTATGCAGCGGAGCATAAGATGTGGCCTCGGTGCTAAGTTCCCTAGCTGGCCCTGGGTTGACTGCTGGGGCCTCCGC	-	intergenic_variant	MODIFIER	-	-	-	-
sv_10702	6	39773631	39773706	75	DEL	GCCGCGTCTGCGACCTACACCACAGCTTATGGCAATGCCGGATCGTCAACCCACTGAGCAAGGGCAGGGATCGAAC	G	-	intergenic_variant	MODIFIER	-	-	-	-
sv_10704	6	40235194	40235284	90	DEL	GGGAGGGTGTGGCTTAGTGGGAGGGTGTGGCTTAGTGGGAGGGTGTGGCTTAGTGGGAGGGTGTGGCTTAGTGGGAGGGTGTGGCTTAGTA	G	-	intergenic_variant	MODIFIER	-	-	-	-
sv_10733	6	43745682	43745777	95	DUP:TANDEM	ACAGCTCAGATCCTGCATTGCTGTGGCTATGATGTAGGCCGGCAGTTGTAGCTCCGATTCAGCCCCTCCCCTGGGAACCTCCATATGCCATGGGTG	ACAGCTCAGATCCTGCATTGCTGTGGCTATGATGTAGGCCGGCAGTTGTAGCTCCGATTCAGCCCCTCCCCTGGGAACCTCCATATGCCATGGGTGCAGCTCAGATCCTGCATTGCTGTGGCTATGATGTAGGCCGGCAGTTGTAGCTCCGATTCAGCCCCTCCCCTGGGAACCTCCATATGCCATGGGTG	-	intergenic_variant	MODIFIER	-	-	-	-
sv_10832	6	56734666	56734763	97	DUP:TANDEM	ACACCAGAACTCAGTCCACGTCCCAAAGCCCAGGTCAAGCTGGGGTTTCCAAAGGACCAGCTCGCCAGCTGATCCCACCCAACAGCCAAACACCACCA	ACACCAGAACTCAGTCCACGTCCCAAAGCCCAGGTCAAGCTGGGGTTTCCAAAGGACCAGCTCGCCAGCTGATCCCACCCAACAGCCAAACACCACCACCACCAAGCCCTTTTAATAAAACGGGTCAAAGCCCTGAATGGACAAGTCCCTAATCCAGAGGCACACAGGGCCACTAGCAGCAGAAACAAAGGACCACCAGAACTCAGTCCACGTCCCAAAGCCCAGGTCAAGCTGGGGTTTCCAAAGGACCAGCTCGCCAGCTGATCCCACCCAACAGCCAAACACCACCA	-	intergenic_variant	MODIFIER	-	-	-	-
sv_10833	6	56737816	56737913	97	DUP:TANDEM	ACACCAGAACTCAGTCCACGTCCCAAAGCCCCGGTCAGGCTGGGGTTTCCAAAGGACCAGCTCGCCAGCTGATCCCACCCAACAGCCAAACACCACCA	ACACCAGAACTCAGTCCACGTCCCAAAGCCCCGGTCAGGCTGGGGTTTCCAAAGGACCAGCTCGCCAGCTGATCCCACCCAACAGCCAAACACCACCACCACCAAGCCCATTTAATAAAACGGGTCAAAGCCCTGAATGGACAAGTCCCTAATCCAGAGGCACACAGGGCCACTCGCAGCAGAAACAAAGGACCACCAGAACTCAGTCCACGTCCCAAAGCCCCGGTCAGGCTGGGGTTTCCAAAGGACCAGCTCGCCAGCTGATCCCACCCAACAGCCAAACACCACCA	-	intergenic_variant	MODIFIER	-	-	-	-
sv_10872	6	63171149	63171149	54	INS	C	CGGGTTACGGTACGGGTTAAGGTACGGTTTAGGGTACGGGTTAGGGTTAGGGTAT	-	intergenic_variant	MODIFIER	-	-	-	-
sv_10953	6	72674777	72674891	114	DUP:TANDEM	GCAACAAAGTAGATAAAGGAAAAGACTGTTAGAATTTCCTTAATGAATGCATAGTTACTGATATATGCCAGGGATATACATGCCAGGGACTCCTAGGCAGGTCATGGTTGGGCTT	GCAACAAAGTAGATAAAGGAAAAGACTGTTAGAATTTCCTTAATGAATGCATAGTTACTGATATATGCCAGGGATATACATGCCAGGGACTCCTAGGCAGGTCATGGTTGGGCTTCAACAAAGTAGATAAAGGAAAAGACTGTTAGAATTTCCTTAATGAATGCATAGTTACTGATATATGCCAGGGATATACATGCCAGGGACTCCTAGGCAGGTCATGGTTGGGCTT	-	intergenic_variant	MODIFIER	-	-	-	-
sv_10990	6	76539564	76539878	314	DEL	TCAAATGGATGCTTTCTTTTTTACATTTAAAAATTTTTTTATTATTTTTCTTTTTTTTTTTTTTTTTTTTTTGTCATTTCTAGGGCTGCACCCAAGGCATATGGAGGTTCCCAGGCTAGGGGTCTAATTGGAGCTGTAGCCACTGGCCTACACCAGAGCCACAGCAACACAGGATTTGAGCCATGTCTGCCACCTACACCACAGCTCACAGCAATGCTGGATCCTTAACCCAGTGATCGAGGCCAGAGATCGAACCCGAAACCTCATGCTTCCTAGACGACCTCATTAACCACTGTGTCATGAAGGGAACTCCCC	T	-	intergenic_variant	MODIFIER	-	-	-	-
sv_11042	6	82699020	82699079	59	DEL	GCTCTCTGAAATGCTGCCTCCCAGGCTACAGTCCTCATTTTGTCCCCAAATAAAACTTAA	G	-	intergenic_variant	MODIFIER	-	-	-	-
sv_11096	6	87237489	87237640	151	DEL	ACTTTCCTGAAATTCCGTGGTAATAAAAGAGACAAACGGACCAGGTCGCTCCAGAGAACCACCACCAAAGAAGTAATTTCTCTGCTCTAAGCGAGGATGCCAGTGGCAGAAGCACCTGTCCAGGTAATTCATCAGCCTCAGATGAATGGACT	A	-	intergenic_variant	MODIFIER	-	-	-	-
sv_11177	6	93319622	93319926	304	DEL	TTTAAAAAAAATAGGAGTTCCCATCGTGGCGCAGTGGTTAACGAATCCGACTAGGAACCATGAGGTTGCGGGTTCGATCCCTGCCCTTGTTCAGTGGGTTAACGATCCGGTGTTGCCGTGAGCTGTGGTGTAGGTTGCAGACGCGGCTCGGATCCTGCGTTGCTGTGGCTCTGGCGTAGGCCGGTGGCTACAGCTCCGATTGGACCCCTAGCCTGGGAACCTCCATATGCCGCGGGAGCGGCCCAAGAAATAGCAACAACAACAACAACAACAACAAGACAAAAGACAAAAAAAAAAAAAAAAAA	T	-	intergenic_variant	MODIFIER	-	-	-	-
sv_11295	6	107243474	107243769	295	DEL	AAAAAAAAAACAGGAGTTCCCGTCGTGGCGCAGTGGTTAACGAATCCGACTAGGAACCATGAAGTTGCGGGTTCGATCCCTGCCCTTGCTCAGTGGGTTAACGATCCGGCGTTGCTGTGAGCTGTGGTGTAGGTTGCAGACGCGGCTCAGATCCCGCGTTGCTGTGGCTCTGGCGTAGGCTGGTGGCTACAGCTCCAATTCGACCCCTGGCCTGGGAACCTCCATATGCCGAGGGAGCGGCCCAAGAAATAGCAAAAAAAAAAAAAAAAAAGACCAAAAAAATAAAACAAACAAAC	A	-	intergenic_variant	MODIFIER	-	-	-	-
sv_11335	6	111811345	111811580	235	DUP:TANDEM	TGACTGCACTTAACACTATTGAACTGCACACTTAAAAACTGCTAAATTGGCATCTACTAACTCCAAACTCCCAGTCCGTCCCATTTGGGGTTAGTAGATGCTAACTATTATGCTTAGAATGGATAAGCAAGGAGGTCCTACTGTACTGCACAGGGCACTATGTCCAATCTCTTGTGATTGAACATGATGGAAGATAATATGAGAAAAAGAATGCACATATATATATAACTGGGTCA	TGACTGCACTTAACACTATTGAACTGCACACTTAAAAACTGCTAAATTGGCATCTACTAACTCCAAACTCCCAGTCCGTCCCATTTGGGGTTAGTAGATGCTAACTATTATGCTTAGAATGGATAAGCAAGGAGGTCCTACTGTACTGCACAGGGCACTATGTCCAATCTCTTGTGATTGAACATGATGGAAGATAATATGAGAAAAAGAATGCACATATATATATAACTGGGTCAGACTGCACTTAACACTATTGAACTGCACACTTAAAAACTGCTAAATTGGCATCTACTAACTCCAAACTCCCAGTCCGTCCCATTTGGGGTTAGTAGATGCTAACTATTATGCTTAGAATGGATAAGCAAGGAGGTCCTACTGTACTGCACAGGGCACTATGTC…	-	intergenic_variant	MODIFIER	-	-	-	-
sv_11429	6	122339685	122339738	53	DEL	ACCTGTTGGTGTTCTCACACTCCTGGGAACACACCCACCCTGCTGCTGCCACTG	A	-	intergenic_variant	MODIFIER	-	-	-	-
sv_11708	6	145137140	145137308	168	DUP:TANDEM	ATCTGTAAAGACGATAAGACTAAATTCTAGTTACTAGATAATCCATGAGGTGCCTTCCAACTTTTTTTTACTTTTTTTAATTATTATTATTTTTTAATAGTTATTTCCCCAATACAATTTTTTTTCTACTGTACAGCATGGTGACGCAGTTACACATACATGTACACAT	ATCTGTAAAGACGATAAGACTAAATTCTAGTTACTAGATAATCCATGAGGTGCCTTCCAACTTTTTTTTACTTTTTTTAATTATTATTATTTTTTAATAGTTATTTCCCCAATACAATTTTTTTTCTACTGTACAGCATGGTGACGCAGTTACACATACATGTACACATTCTGTAAAGACGATAAGACTAAATTCTAGTTACTAGATAATCCATGAGGTGCCTTCCAACTTTTTTTTACTTTTTTTAATTATTATTATTTTTTAATAGTTATTTCCCCAATACAATTTTTTTTCTACTGTACAGCATGGTGACGCAGTTACACATACATGTACACAT	-	intergenic_variant	MODIFIER	-	-	-	-
sv_11837	6	151448179	151448179	103	INS	T	TGCATGGGAAGTAATTTGATGTAGTCTATGCAAGACACTCTTTCAGGCACAGACCAGGGTGAATAAGGGTGGAGAATGGGCATGAGGGGAAGTCTATCCCAAAA	-	intergenic_variant	MODIFIER	-	-	-	-
sv_11841	6	152084306	152084723	417	DEL	TAAAGAAAATATCCCTGGAGTTCCCGTCGTGGCGCAGTGGTTAATGAATCCGACTAGGAACCATGAGGTTGCGGGTTCGGTCCCTGCCCTTGCTCAGTGGGTTAACGATCCGGCGTTGCCGTGAGCTGTGGTGTAGGTTGCAGACGCGGCTCGGATCCCACGTTGCTGTGGCTCTGGCGTAGGCCGGTGGCTACAGCTCTGATTCGACCCCTAGCCTGGGAACCTCCATATGCCGCGGGAGCGGCCCAAGAAATAGCAACAACAACAACAACAACAACAAAAGACAAAAAAAAAAAAAAAAAATTAAGATTAGTATGGAGATCCAACATCTGCATAATAATGTTCAAAAGAGAATGAGCATAGAAAATGAAGAAAGAAATTCAATAAAAAAAAAAAAAA…	T	-	intergenic_variant	MODIFIER	-	-	-	-
sv_11982	6	159099077	159099170	93	DEL	TTAATGTTTATTTATTTATTTATTTATTTTTGTCTTTTTGTCTTTTGTTGTTGTTGTTGCTATTTCTTGGGCCGCTTTAACACGACGGAACTCC	T	-	intergenic_variant	MODIFIER	-	-	-	-
sv_12079	6	164401253	164401537	284	DEL	CAGAAAAGACTTTCGGAGTTCCCGTCGTGGCGCAGTGGTTAACGAATCCGACTAGGAACCGTGAGGTGGCGGGTTCGATCCCTGGCCTTGCTCAGTGGGTTAAGGATCTGGCATTGCCGTGAGCTGTGGTGTAGGTTGCAGACACGGCTCGGATCCTGCGTTGCTGTGGCTGTGGTGTAGGCCAGCAGCTACAGCTCCAATTGGACCCCTAGCCTGGGAACCTCCATATGCCACAGGAGCTGCCCAAGAAATGGCAAAAAGACAAAAAAAAAAAAAAAAAAAAAA	C	-	intergenic_variant	MODIFIER	-	-	-	-
sv_12205	7	2724447	2724564	117	DEL	TCCGGTCCACGGCAGCCTGCGGCAGCGGCGGCAGCTGCTGCTGCCGCTGCTGCTGCTGCTCCTCCTGCTCCTGCTCCTCCTCCCCCCCCCCCGCCGCTTCTCCTCCCCCTCCCCCTCC	T	-	intergenic_variant	MODIFIER	-	-	-	-
sv_12273	7	6399879	6400158	279	DEL	CAAGAAGTAGACATTTCCTTGGAGTTCCCGTCGTGGCGCAGTGGTTGACAACTCCGACTAGGAACCATGAGGTTGCGGGTTCGGTCCCTGCCCTTGCTCAGTGGGTTAACGATCCGGCGTTGCCGTGAGCTGTGGTGTAGGTTGCAGACGCGGCTCGGATCCCGCGTTGCTGTGGCTCTGGCGTAGGCCGGTGGCTACAGCTCTGATTCGACCCCTAGCCTGGGAACCTCCATATGCCGCGGGAGCGGCCCAAAGAAATAGCAAAAGACAAAAAAGAAAA	C	-	intergenic_variant	MODIFIER	-	-	-	-
sv_12394	7	11184260	11184260	57	INS	G	GCCAGGCAGCCCATGGCTTAGCTTGTCTACTAAGCGTTCCAATGATTTTGGACTAGAA	-	intergenic_variant	MODIFIER	-	-	-	-
sv_12406	7	11335783	11336241	458	DEL	CACAGCTCACAGCAATGCCAGATCCTTAACCCACTGAGCAAAGCCAGGGATCGAACCCGCAACCTCATGGTTCCTAGTCGGATTCGTTAACTACTGCGGGAACTCCTATGTTCACATTTATGATGTGGAAAGAGAGGATTCAGGAAGGCAAAGATCTACCGAAGCTTTTGTGTGGGAGGCGTTACCAGTTAACTAAAAGATTAGCAAGAGAAGCTTGGGAAAATCTACTCAGTGATTTATAATAACCTATACGGGAAAAAAAGAATGGATATACTTATATGTATGACTTATTCACTTTTCTGTACACCTGAAACATATGCAACACTTTTAATCAACTATTCTCCAATAATTTTTTTTTTTTTTTATCTTTTTAGGGTTGCCCCCTTGGCATGTGGAGTT…	C	-	intergenic_variant	MODIFIER	-	-	-	-
sv_12473	7	15358643	15358782	139	DEL	GCTGAGATTGCTTGGGGAAGGGGGCACATACCCTGTCTCCCCAGGGTGCTGAGGAAATGACAGGAGAGGGACCTGCTGGGGGTGAATGAAACCCAGAGAAGTCTGGTGGCTTCTCTCTCAGAACCTCTGAAACACAGTCC	G	-	intergenic_variant	MODIFIER	-	-	-	-
sv_12573	7	22070430	22071141	711	DEL	ATAGTTTCTAATAGTTTAACTAAAAAGTAGTGCTCCACTGTAATAAATATAATGTGTGTTGGAGTTCCCGTTGTGGCTCAGTGGTTAACGAATCCGACTAGGAAACCATGAAGTTGCGGGTTCGATCCCTGGCCTTGCTCAGTGGATTAAGGATCCGGCGTTGCCGTGAGCAGTGGTGTAGGTCGCAGACGCGGCTCGGATCTGGCGTTGCTGGGGCTCTGGCGTAGGCTGGCAGCTACAGCTCTGATTAGACTCCTAGTCTGGGAACCTCCATATGCCGCAGAAGCAGCCCTAGAAAAGGCCAAAAAAAAAAAAAATATATATATATATATATATATATATATATATATATATATAATGTGTGTATTTGTCTATACATATTTTTCAGAGTAGAGTTGG…	A	-	intergenic_variant	MODIFIER	-	-	-	-
sv_12811	7	38985762	38985923	161	DEL	AGGGGAGACACAGCCCTGCCTCAGGGAGCCCCAGTCTGAGTAGGGGAGACACAGCCCCGCCCTTCAGAGATTCTCAGGCTGAGGGGAGACACAGCCCTGCCTCAGGGAGCCCCAGGCTGAAGGGAGACACAGCCCTGTCCTCAGGGAGACCTAGTCTGAGTG	A	-	intergenic_variant	MODIFIER	-	-	-	-
sv_12838	7	41288854	41289180	326	DEL	TGATTTACAGTGTTGTTTTTTTTTGTTTTGTTTTGTTTTTTTGTCTTTTTGTTGTTGTTGTTGTTGTTGTTGTTGTTGTTGTTGTTGCTATTTCTTGGGCCGCTCCCTCGGCATATGGAGGTTCCCAGGCTAGGGGTCGAATCGGAGCTGTAGCCGCCGGCCTACACCAGAGCCACAGCAACGCGGGATCCGAGCCGCGTCTGCAACCTACACCACAGCTCACGGCAACACCGGATCGTTAACTCACTGAGCAAGCGCAGGGACCGAACCCGCAACCTCATGGTTCCTAGTCGGACTCGTTAACCACTGCGCCACGACGGGAACTCC	T	-	intergenic_variant	MODIFIER	-	-	-	-
sv_12877	7	43038042	43038111	69	DEL	AAGAGATTCTCCTATTATAATCATTGTTTGTTTTTGTTTTTGTGTGTGTGGTTTTTTTTTTGGTCTTTTT	A	-	intergenic_variant	MODIFIER	-	-	-	-
sv_12969	7	49860415	49860477	62	DEL	TTGTCTTGATATGTAAGATTAGAAAAGTAGTTCTCCTGTGGTGCACTGGGCTAAGGGTCCTGG	T	-	intergenic_variant	MODIFIER	-	-	-	-
sv_13063	7	57576151	57576216	65	DEL	AGACCGTAGCTGTGGGCTTGGAGTACCATTTATTGGGATCCATCTGGCCCTGTTGATTGAGGTGGG	A	-	intergenic_variant	MODIFIER	-	-	-	-
sv_13066	7	57923668	57923768	100	DEL	CCAGAGGAACCGCAGCGTGGAGAACACTGCATCCCGCCCCCGCCCCAAGGAGGTCATGGCTTCTCCACTGGGGGCCCCAGCCCGAAGGAAAAGACACCCTT	C	-	intergenic_variant	MODIFIER	-	-	-	-
sv_13196	7	73535647	73535750	103	DEL	GAAATGCAAATCAAAACCACAATGAGGTACCACCTCACACCAGCCAGAATGGCCATCATCAAAAAGTCTACAAACAATAAGTGCTAGAGAGAGGGTATGGAGAA	G	-	intergenic_variant	MODIFIER	-	-	-	-
sv_13324	7	85469925	85469925	54	INS	T	TGCTGTGAGGTTGCAGACGCGGCTCGGATCCCGTGTTGCTGTGGCCCTGGCGTAG	-	intergenic_variant	MODIFIER	-	-	-	-
sv_13331	7	85974567	85974859	292	DEL	ACCAGCTCAGCTTTTTTTTTTCTTTTTTTTTTTTTTTTTTTTTTGTCTTTTTGCTATTTCTTGGGCCGCTCCTGCGGCATATGGAGGTTCCCAGGCTAGGGGTCCAATCGGAGCTGCAGCCACCGGCCTACACCAGAGCCACAGCAACGCTGGATCCGAGCCACGTCTGCAACCTACACCACAGCTCACGGCAACACCGGATCGTTAACCCACTGAGCAAGGGCAGGGACCGAACCCGCTACCTCATGGTTCCTAGTCGGATTCGTTAACCACTGCGCCACGACGGGAACTCC	A	-	intergenic_variant	MODIFIER	-	-	-	-
sv_13397	7	91509425	91509528	103	DEL	TCTCCATTCAGGGCTCCTTACACAAGCTCTCATTTACCCCCTAGACCTCTTCTCATAATATTTAACATATAAGATGATAGCAAATGACTGGTCATTTGCTATGA	T	-	intergenic_variant	MODIFIER	-	-	-	-
sv_13502	7	99899041	99899331	290	DEL	GTGATTTTGTTTTCTTTTTTTCTTTTTTTTTTTTTTCTTTTGTCTTTTTGCTATTTCTTTGGGCCGCTCCCACGGCATATGGAGGTTCCCAGGCTAGGGGTTGAATCGGAGCTGTAGCCACTGGCCTACGCCAGAGCCACAGCAACGCGGGATCCAAGCTGCGTCTGCAACCTACACCACAGCTCACGGCAACGCCAGATCATTAACCCGCTGAGCAAGGGCAGGGATCGAACCCGCAACCTCATGGTTCCTAGTCGGATTCGTTAACCACTGCGCCACGACGGGAACTCC	G	-	intergenic_variant	MODIFIER	-	-	-	-
sv_13526	7	100929347	100930186	839	DEL	GGAGCTGTAGCTGCCGGCCTACACCAGAGCCACAGCAATGTGGAATCCGAACTGAGTCTGTGACCTACACCACAGCTCACGGCAACACCAGATCCTTAACCCACTGAGCAAGGCCAGGAACCGAACCCGCAACCTCATGGTTCCCAGTCGGATTCATTAACCACTGCAACACTACAGGAACTCCTAAAGAATAAAAAGAAATTTTAATGAACCATGCTGAAAGGAAAATTCAATTACCTTTTTAATTATTCACCATAAGATATTACAAAATCTTGTCTTACGGAAAGGTGATCAAAGATCATGTAGCCCCCCTGAAAGTAGGGAAAAAAAAACTTATTATGAAGATATATTGGGTAGTTGAATGATTATATTTTTTTCCTGGATGTTGTGATGTTTGTG…	G	-	intergenic_variant	MODIFIER	-	-	-	-
sv_13656	7	108434938	108435041	103	DEL	TGCCAACATATCCAGATCATTTTGTTAAAAAATCAACAGTGTGCCTGAATAACTCCAAGCATCTGGATATTTGTTAATAGATGTAGGGACAACCTCATGTTTTG	T	-	intergenic_variant	MODIFIER	-	-	-	-
sv_13679	7	109644568	109644880	312	DEL	CCTGGGTCCTCACCCATCTTCTGTACATGCATTCCTGTCTCTGGGTCCTCACCCATCTTCTGTACATGCATTCCTGTCTCTGGGTCCTCACCCATCTTCTGTACATGCATTCCTGTCTCTGGGTCCTCACCCATCTTCTGTACATGCATTCCTGTCTCTGGGTCCTCACCCATCTTCTGTACATGCATTCCTGTCTCTGGGTCCTCACCCATCTTCTGTACATGCATTCCTGTCTCTGGGTCCTCACCCATCTTCTGTACATGCATTCCTGTCTCTGGGTCCTCACCCATCTTCTGTACATGCATTCCTGTCT	C	-	intergenic_variant	MODIFIER	-	-	-	-
sv_13821	7	117034046	117034392	346	DEL	GATGGGGCTGTGGCTGTGGCCAGCAGCTGCAGCTCCAATTTGACCCCTAGCCTGAGAACCTCCATATGGCTGCAGGTGCAGCCCTGGAAATGGATGCTGAGTGGATGCCCAAAAGTTTAATCAACTGTCTCTGAAAGCAACTTTAACTTCCCTGAGATTGTTTCCTCATTTGTTAGAAAACATAATAACAATAATGAATCAACCCTACAATTCTTCATGGAGTTTTTGTAATGTCTACATGAGATTGTATATATAAAGCACTTTCCCCTGGACCTGGGATGCAGAATGTGGTGAATAAAACACTAGATTTAATTTTTTTTAAAATTTTTATGGCCACACCATGGCAT	G	-	intergenic_variant	MODIFIER	-	-	-	-
sv_13861	7	119789349	119789417	68	DEL	TGGGCTGCCCATGTCCTTGGAACAGCCCAGAGGCTGGGACCTCTTCAGCCACTCCTGTCTTTATCAAGA	T	-	intergenic_variant	MODIFIER	-	-	-	-
sv_13891	8	3598	3598	99	INS	G	GGCCAGAGCACACAAGGCCTTTTCAGGCCCCATCCACCTTCCCCTCAAAAGAGAGCACGTTTGGAGGTGTTTTCCATCTCCTCAGACCCCCAGCAGAGCA	-	intergenic_variant	MODIFIER	-	-	-	-
sv_13901	8	6614	6614	66	INS	T	TGAAGGAGAGCACGTTTGGAGGTGGTTTCCAGCTCCGGTGACCCTCAGCCAAGCAGCGGCGCACAGG	-	intergenic_variant	MODIFIER	-	-	-	-
sv_13902	8	6685	7353	668	DEL	TGGAGGCAGCCCAGACCCTCCTCGGCCGAAGGGCGAGCACAGGCCTAGGGGCGAAACCGGCAAGCGCTGCTTTGCTGAGCAAACACGCACTGGGGCTGAGCTTGCTTTCCCGAGGAGAGTTTCCCTTTCGAGAAGGCAGCTCCCAGAAGCTCGTTTTGTGCCCTTTCTGAGATGGGCCCTAGGTGGGTCCCTCCCTAGCAGGCGAAGGGTGGGGTGCTGGGGCCAGTGCACACAAGGCCTTTTCAGACCCCATCCGCCTTCTCCCTGAAGGAGAGCACGTTTGGAGGTGGTTTCCAGCTCCGGTGACCCTCGGCCAAGCACCGGTGCACAGGGAGCTGGAGGCAGCCCAGACCCTCCTGGCCGAAGGCGAGCACAGGCCTAGGGGCGAAACCGGCAAGC…	T	-	intergenic_variant	MODIFIER	-	-	-	-
sv_13905	8	7487	7487	130	INS	G	GGCAGCACAGAACCTCCTTGGCCCTAAGGCAAGCAGAGACCTAGGGGAGAAACCGGAAAGCGCTGCTTTCCTGAGCAAACACGCATTGGGGCTGAGCTTGGTTTCCCGAGGAGAGTTGCACTTTCGCGAAT	-	intergenic_variant	MODIFIER	-	-	-	-
sv_13906	8	8155	8155	130	INS	G	GGCAGCACAGAGGCTCCTTGGCCCTGAGGCAAGGAGAGACCTAGGGGAGAAACCGGACAGCGCTGCTTTCCTGAGCAAACACGCATTCGGGCCTAGCTTGGTTTCCCGAGGAGAGTTGCACTTTCGCGAAT	-	intergenic_variant	MODIFIER	-	-	-	-
sv_13909	8	9157	9157	130	INS	G	GGCAGCACAGAACCTCCTTGGCCCTAAGGGAAGCAGAGACCTAGGGGAGAAACCGGAAAGCGCTGCTTTCCTGAGCAAACACGCATTGGGGCTTAGCTTGGTTTCCCGAGGAGAGTTGCACTTTCGCGAAT	-	intergenic_variant	MODIFIER	-	-	-	-
sv_14006	8	6406407	6406464	57	DEL	ATATGCCACGGGCATGGCCCTAAAAAGACAAAAAACAAAAAAGAAAAGAAAGAGACAG	A	-	intergenic_variant	MODIFIER	-	-	-	-
sv_14024	8	7901613	7901696	83	DEL	GATTAACTATATATATATATATATATATATATATATATTTAAGGTGTACATATGCTGTTTTGATATAAATATATTTGTTTAATA	G	-	intergenic_variant	MODIFIER	-	-	-	-
sv_14341	8	26216619	26216913	294	DEL	TTATTTTTCTTTTTTTTTTTTTTTTCTTTTGTTCTTGTTGTTGTTGTTGTTGTTGCTATTTCTTGGGCCGCTCCCGCGGCATATGGAGGTTCCCAGGCTAGAGGTTGAATCGGAGCTGTAGCCACCGGCCTACGCCAGAGCCACAGCAACGCGGGATCCGAGCCGCGTCTGCAGCCTACACCACAGCTCACGGCAACGCCGGATCGTTAACCCACTGAGCAAGGCCAGGGACCGAACCCACAACCTCATGGTTCCTAGTCGGATTCGTTAACCACTGCGCCACGACGGGAACTCC	T	-	intergenic_variant	MODIFIER	-	-	-	-
sv_14369	8	28083387	28083442	55	DEL	ATTGTTTCAATTAATGTCTCAAATTGTCTTCCTAGAAGAGAATTGTTCATGTCTGT	A	-	intergenic_variant	MODIFIER	-	-	-	-
sv_14487	8	35510465	35510546	81	DEL	TATCTGTTTATATATTTATATATACGCACATATCTGTTTATATATTTATATATATGTCAATTATATATATATTTAGAGCTGC	T	-	intergenic_variant	MODIFIER	-	-	-	-
sv_14491	8	35729487	35729624	137	DUP:TANDEM	AAACATAAAATGAAAGGAAATCATCTAACCCAAAAAAGAAAGGAACAAAGGAGAAACAGAATCAACTGGAAAACAAGGCTTAAAATGGCAATAAATACACATATATGAATGATTACCTTAAAATCAATGGCCTGAATA	AAACATAAAATGAAAGGAAATCATCTAACCCAAAAAAGAAAGGAACAAAGGAGAAACAGAATCAACTGGAAAACAAGGCTTAAAATGGCAATAAATACACATATATGAATGATTACCTTAAAATCAATGGCCTGAATAAACATAAAATGAAAGGAAATCATCTAACCCAAAAAAGAAAGGAACAAAGGAGAAACAGAATCAACTGGAAAACAAGGCTTAAAATGGCAATAAATACACATATATGAATGATTACCTTAAAATCAATGGCCTGAATA	-	intergenic_variant	MODIFIER	-	-	-	-
sv_14559	8	40952846	40953222	376	DEL	TTTTTTTTTTTTTTCTTTTTTTTTTTTTTTTTTTGGTCTTTTGTCTTTTTGTCTGTTGTTGTTGTTGTTGCTGTTGTTGCTATTTCTTGGGCCGCTCCTGCGGCATATGGAGGTTCCCAGGCTAGGAGTTGAATCGGAGCTGTAGCCACCGGCCTACGCCAGAGCCACAGCAACGCGGGATCCGAGCCGCGTCTGCAACCTACACCACAGCTCACGGCAACGCCAGATCCTTAACCCACTGAGCAAGGCCAGGGATCCAACCCGAAACCTCATGGTTCCTAGTTGGATTCGTTAACCACTGCGCCATAATGGGAACTCCCAGTTTTGCTAATCTTTAAAAATAACTCCCTCTTTTTTCTTTTTTC	T	-	intergenic_variant	MODIFIER	-	-	-	-
sv_14567	8	41173703	41173917	214	DEL	GAATATATATATATATATATATATATATATATATATATGACTGGGTCACTTTGCTGTACAGCAATATATATATATATGACTGGGTCACTTTGCTATACAGCATAAAATGGCACAACATTGCATAGTATGGTACAACTATAATATGAATAAATAAATAAATAAACCCAATAAAACCAAAGCTATTGCTTTACTTTTTTTTTTTTTCTTTACTTTTT	G	-	intergenic_variant	MODIFIER	-	-	-	-
sv_14858	8	76730804	76731082	278	DEL	TCCATGACCTGTTTTTTTTTTGTTGTTGTTGTTGTTGCTGCTATTTCTTGGGCCGCTCCCGAGGCATATGGAGGTTCCCAGGCTAGGGGTTGAATCGGAACTGTAGCCACCGGCCTACGCCAGAGACACAGCAACGCGGGATCCGAGCCGCGTCTGCAACCTACACCACAGCTCACGGCAACGCCGGATCGTTAACCCACTGAGCAAGGGCAGGGACCGAACCCGCAACCTCATGGTTCCTAGTCGGATTCGTTAACCACTGCGCCACGATGGGAGCTC	T	-	intergenic_variant	MODIFIER	-	-	-	-
sv_15017	8	93992059	93992131	72	DEL	GAGGTCTCGGTGCCCAGCCCCCACCCAGGCGGCGCCCCCCCAGCCCTTTCTCGGGGACTAACCTTCTGCGGCA	G	-	intergenic_variant	MODIFIER	-	-	-	-
sv_15194	8	109985050	109985050	66	INS	A	ACTGGTGCATATGGGAGCTCGTGGACGTTCTCTCAGTGAATCCAGAGACAAGGTGAGAATGAGGGTG	-	intergenic_variant	MODIFIER	-	-	-	-
sv_15269	8	115053425	115053478	53	DEL	TTCTTGGTAGTTAAATATGTATGTATGAGGGAAGTAATCATCCCCAAGAGCTCC	T	-	intergenic_variant	MODIFIER	-	-	-	-
sv_15299	8	117465554	117465842	288	DEL	ATTTATTTATTTTTTTGTCTTTTGTCTTTTTGTTGTTGTTATTTCTTGGGCCGCTCCCGCGGCATATGGAGGTTCCCAGGCTAGGGGTTGAATCAGAGCTGTAGCCACCGGCCTACACCACAGCCACAGCAACGCGGGATCCGAGCCGTGTCTGCAACCTACACCACAGCTCACGGCAACGCTGGATTGTTGACCCACTGAGCAAGGGCAGGGACCGAACCCGCAACCTCATGGTTCCTAGTCGGATTCATTAACCACTGTGCCACGACGGGAACTCCAGATTTTTTTT	A	-	intergenic_variant	MODIFIER	-	-	-	-
sv_15396	8	122951209	122951607	398	DEL	AATTTCACAGAATGTATAACGAACAGATATTTATTGTCCTGCTAATTAATGACAGATACTCTGCTAAACACTCAGGATTTATGAATGGACAAGACACAGACCCTGCCATCACAGAATTGACAGTATGGTGTGGAAGATAGAAAATTAAAATATGCAATTATGGTGCTACATGGCAACTTAAACAATGGAGAACAGCACAGTGTACCATAGAAATTCAGAGGAAAGGAAATACACCTGGACACAAAAAATCATGAAAGGCTCCACAGGAATGTGACATCTCTGCCTTTCTTATCTTTAACATGCAGTTAATTTAATATGGACTTTGTAGAAATATTTTAAGCAGCAAGTAAACCAATGTGCCAGAAATTACGAGTATGGGACTTGGCACAAAATAATTAT	A	-	intergenic_variant	MODIFIER	-	-	-	-
sv_15405	8	123241418	123241539	121	DUP:TANDEM	TCTTATTTTTTGTTTATATTTTTAAACATTTTAAAATTGAAGTATGGTTAATTTACAATAGGGTATTATTATCAAGTGTATAGCAAGGTGGTTCAGTTATATATGTATGTGCATATGTGTGT	TCTTATTTTTTGTTTATATTTTTAAACATTTTAAAATTGAAGTATGGTTAATTTACAATAGGGTATTATTATCAAGTGTATAGCAAGGTGGTTCAGTTATATATGTATGTGCATATGTGTGTCTTATTTTTTGTTTATATTTTTAAACATTTTAAAATTGAAGTATGGTTAATTTACAATAGGGTATTATTATCAAGTGTATAGCAAGGTGGTTCAGTTATATATGTATGTGCATATGTGTGT	-	intergenic_variant	MODIFIER	-	-	-	-
sv_15542	8	129907996	129907996	92	INS	G	GAAAGGACTTGCTAGATTCTAGGCAGTCAGGGAACTCCTCATGACATTTGAGTGACACTTAACGCAGGTGGATGAAGAAGGGAAGAGTGTTCC	-	intergenic_variant	MODIFIER	-	-	-	-
sv_15644	8	134638603	134638905	302	DEL	TTAAAGTTATCACACCAGGAGTTCCCATCGTGGCGCAGTGGTTAACGAATCCACTAGGAACCATGAGGTTTCGGGTTCGGTCCCTGCCCTTGCTCAGTGGGTTAAGGATCTGGCGTTGCCGTGAGCTGTGGTGTAGGTTGCAGACGCAGCTCGGATCCCGCGTTGCTGTGGCTCTGGCGTAGGCTGGTGGCTACAGCTCCGATTCAACCCCTGGCCTGGGAACCTCCATATGCCGCGGGAGCTGCCCAAGAAATAGCAACAACAACAACAAAAAAATAAAAATAAAAAAAA	T	-	intergenic_variant	MODIFIER	-	-	-	-
sv_15682	8	136611685	136611888	203	DEL	AATCCACAGGGCTGACGTTGCATTCAAGCCCGCCCATGCTCCCGGGGGCACCCCAGCCTGGCGAGAAGAGGGTTCAGCGCGGGGGCCACCACCCCTGCGAAAGGCCACCCGGCGGCGGCGTCCTGGCCTCCAGATGTGCTCGCTGCTCAGTACTGCCCCCTCCCGGACGACCCTGACTCGCTCTTAGCATCACCACCTGCGTGG	A	-	intergenic_variant	MODIFIER	-	-	-	-
sv_15936	9	13725992	13726044	52	DEL	TGCACAGAAGAGGCACACAGTCTGGCAGGGGGTGGGGGGGGTGGGGGGGATGG	T	-	intergenic_variant	MODIFIER	-	-	-	-
sv_15959	9	14989887	14989978	91	DEL	TGGGACCTATCCAGAGTAATTTCACTTGAAAGTTGTAATATATGGTTCCAGAATATAGGCTCGCTTGTATTGGAGGTCAGTACCACCTTGTC	T	-	intergenic_variant	MODIFIER	-	-	-	-
sv_16365	9	38830494	38830544	50	DEL	TTCCTTGCGGTACCTATAATGACTTTTTGTAACTTTGGTTACAAAATAGGG	T	-	intergenic_variant	MODIFIER	-	-	-	-
sv_16424	9	43666609	43666918	309	DEL	TAAAGAGTCCCATTTGAGGAGTTCCCGTCGTGGCGCAGTGGTTAACGAATCCGACTAGGAACCATGAGGTTGCGGGTTCGGTCCCTGCCCTTGCTCAGTGGGTTAACGATCCGGCGTTGCCGTGAGCTGTGGTGTAGGTTGCAGACGCGGCTTGGATCCCACGTTGCTGTGGCTCTGGTGTAGGCCAGTGGCTACAGCTCCGATTCAACCCCTGGCCTGGGAACCTCCATATGCCGCGGAAGCGGCCCAAGAGATAGCAACAACAACAACAACAAAAGACAAAAAAGACAAAAAAAAAAAAAAAAAAAAA	T	-	intergenic_variant	MODIFIER	-	-	-	-
sv_16651	9	63304393	63305390	997	DUP:TANDEM	GGGCCCGAGTCGCCCGGGAGAGCTGGTCAACCCCGCAGGCACTGGAGCACGGCCCCAGGTCGGCCGGGACATCTGGTCGAGCCTGCAGGCCCTCAGGCATGGGCCCGAGTCTCCCAGGAGAGCTGGTCGACAATGTGGGCCATCGACCGGAGCGCGAGTCGCCTGGGAATGCTGGTGAACCCTGCGGGACCTCGGAACCGAGCTCTAGTCGCCCGGGAGAGCTGGTGGACCACGCGGGACCTCGGACCATAACCCGAGAAGCCCGGGACATCTGGTCGACCCCACGGGACCTCGGACCCCAGCGCGAGTCGCCCAGCAGAGCTGGACGACACCGTGGGCCCTCGGACACTGGCCTGAGTCGCCCGGGAGATCTTGTTGAAACCACTGGCTATCACAGCC…	GGGCCCGAGTCGCCCGGGAGAGCTGGTCAACCCCGCAGGCACTGGAGCACGGCCCCAGGTCGGCCGGGACATCTGGTCGAGCCTGCAGGCCCTCAGGCATGGGCCCGAGTCTCCCAGGAGAGCTGGTCGACAATGTGGGCCATCGACCGGAGCGCGAGTCGCCTGGGAATGCTGGTGAACCCTGCGGGACCTCGGAACCGAGCTCTAGTCGCCCGGGAGAGCTGGTGGACCACGCGGGACCTCGGACCATAACCCGAGAAGCCCGGGACATCTGGTCGACCCCACGGGACCTCGGACCCCAGCGCGAGTCGCCCAGCAGAGCTGGACGACACCGTGGGCCCTCGGACACTGGCCTGAGTCGCCCGGGAGATCTTGTTGAAACCACTGGCTATCACAGCC…	-	intergenic_variant	MODIFIER	-	-	-	-
sv_16661	9	63377148	63377148	149	INS	C	CCCGCGGGCCCATGGACCCGAGCACGAGGCGCCTGGGACAACTGGTGGACACCACGGGCCCTCGGACGGAAGCGCGAGTCCCCGGGAGAGCTGGTGAACA	-	intergenic_variant	MODIFIER	-	-	-	-
sv_16664	9	63379162	63379162	161	INS	T	TAGTCGCCCGGGAGAGCTGGTCGACCTCGCGGGCCCTCGGAACAGGGCCCGGAAGACTGGGACAGCTGGTCGATCCCGCGGGCCCTCGGACCCGAGTGCC	-	intergenic_variant	MODIFIER	-	-	-	-
sv_16666	9	63381494	63381647	153	DUP:TANDEM	AAGCCTGAGTCGCCCGGGATAGCTGGTCAACACAGCGGGCCCAGGGATACGGGCCCGAGTTACCTGGACTGCCTGTCGACCCCGTGGACTATCGGAACTGAGCGCAAGTCGCCCGGGAGAGCTGGTCCACCCCGCGGGCCATCGGACCCG	AAGCCTGAGTCGCCCGGGATAGCTGGTCAACACAGCGGGCCCAGGGATACGGGCCCGAGTTACCTGGACTGCCTGTCGACCCCGTGGACTATCGGAACTGAGCGCAAGTCGCCCGGGAGAGCTGGTCCACCCCGCGGGCCATCGGACCCGAGCCTGAGTCGCCCGGGATAGCTGGTCAACACAGCGGGCCCAGGGATACGGGCCCGAGTTACCTGGACTGCCTGTCGACCCCGTGGACTATCGGAACTGAGCGCAAGTCGCCCGGGAGAGCTGGTCCACCCCGCGGGCCATCGGACCCG	-	intergenic_variant	MODIFIER	-	-	-	-
sv_16669	9	63389314	63389314	99	INS	A	AGCTGGTTGACCCCACGGGCAATCAGAGCCGGGCGCGAGTCCTCTGGCACAGCTGGTCGACACCGTGGTCCCACTATTGGAGCGCGAGTTGCCCTGGAGT	-	intergenic_variant	MODIFIER	-	-	-	-
sv_16678	9	63393865	63393865	101	INS	G	GACCCACCCAGGGCCTCGGAACCGGGCGTGATACTTGCGGGAGAGCTGGTCGACCCCGTGGGAACACAGACCTGTTCCCGAGTCGCCCGGGACAGCTGGTCA	-	intergenic_variant	MODIFIER	-	-	-	-
sv_16679	9	63394838	63394838	99	INS	T	TAGTCACCTGGGACAGCTGGTCGACCCGCGGGCCCTTGGACATGAGTCTGAGTCGCCCAGGAGTGTTACTCGACACCACTGACCCTCGTGCCCGAGCCAG	-	intergenic_variant	MODIFIER	-	-	-	-
sv_16768	9	70307419	70307419	84	INS	A	AAAACACCAAAATTCATCAGTTCCAAATGAATATCCCTAGCTTGACCTTTCACCTGAGCTCCAGCCTATTACATCTAACTATCCT	-	intergenic_variant	MODIFIER	-	-	-	-
sv_16792	9	72855044	72855044	67	INS	A	AAATGTATTAGTGAACTCTGGGAAGTAAAAAAGCCTAATTATGAAAATCTACTTTAAAAGATGTTTAT	-	intergenic_variant	MODIFIER	-	-	-	-
sv_16824	9	76892984	76893258	274	DEL	CAAAATGTCCAATAGGGAGTTCCCGTCATGGCGCAGTGGTTAACAAATCTGACTAGGAACCATGAGATTGCGGGTTCGGTCCCTGCCCTTGCTCAGTGGGTTAACGATCCGGCATTGCCGTGAGCTGTGGTGTAGGTTGCAGACGCGGCTCGGATCCCGCGTTGCTGTGGCTCTGGCATAGGCTGGCAGCACAGCTCTGATTCGACCCCTAGCCTGGGAACCTCCTTATGCTGCGGGAGCGGCCCAAAGAAATAGCAAAAAAAGACAAAAAAAAA	C	-	intergenic_variant	MODIFIER	-	-	-	-
sv_16963	9	94029030	94029340	310	DEL	ATGAGGCTCCTCTTTTTTTTTTTTTTTTTTTTTTTTTTTTTAGTTTTTTTTTTTGTCTTTTGTTGTTGTTGCTATCTCTTGGGCCGCTTCCGCGGCATATGGAGGTTCCCAGGCTAGGGGTTGAATCGGAGCTGTAGCCACCGGCCTACGCCAGAGCCACAGCAACGCGGGATCCGAGCCGCGTCTGCAACCTACACCACAGCTCACGGCAACGCCGGATCATTAACCCACTGAGCAAGGGCAGGGATCGAACCCGCAACCTCATGGTTCCTAGTCGGATTCGTTAACCACTGCGCCACGACGGGAACTCC	A	-	intergenic_variant	MODIFIER	-	-	-	-
sv_17003	9	97679980	97680306	326	DEL	TCAGACAGACTTCATTTTTTTTTATTATTTTTTTTTTATTTTTTTTTTTTTTTGTCTTTTGTCTTTTGTCTTTTTGTTGTTGTTGTTGCTATTTCTTGGGCCGCTCCCATGGCATATGGAGGTTCCCAGGCTAGGGGTTGAATTGGAGCTGTAGCCACCGGCCTACGCCAGAGCCACAGCAACGCAGGATCCGAGCCGCGTCTGCAACCTACACCACAGCTCACGGCAACGCCGGATCGTTAACCCACTGAGCAAGGGCAGGGACCGAACCCGCAACCTCATGGTTCCTAGTCGGATTCGTTAACCACTGCGCCACGACGGGAACTC	T	-	intergenic_variant	MODIFIER	-	-	-	-
sv_17018	9	99850264	99850387	123	DEL	GTGACAATGCTGAGTTCTTAGTTGCTAGCTACCAGGGATCTCTTGAAGTTACTTTTTTTAAGAAAGAGGAAATAAATTTTATTTTTAAATTTATAAGCTTGACTTATAACTATTTAGATGTGTA	G	-	intergenic_variant	MODIFIER	-	-	-	-
sv_17096	9	106689717	106689783	66	DEL	ATATGAAGTTCCCAAGCGAGGGGTAAAATCAGAGCTGTAGCTCCCAGCCTCTGCCACAGCTACAGCT	A	-	intergenic_variant	MODIFIER	-	-	-	-
sv_17162	9	110049054	110049333	279	DEL	AGTGAAGAAAAACACATCAAAACACACTCCATGGGTCCTGCTCAATGTGTTATTAAATGTAAGGCACCCAGCTCATAGCAGTTGCTCAATAAATGCCAGCTGCCTTCTACCACTAATCCTAAACTGAATTGTTGCTTTTATTTTTGTTTAAAAAGATGATATAATCAGTCTTCATTATTCTCAGATTTCCATATTTGCAAATCTGGCTACTTGCTGAAACTCATTTGTAACCTTCAATTGATAATCACAGTGTTTTTATGTTGTTCATGCACATGGAAAT	A	-	intergenic_variant	MODIFIER	-	-	-	-
sv_17182	9	111876581	111876869	288	DEL	TTTTTTGTCTTTTGTCTTTTTGTTTTTTGTTGTTGTTGTTGTTGTTGCTATTTCTTGGGCCGCTCCTGCGGCATATGGAGGTTCCCAGGCTAGGAGTTGAATCGGAGCTGTAGCCACCGGCCTACGCCAGAGCCACAGCAACGCAGGATCCGAGCCACGTCTGCAACCTACACCACAGCTCACGGCAACGCCGGATCGTTAACCCACTGAGCAAGGGCAGGGACCGAACCCGCAACCTCATGGTTCCTAGTCGGATTCGTTAACCACTGCGCCACGACGGGAACTCCTC	T	-	intergenic_variant	MODIFIER	-	-	-	-
sv_17184	9	112150546	112151558	1012	INV	ATGAGATACACAACTTTCTATATCATTTTACTAGTGCCTAGACTCCAGGGCAATTTCTTGCTATGTTCATCCTTAATCTTACTTCCTGACAATAGCACATGCTATCTAATTTTACAAACTTAGTAATAACATATTGTACTTTAATCTTATTTATCTTTACAATTGTTCTAAGTTTCAACCTTTTCTGTGGAGCCCTCCCTCTTATACTTCTCCCAAATAAGTAAATCAGCAAATTAATCTTAAAATAAGTTAATCTATTGGCACAAATTAATTAATCTGTGTGGATTCTGAATTTGGATTTTTCATTCTTGCCCATGAAATGCTACTTTTATAGTTATTTGTTCAAATATCTATTGCTAATATTAAAAAGCAAATTGATTATTCATGAAGTATCTTTTT…	ACAGCCCCCAAAAGAAGAAAAAACAAAACAAGCAAAAAAAACAAACAAAAAAGATATCACTACTTTTACTTTCAATATTCTAAAATACACTGTAACAGGAAGGCCAGACTTGTTTTATTTTCTAATGTATTAACATACTATAGAAATATGCCTGGGTATAGAAATGCTAAATAATCATGTGATAGTGAATGAATTTTATCTTTGATTGAGGAACATTAAAGATAAATTTCCTATTTATTATTACACATCATAGGAATATCATTTTTAATTTTTAGGGTAAATTGTTTAGCACTTTATTACTTTTGTTATCAAAAGAGAAAACAGTAATCAAGCTGTGAAAATATCCCTAACTAATTTGCAGAGCAATAATACAAAACCCAAAGTATATTCACTAATAGG…	-	intergenic_variant	MODIFIER	-	-	-	-
sv_17294	9	119633671	119633671	65	INS	T	TGGATTTTTAATTGTTTCAAAGAGAAACTTGGAAGTGGAAGTCCTGGGGTTTGGAGGGGTTTGGAG	-	intergenic_variant	MODIFIER	-	-	-	-
sv_17460	9	128678291	128678346	55	DEL	ACTGTGCCAGGCCAGGGACTGAACCAGCATCCCGGACTGCAGAGATGCCGCCAATC	A	-	intergenic_variant	MODIFIER	-	-	-	-
sv_17696	10	3545560	3545613	53	DEL	CAAACATGGTAGCTTTGTAAGACTTTTTTTTTTTTTTTTTTTTAGCAGTAAGGG	C	-	intergenic_variant	MODIFIER	-	-	-	-
sv_17720	10	4499811	4500618	807	DEL	CCCCTTTGAAATATTTCTTCAGAAAATAATTACAAGATTTAAATGAAGAAATCAGTATCTAAAAATAGTTTGAAAAAGAAGACTATTCTGAGATGGCTCACCTTATCAGATATTAATATTTGTTACAAAATTATTATATTTAATGTTGCTTTGTTACCTTGTGGATTTACCAATTAAAATATGGATCATTATAGAAACTCCAGAAAGAGATGAACATGTAATGAACCTTGCTGTACAACAATGATAATATCGCAAATCTTTAAAATAATCGTTGTGCAACAATTGCTGCAATATCTATAAGGGGATGAAAGAGAAATTTGGTCCTTACTTTGCACTATACACAAAATTCAATTCTAGATAAACTGAAAGATTAAAACTAAAGTCAGGTGAAGAAATATT…	C	-	intergenic_variant	MODIFIER	-	-	-	-
sv_17809	10	9469476	9469594	118	DEL	CATATATATATATACACACATATATATATATGTTTAAAACACACACACACATATATATGTTTAAAATACACACATATTATATATATGTTTAAAACATATATATATATATATGTGTGTAT	C	-	intergenic_variant	MODIFIER	-	-	-	-
sv_17818	10	9876698	9876772	74	DEL	AAAAAAAAAAAAAAAATCACAAAATAGATCCACCTCTTTCACGTTACAGCTTAGCCCATGTATTTTGCTGACTTC	A	-	intergenic_variant	MODIFIER	-	-	-	-
sv_17839	10	10821999	10822302	303	DEL	GCTTTTCTTTTTTTTTTTTTTTTTTTTTTTTTTGTCTTTTTTGTTGTTGTTGTTGTTGTTGCTATTTCTTGGGCCGCTCCCGCGGCATATGGAGGTTCCCAGGCTAGGGGTCCAATCGGAGCCGTAGCTGCCAGCCTACACCACAGCCACAGCAACGCGGGATCCGAGCCGCGTCTGCAACCTACATCACAGCTCACGGCAACGCCGGATCGTTAACCCACTGAGCAAGGGCAGGGACCGAACCCGCAACCTCATGGTTCCTAGTCGGATTCGTTTAACCACTGCGCCACGACGGGAACTCCGT	G	-	intergenic_variant	MODIFIER	-	-	-	-
sv_17886	10	13016507	13016802	295	DEL	TTAAAAAGGCCAAGGGTGGAGTTCCCGTCGTGGCGCAGTGGTTAACGAATCCGACCAGGAACCATGAGGTTGCGGGTTCGGTCCCTGCCCTTGCTCAGTGGGTTAAGGATCCAGCGTTGCCGTGAGCTGTGGTGTAGGTTGCAGATGCGGCTCAGATCCCGCGTTGCTGTGGCTCTGGCGTAGGCCAGTGGCTACAGCTCCGATTGGACCCCTAGCCTGGGAACCTCCATATGCCGCGGGAGCAGCTCAAAGAAATAGCAAAAAAAAAAAAAAAAAAAAGACAAAAAATAAATAAA	T	-	intergenic_variant	MODIFIER	-	-	-	-
sv_17945	10	15948949	15949336	387	DEL	ACCTTTCAGACCAGAAGGCACTGAAACTGACATATATCAAGTGTTGAAAGAAGAAAACTGTCAAACAAGAATTCCATAGCTGCAAAACTGTCCTTCAAAAATGAGGAAGAATTAAGATCTTCTCAGTCAAACAAAAGCTGAGAGGGTTTGTCACTACTAGACCTGCCCTACTTTCTCGGCTAAGAGAGGCTTTCAGGTTGAAATGAATGCACGGTTATTGTTTAATGGGTATAGAGTTTCCTTTTTCTTTTTCCTTGTCTTTCCTCCTTTCTTCCTTCTTCCTTCCTTCCTTCCTTCCTTCCTTTTTCATGGTTTCTCTTCTTAGGGCTGCACCTGAAGCATATGGAAGGTCCCAGGCTAGGGGTCCAATCGGAGCTGTAGCCGCCGG	A	-	intergenic_variant	MODIFIER	-	-	-	-
sv_17983	10	17530327	17530936	609	DEL	CAGCTGTCGGCCTACACCACAGCCACAGCAATGCCAGATCCAAGCCGTGTCTGCTGCCTACACCACAGCTCATGGCAATGCTGGATCCTTAACCCACTGAGCGAGGCCAGGGATCGAACCTGCATCCTCATGGATACTAGTCAGTTTCTTAACCTGCCGAACCACAACCGGAACTCCCTCTGATTGTTTTCTTTTATGCGGGATGATCTCCAGCTCTTGCTCTGTGACCTTCTCTCCCTCTTCCCAGTATAGTCACATCAAAACTTGTGTTAAATCAATATTTACAATTTAAATTATTATGACTGTATATAGTTCAGAACTAATTAAATTTTCTTTCCTGCACAGTTTTTCCTAGTTATTGCCTCCTTGTTTTATATACTTAATTTGCTTGTGCTTACC…	C	-	intergenic_variant	MODIFIER	-	-	-	-
sv_18144	10	26776671	26777455	784	DEL	CCACTGAGCAAGGCCTGGGATCGAACCCGAGTCCTCATGGATGATTGTTAACCCCTGAGCCACCAGGACGGGAACTCCCTAGTCAGGTGATTTTTTTCATATGGTCATCATGTTACACACACTCACCACTATTTCATTCCAGACCATGTTTATCACCCTAAAAAGATACCCCATAGTCATTAACAGTCACTGATCATTCCCCCTCACCCCAGCCCCTAGTAAGCATTCATCTATCTTCTGTCTCTGTGGATTTGCCTTTTGAGACATTTCATATGAAAAGAAGTATACAATATGTGGTCTTTTGTGTCTGGCTTCTTTCATTGACCAGAATGCTTTCGGGCTTTGTCCACATTATAGCAGGGTATTGGTACATTATTTCTTTTTGGGGGGGTACTGTGT…	C	-	intergenic_variant	MODIFIER	-	-	-	-
sv_18151	10	28015637	28015959	322	DEL	GTTGCTATGAGCTGTGGTGTAGGTTGCAGAGGCAGCTCAGATCCCCTGTTGCTGCTGAGGTTGTGGCATATATTTGCAGCTGCAGCTCTGATTCAACCCCTAGCCTGGGGACTTCCACATGCTTCAGGTTTGGCCCTAAAAAACAAACAAAGAGTAGAGAGGATTTCCTGGGGTCATTTAGAAAATATGCAATCCTGGTAGCTCTTTAAGAAGTACCACTCCTGGGAGTTCCTGTCACGGCTCAGTGGTTAGCGAATCCAAATAGGAACCATGAGGTGGCAGGTTCAATCCCTGGCCTCGCTCAGTGGGTTAAGGATCCGGCT	G	-	intergenic_variant	MODIFIER	-	-	-	-
sv_18303	10	39868450	39868534	84	DEL	TGGTCTGCTGGGTTTGCGAGCGTAACAAAATTCAAAGTTTCAGACTTCCAGCTGTGGAGCAATGGGACTGGGGGGAGTGGGGGGG	T	-	intergenic_variant	MODIFIER	-	-	-	-
sv_18325	10	40629097	40629182	85	DEL	AGGTTGCCAGGCTAGGGGTCTAATCAGAGCTGTAGCGGCCGGCCTGCGCCCGAGCCACAGCAACGCAGGATCCAAGCCGTGTCTGC	A	-	intergenic_variant	MODIFIER	-	-	-	-
sv_18334	10	41473298	41473926	628	DEL	GTTTTTGCAGACATCCAGGGCTGAATGTTGCTTTTTTTTTTTTTTCTTTTTACAGAAAAAACTCTCTAAGAATGGCCTTGGCTGCATCCCACAGATTTTGCATTGTTGTGTTTTCAATGTCATTTGTTTCAAGGTTCTTCTCCTTCTCTCTTCCTCTCATTCTGTGCACCCCCCCCCCTTTTTTTCCTTTTAGGGCTACACCCAGGGCGTTTGGAGGTTCCCAGGCTAAGGGTCAAATCAGAGCTACAGCTGCTGGCCTACGCCACAGCCACAGCCACGCGGGATCTGTAACCCACTGAGCTAGGCCAGGGATTGAACCCACATCCTCAGGGATCCTCCTCGGGTTTGTTACTGCGGAGCCAGGACAGGCCCTCCTTTTTCTTCTTTTCACTTCTGCAT…	G	-	intergenic_variant	MODIFIER	-	-	-	-
sv_18505	10	49437150	49437150	75	INS	A	ACTTCCTGGAGAACCATTTATTCATCTTTCAATCAATTCAAGTTTCCCCACTTAGGCAAAATCTAGATATTTTTCT	-	intergenic_variant	MODIFIER	-	-	-	-
sv_18723	10	64426180	64426180	96	INS	T	TTAAGCCAATATAGTTTGCTTTCTAAAACCTTAGTTAGCCCCTGGACTCTCACTCATTGATAGCCTCAGTACCTCAGGAGGAGAGCAGATACTGCCG	-	intergenic_variant	MODIFIER	-	-	-	-
sv_19038	11	15045029	15045090	61	DEL	CATAAACACTTAGAGACCAGGGAGATGATGGGTGCTGCCAGTGGAAGGATGTATAAAACATG	C	-	intergenic_variant	MODIFIER	-	-	-	-
sv_19231	11	24232285	24232285	80	INS	A	ACGCCACAAGCGCAACGACTTGGGATCTGAGCTGTGTCTGCAAGCTACACCACAGCTCGCAGCCATTCAGCATCCTTAACC	-	intergenic_variant	MODIFIER	-	-	-	-
sv_19270	11	26509187	26509460	273	DEL	TAGGTCGCAGACACGGCTGGGATCCAGTGTTGCTGTGGCTCTGGCATAGGCCAGTGGCTACAGCTCTGATTCGACCCCTAGCCTGGGAACCTCCATCTGCTGCGGGAGTGGCCCTAGAAAAGGCAAAAAAAAAAAAAGTATTTTATATGCTCTGTCACATGACACATTTGAAGCACTGGAGAGCTACTAAAGTAATTACAACGGGAAGGGCCAAGATCTGGGAAATGAAAGTGCAAAGAGATCCATTTGATTTTCAGGGATGCTTTTCCCTTCA	T	-	intergenic_variant	MODIFIER	-	-	-	-
sv_19284	11	27007567	27008407	840	DEL	CTTTTTGAGAAATGCAAATCAAAACTACCATGAGATATCACCTCACACCAGTCAGAATGGCCATCATTAATAAATCCACAAATAACAAGTGCTGGAGGGGCTGTGGAGAAAAGGGAACCCTCCTGCACTGTTGCTGGGAATGTAAACTGGTACAGCCACTATGGAGAACAGTTTGGAGATACCTTAGAAATCTATCCATAGAACTTCCATATGACCTCGCAATCCTACTCTTGGGCATCTATCCGGACAAAACTCTCCTTAAAAGAGACACGTGCACCCGCATATTCATTGCAGCACTATTCACAATAGCCAAGACATGGAAACAACCTAAATGTCCATCGACAGAGGATTGGATTCGGAAGATGTGGTATATATACACAATGGAATACTACTCAGCCA…	C	-	intergenic_variant	MODIFIER	-	-	-	-
sv_19311	11	27688680	27688953	273	DEL	TTCATAAATTTCTTTTTTTTTTTTTGTCTTTTTGCCATTTCTTGGGCTGCTCCCACGGCATATGGAGGTTCCCAGGCTAGGGGTCTAATCGGAGCTGTAGCTGCCAGCCTATGCCAGAGCCACAGCAACGCAGGATCCGAGCCGAGTCTGCCACCTACACCACAGCTCACGGCAACGCTGGATCCTTAACCCACTGAGCAAGGCCAGGGATCCAACCCGCAACCTCATGATTCCTAGTTGGATTTGTTAACCACTGTGCCACGACGCGAACTCC	T	-	intergenic_variant	MODIFIER	-	-	-	-
sv_19332	11	28759917	28760078	161	DUP:TANDEM	AGGTGTCCTGGGTTCTCTACTCTGTTCCATTGGTCTGTATGTCTGTTTTGGTACCAGTACCACACTGTCTTGATGACTGTGGCTTTGTGATACGGCCTGAAGTATGGGAAAGTTCTGCTTCCTGCTTGGTTTTTTCTCCTCAGAATTGCTTTGGAAATTCTG	AGGTGTCCTGGGTTCTCTACTCTGTTCCATTGGTCTGTATGTCTGTTTTGGTACCAGTACCACACTGTCTTGATGACTGTGGCTTTGTGATACGGCCTGAAGTATGGGAAAGTTCTGCTTCCTGCTTGGTTTTTTCTCCTCAGAATTGCTTTGGAAATTCTGGGTGTCCTGGGTTCTCTACTCTGTTCCATTGGTCTGTATGTCTGTTTTGGTACCAGTACCACACTGTCTTGATGACTGTGGCTTTGTGATACGGCCTGAAGTATGGGAAAGTTCTGCTTCCTGCTTGGTTTTTTCTCCTCAGAATTGCTTTGGAAATTCTG	-	intergenic_variant	MODIFIER	-	-	-	-
sv_19397	11	33246762	33246762	56	INS	T	TTCCTTAGGTGTTACTGAAACCAAAGAGTCCTAAGACAAATTCTACTTCATGTACTG	-	intergenic_variant	MODIFIER	-	-	-	-
sv_19493	11	43519023	43519573	550	DUP:TANDEM	CTGTGGTGTAGGCTGGCTGTTGCAGGTCCAATTTGACCCCTAGCCTGGAACTTTCATATGCTACAGGTGCAGCCCTAAAAAGAGAAAAACAAAAAAAGTGATATAGAAGTGGCAGGATTTTAGAAATGTTATTCAGAAGCAACACCTGGAGTTCCCGTCGTGGCGCAGTGGTTAACGCATCCGACTAGGAACCATGAGGTTGTGGGGTTCAGTCCCTGCCCTTGCTCACTGGGTTGAGGATCCAGCGTTGCCCTGAGCTGTGGTGTAGGTTGCAGACGTGGCTCCGATCCCACGTTGCTGTGGCTCTTGCATAGGCCGGCAGCTACAGCTCTGATTCGAACCCTAGCCTTGGAAACTCCATATGCCATGGGAAGCGGCCCAAGAAATAGCAAAAAGAAA…	CTGTGGTGTAGGCTGGCTGTTGCAGGTCCAATTTGACCCCTAGCCTGGAACTTTCATATGCTACAGGTGCAGCCCTAAAAAGAGAAAAACAAAAAAAGTGATATAGAAGTGGCAGGATTTTAGAAATGTTATTCAGAAGCAACACCTGGAGTTCCCGTCGTGGCGCAGTGGTTAACGCATCCGACTAGGAACCATGAGGTTGTGGGGTTCAGTCCCTGCCCTTGCTCACTGGGTTGAGGATCCAGCGTTGCCCTGAGCTGTGGTGTAGGTTGCAGACGTGGCTCCGATCCCACGTTGCTGTGGCTCTTGCATAGGCCGGCAGCTACAGCTCTGATTCGAACCCTAGCCTTGGAAACTCCATATGCCATGGGAAGCGGCCCAAGAAATAGCAAAAAGAAA…	-	intergenic_variant	MODIFIER	-	-	-	-
sv_19571	11	48446028	48446106	78	DEL	TTCTTATTATTAATTTTATTTATTTATTTATTTATTTTTATTTTCCCACTGTACAGCAAGGGGGTCAGGTTATCCTTAG	T	-	intergenic_variant	MODIFIER	-	-	-	-
sv_19667	11	54546640	54546697	57	DEL	GTTTAGAAATCAGATACATAGGTCTTTCTCTAAATGTTTTATTTTGTTGATTTCTGAA	G	-	intergenic_variant	MODIFIER	-	-	-	-
sv_19669	11	54853909	54854188	279	DEL	TAAAAATTCATAGCGGAGTTCCCGTCGTGGCGCAGTGGTTAACGAATCCGACTAGGAACCATGAGGTTGCGGGTTCGTTCCCTGCCCTTGCTCAGTGGGTTAACGATCTGGCGTTGCCGTGAGCTGTGGTGTAGGTTGCAGACTCGGCTCGGATCCCACGTTGCTGTGGCTCTGGCATAGGCCAGTGGCTACAGCTCCGATTCAACCCCTAGCCTGGGAACCTCCATATGCCGCGGGAGCAGCCCAAAGAAATAGCAAAAAGACCAAAAAAAAAAAAAAA	T	-	intergenic_variant	MODIFIER	-	-	-	-
sv_19737	11	60106915	60107025	110	DEL	TCAATGTGCTTAAATTTTAGAAAACCTGAGATAAATAATTTTTATGCCCTATGGAATTTATTGAGTTTTTTTTTTTTTTTTTTTTTTTTTTTTTGTCTTTTAAGGCCGCAC	T	-	intergenic_variant	MODIFIER	-	-	-	-
sv_19908	11	69466474	69466474	60	INS	C	CAGAAAAGGGAACAAAGCCTAATTGTACAGCCCTTGAGTTTCTGCAAAGTGAACACACCTG	-	intergenic_variant	MODIFIER	-	-	-	-
sv_19967	11	72599638	72599905	267	DEL	AAAAAAATATGCAGGAGTTCCCGTCGTGGCGCAGTGGTTAACGAATCCAACTAGGAACCATGAGGTTGCGGGTTCGGTCCCTGCCCTTGCTCAGTGGGTTAAGGATCCGGCGTTGCCGTGAGCTGTGGTGTAGGTTGCAGACGCGGCTCGGATCCCGCGTTGCTGTGGCTCTGGCGTAGGCCGGTGGCTACGGCTCCGATTCAACCCTTAGCCTGGGAACCTCCATATGCCGAGGGAGAGGCCCAAGAAATGGCAAAAAAAAAAAAAG	A	-	intergenic_variant	MODIFIER	-	-	-	-
sv_20005	11	75729685	75729967	282	DEL	TAAAACAAAACAAAACAAGGAGTTCCCGTCGTGGTGCAGTGGTTAACGAATCCGACTAGGAACCACGAGGTTGCGGGTTCGGTCCCTGCCCTTGCTCAGTGGGTTAACGATCCGGCGTTGCCGTGAGCTGTGGTGTAGGTTGCAGGCGCGGCTCGGATCCCGCGTTGCTGTGGCTCTGGTGTAGACCGGTGGCTACAGCTCCGATTCAACCCCTAGCCTGGGAACCTCCATATGCCGCGGGAGAGGCCCAAGAAATAGCAACAACAACAACAACAAAAAGACA	T	-	intergenic_variant	MODIFIER	-	-	-	-
sv_20575	12	34369816	34369921	105	DEL	TGTTGTAGCACAGTGGTTAACGAATCTGATGAAGAACCATGAGGTTGCAGGTTCGACCCCTGGCCTTGCTCAATGGGTTAAGGATCCAGCGTTGCCATGAGCTGTG	T	-	intergenic_variant	MODIFIER	-	-	-	-
sv_20645	12	37949052	37949354	302	DEL	GCCAGATCCTTAACCCACTGAGCAAGGCCAGGGATCGAACCCGAAACCTCATGTTTCCTAGTCGGATTCATTTCCACTGCACCACGACGGGAACTCCAGACCATGTGATTATAAGCAATATAATTTGTGTTAGTTATAACTGAACTTTATCTTCTTTGTCTTTTTTTTTAAAGCCCTCAGGTGCAGCATAGGGAGGTTCCCAGGCAAGGGTCGAATTTGAACTCCAGCTGCCGGCCTACACCTCAGCCACACCAACTCGGGATTCAAGTCTCGTCTGCGACCTACACCACAGCCACAGCCACA	G	-	intergenic_variant	MODIFIER	-	-	-	-
sv_20761	12	43865988	43866123	135	DEL	TTTAAATTTGGGGGTTTTTTGGGTCCATGTCCATAGCATGTGGAAATTCTGGGTCAGGGATCAAACCTGAGCCACAGCAGTGACAACGCCAGATCATTAATTTCTAGGCCACTAGGGAACTCTAGAGAAGCACATC	T	-	intergenic_variant	MODIFIER	-	-	-	-
sv_20936	12	53830048	53830166	118	DEL	TGGGGAGGGAGGTATTTTTACCATACTTGCAACTTTTGGGTAAATTTGAGATTATTTCAAATTTTTTTTTTCTTTTTACGGCTGTACTCAAGGCGTAGTATGGAGGTTCCCAGGCTAGG	T	-	intergenic_variant	MODIFIER	-	-	-	-
sv_21074	12	61598100	61598100	175	INS	A	AAGAGACGGGCCGAAGGACTCCGTGCATCCCGTCCAGATGGCCGAGCCTAGCCCATCGGACCCAACCGAATTGCCTGGCGAGGAGGAAGTGATGAGGAT	-	intergenic_variant	MODIFIER	-	-	-	-
sv_21127	13	37565	37565	88	INS	T	TGCTACGTGGCATGGAATCCACTGCATTCAATCTGGATCCATTGTGCTACACTGCATGGAATCCACTGCATTCAATCAGGATCCATTGG	-	intergenic_variant	MODIFIER	-	-	-	-
sv_21150	13	54726	55630	904	DUP:TANDEM	TTGCATTCAATCGGTATCAATTACACCAAGCTGCATGGAATCCACCTCATTCAACTGAGATATACTACAGCACTCTGCATAGAATCCACTGCATTCAATCGTGCTTCATGGAATTCACTGCATTCAATCGGGATCCGTTGGGCCACACTGCATGGAATCCACGGCATTCACTCAGTATCCATTGCAGCATGCTGCATGGATTCCACTGCATCCAACCTGGATACATTGCCCCACGCTGCATGCAATCCACTGCGTTCAATCGGGATGCATTTCACAACGCTGCATGGAATCCAGTGCATTCAATCATGCCACATGGAATCCACAGCATTAAAACAGGATCCATTGGGCCAAGCTGCATGCAATCCACTGTATTCACTCTGGATGCATTTCACACTGCTG…	TTGCATTCAATCGGTATCAATTACACCAAGCTGCATGGAATCCACCTCATTCAACTGAGATATACTACAGCACTCTGCATAGAATCCACTGCATTCAATCGTGCTTCATGGAATTCACTGCATTCAATCGGGATCCGTTGGGCCACACTGCATGGAATCCACGGCATTCACTCAGTATCCATTGCAGCATGCTGCATGGATTCCACTGCATCCAACCTGGATACATTGCCCCACGCTGCATGCAATCCACTGCGTTCAATCGGGATGCATTTCACAACGCTGCATGGAATCCAGTGCATTCAATCATGCCACATGGAATCCACAGCATTAAAACAGGATCCATTGGGCCAAGCTGCATGCAATCCACTGTATTCACTCTGGATGCATTTCACACTGCTG…	-	intergenic_variant	MODIFIER	-	-	-	-
sv_21273	13	129767	129900	133	DUP:TANDEM	GGGATGCATTTCACAACGCTGCATGGAATCCAGTGCATTCAATCATGCCACATGGAATCCACAGCATTAAAACAGGATCCATTGGGCCAAGCTGCATGCAATCCACTGTATTCACTCT	GGGATGCATTTCACAACGCTGCATGGAATCCAGTGCATTCAATCATGCCACATGGAATCCACAGCATTAAAACAGGATCCATTGGGCCAAGCTGCATGCAATCCACTGTATTCACTCTGGATGCATTTCACAACGCTGCATGGAATCCAGTGCATTCAATCATGCCACATGGAATCCACAGCATTAAAACAGGATCCATTGGGCCAAGCTGCATGCAATCCACTGTATTCACTCT	-	intergenic_variant	MODIFIER	-	-	-	-
sv_21313	13	140983	140983	73	INS	T	TTGCATTCAATCGGGATCCATTTCACAATGCTGCATTGAATCCACAGCATTGAATCTTGATGCATGGAATCCAC	-	intergenic_variant	MODIFIER	-	-	-	-
sv_21315	13	141202	141202	110	INS	G	GATGCATGGAATCCACTGCATTCAATTGGTATCAATTACACAATGCTGCATGGAATATACTGCATTCAATCGGGATACATTTTCCCAA	-	intergenic_variant	MODIFIER	-	-	-	-
sv_21551	13	10888888	10889105	217	DEL	TTTATTTTATTTTATTTTTTTTATTTTTTTTACTTTCTAAGTATATTATTCCAAGAAGGTCGAAGTAGTTTTAGAGGCTTTTCAAATACCTTTTTCATTTTTTATTTTTATTTTTATTTTTTTATTTTCCCACTGTACAGCAAGGGGGTCAGGTTATCCTTACATGTATACATTACAATTATATTTTTCCCCCACCATTTCTTCTGATGGGATGTATA	T	-	intergenic_variant	MODIFIER	-	-	-	-
sv_21660	13	15470966	15471026	60	DEL	TTAAGGGAGACTGGGCACTTCTTGTGCAGGCTACAAGTGGCCAGGCACCTCTTGTGTGGAC	T	-	intergenic_variant	MODIFIER	-	-	-	-
sv_21729	13	19751170	19751301	131	DEL	CAGATTCCACATATCAGTGAAAGCCTTTGATGTTGGTGTCAGGATAGTCTCTAATAAATGGAGGTGGCAAACAGGAAAAGCTCATGCAGAAGAATGAAACTGGACCACCTCCCCCATCTTACACCACTCACA	C	-	intergenic_variant	MODIFIER	-	-	-	-
sv_21946	13	40473543	40473658	115	DUP:TANDEM	GGCCTGAATGAAATAACCAGTTCAACCTCTAGACCTAGGGCATTGTTCTTTAGGAATCTCCTGTAAGCTGTTGGCGATGAACAGAATTGTTCCTCCTTGGGAGGCTCTGAACTTTT	GGCCTGAATGAAATAACCAGTTCAACCTCTAGACCTAGGGCATTGTTCTTTAGGAATCTCCTGTAAGCTGTTGGCGATGAACAGAATTGTTCCTCCTTGGGAGGCTCTGAACTTTTGCCTGAATGAAATAACCAGTTCAACCTCTAGACCTAGGGCATTGTTCTTTAGGAATCTCCTGTAAGCTGTTGGCGATGAACAGAATTGTTCCTCCTTGGGAGGCTCTGAACTTTT	-	intergenic_variant	MODIFIER	-	-	-	-
sv_22186	13	70616501	70616501	95	INS	T	TTGTTTTATTTTTGGTGGAAATACAAGTATTATGGTTACGAATACTTACAAATACTTATATAGTTAAAAATACTTATACCTGTGTGCATATATATA	-	intergenic_variant	MODIFIER	-	-	-	-
sv_22205	13	73934384	73934664	280	DEL	ATTTTTTTTTTTTTTTTTTTTTTTGGTCTTTTTGCTATTTTCTGGGCGGCTCCCGCGGCATATGGAGGTTCCCAGGCTAGGGGTCCAATCGGAGCTGTAGCCACCAGCCTACGCCAGAGCCACAGCAATGCAGGATCCGAGCCACATCTGCAACCTACACCACAGCTCACGGCAACGCTGGATCGTTAACCCACTGAGCAAGGGCAGGGATCGAACCCACAACCTCATGGTTCCTAGTCGGATTCGTTAACCACTGCGCCACGACGGGAACTCCAAGATTT	A	-	intergenic_variant	MODIFIER	-	-	-	-
sv_22317	13	85721057	85721212	155	DEL	CCTATTACTAAGACAAAGAAGCCAATCTAGAAGGCTATATACTGTATGATCAAACTGTATGACATTCTGGAAAGGACAAAATTATGAACACAATAAAAAAGATCAGTGGTTGCCAGGGATATGGTGAGGGAGTGGGGGAGGAGAGAACAGGCAGAA	C	-	intergenic_variant	MODIFIER	-	-	-	-
sv_22657	13	131241567	131241619	52	DEL	GCCTGAGCGTGGGGGTTGCCAGCAGGGCTGAGGAAGGAGCAGGCAGGAGCCAC	G	-	intergenic_variant	MODIFIER	-	-	-	-
sv_22683	13	133667585	133667879	294	DEL	CAAGAGTTAACTAATAAAGGGAGTTCCCGTCGTGGCGCAGTGGTTAACGAATCCGACTAGGAACCATGAGGTTGCGGGTTCGGTCCCTGCCCTTGCTCAGTGGGTTAACGATCCAGCGTTGCTGTGAGCTGTGGTGTAGGTTGCAGACACGGCTCGGATCCCGCGTTGCTGTGGCTCTGGCGTAGGCCGGTGGCTACAGCTCCGATTCAACCCCTAGCCTGGGAACCTCCATATGCTGCGGGAGCGGCCCAAGAAATAGCAACAACAACAAAAGACAAAAAAAAAAAAAAAAAAA	C	-	intergenic_variant	MODIFIER	-	-	-	-
sv_22869	13	153761875	153761875	78	INS	C	CAGCCCCACCCATCGGTAAACAGGCTGCCTAAAGAGGCCCCTCAGGCACACAGCAACCTCTATTCTCACCCAGAGACAA	-	intergenic_variant	MODIFIER	-	-	-	-
sv_22879	13	154292535	154292653	118	DEL	GCAAGCAATGGGAGACTAGCTAGCAAGGATGATGTGGTCAACATTAAAAATAATAATAAGAGATGAATTGCAGACATTAACATGGCAATTCTTTCAAAAAGTTTTGCTGCGAAGGGAAA	G	-	intergenic_variant	MODIFIER	-	-	-	-
sv_23392	13	197622368	197622657	289	DEL	CGCAGTGTCCTCACTTCCCCTGGCTGTGGAAGGGGCAGGGAGTTCTCTGGGATCTCTCTCTCTCTTTTAAGACTTTTATTTTTTTCTATTATAGTCGATTTACAATGTTCTGTCAATTTCTGCTGTAAAGCAACCTGCAATCTCTTTTATAAGGGCACTAATCCCATTCACGAGGAAGCCACCCTCATGACCTAATCATCTCTCAAAGGCCTCACCTCCAAACATCACCATCACATTGGGAATTAGGTTCAAATGTAAGAGTGTGGAGAGGCAAAACTATTCTGTCTATA	C	-	intergenic_variant	MODIFIER	-	-	-	-
sv_23413	13	198945367	198945659	292	DEL	TAAAGAATATTTTCCTGGGGAGTTCCTGTCCTGGCGCAGTGGTTACCGAATCCGACTAGGAACCATGAGATTGCGGGTTCGGTCCCTGCGCTTGCTCAGTGGGTGAAGGATCCGGCGTTGCCGTGAGCTGTGGTGTAGGTTGCAGACTCGGCTCGGATCCCACGTTGCTGTGGCTCTGGTGTAGGCCGGTGGCTACAGCTCCGATTTGACCCCTAGCCTGGGAACCTCCATATGCCACCGGAGCGGCCCAAGAAATAACTAAAAAAAATAAAATAAAAAATAAAAAATAAAAA	T	-	intergenic_variant	MODIFIER	-	-	-	-
sv_23572	14	488975	489315	340	DEL	GATCCCTGGCCTCGCTCAGTGGGTTAAGGATCTAGTGTTGCCATGAGCTCTGGTGTAGCTCGCAGACGTGGCTTGGATCCTGTGCTGCTGTGGCTGTGGTGTAGGCTGGCAGCTGCAGCTCTGAATAGACCCCCAGCCTGGGAACCTCCATATGCCACAGGTGCGGCCCTCAAAAAGACAGAAAAGGCAAAAAAAAAAAAAAAAAAAAAAAAGGAACTTGTAGGCAATTAGTCAGTATAAGAATCTCTGGACTTCCTACGGTCTTCCTAACAACCATTTAAAATGGTTGGAGTTCCTTTCGTGGCTCAGCGGTTAACGAACCCCATGAGGATGTGTGTTCA	G	-	intergenic_variant	MODIFIER	-	-	-	-
sv_23588	14	1132504	1132788	284	DEL	GCCTGCATTGTTTTTCTTTTCTTTTTTTTTTTTTTGTCTTTTTTCCTTTTTCTGGGGCCACTCCAGTGGCATATGGAGGTTCCCAGGCTAGGGGTCGAATCGGAGCTGTAGCTGCTGGCCTACGCCTGAGCCACAGCAACGGAGGATCCGAGCCATGTCTGCAGCCTACACCACAGCTCACAGCAACGCCGGATCATTAACCCATTGATCAAGGGCAGGGACCGAACCTACAACCTCATGGTTCCTAGTCAGATTCGTTAACCACTGCACCACGACAGGAACTCC	G	-	intergenic_variant	MODIFIER	-	-	-	-
sv_23748	14	8207627	8207690	63	DEL	CCCACACACCCTCACACACCCACACCCACACACCCTCACACACCCACCCACACACCCTCACACA	C	-	intergenic_variant	MODIFIER	-	-	-	-
sv_23775	14	9186495	9186772	277	DEL	AAAACAAACAAGGAGTTCCCGTCATGGCGCAGTGGTTAACGAATCCGACTAGGAACCATGAGGTTGCGGGTTCGATCCCTGCCCTTGCTCAGTGGGTTAACGATCCGGCGTTGCCCTGAGCTGTGGTGTAGGTTGCAGACGCGGCTCGGATCCCGCGTTGCTGTGGCTCTGGTGTAGGCCGGGGACTACAGCTCCGATTGGACCCCTAGCCTGGGAACCTCCATATGCCGCGGGAGCAGCCCAAAGAAATAGCAAAAAGACAAAACAAACAAACAAAC	A	-	intergenic_variant	MODIFIER	-	-	-	-
sv_24345	14	61602204	61602204	71	INS	A	AAAGGAAGGAAGGAAGGAAGGAAAGGAAGGAAGGAAAGAGAGAGAAAGAAAGAAAGAAAGAAAGAAAGAAGG	-	intergenic_variant	MODIFIER	-	-	-	-
sv_24348	14	61732188	61732188	88	INS	G	GAGCCTCATCTGTAACCTACACCACAGCTCACAGCAACACTGGATCCTTAACACACTGAGCGAGGCCAGGGATCAAACTCACATCCTCC	-	intergenic_variant	MODIFIER	-	-	-	-
sv_24358	14	63014906	63014976	70	DEL	TACACACACACACACACACAGAGTATGTTTGCTCTTGTCTCGCTTCCTCATGTAAAATATAAGCTTTTTAA	T	-	intergenic_variant	MODIFIER	-	-	-	-
sv_24433	14	72115936	72115936	87	INS	G	GCAAGGAGGCTAATGATCTGGCTCCTCTCTATTGCACTGCAGGTTCAATCCCTGGCCTTGATCAGTGGGTTAAGGATCCGGTGTTGCC	-	intergenic_variant	MODIFIER	-	-	-	-
sv_24564	14	84420642	84420707	65	DEL	CTGGGGCATCTATTGAGTGCTTACTGTGTGTGAGAGCAAGTTCTAAAAGCAGGATGTGCATTCTCT	C	-	intergenic_variant	MODIFIER	-	-	-	-
sv_24681	14	96402737	96402797	60	DEL	ATATATATATATATACACACATATATATATTGTCTTTTTGCCTTTTCTTGGGCCGCTCCTG	A	-	intergenic_variant	MODIFIER	-	-	-	-
sv_24903	14	114183675	114183974	299	DEL	TGAAAGGCAATTTTTTTTTTTTTGTCTTTTGTCTTTGTTGTTGTTGTTGTTGTTGTTGCTATTTCTTGGGCCGCTCCCGCGGCATATGGAGGTTCCCAGGCTAGGGGTCCAATCGGAGCTGTAGCCACCGGCCTACGCCAGAGTCACAGCAACGCGGGATCCGAGCCGCGTCTGCAACCTACACCACAGCTCACGGCAACGCCGGATCCTTAACCCACTGAGCAAGGCCAGGGACTGAACCCGCAACCTCATGGTTCCTAGTCAGATTCGTTAACCACTGCGCCACGACAGGAACTCCAC	T	-	intergenic_variant	MODIFIER	-	-	-	-
sv_24937	14	117309571	117309686	115	DUP:TANDEM	GTGAATCTTCCAAGCAAGGATTGGCACCGAAAGCTGGATTTCCCTTTTAAACTATTTTAATGCTTTGTAGTTACCCACAAAGATGGACTATTTACTCTTTTAGTCAATTTAAAAAT	GTGAATCTTCCAAGCAAGGATTGGCACCGAAAGCTGGATTTCCCTTTTAAACTATTTTAATGCTTTGTAGTTACCCACAAAGATGGACTATTTACTCTTTTAGTCAATTTAAAAATTGAATCTTCCAAGCAAGGATTGGCACCGAAAGCTGGATTTCCCTTTTAAACTATTTTAATGCTTTGTAGTTACCCACAAAGATGGACTATTTACTCTTTTAGTCAATTTAAAAAT	-	intergenic_variant	MODIFIER	-	-	-	-
sv_24946	14	118264973	118265033	60	DEL	TCATAGCCATCATAGCAATTTTTTTTTTTTTTTTTTTTGCTTTTTAGGGCCACACATGTGG	T	-	intergenic_variant	MODIFIER	-	-	-	-
sv_24998	14	121486515	121486670	155	DUP:TANDEM	TCCTCCTCCTGGGCCAGCCCTTCCATGTTGGGTGGTCTGTGTCCTGACCCGCGACCTGTGACTGATACACAAGGGCTAGAGGCCAAAGAGTGAGGGGTGAAGGTCTTGCCCTTCACCTTCTTGCACAGGGAGCATGGAAGGCATCTGGGGTTGGTC	TCCTCCTCCTGGGCCAGCCCTTCCATGTTGGGTGGTCTGTGTCCTGACCCGCGACCTGTGACTGATACACAAGGGCTAGAGGCCAAAGAGTGAGGGGTGAAGGTCTTGCCCTTCACCTTCTTGCACAGGGAGCATGGAAGGCATCTGGGGTTGGTCCCTCCTCCTGGGCCAGCCCTTCCATGTTGGGTGGTCTGTGTCCTGACCCGCGACCTGTGACTGATACACAAGGGCTAGAGGCCAAAGAGTGAGGGGTGAAGGTCTTGCCCTTCACCTTCTTGCACAGGGAGCATGGAAGGCATCTGGGGTTGGTC	-	intergenic_variant	MODIFIER	-	-	-	-
sv_25006	14	122204932	122204932	73	INS	C	CAGATACAGTGTTGCTGTGGCTGTGGTGTAGGCTGGCAGCTGTAGCTCCAATGAGACCCCTAGCCTGGGAAACT	-	intergenic_variant	MODIFIER	-	-	-	-
sv_25128	14	129839165	129839237	72	DUP:TANDEM	CTAGAAATAGGCCCCATGTCAATGGAGACTTGGTATTTTATAGAGCTAGGGAAAGAGAGATTATTGGCAAATA	CTAGAAATAGGCCCCATGTCAATGGAGACTTGGTATTTTATAGAGCTAGGGAAAGAGAGATTATTGGCAAATAGATATAGGCCACATGTCAATTGAGATTTGGTATTTTATAGAGCTTAGGGAAAGGTAGATTATTGGCAAATAGAAATAGGCCCCATGTCAATGGAGACTTGGTATTTTATAGAGCTAGGGAAAGAGAGATTATTGGCAAATA	-	intergenic_variant	MODIFIER	-	-	-	-
sv_25162	14	132226044	132226140	96	DEL	AGAGATGCTTAGACATCCTTGCCTGACCCTAACCCATCCTGTGAGCATCCTCCTTGACATGCTCACAGACCACCAGGTGCCAAGACTCCTTGGAAGG	A	-	intergenic_variant	MODIFIER	-	-	-	-
sv_25276	14	137476071	137476242	171	DEL	AAAAAAAAAAAAACTATGTCTAGATACTCATGTCGCAACAGAAGAAAGGGTGGGGGAAAAAAAACTGTAACTGCAATGTATACATCTAAGGATGACTTGACTTGACCCCCTTGCTGTACAGTGGGAAAATAATAATAATAAAAAAAAATGCAGTCTAATCAAATTTAAAAAT	A	-	intergenic_variant	MODIFIER	-	-	-	-
sv_25369	15	6217	6217	73	INS	G	GCATGGAATCAACTGCACTCAATCACGCTGCATAAAATCCACTGCATTCAATCAGGTTGCATTGGGCCTCGCTT	-	intergenic_variant	MODIFIER	-	-	-	-
sv_25403	15	10074	10074	61	INS	C	CCATGCTGCATAAAATCCACTGCATTCAATCATGCTGCATGGAATCCACTGCATTCATT	-	intergenic_variant	MODIFIER	-	-	-	-
sv_25409	15	10279	10981	702	DEL	CATGCTGCATGGAATCCACTGCATTCAATCATGCTTCATAAAATCCACTGCATTCAATAGGGTTCCATTTCTTCACGCTGCATGGAATACACAGCATTCAATCACGCTGCATGGAATCCGCTGCATTCAATCGGGATGCATTTTTCCACGCTATATTGAGTGCACTGCATTCAATCACAATGCATGGAATCCACTGCATTCACTCGGGATCCATTTCACAACGCTGCATGGAATCCACTGCATTGAATCTCGATGCATGGAATCCACTGCATTACATTGGTATCAATTACACAATGCTGCAGGGAATCCACTGCATTCAGTCGGGATCCATTGCAGCATGCTGCATGGATTCCACTGCATTCAACCTGGATACATTGCCCCACGCTGCATGCAATCCTT…	C	-	intergenic_variant	MODIFIER	-	-	-	-
sv_25410	15	10281	10500	219	DUP:TANDEM	TGCTGCATGGAATCCACTGCATTCAATCATGCTTCATAAAATCCACTGCATTCAATAGGGTTCCATTTCTTCACGCTGCATGGAATACACAGCATTCAATCACGCTGCATGGAATCCGCTGCATTCAATCGGGATGCATTTTTCCACGCTATATTGAGTGCACTGCATTCAATCACAATGCATGGAATCCACTGCATTCACTCGGGATCCATTTCACAAC	TGCTGCATGGAATCCACTGCATTCAATCATGCTTCATAAAATCCACTGCATTCAATAGGGTTCCATTTCTTCACGCTGCATGGAATACACAGCATTCAATCACGCTGCATGGAATCCGCTGCATTCAATCGGGATGCATTTTTCCACGCTATATTGAGTGCACTGCATTCAATCACAATGCATGGAATCCACTGCATTCACTCGGGATCCATTTCACAACGCTGCATGGAATCCACTGCATTCAATCATGCTTCATAAAATCCACTGCATTCAATAGGGTTCCATTTCTTCACGCTGCATGGAATACACAGCATTCAATCACGCTGCATGGAATCCGCTGCATTCAATCGGGATGCATTTTTCCACGCTATATTGAGTGCACTGCATTCAATCACAATG…	-	intergenic_variant	MODIFIER	-	-	-	-
sv_25417	15	11131	11131	73	INS	G	GTGCATGGAATCCACTGCATTAAATCAGGCTGCATACAAACCACTGCATTCAACATGGTTCCAATACTTCACGC	-	intergenic_variant	MODIFIER	-	-	-	-
sv_25428	15	13316	13316	77	INS	C	CGCTGCATGGAATCCACTGCATTCAATCACACTGCATGGAATCCACTGCATTCAATCGGGATGCATTTTACCAG	-	intergenic_variant	MODIFIER	-	-	-	-
sv_25439	15	14364	15035	671	DUP:TANDEM	TGGGATGCATTTTACCAGGCTGCATGGATTACCTGCAATCAATCACGCTGCATGGAATCCACTGCATTCAATCAGGATGCTTTGGGCCATGCTGCATAATATCCACTGCATTCAATCATACTGCATCGAATCCACTGCATACAATCATGCTGCATAAAATCCACTGCATTCAATAAGGTTCCATTTCTTCACGCTGCATGGAATCCACTGCATTCTATCGGGATGCATTTTACCATGCTTCATGGATTACACTGCATTCAATCACGCTGCATGGAATCCACTGCATTCAATCGGGATGTTTGGGCCATGCTGCATAAAATCCACTGCATACAATCAGGATCCATTGCGCCACAATGCATGGAATCCTCTGCATTCAAAAATGCTGCATGGAATTGACTG…	TGGGATGCATTTTACCAGGCTGCATGGATTACCTGCAATCAATCACGCTGCATGGAATCCACTGCATTCAATCAGGATGCTTTGGGCCATGCTGCATAATATCCACTGCATTCAATCATACTGCATCGAATCCACTGCATACAATCATGCTGCATAAAATCCACTGCATTCAATAAGGTTCCATTTCTTCACGCTGCATGGAATCCACTGCATTCTATCGGGATGCATTTTACCATGCTTCATGGATTACACTGCATTCAATCACGCTGCATGGAATCCACTGCATTCAATCGGGATGTTTGGGCCATGCTGCATAAAATCCACTGCATACAATCAGGATCCATTGCGCCACAATGCATGGAATCCTCTGCATTCAAAAATGCTGCATGGAATTGACTG…	-	intergenic_variant	MODIFIER	-	-	-	-
sv_25452	15	16066	16066	73	INS	T	TACAACGCTGCATGGATTCCACTGCATTCAGTCATGCTGCATGGAATCCACTGCATTCAATCGGGATGCATTTC	-	intergenic_variant	MODIFIER	-	-	-	-
sv_25455	15	16446	17366	920	DUP:TANDEM	CTCCACTGCATACAATCGGGACCCATTGCGCCACAATGCATGGAATCCTCTGCATTCAATCACGCTGCATGGAATCCACTGCATTCAATCATGCTGCATAAAATCCACTGAATTCAATCACGCTGCATGGAATCCACTGCATTCAATCGGGATGCATTTTACCACGCTGCATGGATTACACTGCAATCAATCACGCTGCATGGAATCCACTGCATTCAGTCGGGATGAATTGGGCCATGCTCCATATAATCCACAGCATTCAATCGGGATGCATTGGGCCTCGCTGCATGGACCCCACTGCATACAATAGGGATCCATTGCGCCACAATGCATGGAATCCTCTGCATTCAATGACGCTGCATGGAATCCACTGCATTCAATCGGGATGCTTTGGGACAT…	CTCCACTGCATACAATCGGGACCCATTGCGCCACAATGCATGGAATCCTCTGCATTCAATCACGCTGCATGGAATCCACTGCATTCAATCATGCTGCATAAAATCCACTGAATTCAATCACGCTGCATGGAATCCACTGCATTCAATCGGGATGCATTTTACCACGCTGCATGGATTACACTGCAATCAATCACGCTGCATGGAATCCACTGCATTCAGTCGGGATGAATTGGGCCATGCTCCATATAATCCACAGCATTCAATCGGGATGCATTGGGCCTCGCTGCATGGACCCCACTGCATACAATAGGGATCCATTGCGCCACAATGCATGGAATCCTCTGCATTCAATGACGCTGCATGGAATCCACTGCATTCAATCGGGATGCTTTGGGACAT…	-	intergenic_variant	MODIFIER	-	-	-	-
sv_25492	15	20640	20976	336	DUP:TANDEM	AGCATTCAATCGGGATGCATTGGGCCTCGCTGCATGGACTCCACTGCATACAATCAGGATCCATTGCGCCACAATGCATGGAATCCTCTGCATTCAATGACGCTGCATGGAATCCACTGCATTCAATCGGGATGCATTGGGACATGCTGCAAAAAATCCACTGCATTCAATCATGCTGCATGGAATCCACTGCATTCAATCAGGCTGCATAAAATCCACTGCATTCAATAGGGTTCCATTACTTCACGCTGCATGGAATCCACTGCATTCAATAAGGATGCATTTTACCACGCTGCATGGATTCCACTGATGTCAATCACAATGCCTGGAATCCACT	AGCATTCAATCGGGATGCATTGGGCCTCGCTGCATGGACTCCACTGCATACAATCAGGATCCATTGCGCCACAATGCATGGAATCCTCTGCATTCAATGACGCTGCATGGAATCCACTGCATTCAATCGGGATGCATTGGGACATGCTGCAAAAAATCCACTGCATTCAATCATGCTGCATGGAATCCACTGCATTCAATCAGGCTGCATAAAATCCACTGCATTCAATAGGGTTCCATTACTTCACGCTGCATGGAATCCACTGCATTCAATAAGGATGCATTTTACCACGCTGCATGGATTCCACTGATGTCAATCACAATGCCTGGAATCCACTGCATTCAATCGGGATGCATTGGGCCTCGCTGCATGGACTCCACTGCATACAATCAGGATCCA…	-	intergenic_variant	MODIFIER	-	-	-	-
sv_25509	15	21849	21849	169	INS	A	ACTGCATTCAATCGGGATGCATTGGGCCTCGCTGCATGGAATACACAGCATTCAATCACGCTGCATGGAATCCG	-	intergenic_variant	MODIFIER	-	-	-	-
sv_25533	15	23827	24819	992	DUP:TANDEM	TGCATTCAATCATGCTGCATGGAATCCACTGCATTCAATCATGCTGCATAATATCCACTGCTTTCAATAGGGTTCCATTTCTTCACGCTGCATACAATACACTGCATTCAATCCCACTGTATGGAATACACTGCCTTCAATCGGGATGCATTTTACCATGCTGCATGGATTAAACTGCATTCAATCACAATGCATGGAATCCACTGCATTCAATCGGGATGTTTTGGGCCATGCTGCATAAAATCCACTGCATACAATCGGGACCCATTGCGCCACAATGCATGGAATCCTCTGCATTCAATGACGCTGCATGGAATCCACTGCATTCAATCGGGATGCTTTGGGCCATGCTGCATAAAATCCACCGACTTCAATCACGCTGCATGGAATACACTGCAT…	TGCATTCAATCATGCTGCATGGAATCCACTGCATTCAATCATGCTGCATAATATCCACTGCTTTCAATAGGGTTCCATTTCTTCACGCTGCATACAATACACTGCATTCAATCCCACTGTATGGAATACACTGCCTTCAATCGGGATGCATTTTACCATGCTGCATGGATTAAACTGCATTCAATCACAATGCATGGAATCCACTGCATTCAATCGGGATGTTTTGGGCCATGCTGCATAAAATCCACTGCATACAATCGGGACCCATTGCGCCACAATGCATGGAATCCTCTGCATTCAATGACGCTGCATGGAATCCACTGCATTCAATCGGGATGCTTTGGGCCATGCTGCATAAAATCCACCGACTTCAATCACGCTGCATGGAATACACTGCAT…	-	intergenic_variant	MODIFIER	-	-	-	-
sv_25534	15	23969	24159	190	DUP:TANDEM	GGGATGCATTTTACCATGCTGCATGGATTAAACTGCATTCAATCACAATGCATGGAATCCACTGCATTCAATCGGGATGTTTTGGGCCATGCTGCATAAAATCCACTGCATACAATCGGGACCCATTGCGCCACAATGCATGGAATCCTCTGCATTCAATGACGCTGCATGGAATCCACTGCATTCAATCG	GGGATGCATTTTACCATGCTGCATGGATTAAACTGCATTCAATCACAATGCATGGAATCCACTGCATTCAATCGGGATGTTTTGGGCCATGCTGCATAAAATCCACTGCATACAATCGGGACCCATTGCGCCACAATGCATGGAATCCTCTGCATTCAATGACGCTGCATGGAATCCACTGCATTCAATCGGGATGCATTTTACCATGCTGCATGGATTAAACTGCATTCAATCACAATGCATGGAATCCACTGCATTCAATCGGGATGTTTTGGGCCATGCTGCATAAAATCCACTGCATACAATCGGGACCCATTGCGCCACAATGCATGGAATCCTCTGCATTCAATGACGCTGCATGGAATCCACTGCATTCAATCG	-	intergenic_variant	MODIFIER	-	-	-	-
sv_25548	15	25541	25541	102	INS	T	TATTCAATCATGCTGCATGGAGTTCACTGCATCCAATCACAATGCATGGACTCCACTGCATTCAATCGGGATGCTTTGGGCCATGCTGCATAAATTCCACTGC	-	intergenic_variant	MODIFIER	-	-	-	-
sv_25569	15	27342	28424	1082	DUP:TANDEM	GTCAATCACGCTGCATGGAATCCACTGCATTCAATCGGGATGCTTTGGGCCATGCTGCATAAAATCCACTGCATTCAATCATGCTGCATGGAATCCACTGCATTCAATCATGCTTCATAAAATCCACTGCATTCAATAGGGTTCCATTTCTTCACGCTGCATGGAATACACAGCATTCAATCACGCTGCATGGAATCCGCTGCATTCAATCGGGATGCATTTTTCCACGCTATATTGAGTGCACTGCATTCAATCACAATGCATGGAATCCACTGCATTCACTCGGGATCCATTTCACAACGCTGCATGGAATCCACTGCATTGAATCTCGATGCATGGAATCCACTGCATTACATTGGTATCAATTACACAATGCTGCAGGGAATCCACTGCATTCAG…	GTCAATCACGCTGCATGGAATCCACTGCATTCAATCGGGATGCTTTGGGCCATGCTGCATAAAATCCACTGCATTCAATCATGCTGCATGGAATCCACTGCATTCAATCATGCTTCATAAAATCCACTGCATTCAATAGGGTTCCATTTCTTCACGCTGCATGGAATACACAGCATTCAATCACGCTGCATGGAATCCGCTGCATTCAATCGGGATGCATTTTTCCACGCTATATTGAGTGCACTGCATTCAATCACAATGCATGGAATCCACTGCATTCACTCGGGATCCATTTCACAACGCTGCATGGAATCCACTGCATTGAATCTCGATGCATGGAATCCACTGCATTACATTGGTATCAATTACACAATGCTGCAGGGAATCCACTGCATTCAG…	-	intergenic_variant	MODIFIER	-	-	-	-
sv_25584	15	29401	29999	598	DUP:TANDEM	GCAATCAGGATCCATTGCGCCACAATGCATGGAATCCTCTGCATTCAAAAATGCTGCATGGAATTGACTGCATTCAATCGGGATGCATTGGGCCTCGCTGCATGGACTCCACTGCATACAATCGGGATCCATTGCGCCACAATGCATGGAATCCTCTGCATTCAATGACGCTGCATGGAATCCACTGCATTCAATCGGGATGCTTTGGGCCATTCTGCATAAAATCCACTGCATTCAATCATGCTGCATGGAATCCACTGCATTCAATCAGGCTGCATACAATCCACTGCATTCAATAGGGTTCCATTTCTTCACGCTGCATGGAATACACGGCATTCAATCACGCTGCATGGAATCCACTGCATTCAATCGGGATGCATTTTACCTCACTGCATGGAG…	GCAATCAGGATCCATTGCGCCACAATGCATGGAATCCTCTGCATTCAAAAATGCTGCATGGAATTGACTGCATTCAATCGGGATGCATTGGGCCTCGCTGCATGGACTCCACTGCATACAATCGGGATCCATTGCGCCACAATGCATGGAATCCTCTGCATTCAATGACGCTGCATGGAATCCACTGCATTCAATCGGGATGCTTTGGGCCATTCTGCATAAAATCCACTGCATTCAATCATGCTGCATGGAATCCACTGCATTCAATCAGGCTGCATACAATCCACTGCATTCAATAGGGTTCCATTTCTTCACGCTGCATGGAATACACGGCATTCAATCACGCTGCATGGAATCCACTGCATTCAATCGGGATGCATTTTACCTCACTGCATGGAG…	-	intergenic_variant	MODIFIER	-	-	-	-
sv_25599	15	32369	32369	144	INS	G	GGGATCAATTGCGCCACAATGCATGGAATCCTCTGCATTCAAAAATGCTGCATGGAATTGAATGCATTCAATCGGGATGCATTGGGCCTCGCTGCATGGACTCCACTGCATACAATCA	-	intergenic_variant	MODIFIER	-	-	-	-
sv_25604	15	33815	33815	118	INS	A	ACCCGGGATGAATTTCACACTGCTGCAAGGAATCAAGTGCATTCAGTCACACTGCATGTATTCCACCGCACACCACCAGCAAACATCGCCCCATGCTCCACGCACTCCCCAGCATTCG	-	intergenic_variant	MODIFIER	-	-	-	-
sv_25694	15	4494390	4494390	109	INS	A	AATATTTATAAAAATTACTATAATGTGCCCAGCGCTTTGAAAATAGAGCATGTATTCTACCTTATGCACAATGTATAACTCAGTTGTGTTGCAAAAACTAACAGGCAGGG	-	intergenic_variant	MODIFIER	-	-	-	-
sv_25804	15	13588231	13588308	77	DEL	ATGCCACTAAATATGTCCTGTGTATTCCCCTGTTCTTATAAAAGTGTGCGCTAAAGTGTATTTTAAAATTCTGTGATG	A	-	intergenic_variant	MODIFIER	-	-	-	-
sv_26047	15	28577142	28577427	285	DEL	ACAAAAACCAGGAGTTCCCGTTGTGGCGCAGTGGTTAACGAATCCGACTAGGAACCATGAGGTTGCGGGTTCGGTCCCTGCCCTTGCTCAGTGGATTAACGATCCGGCGTTGCCGTGAGCTGTGGTGTAGATTGCAGATGCGGCTCAGATCCTGAGTTGCTGTGGCTCTGGTGTAGGCCGGTGGCTACAGCTCCGATTCGACCCCTAGCCTGGGAACCTCCATATGCCGCGGGAGTGGCCCAAGAAATAGCAACAACAACAACAACAACAACAACGAAAAAGAGAC	A	-	intergenic_variant	MODIFIER	-	-	-	-
sv_26113	15	31929311	31929311	75	INS	G	GCCCTCAAAATATCCTGAACTCCCCAAACCAAAATTACAAAGCAATGTGTGTGTGTGTGTGTGTCTTTTTAGGGCC	-	intergenic_variant	MODIFIER	-	-	-	-
sv_26196	15	40005181	40005238	57	DEL	AGGTTGCTGTGGCTCTGGTGTAGGCAGGGGGCTACAGCTGCGATTGGACCCCTAGCCT	A	-	intergenic_variant	MODIFIER	-	-	-	-
sv_26281	15	48464131	48464425	294	DEL	GAAAAAAAAAGGTGGGGAGTTCCCGTCGTGGCGCAGTGGTTAACGAATCCAACTGGGAACCATGAGGTTGCGGGTTCGGTCCCTGCCCTTGCTCAGTGGGTTGACGATCCAGCGTTGCCGTGAGCTGTGGTGTAGGTTGCAGACGCGGCTCGGATCCCGCGTTGCTGTGGCTCGGGCTTAGGCCGGTGGCTATTGCTCCGATTCAACCCCTAGCCTGGGAACCTCCATATGCCAAGGGAGCGGCCCAAGAAATAGCAACAACAGCAACAACAAAAAGACAAAAGACAAAAGACAA	G	-	intergenic_variant	MODIFIER	-	-	-	-
sv_26310	15	52486663	52487208	545	DEL	CTACACCACAGCTCATGGCAATGCCAGATCCTTAACCCACTGAGTAAGGCCAGGGATTGATCCCTTGTCCTCTTGGATACTAGTCAGGTTCATTAACCATTGAGCCGCAATGGGAACTCCCCCTGTTAATTTGTACATATGGTTTTGTTTTGGTTAAAGAATGTATACTCTCAACTCTACTAGATGTTGTCAAATTGTTCTTGAAAGTAGTTACAGGAATATGTACTCAGAAGGGCAATGTATTAGAGTTACTGTTGTTTCACATCCTTGCTGACATCTGCTATTGTCAACCCATTAACGTCTCTGCCAATCTAATGGTATCTCATTATAGTTTTAATATTCATGCCTCTGATTTCTAATGAGGTTAAGCATGTTATTGGTAAGGTCTATATCTTTTAT…	C	-	intergenic_variant	MODIFIER	-	-	-	-
sv_26365	15	58916786	58916847	61	DEL	GTAAGATCATACCTTTGTTTACAACACAACTTTTTTTTTTTTTGAGTGAGGAAAACAATACA	G	-	intergenic_variant	MODIFIER	-	-	-	-
sv_26392	15	63805094	63805094	60	INS	G	GAACCACTGCAGGTTTCACTGGGGGTTCCTTGGGTTAGATGCTTTATGAAGACAAATGTGA	-	intergenic_variant	MODIFIER	-	-	-	-
sv_26441	15	70558224	70558322	98	DEL	CTAGTAGCTAATAAATGTTAACTGCTCACTCCCCCTTTTTTTGGACCAGTAACACAGCATCACCATACCTTTGAACAAAACCTTGCTTGAATTTCCACA	C	-	intergenic_variant	MODIFIER	-	-	-	-
sv_26455	15	72735484	72735757	273	DEL	GACTTTTTTTTTTTTTTTTTTTGTCTTTTTGCTATTTCTTTGGGCCGCTCCCGCGGCATATGGAGGTTCCCAGGCTAGGGGTCGAATTGGAGTTGTAACCACTGGCCTACGCCAGAGCCACAGCAACGCGGGATCCGAGCCGCGTCTGCAACCTACACCACAGCTCACGGCAACGCCGGATCGTTAACCCACTGAGCAAGGGCAGGGACCGAACCCGCAAGCTCATGGTTCCTAGTCGGATTCGTTAACCACTGCGCCACGACGGGAACTCCCC	G	-	intergenic_variant	MODIFIER	-	-	-	-
sv_26575	15	86222874	86223048	174	DEL	CTCACAAACTCTGCCACTACTTTATCAACTAAGTTTTATGTAATATTATAAATCCTTTGTTGTCATTTCAACATCTTCACAACCTCTTTACCAAGAGTAAATTCTATCTCAAGAAACCAGTTTATTCACTTATCCATAATTAGCAACTTTGTTTGTTCAGTTTTTTTTTAACAAT	C	-	intergenic_variant	MODIFIER	-	-	-	-
sv_26579	15	86657316	86657316	70	INS	G	GGAAATTAGAATGGAGCTGAAGTCTCACATTTGTAAAGGCAAGGCATAACCATGGGGGATATAAACATATA	-	intergenic_variant	MODIFIER	-	-	-	-
sv_26581	15	86748793	86749170	377	DEL	GGAAGGGTTCTGGCTTTGGGTGAAAGTGATGATTTTAAGGAGATAATCCTGGAAAGGGTCCCACATAAAGGTGTCAGATATTGAGATAGTGGATTAACTTTGTGATTACTTGTCAATGTGTCACTCTGAGAAGGCACAAGGTAGAAAGAGAAGGCTGAATCATGATGTGATGACACTTGAGTCACTTGGAGACTGAAAAGAAGCATTAAATTAGGATGTCGATGCAGAATGATAGAGAGAACATAGGAAAGCAAAGTGCCTGCTTCACACTCATGGCAAGGGAAACCCTGACCAAAAGCATTTGAATGAAAGGGTCATACAGGTTTATCAGTCAGAGCCAGAGAACCTGGAAGCCCACGTGACTATTACAAGCAGAGA	G	-	intergenic_variant	MODIFIER	-	-	-	-
sv_26596	15	88823360	88823442	82	DEL	AGCCTCTATGGAGAAATCAAATGATAACTTTATGGGAGTTCCCTTGTAATAAACTCTTTGTTTTTTTCTCTTGCTGCCTTCTG	A	-	intergenic_variant	MODIFIER	-	-	-	-
sv_26608	15	90482946	90483169	223	DEL	TTTTTTTTTTTTTTTTTTTTTTTTTTTTTTTTTTTTTTTTTGTGTGAAATAAAAAGAAGTGTAATATGAGACCTTATTCTCAAGAAGTTTGCACTTTAGTTGGGGAAATAACAATATAGTGTACAAAATAGTTGCCCCCCTGATCTATTCAGAATCCGTTCCTTTCATTTTGCATTTTAGATGAACAATGAATTTTTTTAGCATAAGTTTGTTCCAAATGTTGA	T	-	intergenic_variant	MODIFIER	-	-	-	-
sv_26687	15	100239607	100239943	336	DEL	CAATATGGTCAAAGATAGGAGTTCCCGTCGTGGCGCAGTGGTTGACGAATCCGACTAGGAACCATGAGGTTGCGGGTTCGGTCCCTGCGCTTGCTCAGTGGGTTAATGATCCGGCATTGCCGTGAGCTGTGGTGTAGGTTGCAGATGCGGCTCGGATCCTGCGTTGCTGTGGCTCTGGCATAGGCTGGTGGCTACAGCTCCAATTCGACCCCTAGCCTAGGAACCTCCATATGCCGTGGGAGCGGCCCAAGAAATAGCAAAAAGACAAAAAAAAAAAAAAAAAAAAATATGCTGCAGGTGTGGCTCTAAAAAGCAAAAAGCAAAAAAAAAAAAAAAA	C	-	intergenic_variant	MODIFIER	-	-	-	-
sv_26715	15	103664666	103664877	211	DEL	AATTCAGTCCCTAGCCTGGGAATTTCCATATGCTGCATATTGACCCTAAAAAGCAAAAAGAAAGGAAGGAAGGAAGGAAGAAAAAGAAAAAAGAGTCTGACTGCAATGGCGCAGGTTACTGCAGAGGCATGGGTTCGATTCCCCACCCAGTGCAGTGGGTTAGGGGATCCAGCATTGCCACAACTGTGGCATAAGTCACAGCTGTGGCTCAG	A	-	intergenic_variant	MODIFIER	-	-	-	-
sv_26751	15	105620949	105621226	277	DEL	AAAAAGAAATTTGGAGTTCCCGTCGTGGCGCAGTGGTTAACGAATCCGACTAGGAACCATGAGGTTGCGGGTTCGGTCCCTGCTCTTGCTCAGTGGGTTAACGATCCGGCGTTGCCGTGAGCTGTGGTGTAGGTTGCAGACGCGGCTCGGATCCCGCGTTGCTGTGGCTCTGGCGTAGGCCGGTGGCTACAGCTCCGATTAGACCCCTAGCCTGGGAACCTCCATATGCCGCGGGAGCGGCCCAAGAAATAGCAAAAAGACAAAAAAAAAAAAAAAAG	A	-	intergenic_variant	MODIFIER	-	-	-	-
sv_26794	15	108938341	108938416	75	DEL	CAAAAACCACTCCTCGGCAGAATAAATGGCAGAAAAGATGTGGCGCTACCTTCTCTCACAAACACATGAAAAAGAA	C	-	intergenic_variant	MODIFIER	-	-	-	-
sv_26868	15	114706645	114707427	782	DEL	CAATGTGATACACAACATCAATAAACTAAAAACTCATGTGATCATCTCAATAGATGCAGAAAAAGTTTTTGACAAAGTTCAACACCCATTCCTGATAAAAAAAACTCTCCAGAGAGTGGGCATAGAGTGGAACTACCTCAATATAGTAAAAGCCACTTATGACAAACCCACAGCTAACATTATTCTCAATGGTGAAAAACTGAAAGCATTTCCACTAAGATCAGGAACAAGACAACAATCAGGGAAGGGAAAAATAAAAGGAATCCAAATTGGAAAAGAAGAAGTAAAACTACCACTGTATGCACATGACATGATACTATACCTAGAAAATCTTAAAGACACTACCAGAAAAGTGTTAGAGCTCATAAACAAATTCAGTAAAGTTGCAGAATACAAAAG…	C	-	intergenic_variant	MODIFIER	-	-	-	-
sv_26959	15	122389160	122389241	81	DEL	TCATCATCACCACCACCACCACCATCACCATCATCACTGTCACCACCATAACCCTCATTATCATTATCATCATAACTATCAC	T	-	intergenic_variant	MODIFIER	-	-	-	-
sv_26970	15	122901270	122901352	82	DEL	AAGCCAGAAGGCCATTATAGCAGTTGCTCAGCAAGTGTAAAATCCTTGTTTAGCCACCTAAGTCATAGTTCCTGGTGTCCTTC	A	-	intergenic_variant	MODIFIER	-	-	-	-
sv_26984	15	123950510	123950646	136	DUP:TANDEM	ATAGACATAGACTCTACAAATAAAATGGCCTCACAGAGCTTATATTCAAGTGGAGGAAAGTGTATAATGAATAAACAAATATGTAAGTATAATATATAGTATGTCAGATAGTGATAAATTCTACAAAGAAAATAAAA	ATAGACATAGACTCTACAAATAAAATGGCCTCACAGAGCTTATATTCAAGTGGAGGAAAGTGTATAATGAATAAACAAATATGTAAGTATAATATATAGTATGTCAGATAGTGATAAATTCTACAAAGAAAATAAAATAGACATAGACTCTACAAATAAAATGGCCTCACAGAGCTTATATTCAAGTGGAGGAAAGTGTATAATGAATAAACAAATATGTAAGTATAATATATAGTATGTCAGATAGTGATAAATTCTACAAAGAAAATAAAA	-	intergenic_variant	MODIFIER	-	-	-	-
sv_27064	15	126758472	126759215	743	DEL	CGTCTGCAACCTACACCACAGCTCACGGCAATGCCGGAGCGTTAACCCACTGAGCAAGGGCAGGGACCGAACCCGCAACCTCATGGTTCCTAGTCGGATTCGTTAACCACTGCGCCACGACGGGAACTCCTAAAATTTTACTGTTTTTTTCTCTTTGCCCCTCTTGCTACTCTGCTGTACAAGGCAACATTTTTCCTGTGTCCCCATTTCTCCTCAGAAGTCCTTGTACATTTTGTCACTTATTTCATCAAGTTGTTTTGAGATGGCAGCTCTCAGGTGAGCTTACAACATGGTTTAGACTCTGTGAACTGTCGGGTTTGTTCTAGATGTTGGGTAGGAATGGCATTCTCTCAGAATATTCTGCTTTGTCAGTGGACTGAAATAGAATTTTAATAAAAA…	C	-	intergenic_variant	MODIFIER	-	-	-	-
sv_27066	15	126841493	126841627	134	DEL	ATTTCTTTCTTTCTTTTTTTTTTTATTTTCTCTTTAAAGGAAATTGGTTAAATTTTTTTTTTTTTCCCACTGTACAGCAAGGGGGTCAGGTTATCCTTACATGTATACATTATAATTACAGTTTTTCCCCCACCC	A	-	intergenic_variant	MODIFIER	-	-	-	-
sv_27119	15	129585916	129585996	80	DEL	TTTAATATAAAAACATTGACTTTCAGATGCTGGGTAATAATTAAAATTCCACTTCCCAGGTGGCAACACTATTTGCTAGCC	T	-	intergenic_variant	MODIFIER	-	-	-	-
sv_27139	15	130348077	130348077	67	INS	G	GAGAGATTAACTCATGAGCCCAAACTCCCAGTTTGCTCGTGATAGGCTTGGACCTGATCTCCAGAACC	-	intergenic_variant	MODIFIER	-	-	-	-
sv_27234	15	134739012	134739686	674	DEL	CGGATCCTTGACCCACTGAGTGAGGCCAGGGATCGAACCCGCATCCTCTTGGATCCTAGTGGGGTTCGTTAACTGCTGAGCCACAGCTCCTGGAAACTCCTGAAACCTGTACCCTCTTAACAGTCTCTCCCCACTCTCCCTGCCCCTGGTCTCTGGCAAACAAGTCTACTTTCTCTCTTTGTGGATTTGCTTTTCTGGGTATTTCTGATAAATGGACTCATGCAACATGTGAATTTTGTGTCTGGATTTTTCCTTCAACTTTCCTTTGTTTGTTGTCTGGCATGCACAGCTCTCTGGTGATGTTAAGAGAAATTATAACTCTGCAGATTATCTGGTGTGGTGTTGTTGTTAAGATGTATTTTCCATCTTTCTACATCTTAAACAGAAGCAGAAAGTCCA…	C	-	intergenic_variant	MODIFIER	-	-	-	-
sv_27403	16	12187	12348	161	DUP:TANDEM	ACAATCCACTGCATTCAATCGGGATGCACTGGGCCTCGCTGCATGGACTCCACTGCATATAATCGGGATCCATTGCGCCACAATGCATGGAATACTCTGCATTCAATGACGCTGAATGGAATCCACTGCATTGAATCGTGAAGCTATGGGCCATGCTGCATA	ACAATCCACTGCATTCAATCGGGATGCACTGGGCCTCGCTGCATGGACTCCACTGCATATAATCGGGATCCATTGCGCCACAATGCATGGAATACTCTGCATTCAATGACGCTGAATGGAATCCACTGCATTGAATCGTGAAGCTATGGGCCATGCTGCATACAATCCACTGCATTCAATCGGGATGCACTGGGCCTCGCTGCATGGACTCCACTGCATATAATCGGGATCCATTGCGCCACAATGCATGGAATACTCTGCATTCAATGACGCTGAATGGAATCCACTGCATTGAATCGTGAAGCTATGGGCCATGCTGCATA	-	intergenic_variant	MODIFIER	-	-	-	-
sv_27419	16	12837	13896	1059	DUP:TANDEM	TGCATGGAATACACTGCATTCAATCACGCTGCATGGAATCCACTGCATTCTATCGGGATGCATTTTACCTCGCT	TGCATGGAATACACTGCATTCAATCACGCTGCATGGAATCCACTGCATTCTATCGGGATGCATTTTACCTCGCTGCATGGAATACACTGCATTCAATCACGCTGCATGGAATCCACTGCATTCTATCGGGATGCATTTTACCTCGCT	-	intergenic_variant	MODIFIER	-	-	-	-
sv_27437	16	13571	13805	234	DEL	TCAATCGGGATGCATTGGGCCTCGCTGCATGGACTCCACTGCATTCAATCGGGATCCTTTGTGCCACAATGCATGGAATTCTCTTCATTCAATGACGCTGCATCGAATCCACTGCATTCAATCGGAATCCATTGTGCTACAATGCATGGAATCCTCTGCATTCAATGACGCTGCATGGAATCCACTGCATTCCATCAGGATGCTTTGGGCCATGCTGCATAAAATCCACTGCATG	T	-	intergenic_variant	MODIFIER	-	-	-	-
sv_27504	16	16482	17124	642	DUP:TANDEM	GGGATGCTTTGGGCCATGCTGCATAAAATCCACTGCATTCAATCAGATGCATTTTGCCTCGCTGCATAGACTCCACTGCATACAATCGGGATCCATTTCGCCAAAATGCATTGAATCTTCTGCATTCAATTACGCTGCATGGAATCCACTGCATTCAATCGGGATATTTTGGGCCATGCTGCATAAAATCCACTGCATGCAATCCTGCTGCATGGAATCCACTGCATTCAATCATGCTGCATAAAATCCACTGCATTCAATAGGGTTCCATTTCTTCACGCTGCATGGAATCCACTGCATTCAATCACGCTGCATGGAATCCACTGCATTCAACATGGATGCATTTTACCACGCTGCATAGATTACACCGCATTCAATCACAATGCATGGAATCCACTG…	GGGATGCTTTGGGCCATGCTGCATAAAATCCACTGCATTCAATCAGATGCATTTTGCCTCGCTGCATAGACTCCACTGCATACAATCGGGATCCATTTCGCCAAAATGCATTGAATCTTCTGCATTCAATTACGCTGCATGGAATCCACTGCATTCAATCGGGATATTTTGGGCCATGCTGCATAAAATCCACTGCATGCAATCCTGCTGCATGGAATCCACTGCATTCAATCATGCTGCATAAAATCCACTGCATTCAATAGGGTTCCATTTCTTCACGCTGCATGGAATCCACTGCATTCAATCACGCTGCATGGAATCCACTGCATTCAACATGGATGCATTTTACCACGCTGCATAGATTACACCGCATTCAATCACAATGCATGGAATCCACTG…	-	intergenic_variant	MODIFIER	-	-	-	-
sv_27516	16	17025	17025	143	INS	C	CTGCATGGAATCGACTGCATTTAATCACGCTGCATGGAATCCACTGCATTCAATCGGGATTCATTTTACAAGGCTGCATGGAGTACACTGCATTCAATCACAA	-	intergenic_variant	MODIFIER	-	-	-	-
sv_27590	16	20365	20365	117	INS	C	CTGCATACAATCGGGATCCATTGTGCCACAATGCATGGAATCTTCTGCATTCATTGATGCTGCATGGAATCCACTGCATTCAATTGGGATGCTTTGGGCCATGCTGCATATAATCCAG	-	intergenic_variant	MODIFIER	-	-	-	-
sv_27599	16	20858	21106	248	DUP:TANDEM	AATCACAATGCATGGAATCCACTGCATTCAAACGGGATGCTTTGGGCCATGCTGCATAAAATCCACTGCATTCAATCATGCTGCATGGAATCCACTGCATTCAATCATGCAGCATAAAATCCGCTGCATTCCATAGGGTTCCATTTCTTCATGCTGCATGGAATACACTGCATTCAATCAGGCTGCATGGAATCCACTGCATTCAATCGGGATGCATTTTTCCTCGTTGCATGGATTACACTGCATTCC	AATCACAATGCATGGAATCCACTGCATTCAAACGGGATGCTTTGGGCCATGCTGCATAAAATCCACTGCATTCAATCATGCTGCATGGAATCCACTGCATTCAATCATGCAGCATAAAATCCGCTGCATTCCATAGGGTTCCATTTCTTCATGCTGCATGGAATACACTGCATTCAATCAGGCTGCATGGAATCCACTGCATTCAATCGGGATGCATTTTTCCTCGTTGCATGGATTACACTGCATTCCATCACAATGCATGGAATCCACTGCATTCAAACGGGATGCTTTGGGCCATGCTGCATAAAATCCACTGCATTCAATCATGCTGCATGGAATCCACTGCATTCAATCATGCAGCATAAAATCCGCTGCATTCCATAGGGTTCCATTTCTTCA…	-	intergenic_variant	MODIFIER	-	-	-	-
sv_27690	16	2911172	2911334	162	DEL	GATATCACTTATATCTGGAATCTAATATACAGCACAAATGAACCTTTCCACAGAAAAGAAAATCATGGACTTGGAGAATAGACTTGTGGTGCCAAGGGGGAGGGGGAGGGAGTGGAATGGATTGGGAGCTTGGGATTAATAGATGCTAACTATTGCTTTTGGA	G	-	intergenic_variant	MODIFIER	-	-	-	-
sv_27948	16	15553560	15553742	182	DEL	TCCTCTGCTAAGAATTGACCTCCAGACCCTGAGCCTCAGTGCCCCACCCAAGTGTCTCAGGCTGTGGTGTCTGGGGTGGTGGTGCAGGTAATCTGTGTGGCTCTCACTCTGCTTTGCCCACCTCAGTCCAGCTATTGCACTTTTCTTGGAAACTTTGAGGTCCCTCTGTCTCAGGTGACCTCC	T	-	intergenic_variant	MODIFIER	-	-	-	-
sv_27980	16	18161932	18162008	76	DEL	GGAGGCAAGAAATGACCTTTCTAAGAACTTCCTCTTGCCAAGCGTTTAAAATGCGCATTAGGGGCTCAGTGGTTAAC	G	-	intergenic_variant	MODIFIER	-	-	-	-
sv_28010	16	19933637	19933637	67	INS	T	TTGAGGAGAGATTTTTTAAAGACCCAAATCAAACTTCTTGGGGAGGTAAAATTTTAAAAAAATGTCTG	-	intergenic_variant	MODIFIER	-	-	-	-
sv_28205	16	34368871	34369177	306	DEL	TGGAGTTCCCGTCGTGGCACAGTGGTTAACGAATCCGACTAGGAACGATGAGGTTGCGGGTTCGATCCCTGGCCTTGCTCAGTGGGTTAAGGATCCGGCGTTGCCGTGAGCTGTGGTGTAGGTCGCAGACGCGGCTCGGATCCCGCGTTGCTGTGGCTCTGGCATAGGCTGGCAGCTACAGCTCTGATTAGACCCCTAGCCTGGGAAATTCCATATGCCGCAGGAGCGGCCCAAGAAATAGAAAAAAGACAAAAAAAAAAAAAAAAAAAAAAAGAAATATTTCTGGGAGTGCCCGTCGTGGCACATC	T	-	intergenic_variant	MODIFIER	-	-	-	-
sv_28300	16	43637693	43638531	838	DEL	GGGCATTTGGTAACAAAGAACAGTCTAACCCATTGATGTTAATTTACCAAATTATTCACATCCCACAATCTGGAATAGAAATCAGCGGCCAAAAAAATGCCTCCTCTACACCTCAGTCAAAACACCTATAAAAATCTAGATACCAGGAGGCAAAGTCTGGAACATAAACTACTTCATCCTGTTGCCAGTGAGTTATTAAAGTACAGAATGATGGAGCTGCCAGGGGTGTCTGGGCAGCCTCTGCTTCCAAGCTTCATTCTTGGTGGTGTCTTTAAAAAGATATATTTGGTCAAAATATATTGGTGACAACTCCTTTCTTTTAAAATCCAGTTAGGGATACAATTCATATATTTCATTTAACCCTTAGAGATCCCTGGAACTTTAAAATCTCTCTAGTAG…	G	-	intergenic_variant	MODIFIER	-	-	-	-
sv_28338	16	48102040	48102351	311	DEL	ATTTTTTTTTTTTTTTTTTTTTTTTTTTTGCTTTTTAGGGCCGAATTTGAGGCATAGGGAAGTTCCTAGGCTAGAAGTTGAATTGGAGCTGCAGCTGCCAGCCTACACCACAGCTCACGGCAGCACCGGATCCTTAACCCACTGAGCAAAGGCCAGGAATGGAACCCAAATCCTCATGGATGCTAGTTGGGTTCATTGCCGCTGAGCCACAATGCGAAATCCCTGTGTAATTTGATTAAAAAAAAATCTTATTGGGGTATAGTTGATGTACAGTGTTGTATTAGCTTCAGGTTTATAGGCTTTTTGGTTTTT	A	-	intergenic_variant	MODIFIER	-	-	-	-
sv_28424	16	57779405	57779494	89	DEL	ATATATATATAAGTATATATATATATATAGTGCTTACACTTTTATTGAGTGGTGAGTTTATTAACAGTTCTTTCTTAGTAACACACCAAC	A	-	intergenic_variant	MODIFIER	-	-	-	-
sv_28485	16	61944992	61945236	244	DUP:TANDEM	CTCATGTATATAATGTGTCATTCTCTCTGTACTTTAAATCTTTAAAGATTTTCTCTTCATTTTAATTTTCAGTAATTGGATAATGATGTATCAAATGAAGTTTATTTTATATTTGTCTGTCTTGGGGTTTGCTAAGGAGCTTTTTTGAAGAATTTAATTTCTGCCTTTCATCAAATTTTGGAAACATTTTTCCTGCCCCATTCTCTCCTATACCCCTAATACTCCTACTTATACCTGTGTTAGAC	CTCATGTATATAATGTGTCATTCTCTCTGTACTTTAAATCTTTAAAGATTTTCTCTTCATTTTAATTTTCAGTAATTGGATAATGATGTATCAAATGAAGTTTATTTTATATTTGTCTGTCTTGGGGTTTGCTAAGGAGCTTTTTTGAAGAATTTAATTTCTGCCTTTCATCAAATTTTGGAAACATTTTTCCTGCCCCATTCTCTCCTATACCCCTAATACTCCTACTTATACCTGTGTTAGACCTGTGTCATGTATATAATGTGTCATTCTCTCTGTACTTTAAATCTTTAAAGATTTTCTCTTCATTTTAATTTTCAGTAATTGGATAATGATGTATCAAATGAAGTTTATTTTATATTTGTCTGTCTTGGGGTTTGCTAAGGAGCTTTTTTGAAG…	-	intergenic_variant	MODIFIER	-	-	-	-
sv_28705	16	74906586	74906586	104	INS	G	GCTGAAACACACTTTCTGGCTGTAGAGGGTGTCCCCTGAATATCTATTACAAACTCAGTGCAAAGGAATAATAAATGTGACGCATCCTTGATGCCTGACTTGACT	-	intergenic_variant	MODIFIER	-	-	-	-
sv_28723	16	75818449	75818549	100	DEL	TCTCCATCTATTTCAAAGGGCAGCTAGATCGTATATGGGGCCAGCTTACAGAAGACACAGCGATTTCTCTCACGTGGGCACTTGCAGTGAATCATCCACTG	T	-	intergenic_variant	MODIFIER	-	-	-	-
sv_28752	16	77871820	77872126	306	DEL	ATGCGGTAGACGCCCAGCAGAGGGATTGCGGGTCATGCGGTAGGTGCCCAGCAGTGGGATTGCGGGTCATGCGGTAGGTGCCCAGCAAAGGGATTGCGGGTCAAGTGGTAGGTGCCCAGCAGTGGGATTGCGGGTCAAGTGGTAGACGCCCAGCAGAGGGATTGCAGGTCATGTGGTAGGTGCCCAGCAGAGGGATTGCGGGTCACGCGGTAGACGCCCAGCAGAGGGATTGCGGGTCACGCGGTAGACGCCCAGCAGAGGGATTGCGGGTCAAGTGGTAGGTGCCCAGCAGAGGGACTGCGGGTCT	A	-	intergenic_variant	MODIFIER	-	-	-	-
sv_28762	16	78958241	78958317	76	DEL	ACCCCGTGAGGTGTGGGAGGAGCCGAGGAGCCCCCAGCTCCCGAGTGCCCTCATTGCCATGCCTGGAGGCCACAGAG	A	-	intergenic_variant	MODIFIER	-	-	-	-
sv_28788	17	1160660	1160947	287	DEL	TTAAACTAGAAAAGAGGAGTTCCCGTCGTGGCACAGTGCTTAACGAATCCGACTAGGAACCATGAGGTTGTGGGTTCGGTCCCTGCCCTTGCTCAGTGGGTTAACGATCCGGCGTTGCCGTGAGCTGTGGTGTAGGTTGCAGGCGCGGCTCTGATCCCGAGTTGCTGTGGCTCTGGCGTAGGCCGGTGGCTACAGCTCCGATTCAACCCCTAGCCTGGGAACCTCCATATGCCACAGGAGCGGCCCAAGAAATAGCAAAAAGACAATAAATAAATAAGAAATAAAAAA	T	-	intergenic_variant	MODIFIER	-	-	-	-
sv_28840	17	3630172	3630932	760	DEL	TCAGCAGTGAAAAAGAATGAAGTGCTGATAACTTGCTACAATGAGAACAAACCTTGAAAACATTTTGCTAACTGAAAGGAGCCAGATGCAAAAGGCCACATAAAATATCATTCCATTTATAGGAAATGTCAATAATAGATAAATCTATAGAGAAATAAAGTAGGTTAATGGTTGCCTGGGAGTAATATTTGGAGATAGATAATTTAATCTTTTGTTCCAAAGCTTAAGTATAACATTTAATATTATAAATAGTAAAGAAACTTTCTTCTGTTTCAACATTTTCTTTTCTATGGTAGTACATTTATTTCAGCAGAAATAAATTCTTTCTAAAAATATCAGGGGATGTTGCTTTCTAAAACCATCAAGATCCATCCCACCAAAAAATGATTTAATAGAGAT…	T	-	intergenic_variant	MODIFIER	-	-	-	-
sv_28944	17	8155764	8155821	57	DEL	GATGGGAGATAAAAAAAAGAAGAACAAGATGGGTAGGTATTTTAAAAATGTAGATACC	G	-	intergenic_variant	MODIFIER	-	-	-	-
sv_28951	17	8368432	8368735	303	DEL	TAAAACTTTACCGAGGGAGTTCCCGTCGTGGCGCAGTGGTTAACGAATCCGACTAGGAACCATGAGGTCGCGGGTTCGGTCCCTGCCCTTGCTCAGTGGGTTAACGATCCGGCGTTGCCGTGAGCTGTGGTGTAGGTTGCAGACGCGGCTCGGATCCCACCTTGCTGTGCCTCTGGTGTAGGCCGGTGGCTACAGCTCCGATTCAACCCCTAGCCTGGGAACCTCCATATGCCGCGGAAGCGGCCCAAGAGATAGCAACAACAACAACAAAGACAAAAGACAAAAAAAAAAAAAAAAAAAAAAA	T	-	intergenic_variant	MODIFIER	-	-	-	-
sv_29060	17	14333955	14333955	51	INS	T	TATGGGACCTGAGGGTCTATATTTCTGGACTTCAGGTCCCATATATGTCTAG	-	intergenic_variant	MODIFIER	-	-	-	-
sv_29491	17	43382962	43383266	304	DEL	TTAAATTTTCTTTTTTTTTTTTTTTTCTTTTGTCTTTTGTCTTTTTGTTGTTGTTGTTGTTGTTGCTATTTCTTGGGCCGCTCCCGCGGCATATGGAGGTTCCCAGGCTAGGGGTTGAATCGGAGCTGTAGCCACCGGCCTACACCAGAGCCACAGCAACGCGGGATCCGAGCCGCGTCTGCAACCTACACCACAGCTCACGGCAACGCCGGATCGTTAACCCACTGAGCAAGGACAGGGACCGAACCCGCAACCTCATGGTTCCTAGTCGGATTCGTTAACCACTGCGCCACGACGGGAACTCC	T	-	intergenic_variant	MODIFIER	-	-	-	-
sv_29593	17	49445626	49445912	286	DEL	CAAAAATATGACTGGGAGTTCCCGTCGTGGCGCAGTGGTTAACGAATCCGACTAGGAACCATGAGGTTGCGGGTTCGGTCCCTGCCCTTGCTCAGTGGGTTAAGGATCCGGCGTTGCCGTGAGCTGTGGTGTAGGTTGCAGACGCGGCTCGGATCCCGCGTTGCTGTGGCTCTGGCGTAGGCTGGTGGCTACGGCTCCGATTCAACCCCTAGCTTGGGAACCTCCATATGCTGCGGGAGCGGCCCAAGAAATAGCAACAACAACAAAAAGACAAAAAGACAAAAAAA	C	-	intergenic_variant	MODIFIER	-	-	-	-
sv_29621	17	51768857	51769131	274	DEL	TAAAAAAAATTTTTTTTTCTTTGTCTTTTTTTTTGCTATTTCTTGGGCCGCTCCTGCGGCATATGGAGGTTCCCAGGCTAGGGGTCCAATCGGAGCTGTAGCTGCCAGCCTACGCCAGAGCCACAGCAACGCGGGATCCGAGCCGCGTCTGCAACCTACACCACAGCTCATGGCAACGCCGGATCCTTAACCCACTGAGCAAGGGCAGGGATCGAACCCGCAACCTCATGGTTCTTAGTCGGATTCGTTAACCACTGCGCCACGACGGGAACTCC	T	-	intergenic_variant	MODIFIER	-	-	-	-
sv_29693	17	57104707	57104978	271	DEL	TTAAAAGTGAATTTTGGGGAGCTCCCCTCGTGGTGCAGTGGTTAACAAACCCGACTAGGAACCATGAGGTTGCGGGTTCCGTCCCTGGCCTTGCTCTGTGGGTTAAGGATCTGGCGTTGCCGTGAGCTGTGGTGTAGGTTGCAGACGCGGCTCGGATCCAGCGTTGCTGTGGCTCTGGCGTAGGCCAGTGGGTGGCTACAGCTCTGATTCAACCCCTAGCCTCCATATGCTGCGAGAGCGGCCCAAGAAAATGGCAAAGAGACCAAAAAAAA	T	-	intergenic_variant	MODIFIER	-	-	-	-
sv_30259	18	36001338	36001632	294	DEL	AAAATTTCTTTTTTTTTTTTTTTTTTTTTTTGTCTTTTGGTTGTTGTTGCTATTTCTTGGGCCGCTCCTGCGGCATATGGAGATTCCCAGGCTAGGGGTTGAATCGGAGCTTTAGCCACCAGCCCACGCCAGAGCCACAGCAATGCGGGATCCGAGCCGCGTCTGCAACCTACACCACAGCTCACGGCAACGCCGGATCGTTAACCCACTGAGCAAGGGCAGGGACCGAACCTGCAACCTCATGGTTCCTAGTCAGATTCGTTAACCACTGCGCCACGACAGGAACTCCGGTACC	A	-	intergenic_variant	MODIFIER	-	-	-	-
sv_30270	18	36438405	36438484	79	DEL	TTGGAATTTATTGTTTGTACTTGTTTTAAGCTATGTTTTGTCCTCTGAATTAGCTCTTTTACCTCTGAGATGTTTTCCTG	T	-	intergenic_variant	MODIFIER	-	-	-	-
sv_30363	18	42372689	42372823	134	DUP:TANDEM	CTGGTAGTTATTTGGTTATAGCTTTTGTCTACTTTTGTTTCCGGTGAGGATGCGGCATTTGCCACTTGTTTTCCTGCAGTTTCCTCTTCTTGGAGAGCTCTTTTGCCCCTTCCTTTTTGATGACTCATCTTTGAA	CTGGTAGTTATTTGGTTATAGCTTTTGTCTACTTTTGTTTCCGGTGAGGATGCGGCATTTGCCACTTGTTTTCCTGCAGTTTCCTCTTCTTGGAGAGCTCTTTTGCCCCTTCCTTTTTGATGACTCATCTTTGAAGAGCGGAGTTCTTCCCAGACCAGCTCTTTGCTCTTTGGTAGTTATTTGGTTATAGCTTTTGTCTACTTTTGTTTCCGGTGAGGATGCGGCATTTGCCACTTGTTTTCCTGCAGTTTCCTCTTCTTGGAGAGCTCTTTTGCCCCTTCCTTTTTGATGACTCATCTTTGAA	-	intergenic_variant	MODIFIER	-	-	-	-
sv_30639	X	1754452	1754504	52	DEL	AAACCCTGAAAAGAAACTGATGAAGAAATTAAGCTTTAGGACTGCGTAAGAAT	A	-	intergenic_variant	MODIFIER	-	-	-	-
sv_30656	X	3418388	3418725	337	DEL	TAAAAGAATTCTCCTCTGGGACTTGTGGCTTCCTGATGGGAGGGGGAGGGAGTGGGAGGGATCGGGAGCTTGGGCTTATCAGACACAACTTAGAATAGATTTACAAGGAGATCCTGCTGAATAGCATGAGAACTATGTCTAGATACTCATGTCGCAACAGAAGAAAGGGTGGGGGAAAAAGTGTAATTGTAACGTATACATGTAAGGATAACCTGACCCCCTTGCTGTACAGTGGGAAAATAAAAAAAAATATTAAAAAAAAAGAAGACGAAGATGAAGAAAGGGGAAAGGGACACTGGGGAGGAAAATAAAAAAAGCAAAAGCAAAAAAAAA	T	-	intergenic_variant	MODIFIER	-	-	-	-
sv_30674	X	4496933	4497221	288	DEL	AAATACAATAATAATAATAATTTTTTTTTTTTTTTTGTCTTTTTGCTATTTCTTTGGGCCGCTCCCGCGGCATATGGAGGTTCCCAGGCTAGGGGTCTAATCGGAGCTGTAGCCACTGGCCTACGCCAGAGCCACAGCAACGCAGTATCCGAGCCACGTCTGCAACCTACACCACAGCTCACGGCAATGCCGGATCGTTAACCCACTGAGCAAGGGCAGGGACCGAACCCGCAACCTCATGGTTCCTAGTCGGATTCGTTAACCACTGCGCCACGACGGGAACTCCTAT	A	-	intergenic_variant	MODIFIER	-	-	-	-
sv_30822	X	18491952	18491952	70	INS	A	AGATACACACATACACACAGACACACAGAGACACAGACACACAGACACACATAGACATACACAGACACACT	-	intergenic_variant	MODIFIER	-	-	-	-
sv_30895	X	26185579	26185869	290	DEL	TTTATTTTTTTTTTATTTTGTTGTTGTTGTTGTTGTTGCTATTTCTTGGGCCGCTCCCGCGGCATATGGAGGTTCCCAGGCTAGGGGTCGAATCGGAGCTGTAGCCACCGGCCTGCGCCAGAGCCACAGCAACGCGGGATCCGAGCCGCGTCTGCAACCTACACCACAGCTCACAGCAACGCCGGATCGTTAACCCACTGAGCAAGGCCAGGGATCGAACCCGCGACCTCATGGTTCCTAGTCGGATTCGTTAACCACTGCGCCACGACGGGAACTCCACACAGTTGTTTA	T	-	intergenic_variant	MODIFIER	-	-	-	-
sv_30897	X	26203716	26204034	318	DEL	CCGTCGTGGCGCAGTGGTTAACGAATCCGACTAGGAACCATGAGGTTGGCGGGTTCGGTCCCTGCCCTTGCTCAGTGGGTTAAAGATCCGGCGTTGCCGTGAGCTGTGGTGTAGGTTGCAGACGCGGCTCGGATCCCGCGTTGCTGTGGCTCTGGCGTAGGCCGGTGGCTACAGCTCCGATTCGACCCCTAGCCTGGGAACCTCCATATGCCGCGGGAGCGGCCCAAGAAATAGCAACAATAACAACAACAACAACAACAACAAAAAAGAGACAAAAGGCGAAAAAAAAAAAAAAAGAATATGTAGAAATAGGAGTTCT	C	-	intergenic_variant	MODIFIER	-	-	-	-
sv_30954	X	34440702	34441145	443	DEL	CTGTTACTGTTATTATCTCAAAGGGGTAAGATCAGTCAGTTATGCAAATACCAAAAGAAGCTGGAGGCAGGAACCAGTAAAGTATCTTTGCTTGCTCTGTGCTGATGAGGAGTATCATACAAAGAGAAGGATGCGTGTTCCCTCCTGCCTTCTAATATTGGTAGAGCCTAACAAGAGAACAGCTGGAAAATGAAAACTGTAATTTTGCAGTCTCAGCCCCAGCATCACCGAGTGGAACAGAAAAGAAGAGTGTACTTGGAGCTGAGAGATTAATAACTGGCATGCTTGTTCAGTATCAAGTTTTCCTGGGATACATCATACCATTCCGATCTGTATATTCAAAGCCTTTTTAATTTCAGTGATGTTCTCTTGATTTACATCTGTGAACTTTTTTATGTT…	C	-	intergenic_variant	MODIFIER	-	-	-	-
sv_31082	X	46480561	46480561	110	INS	C	CCATCTTGACAATGGCATCTTGTCCATTAGAACTGACTACCTAGATTCTGAGTTGTCCTGGTTCTTGTCCTTTCTGAGATTCAGTTGCTGTTTTTGTTTTTGTTTTTTCAT	-	intergenic_variant	MODIFIER	-	-	-	-
sv_31106	X	47327039	47327331	292	DEL	TCCCCCATTTTTATTTTTATTTTTATTTTTTTATTTTTTTTTGTCTTTTTGCTACTTCTTTGGGCCGCTCCCGCGGCATATGGAGGTTCCCAGGCTAGGGGTCGAATTGGAGCTGTAGCCGCCGGCCTACACCAGAGCCACAGCAATGCGGGATCCGAGGCGTGTCTGCAACCTACACCACAGCTCACGGCAAGGCAGGATCATTAACCCACTGAGCAAGGGCAGGGACCAAACCCGCAACCTCATGGTTCCTAGTCGGATTCGTTAACCACTGCGCCACGACGGGAACTCCC	T	-	intergenic_variant	MODIFIER	-	-	-	-
sv_31124	X	48376099	48376153	54	DEL	ATAGGGTTAGGGTTAGGGTTAGGGTTAGGGTTAGGGTTAGGGTTAGGGTTAGGGT	A	-	intergenic_variant	MODIFIER	-	-	-	-
sv_31142	X	49128393	49128393	93	INS	C	CAGCAATGTCAGAAGAGAGCCATATCTGTGACTTATACCACAACTCATGGCAAGGCTGGTTCCTTTGCCCGCTGAGTGTCAGTTTCTGACACTG	-	intergenic_variant	MODIFIER	-	-	-	-
sv_31163	X	49931813	49931876	63	DEL	CTCATTTATTTCTACAGTGCCAGTTGTAATTTCACCACTTTCATTTCTGGTTTTATGTGAGCTT	C	-	intergenic_variant	MODIFIER	-	-	-	-
sv_31288	X	57017004	57017317	313	DEL	CAAGAAAAGGGGGAAGAGGGAGTTCCCGTCGTGGCGCAGTGGTTAACGAATCCGACTAGGAACCATGAGGTTGCGGGTTCGGTCCCTGCCCTGGCTCAGTGGGTTAACGATCCGGCGTTGCCATGAGCTGTGGTGTAGGTTGCAGACGCGGCTCGGATCCCATGTTGCTGTGGCTCTGGCGTAGGCCGGTGGCTACAGCTCCGATTCAACCCCTAGCCTGGGAACCTCCATATGCCGCGGGAGCGGCCCAAGAAATAGCAACAACAACAACAACAACAAAAAACAACAACAAAAAAGACAAAAAAAAAAAAAGA	C	-	intergenic_variant	MODIFIER	-	-	-	-
sv_31649	X	71904327	71904621	294	DEL	ACCGTTACAGGAGTTCCCGTCGTGGCGCAGTGGTTAACGAATCCGACTAGGAACCATGAGGTTGCGGGTTCGGTCCCTGCCCTTGCTCAGTGGGTTAAGGATCCGGCGTTGCCATGAGCTGTGGTGTAGGTTGCAGATGCGGCTCGGATCCCGCATTGCTGTGGCTCTGGCGTAGGCCGGTGGCTACAGCTCCAATTCAACCCCTCGCCTGGGAACCTCCATATGCCGTGGGAGCGGCCCAAGAAATAGCAACAACAACAGACAAAAAGACAAAAAAAAAAAAAAAAAAAAAAAC	A	-	intergenic_variant	MODIFIER	-	-	-	-
sv_31863	X	81144864	81145170	306	DEL	TGATCATGTGTTTTTTTTTTTTTTTTTTTTTTTTTTTTTTTTTTTTTTTTTTTGTCTTTTTTTGCTATTTCTTTGGGCCGCTCCCGCCCGGCATATGGAGGTTCCCAGGCTAAGGGTCCAATCGGAGCTGTAGCCACCGGCCTATGCCAGAGCCACAGCAACTCGGGATCCGAGCCGCGTCTGCAACCTACACCACAGCTCACGGCAACGCCGGATCGTTAACCCACTGAGCAAGGGCAGGGACCGAACCCGCAACCTCATGGTTCCTAGTCGGATTTGTTAACCACTGCGCCACGAGGGGAACTCC	T	-	intergenic_variant	MODIFIER	-	-	-	-
sv_31873	X	81705113	81705199	86	DEL	AATATCATTTATAAGAAAGATAAAATTTATAAGAAAGATAAAATTCATTTATATCATTTATAAGAAAGATAAAATTTTATCTTTCTT	A	-	intergenic_variant	MODIFIER	-	-	-	-
sv_31920	X	84450758	84450850	92	DEL	CACCTATGCCACAGCCACAGTAACATCAGATTCAAGCTGCATCTGTGACCTATGCCACAGCCACAGTAACATCAGATTCAAGCTGCATCTGTG	C	-	intergenic_variant	MODIFIER	-	-	-	-
sv_32073	X	101381784	101381784	68	INS	A	AATGGCACTGTACTCAAATTTACTCTATTATAAAGAAACTCCCCCTGAATTAAAGTTTCATGATGTTGG	-	intergenic_variant	MODIFIER	-	-	-	-
sv_32214	X	114637454	114638276	822	DEL	GCTGGCGGCTACAGCTCTGATTCGACCCCTAGCCTGGGAACCTCCATTTACCTTGGGATCGGCCCTAGAAAAGGCAAAAAGACAAAAAGACCAAAAAAAATTTTTTTCATTATAGTTGATTTACAATGCTCTGTCGATTTCTGCTATACAGCAAAGTGACCCAGTTATATATACATTCTTTTTCTCATATTATCTTCTATTGTGTTCTGTCACACGTGATTGGACATAGTTCATTGTAAAAGCACAGAAGTTTTAATTTTGATGAAGTCCCATTTATGTATTTGTTTTTTGGTCATGTGGGAAAATAAAACTATTGCCTAATCCAAGATCATGAATATTTATACCTGTGTTTTCTTCTAATAGATCTATAGTTTTAGCTTACGTTTAAGTCTTTAATCC…	G	-	intergenic_variant	MODIFIER	-	-	-	-
sv_32278	X	121299610	121299882	272	DEL	ATCTTTGTAATTTTTTTTTTTTTGTCTTTTTGCCATTTCTTGGGCCGCTCCAGTGGCATATGGAGGTTCCCAGGCTAGGGGTCCAATCGGAGCTGTAGCCGCCGGCCTACGCCAGAGCCACAGTAACGCAAAATCCGAGCCGCGTCTGCAACCTACACCACAGCTCATGGCAACACTGGATCCTTAACCCACTGAGCAAGGGCAGGGATCAAACCCACAACCTCATGGTTCCTAGTCGGATTCATTAACCACTGCGCCAAGACGGGAACTCCC	A	-	intergenic_variant	MODIFIER	-	-	-	-
sv_32296	X	123330602	123330657	55	DEL	TTGAGAGAAGTAGCAAACAGGGCCATAAGGGTGAGGGTGACAGTGATGCTGTAACA	T	-	intergenic_variant	MODIFIER	-	-	-	-
