# Supplementary material for: Detection of genomic structure variants associated with wrinkled skin in Xiang pig by next generation sequencing
Source: Aging (Albany NY). 2021 Nov 27;13(22):24710–39. doi: 10.18632/aging.203711 (PMC8660620; doi:10.18632/aging.203711)
Supplement: Supplementary Table 8 [file aging-13-203711-s005.xlsx]

## Sheet: Sheet1
Supplementary Table 8. KEGG Pathway analysis and Gene ontology (GO) annotation in WXP_specific SVs.
Term	ID	gene number with SV in WXP	gene number with SV in XP	gene number with SV in EUP	P value of genes with SV in WXP	P value of genes with SV in XP	P value of genes with SV in EUP	genes ID with SV in WXP	genes ID with SV in XP	genes ID with SV in EUP	Background gene number
RNA transport	ssc03013	8	4	5	0.00516284	0.797499	0.817973	ENSSSCG00000013405|ENSSSCG00000030386|ENSSSCG00000029808|ENSSSCG00000005711|ENSSSCG00000014794|ENSSSCG00000006063|ENSSSCG00000017430|ENSSSCG00000004489	ENSSSCG00000026976|ENSSSCG00000005366|ENSSSCG00000013405|ENSSSCG00000003849	ENSSSCG00000016845|ENSSSCG00000005366|ENSSSCG00000009746|ENSSSCG00000010679|ENSSSCG00000006251	129
Notch signaling pathway	ssc04330	3	-	3	0.0559642	-	0.40312	ENSSSCG00000010739|ENSSSCG00000022155|ENSSSCG00000010860	-	ENSSSCG00000010739|ENSSSCG00000022155|ENSSSCG00000006709	42
Wnt signaling pathway	ssc04310	5	10	12	0.0810575	0.0305328	0.0268262	ENSSSCG00000016140|ENSSSCG00000007477|ENSSSCG00000010739|ENSSSCG00000003811|ENSSSCG00000017317	ENSSSCG00000016628|ENSSSCG00000007058|ENSSSCG00000007056|ENSSSCG00000011889|ENSSSCG00000004524|ENSSSCG00000009228|ENSSSCG00000016780|ENSSSCG00000009148|ENSSSCG00000006034|ENSSSCG00000009679	ENSSSCG00000023004|ENSSSCG00000007058|ENSSSCG00000003811|ENSSSCG00000015455|ENSSSCG00000012102|ENSSSCG00000006383|ENSSSCG00000009228|ENSSSCG00000016780|ENSSSCG00000006746|ENSSSCG00000009593|ENSSSCG00000010739|ENSSSCG00000009123	114
ABC transporters	ssc02010	3	2	4	0.0901481	0.653283	0.317853	ENSSSCG00000005423|ENSSSCG00000011782|ENSSSCG00000027986	ENSSSCG00000012424|ENSSSCG00000022813	ENSSSCG00000028620|ENSSSCG00000017561|ENSSSCG00000022813|ENSSSCG00000016626	52
Longevity regulating pathway - multiple species	ssc04213	3	4	3	0.0939553	0.203071	0.547606	ENSSSCG00000027952|ENSSSCG00000004387|ENSSSCG00000017139	ENSSSCG00000008578|ENSSSCG00000003909|ENSSSCG00000006703|ENSSSCG00000017101	ENSSSCG00000016726|ENSSSCG00000003395|ENSSSCG00000017101	53
Nicotinate and nicotinamide metabolism	ssc00760	2	5	2	0.101394	0.00786589	0.420423	ENSSSCG00000016877|ENSSSCG00000016093	ENSSSCG00000005272|ENSSSCG00000008742|ENSSSCG00000015435|ENSSSCG00000016877|ENSSSCG00000015054	ENSSSCG00000004291|ENSSSCG00000015435	26
Pentose phosphate pathway	ssc00030	2	1	-	0.101394	0.67589	-	ENSSSCG00000002873|ENSSSCG00000011432	ENSSSCG00000008207	-	26
Mucin type O-glycan biosynthesis	ssc00512	2	3	3	0.101394	0.113208	0.181277	ENSSSCG00000002306|ENSSSCG00000016431	ENSSSCG00000017072|ENSSSCG00000016431|ENSSSCG00000008524	ENSSSCG00000005379|ENSSSCG00000016431|ENSSSCG00000010185	26
Phagosome	ssc04145	5	6	10	0.110342	0.453845	0.154901	ENSSSCG00000011916|ENSSSCG00000024927|ENSSSCG00000001379|ENSSSCG00000025629|ENSSSCG00000016147	ENSSSCG00000006350|ENSSSCG00000015559|ENSSSCG00000014369|ENSSSCG00000017401|ENSSSCG00000001459|ENSSSCG00000007754	ENSSSCG00000003749|ENSSSCG00000000648|ENSSSCG00000011233|ENSSSCG00000004012|ENSSSCG00000001398|ENSSSCG00000015885|ENSSSCG00000000194|ENSSSCG00000006054|ENSSSCG00000011101|ENSSSCG00000007754	126
Tyrosine metabolism	ssc00350	2	2	2	0.113843	0.348137	0.455552	ENSSSCG00000018044|ENSSSCG00000016093	ENSSSCG00000009182|ENSSSCG00000023215	ENSSSCG00000013976|ENSSSCG00000009185	28
Autophagy - other	ssc04136	2	2	1	0.120208	0.363085	0.791479	ENSSSCG00000003816|ENSSSCG00000017139	ENSSSCG00000018045|ENSSSCG00000016300	ENSSSCG00000003749	29
mTOR signaling pathway	ssc04150	5	6	7	0.129491	0.503868	0.573252	ENSSSCG00000016140|ENSSSCG00000011916|ENSSSCG00000017139|ENSSSCG00000021443|ENSSSCG00000017317	ENSSSCG00000016628|ENSSSCG00000001053|ENSSSCG00000003909|ENSSSCG00000011889|ENSSSCG00000018045|ENSSSCG00000009679	ENSSSCG00000023004|ENSSSCG00000003395|ENSSSCG00000016835|ENSSSCG00000009397|ENSSSCG00000001053|ENSSSCG00000024045|ENSSSCG00000006054	133
lamin filament	GO:0005638	3	-	-	0.000372566	-	-	ENSSSCG00000022864|ENSSSCG00000014248|ENSSSCG00000006496	-	-	5
nuclear lamina	GO:0005652	3	-	-	0.000372566	-	-	ENSSSCG00000022864|ENSSSCG00000014248|ENSSSCG00000006496	-	-	5
nuclear periphery	GO:0034399	4	-	-	0.00194212	-	-	ENSSSCG00000022864|ENSSSCG00000014248|ENSSSCG00000006496|ENSSSCG00000013726	-	-	24
nuclear inner membrane	GO:0005637	2	-	-	0.0216294	-	-	ENSSSCG00000014248|ENSSSCG00000010860	-	-	10
nuclear membrane	GO:0031965	5	1	3	0.00205904	0.833922	0.40312	ENSSSCG00000014248|ENSSSCG00000010860|ENSSSCG00000008600|ENSSSCG00000006496|ENSSSCG00000013726	ENSSSCG00000017836	ENSSSCG00000014967|ENSSSCG00000010683|ENSSSCG00000008517	42
nuclear envelope	GO:0005635	6	1	4	0.00349036	0.948549	0.523639	ENSSSCG00000013726|ENSSSCG00000006496|ENSSSCG00000014248|ENSSSCG00000008600|ENSSSCG00000010860|ENSSSCG00000001379	ENSSSCG00000017836	ENSSSCG00000002722|ENSSSCG00000014967|ENSSSCG00000010683|ENSSSCG00000008517	70
positive regulation of mRNA processing	GO:0050685	2	1	1	0.00733469	0.221351	0.268964	ENSSSCG00000004625|ENSSSCG00000000385	ENSSSCG00000004625	ENSSSCG00000013107	5
positive regulation of DNA-templated transcription, elongation	GO:0032786	2	1	-	0.0122567	0.283671	-	ENSSSCG00000004625|ENSSSCG00000004699	ENSSSCG00000004625	-	7
translation factor activity, RNA binding	GO:0008135	3	-	1	0.0180235	-	0.756053	ENSSSCG00000004489|ENSSSCG00000022864|ENSSSCG00000017430	-	ENSSSCG00000010679	26
regulation of DNA-templated transcription, elongation	GO:0032784	2	2		0.0182548	0.0717354	-	ENSSSCG00000004625|ENSSSCG00000004699	ENSSSCG00000004625|ENSSSCG00000011166	-	9
translation regulator activity, nucleic acid binding	GO:0090079	3	-	1	0.0254392	-	0.802107	ENSSSCG00000004489|ENSSSCG00000022864|ENSSSCG00000017430	-	ENSSSCG00000010679	30
positive regulation of mRNA metabolic process	GO:1903313	2	1	1	0.0290764	0.418543	0.492855	ENSSSCG00000004625|ENSSSCG00000000385	ENSSSCG00000004625	ENSSSCG00000013107	12
translation regulator activity	GO:0045182	3	-	1	0.0319201	-	0.830852	ENSSSCG00000004489|ENSSSCG00000022864|ENSSSCG00000017430	-	ENSSSCG00000010679	33
transcription elongation from RNA polymerase II promoter	GO:0006368	2	2	-	0.02524	0.0964665	-	ENSSSCG00000004625|ENSSSCG00000004699	ENSSSCG00000004625|ENSSSCG00000011166	-	11
ribonucleoprotein complex export from nucleus	GO:0071426	2	1	1	0.0464834	0.507937	0.588517	ENSSSCG00000005711|ENSSSCG00000022864	ENSSSCG00000027139	ENSSSCG00000002722	16
ribonucleoprotein complex localization	GO:0071166	2	1	1	0.0464834	0.507937	0.588517	ENSSSCG00000005711|ENSSSCG00000022864	ENSSSCG00000027139	ENSSSCG00000002722	16
DNA-templated transcription, elongation	GO:0006354	2	2	1	0.0373866	0.137138	0.54318	ENSSSCG00000004625|ENSSSCG00000004699	ENSSSCG00000004625|ENSSSCG00000011166	ENSSSCG00000024019	14
transcription elongation factor complex	GO:0008023	2	1	1	0.0418413	0.486965	0.56644	ENSSSCG00000004625|ENSSSCG00000004699	ENSSSCG00000004625	ENSSSCG00000006168	15
translation initiation factor activity	GO:0003743	2	-	1	0.0513041	-	0.609471	ENSSSCG00000022864|ENSSSCG00000017430	-	-	17
non-canonical Wnt signaling pathway	GO:0035567	2	-	1	0.0216294	-	0.436994	ENSSSCG00000016140|ENSSSCG00000001660	-	ENSSSCG00000009593	10
canonical Wnt signaling pathway	GO:0060070	3	1	2	0.0444441	0.803692	0.610834	ENSSSCG00000016140|ENSSSCG00000001660|ENSSSCG00000022155	ENSSSCG00000009148	ENSSSCG00000009593|ENSSSCG00000022155	38
negative regulation of apoptotic process	GO:0043066	8	9	7	0.0199748	0.287039	0.78301	ENSSSCG00000017705|ENSSSCG00000006496|ENSSSCG00000001701|ENSSSCG00000010860|ENSSSCG00000004699|ENSSSCG00000009240|ENSSSCG00000008300|ENSSSCG00000008691	ENSSSCG00000027997|ENSSSCG00000009203|ENSSSCG00000014149|ENSSSCG00000015340|ENSSSCG00000011567|ENSSSCG00000022168|ENSSSCG00000009148|ENSSSCG00000012371|ENSSSCG00000011166	ENSSSCG00000012332|ENSSSCG00000027778|ENSSSCG00000010683|ENSSSCG00000009664|ENSSSCG00000010631|ENSSSCG00000022168|ENSSSCG00000015733	166
negative regulation of programmed cell death	GO:0043069	8	9	7	0.0212273	0.298203	0.792778	ENSSSCG00000017705|ENSSSCG00000006496|ENSSSCG00000001701|ENSSSCG00000010860|ENSSSCG00000004699|ENSSSCG00000009240|ENSSSCG00000008300|ENSSSCG00000008691	ENSSSCG00000027997|ENSSSCG00000009203|ENSSSCG00000014149|ENSSSCG00000015340|ENSSSCG00000011567|ENSSSCG00000022168|ENSSSCG00000009148|ENSSSCG00000012371|ENSSSCG00000011166	ENSSSCG00000012332|ENSSSCG00000027778|ENSSSCG00000010683|ENSSSCG00000009664|ENSSSCG00000010631|ENSSSCG00000022168|ENSSSCG00000015733	168
negative regulation of cell death	GO:0060548	8	10	7	0.030751	0.254802	0.848313	ENSSSCG00000017705|ENSSSCG00000006496|ENSSSCG00000001701|ENSSSCG00000010860|ENSSSCG00000004699|ENSSSCG00000009240|ENSSSCG00000008300|ENSSSCG00000008691	ENSSSCG00000027997|ENSSSCG00000009203|ENSSSCG00000014149|ENSSSCG00000015340|ENSSSCG00000011567|ENSSSCG00000022168|ENSSSCG00000004524|ENSSSCG00000009148|ENSSSCG00000012371|ENSSSCG00000011166	ENSSSCG00000012332|ENSSSCG00000027778|ENSSSCG00000010683|ENSSSCG00000009664|ENSSSCG00000010631|ENSSSCG00000022168|ENSSSCG00000015733	181
positive regulation of cell activation	GO:0050867	4	1	4	0.0318057	0.91496	0.388082	ENSSSCG00000007477|ENSSSCG00000008691|ENSSSCG00000017705|ENSSSCG00000006731	ENSSSCG00000014149	ENSSSCG00000022820|ENSSSCG00000010631|ENSSSCG00000027275|ENSSSCG00000009589	58
regulation of apoptotic process	GO:0042981	10	9	11	0.049797	0.821779	0.863994	ENSSSCG00000017705|ENSSSCG00000006496|ENSSSCG00000001701|ENSSSCG00000012318|ENSSSCG00000010860|ENSSSCG00000004699|ENSSSCG00000009240|ENSSSCG00000008300|ENSSSCG00000024413|ENSSSCG00000008691	ENSSSCG00000027997|ENSSSCG00000009203|ENSSSCG00000014149|ENSSSCG00000015340|ENSSSCG00000011567|ENSSSCG00000022168|ENSSSCG00000009148|ENSSSCG00000012371|ENSSSCG00000011166	ENSSSCG00000012318|ENSSSCG00000027778|ENSSSCG00000016835|ENSSSCG00000012332|ENSSSCG00000003790|ENSSSCG00000016714|ENSSSCG00000010683|ENSSSCG00000009664|ENSSSCG00000022168|ENSSSCG00000010631|ENSSSCG00000015733	274
regulation of programmed cell death	GO:0043067	10	9	11	0.0517527	0.827864	0.869641	ENSSSCG00000017705|ENSSSCG00000006496|ENSSSCG00000001701|ENSSSCG00000012318|ENSSSCG00000010860|ENSSSCG00000004699|ENSSSCG00000009240|ENSSSCG00000008300|ENSSSCG00000024413|ENSSSCG00000008691	ENSSSCG00000027997|ENSSSCG00000009203|ENSSSCG00000014149|ENSSSCG00000015340|ENSSSCG00000011567|ENSSSCG00000022168|ENSSSCG00000009148|ENSSSCG00000012371|ENSSSCG00000011166	ENSSSCG00000012318|ENSSSCG00000027778|ENSSSCG00000016835|ENSSSCG00000012332|ENSSSCG00000003790|ENSSSCG00000016714|ENSSSCG00000010683|ENSSSCG00000009664|ENSSSCG00000022168|ENSSSCG00000010631|ENSSSCG00000015733	276
chromosome, centromeric region	GO:0000775	3	1	3	0.0254392	0.725763	0.23473	ENSSSCG00000024413|ENSSSCG00000010860|ENSSSCG00000016313	ENSSSCG00000017836	ENSSSCG00000016711|ENSSSCG00000014307|ENSSSCG00000016313	30
intermediate filament	GO:0005882	3	1	1	0.0215559	0.701866	0.780281	ENSSSCG00000022864|ENSSSCG00000014248|ENSSSCG00000006496	ENSSSCG00000020838	ENSSSCG00000017448	28
supramolecular complex	GO:0099080	8	7	7	0.0267957	0.623565	0.828545	ENSSSCG00000006496|ENSSSCG00000014248|ENSSSCG00000008600|ENSSSCG00000004289|ENSSSCG00000016313|ENSSSCG00000010860|ENSSSCG00000022864|ENSSSCG00000001379	ENSSSCG00000007575|ENSSSCG00000008433|ENSSSCG00000017836|ENSSSCG00000017308|ENSSSCG00000004289|ENSSSCG00000020838|ENSSSCG00000004980	ENSSSCG00000008517|ENSSSCG00000000496|ENSSSCG00000016313|ENSSSCG00000011090|ENSSSCG00000017448|ENSSSCG00000000194|ENSSSCG00000026710	176
intermediate filament cytoskeleton	GO:0045111	3	1	1	0.0275123	0.736984	0.812193	ENSSSCG00000022864|ENSSSCG00000014248|ENSSSCG00000006496	ENSSSCG00000020838	ENSSSCG00000017448	31
polymeric cytoskeletal fiber	GO:0099513	5	6	4	0.0384416	0.204856	0.718657	ENSSSCG00000022864|ENSSSCG00000014248|ENSSSCG00000004289|ENSSSCG00000001379|ENSSSCG00000006496	ENSSSCG00000007575|ENSSSCG00000008433|ENSSSCG00000017836|ENSSSCG00000017308|ENSSSCG00000020838|ENSSSCG00000004289	ENSSSCG00000000194|ENSSSCG00000000496|ENSSSCG00000017448|ENSSSCG00000008517	91
supramolecular fiber	GO:0099512	6	7	5	0.0515595	0.34044	0.832467	ENSSSCG00000006496|ENSSSCG00000014248|ENSSSCG00000010860|ENSSSCG00000004289|ENSSSCG00000022864|ENSSSCG00000001379	ENSSSCG00000007575|ENSSSCG00000008433|ENSSSCG00000017836|ENSSSCG00000017308|ENSSSCG00000004289|ENSSSCG00000020838|ENSSSCG00000004980	ENSSSCG00000000194|ENSSSCG00000011090|ENSSSCG00000000496|ENSSSCG00000017448|ENSSSCG00000008517	132
supramolecular polymer	GO:0099081	6	7	5	0.0515595	0.34044	0.832467	ENSSSCG00000006496|ENSSSCG00000014248|ENSSSCG00000010860|ENSSSCG00000004289|ENSSSCG00000022864|ENSSSCG00000001379	ENSSSCG00000007575|ENSSSCG00000008433|ENSSSCG00000017836|ENSSSCG00000017308|ENSSSCG00000004289|ENSSSCG00000020838|ENSSSCG00000004980	ENSSSCG00000000194|ENSSSCG00000011090|ENSSSCG00000000496|ENSSSCG00000017448|ENSSSCG00000008517	132
chemokine receptor binding	GO:0042379	2	-	-	0.0418413	-	-	ENSSSCG00000023557|ENSSSCG00000017705	-	-	15
CCR chemokine receptor binding	GO:0048020	2	-	-	0.00733469	-	-	ENSSSCG00000023557|ENSSSCG00000017705	-	-	5
interleukin-4 production	GO:0032633	2	1	1	0.0151269	0.312938	0.374988	ENSSSCG00000022155|ENSSSCG00000006731	ENSSSCG00000009148	ENSSSCG00000022155	8
positive regulation of lymphocyte activation	GO:0051251	4	1	3	0.0203027	0.881148	0.510124	ENSSSCG00000007477|ENSSSCG00000008691|ENSSSCG00000017705|ENSSSCG00000006731	ENSSSCG00000014149	ENSSSCG00000010631|ENSSSCG00000027275|ENSSSCG00000009589	50
cytokine secretion	GO:0050663	3	-	3	0.0275123	-	0.248516	ENSSSCG00000022155|ENSSSCG00000008359|ENSSSCG00000006731	-	ENSSSCG00000010631|ENSSSCG00000006403|ENSSSCG00000022155	31
positive regulation of leukocyte activation	GO:0002696	4	1	4	0.0286378	0.907536	0.364683	ENSSSCG00000007477|ENSSSCG00000008691|ENSSSCG00000017705|ENSSSCG00000006731	ENSSSCG00000014149	ENSSSCG00000022820|ENSSSCG00000010631|ENSSSCG00000027275|ENSSSCG00000009589	56
positive regulation of leukocyte proliferation	GO:0070665	3	1	3	0.0319201	0.75807	0.276416	ENSSSCG00000007477|ENSSSCG00000017705|ENSSSCG00000006731	ENSSSCG00000014149	ENSSSCG00000010631|ENSSSCG00000027275|ENSSSCG00000009589	33
positive regulation of lymphocyte proliferation	GO:0050671	3	1	-	0.0319201	0.75807	-	ENSSSCG00000007477|ENSSSCG00000017705|ENSSSCG00000006731	ENSSSCG00000014149	-	33
positive regulation of mononuclear cell proliferation	GO:0032946	3	1	3	0.0319201	0.75807	0.276416	ENSSSCG00000007477|ENSSSCG00000017705|ENSSSCG00000006731	ENSSSCG00000014149	ENSSSCG00000010631|ENSSSCG00000027275|ENSSSCG00000009589	33
cellular response to interferon-gamma	GO:0071346	2	-	-	0.0331285	-	-	ENSSSCG00000017705|ENSSSCG00000001701	-	-	13
myeloid leukocyte activation	GO:0002274	3	1	3	0.034254	0.767971	0.290484	ENSSSCG00000022155|ENSSSCG00000008691|ENSSSCG00000017705	ENSSSCG00000009203	ENSSSCG00000022820|ENSSSCG00000022155|ENSSSCG00000009589	34
cytokine production	GO:0001816	6	2	5	0.0380404	0.964808	0.780251	ENSSSCG00000022155|ENSSSCG00000016140|ENSSSCG00000006731|ENSSSCG00000008600|ENSSSCG00000008359|ENSSSCG00000007477	ENSSSCG00000009148|ENSSSCG00000004524	ENSSSCG00000010631|ENSSSCG00000006403|ENSSSCG00000006175|ENSSSCG00000027275|ENSSSCG00000022155	122
cellular response to interleukin-1	GO:0071347	2	1	-	0.0418413	0.486965	-	ENSSSCG00000008691|ENSSSCG00000017705	ENSSSCG00000008395	-	15
regulation of immune system process	GO:0002682	9	5	9	0.045974	0.968501	0.872787	ENSSSCG00000017705|ENSSSCG00000001701|ENSSSCG00000016140|ENSSSCG00000008600|ENSSSCG00000009527|ENSSSCG00000004625|ENSSSCG00000006731|ENSSSCG00000007477|ENSSSCG00000008691	ENSSSCG00000009203|ENSSSCG00000002715|ENSSSCG00000014149|ENSSSCG00000009148|ENSSSCG00000004625	ENSSSCG00000017923|ENSSSCG00000022820|ENSSSCG00000010631|ENSSSCG00000027275|ENSSSCG00000009527|ENSSSCG00000006175|ENSSSCG00000025537|ENSSSCG00000009664|ENSSSCG00000009589	233
response to interferon-gamma	GO:0034341	2	2	1	0.0513041	0.180747	0.609471	ENSSSCG00000017705|ENSSSCG00000001701	ENSSSCG00000009203|ENSSSCG00000017543	ENSSSCG00000017543	17
positive regulation of protein catabolic process	GO:0045732	4	1	2	0.0118042	0.833922	0.662754	ENSSSCG00000026293|ENSSSCG00000017116|ENSSSCG00000001076|ENSSSCG00000014394	ENSSSCG00000007291	ENSSSCG00000002446|ENSSSCG00000009664	42
regulation of proteasomal ubiquitin-dependent protein catabolic process	GO:0032434	3	-		0.0163885	-		ENSSSCG00000001701|ENSSSCG00000001076|ENSSSCG00000014394	-		25
regulation of protein catabolic process	GO:0042176	5	3	2	0.0166328	0.596123	0.896287	ENSSSCG00000001701|ENSSSCG00000026293|ENSSSCG00000017116|ENSSSCG00000001076|ENSSSCG00000014394	ENSSSCG00000009203|ENSSSCG00000004524|ENSSSCG00000007291	ENSSSCG00000002446|ENSSSCG00000009664	72
establishment of protein localization	GO:0045184	12	5	11	0.0173311	0.994998	0.918265	ENSSSCG00000005386|ENSSSCG00000013726|ENSSSCG00000017705|ENSSSCG00000022155|ENSSSCG00000005711|ENSSSCG00000006731|ENSSSCG00000026293|ENSSSCG00000024927|ENSSSCG00000016140|ENSSSCG00000008359|ENSSSCG00000022864|ENSSSCG00000000097	ENSSSCG00000011567|ENSSSCG00000023247|ENSSSCG00000027139|ENSSSCG00000011196|ENSSSCG00000007291	ENSSSCG00000008947|ENSSSCG00000022155|ENSSSCG00000007812|ENSSSCG00000002722|ENSSSCG00000006403|ENSSSCG00000010631|ENSSSCG00000003405|ENSSSCG00000009010|ENSSSCG00000014307|ENSSSCG00000006168|ENSSSCG00000022222	297
regulation of ubiquitin-dependent protein catabolic process	GO:2000058	3	-	1	0.0197459	-	0.768483	ENSSSCG00000001701|ENSSSCG00000001076|ENSSSCG00000014394	-	ENSSSCG00000009664	27
ubiquitin conjugating enzyme binding	GO:0031624	2	-	1	0.02524	-	0.465653	ENSSSCG00000001076|ENSSSCG00000014394	-	ENSSSCG00000008831	11
ubiquitin-like protein conjugating enzyme binding	GO:0044390	2	-	1	0.0290764	-	0.492855	ENSSSCG00000001076|ENSSSCG00000014394	-	ENSSSCG00000008831	12
positive regulation of proteasomal ubiquitin-dependent protein catabolic process	GO:0032436	2	-	-	0.0464834	-	-	ENSSSCG00000001076|ENSSSCG00000014394	-	-	16
regulation of proteasomal protein catabolic process	GO:0061136	3	1	1	0.0472016	0.811729	0.876435	ENSSSCG00000001701|ENSSSCG00000001076|ENSSSCG00000014394	ENSSSCG00000007291	ENSSSCG00000002446	39
protein import	GO:0017038	3	1	2	0.0444441	0.803692	0.610834	ENSSSCG00000005711|ENSSSCG00000013726|ENSSSCG00000000097	ENSSSCG00000011567	ENSSSCG00000003405|ENSSSCG00000006168	38
protein N-terminus binding	GO:0047485	2	1	2	0.0513041	0.528053	0.251479	ENSSSCG00000022155|ENSSSCG00000026293	ENSSSCG00000008433	ENSSSCG00000022155|ENSSSCG00000003405	17
response to other organism	GO:0051707	11	7	11	0.0106531	0.889489	0.750202	ENSSSCG00000022155|ENSSSCG00000017705|ENSSSCG00000001701|ENSSSCG00000016140|ENSSSCG00000006731|ENSSSCG00000008600|ENSSSCG00000009527|ENSSSCG00000009240|ENSSSCG00000008359|ENSSSCG00000008691|ENSSSCG00000002366	ENSSSCG00000009203|ENSSSCG00000002715|ENSSSCG00000014149|ENSSSCG00000023247|ENSSSCG00000004434|ENSSSCG00000017543|ENSSSCG00000001651	ENSSSCG00000022155|ENSSSCG00000010631|ENSSSCG00000009527|ENSSSCG00000006175|ENSSSCG00000025537|ENSSSCG00000015733|ENSSSCG00000009185|ENSSSCG00000004434|ENSSSCG00000017543|ENSSSCG00000009589|ENSSSCG00000009664	243
response to external biotic stimulus	GO:0043207	11	7	11	0.0109485	0.891789	0.754681	ENSSSCG00000022155|ENSSSCG00000017705|ENSSSCG00000001701|ENSSSCG00000016140|ENSSSCG00000006731|ENSSSCG00000008600|ENSSSCG00000009527|ENSSSCG00000009240|ENSSSCG00000008359|ENSSSCG00000008691|ENSSSCG00000002366	ENSSSCG00000009203|ENSSSCG00000002715|ENSSSCG00000014149|ENSSSCG00000023247|ENSSSCG00000004434|ENSSSCG00000017543|ENSSSCG00000001651	ENSSSCG00000022155|ENSSSCG00000010631|ENSSSCG00000009527|ENSSSCG00000006175|ENSSSCG00000025537|ENSSSCG00000015733|ENSSSCG00000009185|ENSSSCG00000004434|ENSSSCG00000017543|ENSSSCG00000009589|ENSSSCG00000009664	244
response to biotic stimulus	GO:0009607	11	7	11	0.0142586	0.912654	0.796454	ENSSSCG00000022155|ENSSSCG00000017705|ENSSSCG00000001701|ENSSSCG00000016140|ENSSSCG00000006731|ENSSSCG00000008600|ENSSSCG00000009527|ENSSSCG00000009240|ENSSSCG00000008359|ENSSSCG00000008691|ENSSSCG00000002366	ENSSSCG00000009203|ENSSSCG00000002715|ENSSSCG00000014149|ENSSSCG00000023247|ENSSSCG00000004434|ENSSSCG00000017543|ENSSSCG00000001651	ENSSSCG00000022155|ENSSSCG00000010631|ENSSSCG00000009527|ENSSSCG00000006175|ENSSSCG00000025537|ENSSSCG00000015733|ENSSSCG00000009185|ENSSSCG00000004434|ENSSSCG00000017543|ENSSSCG00000009589|ENSSSCG00000009664	254
response to bacterium	GO:0009617	6	3	4	0.0176309	0.802875	0.787995	ENSSSCG00000022155|ENSSSCG00000017705|ENSSSCG00000016140|ENSSSCG00000009240|ENSSSCG00000008359|ENSSSCG00000008691	ENSSSCG00000009203|ENSSSCG00000014149|ENSSSCG00000023247	ENSSSCG00000022155|ENSSSCG00000006175|ENSSSCG00000009185|ENSSSCG00000009589	101
multi-organism process	GO:0051704	16	17	21	0.018631	0.715492	0.75858	ENSSSCG00000022155|ENSSSCG00000017705|ENSSSCG00000016431|ENSSSCG00000001701|ENSSSCG00000016140|ENSSSCG00000008359|ENSSSCG00000008600|ENSSSCG00000009527|ENSSSCG00000002366|ENSSSCG00000009240|ENSSSCG00000024413|ENSSSCG00000006731|ENSSSCG00000001750|ENSSSCG00000008691|ENSSSCG00000011106|ENSSSCG00000016592	ENSSSCG00000027997|ENSSSCG00000012022|ENSSSCG00000014149|ENSSSCG00000016431|ENSSSCG00000002715|ENSSSCG00000017836|ENSSSCG00000023247|ENSSSCG00000004524|ENSSSCG00000009203|ENSSSCG00000016166|ENSSSCG00000009194|ENSSSCG00000009148|ENSSSCG00000004434|ENSSSCG00000017051|ENSSSCG00000017543|ENSSSCG00000001651|ENSSSCG00000016192	ENSSSCG00000016166|ENSSSCG00000022155|ENSSSCG00000015197|ENSSSCG00000016431|ENSSSCG00000005236|ENSSSCG00000010631|ENSSSCG00000000496|ENSSSCG00000009527|ENSSSCG00000006175|ENSSSCG00000025537|ENSSSCG00000022820|ENSSSCG00000015733|ENSSSCG00000016626|ENSSSCG00000009664|ENSSSCG00000004434|ENSSSCG00000022230|ENSSSCG00000025188|ENSSSCG00000012583|ENSSSCG00000017543|ENSSSCG00000009589|ENSSSCG00000009185	448
cellular response to molecule of bacterial origin	GO:0071219	3	1	1	0.0319201	0.75807	0.830852	ENSSSCG00000016140|ENSSSCG00000008691|ENSSSCG00000017705	ENSSSCG00000014149	ENSSSCG00000006175	33
cellular response to biotic stimulus	GO:0071216	3	1	2	0.0472016	0.811729	0.624363	ENSSSCG00000016140|ENSSSCG00000008691|ENSSSCG00000017705	ENSSSCG00000014149	ENSSSCG00000009589|ENSSSCG00000006175	39
defense response to other organism	GO:0098542	8	6	9	0.0482598	0.847774	0.737025	ENSSSCG00000022155|ENSSSCG00000017705|ENSSSCG00000001701|ENSSSCG00000008600|ENSSSCG00000009527|ENSSSCG00000009240|ENSSSCG00000008359|ENSSSCG00000008691	ENSSSCG00000009203|ENSSSCG00000002715|ENSSSCG00000023247|ENSSSCG00000004434|ENSSSCG00000017543|ENSSSCG00000001651	ENSSSCG00000022155|ENSSSCG00000010631|ENSSSCG00000009527|ENSSSCG00000006175|ENSSSCG00000025537|ENSSSCG00000009664|ENSSSCG00000004434|ENSSSCG00000017543|ENSSSCG00000009589	199
SNAP receptor activity	GO:0005484	3	-	1	0.00397653	-	0.54318	ENSSSCG00000024927|ENSSSCG00000005386|ENSSSCG00000026293	-	ENSSSCG00000022820	14
SNARE complex	GO:0031201	3	-	1	0.00397653	-	0.54318	ENSSSCG00000024927|ENSSSCG00000005386|ENSSSCG00000026293	-	ENSSSCG00000022820	14
membrane docking	GO:0022406	3	-	-	0.00470425	-	-	ENSSSCG00000024927|ENSSSCG00000005386|ENSSSCG00000026293	-	-	15
organelle localization by membrane tethering	GO:0140056	3	-	-	0.00470425	-	-	ENSSSCG00000024927|ENSSSCG00000005386|ENSSSCG00000026293	-	-	15
vesicle docking	GO:0048278	3	-	-	0.00470425	-	-	ENSSSCG00000024927|ENSSSCG00000005386|ENSSSCG00000026293	-	-	15
endoplasmic reticulum to Golgi vesicle-mediated transport	GO:0006888	3	-	2	0.00734693	-	0.2707	ENSSSCG00000005386|ENSSSCG00000026293|ENSSSCG00000008359	-	ENSSSCG00000010931|ENSSSCG00000008517	18
SNARE binding	GO:0000149	3	-	1	0.00950909	-	0.666153	ENSSSCG00000024927|ENSSSCG00000005386|ENSSSCG00000026293	-	ENSSSCG00000022820	20
Golgi membrane	GO:0000139	5	2	1	0.0183967	0.822564	0.666153	ENSSSCG00000004244|ENSSSCG00000010860|ENSSSCG00000026293|ENSSSCG00000002283|ENSSSCG00000008359	ENSSSCG00000008524|ENSSSCG00000013273	ENSSSCG00000009664	20
organelle localization	GO:0051640	5	3	6	0.0212666	0.639909	0.246665	ENSSSCG00000022864|ENSSSCG00000024927|ENSSSCG00000026293|ENSSSCG00000005386|ENSSSCG00000008359	ENSSSCG00000017836|ENSSSCG00000001062|ENSSSCG00000014239	ENSSSCG00000008517|ENSSSCG00000022820|ENSSSCG00000010931|ENSSSCG00000003405|ENSSSCG00000014224|ENSSSCG00000009589	77
vesicle fusion	GO:0006906	3	-	1	0.0215559	-	0.780281	ENSSSCG00000024927|ENSSSCG00000005386|ENSSSCG00000026293	-	ENSSSCG00000022820	28
organelle membrane fusion	GO:0090174	3	-	1	0.0234537	-	0.791479	ENSSSCG00000024927|ENSSSCG00000005386|ENSSSCG00000026293	-	ENSSSCG00000022820	29
membrane fusion	GO:0061025	3	-	2	0.034254	-	0.553033	ENSSSCG00000024927|ENSSSCG00000005386|ENSSSCG00000026293	-	ENSSSCG00000022820|ENSSSCG00000022230	34
organelle fusion	GO:0048284	3	-	1	0.034254	-	0.839475	ENSSSCG00000024927|ENSSSCG00000005386|ENSSSCG00000026293	-	ENSSSCG00000022820	34
Golgi organization	GO:0007030	2	1	1	0.0290764	0.418543	0.492855	ENSSSCG00000005386|ENSSSCG00000026293	ENSSSCG00000023247	ENSSSCG00000020711	12
Golgi vesicle transport	GO:0048193	3	2	3	0.0500414	0.516317	0.375203	ENSSSCG00000005386|ENSSSCG00000026293|ENSSSCG00000008359	ENSSSCG00000023247|ENSSSCG00000007478	ENSSSCG00000020711|ENSSSCG00000010931|ENSSSCG00000008517	40
endomembrane system	GO:0012505	20	26	30	0.0527545	0.736473	0.87834	ENSSSCG00000005386|ENSSSCG00000001080|ENSSSCG00000016176|ENSSSCG00000006496|ENSSSCG00000013726|ENSSSCG00000016140|ENSSSCG00000014248|ENSSSCG00000008600|ENSSSCG00000026293|ENSSSCG00000001582|ENSSSCG00000002283|ENSSSCG00000024927|ENSSSCG00000018044|ENSSSCG00000017116|ENSSSCG00000008359|ENSSSCG00000004244|ENSSSCG00000025316|ENSSSCG00000010860|ENSSSCG00000001379|ENSSSCG00000002366	ENSSSCG00000009203|ENSSSCG00000005037|ENSSSCG00000021464|ENSSSCG00000012022|ENSSSCG00000012437|ENSSSCG00000017836|ENSSSCG00000021155|ENSSSCG00000001651|ENSSSCG00000002828|ENSSSCG00000008524|ENSSSCG00000003815|ENSSSCG00000013273|ENSSSCG00000016176|ENSSSCG00000007291|ENSSSCG00000008395|ENSSSCG00000007478|ENSSSCG00000029539|ENSSSCG00000026087|ENSSSCG00000000720|ENSSSCG00000015268|ENSSSCG00000016192|…	ENSSSCG00000001080|ENSSSCG00000009123|ENSSSCG00000003749|ENSSSCG00000010931|ENSSSCG00000004244|ENSSSCG00000002446|ENSSSCG00000005060|ENSSSCG00000010683|ENSSSCG00000027230|ENSSSCG00000000700|ENSSSCG00000022820|ENSSSCG00000003790|ENSSSCG00000012061|ENSSSCG00000009010|ENSSSCG00000014967|ENSSSCG00000003815|ENSSSCG00000002709|ENSSSCG00000002722|ENSSSCG00000008517|ENSSSCG00000002283|ENSSSCG00000002667|…	680
inorganic cation import across plasma membrane	GO:0098659	2	1	-	0.00733469	0.221351	-	ENSSSCG00000009169|ENSSSCG00000000385	ENSSSCG00000006296	-	5
inorganic ion import across plasma membrane	GO:0099587	2	1	-	0.00733469	0.221351	-	ENSSSCG00000009169|ENSSSCG00000000385	ENSSSCG00000006296	-	5
zinc ion transmembrane transporter activity	GO:0005385	2	-	-	0.0096554	-	-	ENSSSCG00000009169|ENSSSCG00000000385	-	-	6
zinc ion transmembrane transport	GO:0071577	2	-	-	0.0096554	-	-	ENSSSCG00000009169|ENSSSCG00000000385	-	-	6
zinc ion transport	GO:0006829	2	-	-	0.0096554	-	-	ENSSSCG00000009169|ENSSSCG00000000385	-	-	6
amide transport	GO:0042886	13	6	9	0.0105588	0.990569	0.984093	ENSSSCG00000005386|ENSSSCG00000013726|ENSSSCG00000017705|ENSSSCG00000022155|ENSSSCG00000005711|ENSSSCG00000008359|ENSSSCG00000026293|ENSSSCG00000024927|ENSSSCG00000016140|ENSSSCG00000006731|ENSSSCG00000022864|ENSSSCG00000025316|ENSSSCG00000000097	ENSSSCG00000027139|ENSSSCG00000007291|ENSSSCG00000011567|ENSSSCG00000023247|ENSSSCG00000011196|ENSSSCG00000022236	ENSSSCG00000022155|ENSSSCG00000007812|ENSSSCG00000002722|ENSSSCG00000006403|ENSSSCG00000010631|ENSSSCG00000003405|ENSSSCG00000009010|ENSSSCG00000006168|ENSSSCG00000022222	311
organic anion transmembrane transporter activity	GO:0008514	4	3	5	0.0146543	0.312218	0.109075	ENSSSCG00000010455|ENSSSCG00000008943|ENSSSCG00000004486|ENSSSCG00000025316	ENSSSCG00000006808|ENSSSCG00000013338|ENSSSCG00000022236	ENSSSCG00000016626|ENSSSCG00000000584|ENSSSCG00000016541|ENSSSCG00000006987|ENSSSCG00000011748	45
divalent inorganic cation transmembrane transporter activity	GO:0072509	2	-	-	0.0151269	-	-	ENSSSCG00000009169|ENSSSCG00000000385	-	-	8
transition metal ion transmembrane transporter activity	GO:0046915	2	-	-	0.0290764	-	-	ENSSSCG00000009169|ENSSSCG00000000385	-	-	12
nitrogen compound transport	GO:0071705	13	11	15	0.0369954	0.916697	0.891612	ENSSSCG00000005386|ENSSSCG00000013726|ENSSSCG00000017705|ENSSSCG00000022155|ENSSSCG00000005711|ENSSSCG00000008359|ENSSSCG00000026293|ENSSSCG00000024927|ENSSSCG00000016140|ENSSSCG00000006731|ENSSSCG00000022864|ENSSSCG00000025316|ENSSSCG00000000097	ENSSSCG00000009203|ENSSSCG00000027139|ENSSSCG00000007291|ENSSSCG00000011567|ENSSSCG00000001841|ENSSSCG00000004673|ENSSSCG00000023247|ENSSSCG00000001062|ENSSSCG00000011196|ENSSSCG00000004039|ENSSSCG00000022236	ENSSSCG00000022155|ENSSSCG00000007812|ENSSSCG00000002722|ENSSSCG00000006403|ENSSSCG00000022820|ENSSSCG00000010631|ENSSSCG00000016541|ENSSSCG00000006987|ENSSSCG00000009010|ENSSSCG00000003405|ENSSSCG00000006168|ENSSSCG00000022222|ENSSSCG00000021968|ENSSSCG00000009589|ENSSSCG00000011748	372
ion transmembrane transporter activity	GO:0015075	9	13	14	0.0393842	0.18034	0.337614	ENSSSCG00000011916|ENSSSCG00000010455|ENSSSCG00000000385|ENSSSCG00000009169|ENSSSCG00000010589|ENSSSCG00000024249|ENSSSCG00000004486|ENSSSCG00000025316|ENSSSCG00000008943	ENSSSCG00000006808|ENSSSCG00000008433|ENSSSCG00000001087|ENSSSCG00000016821|ENSSSCG00000004673|ENSSSCG00000017401|ENSSSCG00000001841|ENSSSCG00000006296|ENSSSCG00000013338|ENSSSCG00000008307|ENSSSCG00000009827|ENSSSCG00000004039|ENSSSCG00000022236	ENSSSCG00000017271|ENSSSCG00000009123|ENSSSCG00000022820|ENSSSCG00000012332|ENSSSCG00000016541|ENSSSCG00000006987|ENSSSCG00000016626|ENSSSCG00000000584|ENSSSCG00000017025|ENSSSCG00000006933|ENSSSCG00000004499|ENSSSCG00000016609|ENSSSCG00000006021|ENSSSCG00000011748	226
carbohydrate derivative transport	GO:1901264	2	1	2	0.0290764	0.418543	0.157209	ENSSSCG00000025316|ENSSSCG00000004486	ENSSSCG00000004673	ENSSSCG00000022820|ENSSSCG00000016541	12
carbohydrate derivative transmembrane transporter activity	GO:1901505	2	1	1	0.0122567	0.283671	0.341474	ENSSSCG00000025316|ENSSSCG00000004486	ENSSSCG00000004673	ENSSSCG00000016541	7
protein transport	GO:0015031	12	5	9	0.0133871	0.993047	0.967327	ENSSSCG00000005386|ENSSSCG00000013726|ENSSSCG00000017705|ENSSSCG00000022155|ENSSSCG00000005711|ENSSSCG00000006731|ENSSSCG00000026293|ENSSSCG00000024927|ENSSSCG00000016140|ENSSSCG00000008359|ENSSSCG00000022864|ENSSSCG00000000097	ENSSSCG00000011567|ENSSSCG00000023247|ENSSSCG00000027139|ENSSSCG00000011196|ENSSSCG00000007291	ENSSSCG00000022155|ENSSSCG00000007812|ENSSSCG00000002722|ENSSSCG00000006403|ENSSSCG00000010631|ENSSSCG00000003405|ENSSSCG00000009010|ENSSSCG00000006168|ENSSSCG00000022222	286
organic substance transport	GO:0071702	17	17	18	0.0134568	0.775541	0.94073	ENSSSCG00000005386|ENSSSCG00000010455|ENSSSCG00000017705|ENSSSCG00000013726|ENSSSCG00000005711|ENSSSCG00000008359|ENSSSCG00000026293|ENSSSCG00000024927|ENSSSCG00000008943|ENSSSCG00000016140|ENSSSCG00000004486|ENSSSCG00000022155|ENSSSCG00000006731|ENSSSCG00000022864|ENSSSCG00000025316|ENSSSCG00000000097|ENSSSCG00000002366	ENSSSCG00000006808|ENSSSCG00000009203|ENSSSCG00000001841|ENSSSCG00000027139|ENSSSCG00000016821|ENSSSCG00000007291|ENSSSCG00000011567|ENSSSCG00000021155|ENSSSCG00000004673|ENSSSCG00000023247|ENSSSCG00000001062|ENSSSCG00000011196|ENSSSCG00000013338|ENSSSCG00000007478|ENSSSCG00000021464|ENSSSCG00000004039|ENSSSCG00000022236	ENSSSCG00000022155|ENSSSCG00000007812|ENSSSCG00000002722|ENSSSCG00000006403|ENSSSCG00000022820|ENSSSCG00000010631|ENSSSCG00000016541|ENSSSCG00000006987|ENSSSCG00000012583|ENSSSCG00000009010|ENSSSCG00000000584|ENSSSCG00000003405|ENSSSCG00000006168|ENSSSCG00000022222|ENSSSCG00000016626|ENSSSCG00000021968|ENSSSCG00000009589|ENSSSCG00000011748	468
peptide transport	GO:0015833	12	5	9	0.0193888	0.9957	0.979282	ENSSSCG00000005386|ENSSSCG00000013726|ENSSSCG00000017705|ENSSSCG00000022155|ENSSSCG00000005711|ENSSSCG00000006731|ENSSSCG00000026293|ENSSSCG00000024927|ENSSSCG00000016140|ENSSSCG00000008359|ENSSSCG00000022864|ENSSSCG00000000097	ENSSSCG00000011567|ENSSSCG00000023247|ENSSSCG00000027139|ENSSSCG00000011196|ENSSSCG00000007291	ENSSSCG00000022155|ENSSSCG00000007812|ENSSSCG00000002722|ENSSSCG00000006403|ENSSSCG00000010631|ENSSSCG00000003405|ENSSSCG00000009010|ENSSSCG00000006168|ENSSSCG00000022222	302
intracellular protein transport	GO:0006886	8	3	6	0.0238977	0.976119	0.895119	ENSSSCG00000005386|ENSSSCG00000013726|ENSSSCG00000005711|ENSSSCG00000026293|ENSSSCG00000024927|ENSSSCG00000016140|ENSSSCG00000022864|ENSSSCG00000000097	ENSSSCG00000011567|ENSSSCG00000027139|ENSSSCG00000007291	ENSSSCG00000007812|ENSSSCG00000002722|ENSSSCG00000003405|ENSSSCG00000009010|ENSSSCG00000006168|ENSSSCG00000022222	172
nucleobase-containing compound transport	GO:0015931	3	2	2	0.0366741	0.449557	0.568036	ENSSSCG00000005711|ENSSSCG00000025316|ENSSSCG00000022864	ENSSSCG00000004673|ENSSSCG00000027139	ENSSSCG00000002722|ENSSSCG00000016541	35
cholesterol efflux	GO:0033344	2	1	-	0.0418413	0.486965	-	ENSSSCG00000024927|ENSSSCG00000002366	ENSSSCG00000021464	-	15
import across plasma membrane	GO:0098739	2	1	-	0.0216294	0.367938	-	ENSSSCG00000009169|ENSSSCG00000000385	ENSSSCG00000006296	-	10
intracellular transport	GO:0046907	10	7	11	0.0329238	0.912654	0.796454	ENSSSCG00000005386|ENSSSCG00000013726|ENSSSCG00000005711|ENSSSCG00000026293|ENSSSCG00000024927|ENSSSCG00000016140|ENSSSCG00000008359|ENSSSCG00000022864|ENSSSCG00000000097|ENSSSCG00000002366	ENSSSCG00000012022|ENSSSCG00000027139|ENSSSCG00000007291|ENSSSCG00000011567|ENSSSCG00000017836|ENSSSCG00000001062|ENSSSCG00000014239	ENSSSCG00000003749|ENSSSCG00000007812|ENSSSCG00000002722|ENSSSCG00000008517|ENSSSCG00000022820|ENSSSCG00000010931|ENSSSCG00000009010|ENSSSCG00000003405|ENSSSCG00000006168|ENSSSCG00000022222|ENSSSCG00000009589	254
labyrinthine layer blood vessel development	GO:0060716	2	-	1	0.00733469	-	0.268964	ENSSSCG00000016140|ENSSSCG00000022155	-	ENSSSCG00000022155	5
placenta blood vessel development	GO:0060674	2	-	1	0.0096554	-	0.306164	ENSSSCG00000016140|ENSSSCG00000022155	-	ENSSSCG00000022155	6
cardiac ventricle development	GO:0003231	3	1	1	0.0107145	0.600634	0.683158	ENSSSCG00000001660|ENSSSCG00000003532|ENSSSCG00000022155	ENSSSCG00000014149	ENSSSCG00000022155	21
cardiac chamber development	GO:0003205	3	2	1	0.0215559	0.348137	0.780281	ENSSSCG00000001660|ENSSSCG00000003532|ENSSSCG00000022155	ENSSSCG00000014149|ENSSSCG00000004524	ENSSSCG00000022155	28
ventricular septum development	GO:0003281	2	-	-	0.02524	-	-	ENSSSCG00000001660|ENSSSCG00000003532	-	-	11
labyrinthine layer development	GO:0060711	2	1	1	0.0290764	0.418543	0.492855	ENSSSCG00000016140|ENSSSCG00000022155	ENSSSCG00000009148	ENSSSCG00000022155	12
placenta development	GO:0001890	3	1	2	0.0366741	0.777468	0.568036	ENSSSCG00000016140|ENSSSCG00000022155|ENSSSCG00000001701	ENSSSCG00000009148	ENSSSCG00000022155|ENSSSCG00000017448	35
developmental process involved in reproduction	GO:0003006	8	7	8	0.0369361	0.688671	0.785813	ENSSSCG00000022155|ENSSSCG00000016592|ENSSSCG00000001701|ENSSSCG00000016140|ENSSSCG00000024413|ENSSSCG00000001750|ENSSSCG00000011106|ENSSSCG00000016431	ENSSSCG00000027997|ENSSSCG00000016166|ENSSSCG00000016431|ENSSSCG00000017836|ENSSSCG00000004524|ENSSSCG00000009148|ENSSSCG00000017051	ENSSSCG00000016166|ENSSSCG00000022155|ENSSSCG00000016431|ENSSSCG00000005236|ENSSSCG00000016626|ENSSSCG00000015733|ENSSSCG00000009593|ENSSSCG00000017448	188
artery development	GO:0060840	2	-	1	0.0373866	-	0.54318	ENSSSCG00000022155|ENSSSCG00000003532	-	ENSSSCG00000022155	14
blood vessel development	GO:0001568	6	5	6	0.045843	0.637371	0.682648	ENSSSCG00000022155|ENSSSCG00000002873|ENSSSCG00000016140|ENSSSCG00000005625|ENSSSCG00000003532|ENSSSCG00000001660	ENSSSCG00000011567|ENSSSCG00000014899|ENSSSCG00000009148|ENSSSCG00000004587|ENSSSCG00000014149	ENSSSCG00000022155|ENSSSCG00000015399|ENSSSCG00000009664|ENSSSCG00000025188|ENSSSCG00000009589|ENSSSCG00000007721	128
germ cell development	GO:0007281	4	4	3	0.0506232	0.338986	0.707345	ENSSSCG00000001750|ENSSSCG00000024413|ENSSSCG00000016592|ENSSSCG00000016431	ENSSSCG00000027997|ENSSSCG00000017836|ENSSSCG00000016166|ENSSSCG00000016431	ENSSSCG00000016166|ENSSSCG00000016431|ENSSSCG00000016626	68
cardiac muscle cell differentiation	GO:0055007	2	1	3	0.0513041	0.528053	0.0784913	ENSSSCG00000022155|ENSSSCG00000006496	ENSSSCG00000014149	ENSSSCG00000022155|ENSSSCG00000011090|ENSSSCG00000003776	17
regulation of animal organ morphogenesis	GO:2000027	3	3	3	0.0529626	0.267221	0.389201	ENSSSCG00000001660|ENSSSCG00000022155|ENSSSCG00000012318	ENSSSCG00000002461|ENSSSCG00000004524|ENSSSCG00000000896	ENSSSCG00000009593|ENSSSCG00000022155|ENSSSCG00000012318	41
vasculature development	GO:0001944	6	5	6	0.0515595	0.663138	0.709648	ENSSSCG00000022155|ENSSSCG00000002873|ENSSSCG00000016140|ENSSSCG00000005625|ENSSSCG00000003532|ENSSSCG00000001660	ENSSSCG00000011567|ENSSSCG00000014899|ENSSSCG00000009148|ENSSSCG00000004587|ENSSSCG00000014149	ENSSSCG00000022155|ENSSSCG00000015399|ENSSSCG00000009664|ENSSSCG00000025188|ENSSSCG00000009589|ENSSSCG00000007721	132
sensory organ development	GO:0007423	5	3	3	0.0494879	0.786582	0.893494	ENSSSCG00000016140|ENSSSCG00000001660|ENSSSCG00000000385|ENSSSCG00000017116|ENSSSCG00000022155	ENSSSCG00000011567|ENSSSCG00000008618|ENSSSCG00000009148	ENSSSCG00000009593|ENSSSCG00000022155|ENSSSCG00000015733	98
calcineurin-mediated signaling	GO:0097720	2	-	-	0.00733469	-	-	ENSSSCG00000007477|ENSSSCG00000001716	-	-	5
calcineurin-NFAT signaling cascade	GO:0033173	2	-	-	0.00733469	-	-	ENSSSCG00000007477|ENSSSCG00000001716	-	-	5
transmembrane receptor protein serine/threonine kinase signaling pathway	GO:0007178	4	3	4	0.0485177	0.549012	0.490907	ENSSSCG00000025316|ENSSSCG00000005625|ENSSSCG00000000385|ENSSSCG00000022155	ENSSSCG00000009148|ENSSSCG00000004524|ENSSSCG00000000720	ENSSSCG00000009593|ENSSSCG00000022155|ENSSSCG00000009357|ENSSSCG00000002267	67
regulation of phosphatidylinositol 3-kinase signaling	GO:0014066	2	-	1	0.0513041	-	0.609471	ENSSSCG00000008300|ENSSSCG00000017705	-	ENSSSCG00000025537	17
inositol phosphate-mediated signaling	GO:0048016	2	-	-	0.0151269	-	-	ENSSSCG00000007477|ENSSSCG00000001716	-	-	8
calcium-mediated signaling	GO:0019722	3	2	2	0.0215559	0.348137	0.455552	ENSSSCG00000007477|ENSSSCG00000006059|ENSSSCG00000001716	ENSSSCG00000006059|ENSSSCG00000008433	ENSSSCG00000009664|ENSSSCG00000014264	28
protein serine/threonine phosphatase activity	GO:0004722	2	-	-	0.0290764	-	-	ENSSSCG00000001716|ENSSSCG00000024413	-	-	12
BMP signaling pathway	GO:0030509	3	2	4	0.034254	0.435586	0.125795	ENSSSCG00000025316|ENSSSCG00000000385|ENSSSCG00000022155	ENSSSCG00000009148|ENSSSCG00000004524	ENSSSCG00000009593|ENSSSCG00000022155|ENSSSCG00000009357|ENSSSCG00000002267	34
response to BMP	GO:0071772	3	2	4	0.034254	0.435586	0.125795	ENSSSCG00000025316|ENSSSCG00000000385|ENSSSCG00000022155	ENSSSCG00000009148|ENSSSCG00000004524	ENSSSCG00000009593|ENSSSCG00000022155|ENSSSCG00000009357|ENSSSCG00000002267	34
cellular response to BMP stimulus	GO:0071773	3	2	4	0.034254	0.435586	0.125795	ENSSSCG00000025316|ENSSSCG00000000385|ENSSSCG00000022155	ENSSSCG00000009148|ENSSSCG00000004524	ENSSSCG00000009593|ENSSSCG00000022155|ENSSSCG00000009357|ENSSSCG00000002267	34
regulation of multi-organism process	GO:0043900	6	3	2	0.0431399	0.901936	0.990357	ENSSSCG00000017705|ENSSSCG00000001701|ENSSSCG00000008600|ENSSSCG00000009527|ENSSSCG00000024413|ENSSSCG00000008691	ENSSSCG00000002715|ENSSSCG00000009194|ENSSSCG00000009148	ENSSSCG00000009527|ENSSSCG00000006175	126
circadian regulation of gene expression	GO:0032922	2	1	2	0.0331285	0.442307	0.175589	ENSSSCG00000012318|ENSSSCG00000011106	ENSSSCG00000015435	ENSSSCG00000012318|ENSSSCG00000015435	13
