# Supplementary material for: Detection of genomic structure variants associated with wrinkled skin in Xiang pig by next generation sequencing
Source: Aging (Albany NY). 2021 Nov 27;13(22):24710–39. doi: 10.18632/aging.203711 (PMC8660620; doi:10.18632/aging.203711)
Supplement: Supplementary Table 9 [file aging-13-203711-s006.xlsx]

## Sheet: Sheet1
Supplementary Table 9. The frequency of the 36 genes distributed in the populations.
NO.	chr	start	end	length	type	gene	Populations	Total samples	Genotype (%)			Allele frequency (%)
									DD	DI	II	D%	I%
sv_08942	5	29514283	29515175	892	INV	WIF1	WXP	43	88.37(38)	11.63(5)	0.00(0)	94.19A	5.81
							XP	78	67.95(53)	26.92(21)	5.13(4)	81.41B	18.59
							LW	74	24.32(18)	66.22(49)	9.46(7)	57.43C	42.57
sv_05473	3	27331301	27331569	268	DEL	XYLT1	WXP	43	95.35(41)	4.65(2)	0.00(0)	97.67A	2.33
							XP	78	64.10(50)	30.77(24)	5.13(4)	79.49B	20.51
							LW	74	1.35(1)	20.27(15)	78.38(58)	11.49C	88.51
sv_13380	7	89601504	89602362	858	DEL	FUT8	WXP	43	53.49(23)	13.95(6)	32.56(14)	60.47A	39.53
							XP	78	2.56(2)	0.00(0)	97.44(76)	2.56	97.44
							LW	74	0.00(0)	0.00(0)	100.00(74)	0	100
sv_09737	5	81791286	81791588	302	DEL	IGF1	WXP	43	25.58(11)	69.77(30)	4.65(2)	60.47a	39.53
							XP	78	33.33(26)	21.79(17)	44.87(35)	44.23a	55.77
							LW	74	0.00(0)	1.35(1)	98.65(73)	0.68B	99.32
sv_11764	6	147384007	147384301	294	DEL	JAK1	WXP	43	97.67(42)	2.33(1)	0.00(0)	98.84A	1.16
							XP	78	74.36(58)	25.64(20)	0.00(0)	87.18B	12.82
							LW	74	31.08(23)	40.54(30)	28.38(21)	51.35C	48.65
sv_29831	18	5418190	5419615	1425	DEL	GALNTL5	WXP	43	58.14(25)	23.26(10)	18.60(8)	69.77	30.23
							XP	78	50.00(39)	19.23(15)	30.77(24)	59.62	40.38
							LW	74	0.00(0)	10.81(8)	89.19(66)	5.41A	94.59
sv_31017	X	41214172	41214332	160	DEL	CHST7	WXP	43	100.00(43)	0.00(0)	0.00(0)	100	0
							XP	78	96.15(75)	3.85(3)	0.00(0)	98.08	1.92
							LW	74	14.86(11)	13.51(10)	71.62(53)	21.62A	78.38
sv_08467	5	715869	715955	86	DEL	ALG12	WXP	43	2.33(1)	58.14(25)	39.53(17)	31.40A	68.6
							XP	78	6.41(5)	0.00(0)	93.59(73)	6.41B	93.59
							LW	74	0.00(0)	0.00(0)	100.00(74)	0.00C	100
sv_29433	17	40526127	40526195	68	DEL	SRC	WXP	43	27.91(12)	58.14(25)	13.95(6)	56.98	43.02
							XP	78	43.59(34)	39.74(31)	16.67(13)	63.46	36.54
							LW	74	0.00(0)	4.05(3)	95.95(71)	2.03A	97.97
sv_08226	4	117421213	117421292	79	DEL	EXTL2	WXP	43	23.26(10)	20.93(9)	55.81(24)	33.72a	66.28
							XP	78	3.85(3)	23.08(18)	73.08(57)	15.38a	84.62
							LW	74	0.00(0)	0.00(0)	100.00(74)	0.00B	100
sv_02434	1	229459007	229459261	254	DEL	GCNT1	WXP	43	83.72(36)	16.28(7)	0.00(0)	91.86	8.14
							XP	78	80.77(63)	19.23(15)	0.00(0)	90.38	9.62
							LW	74	58.11(43)	37.84(28)	4.05(3)	77.03A	22.97
sv_13222	7	76426847	76427159	312	DEL	DAD1	WXP	43	81.40(35)	16.28(7)	2.33(1)	89.53	10.47
							XP	78	83.33(65)	16.67(13)	0.00(0)	91.67	8.33
							LW	74	2.70(2)	31.08(23)	66.22(49)	18.24A	81.76
sv_13416	7	93011572	93011858	286	DEL	GALNT16	WXP	43	100.00(43)	0.00(0)	0.00(0)	100	0
							XP	78	96.15(75)	0.00(0)	3.85(3)	96.15	3.85
							LW	74	2.70(2)	37.84(28)	59.46(44)	21.62A	78.38
sv_31301	X	57551725	57552001	276	DEL	OGT	WXP	43	100.00(43)	0.00(0)	0.00(0)	100	0
							XP	78	100.00(78)	0.00(0)	0.00(0)	100	0
							LW	74	0.00(0)	16.22(12)	83.78(62)	8.11A	91.89
sv_10942	6	71407644	71407932	288	DEL	MTOR	WXP	43	100.00(43)	0.00(0)	0.00(0)	100	0
							XP	78	100.00(78)	0.00(0)	0.00(0)	100	0
							LW	74	6.76(5)	0.00(0)	93.24(69)	6.76A	93.24
sv_17954	10	16514855	16515153	298	DEL	AKT3	WXP	43	100.00(43)	0.00(0)	0.00(0)	100	0
							XP	78	100.00(78)	0.00(0)	0.00(0)	100	0
							LW	74	31.08(23)	37.84(28)	31.08(23)	50.00A	50
sv_11747	6	146886903	146887222	319	DEL	LEPR	WXP	43	76.74(33)	9.30(4)	13.95(6)	81.4	18.6
							XP	78	73.08(57)	14.10(11)	12.82(10)	80.13	19.87
							LW	74	18.92(14)	43.24(32)	37.84(28)	40.54A	59.46
sv_03116	2	4541120	4541427	307	DEL	LRP5	WXP	43	100.00(43)	0.00(0)	0.00(0)	100	0
							XP	78	100.00(78)	0.00(0)	0.00(0)	100	0
							LW	74	70.27(52)	6.76(5)	22.97(17)	73.65A	26.35
sv_29125	17	17645605	17645905	300	DEL	PLCB1	WXP	43	100.00(43)	0.00(0)	0.00(0)	100.00A	0
							XP	78	82.05(64)	15.38(12)	2.56(2)	89.74B	10.26
							LW	74	9.46(7)	17.57(13)	72.97(54)	18.24C	81.76
sv_01285	1	97940349	97940450	101	DEL	ZBTB7C	WXP	43	39.53(17)	25.58(11)	34.88(15)	52.33A	47.67
							XP	78	8.97(7)	30.77(24)	60.26(47)	24.36B	75.64
							LW	74	0.00(0)	0.00(0)	100.00(74)	0.00C	100
sv_01286	1	98006602	98006896	294	DEL	ZBTB7C	WXP	43	44.19(19)	44.19(19)	11.63(5)	66.28a	33.72
							XP	78	26.92(21)	43.59(34)	29.49(23)	48.72a	51.28
							LW	74	0.00(0)	25.68(19)	74.32(55)	12.84B	87.16
sv_25218	14	134463049	134463358	309	DEL	CTBP2	WXP	43	100.00(43)	0.00(0)	0.00(0)	100	0
							XP	78	96.15(75)	3.85(3)	0.00(0)	98.08	1.92
							LW	74	4.05(3)	0.00(0)	95.95(71)	4.05A	95.95
sv_30761	X	10256511	10256813	302	DEL	EGFL6	WXP	43	83.72(36)	0.00(0)	16.28(7)	83.72	16.28
							XP	78	83.33(65)	0.00(0)	16.67(13)	83.33	16.67
							LW	74	0.00(0)	5.41(4)	94.59(70)	2.70A	97.3
sv_10342	6	12870865	12871173	308	DEL	FA2H	WXP	43	83.72(36)	11.63(5)	4.65(2)	89.53A	10.47
							XP	78	56.41(44)	34.62(27)	8.97(7)	73.72B	26.28
							LW	74	0.00(0)	21.62(16)	78.38(58)	10.81C	89.19
sv_32135	X	109358785	109359093	308	DEL	GPC4	WXP	43	79.07(34)	16.28(7)	4.65(2)	87.21A	12.79
							XP	78	32.05(25)	32.05(25)	35.90(28)	48.08	51.92
							LW	74	21.62(16)	37.84(28)	40.54(30)	40.54	59.46
sv_08498	5	3306982	3307276	294	DEL	PPARA	WXP	43	51.16(22)	25.58(11)	23.26(10)	63.95A	36.05
							XP	78	29.49(23)	16.67(13)	53.85(42)	37.82	62.18
							LW	74	12.16(9)	50.00(37)	37.84(28)	37.16	62.84
sv_24012	14	23487565	23487841	276	DEL	MMP17	WXP	43	74.42(32)	16.28(7)	9.30(4)	82.56	17.44
							XP	78	65.38(51)	30.77(24)	3.85(3)	80.77	19.23
							LW	74	0.00(0)	14.86(11)	85.14(63)	7.43A	92.57
sv_11955	6	157511195	157511492	297	DEL	DHCR24	WXP	43	4.65(2)	41.86(18)	53.49(23)	25.58a	74.42
							XP	78	0.00(0)	23.08(18)	76.92(60)	11.54a	88.46
							LW	74	0.00(0)	0.00(0)	100.00(74)	0.00B	100
sv_15600	8	132650654	132650961	307	DEL	MAPK10	WXP	43	18.60(8)	51.16(22)	30.23(13)	44.19A	55.81
							XP	78	3.85(3)	37.18(29)	58.97(46)	22.44B	77.56
							LW	74	0.00(0)	0.00(0)	100.00(74)	0.00C	100
sv_05472	3	27283820	27284082	262	DEL	XYLT1	WXP	43	100.00(43)	0.00(0)	0.00(0)	100.00A	0
							XP	78	71.79(56)	25.64(20)	2.56(2)	84.62B	15.38
							LW	74	20.27(15)	31.08(23)	48.65(36)	35.81C	64.19
sv_03788	2	48672667	48672980	313	DEL	EIF4G2	WXP	43	0.00(0)	100.00(43)	0.00(0)	50	50
							XP	78	6.41(5)	93.59(73)	0.00(0)	53.21	46.79
							LW	74	8.11(6)	91.89(68)	0.00(0)	54.05	45.95
sv_03789	2	48673120	48673212	92	DEL	EIF4G2	WXP	43	0.00(0)	100.00(43)	0.00(0)	50	50
							XP	78	0.00(0)	100.00(78)	0.00(0)	50	50
							LW	74	0.00(0)	100.00(74)	0.00(0)	50	50
sv_01051	1	74645288	74645365	77	DEL	FOXO3	WXP	43	0.00(0)	23.26(10)	76.74(33)	11.63A	88.37
							XP	78	0.00(0)	0.00(0)	100.00(78)	0	100
							LW	74	0.00(0)	2.70(2)	97.30(72)	1.35	98.65
sv_04626	2	129802694	129802969	275	DEL	LMNB1	WXP	43	6.98(3)	67.44(29)	25.58(11)	40.7	59.3
							XP	78	14.10(11)	38.46(30)	47.44(37)	33.33	66.67
							LW	74	1.35(1)	25.68(19)	72.97(54)	14.19A	85.81
sv_08996	5	33175088	33175088	88	INS	MDM2	WXP	43	11.63(5)	76.74(33)	11.63(5)	50.00A	50
							XP	78	75.64(59)	19.23(15)	5.13(4)	85.26	14.74
							LW	74	81.08(60)	18.92(14)	0.00(0)	90.54	9.46
sv_20057	12	1754287	1754351	64	DEL	RPTOR	WXP	43	2.33(1)	18.60(8)	79.07(34)	11.63a	88.37
							XP	78	5.13(4)	37.18(29)	57.69(45)	23.72a	76.28
							LW	74	0.00(0)	4.05(3)	95.95(71)	2.03B	97.97
sv_07988	4	103498496	103498560	64	DEL	VTCN1	WXP	43	11.63(5)	55.81(24)	32.56(14)	39.53A	60.47
							XP	78	6.41(5)	0.00(0)	93.59(73)	6.41	93.59
							LW	74	0.00(0)	2.70(2)	97.30(72)	1.35	98.65
sv_20346	12	17659189	17659247	58	DEL	WNT3	WXP	43	6.98(3)	58.14(25)	34.88(15)	36.05a	63.95
							XP	78	28.21(22)	44.87(35)	26.92(21)	50.64a	49.36
							LW	74	2.70(2)	25.68(19)	71.62(53)	15.54B	84.46
A, B, C and a,b denote P < 0.01, P < 0.05, respectively, two-tailed t test.
