# Supplementary material for: Detection of genomic structure variants associated with wrinkled skin in Xiang pig by next generation sequencing
Source: Aging (Albany NY). 2021 Nov 27;13(22):24710–39. doi: 10.18632/aging.203711 (PMC8660620; doi:10.18632/aging.203711)
Supplement: Supplementary Table 10 [file aging-13-203711-s007.xlsx]

## Sheet: Sheet1
Supplementary Table 10. Differentially expressed genes.
Row.names	geneSymbol	baseMean	log2FoldChange	lfcSE	stat	pvalue	padj	XP5	XP6	XP7	Ave	WXP5	WXP6	WXP7	Ave	FC	log2FoldChange
ENSSSCG00000002476	SERPINA1	59.9255	-8.44812	3.12393	-2.70432	0.00684434	0.334944	0	43.6654	315.002	119.556	0	0	0.88518	0.29506	0.00246797	-8.66246
ENSSSCG00000016313	HJURP	2.16444	-3.57999	1.84635	-1.93896	0.0525065	NA	1.18252	3.35888	7.56005	4.03382	0	0	0.88518	0.29506	0.0731466	-3.77307
ENSSSCG00000030469	BUB1	5.79498	-3.51511	1.45782	-2.41122	0.0158994	NA	1.18252	8.957	21.8402	10.6599	1.01982	0	1.77036	0.930062	0.0872487	-3.51872
ENSSSCG00000004554	PCLAF	5.32837	-3.3844	1.46546	-2.30944	0.020919	NA	1.18252	7.83738	20.1601	9.72668	1.01982	0	1.77036	0.930062	0.0956196	-3.38655
ENSSSCG00000010922	ELF3	1.26754	-2.73166	3.06981	-0.889848	0.373548	NA	0	0	6.72005	2.24002	0	0	0.88518	0.29506	0.131722	-2.92443
ENSSSCG00000007899	-	8.60948	-2.55981	1.00801	-2.53948	0.0111016	0.43703	3.54757	14.5551	26.0402	14.7143	2.03965	1.93362	3.54072	2.50466	0.17022	-2.55453
ENSSSCG00000001660	PTK7	38.7861	-2.28819	1.13826	-2.01025	0.0444051	0.710151	4.73009	21.2729	167.161	64.3881	5.09912	9.6681	24.785	13.1841	0.20476	-2.288
ENSSSCG00000012104	-	5.09504	-2.17946	1.18356	-1.84145	0.0655552	NA	2.36505	6.71775	15.9601	8.34764	1.01982	0.96681	3.54072	1.84245	0.220715	-2.17974
ENSSSCG00000037307	PRC1	7.78622	-2.18949	1.08723	-2.01383	0.044027	0.707261	3.54757	7.83738	26.8802	12.755	3.05947	0.96681	4.4259	2.81739	0.220885	-2.17863
ENSSSCG00000028976	PPP2R2B	5.38547	-2.19079	1.37445	-1.59393	0.110951	NA	1.18252	3.35888	21.8402	8.79385	4.0793	0.96681	0.88518	1.9771	0.224827	-2.15311
ENSSSCG00000000528	PKP2	5.3948	-2.03654	1.70099	-1.19727	0.2312	NA	0	6.71775	19.3201	8.6793	1.01982	0	5.31108	2.1103	0.243142	-2.04013
ENSSSCG00000016679	-	19.2999	-1.9278	0.969273	-1.98892	0.0467103	0.723336	7.09514	15.6748	68.8805	30.5501	6.11895	3.86724	14.1629	8.04969	0.263491	-1.92417
ENSSSCG00000017645	TEX14	0.624619	-1.49817	2.79373	-0.536261	0.591778	NA	1.18252	0	1.68001	0.954178	0	0	0.88518	0.29506	0.309229	-1.69325
ENSSSCG00000040184	LMO7	12.6332	-1.63969	0.957797	-1.71194	0.0869072	0.881893	4.73009	15.6748	36.9603	19.1217	3.05947	3.86724	11.5073	6.14469	0.321346	-1.6378
ENSSSCG00000015543	CACNA1E	3.12769	-1.61508	1.23544	-1.3073	0.191112	NA	2.36505	3.35888	8.40006	4.70799	1.01982	0.96681	2.65554	1.54739	0.328673	-1.60527
ENSSSCG00000001076	RNF144B	22.0171	-1.57683	0.74965	-2.10342	0.035429	0.664495	18.9204	27.9906	52.0804	32.9971	5.09912	6.76767	21.2443	11.037	0.334485	-1.57999
ENSSSCG00000029096	HRH2	1.2612	-1.60299	1.82064	-0.880456	0.378612	NA	1.18252	1.11963	3.36002	1.88739	1.01982	0	0.88518	0.635002	0.336444	-1.57156
ENSSSCG00000022402	GRAMD2B	22.9006	-1.57459	0.705506	-2.23186	0.0256245	0.591252	16.5553	25.7514	60.4804	34.2624	9.17842	7.73448	17.7036	11.5388	0.336779	-1.57013
ENSSSCG00000016437	WDR86	25.9446	-1.47592	0.561797	-2.62714	0.0086106	0.379453	42.5708	40.3065	31.9202	38.2659	7.13877	11.6017	22.1295	13.6233	0.356018	-1.48998
ENSSSCG00000023187	VAV3	22.9255	-1.48916	0.898591	-1.65721	0.0974766	0.903087	5.91262	32.4691	63.0004	33.7941	8.1586	6.76767	21.2443	12.0569	0.356775	-1.48692
ENSSSCG00000001483	FAM83B	9.46107	-1.47034	2.09776	-0.700911	0.483359	0.998184	0	5.59813	36.1203	13.9061	0	0	15.0481	5.01602	0.360706	-1.47111
ENSSSCG00000027935	FHOD3	10.0488	-1.4407	1.006	-1.43211	0.152113	0.990251	3.54757	6.71775	33.6002	14.6219	6.11895	6.76767	3.54072	5.47578	0.374493	-1.41699
ENSSSCG00000031713	MACROH2A2	3.97366	-1.40564	1.06679	-1.31763	0.187626	NA	3.54757	4.4785	9.24007	5.75538	1.01982	2.90043	2.65554	2.19193	0.380849	-1.39271
ENSSSCG00000005995	MTBP	1.1212	-1.36508	1.85184	-0.737148	0.461032	NA	1.18252	1.11963	2.52002	1.60739	1.01982	0	0.88518	0.635002	0.395052	-1.33989
ENSSSCG00000032392	-	3.62323	-1.29949	1.50471	-0.863616	0.387799	NA	1.18252	3.35888	10.9201	5.15383	0	0.96681	5.31108	2.09263	0.406034	-1.30033
ENSSSCG00000022034	SMYD3	7.82388	-1.1739	0.801182	-1.46521	0.142863	0.978541	14.1903	13.4355	5.04004	10.8886	5.09912	3.86724	5.31108	4.75915	0.437076	-1.19404
ENSSSCG00000009169	SLC39A8	70.0737	-1.15125	0.676076	-1.70283	0.0885991	0.887394	48.4835	43.6654	197.401	96.5167	56.0903	36.7388	38.0627	43.6306	0.452052	-1.14544
ENSSSCG00000016687	-	8.04862	-1.14446	1.08358	-1.05619	0.290882	0.998184	1.18252	6.71775	25.2002	11.0335	4.0793	5.80086	5.31108	5.06375	0.458944	-1.12361
ENSSSCG00000016763	GLI3	44.1158	-1.12842	0.722918	-1.56092	0.118543	0.937738	26.0155	36.9476	118.441	60.468	14.2775	41.5728	27.4406	27.7637	0.459146	-1.12297
ENSSSCG00000003807	DNAJC6	20.9843	-1.10588	0.68326	-1.61854	0.105547	0.920025	24.833	47.0243	14.2801	28.7124	15.2974	6.76767	17.7036	13.2562	0.461689	-1.11501
ENSSSCG00000003914	PRDX1	230.184	-1.10875	0.57625	-1.92408	0.054344	0.769552	439.899	382.912	120.961	314.59	204.985	88.9465	143.399	145.777	0.463386	-1.10971
ENSSSCG00000000118	MICALL1	45.1751	-1.07349	0.514573	-2.08618	0.0369619	0.670519	41.3883	51.5028	90.7206	61.2039	18.3568	31.9047	37.1776	29.1464	0.476218	-1.07031
ENSSSCG00000027019	CACNA2D3	1.91724	-1.00065	1.41841	-0.705469	0.480519	NA	3.54757	3.35888	0.840006	2.58215	1.01982	0.96681	1.77036	1.25233	0.484996	-1.04396
ENSSSCG00000013339	ANO3	5.40034	-1.06622	1.08889	-0.979176	0.327493	NA	3.54757	2.23925	15.9601	7.24898	5.09912	2.90043	2.65554	3.5517	0.489958	-1.02927
ENSSSCG00000017317	WNT3	10.2857	-0.990168	1.37615	-0.719521	0.47182	0.998184	2.36505	3.35888	35.2803	13.6681	2.03965	0.96681	17.7036	6.90335	0.505072	-0.985439
ENSSSCG00000030386	NUP205	121.063	-0.949161	0.650982	-1.45805	0.144828	0.978541	258.973	173.542	46.2003	159.572	119.319	62.8427	65.5033	82.5552	0.517355	-0.950774
ENSSSCG00000000934	LRRIQ1	0.924108	-0.978581	2.19053	-0.446732	0.655068	NA	0	1.11963	2.52002	1.21321	1.01982	0	0.88518	0.635002	0.523404	-0.934003
ENSSSCG00000012318	MAGED1	94.2098	-0.924321	0.422407	-2.18822	0.0286534	0.611556	170.283	118.68	81.4806	123.481	63.2291	80.2453	51.3404	64.9383	0.525895	-0.927153
ENSSSCG00000039940	NELL1	0.427532	-0.763355	3.92102	-0.194683	0.845641	NA	0	0	1.68001	0.560004	0	0	0.88518	0.29506	0.526889	-0.924429
ENSSSCG00000010589	SFXN2	15.6676	-0.900361	0.601938	-1.49577	0.134714	0.963738	16.5553	24.6318	20.1601	20.4491	7.13877	8.70129	16.8184	10.8862	0.532355	-0.90954
ENSSSCG00000028076	ZBTB7C	9.74778	-0.902278	0.909557	-0.991997	0.321199	0.998184	3.54757	10.0766	24.3602	12.6615	4.0793	5.80086	10.6222	6.83411	0.539757	-0.889619
ENSSSCG00000037559	ACOT11	7.06382	-0.887568	0.874863	-1.01452	0.310333	0.998184	4.73009	6.71775	15.9601	9.13599	3.05947	4.83405	7.08144	4.99166	0.546373	-0.872042
ENSSSCG00000004071	-	15.4152	-0.858821	0.604808	-1.41999	0.155611	0.993228	13.0078	17.914	28.5602	19.8273	9.17842	9.6681	14.1629	11.0031	0.554948	-0.849575
ENSSSCG00000023920	P3H1	178.282	-0.844681	0.37657	-2.24309	0.0248907	0.587913	204.577	179.14	303.242	228.986	95.8635	126.652	160.218	127.578	0.557142	-0.843884
ENSSSCG00000029808	EIF2B3	22.6498	-0.850174	0.55942	-1.51974	0.128576	0.955979	16.5553	26.871	43.6803	29.0355	18.3568	14.5022	15.9332	16.2641	0.560144	-0.836131
ENSSSCG00000010278	CDH23	18.1719	-0.851946	0.81387	-1.04678	0.295199	0.998184	8.27766	11.1963	50.4004	23.2914	14.2775	11.6017	13.2777	13.0523	0.560392	-0.835492
ENSSSCG00000010860	-	32.5423	-0.841731	0.492339	-1.70966	0.0873291	0.881893	30.7456	34.7084	59.6404	41.6981	17.337	28.0375	24.785	23.3865	0.560853	-0.834306
ENSSSCG00000016431	GALNTL5	8.78164	-0.809732	1.27234	-0.636414	0.524507	0.998184	22.4679	11.1963	0	11.2214	8.1586	2.90043	7.96662	6.34188	0.56516	-0.823269
ENSSSCG00000009186	METAP1	18.8521	-0.823436	0.526772	-1.56317	0.118012	0.937738	17.7378	22.3925	31.9202	24.0169	15.2974	11.6017	14.1629	13.6873	0.569905	-0.811207
ENSSSCG00000005484	ZNF618	18.418	-0.802075	0.567902	-1.41235	0.157848	0.997002	21.2854	21.2729	27.7202	23.4262	7.13877	14.5022	18.5888	13.4099	0.572433	-0.804822
ENSSSCG00000028821	SASS6	4.74847	-0.803827	0.911286	-0.88208	0.377733	NA	3.54757	7.83738	6.72005	6.035	3.05947	2.90043	4.4259	3.46193	0.573643	-0.801775
ENSSSCG00000021874	UNC5C	0.441137	-0.764051	3.88278	-0.19678	0.844	NA	0	0	1.68001	0.560004	0	0.96681	0	0.32227	0.575478	-0.797167
ENSSSCG00000005625	ENG	281.313	-0.795886	0.59975	-1.32703	0.184498	0.998184	558.151	406.424	106.681	357.085	247.817	205.931	162.873	205.54	0.575606	-0.796847
ENSSSCG00000010576	NOLC1	61.5363	-0.797272	0.408989	-1.94938	0.0512506	0.75142	52.031	76.1345	105.841	78.0021	44.8723	42.5397	47.7997	45.0706	0.577812	-0.791328
ENSSSCG00000017783	-	80.8923	-0.786332	0.568501	-1.38317	0.166614	0.998184	57.9436	61.5794	187.321	102.281	48.9516	66.7099	62.8478	59.5031	0.581758	-0.781508
ENSSSCG00000000837	CHST11	6.02022	-0.772019	0.801017	-0.963798	0.335147	NA	8.27766	7.83738	6.72005	7.6117	3.05947	5.80086	4.4259	4.42875	0.581834	-0.78132
ENSSSCG00000027952	ADCY5	91.8258	-0.750882	0.715369	-1.04964	0.293882	0.998184	151.363	170.183	24.3602	115.302	40.793	79.2784	84.9773	68.3496	0.592787	-0.754414
ENSSSCG00000017186	RNF157	19.2578	-0.734597	0.541885	-1.35563	0.175216	0.998184	24.833	17.914	29.4002	24.0491	9.17842	17.4026	16.8184	14.4665	0.60154	-0.733267
ENSSSCG00000001816	BLM	2.94394	-0.757932	1.26668	-0.59836	0.5496	NA	1.18252	2.23925	7.56005	3.66061	3.05947	0.96681	2.65554	2.22727	0.608444	-0.716804
ENSSSCG00000004368	PREP	49.8998	-0.718707	0.505127	-1.42282	0.154787	0.991573	44.9359	42.5458	98.2807	61.9208	47.9317	33.8384	31.8665	37.8789	0.611731	-0.709031
ENSSSCG00000011020	JCAD	178.923	-0.701375	0.699593	-1.00255	0.316079	0.998184	425.708	191.456	47.8803	221.682	127.478	141.154	139.858	136.164	0.614231	-0.703147
ENSSSCG00000036686	CDC42SE2	57.704	-0.691721	0.373717	-1.85092	0.0641812	0.799252	86.3242	75.0149	52.9204	71.4198	39.7732	43.5065	48.6849	43.9882	0.61591	-0.699209
ENSSSCG00000027415	WWOX	3.71728	-0.656941	0.981117	-0.669585	0.503122	NA	4.73009	5.59813	3.36002	4.56275	3.05947	2.90043	2.65554	2.87181	0.629405	-0.66794
ENSSSCG00000012066	KCNJ15	0.761666	-0.658875	2.67457	-0.246348	0.805413	NA	0	1.11963	1.68001	0.933212	0	0	1.77036	0.59012	0.632353	-0.661197
ENSSSCG00000013270	CRY2	165.736	-0.655305	0.723653	-0.905552	0.365173	0.998184	342.932	216.088	49.5604	202.86	58.13	159.524	168.184	128.613	0.633997	-0.657451
ENSSSCG00000003532	LUZP1	46.1364	-0.650647	0.400469	-1.62471	0.104224	0.920025	46.1184	50.3831	72.2405	56.2473	41.8128	29.9711	36.2924	36.0254	0.640482	-0.642769
ENSSSCG00000026346	UBE3D	4.43234	-0.641043	0.903212	-0.709737	0.477867	NA	4.73009	5.59813	5.88004	5.40275	3.05947	2.90043	4.4259	3.46193	0.640772	-0.642116
ENSSSCG00000031771	TSHR	12.6277	-0.626589	1.18606	-0.528295	0.597294	0.998184	24.833	21.2729	0	15.3686	8.1586	13.5353	7.96662	9.88685	0.643314	-0.636404
ENSSSCG00000001716	RCAN2	7.64315	-0.58474	0.844086	-0.692749	0.488467	0.998184	15.3728	8.957	3.36002	9.22994	7.13877	4.83405	6.19626	6.05636	0.656165	-0.60787
ENSSSCG00000008785	FAM114A1	74.2602	-0.60089	0.641239	-0.937077	0.348719	0.998184	127.713	117.561	23.5202	89.5978	66.2886	60.909	49.5701	58.9226	0.657634	-0.604642
ENSSSCG00000007046	TRMT6	27.2768	-0.586018	0.470938	-1.24436	0.213366	0.998184	24.833	38.0673	35.2803	32.7268	23.456	15.469	26.5554	21.8268	0.666938	-0.584375
ENSSSCG00000004486	SLC17A5	18.5218	-0.554783	0.544331	-1.0192	0.308107	0.998184	27.198	25.7514	13.4401	22.1298	13.2577	16.4358	15.0481	14.9139	0.673925	-0.56934
ENSSSCG00000009523	-	31.5714	-0.54324	0.537196	-1.01125	0.311896	0.998184	49.666	40.3065	22.6802	37.5509	28.5551	15.469	32.7517	25.5919	0.681526	-0.553159
ENSSSCG00000006701	CHD1L	29.3691	-0.547962	0.439241	-1.24752	0.212207	0.998184	29.5631	30.2299	44.5203	34.7711	27.5353	22.2366	22.1295	23.9671	0.689283	-0.536831
ENSSSCG00000009023	DCLK2	8.44614	-0.509512	0.734089	-0.694074	0.487636	0.998184	10.6427	13.4355	5.88004	9.98608	5.09912	6.76767	8.8518	6.9062	0.691582	-0.532027
ENSSSCG00000015131	GRIK4	4.61931	-0.549376	0.949994	-0.578294	0.563066	NA	2.36505	5.59813	8.40006	5.45441	3.05947	3.86724	4.4259	3.7842	0.693788	-0.527433
ENSSSCG00000013347	PRMT3	11.1361	-0.534812	0.638276	-0.837901	0.402086	0.998184	9.46019	12.3159	17.6401	13.1387	8.1586	7.73448	11.5073	9.13347	0.695157	-0.52459
ENSSSCG00000001750	PAQR8	8.53735	-0.549929	0.798418	-0.688773	0.490966	0.998184	4.73009	7.83738	17.6401	10.0692	6.11895	8.70129	6.19626	7.0055	0.695736	-0.523389
ENSSSCG00000033175	SASH1	116.481	-0.517652	0.360121	-1.43744	0.150594	0.988052	138.355	176.901	96.6007	137.286	86.6851	108.283	92.0587	95.6755	0.696909	-0.520958
ENSSSCG00000032092	DDX5	446.068	-0.520643	0.280271	-1.85764	0.0632204	0.79839	530.953	484.798	561.124	525.625	435.465	285.209	378.857	366.51	0.697285	-0.520179
ENSSSCG00000028996	ALDH1A1	131.072	-0.516336	0.501885	-1.02879	0.303577	0.998184	247.147	110.843	105.001	154.33	152.974	89.9134	80.5514	107.813	0.698585	-0.517493
ENSSSCG00000001701	HSP90AB1	547.263	-0.506933	0.374189	-1.35475	0.175498	0.998184	663.396	660.579	603.124	642.366	666.965	366.421	323.091	452.159	0.703896	-0.506566
ENSSSCG00000009129	TIFA	3.80937	-0.495489	0.967336	-0.51222	0.608497	NA	4.73009	4.4785	4.20003	4.46954	2.03965	3.86724	3.54072	3.1492	0.704592	-0.50514
ENSSSCG00000003798	SERBP1	337.291	-0.505933	0.378794	-1.33564	0.181667	0.998184	251.877	380.673	554.404	395.651	296.769	252.337	287.684	278.93	0.704989	-0.504327
ENSSSCG00000027986	ABCB8	83.9045	-0.498797	0.328455	-1.51861	0.128859	0.955979	113.522	97.4074	84.0006	98.3101	75.467	76.378	56.6515	69.4988	0.706935	-0.50035
ENSSSCG00000040847	AP1S3	2.31049	-0.547213	1.45244	-0.376754	0.706356	NA	0	2.23925	5.88004	2.70643	2.03965	1.93362	1.77036	1.91454	0.707405	-0.499391
ENSSSCG00000024413	PPP2R1A	283.041	-0.49929	0.226231	-2.20699	0.0273146	0.603786	326.376	316.854	351.122	331.451	249.857	219.466	234.573	234.632	0.707893	-0.498396
ENSSSCG00000005250	APBA1	7.79307	-0.510149	0.740092	-0.689306	0.490631	0.998184	9.46019	7.83738	10.0801	9.12588	7.13877	8.70129	3.54072	6.46026	0.707906	-0.498371
ENSSSCG00000005585	DENND1A	21.0961	-0.496038	0.455028	-1.09013	0.275657	0.998184	24.833	25.7514	23.5202	24.7015	16.3172	19.3362	16.8184	17.4906	0.708078	-0.498019
ENSSSCG00000014394	RNF14	69.0828	-0.469165	0.319155	-1.47002	0.141556	0.976447	86.3242	77.2541	77.2805	80.2863	56.0903	50.2741	67.2737	57.8794	0.720912	-0.472104
ENSSSCG00000004602	TEX9	1.14233	-0.490274	1.64715	-0.29765	0.76597	NA	1.18252	1.11963	1.68001	1.32739	1.01982	0.96681	0.88518	0.957272	0.72117	-0.471589
ENSSSCG00000008753	ADGRA3	44.6181	-0.469565	0.370829	-1.26626	0.205421	0.998184	46.1184	57.1009	52.0804	51.7666	39.7732	42.5397	30.0961	37.4696	0.72382	-0.466298
ENSSSCG00000017311	MAPT	14.4821	-0.473506	0.78522	-0.603024	0.546493	0.998184	15.3728	5.59813	29.4002	16.7904	10.1982	7.73448	18.5888	12.1738	0.725048	-0.463851
ENSSSCG00000031981	SHISA4	48.8307	-0.449376	0.460691	-0.975439	0.329343	0.998184	67.4038	66.0579	36.1203	56.5273	28.5551	43.5065	51.3404	41.134	0.727683	-0.458617
ENSSSCG00000024232	CCDC91	15.4586	-0.433186	0.555453	-0.779878	0.435462	0.998184	18.9204	20.1533	14.2801	17.7846	17.337	9.6681	12.3925	13.1325	0.738423	-0.43748
ENSSSCG00000010599	PDCD11	46.5415	-0.443029	0.522626	-0.847699	0.396606	0.998184	36.6582	34.7084	89.0406	53.4691	45.8921	35.772	37.1776	39.6139	0.740875	-0.432699
ENSSSCG00000010943	AOPEP	93.4487	-0.430396	0.288611	-1.49127	0.135891	0.96589	100.514	116.441	105.001	107.319	70.3679	86.0461	82.3217	79.5786	0.741516	-0.43145
ENSSSCG00000016877	NNT	56.7433	-0.415856	0.584641	-0.711302	0.476897	0.998184	106.427	61.5794	26.8802	64.9622	64.2489	40.606	40.7183	48.5244	0.746964	-0.42089
ENSSSCG00000022864	EIF6	164.935	-0.420493	0.455142	-0.923872	0.355553	0.998184	157.276	151.149	257.882	188.769	94.8437	116.017	212.443	141.101	0.747482	-0.419889
ENSSSCG00000008467	EML4	28.762	-0.420991	0.423095	-0.995026	0.319724	0.998184	29.5631	31.3495	37.8003	32.9043	20.3965	25.1371	28.3258	24.6198	0.748224	-0.418458
ENSSSCG00000011916	ATP6V1A	58.8243	-0.409498	0.357893	-1.14419	0.252544	0.998184	80.4116	68.2971	52.9204	67.2097	57.1102	46.4069	47.7997	50.4389	0.750471	-0.414132
ENSSSCG00000040954	CSTF3	30.2417	-0.416429	0.462687	-0.900023	0.368108	0.998184	27.198	36.9476	39.4803	34.542	28.5551	17.4026	31.8665	25.9414	0.75101	-0.413095
ENSSSCG00000004081	-	2.1793	-0.379283	1.27013	-0.298617	0.765233	NA	3.54757	2.23925	1.68001	2.48894	1.01982	1.93362	2.65554	1.86966	0.751187	-0.412756
ENSSSCG00000004221	HINT3	20.5735	-0.398886	0.49511	-0.80565	0.420445	0.998184	24.833	27.9906	17.6401	23.4879	15.2974	16.4358	21.2443	17.6592	0.75184	-0.411502
ENSSSCG00000016743	OGDH	374.663	-0.406869	0.339064	-1.19998	0.230148	0.998184	519.128	446.73	315.842	427.233	398.751	305.512	262.013	322.092	0.753902	-0.407551
ENSSSCG00000005375	CORO2A	7.78893	-0.434598	0.784238	-0.554166	0.579465	0.998184	5.91262	5.59813	15.1201	8.87695	7.13877	6.76767	6.19626	6.7009	0.754865	-0.405709
ENSSSCG00000039522	SHISAL1	15.1072	-0.388607	0.645397	-0.602122	0.547093	0.998184	28.3806	12.3159	10.9201	17.2055	10.1982	16.4358	12.3925	13.0088	0.756086	-0.403377
ENSSSCG00000006873	FRRS1	22.0038	-0.405612	0.469121	-0.864621	0.387247	0.998184	22.4679	22.3925	30.2402	25.0336	18.3568	16.4358	22.1295	18.974	0.757944	-0.399836
ENSSSCG00000000488	MDM2	32.3544	-0.392797	0.391971	-1.00211	0.316291	0.998184	36.6582	39.1869	34.4402	36.7618	29.5749	24.1703	30.0961	27.9471	0.760221	-0.395508
ENSSSCG00000024927	STX12	61.3353	-0.389513	0.443206	-0.878853	0.379481	0.998184	87.5067	76.1345	45.3603	69.6672	67.3084	37.7056	53.996	53.0033	0.760808	-0.394396
ENSSSCG00000010926	SYT2	3.89503	-0.347838	1.13924	-0.305325	0.760119	NA	7.09514	4.4785	1.68001	4.41788	1.01982	2.90043	6.19626	3.37217	0.7633	-0.389677
ENSSSCG00000007481	ZFP64	19.9887	-0.400979	0.648974	-0.617866	0.536664	0.998184	14.1903	13.4355	40.3203	22.6487	13.2577	18.3694	20.3591	17.3288	0.765111	-0.38626
ENSSSCG00000010514	RRP12	43.6917	-0.385724	0.446685	-0.863524	0.387849	0.998184	36.6582	39.1869	72.2405	49.3619	34.674	38.6724	40.7183	38.0216	0.770262	-0.376579
ENSSSCG00000017735	RHOT1	30.7094	-0.354207	0.450612	-0.786057	0.431834	0.998184	40.2058	34.7084	28.5602	34.4915	35.6939	20.303	24.785	26.9273	0.780695	-0.357169
ENSSSCG00000002428	TTC8	6.24703	-0.371958	0.80247	-0.463517	0.642994	NA	5.91262	6.71775	8.40006	7.01014	8.1586	3.86724	4.4259	5.48391	0.782283	-0.354238
ENSSSCG00000013405	EIF4G2	654.395	-0.351694	0.271541	-1.29518	0.195258	0.998184	774.553	741.192	685.445	733.73	698.58	563.65	462.949	575.06	0.783749	-0.351537
ENSSSCG00000008621	NBAS	30.5952	-0.350681	0.496856	-0.7058	0.480312	0.998184	36.6582	32.4691	33.6002	34.2425	39.7732	25.1371	15.9332	26.9478	0.786969	-0.345621
ENSSSCG00000012233	SYTL5	1.08524	-0.402902	1.83965	-0.21901	0.826642	NA	0	1.11963	2.52002	1.21321	1.01982	0.96681	0.88518	0.957272	0.789037	-0.341834
ENSSSCG00000026499	NMT2	9.72406	-0.328823	0.649885	-0.50597	0.612877	0.998184	13.0078	11.1963	8.40006	10.868	7.13877	10.6349	7.96662	8.5801	0.789481	-0.341023
ENSSSCG00000005599	RABEPK	5.76432	-0.361654	0.85004	-0.425456	0.670505	NA	4.73009	4.4785	10.0801	6.42955	6.11895	3.86724	5.31108	5.09909	0.79307	-0.334479
ENSSSCG00000016140	FZD5	7.16934	-0.365536	0.897929	-0.407088	0.683944	0.998184	3.54757	4.4785	15.9601	7.99539	5.09912	7.73448	6.19626	6.34329	0.793368	-0.333938
ENSSSCG00000024249	GABRR2	3.99111	-0.30905	1.13721	-0.271761	0.785806	NA	3.54757	8.957	0.840006	4.44819	4.0793	3.86724	2.65554	3.53403	0.794486	-0.331906
ENSSSCG00000031509	MTMR12	21.8499	-0.322282	0.471175	-0.683997	0.493977	0.998184	30.7456	21.2729	21.0001	24.3395	17.337	21.2698	19.474	19.3603	0.795424	-0.330203
ENSSSCG00000004561	HERC1	60.1721	-0.324134	0.374082	-0.866479	0.386228	0.998184	80.4116	72.7756	47.8803	67.0225	56.0903	56.075	47.7997	53.3217	0.795579	-0.329923
ENSSSCG00000035025	ADGRV1	3.55917	-0.293015	1.05556	-0.277592	0.781325	NA	7.09514	2.23925	2.52002	3.95147	3.05947	2.90043	3.54072	3.16687	0.801442	-0.319329
ENSSSCG00000010030	EIF4ENIF1	35.0401	-0.314435	0.403843	-0.778606	0.436212	0.998184	35.4757	34.7084	46.2003	38.7948	25.4956	33.8384	34.522	31.2853	0.806431	-0.310377
ENSSSCG00000013470	MRPS33	29.6797	-0.323811	0.520182	-0.622495	0.533616	0.998184	21.2854	26.871	50.4004	32.8523	31.6146	22.2366	25.6702	26.5071	0.806859	-0.309612
ENSSSCG00000002873	GPI	306.018	-0.30881	0.327703	-0.942346	0.346016	0.998184	381.955	345.964	288.122	338.68	359.998	217.532	242.539	273.357	0.807122	-0.309141
ENSSSCG00000001379	TUBB	19.3252	-0.32141	0.597773	-0.537678	0.590799	0.998184	16.5553	22.3925	25.2002	21.3827	26.5154	16.4358	8.8518	17.2677	0.807554	-0.308368
ENSSSCG00000024809	CLCN4	4.62676	-0.330363	0.932548	-0.354259	0.723145	NA	3.54757	3.35888	8.40006	5.10217	4.0793	4.83405	3.54072	4.15136	0.813646	-0.297528
ENSSSCG00000031510	FNTA	32.341	-0.287349	0.396317	-0.725048	0.468422	0.998184	37.8407	36.9476	31.9202	35.5695	31.6146	30.9379	24.785	29.1125	0.818468	-0.289003
ENSSSCG00000021384	BRIP1	1.71739	-0.312379	1.45548	-0.214622	0.830062	NA	1.18252	1.11963	3.36002	1.88739	1.01982	0.96681	2.65554	1.54739	0.819858	-0.286555
ENSSSCG00000016857	DAB2	142.441	-0.283492	0.665506	-0.42598	0.670123	0.998184	254.242	179.14	36.1203	156.501	131.557	151.789	101.796	128.381	0.820319	-0.285742
ENSSSCG00000001582	MDGA1	4.65463	-0.264441	0.992419	-0.266461	0.789884	NA	9.46019	3.35888	2.52002	5.11303	5.09912	4.83405	2.65554	4.19624	0.820696	-0.285081
ENSSSCG00000000097	-	63.3785	-0.285457	0.335782	-0.850125	0.395256	0.998184	62.6737	62.699	83.1606	69.5111	61.1895	51.2409	59.3071	57.2458	0.823549	-0.280073
ENSSSCG00000009611	XPO7	54.4098	-0.282311	0.327727	-0.861421	0.389006	0.998184	59.1262	55.9813	63.8405	59.6493	52.011	51.2409	44.259	49.1703	0.824324	-0.278717
ENSSSCG00000011215	OXSM	9.25779	-0.261393	0.754744	-0.346334	0.729092	0.998184	14.1903	11.1963	5.04004	10.1422	12.2379	5.80086	7.08144	8.3734	0.825601	-0.276484
ENSSSCG00000023862	MTMR8	8.47329	-0.28951	0.686184	-0.421913	0.673089	0.998184	7.09514	8.957	11.7601	9.27074	9.17842	6.76767	7.08144	7.67584	0.827964	-0.272359
ENSSSCG00000008602	LAPTM4A	388.807	-0.268933	0.379224	-0.709165	0.478222	0.998184	556.968	457.927	260.402	425.099	405.89	337.417	314.239	352.515	0.829255	-0.270113
ENSSSCG00000016725	TNS3	175.257	-0.265158	0.635199	-0.417441	0.676356	0.998184	288.536	236.241	49.5604	191.446	127.478	200.13	149.595	159.068	0.830877	-0.267294
ENSSSCG00000017733	C17orf75	18.9877	-0.2499	0.540899	-0.462009	0.644075	0.998184	26.0155	23.5121	12.6001	20.7092	20.3965	15.469	15.9332	17.2662	0.833745	-0.262322
ENSSSCG00000008187	CRACDL	4.28716	-0.272279	1.60062	-0.170109	0.864925	NA	0	2.23925	11.7601	4.66644	1.01982	0.96681	9.73698	3.90787	0.837441	-0.255941
ENSSSCG00000007592	EIF2AK1	25.2299	-0.252814	0.444893	-0.568257	0.56986	0.998184	23.6505	25.7514	32.7602	27.3874	19.3767	24.1703	25.6702	23.0724	0.842446	-0.247343
ENSSSCG00000008691	TNIP2	53.5154	-0.246436	1.0598	-0.232531	0.816126	0.998184	14.1903	17.914	141.961	58.0218	13.2577	22.2366	111.533	49.009	0.844666	-0.243547
ENSSSCG00000001409	PRRC2A	277.034	-0.244433	0.422879	-0.57802	0.563251	0.998184	223.497	222.805	454.443	300.249	225.381	320.981	215.099	253.82	0.845367	-0.242349
ENSSSCG00000023978	RECQL5	38.9102	-0.24096	0.392649	-0.613679	0.539428	0.998184	44.9359	33.5888	47.8803	42.135	31.6146	33.8384	41.6035	35.6855	0.846932	-0.239682
ENSSSCG00000011540	SETD5	140.252	-0.236456	0.280799	-0.842081	0.399742	0.998184	160.823	160.106	134.401	151.777	148.894	116.017	121.27	128.727	0.848134	-0.237636
ENSSSCG00000008593	KLHL29	24.2816	-0.223481	0.759024	-0.294432	0.768428	0.998184	39.0233	31.3495	8.40006	26.2576	9.17842	33.8384	23.8999	22.3055	0.849489	-0.235333
ENSSSCG00000014022	HNRNPH1	272.395	-0.231097	0.255694	-0.903802	0.3661	0.998184	258.973	298.94	324.242	294.052	267.194	219.466	265.554	250.738	0.852701	-0.229889
ENSSSCG00000010879	KIF26B	4.09581	-0.263186	1.21837	-0.216015	0.828976	NA	1.18252	1.11963	10.9201	4.40741	3.05947	3.86724	4.4259	3.7842	0.858601	-0.21994
ENSSSCG00000008169	TBC1D8	23.5045	-0.203263	0.530816	-0.382926	0.701775	0.998184	30.7456	29.1103	15.9601	25.272	21.4163	15.469	28.3258	21.737	0.860123	-0.217386
ENSSSCG00000040352	DUS1L	22.986	-0.225795	0.674538	-0.33474	0.737821	0.998184	13.0078	15.6748	45.3603	24.6809	14.2775	21.2698	28.3258	21.291	0.862651	-0.213151
ENSSSCG00000021814	ZMYM2	108.316	-0.212636	0.261607	-0.812806	0.416329	0.998184	117.07	114.202	117.601	116.291	95.8635	102.482	102.681	100.342	0.862855	-0.21281
ENSSSCG00000014599	SYT9	0.347739	-0.116572	4.08047	-0.0285684	0.977209	NA	0	1.11963	0	0.373208	0	0.96681	0	0.32227	0.863512	-0.211711
ENSSSCG00000009177	DNAJB14	20.7495	-0.195518	0.486735	-0.401693	0.68791	0.998184	21.2854	26.871	18.4801	22.2122	19.3767	15.469	23.0147	19.2868	0.868297	-0.20374
ENSSSCG00000018044	ALDH3A1	5.55096	-0.232321	0.96899	-0.239756	0.810519	NA	2.36505	4.4785	10.9201	5.92121	6.11895	6.76767	2.65554	5.18072	0.874943	-0.192739
ENSSSCG00000000405	-	574.023	-0.192053	0.422299	-0.454781	0.649267	0.998184	720.157	635.947	480.483	612.196	822.998	370.288	414.264	535.85	0.875293	-0.192163
ENSSSCG00000038053	TK2	62.2078	-0.185688	0.355344	-0.522558	0.601282	0.998184	66.2213	59.3401	73.0805	66.214	46.9119	55.1082	72.5848	58.2016	0.878993	-0.186076
ENSSSCG00000017707	TAF15	78.1044	-0.181815	0.37242	-0.488198	0.62541	0.998184	100.514	77.2541	71.4005	83.0564	95.8635	58.9754	64.6181	73.1524	0.880756	-0.183186
ENSSSCG00000022668	ZFP1	5.76614	-0.207861	0.834809	-0.248993	0.803366	NA	3.54757	5.59813	9.24007	6.12859	5.09912	5.80086	5.31108	5.40369	0.881718	-0.18161
ENSSSCG00000026733	HIPK2	21.2945	-0.1661	0.457629	-0.362959	0.716636	0.998184	26.0155	22.3925	19.3201	22.5761	19.3767	20.303	20.3591	20.0129	0.886468	-0.17386
ENSSSCG00000016049	HIBCH	15.2827	-0.162575	0.552351	-0.294333	0.768503	0.998184	18.9204	17.914	11.7601	16.1982	17.337	11.6017	14.1629	14.3672	0.886966	-0.17305
ENSSSCG00000028777	-	2.08418	-0.14977	1.35495	-0.110536	0.911985	NA	3.54757	2.23925	0.840006	2.20894	3.05947	1.93362	0.88518	1.95942	0.887042	-0.172925
ENSSSCG00000002950	-	26.0802	-0.185296	0.782756	-0.236723	0.812872	0.998184	10.6427	13.4355	58.8004	27.6262	18.3568	35.772	19.474	24.5343	0.888079	-0.17124
ENSSSCG00000005987	TBC1D31	13.4161	-0.164878	0.578032	-0.28524	0.77546	0.998184	9.46019	17.914	15.1201	14.1648	12.2379	11.6017	14.1629	12.6675	0.894296	-0.161175
ENSSSCG00000038717	-	9.8275	-0.155059	0.630782	-0.245821	0.805821	0.998184	10.6427	11.1963	9.24007	10.3597	11.2181	8.70129	7.96662	9.29533	0.89726	-0.156401
ENSSSCG00000010204	BICC1	16.3905	-0.13927	0.652117	-0.213565	0.830886	0.998184	21.2854	21.2729	9.24007	17.2661	9.17842	23.2034	14.1629	15.5149	0.898576	-0.154288
ENSSSCG00000015432	ATXN7L1	20.7758	-0.14602	0.540541	-0.270136	0.787056	0.998184	22.4679	27.9906	15.1201	21.8596	25.4956	20.303	13.2777	19.6921	0.900847	-0.150647
ENSSSCG00000021443	SGK1	73.5772	-0.140594	0.403176	-0.348715	0.727303	0.998184	83.9591	59.3401	88.2006	77.1666	61.1895	53.1746	95.5994	69.9878	0.90697	-0.140873
ENSSSCG00000035045	DOCK1	65.7656	-0.138655	0.347894	-0.398556	0.69022	0.998184	76.864	66.0579	63.8405	68.9208	71.3877	68.6435	47.7997	62.6103	0.908439	-0.138539
ENSSSCG00000000145	-	689.382	-0.128169	0.407167	-0.314783	0.752926	0.998184	1024.07	536.3	599.764	720.043	683.282	834.357	458.523	658.721	0.914835	-0.128416
ENSSSCG00000034191	SOX6	12.3917	-0.117635	0.596924	-0.197069	0.843774	0.998184	13.0078	15.6748	10.0801	12.9209	15.2974	9.6681	10.6222	11.8625	0.918092	-0.123289
ENSSSCG00000032007	RTN4	520.268	-0.114573	0.578517	-0.198046	0.843009	0.998184	904.63	546.377	172.201	541.07	488.496	533.679	476.227	499.467	0.923111	-0.115424
ENSSSCG00000016846	WDR70	20.1968	-0.111461	0.482283	-0.231111	0.817228	0.998184	21.2854	22.3925	19.3201	20.9994	22.4361	14.5022	21.2443	19.3942	0.923562	-0.114719
ENSSSCG00000003775	MSH4	47.4983	-0.113874	0.452829	-0.251472	0.801449	0.998184	44.9359	52.6224	50.4004	49.3195	67.3084	29.0043	40.7183	45.677	0.926144	-0.110691
ENSSSCG00000005719	RAPGEF1	72.3345	-0.0987395	0.373745	-0.26419	0.791634	0.998184	95.7844	69.4168	59.6404	74.9472	56.0903	83.1457	69.9292	69.7218	0.930278	-0.104266
ENSSSCG00000021571	KIF27	2.92746	-0.100351	1.08135	-0.0928017	0.926061	NA	2.36505	3.35888	3.36002	3.02798	2.03965	2.90043	3.54072	2.82693	0.933603	-0.0991187
ENSSSCG00000016509	-	78.7884	-0.0933163	0.365004	-0.255659	0.798214	0.998184	82.7766	101.886	59.6404	81.4343	88.7247	71.544	68.1589	76.1425	0.935018	-0.0969345
ENSSSCG00000008359	RAB1A	157.008	-0.0882194	0.386783	-0.228085	0.81958	0.998184	201.029	189.217	95.7607	162.002	156.033	145.988	154.021	152.014	0.938348	-0.0918056
ENSSSCG00000031802	DHRS7B	41.6601	-0.0970868	0.414618	-0.23416	0.814861	0.998184	34.2932	39.1869	55.4404	42.9735	32.6344	40.606	47.7997	40.3467	0.938875	-0.0909955
ENSSSCG00000035148	ZNF268	9.1945	-0.108979	0.675763	-0.161268	0.871882	0.998184	8.27766	6.71775	13.4401	9.4785	9.17842	8.70129	8.8518	8.9105	0.940075	-0.0891521
ENSSSCG00000003712	OSBPL1A	73.3602	-0.0810169	0.464661	-0.174357	0.861585	0.998184	105.245	82.8523	38.6403	75.579	77.5067	68.6435	67.2737	71.1413	0.941283	-0.0872989
ENSSSCG00000003833	DAB1	4.00914	-0.0911743	1.09175	-0.0835124	0.933444	NA	1.18252	7.83738	3.36002	4.12664	6.11895	2.90043	2.65554	3.89164	0.943053	-0.0845899
ENSSSCG00000002427	EML5	1.28986	-0.0914244	1.56162	-0.0585446	0.953315	NA	1.18252	1.11963	1.68001	1.32739	1.01982	0.96681	1.77036	1.25233	0.943456	-0.0839721
ENSSSCG00000006235	TOX	1.28986	-0.0914244	1.56162	-0.0585446	0.953315	NA	1.18252	1.11963	1.68001	1.32739	1.01982	0.96681	1.77036	1.25233	0.943456	-0.0839721
ENSSSCG00000016317	AGAP1	33.0378	-0.0802714	0.475438	-0.168837	0.865925	0.998184	31.9281	41.4261	28.5602	33.9715	30.5947	44.4733	21.2443	32.1041	0.945031	-0.0815664
ENSSSCG00000003921	ZSWIM5	0.63527	-0.0896226	2.40767	-0.0372238	0.970307	NA	0	1.11963	0.840006	0.65321	0	0.96681	0.88518	0.61733	0.945071	-0.0815055
ENSSSCG00000007917	RBFOX1	0.63527	-0.0896226	2.40767	-0.0372238	0.970307	NA	0	1.11963	0.840006	0.65321	0	0.96681	0.88518	0.61733	0.945071	-0.0815055
ENSSSCG00000014258	ISOC1	104.41	-0.073087	0.425235	-0.171874	0.863536	0.998184	135.99	124.278	61.3204	107.196	118.3	102.482	84.0921	101.625	0.948023	-0.0770067
ENSSSCG00000022553	TNRC18	204.79	-0.0760873	0.413412	-0.184047	0.853977	0.998184	190.386	163.465	276.362	210.071	141.756	283.275	173.495	199.509	0.94972	-0.0744259
ENSSSCG00000016665	BMPER	33.5174	-0.067027	0.796684	-0.0841325	0.932951	0.998184	60.3087	36.9476	5.88004	34.3788	43.8525	32.8715	21.2443	32.6561	0.949891	-0.0741657
ENSSSCG00000026465	BABAM2	27.3942	-0.0609784	0.472845	-0.128961	0.897389	0.998184	31.9281	34.7084	17.6401	28.0922	25.4956	28.0375	26.5554	26.6962	0.950305	-0.0735373
ENSSSCG00000017139	RPTOR	75.6415	-0.0762731	0.332976	-0.229065	0.818818	0.998184	72.1339	67.1775	93.2407	77.5174	66.2886	85.0793	69.9292	73.7657	0.951602	-0.0715692
ENSSSCG00000011075	KIAA1217	36.6925	-0.0826223	0.459964	-0.179628	0.857445	0.998184	30.7456	29.1103	52.9204	37.5921	43.8525	29.0043	34.522	35.7929	0.95214	-0.0707541
ENSSSCG00000028097	GPBP1L1	69.5724	-0.0690966	0.299422	-0.230766	0.817496	0.998184	70.9514	73.8953	68.8805	71.2424	73.4274	64.7763	65.5033	67.9023	0.953117	-0.0692747
ENSSSCG00000002306	GALNT16	151.925	-0.0650728	0.777099	-0.0837381	0.933265	0.998184	201.029	241.839	23.5202	155.463	80.5661	187.561	177.036	148.388	0.954491	-0.0671963
ENSSSCG00000001052	PHACTR1	19.2358	-0.052416	0.521644	-0.100482	0.919961	0.998184	23.6505	16.7944	18.4801	19.6417	16.3172	14.5022	25.6702	18.8299	0.958669	-0.0608947
ENSSSCG00000025534	CSE1L	58.3101	-0.0658127	0.403859	-0.162959	0.87055	0.998184	44.9359	53.742	79.8006	59.4928	62.2093	45.4401	63.733	57.1274	0.960241	-0.0585315
ENSSSCG00000030605	POLR2M	35.1938	-0.044479	0.414139	-0.107401	0.914471	0.998184	41.3883	39.1869	26.8802	35.8185	39.7732	33.8384	30.0961	34.5692	0.965123	-0.0512156
ENSSSCG00000006037	OXR1	103.936	-0.0484347	0.747165	-0.0648246	0.948314	0.998184	100.514	184.738	31.9202	105.724	189.687	61.8759	54.8812	102.148	0.966175	-0.0496441
ENSSSCG00000005711	NUP214	94.135	-0.0529259	0.337137	-0.156986	0.875256	0.998184	87.5067	79.4934	120.121	95.707	83.6256	107.316	86.7476	92.5631	0.967151	-0.0481876
ENSSSCG00000004699	ELL3	11.7734	-0.0549159	1.63518	-0.033584	0.973209	0.998184	1.18252	1.11963	33.6002	11.9675	1.01982	0.96681	32.7517	11.5794	0.967576	-0.0475527
ENSSSCG00000015523	RALGPS2	25.2976	-0.0265022	0.488741	-0.0542254	0.956756	0.998184	29.5631	27.9906	19.3201	25.6246	17.337	31.9047	25.6702	24.9707	0.974479	-0.0372965
ENSSSCG00000027459	RNF13	57.8417	-0.0227363	0.533213	-0.0426402	0.965988	0.998184	80.4116	70.5364	24.3602	58.436	67.3084	52.2078	52.2256	57.2473	0.979657	-0.0296518
ENSSSCG00000024881	TCP11L2	24.7723	-0.0244698	0.517929	-0.0472455	0.962318	0.998184	27.198	30.2299	17.6401	25.0227	34.674	20.303	18.5888	24.5219	0.979989	-0.029163
ENSSSCG00000006346	ATF6	56.8545	-0.0248488	0.393111	-0.0632106	0.949599	0.998184	63.8563	63.8186	44.5203	57.3984	70.3679	56.075	42.4886	56.3105	0.981047	-0.0276064
ENSSSCG00000038493	PFDN1	37.2703	-0.0185786	0.422963	-0.0439248	0.964964	0.998184	42.5708	42.5458	27.7202	37.6123	42.8326	29.0043	38.9479	36.9283	0.981815	-0.0264768
ENSSSCG00000005423	ABCA1	38.4028	-0.0151458	0.716789	-0.0211301	0.983142	0.998184	50.8485	55.9813	9.24007	38.6899	45.8921	45.4401	23.0147	38.1156	0.985156	-0.0215761
ENSSSCG00000014892	USP35	5.67879	-0.0149491	0.813681	-0.0183722	0.985342	NA	5.91262	4.4785	6.72005	5.70372	4.0793	5.80086	7.08144	5.65387	0.991259	-0.0126657
ENSSSCG00000005996	MRPL13	14.0054	-0.0121798	0.588451	-0.0206982	0.983486	0.998184	11.8252	13.4355	16.8001	14.0203	17.337	8.70129	15.9332	13.9905	0.997877	-0.00306638
ENSSSCG00000004489	-	4383.22	-0.000355579	0.249645	-0.00142434	0.998864	0.999467	4656.78	4704.66	3790.11	4383.85	5081.79	4227.86	3838.14	4382.6	0.999714	-0.000412606
ENSSSCG00000000385	-	0.14753	0.8452	4.08047	0.207133	0.835906	NA	0	0	0	0	0	0	0.88518	0.29506	0	0
ENSSSCG00000002391	LRRC74A		0	0	0	0	0	0	0	0	0	0	0	0	0	0	0
ENSSSCG00000003442	C1orf158		0	0	0	0	0	0	0	0	0	0	0	0	0	0	0
ENSSSCG00000005257	TRPM3		0	0	0	0	0	0	0	0	0	0	0	0	0	0	0
ENSSSCG00000007001	-	0.169971	0.8452	4.08047	0.207133	0.835906	NA	0	0	0	0	1.01982	0	0	0.339941	0	0
ENSSSCG00000007010	ZMAT4		0	0	0	0	0	0	0	0	0	0	0	0	0	0	0
ENSSSCG00000007087	BANF2		0	0	0	0	0	0	0	0	0	0	0	0	0	0	0
ENSSSCG00000008209	TEX37		0	0	0	0	0	0	0	0	0	0	0	0	0	0	0
ENSSSCG00000008758	SLC34A2		0	0	0	0	0	0	0	0	0	0	0	0	0	0	0
ENSSSCG00000009527	FGF14	0.161135	0.8452	4.08047	0.207133	0.835906	NA	0	0	0	0	0	0.96681	0	0.32227	0	0
ENSSSCG00000009648	-		0	0	0	0	0	0	0	0	0	0	0	0	0	0	0
ENSSSCG00000009738	GALNT9		0	0	0	0	0	0	0	0	0	0	0	0	0	0	0
ENSSSCG00000010393	C10orf53		0	0	0	0	0	0	0	0	0	0	0	0	0	0	0
ENSSSCG00000010545	CPN1	0.14753	0.8452	4.08047	0.207133	0.835906	NA	0	0	0	0	0	0	0.88518	0.29506	0	0
ENSSSCG00000010617	SORCS3		0	0	0	0	0	0	0	0	0	0	0	0	0	0	0
ENSSSCG00000012367	ZC3H12B		0	0	0	0	0	0	0	0	0	0	0	0	0	0	0
ENSSSCG00000013296	SLC1A2		0	0	0	0	0	0	0	0	0	0	0	0	0	0	0
ENSSSCG00000014248	LMNB1		0	0	0	0	0	0	0	0	0	0	0	0	0	0	0
ENSSSCG00000015020	BTG4		0	0	0	0	0	0	0	0	0	0	0	0	0	0	0
ENSSSCG00000015291	LEMD1		0	0	0	0	0	0	0	0	0	0	0	0	0	0	0
ENSSSCG00000015741	CFAP221		0	0	0	0	0	0	0	0	0	0	0	0	0	0	0
ENSSSCG00000015746	DLGAP2		0	0	0	0	0	0	0	0	0	0	0	0	0	0	0
ENSSSCG00000016592	FSCN3		0	0	0	0	0	0	0	0	0	0	0	0	0	0	0
ENSSSCG00000017377	-		0	0	0	0	0	0	0	0	0	0	0	0	0	0	0
ENSSSCG00000022554	MATN1		0	0	0	0	0	0	0	0	0	0	0	0	0	0	0
ENSSSCG00000022671	GALNT13		0	0	0	0	0	0	0	0	0	0	0	0	0	0	0
ENSSSCG00000022701	-		0	0	0	0	0	0	0	0	0	0	0	0	0	0	0
ENSSSCG00000024320	TFF2		0	0	0	0	0	0	0	0	0	0	0	0	0	0	0
ENSSSCG00000024966	TRIM77		0	0	0	0	0	0	0	0	0	0	0	0	0	0	0
ENSSSCG00000025629	COLEC11		0	0	0	0	0	0	0	0	0	0	0	0	0	0	0
ENSSSCG00000028911	COLQ	0.169971	0.8452	4.08047	0.207133	0.835906	NA	0	0	0	0	1.01982	0	0	0.339941	0	0
ENSSSCG00000031075	-		0	0	0	0	0	0	0	0	0	0	0	0	0	0	0
ENSSSCG00000031436	-		0	0	0	0	0	0	0	0	0	0	0	0	0	0	0
ENSSSCG00000031931	-		0	0	0	0	0	0	0	0	0	0	0	0	0	0	0
ENSSSCG00000033204	-		0	0	0	0	0	0	0	0	0	0	0	0	0	0	0
ENSSSCG00000033643	-		0	0	0	0	0	0	0	0	0	0	0	0	0	0	0
ENSSSCG00000034198	-		0	0	0	0	0	0	0	0	0	0	0	0	0	0	0
ENSSSCG00000035020	STK32B		0	0	0	0	0	0	0	0	0	0	0	0	0	0	0
ENSSSCG00000035100	-		0	0	0	0	0	0	0	0	0	0	0	0	0	0	0
ENSSSCG00000036632	-		0	0	0	0	0	0	0	0	0	0	0	0	0	0	0
ENSSSCG00000037023	-	0.331106	1.78982	4.03363	0.443726	0.657241	NA	0	0	0	0	1.01982	0.96681	0	0.662212	0	0
ENSSSCG00000038152	CNTN6		0	0	0	0	0	0	0	0	0	0	0	0	0	0	0
ENSSSCG00000038257	SGCZ		0	0	0	0	0	0	0	0	0	0	0	0	0	0	0
ENSSSCG00000038734	-		0	0	0	0	0	0	0	0	0	0	0	0	0	0	0
ENSSSCG00000038892	-		0	0	0	0	0	0	0	0	0	0	0	0	0	0	0
ENSSSCG00000039614	-		0	0	0	0	0	0	0	0	0	0	0	0	0	0	0
ENSSSCG00000040109	-		0	0	0	0	0	0	0	0	0	0	0	0	0	0	0
ENSSSCG00000040263	-		0	0	0	0	0	0	0	0	0	0	0	0	0	0	0
ENSSSCG00000040403	NANOG		0	0	0	0	0	0	0	0	0	0	0	0	0	0	0
ENSSSCG00000040453	SYN3	0.308665	1.70156	4.04149	0.421022	0.673739	NA	0	0	0	0	0	0.96681	0.88518	0.61733	0	0
ENSSSCG00000040615	-		0	0	0	0	0	0	0	0	0	0	0	0	0	0	0
ENSSSCG00000041021	-		0	0	0	0	0	0	0	0	0	0	0	0	0	0	0
ENSSSCG00000041691	-		0	0	0	0	0	0	0	0	0	0	0	0	0	0	0
ENSSSCG00000042118	TAFA1		0	0	0	0	0	0	0	0	0	0	0	0	0	0	0
ENSSSCG00000042263	-		0	0	0	0	0	0	0	0	0	0	0	0	0	0	0
ENSSSCG00000042304	TAFA3		0	0	0	0	0	0	0	0	0	0	0	0	0	0	0
ENSSSCG00000043601	-		0	0	0	0	0	0	0	0	0	0	0	0	0	0	0
ENSSSCG00000043733	-		0	0	0	0	0	0	0	0	0	0	0	0	0	0	0
ENSSSCG00000046886	-		0	0	0	0	0	0	0	0	0	0	0	0	0	0	0
ENSSSCG00000048276	-		0	0	0	0	0	0	0	0	0	0	0	0	0	0	0
ENSSSCG00000016426	-	18.7294	-0.00593048	0.589048	-0.0100679	0.991967	0.998845	14.1903	16.7944	25.2002	18.7283	15.2974	12.5685	28.3258	18.7306	1.00012	0.000175334
ENSSSCG00000017419	DNAJC7	77.5117	0.00764981	0.308286	0.024814	0.980203	0.998184	83.9591	78.3738	69.7205	77.3511	88.7247	73.4776	70.8144	77.6722	1.00415	0.00597659
ENSSSCG00000021363	CHD3	297.544	0.0105223	0.282938	0.0371895	0.970334	0.998184	320.464	248.557	320.042	296.354	321.245	330.649	244.31	298.735	1.00803	0.011541
ENSSSCG00000007727	AUTS2	19.7565	-0.00122271	0.563432	-0.0021701	0.998269	0.999467	14.1903	14.5551	30.2402	19.6619	16.3172	19.3362	23.8999	19.8511	1.00962	0.0138172
ENSSSCG00000013052	-	219.978	0.0170059	0.426709	0.0398537	0.96821	0.998184	296.813	239.6	120.121	218.845	262.095	212.698	188.543	221.112	1.01036	0.0148713
ENSSSCG00000024663	-	4.73357	-0.0218772	0.950475	-0.0230171	0.981637	NA	2.36505	3.35888	8.40006	4.70799	5.09912	3.86724	5.31108	4.75915	1.01087	0.0155909
ENSSSCG00000022112	DOCK9	166.725	0.0211908	0.339482	0.0624208	0.950228	0.998184	210.489	172.422	114.241	165.717	166.231	164.358	172.61	167.733	1.01216	0.0174421
ENSSSCG00000033082	HGS	144.314	0.0147846	0.420086	0.0351942	0.971925	0.998184	113.522	100.766	215.882	143.39	118.3	163.391	154.021	145.237	1.01288	0.0184675
ENSSSCG00000008749	SLIT2	31.5383	0.0341923	0.711532	0.0480545	0.961673	0.998184	48.4835	36.9476	8.40006	31.277	22.4361	46.4069	26.5554	31.7995	1.0167	0.0238988
ENSSSCG00000009369	COG6	29.3451	0.0141789	0.446562	0.0317511	0.974671	0.998184	24.833	24.6318	37.8003	29.0883	33.6542	24.1703	30.9813	29.6019	1.01766	0.0252501
ENSSSCG00000013726	-	102.656	0.0238103	0.327213	0.072767	0.941992	0.998184	95.7844	80.613	128.521	101.639	98.923	111.183	100.911	103.672	1.02	0.0285692
ENSSSCG00000003699	GREB1L	1.60295	-0.0161253	1.57343	-0.0102485	0.991823	NA	0	2.23925	2.52002	1.58642	2.03965	1.93362	0.88518	1.61948	1.02084	0.0297562
ENSSSCG00000009320	FLT1	76.0045	0.0374234	0.539262	0.0693976	0.944673	0.998184	108.792	87.3308	29.4002	75.1744	74.4472	87.0129	69.044	76.8347	1.02209	0.0315175
ENSSSCG00000004065	TIAM2	16.0507	0.0132652	0.630749	0.0210308	0.983221	0.998184	9.46019	11.1963	26.8802	15.8455	16.3172	17.4026	15.0481	16.2559	1.0259	0.0368904
ENSSSCG00000008222	CHMP3	103.617	0.0428737	0.348286	0.123099	0.902029	0.998184	126.53	106.364	73.9205	102.272	107.082	91.847	115.959	104.962	1.02631	0.0374663
ENSSSCG00000012062	TTC3	124.996	0.0418807	0.306662	0.13657	0.891371	0.998184	146.633	120.92	102.481	123.344	111.161	143.088	125.696	126.648	1.02678	0.0381337
ENSSSCG00000010735	LHPP	74.6538	0.0439275	0.522965	0.0839969	0.933059	0.998184	82.7766	98.527	39.4803	73.5946	113.201	59.9422	53.996	75.7129	1.02878	0.0409387
ENSSSCG00000039080	TRIB2	16.5565	0.0283816	0.564114	0.0503119	0.959874	0.998184	14.1903	11.1963	23.5202	16.3022	14.2775	19.3362	16.8184	16.8107	1.03119	0.0443122
ENSSSCG00000023001	CCDC149	35.8593	0.0450232	0.441019	0.102089	0.918686	0.998184	37.8407	26.871	41.1603	35.2907	26.5154	36.7388	46.0294	36.4279	1.03222	0.0457552
ENSSSCG00000014898	DDIAS	1.23277	-0.00870109	1.74657	-0.0049818	0.996025	NA	0	1.11963	2.52002	1.21321	1.01982	0.96681	1.77036	1.25233	1.03224	0.0457822
ENSSSCG00000008582	-	2.49847	0.00384352	1.26364	0.00304162	0.997573	NA	1.18252	1.11963	5.04004	2.44739	3.05947	1.93362	2.65554	2.54954	1.04174	0.0589928
ENSSSCG00000038919	RP9	15.5736	0.0791453	0.551338	0.143551	0.885855	0.998184	16.5553	19.0336	10.0801	15.223	17.337	14.5022	15.9332	15.9241	1.04606	0.0649617
ENSSSCG00000012619	SEPTIN6	15.5757	0.0912627	0.628936	0.145107	0.884627	0.998184	18.9204	19.0336	7.56005	15.1714	14.2775	21.2698	12.3925	15.98	1.0533	0.0749145
ENSSSCG00000023548	GSTCD	5.23932	0.045181	0.882651	0.0511878	0.959176	NA	3.54757	3.35888	8.40006	5.10217	5.09912	4.83405	6.19626	5.37648	1.05376	0.075551
ENSSSCG00000021439	CCDC66	7.16108	0.0438876	0.813798	0.0539293	0.956992	0.998184	3.54757	5.59813	11.7601	6.96859	9.17842	5.80086	7.08144	7.35357	1.05525	0.0775782
ENSSSCG00000008513	BIRC6	57.223	0.0853154	0.341957	0.249492	0.802981	0.998184	62.6737	57.1009	47.0403	55.605	66.2886	58.0086	52.2256	58.8409	1.0582	0.0816062
ENSSSCG00000027551	NUDT15	5.25293	0.0499379	0.878633	0.0568359	0.954676	NA	3.54757	3.35888	8.40006	5.10217	5.09912	5.80086	5.31108	5.40369	1.0591	0.0828339
ENSSSCG00000008600	PUM2	89.4723	0.0817526	0.295944	0.276243	0.782361	0.998184	73.3164	94.0485	93.2407	86.8685	86.6851	95.7142	93.8291	92.0761	1.05995	0.0839934
ENSSSCG00000032910	C12orf73	17.1573	0.07034	0.524781	0.134037	0.893373	0.998184	13.0078	16.7944	20.1601	16.6541	21.4163	17.4026	14.1629	17.6606	1.06044	0.0846571
ENSSSCG00000014794	NUP98	68.742	0.0800781	0.411298	0.194696	0.845631	0.998184	53.2135	49.2635	97.4407	66.6392	71.3877	67.6767	73.4699	70.8448	1.06311	0.0882897
ENSSSCG00000016291	GIGYF2	37.57	0.0837914	0.452653	0.185112	0.853141	0.998184	36.6582	31.3495	41.1603	36.3893	46.9119	45.4401	23.8999	38.7506	1.06489	0.0907037
ENSSSCG00000027741	-	7.76549	0.0936321	0.718542	0.130308	0.896322	0.998184	7.09514	7.83738	7.56005	7.49752	11.2181	5.80086	7.08144	8.03346	1.07148	0.0996069
ENSSSCG00000003728	-	36.5033	0.0992077	0.39332	0.252231	0.800862	0.998184	34.2932	36.9476	34.4402	35.227	46.9119	31.9047	34.522	37.7796	1.07246	0.100924
ENSSSCG00000007872	XYLT1	4.54123	0.104761	0.944081	0.110967	0.911643	NA	4.73009	3.35888	5.04004	4.37633	2.03965	6.76767	5.31108	4.70613	1.07536	0.104819
ENSSSCG00000021702	XRRA1	4.30604	0.0699822	0.951087	0.0735813	0.941344	NA	2.36505	3.35888	6.72005	4.14799	5.09912	3.86724	4.4259	4.46409	1.07621	0.105953
ENSSSCG00000024667	MICU2	64.3461	0.10994	0.324012	0.339309	0.734377	0.998184	68.5863	62.699	54.6004	61.9619	75.467	61.8759	62.8478	66.7302	1.07696	0.106958
ENSSSCG00000011760	TBL1XR1	25.6542	0.0981672	0.499909	0.19637	0.844321	0.998184	18.9204	22.3925	32.7602	24.691	19.3767	34.8052	25.6702	26.6174	1.07802	0.10838
ENSSSCG00000023593	AFF1	68.5175	0.10463	0.372409	0.280954	0.778746	0.998184	59.1262	63.8186	74.7605	65.9018	93.8238	63.8095	55.7663	71.1332	1.07938	0.110206
ENSSSCG00000011106	CREM	21.3951	0.131716	0.48707	0.270426	0.786833	0.998184	26.0155	21.2729	14.2801	20.5228	22.4361	22.2366	22.1295	22.2674	1.08501	0.117705
ENSSSCG00000005356	DCAF10	3.67222	0.137865	0.977344	0.14106	0.887822	NA	3.54757	4.4785	2.52002	3.51536	4.0793	3.86724	3.54072	3.82909	1.08924	0.123327
ENSSSCG00000008300	STAMBP	14.9509	0.123543	0.532772	0.231887	0.816626	0.998184	11.8252	16.7944	14.2801	14.2999	17.337	13.5353	15.9332	15.6019	1.09105	0.125713
ENSSSCG00000020823	BSCL2	17.4846	0.115626	0.523091	0.221044	0.825058	0.998184	16.5553	13.4355	20.1601	16.717	18.3568	22.2366	14.1629	18.2521	1.09183	0.126749
ENSSSCG00000025316	-	33.0087	0.123226	0.389413	0.316441	0.751668	0.998184	27.198	34.7084	32.7602	31.5555	36.7137	34.8052	31.8665	34.4618	1.0921	0.127103
ENSSSCG00000016907	DHX29	35.8229	0.13289	0.435975	0.304811	0.76051	0.998184	28.3806	44.785	29.4002	34.1886	46.9119	30.9379	34.522	37.4573	1.09561	0.131732
ENSSSCG00000027509	VPS54	35.9041	0.135051	0.403988	0.334294	0.738158	0.998184	36.6582	35.828	30.2402	34.2421	46.9119	34.8052	30.9813	37.5661	1.09707	0.133659
ENSSSCG00000000588	PLEKHA5	31.7013	0.126521	0.399359	0.316809	0.751388	0.998184	26.0155	30.2299	34.4402	30.2285	33.6542	35.772	30.0961	33.1741	1.09744	0.134146
ENSSSCG00000009060	MAML3	7.30356	0.145282	0.726371	0.20001	0.841472	0.998184	8.27766	6.71775	5.88004	6.95848	9.17842	5.80086	7.96662	7.64863	1.09918	0.136429
ENSSSCG00000028856	ABCF3	72.9073	0.134041	0.295935	0.45294	0.650592	0.998184	65.0388	69.4168	73.9205	69.4587	79.5463	72.5108	77.0107	76.3559	1.0993	0.136585
ENSSSCG00000002930	ZNF260	10.2968	0.115541	0.831705	0.13892	0.889513	0.998184	3.54757	5.59813	20.1601	9.76861	11.2181	10.6349	10.6222	10.825	1.10815	0.148148
ENSSSCG00000037746	NHLRC3	12.0853	0.169866	0.577493	0.294143	0.768648	0.998184	10.6427	13.4355	10.0801	11.3861	14.2775	12.5685	11.5073	12.7845	1.12281	0.16712
ENSSSCG00000004033	AGPAT4	5.61875	0.160266	0.838398	0.191158	0.848402	NA	3.54757	5.59813	6.72005	5.28858	4.0793	5.80086	7.96662	5.94893	1.12486	0.169749
ENSSSCG00000039719	ZDHHC4	29.388	0.183151	0.478095	0.383084	0.701657	0.998184	30.7456	33.5888	18.4801	27.6048	35.6939	34.8052	23.0147	31.1712	1.1292	0.175295
ENSSSCG00000011843	PAK2	47.0237	0.181062	0.375189	0.482589	0.629388	0.998184	41.3883	51.5028	39.4803	44.1238	42.8326	60.909	46.0294	49.9237	1.13145	0.178168
ENSSSCG00000002366	NPC2	166.162	0.186395	0.439434	0.424172	0.67144	0.998184	201.029	176.901	89.0406	155.657	126.458	187.561	215.984	176.668	1.13498	0.182671
ENSSSCG00000030154	RSBN1	20.0157	0.182373	0.473163	0.385434	0.699916	0.998184	15.3728	22.3925	18.4801	18.7485	21.4163	20.303	22.1295	21.2829	1.13518	0.182924
ENSSSCG00000017430	EIF1	355.501	0.187513	0.280948	0.66743	0.504498	0.998184	357.122	386.271	254.522	332.638	384.474	387.691	362.924	378.363	1.13746	0.185817
ENSSSCG00000016448	KCNH2	2.11754	0.159304	1.26475	0.125957	0.899766	NA	1.18252	2.23925	2.52002	1.9806	3.05947	1.93362	1.77036	2.25448	1.13829	0.186862
ENSSSCG00000006059	NCALD	12.228	0.195296	0.648568	0.301119	0.763324	0.998184	13.0078	11.1963	10.0801	11.428	8.1586	20.303	10.6222	13.0279	1.14	0.189031
ENSSSCG00000016147	PIKFYVE	22.2397	0.193553	0.472109	0.409976	0.681824	0.998184	18.9204	25.7514	17.6401	20.7706	26.5154	25.1371	19.474	23.7088	1.14146	0.190879
ENSSSCG00000036520	EFNA5	30.3971	0.207331	0.491644	0.42171	0.673237	0.998184	36.6582	32.4691	15.9601	28.3625	29.5749	36.7388	30.9813	32.4317	1.14347	0.193419
ENSSSCG00000009946	SART3	36.3737	0.188071	0.408212	0.460718	0.645001	0.998184	33.1107	29.1103	39.4803	33.9004	44.8723	41.5728	30.0961	38.8471	1.14592	0.196504
ENSSSCG00000038008	RBM14	21.9294	0.188602	0.825255	0.228538	0.819228	0.998184	5.91262	8.957	46.2003	20.3566	22.4361	24.1703	23.8999	23.5021	1.15452	0.207289
ENSSSCG00000001080	CDKAL1	10.6437	0.209308	0.600162	0.348752	0.727275	0.998184	9.46019	10.0766	10.0801	9.87229	11.2181	10.6349	12.3925	11.4152	1.15628	0.209495
ENSSSCG00000040013	MTUS1	56.4384	0.213099	0.410822	0.518713	0.603961	0.998184	59.1262	38.0673	59.6404	52.2779	45.8921	58.0086	77.8958	60.5989	1.15917	0.213088
ENSSSCG00000017475	RARA	73.6467	0.223395	0.429996	0.519529	0.603392	0.998184	72.1339	63.8186	68.0405	67.9977	44.8723	105.382	87.6328	79.2958	1.16615	0.221759
ENSSSCG00000006496	LMNA	636.329	0.224108	0.333375	0.67224	0.501431	0.998184	572.341	487.037	701.405	586.928	485.436	803.419	768.336	685.731	1.16834	0.224459
ENSSSCG00000004032	PRKN	5.02331	0.262882	1.18888	0.221117	0.825001	NA	8.27766	5.59813	0	4.62526	6.11895	4.83405	5.31108	5.42136	1.17212	0.229119
ENSSSCG00000032644	HLX	33.2449	0.244752	0.534263	0.458112	0.646872	0.998184	40.2058	31.3495	20.1601	30.5718	20.3965	38.6724	48.6849	35.9179	1.17487	0.232502
ENSSSCG00000030326	TCP11L1	20.6548	0.212792	0.54718	0.388888	0.697359	0.998184	13.0078	14.5551	29.4002	18.9877	22.4361	24.1703	20.3591	22.3218	1.1756	0.233391
ENSSSCG00000006752	CSDE1	408.983	0.236577	0.263139	0.899054	0.368624	0.998184	417.431	403.065	306.602	375.699	485.436	435.065	406.298	442.266	1.17718	0.235337
ENSSSCG00000006063	PABPC1	913.503	0.238208	0.234867	1.01423	0.310475	0.998184	882.162	881.145	751.805	838.371	975.972	1111.83	878.099	988.634	1.17923	0.237848
ENSSSCG00000024722	PIBF1	4.73054	0.194555	0.980112	0.198503	0.842652	NA	2.36505	2.23925	8.40006	4.33479	6.11895	4.83405	4.4259	5.1263	1.1826	0.241957
ENSSSCG00000002404	SPTLC2	30.1201	0.230666	0.431514	0.53455	0.592961	0.998184	24.833	23.5121	34.4402	27.5951	38.7533	29.9711	29.2109	32.6451	1.183	0.242455
ENSSSCG00000007606	TRRAP	136.273	0.237394	0.351235	0.675885	0.499114	0.998184	99.332	106.364	168.841	124.846	167.251	132.453	143.399	147.701	1.18307	0.242533
ENSSSCG00000027429	YARS2	5.59287	0.216985	0.861921	0.251746	0.801237	NA	3.54757	3.35888	8.40006	5.10217	7.13877	5.80086	5.31108	6.08357	1.19235	0.253808
ENSSSCG00000028740	CTDSPL	28.297	0.276803	0.51125	0.541423	0.588216	0.998184	30.7456	31.3495	15.1201	25.7384	22.4361	33.8384	36.2924	30.8556	1.19882	0.261611
ENSSSCG00000010535	HPSE2	4.25489	0.286188	1.03936	0.275351	0.783046	NA	2.36505	6.71775	2.52002	3.8676	3.05947	2.90043	7.96662	4.64217	1.20027	0.26336
ENSSSCG00000029030	SMCHD1	30.5558	0.279009	0.451741	0.61763	0.536819	0.998184	34.2932	26.871	21.8402	27.6681	39.7732	35.772	24.785	33.4434	1.20873	0.273497
ENSSSCG00000003680	RALBP1	92.7427	0.271422	0.362185	0.749402	0.453615	0.998184	70.9514	67.1775	113.401	83.8432	91.7842	113.117	100.025	101.642	1.21229	0.277732
ENSSSCG00000027115	-	47.4525	0.279148	0.48028	0.581218	0.561093	0.998184	34.2932	32.4691	61.3204	42.6942	72.4075	43.5065	40.7183	52.2108	1.2229	0.290306
ENSSSCG00000015667	MBD5	9.89635	0.310637	0.674619	0.460463	0.645184	0.998184	11.8252	8.957	5.88004	8.88742	14.2775	8.70129	9.73698	10.9053	1.22705	0.295188
ENSSSCG00000016611	CADPS2	8.97607	0.307349	0.678501	0.452982	0.650561	0.998184	7.09514	11.1963	5.88004	8.05714	10.1982	10.6349	8.8518	9.89499	1.2281	0.296429
ENSSSCG00000009714	NEK1	23.957	0.297666	0.432457	0.688312	0.491256	0.998184	22.4679	20.1533	21.8402	21.4871	28.5551	24.1703	26.5554	26.4269	1.2299	0.298536
ENSSSCG00000017705	CCL5	10.3866	0.326881	0.832516	0.392642	0.694584	0.998184	14.1903	11.1963	2.52002	9.30218	8.1586	17.4026	8.8518	11.471	1.23315	0.302349
ENSSSCG00000017165	-	69.0519	0.297215	0.534211	0.556363	0.577962	0.998184	37.8407	42.5458	105.001	61.7957	57.1102	74.4444	97.3698	76.3081	1.23484	0.304329
ENSSSCG00000016708	SKAP2	21.9369	0.289723	0.506069	0.572498	0.566985	0.998184	16.5553	14.5551	27.7202	19.6102	24.4758	27.0707	21.2443	24.2636	1.23729	0.307188
ENSSSCG00000035969	THRA	47.8207	0.300882	0.396679	0.758502	0.44815	0.998184	42.5708	33.5888	52.0804	42.7467	46.9119	65.7431	46.0294	52.8948	1.2374	0.307314
ENSSSCG00000016639	FOXP2	2.03463	0.342925	1.31229	0.261318	0.793848	NA	2.36505	2.23925	0.840006	1.81477	3.05947	1.93362	1.77036	2.25448	1.2423	0.313013
ENSSSCG00000007451	SLC2A10	12.3756	0.341124	0.601017	0.567577	0.570322	0.998184	14.1903	11.1963	7.56005	10.9822	15.2974	14.5022	11.5073	13.769	1.25375	0.326253
ENSSSCG00000009492	GPR180	41.5351	0.340352	0.702213	0.484685	0.6279	0.998184	46.1184	51.5028	12.6001	36.7404	78.5265	24.1703	36.2924	46.3297	1.261	0.33457
ENSSSCG00000017116	LPCAT1	67.3748	0.357243	0.539844	0.661753	0.508129	0.998184	82.7766	57.1009	37.8003	59.2259	36.7137	88.9465	100.911	75.5236	1.27518	0.350698
ENSSSCG00000024399	EVC2	19.7399	0.363573	0.522654	0.695629	0.486661	0.998184	20.1029	12.3159	19.3201	17.2463	17.337	29.0043	20.3591	22.2335	1.28917	0.366447
ENSSSCG00000010433	SGMS1	30.9809	0.358201	0.439262	0.81546	0.414809	0.998184	20.1029	29.1103	31.9202	27.0445	42.8326	30.9379	30.9813	34.9173	1.29111	0.368608
ENSSSCG00000011501	SUCLG2	84.5732	0.377836	0.474247	0.796706	0.425622	0.998184	88.6892	92.9289	39.4803	73.6995	127.478	78.3116	80.5514	95.447	1.29508	0.373046
ENSSSCG00000010455	SLC16A12	4.03461	0.378583	0.991657	0.381768	0.702633	NA	3.54757	4.4785	2.52002	3.51536	7.13877	3.86724	2.65554	4.55385	1.29541	0.373413
ENSSSCG00000004472	IRAK1BP1	5.32343	0.35979	0.836336	0.430197	0.667052	NA	3.54757	4.4785	5.88004	4.63537	6.11895	4.83405	7.08144	6.01148	1.29687	0.375035
ENSSSCG00000004289	CEP162	10.2268	0.360357	0.660085	0.545925	0.585118	0.998184	5.91262	8.957	11.7601	8.87657	14.2775	11.6017	8.8518	11.577	1.30422	0.38319
ENSSSCG00000026842	CDH18	3.42992	0.417752	1.15336	0.362203	0.7172	NA	4.73009	3.35888	0.840006	2.97632	4.0793	5.80086	1.77036	3.88351	1.3048	0.383828
ENSSSCG00000022801	S100PBP	11.433	0.362282	0.670762	0.540105	0.589125	0.998184	5.91262	7.83738	15.9601	9.90337	12.2379	11.6017	15.0481	12.9626	1.3089	0.388359
ENSSSCG00000009684	PRSS55	14.2828	0.41511	0.55324	0.750325	0.453059	0.998184	15.3728	12.3159	9.24007	12.3096	16.3172	17.4026	15.0481	16.2559	1.32059	0.401186
ENSSSCG00000004502	RNF165	1.67805	0.44289	1.41704	0.312545	0.754626	NA	2.36505	1.11963	0.840006	1.44156	2.03965	1.93362	1.77036	1.91454	1.32811	0.40937
ENSSSCG00000010739	CTBP2	44.2775	0.39834	0.479712	0.830372	0.406328	0.998184	27.198	27.9906	58.8004	37.9964	53.0309	57.0418	41.6035	50.5587	1.33062	0.412099
ENSSSCG00000003828	FGGY	14.2761	0.438075	0.603884	0.725429	0.468189	0.998184	15.3728	14.5551	6.72005	12.216	19.3767	15.469	14.1629	16.3362	1.33728	0.419299
ENSSSCG00000022155	RBPJ	36.3895	0.438215	0.483416	0.906498	0.364672	0.998184	28.3806	43.6654	21.0001	31.0154	30.5947	52.2078	42.4886	41.7637	1.34655	0.429267
ENSSSCG00000002410	CEP128	2.79803	0.430072	1.13682	0.378313	0.705198	NA	2.36505	2.23925	2.52002	2.37477	3.05947	4.83405	1.77036	3.22129	1.35647	0.439852
ENSSSCG00000011236	CLASP2	46.4981	0.4506	0.34962	1.28883	0.197457	0.998184	41.3883	36.9476	39.4803	39.2721	59.1498	55.1082	46.9145	53.7242	1.368	0.452068
ENSSSCG00000012691	ZNF449	11.1149	0.463808	0.656101	0.706915	0.479619	0.998184	11.8252	7.83738	8.40006	9.35422	13.2577	17.4026	7.96662	12.8756	1.37645	0.460955
ENSSSCG00000005386	STX17	18.9986	0.449046	0.495833	0.90564	0.365127	0.998184	11.8252	16.7944	19.3201	15.9799	23.456	22.2366	20.3591	22.0172	1.37781	0.462374
ENSSSCG00000016672	ADCYAP1R1	56.9312	0.47223	1.00231	0.471143	0.637539	0.998184	88.6892	50.3831	4.20003	47.7575	137.676	36.7388	23.8999	66.105	1.38418	0.469033
ENSSSCG00000007080	KIF16B	43.3239	0.478049	0.381759	1.25223	0.210487	0.998184	43.7534	27.9906	36.9603	36.2347	44.8723	54.1414	52.2256	50.4131	1.39129	0.476424
ENSSSCG00000008186	TSGA10	9.52357	0.501093	0.646806	0.774719	0.438506	0.998184	8.27766	7.83738	7.56005	7.8917	13.2577	8.70129	11.5073	11.1555	1.41357	0.499341
ENSSSCG00000035069	CHSY3	3.20588	0.491353	1.06056	0.463297	0.643152	NA	2.36505	2.23925	3.36002	2.65477	3.05947	2.90043	5.31108	3.75699	1.41518	0.50099
ENSSSCG00000007147	HSPA12B	83.8269	0.511269	0.56237	0.909133	0.36328	0.998184	113.522	64.9383	29.4002	69.2869	95.8635	126.652	72.5848	98.3668	1.4197	0.505589
ENSSSCG00000033958	RYR3	0.815724	0.497299	2.0153	0.246762	0.805093	NA	1.18252	0	0.840006	0.674176	1.01982	0.96681	0.88518	0.957272	1.41991	0.505802
ENSSSCG00000011022	SVIL	65.4445	0.500389	0.394978	1.26688	0.205199	0.998184	54.3961	41.4261	66.3605	54.0609	87.7049	87.0129	55.7663	76.8281	1.42114	0.507048
ENSSSCG00000022318	ERG	54.1261	0.517447	0.541106	0.956276	0.338933	0.998184	68.5863	47.0243	18.4801	44.6969	70.3679	61.8759	58.4219	63.5552	1.42192	0.507835
ENSSSCG00000010690	SEC23IP	18.2609	0.50737	0.522829	0.970432	0.331831	0.998184	14.1903	12.3159	18.4801	14.9954	24.4758	24.1703	15.9332	21.5264	1.43553	0.521586
ENSSSCG00000009464	COMMD6	93.6112	0.544671	0.282608	1.9273	0.053942	0.768853	85.1417	73.8953	69.7205	76.2525	111.161	110.216	111.533	110.97	1.4553	0.541313
ENSSSCG00000009856	NOS1	0.829329	0.528825	2.26265	0.233719	0.815203	NA	1.18252	0	0.840006	0.674176	1.01982	1.93362	0	0.984482	1.46027	0.546238
ENSSSCG00000005607	RALGPS1	5.59909	0.523609	0.833671	0.628077	0.529954	NA	3.54757	3.35888	6.72005	4.54216	6.11895	6.76767	7.08144	6.65602	1.46539	0.55128
ENSSSCG00000039909	ICAM2	22.3349	0.551365	0.468333	1.17729	0.239079	0.998184	21.2854	14.5551	18.4801	18.1069	28.5551	29.0043	22.1295	26.563	1.46701	0.552877
ENSSSCG00000009225	HSD17B11	17.0905	0.565969	0.579763	0.976208	0.328962	0.998184	17.7378	14.5551	9.24007	13.8443	25.4956	22.2366	13.2777	20.3366	1.46895	0.554785
ENSSSCG00000016543	EXOC4	20.7549	0.559242	0.461755	1.21112	0.225849	0.998184	16.5553	17.914	15.9601	16.8098	23.456	23.2034	27.4406	24.7	1.46938	0.555207
ENSSSCG00000008346	APLF	26.4894	0.568874	0.451359	1.26036	0.20754	0.998184	24.833	23.5121	15.9601	21.4351	35.6939	27.0707	31.8665	31.5437	1.47159	0.557377
ENSSSCG00000012988	EHBP1L1	80.5584	0.560701	0.422426	1.32733	0.184398	0.998184	69.7689	40.3065	84.8406	64.972	82.6058	120.851	84.9773	96.1448	1.47979	0.565391
ENSSSCG00000031378	KBTBD6	3.96764	0.534536	1.00283	0.533027	0.594015	NA	1.18252	3.35888	5.04004	3.19381	4.0793	4.83405	5.31108	4.74148	1.48458	0.570057
ENSSSCG00000034776	TAFA5	2.69434	0.513374	1.23943	0.4142	0.678727	NA	1.18252	1.11963	4.20003	2.16739	3.05947	4.83405	1.77036	3.22129	1.48625	0.57168
ENSSSCG00000004625	LEO1	9.56191	0.560187	0.866319	0.646629	0.517872	0.998184	2.36505	4.4785	15.9601	7.60122	14.2775	9.6681	10.6222	11.5226	1.51589	0.600164
ENSSSCG00000033732	ANKRD10	120.723	0.598351	0.291673	2.05144	0.0402237	0.675627	91.0543	91.8093	105.001	95.9548	126.458	170.159	139.858	145.492	1.51625	0.600511
ENSSSCG00000003816	ATG4C	8.54342	0.623729	0.729671	0.854809	0.392657	0.998184	8.27766	7.83738	4.20003	6.77169	14.2775	8.70129	7.96662	10.3152	1.52328	0.607177
ENSSSCG00000037376	-	85.0722	0.614593	0.597652	1.02835	0.303787	0.998184	104.062	62.699	35.2803	67.3471	66.2886	173.059	69.044	102.797	1.52638	0.610114
ENSSSCG00000029227	LDB2	28.3879	0.630503	0.484183	1.3022	0.192848	0.998184	33.1107	19.0336	15.1201	22.4215	33.6542	35.772	33.6368	34.3543	1.53221	0.615612
ENSSSCG00000011432	GLYCTK	5.5322	0.610367	0.856707	0.712457	0.476182	NA	3.54757	4.4785	5.04004	4.35537	9.17842	3.86724	7.08144	6.70903	1.54041	0.62331
ENSSSCG00000023557	CCRL2	1.33343	0.634532	1.57398	0.40314	0.686845	NA	1.18252	1.11963	0.840006	1.04738	2.03965	1.93362	0.88518	1.61948	1.54622	0.628742
ENSSSCG00000007033	AP3M2	11.5691	0.632613	0.609138	1.03854	0.29902	0.998184	8.27766	7.83738	10.9201	9.01171	17.337	13.5353	11.5073	14.1266	1.56758	0.648539
ENSSSCG00000009240	-	1.85279	0.677462	1.43827	0.471027	0.637621	NA	2.36505	1.11963	0.840006	1.44156	2.03965	3.86724	0.88518	2.26402	1.57054	0.651259
ENSSSCG00000029268	TOPAZ1	2.86671	0.714386	1.19339	0.598617	0.549428	NA	3.54757	2.23925	0.840006	2.20894	5.09912	1.93362	3.54072	3.52449	1.59555	0.674058
ENSSSCG00000002935	-	9.67599	0.650419	0.723024	0.899581	0.368343	0.998184	3.54757	7.83738	10.9201	7.43501	15.2974	11.6017	8.8518	11.917	1.60282	0.680611
ENSSSCG00000014127	RASGRF2	15.9452	0.709321	0.60062	1.18098	0.237611	0.998184	15.3728	14.5551	6.72005	12.216	15.2974	25.1371	18.5888	19.6744	1.61055	0.687549
ENSSSCG00000029281	PCDHAC2	27.2067	0.717594	0.785726	0.913288	0.361091	0.998184	36.6582	21.2729	4.20003	20.7104	19.3767	45.4401	36.2924	33.703	1.62735	0.702525
ENSSSCG00000009281	-	34.3213	0.720889	0.682384	1.05643	0.290773	0.998184	43.7534	26.871	7.56005	26.0615	38.7533	58.0086	30.9813	42.5811	1.63387	0.708294
ENSSSCG00000028157	CASP8	12.6758	0.706572	0.603525	1.17074	0.241703	0.998184	8.27766	7.83738	12.6001	9.57171	15.2974	12.5685	19.474	15.78	1.6486	0.721245
ENSSSCG00000008266	LOXL3	3.85788	0.767514	1.15412	0.665023	0.506036	NA	4.73009	2.23925	1.68001	2.88312	3.05947	9.6681	1.77036	4.83265	1.67619	0.745183
ENSSSCG00000038215	-	0.528193	0.821579	2.95771	0.277775	0.781185	NA	1.18252	0	0	0.394174	1.01982	0.96681	0	0.662212	1.68	0.748458
ENSSSCG00000015427	ORC5	11.6015	0.736849	0.676983	1.08843	0.276405	0.998184	4.73009	6.71775	14.2801	8.57598	15.2974	13.5353	15.0481	14.6269	1.70557	0.770253
ENSSSCG00000008943	SLC4A4	16.7631	0.801996	0.624903	1.28339	0.199355	0.998184	16.5553	14.5551	5.88004	12.3302	22.4361	26.1039	15.0481	21.196	1.71904	0.781602
ENSSSCG00000009125	-	24.5041	0.807159	0.737509	1.09444	0.273762	0.998184	28.3806	21.2729	4.20003	17.9512	27.5353	43.5065	22.1295	31.0571	1.73009	0.790845
ENSSSCG00000028461	-	82.7756	0.79341	0.527148	1.5051	0.132299	0.959146	67.4038	64.9383	49.5604	60.6341	57.1102	178.86	78.781	104.917	1.73033	0.791047
ENSSSCG00000030165	MAFF	23.5316	0.78029	0.532828	1.46443	0.143076	0.978541	11.8252	14.5551	25.2002	17.1935	24.4758	27.0707	38.0627	29.8697	1.73727	0.79682
ENSSSCG00000021818	ENOX1	18.8544	0.846398	0.802624	1.05454	0.291637	0.998184	24.833	13.4355	2.52002	13.5962	26.5154	29.0043	16.8184	24.1127	1.77349	0.826594
ENSSSCG00000011176	SUSD4	1.45852	0.862231	1.53194	0.562836	0.573546	NA	1.18252	1.11963	0.840006	1.04738	1.01982	1.93362	2.65554	1.86966	1.78508	0.835986
ENSSSCG00000002259	-	51.4619	0.850595	0.501659	1.69557	0.0899683	0.892269	41.3883	29.1103	39.4803	36.6596	89.7446	75.4112	33.6368	66.2642	1.80755	0.854038
ENSSSCG00000028051	ZNF385C	1.47213	0.875917	1.53337	0.571238	0.567838	NA	1.18252	1.11963	0.840006	1.04738	1.01982	2.90043	1.77036	1.89687	1.81106	0.856831
ENSSSCG00000008838	LNX1	7.16961	0.901391	0.790594	1.14014	0.254226	0.998184	7.09514	5.59813	2.52002	5.07109	11.2181	7.73448	8.8518	9.26812	1.82764	0.869979
ENSSSCG00000035446	CAVIN1	943.79	0.875713	0.461265	1.8985	0.05763	0.783987	1007.51	633.708	357.003	666.073	907.644	1493.72	1263.15	1221.51	1.83389	0.874908
ENSSSCG00000016298	INPP5D	23.4696	0.884869	0.52239	1.69388	0.0902873	0.892269	20.1029	13.4355	15.9601	16.4995	27.5353	42.5397	21.2443	30.4397	1.84489	0.883534
ENSSSCG00000037483	RFTN2	23.4438	0.930087	0.690918	1.34616	0.17825	0.998184	22.4679	21.2729	5.04004	16.2603	33.6542	39.6392	18.5888	30.6274	1.88357	0.913471
ENSSSCG00000002283	FUT8	16.1193	0.920462	0.605804	1.51941	0.12866	0.955979	14.1903	10.0766	9.24007	11.169	30.5947	19.3362	13.2777	21.0695	1.88643	0.915661
ENSSSCG00000004387	-	116.329	0.932836	0.426442	2.18749	0.0287071	0.611556	79.2291	88.4504	72.2405	79.9733	203.965	168.225	85.8625	152.684	1.90919	0.932959
ENSSSCG00000030016	PDE9A	19.6666	0.974235	0.58697	1.65977	0.0969608	0.902197	18.9204	14.5551	6.72005	13.3985	32.6344	21.2698	23.8999	25.9347	1.93564	0.95281
ENSSSCG00000016093	-	8.92113	0.987634	0.863402	1.14389	0.252671	0.998184	2.36505	12.3159	3.36002	6.01365	10.1982	16.4358	8.8518	11.8286	1.96696	0.975968
ENSSSCG00000035196	BTBD8	9.08103	1.01597	0.733896	1.38436	0.16625	0.998184	5.91262	8.957	3.36002	6.07655	14.2775	8.70129	13.2777	12.0855	1.98888	0.991955
ENSSSCG00000004244	MAN1A1	53.7669	1.00063	0.729031	1.37255	0.169892	0.998184	54.3961	42.5458	10.9201	35.954	60.1696	121.818	32.7517	71.5798	1.99087	0.993402
ENSSSCG00000011023	ZNF438	14.308	0.977205	0.570246	1.71366	0.0865919	0.881893	7.09514	8.957	12.6001	9.55074	17.337	21.2698	18.5888	19.0652	1.9962	0.997257
ENSSSCG00000006726	-	9.18349	1.04265	1.09994	0.947911	0.343175	0.998184	5.91262	12.3159	0	6.07616	12.2379	8.70129	15.9332	12.2908	2.02279	1.01635
ENSSSCG00000005490	WHRN	8.33784	1.01069	0.821741	1.22994	0.218721	0.998184	3.54757	4.4785	8.40006	5.47538	5.09912	12.5685	15.9332	11.2003	2.04558	1.03251
ENSSSCG00000032826	KCTD16	1.17099	1.1214	1.8167	0.617271	0.537056	NA	1.18252	1.11963	0	0.767383	1.01982	1.93362	1.77036	1.5746	2.05191	1.03697
ENSSSCG00000004053	TAGAP	9.09042	1.04699	0.752247	1.39182	0.163978	0.998184	4.73009	4.4785	8.40006	5.86955	7.13877	17.4026	12.3925	12.3113	2.09748	1.06866
ENSSSCG00000017993	NTN1	40.6745	1.08549	0.694064	1.56397	0.117825	0.937738	33.1107	33.5888	11.7601	26.1532	45.8921	96.681	23.0147	55.1959	2.11049	1.07758
ENSSSCG00000015401	PCLO	7.03144	1.11589	1.08564	1.02787	0.304011	0.998184	5.91262	6.71775	0.840006	4.49012	19.3767	5.80086	3.54072	9.57275	2.13196	1.09218
ENSSSCG00000011782	ABCC5	75.5734	1.1006	0.506956	2.17099	0.029932	0.611556	49.666	41.4261	52.9204	48.0042	121.359	141.154	46.9145	103.143	2.14862	1.10341
ENSSSCG00000003811	ROR1	1.6557	1.12085	1.51626	0.739217	0.459775	NA	1.18252	1.11963	0.840006	1.04738	2.03965	3.86724	0.88518	2.26402	2.1616	1.1121
ENSSSCG00000001787	IL16	11.4784	1.12542	0.674397	1.66877	0.095162	0.896576	7.09514	7.83738	6.72005	7.21752	14.2775	23.2034	9.73698	15.7393	2.18071	1.1248
ENSSSCG00000035634	PLSCR1	14.6311	1.12242	0.626625	1.79121	0.07326	0.832261	7.09514	11.1963	9.24007	9.17715	29.5749	17.4026	13.2777	20.0851	2.18859	1.13
ENSSSCG00000010303	SYNPO2L	0.448666	0.744236	3.06751	0.242619	0.808301	NA	0	0	0.840006	0.280002	0	0.96681	0.88518	0.61733	2.20473	1.14061
ENSSSCG00000016119	-	4.19487	1.20788	1.10274	1.09534	0.273366	NA	3.54757	3.35888	0.840006	2.58215	5.09912	9.6681	2.65554	5.80759	2.24913	1.16937
ENSSSCG00000036033	THRB	88.2336	1.19035	0.577324	2.06184	0.0392232	0.675627	76.864	57.1009	27.7202	53.895	164.192	145.988	57.5367	122.572	2.27428	1.18541
ENSSSCG00000036516	-	2.80972	1.19074	1.21256	0.981999	0.3261	NA	1.18252	2.23925	1.68001	1.7006	6.11895	3.86724	1.77036	3.91885	2.3044	1.20439
ENSSSCG00000000541	FAR2	6.17241	1.21061	0.806306	1.50143	0.133244	NA	3.54757	3.35888	4.20003	3.70216	9.17842	9.6681	7.08144	8.64265	2.33449	1.22311
ENSSSCG00000030626	ALDH1L1	190.07	1.25133	0.844586	1.4816	0.138448	0.969947	138.355	185.858	13.4401	112.551	427.306	253.304	122.155	267.589	2.37749	1.24944
ENSSSCG00000030801	-	5.70815	1.351	0.962674	1.40339	0.160501	NA	4.73009	3.35888	1.68001	3.25633	12.2379	8.70129	3.54072	8.15997	2.50588	1.32532
ENSSSCG00000007477	NFATC2	13.4711	1.37889	0.785377	1.75571	0.0791382	0.853058	10.6427	7.83738	4.20003	7.56004	9.17842	34.8052	14.1629	19.3822	2.56376	1.35826
ENSSSCG00000008794	RHOH	3.53101	1.33422	1.05026	1.27037	0.203952	NA	1.18252	2.23925	2.52002	1.9806	5.09912	4.83405	5.31108	5.08142	2.5656	1.3593
ENSSSCG00000011496	ADAMTS9	54.5415	1.35904	0.617918	2.19938	0.0278506	0.605891	35.4757	26.871	29.4002	30.5823	138.696	66.7099	30.0961	78.5007	2.56687	1.36001
ENSSSCG00000023611	TNXB	662.364	1.38376	0.82059	1.6863	0.0917384	0.893245	567.611	469.123	64.6805	367.138	748.551	1769.26	354.957	957.59	2.60826	1.38309
ENSSSCG00000002752	ZFHX3	17.7305	1.48103	0.740041	2.00127	0.0453628	0.716168	13.0078	6.71775	8.40006	9.37519	19.3767	47.3737	11.5073	26.0859	2.78244	1.47635
ENSSSCG00000017978	ALOX15B	17.4176	1.49093	1.41632	1.05268	0.292487	0.998184	1.18252	3.35888	22.6802	9.07385	8.1586	0.96681	68.1589	25.7614	2.83908	1.50543
ENSSSCG00000003690	-	1.31109	1.55514	2.05276	0.757585	0.4487	NA	0	1.11963	0.840006	0.65321	2.03965	3.86724	0	1.96896	3.01429	1.59182
ENSSSCG00000008568	DRC1	7.0369	1.68266	1.24898	1.34723	0.177907	0.998184	7.09514	2.23925	0.840006	3.39147	24.4758	5.80086	1.77036	10.6823	3.14977	1.65525
ENSSSCG00000009745	ADGRD1	34.6914	1.75995	0.66432	2.64925	0.00806713	0.367362	15.3728	13.4355	18.4801	15.7628	57.1102	86.0461	17.7036	53.62	3.40167	1.76625
ENSSSCG00000030156	APBB1IP	13.3547	1.8037	0.881075	2.04716	0.0406428	0.678479	10.6427	6.71775	0.840006	6.06682	21.4163	29.0043	11.5073	20.6427	3.40255	1.76662
ENSSSCG00000016497	DENND2A	34.0134	1.82571	0.595222	3.06728	0.00216016	0.203643	20.1029	16.7944	8.40006	15.0991	43.8525	82.1789	32.7517	52.9277	3.50535	1.80956
ENSSSCG00000004052	FNDC1	109.331	2.27146	1.02161	2.22341	0.0261882	0.59607	27.198	21.2729	63.8405	37.4371	85.6653	444.733	13.2777	181.225	4.84079	2.27524
ENSSSCG00000029231	-	1.09727	2.36563	1.9997	1.18299	0.236812	NA	0	0	0.840006	0.280002	2.03965	1.93362	1.77036	1.91454	6.83761	2.77349
ENSSSCG00000003748	CELF4	0.420003	-2.28764	4.01342	-0.569997	0.56868	NA	0	0	2.52002	0.840006	0	0	0	0	0	#NUM!
ENSSSCG00000004621	MYO5C	0.746608	-3.10513	3.2712	-0.949233	0.342502	NA	0	1.11963	3.36002	1.49322	0	0	0	0	0	#NUM!
ENSSSCG00000006731	VTCN1	1.6437	-4.24621	2.23639	-1.89869	0.0576056	NA	1.18252	1.11963	7.56005	3.2874	0	0	0	0	0	#NUM!
ENSSSCG00000007838	OTOA	0.140001	-1.07835	4.08047	-0.264272	0.791571	NA	0	0	0.840006	0.280002	0	0	0	0	0	#NUM!
ENSSSCG00000009374	-	0.140001	-1.07835	4.08047	-0.264272	0.791571	NA	0	0	0.840006	0.280002	0	0	0	0	0	#NUM!
ENSSSCG00000009543	-	0.420003	-2.28764	4.01342	-0.569997	0.56868	NA	0	0	2.52002	0.840006	0	0	0	0	0	#NUM!
ENSSSCG00000009722	SPOCK3	0.140001	-1.07835	4.08047	-0.264272	0.791571	NA	0	0	0.840006	0.280002	0	0	0	0	0	#NUM!
ENSSSCG00000016176	MARCHF4	0.140001	-1.07835	4.08047	-0.264272	0.791571	NA	0	0	0.840006	0.280002	0	0	0	0	0	#NUM!
ENSSSCG00000016423	DPP6	0.72078	-3.02324	2.60939	-1.1586	0.24662	NA	2.36505	1.11963	0.840006	1.44156	0	0	0	0	0	#NUM!
ENSSSCG00000026293	STX5	0.326605	-1.9027	4.04539	-0.470339	0.638113	NA	0	1.11963	0.840006	0.65321	0	0	0	0	0	#NUM!
ENSSSCG00000026978	ROS1	0.140001	-1.07835	4.08047	-0.264272	0.791571	NA	0	0	0.840006	0.280002	0	0	0	0	0	#NUM!
ENSSSCG00000027401	OPRD1	0.140001	-1.07835	4.08047	-0.264272	0.791571	NA	0	0	0.840006	0.280002	0	0	0	0	0	#NUM!
ENSSSCG00000031290	GRIN2A	0.140001	-1.07835	4.08047	-0.264272	0.791571	NA	0	0	0.840006	0.280002	0	0	0	0	0	#NUM!
ENSSSCG00000032832	TEX36	0.186604	-1.07835	4.08047	-0.264272	0.791571	NA	0	1.11963	0	0.373208	0	0	0	0	0	#NUM!
ENSSSCG00000040130	FAM155A	0.140001	-1.07835	4.08047	-0.264272	0.791571	NA	0	0	0.840006	0.280002	0	0	0	0	0	#NUM!
