# Supplementary material for: Detection of genomic structure variants associated with wrinkled skin in Xiang pig by next generation sequencing
Source: Aging (Albany NY). 2021 Nov 27;13(22):24710–39. doi: 10.18632/aging.203711 (PMC8660620; doi:10.18632/aging.203711)
Supplement: Supplementary Table 11 [file aging-13-203711-s008.xlsx]

## Sheet: Sheet1
Supplementary Table 11. Differential splicing of SE, MXE, A5SS, A3SS.
GeneID	geneSymbol	chr	strand	exonStart_0base	exonEnd	2ndExonStart_0base	2ndExonEnd	upstreamES	upstreamEE	downstreamES	downstreamEE	type	IC_SAMPLE_1 XP			SC_SAMPLE_1 XP			IC_SAMPLE_2 WXP			SC_SAMPLE_2 WXP			IncFormLen	SkipFormLen	PValue	FDR	IncLevel1 XP			IncLevel2 WXP			IncLevelDifference	XP			XP-medium	WXP			WXP-medium
																																				counts_25S	counts_26S	counts_33		counts_27	counts_31	counts_32
ENSSSCG00000027986	ABCB8	18	-	6191517	6191612	-	-	6191269	6191375	6191688	6191844	SE	124	96	145	0	1	17	136	145	69	0	0	0	236	141	1.01331e-05	0.000324212	1	0.983	0.836	1	1	1	-0.06	5047.54	4205.65	4934.14	4729.11	3379.58	4658	3010.37	3682.65
ENSSSCG00000011496	ADAMTS9	13	-	46082907	46083075	-	-	46075636	46075810	46107666	46107843	SE	34	32	36	0	0	1	160	153	62	1	20	0	309	141	0.000418321	0.00632356	1	1	0.943	0.986	0.777	1	0.06	1593.64	1185.73	1726.67	1502.02	6211.9	4083	1576.77	3957.23
ENSSSCG00000033732	ANKRD10	11	-	77352360	77352513	-	-	77348541	77348633	77355749	77356116	SE	122	121	232	2	10	8	156	432	308	1	3	0	294	141	8.44977e-07	4.42885e-05	0.967	0.853	0.933	0.987	0.986	1	-0.073	4055.56	3954.37	6173.66	4727.87	5689.18	10394	7417.86	7833.68
ENSSSCG00000030156	APBB1IP	10	-	49137670	49137769	-	-	49136668	49136783	49151747	49151858	SE	17	18	3	8	0	0	40	256	47	0	0	0	240	141	0.000917633	0.0120182	0.555	1	1	1	1	1	-0.148	489.982	287.17	61.6998	279.617	973.977	1746	606.52	1108.83
ENSSSCG00000026465	BABAM2	3	-	110994443	110994514	-	-	110934986	110935140	111101330	111101440	SE	2	1	4	1	1	3	3	2	2	0	0	0	212	141	0.000152716	0.0028307	0.571	0.399	0.47	1	1	1	-0.52	1438.72	1482.17	1017.59	1312.82	1147.86	1736	1414.92	1432.93
ENSSSCG00000008513	BIRC6	3	-	107017631	107017766	-	-	107013930	107014110	107024810	107024999	SE	159	153	374	5	7	3	163	160	406	2	0	0	276	141	0.00116542	0.0146197	0.942	0.918	0.985	0.977	1	1	-0.044	2757.35	2471.05	2745.18	2657.86	2967.8	3525	2788.92	3093.91
ENSSSCG00000010943	C9orf3	10	-	27103302	27103419	-	-	27084096	27084183	27160093	27160168	SE	363	422	483	25	26	21	359	687	542	12	16	18	258	141	0.00100813	0.0129534	0.888	0.899	0.926	0.942	0.959	0.943	-0.044	4459.08	5033.58	6169.98	5220.88	3140.62	5243	4370.15	4251.26
ENSSSCG00000016611	CADPS2	18	+	24572972	24573209	-	-	24566862	24566943	24578355	24578477	SE	17	7	3	0	0	0	15	69	16	1	6	0	378	141	0.00100368	0.0129088	1	1	1	0.848	0.811	1	0.114	314.645	465.493	335.205	371.781	455.518	675	482.904	537.807
ENSSSCG00000021439	CCDC66	13	+	38450277	38450719	-	-	38441578	38441604	38452347	38452513	SE	2	6	36	0	0	6	10	28	39	0	0	0	583	141	0.00182298	0.020952	1	1	0.592	1	1	1	-0.136	182.542	222.325	674.093	359.654	404.313	366	381.521	383.944
ENSSSCG00000036686	CDC42SE2	2	+	133634725	133634809	-	-	133606431	133606686	133638587	133638912	SE	0	0	0	1	4	7	0	4	2	1	0	0	225	141	1.06423e-06	5.3064e-05	0	0	0	0	1	1	-0.667	3811.77	3228.34	3079.46	3373.19	1791.14	2666	2574.6	2343.91
ENSSSCG00000006701	CHD1L	4	-	100279112	100279261	-	-	100278135	100278299	100284210	100284376	SE	21	36	74	0	3	5	59	37	66	0	0	0	290	141	0.000821269	0.0109347	1	0.854	0.878	1	1	1	-0.089	1305.42	1322.37	2596	1741.26	1222.54	1346	1190.81	1253.12
ENSSSCG00000021363	CHD3	12	+	53151753	53151834	-	-	53151424	53151556	53152712	53152830	SE	0	0	23	134	130	187	2	3	0	185	220	151	222	141	0.000686074	0.00951267	0	0	0.072	0.007	0.009	0	0.019	14213.1	10770	18763.2	14582.1	14440	20213	12961.9	15871.7
ENSSSCG00000011236	CLASP2	13	-	19351887	19351938	-	-	19347908	19348052	19352070	19352149	SE	6	2	0	7	8	31	6	29	38	17	13	24	192	141	0.000669049	0.00932546	0.386	0.155	0	0.206	0.621	0.538	-0.275	1841.04	1614.17	2333.54	1929.58	2675.5	3387	2483	2848.5
ENSSSCG00000011236	CLASP2	13	-	19372713	19372776	-	-	19371622	19371729	19376545	19376653	SE	15	4	0	8	10	26	0	0	4	84	128	48	204	141	4.01426e-06	0.000151574	0.564	0.217	0	0	0	0.054	0.242	1841.04	1614.17	2333.54	1929.58	2675.5	3387	2483	2848.5
ENSSSCG00000009369	COG6	11	+	14579872	14580016	-	-	14576292	14576454	14582826	14582898	SE	71	40	187	5	1	4	79	74	159	1	0	0	285	141	0.0018412	0.0211064	0.875	0.952	0.959	0.975	1	1	-0.063	1107.26	1087.31	2229.48	1474.68	1490.3	1471	1628.36	1529.89
ENSSSCG00000006752	CSDE1	4	+	105823162	105823255	-	-	105822617	105822727	105823872	105823970	SE	16	23	23	134	127	163	83	122	39	289	356	272	234	141	0.000752977	0.0102208	0.067	0.098	0.078	0.148	0.171	0.08	-0.052	18499.2	17442.1	17978.6	17973.3	21782.7	26640	21530.6	23317.8
ENSSSCG00000040954	CSTF3	2	+	27847904	27848058	-	-	27845516	27845712	27848912	27848971	SE	18	52	106	1	0	0	47	58	68	1	0	9	295	141	0.000624822	0.00881109	0.896	1	1	0.957	1	0.783	0.052	1182.92	1589.85	2334.46	1702.41	1273.74	1065	1671.93	1336.89
ENSSSCG00000028740	CTDSPL	13	+	22819958	22820144	-	-	22816351	22816444	22825017	22825143	SE	287	320	380	4	8	8	352	773	831	0	0	5	327	141	2.42193e-05	0.000645581	0.969	0.945	0.953	1	1	0.986	-0.04	1355.86	1336.27	891.424	1194.52	989.979	2097	1928.95	1671.98
ENSSSCG00000016857	DAB2	16	-	24539270	24539511	-	-	24537842	24537968	24543944	24544211	SE	169	79	29	2	6	4	68	209	147	0	2	0	382	141	5.25185e-05	0.00122261	0.969	0.829	0.728	1	0.975	1	-0.15	11237.2	7740.84	2107.92	7028.64	5894	9256	5407.99	6852.66
ENSSSCG00000005585	DENND1A	1	-	264644524	264644644	-	-	264571275	264571345	264683711	264683755	SE	30	28	20	0	0	25	15	27	42	0	0	0	261	141	0.00323793	0.0333482	1	1	0.302	1	1	1	-0.233	1090.45	1126.68	1375.81	1197.65	752.085	1156	877.764	928.617
ENSSSCG00000016907	DHX29	16	-	34439258	34439483	-	-	34437755	34437892	34440187	34440263	SE	52	58	116	9	20	0	126	210	170	0	0	7	366	141	4.1615e-05	0.00100046	0.69	0.528	1	1	1	0.903	-0.228	1276.6	1958.08	1712.86	1649.18	2090.9	1919	1808.89	1939.6
ENSSSCG00000035045	DOCK1	14	+	136738423	136738577	-	-	136734383	136734582	136740724	136740870	SE	76	79	156	0	0	21	111	153	102	0	0	0	295	141	1.98342e-06	8.5783e-05	1	1	0.78	1	1	1	-0.073	3409.46	2842.75	3742.51	3331.57	3193.96	4183	2535.47	3304.14
ENSSSCG00000007592	EIF2AK1	3	+	5103856	5103939	-	-	5103030	5103145	5105267	5105501	SE	81	95	234	2	3	0	81	148	222	5	5	16	224	141	4.308e-05	0.00102821	0.962	0.952	1	0.911	0.949	0.897	0.052	1030.4	1118.57	1920.98	1356.65	879.033	1484	1370.45	1244.49
ENSSSCG00000029808	EIF2B3	6	+	166438667	166438757	-	-	166422360	166422472	166456682	166456810	SE	53	83	222	3	5	9	78	108	94	3	0	0	231	141	0.000466951	0.00694367	0.915	0.91	0.938	0.941	1	1	-0.059	734.973	1157.94	2554.56	1482.49	816.093	911	863.535	863.543
ENSSSCG00000008467	EML4	3	-	98033104	98033172	-	-	98021703	98021792	98033872	98034004	SE	6	10	35	11	10	12	15	52	17	2	2	8	209	141	0.00135727	0.0165099	0.269	0.403	0.663	0.835	0.946	0.589	-0.345	1335.44	1335.11	2226.72	1632.42	914.237	1513	1518.97	1315.4
ENSSSCG00000021818	ENOX1	11	+	23447419	23447564	-	-	23378043	23378109	23565531	23565675	SE	25	8	20	0	0	0	36	100	36	2	6	1	286	141	0.00111511	0.0140352	1	1	1	0.899	0.892	0.947	0.087	1084.45	566.234	167.602	606.094	1188.4	1777	894.661	1286.69
ENSSSCG00000022318	ERG	13	-	202026046	202026127	-	-	202014836	202014905	202026936	202027140	SE	45	45	37	5	3	0	101	149	81	3	0	0	222	141	0.00346708	0.0351693	0.851	0.905	1	0.955	1	1	-0.066	3037.17	2041.45	1086.65	2055.09	3179.03	3785	3091.3	3351.77
ENSSSCG00000004052	FNDC1	1	-	8056965	8057064	-	-	8055372	8055490	8060533	8060740	SE	23	18	111	0	0	13	100	850	28	1	0	0	240	141	1.29123e-06	6.20283e-05	1	1	0.834	0.983	1	1	-0.05	1198.54	929.828	3725.01	1951.12	3857.5	27189	722.132	10589.5
ENSSSCG00000009523	GGACT	11	-	69344393	69344562	-	-	69287674	69288769	69348763	69348844	SE	143	91	116	8	5	6	115	99	191	0	0	0	310	141	8.69287e-08	7.05803e-06	0.89	0.892	0.898	1	1	1	-0.107	2192.91	1727.65	1339.9	1753.49	1287.61	971	1730.63	1329.75
ENSSSCG00000002873	GPI	6	+	44065217	44065347	-	-	44064175	44064328	44065485	44065562	SE	1266	1261	1938	70	50	30	1685	1332	1454	17	25	34	271	141	1.24273e-05	0.000378091	0.904	0.929	0.971	0.981	0.965	0.957	-0.033	16903.2	14981.5	16878.1	16254.3	16181	13313	12881.9	14125.3
ENSSSCG00000004561	HERC1	1	+	108368626	108368754	-	-	108367818	108367946	108369579	108369780	SE	19	21	17	2	4	0	24	33	21	0	0	0	269	141	0.00353994	0.0356948	0.833	0.733	1	1	1	1	-0.145	3536.76	3150.76	2782.02	3156.51	2517.62	3438	2555.03	2836.88
ENSSSCG00000016298	INPP5D	15	+	133516254	133516318	-	-	133501091	133501408	133554578	133554729	SE	19	7	11	0	0	0	55	97	29	0	0	22	205	141	0.00292205	0.0308367	1	1	1	1	1	0.476	0.175	916.315	591.709	931.943	813.322	1247.07	2593	1146.34	1662.14
ENSSSCG00000011075	KIAA1217	10	-	50710063	50711662	-	-	50709413	50709536	50711776	50711854	SE	69	128	696	5	11	0	206	205	342	2	0	0	1740	141	3.90456e-05	0.000953245	0.528	0.485	1	0.893	1	1	-0.293	1359.46	1251.74	3089.59	1900.26	1973.56	1772	1812.45	1852.67
ENSSSCG00000017116	LPCAT1	16	+	79170882	79171024	-	-	79167919	79168018	79171971	79176787	SE	228	151	208	11	3	0	165	416	522	0	0	0	283	141	0.000479937	0.00708333	0.912	0.962	1	1	1	1	-0.042	3671.26	2496.52	2229.48	2799.09	1666.32	5427	5363.52	4152.28
ENSSSCG00000012318	MAGED1	X	+	45327174	45327217	-	-	45327003	45327083	45327488	45327551	SE	330	209	247	0	0	0	138	176	121	0	13	2	184	141	0.000492839	0.00724318	1	1	1	1	0.912	0.979	0.036	7527.47	5122.74	4759.17	5803.13	2825.92	4928	2721.34	3491.75
ENSSSCG00000015667	MBD5	15	-	3692792	3694001	-	-	3681797	3681871	3697808	3698017	SE	40	39	48	0	1	0	94	65	70	2	1	3	1350	141	0.00204126	0.0229622	1	0.803	1	0.831	0.872	0.709	0.13	526.01	406.438	361.911	431.453	642.206	531	504.248	559.151
ENSSSCG00000000488	MDM2	5	+	33106806	33106891	-	-	33105736	33106073	33110080	33110155	SE	19	23	36	0	0	0	30	49	39	1	0	9	226	141	0.000166171	0.00301808	1	1	1	0.949	1	0.73	0.107	1624.87	1692.91	2036.09	1784.62	1351.62	1475	1586.56	1471.06
ENSSSCG00000024667	MICU2	11	-	1456657	1456705	-	-	1455411	1455494	1463159	1463235	SE	110	103	129	2	2	9	231	176	157	2	0	0	189	141	0.00073294	0.0100156	0.976	0.975	0.914	0.989	1	1	-0.041	3043.17	2728.11	3222.2	2997.83	3372.12	3768	3329.63	3489.92
ENSSSCG00000013470	MRPS33	18	+	8888755	8888996	-	-	8884827	8884880	8893252	8894338	SE	255	264	1443	27	15	0	467	526	679	14	1	6	382	141	0.00507191	0.0473706	0.777	0.867	1	0.925	0.995	0.977	-0.084	921.119	1189.21	2974.48	1694.94	1414.56	1337	1374.9	1375.49
ENSSSCG00000006063	NA	4	+	36226051	36226182	-	-	36225409	36225494	36226749	36226843	SE	2114	2437	4346	6	44	57	2942	5201	4753	17	10	7	272	141	3.31834e-08	3.28662e-06	0.995	0.966	0.975	0.989	0.996	0.997	-0.015	39043.7	38171.6	44019.6	40411.6	43826.8	67980	46577.5	52794.8
ENSSSCG00000007080	NA	17	-	24990284	24990317	-	-	24989882	24989936	25007651	25007740	SE	0	0	3	23	12	47	1	8	14	35	61	27	174	141	0.000158117	0.00291246	0	0	0.049	0.023	0.096	0.296	-0.122	1940.71	1197.31	2189.88	1775.97	2017.3	3337	2779.14	2711.15
ENSSSCG00000010278	NA	14	+	74718552	74718722	-	-	74717776	74718001	74718945	74719083	SE	4	6	82	0	0	11	23	12	9	0	0	0	311	141	3.03429e-05	0.000778242	1	1	0.772	1	1	1	-0.076	383.099	506.021	2931.2	1273.44	660.342	725	692.785	692.709
ENSSSCG00000013405	NA	2	+	48674024	48674138	-	-	48673214	48673375	48674726	48674852	SE	1156	1016	1547	162	230	268	1453	1571	1150	184	134	170	255	141	0.000160587	0.00294158	0.798	0.71	0.761	0.814	0.866	0.789	-0.067	34284.3	32108.6	40152.8	35515.2	31384.9	34478	24539.2	30134
ENSSSCG00000014022	NA	2	+	78970407	78970457	-	-	78969824	78969917	78971046	78974724	SE	464	690	1438	46	59	151	747	1085	1152	74	28	48	191	141	2.34642e-06	9.81161e-05	0.882	0.896	0.875	0.882	0.966	0.947	-0.047	11478.6	12938.8	19010.9	14476.1	11999.2	13410	14073.6	13160.9
ENSSSCG00000016687	NA	18	-	43322168	43322454	-	-	43249002	43249080	43324197	43324311	SE	7	25	178	0	0	10	26	31	40	0	0	0	427	141	0.000138192	0.00261272	1	1	0.855	1	1	1	-0.048	68.4534	288.328	1488.16	614.981	187.755	354	289.92	277.225
ENSSSCG00000016725	NA	18	+	49178080	49178158	-	-	49176500	49176596	49179085	49179163	SE	131	109	117	7	5	0	100	241	191	0	0	0	219	141	0.000955537	0.0123934	0.923	0.933	1	1	1	1	-0.048	12772	10237.4	2910.94	8640.09	5737.18	12221	7946.12	8634.77
ENSSSCG00000028097	NA	6	+	165731772	165731887	-	-	165729760	165730738	165734421	165734551	SE	99	123	219	0	0	12	183	268	245	1	0	0	256	141	0.00220064	0.0244537	1	1	0.91	0.99	1	1	-0.027	3135.65	3220.24	4023.38	3459.75	3316.64	3986	3471.93	3591.52
ENSSSCG00000030801	NA	4	+	127191194	127191407	-	-	127190232	127190513	127199672	127199775	SE	9	9	10	1	0	0	16	13	15	1	15	5	354	141	7.80554e-06	0.000261352	0.782	1	1	0.864	0.257	0.544	0.372	234.183	147.059	100.377	160.54	555.796	509	178.754	414.517
ENSSSCG00000009714	NEK1	14	+	20259250	20259334	-	-	20238834	20238937	20259754	20259838	SE	10	10	10	4	11	13	56	40	45	5	10	21	225	141	0.00296364	0.0311559	0.61	0.363	0.325	0.875	0.715	0.573	-0.288	1012.39	882.352	1301.22	1065.32	1263.08	1476	1403.36	1380.81
ENSSSCG00000030386	NUP205	18	-	13689547	13689674	-	-	13679737	13679904	13689883	13690012	SE	1457	838	257	241	192	4	977	553	519	22	3	0	268	141	8.54872e-15	3.77127e-12	0.761	0.697	0.971	0.959	0.99	1	-0.173	11487	7517.36	2718.47	7240.93	5341.41	3821	3481.71	4214.71
ENSSSCG00000011215	OXSM	13	+	12686771	12687779	-	-	12685932	12685998	12691291	12692146	SE	203	154	205	14	29	10	292	230	174	19	1	0	1149	141	0.000649266	0.0090921	0.64	0.395	0.716	0.653	0.966	1	-0.289	610.076	494.441	312.183	472.233	561.13	376	360.177	432.436
ENSSSCG00000001052	PHACTR1	7	+	9575939	9576146	-	-	9573756	9573924	9591726	9592048	SE	9	5	13	0	1	0	13	3	8	2	6	0	348	141	0.000309286	0.00498265	1	0.67	1	0.725	0.168	1	0.259	1043.61	744.557	1092.18	960.117	746.751	870	1342.88	986.544
ENSSSCG00000035634	PLSCR1	13	-	86854420	86854644	-	-	86852853	86852896	86859846	86859927	SE	30	74	102	0	0	0	193	263	201	5	7	2	365	141	0.00131248	0.0160592	1	1	1	0.937	0.936	0.975	0.051	293.029	486.336	547.01	442.125	1327.08	1080	699.01	1035.36
ENSSSCG00000031510	POMK	17	+	11965714	11965804	-	-	11963655	11963902	11966641	11966944	SE	50	22	92	1	6	2	83	100	70	0	0	0	231	141	0.000896702	0.0118201	0.968	0.691	0.966	1	1	1	-0.125	1666.9	1602.59	1862.04	1710.51	1411.36	1867	1319.76	1532.71
ENSSSCG00000010860	PSEN2	10	+	14539358	14540037	-	-	14533551	14533694	14544615	14544812	SE	28	16	76	0	0	7	16	26	37	0	0	0	820	141	0.000684391	0.00949431	1	1	0.651	1	1	1	-0.116	1359.46	1503.01	3510.44	2124.3	763.82	1688	1300.19	1250.67
ENSSSCG00000008600	PUM2	3	+	117900026	117900196	-	-	117899268	117899456	117903318	117903589	SE	55	35	33	0	0	0	87	143	75	0	7	7	311	141	8.64767e-05	0.00180374	1	1	1	1	0.903	0.829	0.089	3265.35	4077.11	5469.18	4270.55	3909.78	5831	4963.33	4901.37
ENSSSCG00000003775	RABGGTB	6	-	137531876	137532074	-	-	137530555	137530661	137532629	137532737	SE	152	183	397	11	4	0	484	270	205	0	0	0	339	141	0.000162441	0.00297142	0.852	0.95	1	1	1	1	-0.066	1988.75	2291.57	2933.04	2404.45	3032.88	1772	2156.61	2320.5
ENSSSCG00000022155	RBPJ	8	+	20101083	20101266	-	-	20063149	20063394	20124847	20124886	SE	4	4	15	0	2	0	4	28	0	4	4	6	324	141	0.000146236	0.0027355	1	0.465	1	0.303	0.753	0	0.47	1236.97	1908.29	1250.57	1465.28	1385.76	3209	2257.11	2283.96
ENSSSCG00000027459	RNF13	13	+	90127237	90127343	-	-	90108497	90108588	90137744	90137838	SE	146	183	114	12	5	5	241	284	165	2	0	0	247	141	9.41415e-08	7.4052e-06	0.874	0.954	0.929	0.986	1	1	-0.076	3542.76	3037.28	1450.41	2676.82	3035.01	3184	2790.7	3003.24
ENSSSCG00000014394	RNF14	2	+	143581161	143581313	-	-	143579923	143580085	143589816	143589989	SE	94	85	100	3	4	15	86	91	63	3	0	0	293	141	1.65632e-05	0.000472936	0.938	0.911	0.762	0.932	1	1	-0.107	3815.38	3330.24	4551.97	3899.2	2525.09	3076	3551.08	3050.72
ENSSSCG00000014394	RNF14	2	+	143586272	143586501	-	-	143579923	143580085	143589816	143589989	SE	67	74	265	3	4	15	108	195	139	3	0	0	370	141	1.21091e-06	5.90405e-05	0.895	0.876	0.871	0.932	1	1	-0.097	3815.38	3330.24	4551.97	3899.2	2525.09	3076	3551.08	3050.72
ENSSSCG00000014394	RNF14	2	+	143584887	143585415	-	-	143581161	143581313	143586272	143586501	SE	398	164	589	0	8	8	282	451	436	0	0	1	669	141	5.52704e-05	0.00127103	1	0.812	0.939	1	1	0.989	-0.079	3815.38	3330.24	4551.97	3899.2	2525.09	3076	3551.08	3050.72
ENSSSCG00000014394	RNF14	2	+	143584887	143585415	-	-	143574949	143575051	143591198	143591329	SE	227	81	365	0	0	0	150	262	270	0	0	10	669	141	0.0018328	0.0210466	1	1	1	1	1	0.851	0.05	3815.38	3330.24	4551.97	3899.2	2525.09	3076	3551.08	3050.72
ENSSSCG00000038919	RP9	18	+	40558852	40558944	-	-	40550036	40550166	40562599	40562661	SE	8	9	39	16	22	3	40	39	47	4	6	3	233	141	0.00173665	0.0201966	0.232	0.198	0.887	0.858	0.797	0.905	-0.414	727.768	823.297	570.032	707.032	775.555	889	867.092	843.882
ENSSSCG00000017139	RPTOR	12	-	1863621	1863780	-	-	1838274	1838450	1910375	1910458	SE	29	25	63	0	2	0	37	59	50	0	14	0	300	141	0.00207247	0.023254	1	0.855	1	1	0.665	1	0.063	3194.49	2891.38	5474.71	3853.53	2993.41	5213	3696.04	3967.48
ENSSSCG00000017139	RPTOR	12	-	1910375	1910458	-	-	1863621	1863780	1922760	1922863	SE	37	27	69	0	0	0	38	69	29	2	6	1	224	141	0.000405267	0.00617204	1	1	1	0.923	0.879	0.948	0.083	3194.49	2891.38	5474.71	3853.53	2993.41	5213	3696.04	3967.48
ENSSSCG00000017139	RPTOR	12	-	1922760	1922863	-	-	1910375	1910458	1990605	1991573	SE	39	27	39	0	0	2	48	83	42	1	2	11	244	141	0.000842144	0.0111733	1	1	0.918	0.965	0.96	0.688	0.102	3194.49	2891.38	5474.71	3853.53	2993.41	5213	3696.04	3967.48
ENSSSCG00000009281	SGCG	11	+	2368613	2368686	-	-	2366495	2366615	2376065	2376189	SE	156	115	57	3	5	0	171	567	288	4	24	27	214	141	0.00445438	0.042739	0.972	0.938	1	0.966	0.94	0.875	0.043	1947.92	1170.68	442.949	1187.18	1738.86	3576	1644.36	2319.74
ENSSSCG00000004486	SLC17A5	1	+	92297993	92298227	-	-	92295666	92295863	92300799	92300887	SE	51	36	37	3	9	1	52	68	15	1	0	0	375	141	9.50308e-06	0.000309394	0.865	0.601	0.933	0.951	1	1	-0.184	1222.55	1106.99	800.256	1043.27	608.069	1006	795.946	803.338
ENSSSCG00000026293	STX5	2	+	8938594	8938838	-	-	8937806	8937909	8941325	8941396	SE	70	75	107	6	9	0	61	140	125	0	0	0	385	141	5.99062e-07	3.4027e-05	0.81	0.753	1	1	1	1	-0.146	24.0187	42.8439	31.3103	32.7243	20.269	13	11.5612	14.9434
ENSSSCG00000011501	SUCLG2	13	-	48952432	48952585	-	-	48944282	48944379	48959191	48959282	SE	167	151	90	9	7	0	286	258	195	0	3	0	294	141	1.42197e-05	0.000420537	0.899	0.912	1	1	0.976	1	-0.055	3917.46	4043.53	2323.41	3428.13	5728.65	4812	4274.1	4938.25
ENSSSCG00000017707	TAF15	12	-	39705720	39705841	-	-	39695581	39695614	39707293	39707487	SE	54	43	111	18	9	4	79	53	81	0	0	0	262	141	2.41872e-10	4.477e-08	0.618	0.72	0.937	1	1	1	-0.242	4451.87	3351.09	4189.14	3997.37	4304.49	3595	3434.58	3778.02
ENSSSCG00000017707	TAF15	12	-	39688489	39689084	-	-	39686883	39687210	39689191	39689280	SE	942	736	1244	32	18	0	1117	967	973	0	0	0	736	141	3.1164e-13	1.09984e-10	0.849	0.887	1	1	1	1	-0.088	4451.87	3351.09	4189.14	3997.37	4304.49	3595	3434.58	3778.02
ENSSSCG00000005987	TBC1D31	4	-	16265260	16265412	-	-	16262530	16262690	16272610	16272789	SE	13	21	20	0	0	0	19	28	39	0	0	7	293	141	0.00288808	0.0305412	1	1	1	1	1	0.728	0.091	404.716	779.295	888.661	690.891	556.863	719	750.591	675.485
ENSSSCG00000008169	TBC1D8	3	+	53207335	53207446	-	-	53149066	53149414	53231003	53231122	SE	30	20	14	7	10	0	59	52	76	1	1	6	252	141	0.00279974	0.0297682	0.706	0.528	1	0.971	0.967	0.876	-0.193	1349.85	1274.89	946.677	1190.48	963.309	969	1492.29	1141.53
ENSSSCG00000038053	TK2	6	-	27232170	27232250	-	-	27229897	27229978	27233264	27233353	SE	121	83	95	0	0	8	59	84	205	13	2	11	221	141	0.00436944	0.0421329	1	1	0.883	0.743	0.964	0.922	0.085	2920.68	2556.74	4263.73	3247.05	2117.57	3388	3837.44	3114.34
ENSSSCG00000003728	TRAPPC8	6	-	115778920	115779115	-	-	115767500	115767590	115786118	115787035	SE	30	43	54	0	0	0	65	56	25	0	0	8	336	141	0.00382181	0.03793	1	1	1	1	1	0.567	0.144	1521.59	1616.49	2009.39	1715.82	2111.17	1957	1811.56	1959.91
ENSSSCG00000012062	TTC3	13	+	200708915	200708958	-	-	200707865	200708020	200710375	200710526	SE	29	16	8	6	10	0	48	81	29	2	0	5	184	141	0.00235376	0.0258513	0.787	0.551	1	0.948	1	0.816	-0.142	6504.27	5238.53	5982.12	5908.31	4989.37	8744	6683.28	6805.55
ENSSSCG00000009611	XPO7	14	+	6242898	6242992	-	-	6239851	6239998	6243533	6243700	SE	61	75	99	12	5	11	70	128	97	0	7	0	235	141	1.1303e-05	0.000354897	0.753	0.9	0.844	1	0.916	1	-0.14	2596.43	2442.1	3742.51	2927.01	2335.2	3150	2337.15	2607.45
ENSSSCG00000020823	BSCL2	2	+	9064445	9066763	-	-	9064445	9064535	9064652	9066763	RI	0	0	1	103	103	308	18	20	20	215	376	71	258	141	5.46458e-11	7.6231e-09	0	0	0.002	0.044	0.028	0.133	-0.068	737.375	563.918	1157.56	819.618	804.358	1337	763.931	968.43
ENSSSCG00000021363	CHD3	12	+	53159726	53161162	-	-	53159726	53159968	53160998	53161162	RI	164	128	656	20	34	62	136	196	249	58	119	79	1171	141	4.82343e-06	0.000120771	0.497	0.312	0.56	0.22	0.165	0.275	0.236	14213.1	10770	18763.2	14582.1	14440	20213	12961.9	15871.7
ENSSSCG00000021363	CHD3	12	+	53159726	53161162	-	-	53159726	53159922	53160998	53161162	RI	173	139	719	228	142	479	146	224	333	268	489	398	1217	141	2.75811e-08	1.49628e-06	0.081	0.102	0.148	0.059	0.05	0.088	0.045	14213.1	10770	18763.2	14582.1	14440	20213	12961.9	15871.7
ENSSSCG00000016857	DAB2	16	-	24590205	24592386	-	-	24590205	24591186	24592350	24592386	RI	1313	1208	475	10	6	2	903	1605	1287	2	0	5	1305	141	0.00269805	0.0182962	0.934	0.956	0.962	0.98	1	0.965	-0.031	11237.2	7740.84	2107.92	7028.64	5894	9256	5407.99	6852.66
ENSSSCG00000004489	EEF1A1	1	+	92423040	92423220	-	-	92423040	92423060	92423147	92423220	RI	21296	21283	34890	1139	994	5277	32227	38069	31735	1645	6501	5406	228	141	0.00488343	0.028901	0.92	0.93	0.803	0.924	0.784	0.784	0.054	206215	203785	222004	210668	228268	258577	203584	230143
ENSSSCG00000004489	EEF1A1	1	+	92424305	92424540	-	-	92424305	92424388	92424451	92424540	RI	21613	26526	63579	883	1168	1666	32091	64744	62890	1264	1531	1500	204	141	0.0037686	0.0237422	0.944	0.94	0.963	0.946	0.967	0.967	-0.011	206215	203785	222004	210668	228268	258577	203584	230143
ENSSSCG00000005625	ENG	1	-	268306119	268310834	-	-	268306119	268310606	268310732	268310834	RI	60	29	24	562	503	469	31	29	144	386	560	543	267	141	0.00066056	0.00581114	0.053	0.03	0.026	0.041	0.027	0.123	-0.027	24706.9	17621.6	6227.07	16185.2	11137.3	12600	8644.24	10793.8
ENSSSCG00000033082	HGS	12	-	1207857	1208152	-	-	1207857	1207947	1208032	1208152	RI	5	4	25	158	160	574	3	7	1	247	418	341	226	141	0.00149421	0.0112627	0.019	0.015	0.026	0.008	0.01	0.002	0.013	5033.13	4343.44	12649.4	7341.98	5299.8	10011	8187.13	7832.64
ENSSSCG00000006496	LMNA	4	-	93900200	93901368	-	-	93900200	93900470	93901278	93901368	RI	660	652	1303	200	190	956	507	974	1773	422	1240	955	949	141	3.94218e-05	0.000646981	0.329	0.338	0.168	0.151	0.105	0.216	0.121	25327.8	21075.7	41107.7	29170.4	21793.4	49118	40741.8	37217.7
ENSSSCG00000000405	NA	5	-	21991523	21991706	-	-	21991523	21991592	21991690	21991706	RI	3700	2734	5894	172	110	104	6305	4799	4519	187	75	92	239	141	0.000534674	0.0049489	0.927	0.936	0.971	0.952	0.974	0.967	-0.02	31895.7	27534.7	28155.4	29195.3	36977	22642	21985.9	27201.6
ENSSSCG00000006063	NA	4	+	36226051	36226843	-	-	36226051	36226182	36226749	36226843	RI	56	113	340	1086	1293	2389	107	64	273	1472	2933	2579	708	141	0.00236119	0.0163525	0.01	0.017	0.028	0.014	0.004	0.021	0.005	39043.7	38171.6	44019.6	40411.6	43826.8	67980	46577.5	52794.8
ENSSSCG00000028097	NA	6	+	165735215	165735502	-	-	165735215	165735296	165735368	165735502	RI	74	73	125	7	10	16	96	106	158	6	8	0	213	141	0.000334735	0.00350463	0.875	0.829	0.838	0.914	0.898	1	-0.09	3135.65	3220.24	4023.38	3459.75	3316.64	3986	3471.93	3591.52
ENSSSCG00000006037	OXR1	4	-	30738556	30740621	-	-	30738556	30738630	30740525	30740621	RI	265	565	78	38	35	71	57	123	134	155	34	70	2036	141	0.000549477	0.0050531	0.326	0.528	0.071	0.025	0.2	0.117	0.194	4474.69	7994.43	1884.15	4784.42	8532.17	3808	2911.65	5083.94
ENSSSCG00000023978	RECQL5	12	+	5769266	5770135	-	-	5769266	5769336	5769415	5770135	RI	3	3	4	49	31	145	0	9	17	20	71	131	220	141	0.00554988	0.0315085	0.038	0.058	0.017	0	0.075	0.077	-0.013	1988.75	1471.74	2809.64	2090.05	1420.96	2045	2229.54	1898.5
ENSSSCG00000017139	RPTOR	12	-	1711866	1713492	-	-	1711866	1711953	1713364	1713492	RI	39	26	295	45	41	106	109	246	237	39	85	82	1552	141	8.10282e-05	0.00117221	0.073	0.054	0.202	0.202	0.208	0.208	-0.096	3194.49	2891.38	5474.71	3853.53	2993.41	5213	3696.04	3967.48
ENSSSCG00000010589	SFXN2	14	+	113729763	113731642	-	-	113729763	113729813	113731594	113731642	RI	7	10	101	10	18	49	12	8	26	4	10	65	1922	141	0.00775426	0.0416046	0.049	0.039	0.131	0.18	0.055	0.029	-0.015	754.188	1046.78	1172.3	991.088	332.838	531	885.768	583.202
ENSSSCG00000033732	ANKRD10	11	-	77328203	77328299	77348541	77348633	77324442	77324918	77355749	77356139	MXE	1	10	5	76	49	99	0	3	0	141	141	223	233	237	1.27165e-05	0.000913279	0.013	0.172	0.049	0	0.021	0	0.071	4055.56	3954.37	6173.66	4727.87	5689.18	10394	7417.86	7833.68
ENSSSCG00000021439	CCDC66	13	+	38441578	38441604	38450277	38450719	38440887	38440952	38452347	38452513	MXE	0	0	6	2	6	19	0	0	0	6	15	36	167	583	0.00338526	0.0469186	0	0	0.524	0	0	0	0.175	182.542	222.325	674.093	359.654	404.313	366	381.521	383.944
ENSSSCG00000022112	DOCK9	11	-	67816607	67816651	67817205	67817273	67809427	67809543	67819941	67819989	MXE	4	23	35	49	40	19	6	4	6	73	56	60	209	185	0.000328598	0.00933786	0.067	0.337	0.62	0.068	0.059	0.081	0.272	9322.87	7466.41	6675.55	7821.61	7477.12	10037	9134.26	8882.79
ENSSSCG00000016147	PIKFYVE	15	+	111449404	111449525	111451265	111451361	111448459	111448597	111453971	111454055	MXE	4	1	1	14	7	7	15	22	9	12	25	18	262	237	0.000895542	0.0201433	0.205	0.114	0.114	0.531	0.443	0.311	-0.284	813.034	1118.57	1036.92	989.511	1169.2	1534	1036.95	1246.72
ENSSSCG00000038919	RP9	18	+	40558852	40558944	40562599	40562661	40408020	40408150	40563594	40563793	MXE	0	0	0	8	7	5	3	7	2	4	5	7	233	203	4.82136e-08	1.06961e-05	0	0	0	0.395	0.549	0.199	-0.381	727.768	823.297	570.032	707.032	775.555	889	867.092	843.882
ENSSSCG00000038919	RP9	18	+	40558852	40558944	40562599	40562661	40550036	40550166	40563594	40564236	MXE	4	5	25	19	24	8	25	32	27	8	11	10	233	203	0.0028996	0.0422636	0.155	0.154	0.731	0.731	0.717	0.702	-0.37	727.768	823.297	570.032	707.032	775.555	889	867.092	843.882
ENSSSCG00000038919	RP9	18	+	40413348	40413410	40558852	40558944	40408020	40408150	40563594	40563793	MXE	11	6	4	0	0	0	4	10	17	3	7	2	203	233	1.44019e-06	0.000183508	1	1	1	0.605	0.621	0.907	0.289	727.768	823.297	570.032	707.032	775.555	889	867.092	843.882
ENSSSCG00000011540	SETD5	13	+	65803804	65804029	65805688	65806298	65802807	65802994	65807358	65807551	MXE	18	19	9	3	8	0	20	29	19	37	14	20	366	751	0.000155875	0.00533179	0.925	0.83	1	0.526	0.81	0.661	0.253	7107.14	6948.81	7868.11	7308.02	6681.29	7104	6438.72	6741.34
ENSSSCG00000004486	SLC17A5	1	+	92300799	92300887	92303786	92303873	92297993	92298227	92306354	92306473	MXE	6	10	8	21	16	20	20	11	5	8	10	4	229	228	0.000583847	0.0150691	0.221	0.384	0.285	0.713	0.523	0.554	-0.3	1222.55	1106.99	800.256	1043.27	608.069	1006	795.946	803.338
ENSSSCG00000004486	SLC17A5	1	+	92300799	92300887	92303786	92303873	92295666	92295863	92306354	92306473	MXE	3	7	0	21	16	20	1	0	0	8	10	4	229	228	0.000882079	0.0201433	0.125	0.303	0	0.111	0	0	0.106	1222.55	1106.99	800.256	1043.27	608.069	1006	795.946	803.338
ENSSSCG00000017139	RPTOR	12	-	1711866	1713492	-	-	1713364	1713492	1711071	1711188	A5ss	70	58	394	0	0	0	126	360	323	0	0	8	1639	141	0.001847	0.0172623	1	1	1	1	1	0.776	0.075	3194.49	2891.38	5474.71	3853.53	2993.41	5213	3696.04	3967.48
ENSSSCG00000022112	DOCK9	11	-	67817205	67817342	-	-	67817205	67817273	67819941	67819989	A3ss	7	12	13	6	4	29	7	11	25	0	2	0	210	141	3.0985e-08	2.07969e-06	0.439	0.668	0.231	1	0.787	1	-0.483	9322.87	7466.41	6675.55	7821.61	7477.12	10037	9134.26	8882.79
ENSSSCG00000011540	SETD5	13	+	65808265	65808474	-	-	65808322	65808474	65807833	65807939	A3ss	1	3	20	27	28	11	31	26	21	21	32	10	198	141	0.00307826	0.0259562	0.026	0.071	0.564	0.512	0.367	0.599	-0.272	7107.14	6948.81	7868.11	7308.02	6681.29	7104	6438.72	6741.34
